# Supplementary material for: Data-independent acquisition-based proteome and phosphoproteome profiling across six melanoma cell lines reveals determinants of proteotypes
Source: Royal Society of Chemistry journal article supplement (doi:10.1039/d0mo00188k), 2021-02-16
Supplement: d0mo00188k2.pdf [file d0mo00188k2.pdf]

| Symbol   | gene               | A375_mRNA   | G361_mRNA   | SK_mRNA     |
|----------|--------------------|-------------|-------------|-------------|
| MT-ATP8  | ENSG00000228253.1  | 13.92251158 | 14.77337016 | 14.68029243 |
| MT-ND4   | ENSG00000198886.2  | 13.64030071 | 14.77978641 | 14.66620346 |
| MT-CO3   | ENSG00000198938.2  | 13.36157688 | 14.34546903 | 13.9883417  |
| MT-CO1   | ENSG00000198804.2  | 13.40109476 | 14.7538652  | 14.83718245 |
| MT-ND4L  | ENSG00000212907.2  | 13.05150148 | 14.16314921 | 14.02586146 |
| MT-CO2   | ENSG00000198712.1  | 12.8756702  | 14.68929103 | 14.5597598  |
| MT-CYB   | ENSG00000198727.2  | 12.78563941 | 13.90239919 | 13.72466718 |
| GAPDH    | ENSG00000111640.14 | 13.28976743 | 12.64153542 | 12.53056835 |
| MT-RNR2  | ENSG00000210082.2  | 12.03486993 | 13.63527799 | 14.5017436  |
| MT-ND3   | ENSG00000198840.2  | 11.81814895 | 12.50844568 | 12.6967757  |
| MT-ND2   | ENSG00000198763.3  | 11.83534044 | 12.77284034 | 12.88136936 |
| MTATP6P1 | ENSG00000248527.1  | 11.73601345 | 12.5239128  | 12.52356697 |
| MT-ND5   | ENSG00000198786.2  | 11.65928566 | 13.02594189 | 13.10088694 |
| MT-ND1   | ENSG00000198888.2  | 11.56571368 | 13.51411975 | 12.70208823 |
| MT-ATP6  | ENSG00000198899.2  | 12.83000264 | 12.09514136 | 14.31586263 |
| ACTB     | ENSG00000075624.13 | 11.16625324 | 11.33879621 | 11.1986671  |
| MT-RNR1  | ENSG00000211459.2  | 11.50907673 | 11.88056288 | 12.30504879 |
| HSPA8    | ENSG00000109971.13 | 10.82898997 | 10.8542048  | 10.921654   |
| ENO1     | ENSG00000074800.13 | 11.85247527 | 10.72642626 | 10.59687072 |
| HSP90AB1 | ENSG00000096384.19 | 11.32348982 | 10.9927171  | 10.81576194 |
| EEF1A1   | ENSG00000156508.17 | 11.97236039 | 10.87843143 | 10.92119249 |
| RPS27    | ENSG00000177954.11 | 11.87722357 | 11.01467053 | 10.38806561 |
| RPS2     | ENSG00000140988.15 | 11.86698124 | 10.78413007 | 10.78528259 |
| PPIA     | ENSG00000196262.13 | 11.07042358 | 11.1044663  | 10.14401648 |
| EEF2     | ENSG00000167658.15 | 11.7644013  | 11.10776734 | 11.18432984 |
| YBX1     | ENSG00000065978.18 | 11.17971161 | 10.51274392 | 10.11681148 |
| RPS18    | ENSG00000231500.6  | 11.1532339  | 10.73557046 | 10.59048496 |
| RPL19    | ENSG00000108298.9  | 11.22471862 | 10.78568652 | 11.06304749 |
| RPL11    | ENSG00000142676.12 | 11.21680994 | 10.72490453 | 9.916027439 |
| RPL12    | ENSG00000197958.12 | 11.61469338 | 11.3027295  | 9.935055086 |
| NPM1     | ENSG00000181163.13 | 11.38380799 | 10.15560184 | 10.64827725 |
| CD63     | ENSG00000135404.11 | 9.818956002 | 11.26126433 | 10.96161047 |
| RPS11    | ENSG00000142534.6  | 11.25589867 | 11.12644675 | 10.04303286 |
| FTH1     | ENSG00000167996.15 | 10.09422013 | 10.51502099 | 10.6201496  |
| RPS7     | ENSG00000171863.12 | 10.95236677 | 10.49730939 | 9.727376227 |
| RPL24    | ENSG00000114391.12 | 10.86438064 | 10.04157    | 9.879165035 |
| ALDOA    | ENSG00000149925.17 | 9.971969671 | 10.06643207 | 10.3650383  |
| RPSA     | ENSG00000168028.13 | 11.36906814 | 10.16591132 | 9.609188957 |
| PKM      | ENSG00000067225.17 | 10.81460118 | 10.02685507 | 10.21603228 |
| RPL27    | ENSG00000131469.12 | 11.1934874  | 10.63085749 | 10.33926585 |
| VIM      | ENSG00000026025.15 | 11.73217951 | 10.5043816  | 10.61098467 |
| RPL13A   | ENSG00000142541.16 | 11.39172392 | 10.83468365 | 10.21761922 |
| RPLP1    | ENSG00000137818.11 | 10.54723312 | 9.92156024  | 10.1487224  |
| RPL7     | ENSG00000147604.13 | 10.59762166 | 9.842685609 | 9.830352993 |
| PSAP     | ENSG00000197746.13 | 9.629883655 | 11.07435389 | 11.18678115 |

|           |                    |             |             |             |
|-----------|--------------------|-------------|-------------|-------------|
| RPS8      | ENSG00000142937.11 | 10.87477244 | 9.721728701 | 9.654363141 |
| RPL21     | ENSG00000122026.10 | 10.82907937 | 9.825599035 | 9.487229122 |
| LDHB      | ENSG00000111716.12 | 10.67183874 | 10.44737256 | 10.75219479 |
| TMSB10    | ENSG00000034510.5  | 10.82827279 | 10.96968606 | 9.450726239 |
| RPL30     | ENSG00000156482.10 | 10.51631076 | 9.682617954 | 9.549519895 |
| RPLP0     | ENSG00000089157.15 | 10.77742832 | 9.631838822 | 10.62170945 |
| RPS10     | ENSG00000124614.13 | 10.45136445 | 10.28545584 | 9.702088761 |
| RPL8      | ENSG00000161016.17 | 10.72924924 | 9.751230589 | 9.382567031 |
| RPS21     | ENSG00000171858.17 | 10.80115152 | 9.49380503  | 9.633983147 |
| RPL3      | ENSG00000100316.15 | 11.13728139 | 10.30391143 | 10.44811788 |
| FTL       | ENSG00000087086.14 | 10.67658611 | 11.49416123 | 9.719934756 |
| P4HB      | ENSG00000185624.14 | 9.410978292 | 10.15269195 | 9.495040248 |
| RPL41     | ENSG00000229117.8  | 11.36491314 | 10.45250602 | 9.353400682 |
| RPS24     | ENSG00000138326.18 | 11.50419013 | 10.02834286 | 9.934362751 |
| HSPD1     | ENSG00000144381.16 | 9.723710524 | 9.664296286 | 9.378857861 |
| RPL5      | ENSG00000122406.12 | 10.15192892 | 9.730489786 | 9.528399244 |
| RPL35A    | ENSG00000182899.14 | 10.03026317 | 10.09567819 | 9.398467383 |
| RPL39     | ENSG00000198918.7  | 11.11773516 | 10.29107791 | 10.17648881 |
| TUBB      | ENSG00000196230.12 | 10.6959577  | 10.391306   | 9.183364057 |
| NCL       | ENSG00000115053.15 | 9.727681349 | 9.780464285 | 9.195613464 |
| RPS4X     | ENSG00000198034.10 | 10.83176457 | 9.778472365 | 9.646041039 |
| RPS16     | ENSG00000105193.8  | 10.7696849  | 10.81561267 | 9.450886698 |
| RPL4      | ENSG00000174444.14 | 10.26920369 | 10.12124092 | 10.21828077 |
| RPL7A     | ENSG00000148303.16 | 11.19128327 | 10.8422018  | 9.169918316 |
| CANX      | ENSG00000127022.14 | 9.163433394 | 9.148271785 | 9.49245524  |
| HNRNPA2B1 | ENSG00000122566.20 | 11.11573594 | 9.370934534 | 9.065649263 |
| PFN1      | ENSG00000108518.7  | 10.81370419 | 9.071675771 | 9.101790229 |
| YWHAZ     | ENSG00000164924.17 | 10.38318639 | 10.44815598 | 9.924319449 |
| RPS6      | ENSG00000137154.12 | 11.59134424 | 9.452052694 | 9.26242206  |
| RPL10     | ENSG00000147403.16 | 10.57863415 | 9.653020498 | 9.717342748 |
| ACTG1     | ENSG00000184009.9  | 9.318399977 | 10.21253566 | 10.5792654  |
| PSMA7     | ENSG00000101182.14 | 9.69114864  | 9.33474595  | 9.587927636 |
| GNAS      | ENSG00000087460.24 | 10.91287955 | 9.23102489  | 10.08814668 |
| RPL6      | ENSG00000089009.15 | 11.21505649 | 10.00583789 | 9.032919058 |
| RPLP2     | ENSG00000177600.8  | 9.802621923 | 9.649757945 | 9.139624838 |
| RPL9      | ENSG00000163682.15 | 10.5940503  | 9.356704867 | 10.96606695 |
| PABPC1    | ENSG00000070756.15 | 10.13677197 | 9.464588929 | 9.10928206  |
| RPS12     | ENSG00000112306.7  | 10.65638275 | 9.607471791 | 9.20947591  |
| RPS13     | ENSG00000110700.6  | 9.910860611 | 9.558214867 | 9.233247683 |
| RPS20     | ENSG00000008988.9  | 10.33380007 | 9.586817063 | 8.914868392 |
| TPI1      | ENSG00000111669.14 | 10.3877839  | 9.700695478 | 9.0363696   |
| COX8A     | ENSG00000176340.3  | 9.487581902 | 8.858644764 | 9.706589584 |
| CFL1      | ENSG00000172757.12 | 10.3529984  | 9.118730196 | 9.657528218 |
| CHCHD2    | ENSG00000106153.12 | 9.715952415 | 9.723512883 | 9.421065855 |
| RPS27A    | ENSG00000143947.13 | 10.55764695 | 10.06097421 | 8.852782233 |
| RPL35     | ENSG00000136942.14 | 11.08411741 | 10.94440212 | 8.83929032  |

|          |                    |             |             |             |
|----------|--------------------|-------------|-------------|-------------|
| RPL18A   | ENSG00000105640.12 | 10.69984062 | 10.15839416 | 8.927847813 |
| RPS17    | ENSG00000182774.10 | 10.21835836 | 9.446576146 | 9.083785799 |
| RPS9     | ENSG00000170889.13 | 10.1607614  | 8.911445791 | 9.026541301 |
| ATP1A1   | ENSG00000163399.15 | 10.15167311 | 10.36494199 | 10.36857847 |
| ATP5B    | ENSG00000110955.8  | 9.877859182 | 9.32564791  | 10.18142546 |
| RPL23A   | ENSG00000198242.13 | 10.26366174 | 9.351588329 | 9.690884839 |
| RPL10A   | ENSG00000198755.10 | 10.39751344 | 9.48688416  | 9.330781028 |
| RPL26    | ENSG00000161970.12 | 10.31164898 | 8.932835873 | 9.111897387 |
| CALR     | ENSG00000179218.13 | 10.50270148 | 9.841008937 | 8.749371538 |
| RPS3A    | ENSG00000145425.9  | 10.00908968 | 8.982580332 | 9.470142331 |
| SLC25A5  | ENSG00000005022.5  | 10.00382094 | 9.149645744 | 9.323637489 |
| UQCRH    | ENSG00000173660.11 | 9.943997645 | 8.665979284 | 8.947590259 |
| BTF3     | ENSG00000145741.15 | 10.37297924 | 8.653878605 | 9.224818155 |
| S100A11  | ENSG00000163191.5  | 9.674839205 | 10.02193845 | 8.649316468 |
| ANXA5    | ENSG00000164111.14 | 8.823944091 | 9.518424262 | 8.669060199 |
| RPS29    | ENSG00000213741.9  | 9.952154567 | 8.996029787 | 8.782367068 |
| EEF1G    | ENSG00000254772.9  | 10.87301667 | 9.620146937 | 10.27972604 |
| RPL15    | ENSG00000174748.18 | 9.895334013 | 9.063204443 | 9.022745793 |
| DDX5     | ENSG00000108654.13 | 8.932362821 | 8.991233897 | 9.083381942 |
| SPARC    | ENSG00000113140.10 | 10.85301267 | 9.101276063 | 8.585059466 |
| RPS25    | ENSG00000118181.10 | 10.54083538 | 8.564557237 | 9.425625454 |
| PDIA6    | ENSG00000143870.12 | 8.807157395 | 8.849060774 | 8.588851023 |
| NME2     | ENSG00000243678.11 | 9.422038236 | 9.135498213 | 8.818874821 |
| RPS5     | ENSG00000083845.8  | 10.19742994 | 8.815923015 | 9.028365835 |
| RPN2     | ENSG00000118705.16 | 8.87415587  | 8.589491575 | 8.901888805 |
| EIF4G2   | ENSG00000110321.16 | 8.913747576 | 9.209284878 | 8.86928763  |
| UBB      | ENSG00000170315.13 | 8.860313792 | 8.787018091 | 8.773556732 |
| OAZ1     | ENSG00000104904.12 | 8.507276503 | 9.423687865 | 9.310927543 |
| RAB7A    | ENSG00000075785.12 | 8.721199533 | 9.50115125  | 9.423144749 |
| RACK1    | ENSG00000204628.11 | 9.924854352 | 9.048691078 | 9.386952349 |
| RPL18    | ENSG00000063177.12 | 10.10325802 | 9.486786421 | 9.126355309 |
| GSTP1    | ENSG00000084207.15 | 9.674948645 | 8.510296142 | 9.230184954 |
| PPIB     | ENSG00000166794.4  | 10.05904425 | 10.28993617 | 8.457227782 |
| MT-ND6   | ENSG00000198695.2  | 9.770209654 | 10.06267291 | 8.891824216 |
| HNRNPA1  | ENSG00000135486.17 | 10.27364005 | 8.706731519 | 8.730460528 |
| EIF4H    | ENSG00000106682.14 | 8.765980496 | 8.80687205  | 8.420699613 |
| HNRNPK   | ENSG00000165119.20 | 9.965642391 | 9.015134976 | 8.424679938 |
| LDHA     | ENSG00000134333.13 | 9.932637935 | 10.11558468 | 8.569291536 |
| PRDX5    | ENSG00000126432.13 | 8.906487522 | 8.706976504 | 9.122399243 |
| HSPA5    | ENSG00000044574.7  | 9.396505009 | 9.419873706 | 8.39060969  |
| COX6A1   | ENSG00000111775.2  | 9.400764333 | 9.280702015 | 10.96467332 |
| HSP90AA1 | ENSG00000080824.18 | 10.77877433 | 9.796974188 | 8.669090078 |
| RPL36    | ENSG00000130255.12 | 9.885589157 | 8.749672696 | 8.631452075 |
| BSG      | ENSG00000172270.18 | 9.136138357 | 9.951223367 | 9.30583634  |
| RPS15    | ENSG00000115268.9  | 8.749935807 | 8.653472228 | 8.410744248 |
| PSMB4    | ENSG00000159377.10 | 10.18411432 | 9.402150857 | 8.981157381 |

|          |                    |             |             |             |
|----------|--------------------|-------------|-------------|-------------|
| PCBP2    | ENSG00000197111.15 | 9.607052535 | 8.433139466 | 8.467491827 |
| MIF      | ENSG00000240972.1  | 8.920746759 | 9.51494339  | 9.5466976   |
| PARK7    | ENSG00000116288.12 | 9.006434842 | 8.560224205 | 8.504676133 |
| EIF5A    | ENSG00000132507.17 | 10.29948665 | 8.707801152 | 8.35824378  |
| UBA52    | ENSG00000221983.7  | 9.939946631 | 9.37310694  | 8.541838246 |
| SERPINE2 | ENSG00000135919.12 | 11.55108404 | 8.535553202 | 10.72957179 |
| TPT1     | ENSG00000133112.16 | 9.534532573 | 8.816544196 | 10.32353781 |
| VDAC1    | ENSG00000213585.10 | 8.790269486 | 8.280329393 | 8.709911503 |
| RPL31    | ENSG00000071082.10 | 9.047174647 | 9.407456928 | 8.994746971 |
| KHSRP    | ENSG00000088247.17 | 9.03215537  | 8.675252762 | 8.520858964 |
| HLA-A    | ENSG00000206503.12 | 8.293354324 | 9.099222043 | 8.611458087 |
| RHOA     | ENSG00000067560.10 | 9.215796286 | 8.934091041 | 8.313694258 |
| SQSTM1   | ENSG00000161011.19 | 9.2757718   | 8.597223711 | 9.110876219 |
| CTNNB1   | ENSG00000168036.16 | 8.352292361 | 10.48295012 | 8.253263014 |
| RPS14    | ENSG00000164587.11 | 10.81096289 | 8.931865643 | 9.361075887 |
| PCBP1    | ENSG00000169564.6  | 9.428928247 | 9.292063302 | 8.232118344 |
| HSPB1    | ENSG00000106211.8  | 8.433091372 | 9.641579875 | 8.222761791 |
| EEF1B2   | ENSG00000114942.13 | 9.131425178 | 9.151984893 | 8.239009005 |
| CLIC1    | ENSG00000213719.8  | 8.406434889 | 8.891978671 | 9.373801599 |
| MDH1     | ENSG00000014641.17 | 8.294865104 | 9.038997615 | 8.54381361  |
| TMBIM6   | ENSG00000139644.12 | 9.25647565  | 8.706704122 | 8.984241392 |
| H2AFZ    | ENSG00000164032.11 | 9.073650136 | 9.454119332 | 8.214069285 |
| ATP5A1   | ENSG00000152234.15 | 8.961871675 | 9.120187895 | 9.323291887 |
| RPL29    | ENSG00000162244.10 | 9.950340887 | 9.213283745 | 8.771070835 |
| MSN      | ENSG00000147065.16 | 8.225577502 | 8.70254951  | 8.916591965 |
| DBI      | ENSG00000155368.16 | 8.305102424 | 9.26235606  | 9.721789381 |
| NACA     | ENSG00000196531.10 | 9.591064965 | 8.796532199 | 9.295008995 |
| ARHGDI2  | ENSG00000141522.11 | 8.522610905 | 8.37169737  | 8.783993079 |
| ATP5H    | ENSG00000167863.11 | 8.497310891 | 8.548249058 | 9.093101556 |
| RPS15A   | ENSG00000134419.15 | 9.725688937 | 8.97246786  | 8.743373928 |
| PGK1     | ENSG00000102144.13 | 8.647764152 | 8.597248991 | 8.238576536 |
| CAPRIN1  | ENSG00000135387.20 | 8.826669933 | 8.436248204 | 8.335260571 |
| PRKCSH   | ENSG00000130175.9  | 9.394941162 | 8.143612866 | 8.185918535 |
| DYNLL1   | ENSG00000088986.10 | 8.402029194 | 8.345509578 | 8.437053647 |
| RPL36A   | ENSG00000241343.9  | 10.2341456  | 9.164897102 | 9.258175278 |
| SET      | ENSG00000119335.16 | 9.614044423 | 9.239657283 | 8.106278982 |
| TKT      | ENSG00000163931.15 | 9.261356366 | 8.688777901 | 8.1402711   |
| MFSD12   | ENSG00000161091.12 | 9.117218243 | 11.14908263 | 11.25449313 |
| ERGIC3   | ENSG00000125991.19 | 8.152676855 | 8.146034367 | 8.317867231 |
| GPI      | ENSG00000105220.14 | 8.887003802 | 8.328045665 | 8.877140462 |
| MTPN     | ENSG00000105887.10 | 8.268907388 | 8.723529398 | 8.741361868 |
| EIF3E    | ENSG00000104408.9  | 9.414811271 | 8.547245925 | 8.97204984  |
| GANAB    | ENSG00000089597.16 | 9.002431306 | 8.550079958 | 8.113287679 |
| GNB1     | ENSG00000078369.17 | 8.20782915  | 8.431233341 | 8.272589184 |
| PEBP1    | ENSG00000089220.4  | 8.232687125 | 9.24059316  | 9.200397588 |
| XRCC6    | ENSG00000196419.12 | 8.912580922 | 8.683331704 | 8.086888755 |

|             |                    |             |             |             |
|-------------|--------------------|-------------|-------------|-------------|
| HSPA9       | ENSG00000113013.12 | 9.076427388 | 8.8116786   | 10.21702924 |
| ATP6VOC     | ENSG00000185883.11 | 8.593968374 | 8.908430012 | 9.16291408  |
| RPL34       | ENSG00000109475.16 | 9.424344808 | 8.513194972 | 8.300807382 |
| HNRNPL      | ENSG00000104824.16 | 9.312198997 | 8.50105646  | 8.053702186 |
| NME1-NME2   | ENSG00000011052.21 | 8.520976088 | 8.483523548 | 8.085759644 |
| CLTC        | ENSG00000141367.11 | 8.156605165 | 8.448587576 | 8.367528438 |
| XRCC5       | ENSG00000079246.15 | 8.526871445 | 8.477691906 | 8.005467728 |
| SSBP1       | ENSG00000106028.10 | 9.047296623 | 8.506928788 | 8.00514017  |
| GPNMB       | ENSG00000136235.15 | 8.044522818 | 9.946319487 | 9.178603777 |
| YWHAG       | ENSG00000170027.6  | 8.327049009 | 8.567677577 | 8.063795505 |
| AP2M1       | ENSG00000161203.13 | 8.134637479 | 8.395736606 | 8.014850386 |
| EIF3K       | ENSG00000178982.9  | 9.14576789  | 8.485520684 | 8.018178783 |
| PSMB7       | ENSG00000136930.12 | 9.099098065 | 9.323075434 | 7.971981616 |
| EIF4A1      | ENSG00000161960.14 | 9.724536594 | 8.593914199 | 8.10904496  |
| GARS        | ENSG00000106105.13 | 8.567646571 | 9.300393601 | 9.672929017 |
| ATP5F1      | ENSG00000116459.10 | 8.543206056 | 7.988660255 | 8.158169427 |
| HSP90B1     | ENSG00000166598.14 | 9.820060068 | 9.373479462 | 8.028493401 |
| ACTR2       | ENSG00000138071.13 | 8.608232759 | 8.281213821 | 8.061976042 |
| MAT2A       | ENSG00000168906.12 | 8.713168773 | 7.983740118 | 8.068984522 |
| LGALS1      | ENSG00000100097.11 | 9.789133769 | 9.595364556 | 8.127929864 |
| DYNLRB1     | ENSG00000125971.16 | 8.39099199  | 8.001336858 | 9.127493591 |
| EIF3I       | ENSG00000084623.11 | 9.675891449 | 8.773137796 | 7.917597388 |
| STIP1       | ENSG00000168439.16 | 8.614173124 | 8.003164838 | 8.060097369 |
| MT-TL1      | ENSG00000209082.1  | 7.993013202 | 11.38106442 | 8.927550435 |
| CSDE1       | ENSG00000009307.15 | 8.864865967 | 8.252235618 | 8.160126136 |
| SRRM2       | ENSG00000167978.16 | 8.545022679 | 8.167503405 | 8.404460347 |
| RAC1        | ENSG00000136238.17 | 8.633979763 | 8.639250366 | 8.433005254 |
| ATP5J2      | ENSG00000241468.7  | 8.819034431 | 9.065821695 | 7.897571538 |
| ATF4        | ENSG00000128272.14 | 9.111096001 | 8.711551433 | 9.869280136 |
| RPL23       | ENSG00000125691.12 | 9.072914832 | 8.799931229 | 9.155774633 |
| YWHAQ       | ENSG00000134308.13 | 9.029212138 | 8.395077275 | 7.893664608 |
| CCT8        | ENSG00000156261.12 | 8.510611662 | 8.187930513 | 7.937585889 |
| YWHAE       | ENSG00000108953.16 | 9.170794379 | 8.040112807 | 8.469223052 |
| COX6B1      | ENSG00000126267.8  | 8.585270035 | 9.048018041 | 8.320323448 |
| AHCY        | ENSG00000101444.12 | 8.031822556 | 7.875643481 | 8.142412117 |
| SOD1        | ENSG00000142168.14 | 8.494430037 | 8.070703558 | 8.291320493 |
| ANXA2       | ENSG00000182718.16 | 9.142621658 | 9.130781222 | 7.9098691   |
| COX5B       | ENSG00000135940.6  | 7.88035764  | 8.168481434 | 8.030370748 |
| HDLBP       | ENSG00000115677.16 | 7.954439311 | 8.955747619 | 8.929598633 |
| PSMB3       | ENSG00000277791.4  | 8.926686246 | 8.474660954 | 7.879532546 |
| NOP10       | ENSG00000182117.5  | 8.339216032 | 8.474765084 | 8.103987057 |
| CCT2        | ENSG00000166226.12 | 8.946966006 | 7.9636628   | 8.518082088 |
| SERBP1      | ENSG00000142864.14 | 9.558751979 | 8.068551594 | 7.841191625 |
| TUFM        | ENSG00000178952.10 | 9.263750397 | 8.337416454 | 8.036058935 |
| LRRC75A-AS1 | ENSG00000175061.17 | 9.24977838  | 8.161746464 | 8.672352413 |
| HNRNPAB     | ENSG00000197451.11 | 8.975245595 | 7.97786473  | 7.855066004 |

|          |                    |             |             |             |
|----------|--------------------|-------------|-------------|-------------|
| CCT6A    | ENSG00000146731.10 | 9.174428404 | 9.278741937 | 7.93208347  |
| SCD      | ENSG00000099194.5  | 8.194238466 | 9.143674766 | 8.862876066 |
| MDH2     | ENSG00000146701.11 | 8.673564174 | 8.709840941 | 8.021599809 |
| MYL12B   | ENSG00000118680.12 | 8.20221779  | 8.795313346 | 8.227633064 |
| CCT7     | ENSG00000135624.15 | 9.295841588 | 8.785457246 | 7.822250972 |
| PTMA     | ENSG00000187514.16 | 10.0712824  | 9.367041883 | 8.419104866 |
| DDOST    | ENSG00000244038.9  | 9.138533263 | 8.993033617 | 8.350844859 |
| FLNA     | ENSG00000196924.14 | 9.123384624 | 9.022801243 | 7.801744592 |
| RPL22    | ENSG00000116251.9  | 8.613813064 | 8.449868843 | 8.001918206 |
| DDX17    | ENSG00000100201.20 | 7.909387161 | 8.236270683 | 8.601206899 |
| MALAT1   | ENSG00000251562.7  | 7.992674789 | 9.105929392 | 9.053446674 |
| ARF1     | ENSG00000143761.15 | 9.043517786 | 7.965729013 | 8.658030093 |
| RPL38    | ENSG00000172809.12 | 9.588294272 | 9.120908504 | 8.801182187 |
| TOMM7    | ENSG00000196683.10 | 7.773468812 | 9.41616888  | 7.888857896 |
| RPL37A   | ENSG00000197756.9  | 8.573099059 | 8.551536331 | 8.096376199 |
| RPL17    | ENSG00000265681.7  | 9.350386108 | 9.243938066 | 8.071835317 |
| SF3B2    | ENSG00000087365.15 | 8.722139701 | 7.973710004 | 8.194971147 |
| NORAD    | ENSG00000260032.1  | 8.221910963 | 7.783528462 | 8.302461465 |
| RPS3     | ENSG00000149273.14 | 9.542298916 | 8.648165857 | 8.78787031  |
| MORF4L1  | ENSG00000185787.14 | 8.463145728 | 8.683368766 | 8.491884597 |
| C1orf43  | ENSG00000143612.19 | 8.534010435 | 8.433178528 | 7.94620994  |
| EWSR1    | ENSG00000182944.17 | 8.369618257 | 7.700047046 | 7.943597997 |
| ATP6V1F  | ENSG00000128524.4  | 7.704338186 | 9.269994829 | 8.794376913 |
| SLC3A2   | ENSG00000168003.16 | 7.930842612 | 9.067631054 | 9.284664483 |
| RPL13    | ENSG00000167526.13 | 9.749763809 | 8.569495021 | 8.927674823 |
| EIF2S2   | ENSG00000125977.6  | 8.26494276  | 7.781639271 | 8.801577765 |
| ACOT7    | ENSG00000097021.19 | 8.05358487  | 7.765609669 | 8.112015745 |
| SRSF9    | ENSG00000111786.8  | 8.177455503 | 7.893116712 | 8.726306234 |
| UBA1     | ENSG00000130985.16 | 8.644802697 | 8.682057756 | 7.694056862 |
| EIF4G1   | ENSG00000114867.20 | 8.691892421 | 9.049701243 | 7.707361223 |
| KPNB1    | ENSG00000108424.9  | 8.629153024 | 8.335295287 | 8.065722473 |
| RTN4     | ENSG00000115310.17 | 8.443093939 | 8.292493843 | 8.767239331 |
| USMG5    | ENSG00000173915.14 | 9.257304339 | 8.10944469  | 8.14736666  |
| MORF4L2  | ENSG00000123562.16 | 8.447279715 | 8.830637474 | 7.713426347 |
| CDC42    | ENSG00000070831.15 | 8.107933545 | 8.068640748 | 8.065910411 |
| ARPC2    | ENSG00000163466.15 | 7.726227532 | 8.52699319  | 8.15829588  |
| CCT3     | ENSG00000163468.14 | 9.40662344  | 9.159639556 | 7.73342913  |
| SFPQ     | ENSG00000116560.10 | 8.987041654 | 7.67439045  | 8.123843713 |
| CTSB     | ENSG00000164733.20 | 7.78195032  | 8.762281437 | 13.02227165 |
| LGALS3BP | ENSG00000108679.12 | 9.26045721  | 9.607341225 | 8.871647332 |
| ATP5J    | ENSG00000154723.12 | 8.294309495 | 7.958504005 | 8.5064957   |
| KDELR1   | ENSG00000105438.8  | 8.041293297 | 9.116613223 | 7.880420816 |
| TMA7     | ENSG00000232112.3  | 8.938962547 | 8.616960841 | 7.690751838 |
| PTBP1    | ENSG00000011304.19 | 8.853708669 | 8.14137536  | 7.67087511  |
| PDIA3    | ENSG00000167004.12 | 8.191226426 | 8.527384142 | 7.672030292 |
| C1QBP    | ENSG00000108561.8  | 9.878965127 | 7.624838476 | 7.643103211 |

|          |                    |             |             |             |
|----------|--------------------|-------------|-------------|-------------|
| NME1     | ENSG00000239672.7  | 9.060954403 | 8.597874277 | 8.610606097 |
| CAP1     | ENSG00000131236.16 | 8.825109056 | 8.467196782 | 8.172252603 |
| EIF4B    | ENSG00000063046.17 | 9.057860842 | 7.991867025 | 8.549890901 |
| SND1     | ENSG00000197157.10 | 7.602947228 | 9.008398006 | 7.962096847 |
| LRRCS9   | ENSG00000108829.9  | 8.043448877 | 8.41554126  | 7.66012599  |
| CBX3     | ENSG00000122565.18 | 8.344600626 | 8.175702705 | 7.796883311 |
| HNRNPU   | ENSG00000153187.18 | 9.094832496 | 7.959265239 | 7.951290907 |
| CCT5     | ENSG00000150753.11 | 9.385244421 | 8.387404227 | 7.913510861 |
| EDF1     | ENSG00000107223.12 | 8.527842517 | 8.902076094 | 9.446137188 |
| MAPRE1   | ENSG00000101367.8  | 7.581602847 | 7.579989462 | 7.809293815 |
| DDB1     | ENSG00000167986.13 | 8.275778168 | 7.957753938 | 8.027228733 |
| CNBP     | ENSG00000169714.16 | 8.301188371 | 8.205483918 | 7.890162208 |
| GSN      | ENSG00000148180.19 | 8.954731856 | 9.250738252 | 8.714490121 |
| RPS23    | ENSG00000186468.12 | 8.948686406 | 8.024537443 | 7.798479603 |
| SRP14    | ENSG00000140319.10 | 8.32214105  | 8.013436414 | 8.169761631 |
| HADHA    | ENSG00000084754.10 | 7.535548866 | 8.193537686 | 7.621299881 |
| SERF2    | ENSG00000140264.19 | 8.395560894 | 9.030687591 | 7.905837444 |
| PSMC3    | ENSG00000165916.8  | 8.27440612  | 7.986552158 | 7.599411352 |
| SDHB     | ENSG00000117118.9  | 7.938529151 | 8.088656907 | 7.577814975 |
| RPS28    | ENSG00000233927.4  | 8.735250499 | 8.474281309 | 7.954621706 |
| SF1      | ENSG00000168066.20 | 8.084434405 | 7.591064196 | 7.750234935 |
| NQO1     | ENSG00000181019.12 | 8.839022337 | 7.71801283  | 7.959697481 |
| PPDPF    | ENSG00000125534.9  | 7.658493201 | 7.621200427 | 8.190973224 |
| CCT4     | ENSG00000115484.14 | 8.983804429 | 8.776408497 | 7.525576638 |
| RALY     | ENSG00000125970.11 | 7.492519081 | 7.752185465 | 8.388335567 |
| RPS19    | ENSG00000105372.6  | 8.650872847 | 10.18903599 | 9.696737009 |
| AES      | ENSG00000104964.14 | 7.706079764 | 7.986348804 | 8.151094888 |
| CTNNA1   | ENSG00000044115.20 | 8.889770677 | 8.269046836 | 8.899242357 |
| APP      | ENSG00000142192.20 | 8.338441315 | 8.979659975 | 9.207086291 |
| GSTO1    | ENSG00000148834.12 | 7.916534706 | 8.885349518 | 8.91284157  |
| CALU     | ENSG00000128595.16 | 7.504322415 | 9.09221253  | 8.0380897   |
| HNRNPC   | ENSG00000092199.17 | 9.564142065 | 8.266570384 | 7.611211193 |
| NDUFS5   | ENSG00000168653.10 | 8.738198391 | 8.358824695 | 7.522895764 |
| HNRNPUL1 | ENSG00000105323.16 | 8.53115825  | 8.023856204 | 7.694729647 |
| STRAP    | ENSG00000023734.10 | 8.780918367 | 7.915249409 | 7.773532461 |
| SLC7A5   | ENSG00000103257.8  | 8.754127215 | 9.75135214  | 9.686854037 |
| MGAT4B   | ENSG00000161013.16 | 8.054364185 | 7.555290019 | 8.07109221  |
| C20orf24 | ENSG00000101084.17 | 7.556030029 | 7.677925692 | 7.422177656 |
| UQCRC1   | ENSG00000010256.10 | 7.530334069 | 7.62962842  | 8.258295108 |
| EIF3B    | ENSG00000106263.17 | 8.436467533 | 8.523579189 | 7.453328194 |
| FUS      | ENSG00000089280.18 | 8.596879882 | 7.57046412  | 7.618882301 |
| HNRNPF   | ENSG00000169813.16 | 8.823480487 | 8.004024832 | 8.544905378 |
| CTSD     | ENSG00000117984.13 | 7.5784323   | 10.1971817  | 10.82673231 |
| ACLY     | ENSG00000131473.16 | 7.669813628 | 7.659749585 | 7.510837849 |
| HM13     | ENSG00000101294.16 | 8.243303188 | 7.889667118 | 7.59358385  |
| EIF2S3   | ENSG00000130741.10 | 8.925706534 | 7.406876236 | 8.403492541 |

|          |                    |             |             |             |
|----------|--------------------|-------------|-------------|-------------|
| IFI16    | ENSG00000163565.18 | 7.630262676 | 7.557112087 | 8.712923531 |
| RBM39    | ENSG00000131051.22 | 8.014386291 | 7.574401238 | 8.004573072 |
| RPN1     | ENSG00000163902.11 | 8.155121672 | 8.536227778 | 7.549079486 |
| CTSA     | ENSG00000064601.16 | 7.42164386  | 8.429443667 | 8.655733876 |
| PSMD2    | ENSG00000175166.16 | 7.432021019 | 8.247298001 | 7.625989002 |
| UBC      | ENSG00000150991.14 | 7.564350653 | 7.780439119 | 8.636280464 |
| ARPC1A   | ENSG00000241685.9  | 7.759979042 | 8.431612526 | 7.691882816 |
| PFDN5    | ENSG00000123349.13 | 8.024174052 | 7.48991554  | 7.43393289  |
| CALM2    | ENSG00000143933.16 | 9.466731891 | 8.270531454 | 8.126093866 |
| AP2S1    | ENSG00000042753.11 | 8.557975973 | 7.431050754 | 8.270722262 |
| PSMD8    | ENSG00000099341.11 | 8.197151739 | 8.066239205 | 8.112292902 |
| NUCB1    | ENSG00000104805.15 | 8.063338705 | 8.780447993 | 7.627653551 |
| NDUFB8   | ENSG00000166136.15 | 8.081492739 | 7.367462369 | 7.954855073 |
| UBL5     | ENSG00000198258.10 | 8.751882844 | 8.292996891 | 7.635708365 |
| TRIM28   | ENSG00000130726.11 | 8.733645833 | 7.670512312 | 7.451475577 |
| MLF2     | ENSG00000089693.10 | 7.911758213 | 7.559436631 | 7.411956645 |
| HSPE1    | ENSG00000115541.10 | 8.109366173 | 8.45366935  | 7.376967738 |
| SRSF1    | ENSG00000136450.12 | 8.184681005 | 7.344976129 | 7.550791399 |
| ATIC     | ENSG00000138363.14 | 7.558284813 | 7.480564255 | 7.820394697 |
| NARS     | ENSG00000134440.11 | 7.957600414 | 8.166606754 | 8.038755542 |
| NHP2     | ENSG00000145912.8  | 8.781196215 | 7.574916501 | 7.33453535  |
| ACTN4    | ENSG00000130402.11 | 8.891466697 | 8.610514422 | 8.962801621 |
| ARPC3    | ENSG00000111229.15 | 8.691854772 | 8.11995453  | 7.340819196 |
| COX6C    | ENSG00000164919.10 | 7.397507267 | 7.849361255 | 8.387224375 |
| RPL27A   | ENSG00000166441.12 | 8.167278161 | 7.956342673 | 7.514164196 |
| TUBA1B   | ENSG00000123416.15 | 10.28700631 | 9.173249352 | 7.547847736 |
| AUP1     | ENSG00000115307.16 | 7.683057043 | 7.816878136 | 7.34633925  |
| COX4I1   | ENSG00000131143.8  | 8.405640238 | 8.038021788 | 8.346085052 |
| RAB1B    | ENSG00000174903.15 | 8.062256845 | 7.285185446 | 7.748227834 |
| FKBP10   | ENSG00000141756.18 | 8.270876953 | 8.647389458 | 7.598861894 |
| CDK4     | ENSG00000135446.16 | 8.202416646 | 7.829138153 | 8.999525006 |
| NDUFV2   | ENSG00000178127.12 | 7.665912176 | 8.134380888 | 7.716271873 |
| ADRM1    | ENSG00000130706.12 | 8.576902361 | 7.850760352 | 8.651019907 |
| RPL36AL  | ENSG00000165502.6  | 7.883959862 | 7.309507567 | 7.569151954 |
| COX7C    | ENSG00000127184.12 | 8.239444937 | 8.024713779 | 8.48118838  |
| HNRNPM   | ENSG00000099783.11 | 8.865350782 | 7.621526752 | 7.428408347 |
| CCNI     | ENSG00000118816.9  | 7.536703374 | 8.042152745 | 8.288505751 |
| VCP      | ENSG00000165280.15 | 8.881245117 | 7.464344497 | 7.339535584 |
| PFKP     | ENSG00000067057.16 | 7.306611138 | 7.453918607 | 7.600664496 |
| EIF3L    | ENSG00000100129.17 | 8.835215612 | 7.796614738 | 8.396287522 |
| EIF4EBP1 | ENSG00000187840.4  | 8.478863779 | 7.607004909 | 7.903135435 |
| CSNK1E   | ENSG00000213923.11 | 7.309014104 | 8.187232463 | 7.868275315 |
| SEC11A   | ENSG00000140612.13 | 7.737144181 | 7.481495525 | 7.264578932 |
| SNRPB    | ENSG00000125835.18 | 9.645073527 | 8.499855334 | 7.414406821 |
| RPL28    | ENSG00000108107.14 | 8.999176855 | 7.336775555 | 7.927152697 |
| GLO1     | ENSG00000124767.6  | 7.634699598 | 8.149978195 | 7.517255276 |



|         |                    |             |             |             |
|---------|--------------------|-------------|-------------|-------------|
| IQGAP1  | ENSG00000140575.12 | 7.303737794 | 8.057138034 | 8.265272249 |
| ATP5C1  | ENSG00000165629.19 | 7.94536401  | 7.485388011 | 8.253186479 |
| CAPZB   | ENSG00000077549.17 | 7.605324416 | 7.990303643 | 8.001507166 |
| UQCRCQ  | ENSG00000164405.10 | 8.258345276 | 7.426295892 | 7.447067649 |
| KPNA2   | ENSG00000182481.8  | 8.360692763 | 8.200323577 | 7.338715703 |
| CD44    | ENSG00000026508.17 | 8.730947554 | 8.06068969  | 8.86895411  |
| SLC39A7 | ENSG00000112473.17 | 7.303601637 | 8.182531705 | 7.279388335 |
| HEXB    | ENSG00000049860.13 | 7.425309208 | 7.588563053 | 7.319103493 |
| EIF3G   | ENSG00000130811.11 | 8.396124901 | 7.361983969 | 7.541827652 |
| TMED9   | ENSG00000184840.11 | 7.320559509 | 7.893070405 | 7.334481469 |
| ACSL3   | ENSG00000123983.13 | 7.695330135 | 8.801026813 | 7.434772744 |
| PRDX3   | ENSG00000165672.6  | 8.494744943 | 7.250940703 | 7.38455624  |
| COPZ1   | ENSG00000111481.9  | 7.590620337 | 7.551856816 | 7.317878131 |
| MMADHC  | ENSG00000168288.12 | 7.554604968 | 7.311044018 | 7.300142288 |
| PTGES3  | ENSG00000110958.15 | 8.938146723 | 7.558802345 | 7.928824098 |
| PRMT1   | ENSG00000126457.21 | 8.678252665 | 8.136575672 | 7.614778534 |
| HNRNPA3 | ENSG00000170144.20 | 7.568552427 | 8.201275093 | 7.365922827 |
| CTTN    | ENSG00000085733.15 | 7.470391786 | 8.153599435 | 7.655866859 |
| IPO7    | ENSG00000205339.9  | 7.739202589 | 7.260488087 | 7.866199412 |
| AK2     | ENSG00000004455.16 | 7.883509647 | 7.542041585 | 7.365593377 |
| ST13    | ENSG00000100380.13 | 7.646282802 | 7.616747964 | 7.879747305 |
| TBCA    | ENSG00000171530.13 | 8.265954097 | 7.534849047 | 7.778432861 |
| PSMD14  | ENSG00000115233.11 | 7.469777826 | 7.538205623 | 7.217330666 |
| HYOU1   | ENSG00000149428.18 | 8.240907277 | 7.285027292 | 7.816764617 |
| COX5A   | ENSG00000178741.11 | 7.658772958 | 7.683156554 | 8.066721941 |
| CRTAP   | ENSG00000170275.14 | 7.219239554 | 7.764018131 | 7.319480848 |
| NDUFA11 | ENSG00000174886.12 | 8.192166012 | 7.847727312 | 8.138162824 |
| PSMC2   | ENSG00000161057.11 | 8.054929821 | 7.760663904 | 7.186480912 |
| GHITM   | ENSG00000165678.20 | 8.583191669 | 7.170282347 | 8.545100868 |
| ACTN1   | ENSG00000072110.13 | 7.913640789 | 7.292765516 | 8.530712962 |
| AKR1B1  | ENSG00000085662.13 | 7.340483683 | 7.200992688 | 8.003166576 |
| GNG12   | ENSG00000172380.5  | 7.952342412 | 7.913651726 | 7.200510686 |
| PDIA4   | ENSG00000155660.10 | 8.220955528 | 8.629074234 | 7.187704897 |
| DAD1    | ENSG00000129562.10 | 7.226576893 | 7.373295471 | 7.511849013 |
| SMS     | ENSG00000102172.15 | 8.599424761 | 7.298976751 | 7.462990208 |
| SSU72   | ENSG00000160075.11 | 7.687684109 | 8.089186702 | 7.285632584 |
| COPA    | ENSG00000122218.14 | 7.887109474 | 8.35961862  | 7.185775861 |
| TPM4    | ENSG00000167460.14 | 7.728105789 | 8.521154761 | 8.215473135 |
| SHMT2   | ENSG00000182199.10 | 8.428611832 | 7.548833988 | 8.679464475 |
| POMP    | ENSG00000132963.7  | 8.727301793 | 7.836482734 | 7.227246631 |
| CHD4    | ENSG00000111642.14 | 8.205336451 | 7.803030736 | 7.672438161 |
| HSPA4   | ENSG00000170606.14 | 8.333748532 | 7.722485098 | 7.660642821 |
| PSMD1   | ENSG00000173692.12 | 7.559166706 | 7.825580354 | 7.160705494 |
| PFDN2   | ENSG00000143256.4  | 9.210059327 | 8.400742286 | 7.346965826 |
| ROMO1   | ENSG00000125995.15 | 7.980567773 | 7.531449336 | 7.513453943 |
| SLC4A2  | ENSG00000164889.13 | 7.700416511 | 8.257476104 | 7.26270642  |

|          |                    |             |             |             |
|----------|--------------------|-------------|-------------|-------------|
| IDH1     | ENSG00000138413.13 | 7.391518891 | 8.402313548 | 9.08565284  |
| COPG1    | ENSG00000181789.14 | 7.177451803 | 8.006130925 | 7.530249555 |
| EMC7     | ENSG00000134153.9  | 7.522828829 | 7.82843867  | 7.232839593 |
| SLC25A6  | ENSG00000169100.13 | 8.585946465 | 7.291429032 | 9.878258483 |
| SAE1     | ENSG00000142230.11 | 7.870143033 | 7.205132661 | 7.524617718 |
| EID1     | ENSG00000255302.4  | 8.234694142 | 8.055889742 | 8.022039411 |
| TFG      | ENSG00000114354.13 | 7.465271488 | 7.69539313  | 7.646290989 |
| LGALS3   | ENSG00000131981.15 | 7.147345032 | 9.495855038 | 10.32412674 |
| WDR1     | ENSG00000071127.16 | 7.633348512 | 7.431162674 | 9.387081486 |
| PSMD4    | ENSG00000159352.15 | 8.77494673  | 8.255615711 | 7.183146688 |
| TIMP1    | ENSG00000102265.11 | 9.506928717 | 8.447776355 | 7.171474423 |
| TRIB2    | ENSG00000071575.11 | 7.261158651 | 7.1458653   | 8.144584044 |
| ATP6V1E1 | ENSG00000131100.12 | 7.323447575 | 8.482771626 | 8.167171414 |
| STT3B    | ENSG00000163527.9  | 7.248858487 | 7.575344896 | 7.203920074 |
| DUSP4    | ENSG00000120875.8  | 7.560097009 | 8.364144352 | 8.803006938 |
| MRPL12   | ENSG00000262814.7  | 7.981810068 | 7.960327708 | 8.054172881 |
| LARP1    | ENSG00000155506.16 | 7.731088716 | 7.311156909 | 7.50680591  |
| ETF1     | ENSG00000120705.12 | 8.118939281 | 7.267758928 | 7.452840012 |
| PLP2     | ENSG00000102007.10 | 8.246349245 | 7.134383043 | 7.438621719 |
| VAT1     | ENSG00000108828.15 | 7.236919489 | 9.159494691 | 9.716388714 |
| NDUFB2   | ENSG00000090266.12 | 7.564792282 | 7.470870311 | 7.350123799 |
| CHCHD3   | ENSG00000106554.12 | 7.11472776  | 7.630754777 | 8.080878174 |
| SEPT9    | ENSG00000184640.17 | 8.187890121 | 8.520727196 | 8.10527364  |
| SH3BGR13 | ENSG00000142669.14 | 9.52456991  | 8.53325987  | 7.17562793  |
| RPL32    | ENSG00000144713.12 | 9.359062247 | 8.237744993 | 7.602764834 |
| PGAM1    | ENSG00000171314.8  | 8.725578227 | 7.45707088  | 7.719121722 |
| DNAJA1   | ENSG00000086061.15 | 8.242435406 | 7.385625741 | 7.117265709 |
| HP1BP3   | ENSG00000127483.17 | 7.10768728  | 7.304918949 | 7.317284911 |
| HNRNPH1  | ENSG00000169045.17 | 7.783698563 | 7.27191384  | 7.287600563 |
| ATP1B3   | ENSG00000069849.10 | 7.533488617 | 7.834564577 | 7.07854537  |
| GPX4     | ENSG00000167468.16 | 7.204422506 | 8.550003005 | 8.194212922 |
| AP1S2    | ENSG00000182287.14 | 7.177181087 | 7.519353422 | 7.9130617   |
| SRPRA    | ENSG00000182934.11 | 8.086803666 | 7.223467626 | 7.220692505 |
| HSPH1    | ENSG00000120694.19 | 8.117693963 | 7.24218222  | 7.149340525 |
| SRSF6    | ENSG00000124193.14 | 7.449970066 | 7.066475971 | 7.465010289 |
| TECR     | ENSG00000099797.13 | 8.074557774 | 7.531876686 | 7.210706979 |
| DNAJB1   | ENSG00000132002.7  | 7.33511559  | 7.745248036 | 7.691499332 |
| PSMD3    | ENSG00000108344.14 | 7.873798259 | 7.534364017 | 7.572248606 |
| PHLDA1   | ENSG00000139289.13 | 8.869399359 | 7.0860888   | 9.246222354 |
| NDUFB9   | ENSG00000147684.7  | 8.547991614 | 8.036637951 | 8.380570063 |
| RCN2     | ENSG00000117906.13 | 7.46672516  | 7.684659359 | 7.510534472 |
| ANP32B   | ENSG00000136938.8  | 9.098140105 | 8.29725122  | 7.133081878 |
| GNAI2    | ENSG00000114353.16 | 8.16406583  | 8.306133158 | 7.085996418 |
| AGPAT1   | ENSG00000204310.12 | 7.401273105 | 7.582348731 | 7.241311931 |
| SLC25A3  | ENSG00000075415.12 | 9.142369487 | 8.308975416 | 7.792719825 |
| PRDX6    | ENSG00000117592.8  | 9.055236413 | 8.004452822 | 7.042592792 |

|          |                    |             |             |             |
|----------|--------------------|-------------|-------------|-------------|
| RAN      | ENSG00000132341.11 | 7.967429945 | 7.676936288 | 8.626410662 |
| FAU      | ENSG00000149806.10 | 8.689480975 | 7.800065677 | 7.887202999 |
| TRAM1    | ENSG00000067167.7  | 7.324111091 | 7.353914532 | 7.082039439 |
| CHMP4B   | ENSG00000101421.3  | 7.042679879 | 7.788792349 | 7.813210591 |
| PLOD3    | ENSG00000106397.11 | 8.376194899 | 8.939934795 | 7.042441025 |
| HADHB    | ENSG00000138029.13 | 7.134231632 | 7.771769436 | 7.654325921 |
| PSMC5    | ENSG00000087191.12 | 7.990497561 | 7.494070854 | 7.431668727 |
| AHSA1    | ENSG00000100591.7  | 8.18586933  | 7.289095848 | 7.345744855 |
| RANBP1   | ENSG00000099901.16 | 8.185737019 | 7.821051539 | 7.150509103 |
| TAX1BP1  | ENSG00000106052.13 | 7.339385251 | 7.958255386 | 7.941777082 |
| FASN     | ENSG00000169710.8  | 7.912957365 | 7.402802789 | 8.215606827 |
| TMED2    | ENSG00000086598.10 | 7.986916436 | 7.336774111 | 8.121424573 |
| VDAC3    | ENSG00000078668.13 | 7.153123476 | 7.327176182 | 7.168802379 |
| ZNF207   | ENSG00000010244.18 | 7.721679814 | 7.083451566 | 7.173273533 |
| CYCS     | ENSG00000172115.8  | 7.017419282 | 7.720833232 | 7.582624772 |
| MRPL51   | ENSG00000111639.7  | 8.256401998 | 7.023458791 | 7.076203648 |
| RCN1     | ENSG00000049449.8  | 7.656333746 | 7.635008084 | 7.542256715 |
| G3BP1    | ENSG00000145907.14 | 8.372983718 | 7.735683689 | 7.907994337 |
| RPL14    | ENSG00000188846.13 | 8.378067702 | 8.173083075 | 7.584348089 |
| SRP9     | ENSG00000143742.12 | 7.667678843 | 6.983233651 | 7.683585214 |
| BRI3     | ENSG00000164713.9  | 7.049413098 | 9.38304243  | 8.807006944 |
| CLIC4    | ENSG00000169504.14 | 8.170488282 | 7.699469868 | 7.305998272 |
| NDUFAB1  | ENSG00000004779.9  | 8.41882634  | 7.520009605 | 7.502928483 |
| PHB      | ENSG00000167085.11 | 7.605167954 | 7.761224454 | 7.849131441 |
| SNRNP200 | ENSG00000144028.14 | 7.581731628 | 7.499107069 | 7.002094898 |
| MYL12A   | ENSG00000101608.12 | 7.067013589 | 8.605492868 | 7.867047398 |
| SSRP1    | ENSG00000149136.8  | 8.948313396 | 7.198066806 | 7.098806519 |
| DDX39B   | ENSG00000198563.13 | 8.137224419 | 7.568626137 | 7.303967951 |
| LAMP2    | ENSG00000005893.15 | 6.976812127 | 9.235794325 | 7.950424808 |
| EEF1D    | ENSG00000104529.17 | 7.631565137 | 7.062429627 | 7.343278448 |
| RAB5C    | ENSG00000108774.14 | 7.447512658 | 7.81113107  | 7.634191325 |
| COX7A2   | ENSG00000112695.11 | 7.922545411 | 7.316337591 | 7.41208372  |
| SNRPC    | ENSG00000124562.9  | 7.689274495 | 7.246095856 | 7.559443461 |
| AP2B1    | ENSG00000006125.17 | 7.202886818 | 7.446541652 | 7.788808062 |
| ILF2     | ENSG00000143621.16 | 9.28729842  | 8.665828772 | 7.064317832 |
| EIF4A2   | ENSG00000156976.16 | 7.076545329 | 7.646702283 | 7.907107212 |
| COTL1    | ENSG00000103187.7  | 8.802706997 | 8.218033533 | 8.762931372 |
| CD81     | ENSG00000110651.11 | 6.951576947 | 8.000642253 | 9.535406411 |
| LAMP1    | ENSG00000185896.10 | 8.035708465 | 7.778779028 | 6.95747433  |
| HINT1    | ENSG00000169567.11 | 7.786656644 | 7.098254494 | 7.388583299 |
| SCAMP3   | ENSG00000116521.10 | 8.18345659  | 7.514836259 | 7.013159052 |
| TARS     | ENSG00000113407.13 | 8.144180069 | 7.638041066 | 7.926802778 |
| SUMO2    | ENSG00000188612.11 | 7.925140284 | 7.30058264  | 7.300075386 |
| ERH      | ENSG00000100632.10 | 8.214233088 | 6.943732553 | 7.104660355 |
| FXR1     | ENSG00000114416.17 | 7.213861425 | 7.525165837 | 7.790253123 |
| ATP2A2   | ENSG00000174437.16 | 8.093945356 | 8.001243554 | 7.034697463 |

|         |                    |             |             |             |
|---------|--------------------|-------------|-------------|-------------|
| ATP5O   | ENSG00000241837.6  | 7.558339393 | 7.447301618 | 8.111620256 |
| PSMB1   | ENSG00000008018.8  | 8.632644091 | 7.713827591 | 6.93949967  |
| OS9     | ENSG00000135506.15 | 7.086909113 | 7.375850108 | 9.755967063 |
| CSE1L   | ENSG00000124207.16 | 8.607323542 | 6.922931389 | 7.013274981 |
| ELOB    | ENSG00000103363.14 | 7.70065127  | 7.388683945 | 7.428031228 |
| PTP4A2  | ENSG00000184007.18 | 7.545898418 | 6.937936747 | 7.632314027 |
| SNHG6   | ENSG00000245910.8  | 8.087269197 | 7.507202866 | 7.381243292 |
| GNG5    | ENSG00000174021.10 | 7.45148501  | 7.426978632 | 7.108202365 |
| HNRNPH3 | ENSG00000096746.17 | 7.470461058 | 7.226840739 | 6.95634593  |
| BAG6    | ENSG00000204463.12 | 7.444707128 | 7.326105201 | 8.018267589 |
| SNRPD2  | ENSG00000125743.10 | 8.552176204 | 7.125200763 | 7.357818666 |
| CALM1   | ENSG00000198668.10 | 7.141589674 | 7.549005332 | 6.997364284 |
| NDUFB7  | ENSG00000099795.6  | 8.196411369 | 8.422414929 | 7.1511086   |
| MTCH2   | ENSG00000109919.9  | 7.29510155  | 7.331950072 | 7.156245495 |
| PSMA6   | ENSG00000100902.10 | 7.766310029 | 7.20048513  | 7.068693152 |
| PXN     | ENSG00000089159.16 | 8.518356493 | 6.942995034 | 8.348030401 |
| TALDO1  | ENSG00000177156.10 | 7.244018826 | 8.334576984 | 7.00641772  |
| PPP1CA  | ENSG00000172531.14 | 7.488178214 | 7.101888441 | 7.525692306 |
| RAD21   | ENSG00000164754.14 | 8.064391155 | 6.966469747 | 7.149986593 |
| PPP4C   | ENSG00000149923.13 | 8.042165063 | 7.233797557 | 6.924201791 |
| NDUFB4  | ENSG00000065518.7  | 7.03664439  | 7.259627175 | 6.89470857  |
| TAF15   | ENSG00000270647.5  | 7.821573328 | 6.915769029 | 6.985441196 |
| SF3B1   | ENSG00000115524.15 | 7.252030852 | 7.268688239 | 6.892239713 |
| PRELID1 | ENSG00000169230.9  | 7.833692938 | 7.09803183  | 7.548482865 |
| ELOVL5  | ENSG00000012660.13 | 6.947796069 | 6.985735972 | 7.201512953 |
| FBXO7   | ENSG00000100225.17 | 7.225025661 | 7.722881266 | 7.887721937 |
| S100A10 | ENSG00000197747.8  | 9.332339773 | 8.343788945 | 7.005438339 |
| SEC61B  | ENSG00000106803.9  | 8.028424    | 8.983756494 | 6.942044464 |
| BCAP31  | ENSG00000185825.15 | 8.116961003 | 7.994733365 | 7.757391885 |
| SPTBN1  | ENSG00000115306.15 | 8.075063021 | 7.762779081 | 8.505522782 |
| FIS1    | ENSG00000214253.8  | 7.225189284 | 7.583735987 | 6.996550309 |
| UBAP2L  | ENSG00000143569.18 | 8.178429031 | 7.855858458 | 6.923755677 |
| LARS    | ENSG00000133706.17 | 7.45842432  | 7.034987757 | 7.448849716 |
| BEX3    | ENSG00000166681.13 | 6.984518832 | 7.571953528 | 7.092827066 |
| POLR2L  | ENSG00000177700.5  | 7.200884724 | 7.730205044 | 6.924683    |
| CCND1   | ENSG00000110092.3  | 7.81894725  | 7.210802311 | 10.83638022 |
| PHB2    | ENSG00000215021.8  | 8.866836645 | 7.437220741 | 7.667809342 |
| CNP     | ENSG00000173786.16 | 7.947315179 | 8.198629039 | 7.316881283 |
| LMAN2   | ENSG00000169223.14 | 7.096786821 | 6.909623891 | 7.106344264 |
| PDAP1   | ENSG00000106244.12 | 7.938343517 | 7.606784859 | 7.023497766 |
| ZFAND5  | ENSG00000107372.12 | 7.355630794 | 7.933438134 | 7.570618996 |
| SSB     | ENSG00000138385.15 | 6.864736542 | 7.644769574 | 7.225939224 |
| SUMF2   | ENSG00000129103.17 | 7.738569248 | 8.316350411 | 6.990452581 |
| PTTG1   | ENSG00000164611.12 | 8.079526958 | 6.918787209 | 7.539642718 |
| SNRNP70 | ENSG00000104852.14 | 7.685799673 | 7.98746543  | 6.985344936 |
| BRK1    | ENSG00000254999.3  | 7.396660371 | 7.633510826 | 6.86584102  |

|          |                    |             |             |             |
|----------|--------------------|-------------|-------------|-------------|
| ARL6IP1  | ENSG00000170540.14 | 7.990911743 | 6.927709609 | 7.268433989 |
| STAU1    | ENSG00000124214.19 | 8.005378213 | 6.850719332 | 7.516365198 |
| TMX2     | ENSG00000213593.9  | 7.948169301 | 7.293899754 | 7.154984901 |
| UBE2S    | ENSG00000108106.13 | 8.597541649 | 6.826732496 | 7.460994043 |
| TCP1     | ENSG00000120438.11 | 8.333518285 | 7.307406073 | 6.973017196 |
| ATP5I    | ENSG00000169020.9  | 8.177255721 | 6.845280284 | 8.771107856 |
| MYDGF    | ENSG00000074842.7  | 7.736225322 | 8.039784173 | 6.9367244   |
| MYL6     | ENSG00000092841.18 | 8.344778131 | 8.20337684  | 6.885447258 |
| SSR3     | ENSG00000114850.6  | 7.240575956 | 8.144037176 | 6.910218504 |
| APLP2    | ENSG00000084234.16 | 7.689094591 | 6.882647548 | 7.245040605 |
| PA2G4    | ENSG00000170515.13 | 8.917811152 | 7.730342451 | 6.890784928 |
| PSMA2    | ENSG00000106588.10 | 7.899491393 | 7.912521526 | 7.328645506 |
| NAP1L1   | ENSG00000187109.13 | 9.178844286 | 7.316953069 | 9.168011395 |
| ATP6V1G1 | ENSG00000136888.6  | 7.072718203 | 9.296605845 | 7.180174497 |
| SEM1     | ENSG00000127922.9  | 7.218819067 | 7.746916855 | 6.898659265 |
| ATP6V0D1 | ENSG00000159720.11 | 7.272888286 | 7.000075124 | 7.670719611 |
| YWHAB    | ENSG00000166913.12 | 8.731555029 | 7.276445469 | 7.953780585 |
| DHX15    | ENSG00000109606.12 | 8.209330899 | 6.8404428   | 8.353788519 |
| NUDC     | ENSG00000090273.13 | 8.430050519 | 7.415909484 | 6.847068101 |
| HMGN1    | ENSG00000205581.10 | 7.289927411 | 7.107602815 | 7.201410563 |
| BUD31    | ENSG00000106245.10 | 7.555758985 | 6.866931396 | 7.095539894 |
| TM9SF2   | ENSG00000125304.8  | 7.499459902 | 6.823414783 | 7.02392693  |
| IARS     | ENSG00000196305.17 | 7.888054156 | 8.457018421 | 7.623460509 |
| RBM3     | ENSG00000102317.17 | 8.054264175 | 7.138464332 | 7.24914617  |
| SERINC3  | ENSG00000132824.13 | 7.378423313 | 6.879995503 | 7.55414762  |
| SHC1     | ENSG00000160691.18 | 7.520467189 | 7.240765835 | 6.800012994 |
| TXN      | ENSG00000136810.12 | 9.117740766 | 9.281188342 | 6.964121069 |
| PTPA     | ENSG00000119383.19 | 7.984159456 | 7.342513554 | 7.715624806 |
| PSMA1    | ENSG00000129084.17 | 7.413350997 | 7.613443787 | 7.675347745 |
| LMNA     | ENSG00000160789.19 | 9.168207699 | 8.05088758  | 7.166389782 |
| GRN      | ENSG00000030582.17 | 6.989158838 | 8.770901864 | 7.774614941 |
| U2AF2    | ENSG00000063244.12 | 8.333464458 | 6.839235776 | 7.442862106 |
| COPS9    | ENSG00000172428.10 | 6.835539978 | 7.245706929 | 6.992730711 |
| CST3     | ENSG00000101439.8  | 7.55570753  | 8.541740876 | 6.810640206 |
| SF3B6    | ENSG00000115128.6  | 8.412380567 | 8.544778535 | 6.837997739 |
| FDPS     | ENSG00000160752.14 | 7.486780062 | 8.276272767 | 6.841917828 |
| LAMC1    | ENSG00000135862.5  | 7.761072658 | 6.845465024 | 6.991457359 |
| TMED3    | ENSG00000166557.12 | 6.852998704 | 8.254621255 | 7.180387851 |
| CERS2    | ENSG00000143418.19 | 7.67145501  | 7.571058965 | 7.381755597 |
| APEH     | ENSG00000164062.12 | 7.193891089 | 7.245270797 | 7.170171206 |
| EBNA1BP2 | ENSG00000117395.12 | 8.318075168 | 7.025732662 | 6.793690882 |
| STARD7   | ENSG00000084090.13 | 6.853904021 | 7.723253118 | 7.169476333 |
| CCDC47   | ENSG00000108588.13 | 7.703104892 | 7.162649878 | 7.71079983  |
| ARF5     | ENSG00000004059.10 | 6.868459946 | 6.872881831 | 6.822501295 |
| HNRNPD   | ENSG00000138668.18 | 8.503399994 | 7.569902847 | 7.526766445 |
| ST3GAL4  | ENSG00000110080.18 | 7.571536407 | 7.267514504 | 7.11662796  |

|         |                    |             |             |             |
|---------|--------------------|-------------|-------------|-------------|
| QARS    | ENSG00000172053.17 | 7.588182562 | 7.157848858 | 7.346136029 |
| TTYH3   | ENSG00000136295.14 | 7.091758969 | 10.45347109 | 6.797269707 |
| NELFCD  | ENSG00000101158.13 | 7.489931585 | 6.917118463 | 6.796919005 |
| VMP1    | ENSG00000062716.12 | 6.914347467 | 6.936077521 | 6.808456529 |
| ARF4    | ENSG00000168374.10 | 8.199399    | 8.519886242 | 7.441759866 |
| SON     | ENSG00000159140.19 | 6.805116445 | 6.984433182 | 7.773125337 |
| HGS     | ENSG00000185359.12 | 7.601592515 | 7.350865328 | 7.554022293 |
| UQCRB   | ENSG00000156467.9  | 7.163126152 | 6.970204566 | 7.203607143 |
| ZC3H15  | ENSG00000065548.17 | 6.980772574 | 7.231305732 | 6.81386265  |
| LONP1   | ENSG00000196365.11 | 7.654798306 | 6.945222922 | 8.186182219 |
| SARS    | ENSG00000031698.12 | 7.746272421 | 7.446787522 | 8.467818343 |
| ARPC1B  | ENSG00000130429.12 | 7.388966705 | 9.13601322  | 8.093567795 |
| COPB2   | ENSG00000184432.9  | 7.768850281 | 8.281467908 | 6.79028779  |
| POLDIP2 | ENSG00000004142.11 | 7.996581801 | 7.424787542 | 7.467775246 |
| MTDH    | ENSG00000147649.9  | 7.143707152 | 7.110494772 | 6.758773903 |
| LAPTM4A | ENSG00000068697.6  | 7.59030531  | 8.024207017 | 6.793333524 |
| SPG21   | ENSG00000090487.10 | 7.384478685 | 7.546887852 | 6.837190328 |
| PRPF8   | ENSG00000174231.16 | 8.18107067  | 6.752922324 | 7.373120525 |
| AP1S1   | ENSG00000106367.13 | 7.447360777 | 7.999418682 | 7.181655659 |
| HMGB1   | ENSG00000189403.14 | 8.038866726 | 6.924018237 | 6.759515702 |
| ALYREF  | ENSG00000183684.7  | 7.951560342 | 7.140243277 | 6.809511535 |
| RCC2    | ENSG00000179051.13 | 8.146962368 | 6.73992408  | 7.047268747 |
| SF3A1   | ENSG00000099995.18 | 7.409605151 | 7.068227321 | 7.204141004 |
| EIF6    | ENSG00000242372.6  | 8.628547132 | 7.117295311 | 7.237516    |
| IMPDH2  | ENSG00000178035.11 | 9.223334229 | 7.509377588 | 6.747141412 |
| DRAP1   | ENSG00000175550.7  | 8.528225948 | 6.945950494 | 7.338772195 |
| ADAR    | ENSG00000160710.15 | 7.462741596 | 7.516734657 | 6.765512079 |
| DCBLD2  | ENSG00000057019.15 | 8.279256883 | 7.162471112 | 8.199468085 |
| CAPNS1  | ENSG00000126247.10 | 7.697809298 | 7.776665222 | 7.51377596  |
| NONO    | ENSG00000147140.15 | 8.814328602 | 8.083050093 | 8.135952984 |
| NDUFS2  | ENSG00000158864.12 | 8.374395751 | 7.789709672 | 7.465516857 |
| PARP1   | ENSG00000143799.12 | 8.332974931 | 7.002092906 | 6.731797018 |
| SDF4    | ENSG00000078808.16 | 6.724604628 | 7.467211732 | 7.539973081 |
| HIGD2A  | ENSG00000146066.2  | 7.436790861 | 7.091594122 | 7.944650586 |
| PTMS    | ENSG00000159335.15 | 8.583594649 | 6.748333852 | 7.207175934 |
| HLA-C   | ENSG00000204525.16 | 7.406501018 | 6.730361989 | 7.08904688  |
| COPE    | ENSG00000105669.13 | 8.154409755 | 7.754862556 | 6.81965143  |
| OST4    | ENSG00000228474.5  | 7.804198525 | 8.166345983 | 6.722916246 |
| H2AFV   | ENSG00000105968.18 | 7.090705001 | 6.961866933 | 6.882098493 |
| ATP6V0B | ENSG00000117410.13 | 7.301739654 | 7.565599715 | 6.721061364 |
| TMEM230 | ENSG00000089063.14 | 7.797750825 | 7.780607696 | 6.731982622 |
| HAX1    | ENSG00000143575.14 | 7.659845786 | 7.558799292 | 7.009669275 |
| MRPS15  | ENSG00000116898.11 | 7.155127192 | 7.004515475 | 6.699758639 |
| RHEB    | ENSG00000106615.9  | 7.125734666 | 7.545919454 | 8.187008935 |
| MAP2K2  | ENSG00000126934.13 | 7.458452695 | 7.482419864 | 6.82706937  |
| TMCO1   | ENSG00000143183.16 | 8.368838023 | 7.777181321 | 6.786987736 |

|          |                    |             |             |             |
|----------|--------------------|-------------|-------------|-------------|
| CORO1C   | ENSG00000110880.10 | 6.700044894 | 7.593057058 | 7.227488428 |
| AAMP     | ENSG00000127837.9  | 6.82074098  | 6.89850194  | 6.831944799 |
| FKBP8    | ENSG00000105701.15 | 7.926766709 | 7.894221748 | 7.859089195 |
| RPL13AP5 | ENSG00000236552.2  | 8.283874114 | 7.900252865 | 7.2845011   |
| MLEC     | ENSG00000110917.7  | 7.083792093 | 7.329762975 | 8.338716171 |
| KHDRBS1  | ENSG00000121774.17 | 7.951014532 | 6.850966959 | 6.805551084 |
| SELENOH  | ENSG00000211450.9  | 7.680045347 | 6.702616605 | 7.212719925 |
| PRELID3B | ENSG00000101166.15 | 9.003130097 | 6.813736365 | 7.426629418 |
| SLC43A3  | ENSG00000134802.17 | 7.675452031 | 7.525886742 | 7.559878183 |
| VAMP3    | ENSG00000049245.12 | 6.837873139 | 7.773510896 | 7.41835123  |
| SLC39A6  | ENSG00000141424.12 | 6.769322005 | 9.060707542 | 7.034536959 |
| EIF3D    | ENSG00000100353.17 | 7.907917966 | 7.960340221 | 8.054469382 |
| SUPT5H   | ENSG00000196235.13 | 7.341862523 | 8.219601417 | 7.09611335  |
| ATP6V0E1 | ENSG00000113732.8  | 6.693478138 | 8.055567628 | 7.289596688 |
| ITGB1    | ENSG00000150093.18 | 7.884068486 | 7.975981675 | 7.907366903 |
| PSMC4    | ENSG00000013275.7  | 8.611767604 | 8.089965915 | 6.70110198  |
| SLC38A2  | ENSG00000134294.13 | 8.692022218 | 6.73438146  | 8.537425191 |
| TRIP12   | ENSG00000153827.13 | 6.819105536 | 7.181941429 | 7.062281888 |
| TRIR     | ENSG00000123144.10 | 8.117723396 | 7.46030951  | 7.274252323 |
| SDC3     | ENSG00000162512.15 | 7.904227598 | 8.431043779 | 8.161767117 |
| USP22    | ENSG00000124422.11 | 7.651474647 | 6.665498176 | 7.728905118 |
| EIF3A    | ENSG00000107581.12 | 8.210885635 | 7.263365108 | 7.66401785  |
| SEC61A1  | ENSG00000058262.9  | 7.188514774 | 7.812179778 | 6.997791804 |
| PSMD6    | ENSG00000163636.10 | 7.890938013 | 7.285252074 | 6.651416385 |
| GDI1     | ENSG00000203879.11 | 7.591603409 | 7.895645746 | 7.863368527 |
| AURKAIP1 | ENSG00000175756.13 | 7.742936185 | 7.257068132 | 6.891084942 |
| RER1     | ENSG00000157916.19 | 7.917191127 | 7.805322405 | 7.244142156 |
| DLGAP4   | ENSG00000080845.17 | 6.752393727 | 7.344182284 | 7.590208709 |
| RUVBL2   | ENSG00000183207.13 | 8.479099895 | 7.653178714 | 6.924726838 |
| CSNK2B   | ENSG00000204435.13 | 7.019584039 | 7.3617071   | 7.742252652 |
| DPM1     | ENSG00000000419.12 | 8.004095448 | 6.958221862 | 6.764859194 |
| PRDX4    | ENSG00000123131.12 | 7.805664053 | 6.778289716 | 6.84533028  |
| FXYS5    | ENSG00000089327.14 | 8.382052055 | 7.576317126 | 7.710594499 |
| SUCLG1   | ENSG00000163541.11 | 6.651084192 | 7.11735124  | 6.802470809 |
| HLA-E    | ENSG00000204592.8  | 6.672593404 | 7.562115253 | 6.730662632 |
| GDI2     | ENSG00000057608.16 | 8.212157936 | 7.517978443 | 7.788269426 |
| CDC37    | ENSG00000105401.8  | 8.517930995 | 7.867345034 | 7.215362259 |
| GTF3A    | ENSG00000122034.14 | 7.251601847 | 7.198416199 | 7.242020065 |
| CALD1    | ENSG00000122786.19 | 6.651446459 | 8.17199196  | 6.955791226 |
| ATN1     | ENSG00000111676.14 | 7.387651848 | 6.644085676 | 7.127378032 |
| ATXN2L   | ENSG00000168488.18 | 7.623674048 | 6.666185232 | 7.764463544 |
| NDUFB10  | ENSG00000140990.14 | 7.59702271  | 6.830830436 | 7.017493916 |
| DNAJC8   | ENSG00000126698.10 | 7.274686777 | 7.62349539  | 6.651308116 |
| EIF1     | ENSG00000173812.10 | 7.859978575 | 7.403266867 | 8.717862526 |
| RPS26    | ENSG00000197728.9  | 8.986477037 | 8.030245892 | 6.719448322 |
| BAZ1B    | ENSG00000009954.10 | 7.011130704 | 7.113482796 | 6.636838152 |

|          |                     |             |             |             |
|----------|---------------------|-------------|-------------|-------------|
| WWTR1    | ENSG00000018408.14  | 9.210440464 | 7.041267716 | 9.091515207 |
| PPM1G    | ENSG000000115241.10 | 8.5143267   | 7.665499348 | 6.65623195  |
| WARS     | ENSG000000140105.17 | 7.559080299 | 6.679696892 | 6.669395754 |
| TPM3     | ENSG000000143549.19 | 8.436355445 | 8.053976244 | 6.808917595 |
| TSPO     | ENSG000000100300.17 | 6.705180541 | 7.946517522 | 7.356843138 |
| MTCH1    | ENSG000000137409.19 | 6.623053727 | 7.565203068 | 7.247327629 |
| H3F3B    | ENSG000000132475.10 | 7.565853187 | 6.910544828 | 7.882720776 |
| C19orf53 | ENSG000000104979.8  | 8.278712824 | 7.746886946 | 6.6336135   |
| PSMA4    | ENSG000000041357.15 | 8.141149289 | 7.515311845 | 7.077762471 |
| MRPL37   | ENSG000000116221.15 | 7.276480339 | 7.324473476 | 6.838422129 |
| COPB1    | ENSG000000129083.12 | 6.993516792 | 7.958916347 | 6.93774723  |
| ARHGEF2  | ENSG000000116584.17 | 8.045275993 | 7.144517693 | 8.342719338 |
| SDHA     | ENSG000000073578.16 | 6.632041251 | 7.239323041 | 7.627742652 |
| PTPN11   | ENSG000000179295.17 | 7.378895296 | 6.859080766 | 6.660654938 |
| RAB13    | ENSG000000143545.8  | 8.237868337 | 7.909548508 | 6.648675936 |
| ATP5E    | ENSG000000124172.9  | 7.569706638 | 6.598893987 | 7.071075419 |
| PICALM   | ENSG000000073921.17 | 7.029071553 | 6.690718174 | 7.201550907 |
| STMN1    | ENSG000000117632.22 | 8.096975215 | 6.892471455 | 6.908126691 |
| MAZ      | ENSG000000103495.13 | 7.907153236 | 6.817986721 | 6.927704979 |
| UBA2     | ENSG000000126261.12 | 7.829577632 | 7.127108932 | 7.624731092 |
| SSR4     | ENSG000000180879.13 | 7.190511558 | 7.991547903 | 7.025413741 |
| ADIPOR1  | ENSG000000159346.12 | 7.845147141 | 7.543572565 | 7.35276046  |
| ERP29    | ENSG000000089248.6  | 7.57657572  | 8.189870133 | 6.642013936 |
| PABPC4   | ENSG000000090621.13 | 8.109749455 | 7.696579711 | 7.452185666 |
| PPP1CC   | ENSG000000186298.11 | 8.001383938 | 7.422276661 | 6.707353837 |
| GABARAP  | ENSG000000170296.9  | 7.712483407 | 6.784227627 | 7.074542709 |
| UBE2M    | ENSG000000130725.7  | 8.228816987 | 7.640420257 | 7.569015425 |
| B2M      | ENSG000000166710.17 | 8.05668543  | 8.1806868   | 8.654775173 |
| TMED4    | ENSG000000158604.14 | 6.844254184 | 7.341732836 | 6.985897761 |
| SUMO3    | ENSG000000184900.15 | 6.591441357 | 6.742326337 | 6.816913749 |
| MRPL33   | ENSG000000243147.7  | 7.754896291 | 7.317858302 | 6.685875772 |
| BAX      | ENSG000000087088.19 | 7.246268053 | 8.759265641 | 7.105553069 |
| TOMM22   | ENSG000000100216.5  | 7.253950184 | 6.778533318 | 6.696388352 |
| ERGIC1   | ENSG000000113719.15 | 7.555159001 | 7.172286005 | 6.579257212 |
| NDUFS8   | ENSG000000110717.12 | 7.153007979 | 6.820914405 | 7.23941724  |
| UBE2D3   | ENSG000000109332.19 | 7.376427668 | 6.606242004 | 7.214958695 |
| UBE2C    | ENSG000000175063.16 | 8.053167122 | 6.655767543 | 6.647856578 |
| MAP7D1   | ENSG000000116871.15 | 7.877140766 | 7.20643403  | 6.610871878 |
| GOT2     | ENSG000000125166.12 | 7.869652652 | 6.575903728 | 7.216491838 |
| NDUFV1   | ENSG000000167792.11 | 7.196848972 | 7.033055068 | 7.328580732 |
| ETV5     | ENSG000000244405.7  | 6.60038085  | 7.147062705 | 9.371095009 |
| NPC2     | ENSG000000119655.10 | 6.741815636 | 7.055863561 | 6.994782628 |
| TOP1     | ENSG000000198900.5  | 8.534148327 | 6.587346247 | 7.078203503 |
| IK       | ENSG000000113141.17 | 7.884852866 | 6.563345535 | 6.873127626 |
| PRRC2A   | ENSG000000204469.12 | 7.272266321 | 7.235659327 | 7.414533947 |
| GNPDA1   | ENSG000000113552.15 | 6.890128192 | 6.663696281 | 6.609209179 |



|          |                    |             |             |             |
|----------|--------------------|-------------|-------------|-------------|
| SSR2     | ENSG00000163479.13 | 8.618103938 | 7.602296101 | 6.573448796 |
| CD151    | ENSG00000177697.17 | 6.984452826 | 6.917550567 | 6.755552562 |
| CKS2     | ENSG00000123975.4  | 8.560270131 | 8.312012475 | 6.550064545 |
| TOMM20   | ENSG00000173726.10 | 8.444011112 | 6.539907226 | 7.521567522 |
| CCDC124  | ENSG00000007080.10 | 7.986757073 | 7.74756118  | 6.735873032 |
| KARS     | ENSG00000065427.14 | 8.367091861 | 7.222707188 | 7.376126993 |
| DHX9     | ENSG00000135829.16 | 8.556954779 | 7.478001694 | 6.620250097 |
| RAD23B   | ENSG00000119318.12 | 7.754437613 | 7.784439536 | 7.170865358 |
| POLD2    | ENSG00000106628.10 | 6.767480184 | 7.106649584 | 6.677017821 |
| IARS2    | ENSG00000067704.9  | 7.745949008 | 6.523202059 | 7.244180454 |
| NDUFA4   | ENSG00000189043.9  | 6.763321823 | 7.401832657 | 7.194957798 |
| ASNA1    | ENSG00000198356.11 | 7.318875245 | 7.105691728 | 6.63868602  |
| KTN1     | ENSG00000126777.17 | 7.336574864 | 7.391598505 | 7.426143474 |
| MAP4     | ENSG00000047849.21 | 6.57087523  | 7.419844156 | 7.087498162 |
| DARS     | ENSG00000115866.10 | 6.562231773 | 6.92916742  | 6.823703729 |
| NAP1L4   | ENSG00000205531.12 | 6.633200375 | 7.341093424 | 7.923751597 |
| MARS     | ENSG00000166986.14 | 8.245395118 | 7.235521578 | 7.988327769 |
| CNN3     | ENSG00000117519.15 | 7.495242508 | 7.148970101 | 6.532885665 |
| MRPL24   | ENSG00000143314.12 | 8.01526909  | 7.836652929 | 6.675205027 |
| FAM168B  | ENSG00000152102.17 | 6.526806534 | 6.894229677 | 7.295638445 |
| CYC1     | ENSG00000179091.4  | 7.543047013 | 7.515784882 | 6.647529234 |
| SYPL1    | ENSG00000008282.8  | 6.531179213 | 7.099534642 | 6.61248143  |
| SMG5     | ENSG00000198952.8  | 6.810485124 | 6.993860667 | 6.739869741 |
| GNB2     | ENSG00000172354.9  | 7.517772202 | 8.109605165 | 6.516192011 |
| GART     | ENSG00000159131.16 | 7.407376347 | 6.87947913  | 6.890003792 |
| EIF3H    | ENSG00000147677.10 | 7.699672005 | 6.866576662 | 7.585672555 |
| MYH9     | ENSG00000100345.20 | 7.029191468 | 8.275092402 | 8.203782985 |
| MRPL15   | ENSG00000137547.8  | 7.081983542 | 6.747728258 | 7.010995001 |
| CIAO1    | ENSG00000144021.2  | 6.869404417 | 7.053280211 | 6.68309384  |
| INPPL1   | ENSG00000165458.13 | 6.604163759 | 7.12235137  | 7.275044264 |
| SRSF10   | ENSG00000188529.14 | 7.120507048 | 6.561193646 | 6.622855116 |
| KDEL2    | ENSG00000136240.9  | 7.456740773 | 8.614792322 | 6.528389393 |
| KIF5B    | ENSG00000170759.10 | 7.247718675 | 6.504276267 | 6.821954368 |
| DNAJC7   | ENSG00000168259.14 | 7.593211497 | 7.195828645 | 6.961135612 |
| HDGF     | ENSG00000143321.18 | 9.59722446  | 8.370399832 | 6.509951985 |
| MFN2     | ENSG00000116688.16 | 7.003496176 | 6.876981063 | 6.94274535  |
| TMEM14B  | ENSG00000137210.13 | 7.010644037 | 6.602660994 | 7.092370893 |
| YBX3     | ENSG00000060138.12 | 8.062536052 | 7.013673673 | 9.033641699 |
| NDUFB11  | ENSG00000147123.10 | 7.230374748 | 6.728099917 | 6.522598444 |
| CHMP2A   | ENSG00000130724.8  | 7.327717441 | 7.315865708 | 7.173202825 |
| MRPL20   | ENSG00000242485.5  | 7.970966737 | 7.068485362 | 6.708787293 |
| ANAPC5   | ENSG00000089053.12 | 7.671345737 | 7.426407093 | 7.406009215 |
| CORO1B   | ENSG00000172725.13 | 7.125201201 | 6.994874742 | 7.031006381 |
| GIPC1    | ENSG00000123159.15 | 7.273434007 | 7.904422834 | 6.85193485  |
| SLC25A39 | ENSG00000013306.15 | 6.707814259 | 7.509537067 | 7.864409412 |
| TFRC     | ENSG00000072274.12 | 7.239777256 | 7.648552788 | 10.32199406 |

|          |                    |             |             |             |
|----------|--------------------|-------------|-------------|-------------|
| PUF60    | ENSG00000179950.13 | 7.800682378 | 7.019857876 | 6.58574772  |
| SBDS     | ENSG00000126524.9  | 7.071291908 | 7.137193774 | 6.497081976 |
| FBL      | ENSG00000105202.8  | 8.151170486 | 7.470071205 | 6.607164562 |
| NDUFA1   | ENSG00000125356.6  | 7.250911442 | 7.383874249 | 7.750223059 |
| BUD23    | ENSG00000071462.11 | 6.924197046 | 7.34813759  | 6.508673752 |
| HMG2N2   | ENSG00000198830.10 | 9.108103623 | 7.143497732 | 6.685416469 |
| EI24     | ENSG00000149547.14 | 8.055145172 | 6.680954481 | 7.25415603  |
| PPP1R14B | ENSG00000173457.10 | 7.984525393 | 7.456900653 | 6.777197108 |
| PCNA     | ENSG00000132646.10 | 8.835551428 | 8.104511406 | 6.576601479 |
| PDCD6    | ENSG00000249915.7  | 7.636302437 | 7.777584071 | 6.952651432 |
| MACF1    | ENSG00000127603.24 | 6.613649007 | 6.714776568 | 7.350260301 |
| PDZD11   | ENSG00000120509.10 | 6.639998555 | 6.898963768 | 6.489699055 |
| RDX      | ENSG00000137710.14 | 6.508819184 | 6.664761586 | 7.209572368 |
| FKBP2    | ENSG00000173486.12 | 6.786921611 | 6.505419742 | 6.692976504 |
| ATOX1    | ENSG00000177556.11 | 8.53390346  | 9.37199328  | 9.277479066 |
| PIGT     | ENSG00000124155.17 | 7.189317767 | 6.947725997 | 7.076774295 |
| MEA1     | ENSG00000124733.3  | 6.893486674 | 6.495293222 | 6.875459155 |
| B4GALT5  | ENSG00000158470.5  | 6.535317227 | 6.507528876 | 9.113568949 |
| TUBB4B   | ENSG00000188229.5  | 9.778687117 | 9.137157438 | 6.542470675 |
| CNOT1    | ENSG00000125107.17 | 7.042417099 | 6.489995939 | 7.167765754 |
| SEC61G   | ENSG00000132432.13 | 7.796246233 | 8.501743797 | 6.749464567 |
| LAMTOR5  | ENSG00000134248.13 | 7.01242721  | 6.876778871 | 6.559206161 |
| MCFD2    | ENSG00000180398.11 | 6.786211053 | 7.181759279 | 6.480286748 |
| TIMM50   | ENSG00000105197.10 | 7.009364941 | 8.505374196 | 6.83936385  |
| PHC2     | ENSG00000134686.18 | 8.582806823 | 6.584729538 | 7.491404743 |
| DSTN     | ENSG00000125868.15 | 8.544915962 | 7.378023343 | 7.202759022 |
| HNRNPDL  | ENSG00000152795.17 | 7.613548459 | 6.989339717 | 7.05731333  |
| BTBD1    | ENSG00000064726.9  | 6.52827476  | 6.818784659 | 6.776827753 |
| DNAJB11  | ENSG00000090520.11 | 6.600637116 | 7.565718799 | 6.565330729 |
| TIMP2    | ENSG00000035862.12 | 6.856792877 | 9.15659949  | 9.327758423 |
| CDK16    | ENSG00000102225.15 | 7.002165581 | 7.216838566 | 6.955676406 |
| REPIN1   | ENSG00000214022.11 | 6.523833626 | 7.471749174 | 7.365693105 |
| RTFDC1   | ENSG00000022277.12 | 6.862430117 | 6.586096239 | 7.997753918 |
| POLR2B   | ENSG00000047315.15 | 7.669574047 | 6.536232431 | 6.475296512 |
| ATP6V1A  | ENSG00000114573.9  | 6.806176699 | 6.498337559 | 6.524469832 |
| RAB1A    | ENSG00000138069.16 | 6.679997778 | 7.701018152 | 6.831817198 |
| ACIN1    | ENSG00000100813.14 | 6.674340442 | 6.621056827 | 6.627781824 |
| OAT      | ENSG00000065154.11 | 7.980743264 | 7.05308595  | 6.464539105 |
| TRPC4AP  | ENSG00000100991.11 | 6.488280664 | 6.636731594 | 7.122494218 |
| TRMT112  | ENSG00000173113.6  | 8.072770404 | 6.475789459 | 6.653591004 |
| RBMX     | ENSG00000147274.14 | 7.835640001 | 6.885045292 | 7.04558769  |
| SAMM50   | ENSG00000100347.14 | 6.78841397  | 7.628813809 | 7.242391402 |
| CLSTN1   | ENSG00000171603.16 | 6.845235303 | 7.636248676 | 6.814391569 |
| PRDX2    | ENSG00000167815.11 | 8.123065401 | 6.546078731 | 7.561853292 |
| DAZAP1   | ENSG00000071626.16 | 7.418248086 | 6.878122958 | 6.440634445 |
| PSMD12   | ENSG00000197170.9  | 6.969428219 | 6.578042625 | 6.877422517 |

|          |                    |             |             |             |
|----------|--------------------|-------------|-------------|-------------|
| ILF3     | ENSG00000129351.17 | 8.967780111 | 7.435378388 | 6.766275872 |
| C11orf58 | ENSG00000110696.9  | 6.588837353 | 7.25094492  | 7.351333152 |
| TMEM123  | ENSG00000152558.14 | 7.43426274  | 6.418113501 | 7.640248248 |
| YARS     | ENSG00000134684.10 | 7.669653459 | 6.927216653 | 7.418667101 |
| ARL6IP5  | ENSG00000144746.6  | 6.733031462 | 7.194632722 | 6.490346263 |
| COPRS    | ENSG00000172301.10 | 6.559820148 | 6.983342317 | 7.027049664 |
| PRPF19   | ENSG00000110107.8  | 8.662425652 | 6.880925671 | 6.50188001  |
| PTPN1    | ENSG00000196396.9  | 6.603036762 | 7.02781042  | 6.883016739 |
| CHPF     | ENSG00000123989.13 | 6.675041256 | 7.341198589 | 6.514628914 |
| CLTA     | ENSG00000122705.16 | 8.597328941 | 7.718141757 | 7.214245991 |
| XPO1     | ENSG00000082898.16 | 7.651317116 | 7.697359756 | 6.529828122 |
| GSS      | ENSG00000100983.9  | 7.066794055 | 6.432474698 | 7.370466752 |
| UTP18    | ENSG00000011260.13 | 6.864903071 | 6.553402986 | 7.060438641 |
| MCCC2    | ENSG00000131844.15 | 7.728317727 | 6.501936038 | 6.707924408 |
| STT3A    | ENSG00000134910.12 | 7.198635259 | 6.440902524 | 7.102602345 |
| LMAN1    | ENSG00000074695.5  | 6.479417748 | 7.911422261 | 6.405892948 |
| PSMA3    | ENSG00000100567.12 | 7.424186965 | 6.682481408 | 6.411780508 |
| PSMD13   | ENSG00000185627.17 | 7.316243585 | 6.994145877 | 6.698786591 |
| EPRS     | ENSG00000136628.17 | 7.967579138 | 6.398881772 | 6.924469252 |
| POLR2K   | ENSG00000147669.10 | 7.386915974 | 6.83811256  | 6.451970957 |
| LUC7L2   | ENSG00000146963.17 | 6.896857507 | 6.557167997 | 6.742420715 |
| PGD      | ENSG00000142657.20 | 7.770966266 | 6.532249501 | 6.964653892 |
| PHLDA2   | ENSG00000181649.5  | 6.693022845 | 7.830363536 | 6.786161737 |
| HK1      | ENSG00000156515.21 | 7.455981589 | 6.585129543 | 7.693239062 |
| NOP58    | ENSG00000055044.10 | 7.265233292 | 7.038649813 | 6.422158599 |
| TMED10   | ENSG00000170348.8  | 6.759983889 | 6.856585342 | 7.976847835 |
| ESD      | ENSG00000139684.13 | 7.495722805 | 6.664114756 | 6.862376043 |
| UQCR11   | ENSG00000127540.11 | 6.47511494  | 6.73206104  | 7.155225868 |
| EIF5B    | ENSG00000158417.10 | 6.728869042 | 7.111827409 | 6.382210585 |
| SDHD     | ENSG00000204370.9  | 7.391484181 | 6.767685974 | 7.525315913 |
| TMEM147  | ENSG00000105677.11 | 7.026243723 | 7.689820855 | 6.956604389 |
| RARS     | ENSG00000113643.8  | 7.922002323 | 6.962950784 | 6.369420131 |
| SEPT2    | ENSG00000168385.17 | 6.390621515 | 7.300674105 | 6.480834933 |
| NCOA4    | ENSG00000266412.5  | 6.918284982 | 6.405630734 | 7.046021184 |
| RNPS1    | ENSG00000205937.11 | 7.652052805 | 6.528932859 | 6.91914362  |
| IMMT     | ENSG00000132305.20 | 7.575574376 | 6.649147929 | 6.580867861 |
| MATR3    | ENSG00000015479.18 | 7.018601822 | 6.844542965 | 6.561844391 |
| MCL1     | ENSG00000143384.12 | 8.338388964 | 7.17108427  | 6.387079998 |
| DYNC1LI2 | ENSG00000135720.12 | 6.462639316 | 7.067569135 | 7.28817399  |
| RBBP7    | ENSG00000102054.17 | 7.586719941 | 6.452882524 | 7.016629218 |
| SNRPD3   | ENSG00000100028.11 | 6.975990832 | 7.018098263 | 6.442389123 |
| GNS      | ENSG00000135677.10 | 6.379312585 | 7.146417059 | 6.651819423 |
| DPP7     | ENSG00000176978.13 | 6.634378417 | 8.352049767 | 8.000110037 |
| NFE2L1   | ENSG00000082641.15 | 6.513821233 | 6.772776306 | 7.385947087 |
| DTYMK    | ENSG00000168393.12 | 6.682642171 | 6.624906914 | 6.482802193 |
| PPA1     | ENSG00000180817.11 | 7.539368323 | 6.929563447 | 6.401261382 |

|          |                    |             |             |             |
|----------|--------------------|-------------|-------------|-------------|
| ZYX      | ENSG00000159840.15 | 7.116670032 | 7.351738302 | 7.34377398  |
| IVNS1ABP | ENSG00000116679.15 | 6.560893529 | 8.962347612 | 8.055561845 |
| RSL24D1  | ENSG00000137876.9  | 7.825848778 | 6.763177076 | 7.658968546 |
| DDX21    | ENSG00000165732.12 | 8.216478968 | 6.424941725 | 6.452256787 |
| NRDC     | ENSG00000078618.21 | 7.528986454 | 6.980530669 | 6.503413567 |
| GPS1     | ENSG00000169727.12 | 7.317087191 | 6.806055393 | 6.960643818 |
| IPO5     | ENSG00000065150.18 | 7.967284056 | 7.448067531 | 6.406347251 |
| AGAP3    | ENSG00000133612.18 | 6.399451951 | 7.680128806 | 7.576838077 |
| TBRG4    | ENSG00000136270.13 | 6.927989657 | 7.278641529 | 6.395088451 |
| LAP3     | ENSG00000002549.12 | 6.819545331 | 6.381402986 | 8.477816677 |
| PRKDC    | ENSG00000253729.7  | 7.82729435  | 7.062397041 | 6.412630887 |
| PSMB6    | ENSG00000142507.9  | 7.485753068 | 6.3761437   | 6.479501581 |
| FGD5-AS1 | ENSG00000225733.5  | 6.9978607   | 6.70240435  | 6.443065431 |
| HIF1A    | ENSG00000100644.16 | 7.939165731 | 7.857168681 | 6.491841514 |
| AZIN1    | ENSG00000155096.13 | 7.278826905 | 6.473012854 | 7.213834837 |
| DLD      | ENSG00000091140.13 | 6.67574868  | 6.999390374 | 6.732217466 |
| CAST     | ENSG00000153113.23 | 7.174053092 | 6.833357068 | 7.895976091 |
| ARPC4    | ENSG00000241553.12 | 7.335845237 | 7.33478149  | 6.889307193 |
| TPD52L2  | ENSG00000101150.17 | 7.294383767 | 7.193803008 | 7.105387768 |
| LRPPRC   | ENSG00000138095.18 | 6.772479796 | 6.944439049 | 6.325584569 |
| ZFP91    | ENSG00000186660.14 | 7.025641623 | 6.746561103 | 6.832824021 |
| SNX17    | ENSG00000115234.10 | 6.711238172 | 7.11222947  | 6.338916558 |
| ABCF1    | ENSG00000204574.12 | 7.031855307 | 6.383318173 | 6.450340746 |
| DEK      | ENSG00000124795.14 | 7.44004338  | 6.622601574 | 6.935265816 |
| MT2A     | ENSG00000125148.6  | 8.666111862 | 7.637444462 | 7.909463153 |
| TNPO3    | ENSG00000064419.13 | 6.36375153  | 7.087204908 | 6.714008882 |
| ENSA     | ENSG00000143420.18 | 7.526247831 | 6.532756975 | 6.583120279 |
| NDUFA8   | ENSG00000119421.6  | 6.933145823 | 8.16004197  | 7.862971242 |
| CAPN1    | ENSG00000014216.15 | 6.31878072  | 6.87517666  | 7.166006799 |
| DENR     | ENSG00000139726.10 | 7.154766343 | 6.641118132 | 7.740918084 |
| CHID1    | ENSG00000177830.17 | 6.378519836 | 6.632072356 | 6.489653993 |
| LRRFIP1  | ENSG00000124831.18 | 6.353861367 | 7.113094327 | 6.969374791 |
| H3F3A    | ENSG00000163041.9  | 8.629722051 | 6.502353331 | 7.011398554 |
| WSB2     | ENSG00000176871.8  | 6.900085497 | 6.358862227 | 7.064087568 |
| CSNK1D   | ENSG00000141551.14 | 6.816938557 | 6.940008006 | 7.229210511 |
| SAFB     | ENSG00000160633.12 | 6.787163635 | 6.341893277 | 6.463135338 |
| KRTCAP2  | ENSG00000163463.11 | 7.167814847 | 6.936095021 | 6.410764418 |
| PRPF6    | ENSG00000101161.7  | 7.156306492 | 6.351893114 | 7.493482633 |
| HNRNPUL2 | ENSG00000214753.2  | 7.42783878  | 6.311957647 | 7.095154646 |
| SGTA     | ENSG00000104969.9  | 6.679576988 | 6.885161886 | 6.535075228 |
| SSBP4    | ENSG00000130511.15 | 7.352246886 | 6.312079995 | 6.799021267 |
| TPX2     | ENSG00000088325.15 | 7.756907881 | 6.580771415 | 6.394842305 |
| GPAA1    | ENSG00000197858.10 | 7.557387245 | 6.897556461 | 6.471873332 |
| C6orf48  | ENSG00000204387.12 | 6.424960376 | 6.690557157 | 7.876638119 |
| SPCS1    | ENSG00000114902.13 | 7.752304436 | 7.195662837 | 6.388054114 |
| HNRNPR   | ENSG00000125944.19 | 8.088114734 | 6.902107679 | 7.156731301 |

|          |                    |             |             |             |
|----------|--------------------|-------------|-------------|-------------|
| ATG3     | ENSG00000144848.10 | 6.478963289 | 6.442312529 | 6.352717299 |
| CLPTM1L  | ENSG00000049656.13 | 7.558795946 | 6.924418296 | 6.793964303 |
| GRINA    | ENSG00000178719.16 | 6.637285492 | 7.697498953 | 7.110777569 |
| CLPTM1   | ENSG00000104853.15 | 6.921487481 | 6.496138114 | 7.656703223 |
| G3BP2    | ENSG00000138757.14 | 6.445279846 | 8.379317751 | 7.037079156 |
| LY6E     | ENSG00000160932.10 | 7.706640112 | 7.941301593 | 7.893819453 |
| FUBP1    | ENSG00000162613.16 | 7.624275864 | 6.369568944 | 6.675577201 |
| KIAA0100 | ENSG00000007202.14 | 7.039626697 | 7.054934259 | 7.175525553 |
| NIPA2    | ENSG00000140157.14 | 6.638484382 | 6.957521536 | 7.020005336 |
| EFTUD2   | ENSG00000108883.12 | 7.157818134 | 6.892665793 | 6.497174556 |
| AATF     | ENSG00000275700.4  | 7.46732068  | 6.623958369 | 7.511494668 |
| SNRPG    | ENSG00000143977.13 | 8.603603707 | 7.75116353  | 6.333339784 |
| SERINC1  | ENSG00000111897.6  | 6.624686191 | 7.00373796  | 6.967298686 |
| PSMB2    | ENSG00000126067.11 | 7.740719958 | 6.94155854  | 6.552412314 |
| VARS     | ENSG00000204394.12 | 7.268662088 | 7.048565768 | 6.743647867 |
| MTA2     | ENSG00000149480.6  | 7.419618719 | 6.480200128 | 6.318923773 |
| CNPY2    | ENSG00000257727.5  | 7.697945597 | 7.094268735 | 6.29257895  |
| UQCRC2   | ENSG00000140740.10 | 7.051897891 | 7.278037089 | 7.693718047 |
| ATP5G2   | ENSG00000135390.17 | 8.27737235  | 7.60617013  | 7.623318241 |
| COPS6    | ENSG00000168090.9  | 7.188029021 | 7.343595874 | 6.478842333 |
| H1FO     | ENSG00000189060.5  | 8.496477475 | 7.008865756 | 6.39333761  |
| ACADVL   | ENSG00000072778.19 | 8.281844655 | 6.695033074 | 7.642066242 |
| LUC7L3   | ENSG00000108848.15 | 6.864236805 | 6.524134498 | 6.728766299 |
| ITM2C    | ENSG00000135916.15 | 6.287861791 | 7.743741496 | 6.795951324 |
| MCM3AP   | ENSG00000160294.10 | 6.440776402 | 6.507615924 | 6.73465006  |
| SF3B4    | ENSG00000143368.9  | 8.074692741 | 7.576837698 | 6.326680591 |
| AARS     | ENSG00000090861.15 | 8.098378488 | 7.203209992 | 8.85638431  |
| PPP3R1   | ENSG00000221823.10 | 6.627873905 | 6.529631753 | 6.28311412  |
| PGM1     | ENSG00000079739.15 | 6.295828966 | 6.73716351  | 6.337959016 |
| C6orf62  | ENSG00000112308.12 | 6.861581232 | 6.7642592   | 7.063577571 |
| UBE2L3   | ENSG00000185651.14 | 6.27238069  | 6.768832304 | 6.532808546 |
| USF2     | ENSG00000105698.15 | 7.635920882 | 8.015339189 | 7.675393109 |
| TCEA1    | ENSG00000187735.13 | 6.806619475 | 6.275931296 | 7.855440577 |
| VKORC1   | ENSG00000167397.14 | 7.523451225 | 6.631326156 | 6.284725715 |
| ARF3     | ENSG00000134287.9  | 7.412802918 | 6.908961029 | 6.925784156 |
| MKRN1    | ENSG00000133606.10 | 6.478655089 | 6.807692339 | 6.546091376 |
| GLUD1    | ENSG00000148672.8  | 7.405737109 | 6.416322724 | 6.844753121 |
| SLIRP    | ENSG00000119705.9  | 7.475467972 | 6.338760451 | 6.493978808 |
| VEGFB    | ENSG00000173511.9  | 6.336129576 | 7.008770536 | 7.293671687 |
| EMC4     | ENSG00000128463.12 | 7.414325463 | 7.250495263 | 6.817032148 |
| NOL7     | ENSG00000225921.6  | 6.896650265 | 6.786214177 | 7.043579975 |
| VPS25    | ENSG00000131475.6  | 7.333814515 | 6.62508563  | 6.557735646 |
| PPP2CA   | ENSG00000113575.9  | 6.97094898  | 6.243989763 | 6.411176233 |
| IGF2BP2  | ENSG00000073792.15 | 6.773690199 | 6.760700604 | 7.691165528 |
| ABCF2    | ENSG00000033050.7  | 6.910834242 | 7.064700302 | 6.300976755 |
| PRRC2C   | ENSG00000117523.15 | 7.376864137 | 6.641835138 | 6.314348238 |

|          |                    |             |             |             |
|----------|--------------------|-------------|-------------|-------------|
| RBCK1    | ENSG00000125826.20 | 6.42190081  | 6.544920885 | 6.289739238 |
| ATPIF1   | ENSG00000130770.17 | 7.455402684 | 6.677656218 | 6.25157981  |
| ADIPOR2  | ENSG00000006831.9  | 6.72443835  | 6.434141436 | 7.876559233 |
| COA3     | ENSG00000183978.7  | 6.897215671 | 7.049019668 | 7.052459205 |
| HMGA1    | ENSG00000137309.19 | 9.023282969 | 6.316233696 | 7.487403912 |
| DNM2     | ENSG00000079805.16 | 7.204134251 | 6.310117015 | 6.427499554 |
| DCTN1    | ENSG00000204843.12 | 6.473333681 | 6.98330348  | 6.225179301 |
| DYNC1H1  | ENSG00000197102.10 | 6.861415482 | 7.238409428 | 6.272023468 |
| U2SURP   | ENSG00000163714.17 | 7.197070604 | 6.482298225 | 6.635065993 |
| UBE3C    | ENSG00000009335.17 | 6.225550527 | 6.750661156 | 6.425592722 |
| NEDD8    | ENSG00000129559.12 | 6.917093246 | 6.285405534 | 6.295397482 |
| PYGB     | ENSG00000100994.11 | 9.479629007 | 8.18077698  | 6.246466482 |
| HSD17B4  | ENSG00000133835.14 | 7.38741682  | 6.509269825 | 6.655183683 |
| PTTG1IP  | ENSG00000183255.11 | 6.855372748 | 7.651042678 | 8.721793835 |
| FAM50A   | ENSG00000071859.14 | 6.877134545 | 7.107447776 | 6.907807957 |
| MARCKSL1 | ENSG00000175130.6  | 8.814243993 | 8.051582124 | 8.389243102 |
| STOML2   | ENSG00000165283.15 | 8.485564017 | 6.657258084 | 6.33058296  |
| ILK      | ENSG00000166333.13 | 6.525140025 | 7.27812366  | 7.447343435 |
| TM7SF3   | ENSG00000064115.10 | 6.561350453 | 7.294778407 | 7.660262193 |
| PSMB5    | ENSG00000100804.18 | 7.232221965 | 6.891185807 | 6.494061344 |
| CTSZ     | ENSG00000101160.13 | 9.515995316 | 9.849548322 | 6.256933001 |
| SF3B5    | ENSG00000169976.6  | 7.075106131 | 6.938341581 | 6.584077189 |
| SLC20A1  | ENSG00000144136.10 | 8.471350315 | 8.184520044 | 8.237427501 |
| RAD23A   | ENSG00000179262.9  | 7.784614401 | 7.002573678 | 7.527819888 |
| RNF181   | ENSG00000168894.9  | 6.670241562 | 6.79494012  | 6.252320704 |
| SMARCA4  | ENSG00000127616.17 | 7.589601047 | 6.324585032 | 6.721725454 |
| MMP14    | ENSG00000157227.12 | 6.296411121 | 9.206284651 | 8.075448612 |
| SRSF3    | ENSG00000112081.16 | 7.198303818 | 6.463780611 | 6.785356996 |
| FAM3C    | ENSG00000196937.10 | 7.465459964 | 6.658026491 | 6.240637758 |
| SELENON  | ENSG00000162430.16 | 7.645685172 | 7.603600894 | 6.983983657 |
| SUPT6H   | ENSG00000109111.14 | 6.851554069 | 6.953398796 | 6.761219519 |
| ESYT1    | ENSG00000139641.12 | 7.150737588 | 6.584925844 | 6.915743499 |
| GLS      | ENSG00000115419.12 | 6.199067768 | 6.748194233 | 7.700700166 |
| HAT1     | ENSG00000128708.12 | 6.489676287 | 6.573938107 | 6.795821539 |
| GFM1     | ENSG00000168827.14 | 6.482320023 | 6.224962191 | 6.436687352 |
| CPNE1    | ENSG00000214078.12 | 6.250099175 | 6.594987136 | 6.312148703 |
| MKKS     | ENSG00000125863.18 | 7.277136268 | 7.418766636 | 6.263884316 |
| HMG20B   | ENSG00000064961.18 | 7.610216494 | 8.453740408 | 8.914177797 |
| PMPCB    | ENSG00000105819.13 | 6.868354325 | 6.7479583   | 6.493497961 |
| PLS3     | ENSG00000102024.17 | 6.228706822 | 7.601387492 | 6.456965318 |
| ARPP19   | ENSG00000128989.10 | 7.023622387 | 6.433556114 | 6.805411034 |
| ATRAID   | ENSG00000138085.16 | 7.145210794 | 7.131178661 | 6.20656067  |
| AP3D1    | ENSG00000065000.15 | 6.423563146 | 7.513377181 | 7.244240467 |
| VDAC2    | ENSG00000165637.13 | 6.998602016 | 6.845548625 | 7.722467893 |
| POLR2G   | ENSG00000168002.11 | 7.481128773 | 6.26167905  | 6.871813359 |
| SRP72    | ENSG00000174780.15 | 7.518292153 | 6.354369404 | 6.493140175 |

|           |                    |             |             |             |
|-----------|--------------------|-------------|-------------|-------------|
| MGAT1     | ENSG00000131446.16 | 6.176843623 | 6.308925974 | 7.381125057 |
| CBX1      | ENSG00000108468.14 | 6.925143554 | 6.227851665 | 6.860283558 |
| TPP1      | ENSG00000166340.15 | 6.175981803 | 8.361939097 | 8.129603458 |
| PDCD5     | ENSG00000105185.11 | 7.531735237 | 6.638959713 | 6.207961031 |
| NCOR2     | ENSG00000196498.13 | 6.701889553 | 6.342919345 | 7.968224699 |
| RRP36     | ENSG00000124541.6  | 7.076951554 | 6.785290132 | 6.323692584 |
| CDC16     | ENSG00000130177.14 | 6.751230273 | 7.624123884 | 8.060053629 |
| THRAP3    | ENSG00000054118.13 | 7.454823549 | 6.71978238  | 6.251468353 |
| DDX39A    | ENSG00000123136.14 | 7.7340822   | 7.023959258 | 6.306799374 |
| CTBP1     | ENSG00000159692.15 | 7.335405182 | 6.320354509 | 7.895408736 |
| CKAP5     | ENSG00000175216.14 | 7.05089408  | 6.421277936 | 6.679807326 |
| MRPS34    | ENSG00000074071.14 | 7.310174651 | 6.691119675 | 6.646107787 |
| MRPS18A   | ENSG00000096080.11 | 6.399672153 | 6.237089972 | 6.292761833 |
| MRPS18B   | ENSG00000204568.11 | 6.806555793 | 6.188355962 | 6.881868613 |
| SEPHS2    | ENSG00000179918.18 | 7.188990173 | 6.180594231 | 7.82811691  |
| MZT2B     | ENSG00000152082.13 | 6.235611522 | 6.613481446 | 6.279084317 |
| LAMTOR4   | ENSG00000188186.10 | 6.437387751 | 7.40220124  | 6.293912128 |
| FKBP4     | ENSG00000004478.7  | 7.313675613 | 6.541474163 | 7.71892545  |
| ECHS1     | ENSG00000127884.4  | 7.466771042 | 6.562311789 | 6.186534551 |
| WBP2      | ENSG00000132471.11 | 6.4023373   | 7.866462761 | 8.692259284 |
| TOP2A     | ENSG00000131747.14 | 7.956827829 | 7.137985174 | 6.272075097 |
| NAMPT     | ENSG00000105835.11 | 6.186186212 | 7.045261858 | 7.46022402  |
| SLC1A5    | ENSG00000105281.12 | 8.395005419 | 6.806843298 | 11.44536568 |
| PTP4A1    | ENSG00000112245.10 | 7.742993289 | 8.99030886  | 8.362551138 |
| MT-TV     | ENSG00000210077.1  | 6.62251886  | 7.284497706 | 6.322766738 |
| SNF8      | ENSG00000159210.9  | 6.687978463 | 6.944604229 | 6.25735843  |
| FAM96A    | ENSG00000166797.10 | 7.084588222 | 6.615139376 | 6.234154925 |
| IMPDH1    | ENSG00000106348.16 | 6.333488673 | 7.183049315 | 6.21386405  |
| TMEM248   | ENSG00000106609.16 | 6.213346799 | 7.084679391 | 6.363475501 |
| SRSF11    | ENSG00000116754.13 | 6.880293876 | 6.360526192 | 6.172837662 |
| LTBR      | ENSG00000111321.10 | 6.925784932 | 7.013946664 | 7.375148557 |
| SNRPE     | ENSG00000182004.12 | 8.640579085 | 6.795735284 | 6.268525025 |
| ESYT2     | ENSG00000117868.15 | 6.282138855 | 6.789450244 | 7.788005171 |
| MMP24-AS1 | ENSG00000126005.16 | 6.206055868 | 7.107186541 | 7.163169854 |
| G6PD      | ENSG00000160211.15 | 7.057137639 | 6.380440223 | 6.467929873 |
| AHCYL1    | ENSG00000168710.17 | 6.526749295 | 7.953697315 | 6.44215134  |
| MRPL3     | ENSG00000114686.8  | 7.329512201 | 6.690196662 | 6.636356288 |
| C7orf50   | ENSG00000146540.14 | 6.228489436 | 6.761738842 | 6.669551043 |
| USP5      | ENSG00000111667.13 | 7.045166636 | 6.154544427 | 6.22467722  |
| UBXN4     | ENSG00000144224.16 | 6.236185663 | 6.649762874 | 6.897356749 |
| RAB10     | ENSG00000084733.10 | 7.035543611 | 7.062208725 | 6.137834947 |
| OGDH      | ENSG00000105953.14 | 6.432387033 | 6.641796259 | 6.785363447 |
| HSD17B10  | ENSG00000072506.12 | 7.865963456 | 7.513039841 | 6.199760039 |
| STARD3NL  | ENSG00000010270.13 | 6.195032419 | 7.316597829 | 6.156458028 |
| FAM120A   | ENSG00000048828.16 | 7.393250944 | 7.707946491 | 6.153070183 |
| EXT2      | ENSG00000151348.13 | 6.918054875 | 6.591484975 | 6.521534111 |

|         |                    |             |             |             |
|---------|--------------------|-------------|-------------|-------------|
| DNAJB6  | ENSG00000105993.14 | 6.86657711  | 6.456864811 | 6.616356315 |
| ATP5G1  | ENSG00000159199.13 | 7.265605151 | 7.518388176 | 6.183275696 |
| TMEM14C | ENSG00000111843.13 | 7.009328033 | 6.162083488 | 6.791600885 |
| PYURF   | ENSG00000145337.4  | 6.145776971 | 6.553436297 | 7.039309467 |
| NDUFA13 | ENSG00000186010.18 | 7.600268028 | 6.924111282 | 7.06391174  |
| POLR1D  | ENSG00000186184.16 | 7.183095808 | 6.804774557 | 7.243992886 |
| FH      | ENSG00000091483.6  | 7.924846406 | 6.154654178 | 6.899066942 |
| SRM     | ENSG00000116649.9  | 8.168857858 | 7.593136555 | 6.272707352 |
| NOP56   | ENSG00000101361.16 | 8.300379211 | 8.054449093 | 6.131595103 |
| NCBP2   | ENSG00000114503.10 | 6.405948733 | 7.392738003 | 6.541292458 |
| PEA15   | ENSG00000162734.12 | 7.029252885 | 7.030469872 | 6.186765146 |
| MTIF2   | ENSG00000085760.14 | 6.4562754   | 6.379968903 | 6.401846347 |
| SNX1    | ENSG00000028528.14 | 7.31758108  | 6.309785364 | 6.668683192 |
| NDUFS3  | ENSG00000213619.9  | 6.907290968 | 7.033071982 | 6.946458385 |
| UFC1    | ENSG00000143222.11 | 7.512119996 | 6.75481758  | 6.833094679 |
| FKBP1A  | ENSG00000088832.16 | 7.555181696 | 7.910902381 | 6.657069731 |
| UXT     | ENSG00000126756.11 | 7.2616081   | 6.652861363 | 6.164509691 |
| GGH     | ENSG00000137563.11 | 6.708038735 | 6.890138989 | 6.256128179 |
| FAM210B | ENSG00000124098.9  | 6.15535601  | 8.057413079 | 8.439022705 |
| TRAF7   | ENSG00000131653.12 | 7.301281445 | 6.594235485 | 6.505662944 |
| NAE1    | ENSG00000159593.14 | 7.284589733 | 6.207115823 | 6.50811827  |
| OCIAD1  | ENSG00000109180.14 | 7.387839824 | 6.502792875 | 7.866359547 |
| SNX2    | ENSG00000205302.6  | 6.616466924 | 6.20802433  | 6.397906127 |
| NPLOC4  | ENSG00000182446.13 | 6.781585836 | 7.314837159 | 7.111975482 |
| CUTA    | ENSG00000112514.15 | 6.436215296 | 6.449403315 | 6.949827174 |
| SEC31A  | ENSG00000138674.16 | 6.180060427 | 6.798549269 | 6.181699952 |
| ACO2    | ENSG00000100412.15 | 6.129601017 | 7.172602247 | 8.195054636 |
| SEPT7   | ENSG00000122545.18 | 6.946121061 | 8.02188021  | 6.243142561 |
| TNPO1   | ENSG00000083312.17 | 6.682263757 | 7.023627217 | 6.307877251 |
| DDX1    | ENSG00000079785.14 | 8.015391774 | 7.562841835 | 6.122400009 |
| MCM3    | ENSG00000112118.18 | 7.014458187 | 6.168158553 | 6.334493449 |
| DIAPH1  | ENSG00000131504.15 | 7.420675744 | 6.583930643 | 6.397306136 |
| ATP5L   | ENSG00000167283.7  | 7.056015254 | 6.294716853 | 7.122781883 |
| NME4    | ENSG00000103202.12 | 6.698417723 | 6.74949679  | 6.78399135  |
| NUCKS1  | ENSG00000069275.12 | 8.078176882 | 6.215872634 | 6.10089979  |
| NOC2L   | ENSG00000188976.10 | 8.178584413 | 7.382251741 | 6.160875893 |
| YIF1A   | ENSG00000174851.15 | 6.313172199 | 7.003249114 | 6.352888511 |
| ZNHIT1  | ENSG00000106400.11 | 6.958615883 | 7.277878926 | 6.241919302 |
| DAP3    | ENSG00000132676.15 | 7.704662357 | 7.466442871 | 6.378484197 |
| FDFT1   | ENSG00000079459.12 | 6.55604074  | 6.237690882 | 7.860102597 |
| NBR1    | ENSG00000188554.13 | 7.025529617 | 6.661810295 | 7.636963846 |
| GUSB    | ENSG00000169919.16 | 6.120455697 | 6.140427865 | 6.223718911 |
| ACTL6A  | ENSG00000136518.16 | 6.488152953 | 6.417522439 | 6.113712316 |
| MGST3   | ENSG00000143198.12 | 6.083835969 | 7.698652542 | 7.792639366 |
| GGCT    | ENSG00000006625.17 | 7.202770201 | 7.283329141 | 6.074935439 |
| SPCS3   | ENSG00000129128.12 | 6.842395912 | 6.12165015  | 6.390058318 |



|         |                    |             |             |             |
|---------|--------------------|-------------|-------------|-------------|
| AURKA   | ENSG00000087586.17 | 7.06629341  | 6.088775656 | 6.200441501 |
| MTHFD1  | ENSG00000100714.15 | 7.236267886 | 6.358748316 | 6.168271389 |
| LYPLA2  | ENSG00000011009.10 | 7.498322302 | 7.093252595 | 6.335363903 |
| CD47    | ENSG00000196776.14 | 6.495350769 | 6.496147564 | 6.143969508 |
| ARCN1   | ENSG00000095139.13 | 7.587921366 | 6.849699006 | 6.944934793 |
| RPL26L1 | ENSG00000037241.7  | 7.007879637 | 6.623660708 | 6.156737952 |
| ADD1    | ENSG00000087274.16 | 6.717250228 | 6.148127067 | 7.897870578 |
| RABGGTB | ENSG00000137955.15 | 7.25067434  | 6.39967407  | 6.590150936 |
| PPP6R1  | ENSG00000105063.18 | 7.131723418 | 6.093228985 | 7.477663442 |
| RAB11B  | ENSG00000185236.11 | 6.884709625 | 6.581626057 | 6.492915883 |
| CUL1    | ENSG00000055130.15 | 6.492193015 | 6.733557803 | 6.254750786 |
| TTC1    | ENSG00000113312.10 | 7.204532801 | 6.326163845 | 6.507193746 |
| IMP4    | ENSG00000136718.9  | 6.58981416  | 6.608811317 | 6.280432591 |
| TXNDC5  | ENSG00000239264.8  | 7.846095581 | 7.197046668 | 7.676269334 |
| ARIH2   | ENSG00000177479.19 | 6.843441225 | 6.715016557 | 6.081463237 |
| ABR     | ENSG00000159842.14 | 6.384086018 | 6.233270298 | 7.429783612 |
| NAXE    | ENSG00000163382.11 | 7.237386004 | 7.687344677 | 6.63873222  |
| CDC123  | ENSG00000151465.13 | 7.706902327 | 6.87065426  | 6.165286313 |
| TMEM258 | ENSG00000134825.15 | 7.657224767 | 6.300644392 | 6.11154066  |
| PPP1R9B | ENSG00000108819.10 | 6.449089471 | 6.556294529 | 6.641075312 |
| CEBPZOS | ENSG00000218739.9  | 6.602060467 | 6.511936382 | 6.205421831 |
| BOLA3   | ENSG00000163170.11 | 6.569636642 | 6.659073349 | 6.147815092 |
| API5    | ENSG00000166181.12 | 6.888381331 | 6.751925867 | 6.383230315 |
| TMED7   | ENSG00000134970.13 | 6.918361763 | 6.373075623 | 6.54781927  |
| SSFA2   | ENSG00000138434.16 | 7.066741271 | 6.218005066 | 6.07885584  |
| UQCR10  | ENSG00000184076.13 | 6.39272998  | 6.986493439 | 7.624283462 |
| PFKM    | ENSG00000152556.15 | 6.720506312 | 7.13059284  | 7.188073267 |
| NAA20   | ENSG00000173418.11 | 7.533693347 | 6.868242001 | 6.146929804 |
| PRR11   | ENSG00000068489.12 | 7.021934732 | 6.394655936 | 6.664915381 |
| GSTK1   | ENSG00000197448.13 | 6.451039326 | 7.196313068 | 6.500316112 |
| DEGS1   | ENSG00000143753.12 | 6.790850013 | 6.064963685 | 6.126113899 |
| LIPA    | ENSG00000107798.17 | 6.123752008 | 6.587359806 | 6.649143416 |
| SRPK2   | ENSG00000135250.16 | 6.204283551 | 6.827933483 | 6.198486221 |
| TIMP3   | ENSG00000100234.11 | 9.639464253 | 7.478246248 | 6.086285859 |
| BLOC1S1 | ENSG00000135441.7  | 6.711957637 | 6.468898631 | 6.15180073  |
| NRBP1   | ENSG00000115216.13 | 6.707867586 | 6.395671522 | 6.050620748 |
| ZFAS1   | ENSG00000177410.12 | 7.210940641 | 6.940430518 | 7.641322422 |
| ANAPC11 | ENSG00000141552.17 | 6.518656938 | 6.515590285 | 6.887137203 |
| NCSTN   | ENSG00000162736.15 | 6.959893948 | 7.293269979 | 6.049668495 |
| LYPLA1  | ENSG00000120992.17 | 6.767619813 | 6.176434004 | 6.516853436 |
| AP3S1   | ENSG00000177879.15 | 6.330209404 | 6.382724427 | 6.383723637 |
| ERLEC1  | ENSG00000068912.13 | 6.720018608 | 6.722471208 | 6.099886231 |
| TXLNA   | ENSG00000084652.15 | 6.448027668 | 6.138432753 | 6.368122516 |
| NDUFB3  | ENSG00000119013.8  | 6.230076942 | 7.327913202 | 7.114187466 |
| CAPZA1  | ENSG00000116489.12 | 7.634765457 | 6.712857583 | 6.331660922 |
| YTHDF1  | ENSG00000149658.17 | 6.272120436 | 6.091021684 | 6.510752754 |

|         |                    |             |             |             |
|---------|--------------------|-------------|-------------|-------------|
| SRRT    | ENSG00000087087.19 | 7.157759244 | 6.841036638 | 6.267472304 |
| HIBADH  | ENSG00000106049.8  | 6.060294831 | 6.910746902 | 6.315253909 |
| HDAC1   | ENSG00000116478.11 | 7.695862095 | 7.358134413 | 6.120132817 |
| BRD2    | ENSG00000204256.12 | 6.680516324 | 6.612043566 | 6.334583402 |
| SLC25A1 | ENSG00000100075.9  | 6.567135399 | 6.579130451 | 6.059867429 |
| COX7B   | ENSG00000131174.4  | 6.146750465 | 6.412531204 | 6.175521589 |
| ZRANB2  | ENSG00000132485.13 | 7.051985267 | 6.678935224 | 6.185071975 |
| FLII    | ENSG00000177731.15 | 6.745188393 | 6.508965661 | 6.194897629 |
| TSPAN4  | ENSG00000214063.10 | 6.156974744 | 7.366186585 | 7.531875175 |
| MYO1C   | ENSG00000197879.14 | 6.860998992 | 6.178551745 | 6.404770337 |
| TYMS    | ENSG00000176890.15 | 7.897383504 | 7.359655181 | 6.297735703 |
| MAP4K4  | ENSG00000071054.16 | 6.461470489 | 6.165819858 | 6.929150971 |
| TOMM34  | ENSG00000025772.7  | 7.301924309 | 6.14798412  | 6.992736585 |
| LAPTM4B | ENSG00000104341.16 | 7.18983663  | 6.325323453 | 6.175069252 |
| NDUFC2  | ENSG00000151366.12 | 6.605162993 | 6.490915615 | 6.228704685 |
| TAF7    | ENSG00000178913.7  | 7.510108271 | 6.096167034 | 7.490905139 |
| VBP1    | ENSG00000155959.10 | 6.844323338 | 6.593652861 | 6.266503749 |
| NOMO1   | ENSG00000103512.14 | 6.478312652 | 6.259744082 | 6.528678346 |
| ZMAT2   | ENSG00000146007.10 | 6.844130099 | 6.419675508 | 6.049766668 |
| CSNK1A1 | ENSG00000113712.17 | 6.938770364 | 6.254843756 | 6.610348121 |
| SPTAN1  | ENSG00000197694.15 | 7.138492789 | 7.01153158  | 6.090048654 |
| COP5    | ENSG00000121022.13 | 7.321963367 | 6.086196328 | 6.348677649 |
| CSNK2A1 | ENSG00000101266.17 | 7.311370329 | 7.036201675 | 6.137594419 |
| FAM32A  | ENSG00000105058.11 | 7.766824409 | 6.73833267  | 6.248263282 |
| CUL4A   | ENSG00000139842.14 | 7.357285878 | 6.558036535 | 6.029203749 |
| EIF4A3  | ENSG00000141543.9  | 7.141591066 | 7.324254591 | 6.093447628 |
| IDH3G   | ENSG00000067829.18 | 6.390093621 | 6.670461154 | 6.452548538 |
| SMIM26  | ENSG00000232388.4  | 7.058490587 | 6.377843858 | 6.010020276 |
| SF3A2   | ENSG00000104897.9  | 7.024312668 | 6.380843454 | 6.234895209 |
| CAPN2   | ENSG00000162909.17 | 7.754202842 | 6.396914278 | 6.694867832 |
| EIF3J   | ENSG00000104131.12 | 7.162909132 | 6.763529537 | 6.513677399 |
| PSMD11  | ENSG00000108671.9  | 7.303456401 | 6.920846641 | 6.84586435  |
| GNL3    | ENSG00000163938.16 | 7.753036876 | 7.045700986 | 6.136331786 |
| CBR1    | ENSG00000159228.12 | 6.926178781 | 7.771755711 | 6.144937524 |
| RABL6   | ENSG00000196642.18 | 6.108732939 | 6.90324943  | 6.81735421  |
| FANCI   | ENSG00000140525.17 | 6.806080583 | 6.110254272 | 6.025075918 |
| FARSA   | ENSG00000179115.10 | 8.440569592 | 6.561469825 | 6.059453276 |
| BZW2    | ENSG00000136261.14 | 7.645010593 | 7.331762732 | 6.071914599 |
| BCAS2   | ENSG00000116752.5  | 6.757216311 | 6.417941033 | 5.996841839 |
| TAGLN2  | ENSG00000158710.14 | 9.658615377 | 7.310280584 | 6.095188264 |
| LAMB2   | ENSG00000172037.13 | 6.446246175 | 7.155405052 | 6.343625571 |
| TOMM70  | ENSG00000154174.7  | 6.965743811 | 6.452914717 | 6.272224284 |
| TIMM17A | ENSG00000134375.10 | 6.914661559 | 7.034416322 | 6.018871482 |
| GSR     | ENSG00000104687.12 | 6.019386141 | 6.47162558  | 6.335934833 |
| RSL1D1  | ENSG00000171490.12 | 7.418499746 | 6.220214772 | 6.901604712 |
| DNAJC5  | ENSG00000101152.10 | 6.068622826 | 6.127317047 | 6.653689129 |

|          |                    |             |             |             |
|----------|--------------------|-------------|-------------|-------------|
| DDX42    | ENSG00000198231.12 | 6.444007907 | 6.792951469 | 6.783359233 |
| EMP3     | ENSG00000142227.10 | 7.234287907 | 6.95607808  | 6.206335428 |
| SCPEP1   | ENSG00000121064.12 | 6.175727275 | 7.613405751 | 6.187056006 |
| DDX18    | ENSG00000088205.12 | 6.859207165 | 6.550777832 | 6.09196999  |
| UBE2E1   | ENSG00000170142.11 | 7.679115234 | 7.571503765 | 7.764795859 |
| ATP2C1   | ENSG00000017260.19 | 6.07744163  | 6.59488824  | 6.059467977 |
| NDUFA12  | ENSG00000184752.12 | 6.738047166 | 6.340757317 | 6.186811895 |
| TCOF1    | ENSG00000070814.17 | 7.49700838  | 6.187532376 | 6.120215389 |
| STAT6    | ENSG00000166888.11 | 6.380983508 | 7.113646335 | 6.069481331 |
| RTCB     | ENSG00000100220.11 | 6.570102416 | 7.332016625 | 6.803623217 |
| TMEM165  | ENSG00000134851.12 | 6.738946771 | 6.602375543 | 6.165216982 |
| SAP18    | ENSG00000150459.12 | 6.795689592 | 6.116788372 | 6.180135031 |
| MAP3K11  | ENSG00000173327.7  | 6.199959171 | 6.887325621 | 6.675075666 |
| RBM42    | ENSG00000126254.11 | 6.726105575 | 7.414104409 | 6.562114221 |
| DLST     | ENSG00000119689.14 | 6.706164775 | 6.12021334  | 6.581333061 |
| MRPL13   | ENSG00000172172.7  | 7.037902277 | 6.473729632 | 6.086968545 |
| MOB1A    | ENSG00000114978.17 | 6.706002203 | 6.786731118 | 6.042006479 |
| TMEM106C | ENSG00000134291.11 | 6.940276913 | 6.218250044 | 6.548049191 |
| TAF6     | ENSG00000106290.14 | 6.221174148 | 6.729131764 | 5.982584386 |
| XPOT     | ENSG00000184575.11 | 7.423050243 | 6.552198717 | 7.664907944 |
| PPP6R3   | ENSG00000110075.14 | 6.403279301 | 6.045521498 | 6.254061735 |
| SURF4    | ENSG00000148248.13 | 7.392802627 | 8.554800297 | 6.313483438 |
| PAPOLA   | ENSG00000090060.17 | 7.149713014 | 6.911872068 | 6.070342957 |
| UBE2V1   | ENSG00000244687.11 | 7.74557821  | 7.182597298 | 7.915798811 |
| UBR4     | ENSG00000127481.14 | 6.144406227 | 6.478334056 | 6.097514463 |
| PGRMC1   | ENSG00000101856.9  | 6.417694405 | 6.78168284  | 6.011985309 |
| SRI      | ENSG00000075142.13 | 6.832277582 | 7.00083026  | 6.102229449 |
| SUPT16H  | ENSG00000092201.9  | 7.66851879  | 6.337096097 | 5.993803085 |
| FAM129B  | ENSG00000136830.11 | 7.721561751 | 7.351427665 | 6.036160571 |
| PPIF     | ENSG00000108179.13 | 7.330337799 | 6.097039488 | 6.326678899 |
| NUP98    | ENSG00000110713.15 | 6.040163722 | 6.471024737 | 6.133980833 |
| CTDNEP1  | ENSG00000175826.11 | 7.389408083 | 6.223750506 | 6.279855124 |
| POMGNT1  | ENSG00000085998.13 | 6.547256684 | 6.365941587 | 6.26922122  |
| EIF3M    | ENSG00000149100.12 | 7.534016329 | 6.88021955  | 7.207660526 |
| XPO7     | ENSG00000130227.16 | 6.123787955 | 5.982773799 | 6.332201052 |
| GTF2F1   | ENSG00000125651.13 | 7.232187244 | 6.159221202 | 6.426432099 |
| PPP2CB   | ENSG00000104695.12 | 5.977817476 | 6.396737425 | 6.915342198 |
| TRA2B    | ENSG00000136527.17 | 6.782734078 | 6.009892688 | 6.07101198  |
| AFG3L2   | ENSG00000141385.9  | 6.519789615 | 7.187457619 | 6.347220111 |
| SFXN3    | ENSG00000107819.13 | 6.734167146 | 6.169201081 | 6.764133657 |
| PON2     | ENSG00000105854.12 | 6.031772797 | 7.39221813  | 6.099574597 |
| PLAT     | ENSG00000104368.17 | 7.048913089 | 7.574703379 | 6.34990318  |
| CD59     | ENSG00000085063.14 | 6.802089471 | 8.311743551 | 8.440591108 |
| PNRC2    | ENSG00000189266.11 | 6.588972752 | 6.110298551 | 6.003923565 |
| EFHD2    | ENSG00000142634.12 | 6.701879465 | 7.157828424 | 6.136415063 |
| YME1L1   | ENSG00000136758.18 | 7.164765322 | 6.522536896 | 6.254616586 |

|          |                    |             |             |             |
|----------|--------------------|-------------|-------------|-------------|
| DUT      | ENSG00000128951.13 | 6.732409942 | 6.291237292 | 6.428247584 |
| XPO6     | ENSG00000169180.11 | 6.827415042 | 6.564252754 | 6.142590604 |
| GUK1     | ENSG00000143774.16 | 6.980038526 | 6.319769628 | 6.088872715 |
| MPV17    | ENSG00000115204.14 | 6.725775081 | 6.607185581 | 6.033764829 |
| NAA10    | ENSG00000102030.15 | 7.453731656 | 7.606017009 | 6.369677438 |
| USP14    | ENSG00000101557.14 | 6.38981297  | 6.926933773 | 6.197310359 |
| PAIP2    | ENSG00000120727.12 | 7.349172396 | 6.574701151 | 6.781159982 |
| ATP6V1B2 | ENSG00000147416.10 | 5.991759506 | 7.055709168 | 6.977163379 |
| H2AFX    | ENSG00000188486.3  | 8.021228917 | 5.956029204 | 6.118851539 |
| WDR61    | ENSG00000140395.8  | 6.391399563 | 7.086476613 | 6.093052822 |
| GBA      | ENSG00000177628.15 | 6.559293284 | 8.084586015 | 6.0226504   |
| PSMA5    | ENSG00000143106.12 | 7.353244615 | 6.521934777 | 6.041820484 |
| WBP11    | ENSG00000084463.7  | 6.906543766 | 6.595579942 | 5.965371945 |
| APRT     | ENSG00000198931.10 | 7.347107496 | 6.722611639 | 6.706710608 |
| TLN1     | ENSG00000137076.20 | 7.209021006 | 6.356930871 | 6.147979994 |
| UPF1     | ENSG00000005007.12 | 6.884938798 | 6.241460897 | 6.064375337 |
| TRAPPC1  | ENSG00000170043.11 | 6.92333724  | 6.398788024 | 6.094939601 |
| CGGBP1   | ENSG00000163320.10 | 6.440886183 | 6.747666724 | 6.037877033 |
| TRAP1    | ENSG00000126602.10 | 7.593047726 | 6.589264129 | 6.863012319 |
| MLX      | ENSG00000108788.11 | 6.900597133 | 6.68892841  | 6.887120922 |
| SNX3     | ENSG00000112335.14 | 6.802965395 | 6.612589533 | 6.549170281 |
| POLR2C   | ENSG00000102978.12 | 7.321649806 | 5.991197182 | 6.042076123 |
| SNORD58B | ENSG00000271982.1  | 6.812850169 | 7.151770129 | 6.76178293  |
| FBXW5    | ENSG00000159069.13 | 6.583105448 | 7.524206065 | 7.725892885 |
| ALG3     | ENSG00000214160.9  | 6.520795221 | 7.076941963 | 5.991267442 |
| SGK1     | ENSG00000118515.11 | 6.651244417 | 8.094638803 | 6.241467632 |
| SRSF5    | ENSG00000100650.15 | 6.554900001 | 6.38875982  | 6.132315367 |
| OSBPL9   | ENSG00000117859.18 | 6.068622931 | 6.858689136 | 6.638642264 |
| PAFAH1B2 | ENSG00000168092.13 | 7.090643879 | 5.969815409 | 6.696217386 |
| ITGB1BP1 | ENSG00000119185.12 | 6.168253287 | 5.946147912 | 6.096798598 |
| PAFAH1B1 | ENSG00000007168.12 | 6.530378671 | 5.969083856 | 6.407005994 |
| YIPF3    | ENSG00000137207.11 | 6.396827899 | 6.719974962 | 6.869521177 |
| PLOD1    | ENSG00000083444.16 | 7.798727246 | 7.953094476 | 5.956513842 |
| UBE2D2   | ENSG00000131508.15 | 6.771998012 | 6.297055847 | 6.824898205 |
| CDK2AP1  | ENSG00000111328.6  | 7.411262549 | 7.06368443  | 6.140308396 |
| MRPL28   | ENSG00000086504.15 | 7.117973183 | 6.273095207 | 6.187553818 |
| GATAD2A  | ENSG00000167491.17 | 6.494184782 | 6.870209674 | 6.626054595 |
| ELOF1    | ENSG00000130165.10 | 7.69196498  | 6.327154093 | 6.040721181 |
| CCNB1    | ENSG00000134057.14 | 7.982485853 | 6.115722251 | 6.233147253 |
| SCARB2   | ENSG00000138760.9  | 6.294273411 | 7.537946079 | 7.065788778 |
| ETS1     | ENSG00000134954.14 | 5.926406654 | 6.650658187 | 6.32171613  |
| CSNK2A2  | ENSG00000070770.8  | 7.069540022 | 6.003924088 | 6.587336259 |
| NDUFB5   | ENSG00000136521.12 | 5.977952643 | 6.82359815  | 7.259667682 |
| CDC27    | ENSG00000004897.11 | 6.694961328 | 6.416407441 | 6.302541653 |
| ATP13A3  | ENSG00000133657.14 | 6.588649813 | 6.620262653 | 6.474691042 |
| GYPC     | ENSG00000136732.14 | 6.005979029 | 9.444807228 | 9.002684495 |

|          |                    |             |             |             |
|----------|--------------------|-------------|-------------|-------------|
| H2AFY    | ENSG00000113648.16 | 7.197900271 | 5.963091146 | 6.5153793   |
| SRP68    | ENSG00000167881.14 | 6.326769352 | 6.017698429 | 6.531253774 |
| SHISA5   | ENSG00000164054.15 | 7.326090283 | 7.520344872 | 6.521474039 |
| COA4     | ENSG00000181924.6  | 7.421478514 | 6.591259604 | 6.496040852 |
| ANP32A   | ENSG00000140350.15 | 7.395253227 | 7.111384428 | 6.103807874 |
| ANKRD10  | ENSG00000088448.14 | 7.131574876 | 6.014897614 | 6.2169907   |
| SMARCC2  | ENSG00000139613.11 | 6.768621596 | 6.3442449   | 6.114054372 |
| CYB5R3   | ENSG00000100243.20 | 5.945265971 | 6.448900677 | 7.005040344 |
| CLNS1A   | ENSG00000074201.8  | 7.681529858 | 6.222464025 | 6.4481537   |
| ELOC     | ENSG00000154582.16 | 7.323781565 | 7.020624976 | 6.497478678 |
| TADA3    | ENSG00000171148.13 | 6.774411533 | 6.652756057 | 6.379238896 |
| ATP5G3   | ENSG00000154518.9  | 6.078971833 | 6.851672617 | 6.914279843 |
| FLOT1    | ENSG00000137312.14 | 6.058304807 | 6.869529806 | 8.585695676 |
| UBE2L6   | ENSG00000156587.15 | 6.665590836 | 6.260309598 | 5.952406347 |
| RAB6A    | ENSG00000175582.19 | 6.493025077 | 6.383354296 | 7.288299692 |
| JTB      | ENSG00000143543.14 | 7.260320793 | 7.086291468 | 6.809018316 |
| ZMPSTE24 | ENSG00000084073.8  | 6.969784925 | 6.742301745 | 5.933660259 |
| ETFA     | ENSG00000140374.15 | 7.008101469 | 7.042084153 | 6.922717617 |
| EXOC7    | ENSG00000182473.21 | 6.337206273 | 6.55366302  | 6.774049052 |
| DCTN2    | ENSG00000175203.15 | 6.681844678 | 6.626187986 | 8.717458557 |
| BECN1    | ENSG00000126581.12 | 6.859354439 | 7.054894725 | 6.848402129 |
| CDV3     | ENSG00000091527.15 | 6.638527395 | 6.405568125 | 6.293544333 |
| SPRY2    | ENSG00000136158.11 | 8.009109979 | 6.484817629 | 7.667221093 |
| CIB1     | ENSG00000185043.10 | 6.030578072 | 6.344324945 | 6.02482823  |
| FIBP     | ENSG00000172500.12 | 7.771465558 | 6.180873835 | 6.219236268 |
| ARHGEF1  | ENSG00000076928.17 | 7.315383865 | 7.303760791 | 6.56927591  |
| VPS29    | ENSG00000111237.18 | 6.532578738 | 6.981679024 | 6.001008283 |
| SPAG9    | ENSG00000008294.20 | 6.137803197 | 6.727312782 | 7.185164392 |
| TMEM214  | ENSG00000119777.18 | 6.753068234 | 7.533744334 | 6.008300178 |
| RNF11    | ENSG00000123091.4  | 6.009326448 | 5.952214518 | 6.572743468 |
| UNC45A   | ENSG00000140553.17 | 6.075175318 | 6.466107668 | 6.467664151 |
| THOC7    | ENSG00000163634.11 | 7.204466261 | 6.965473756 | 6.359437463 |
| PLCG1    | ENSG00000124181.14 | 6.040903917 | 6.088020273 | 7.115245719 |
| EIF2AK1  | ENSG00000086232.12 | 6.244897074 | 7.081980148 | 5.934210217 |
| OSTC     | ENSG00000198856.12 | 6.973111157 | 7.273908332 | 6.111018777 |
| SLC35A4  | ENSG00000176087.14 | 6.799149802 | 6.167029164 | 6.095218324 |
| REEP5    | ENSG00000129625.12 | 6.077051262 | 5.949234795 | 5.973679614 |
| ACAT1    | ENSG00000075239.13 | 6.567132779 | 5.990163062 | 6.795760199 |
| TNPO2    | ENSG00000105576.15 | 6.831770222 | 6.122897491 | 6.010160422 |
| MRPL16   | ENSG00000166902.4  | 7.298590057 | 6.576853989 | 5.881870276 |
| COX17    | ENSG00000138495.6  | 6.819435619 | 6.115990423 | 7.000602889 |
| SUN1     | ENSG00000164828.17 | 6.102163893 | 6.450777301 | 6.521624351 |
| HSF1     | ENSG00000185122.10 | 6.372505498 | 6.551355437 | 6.558429234 |
| VPS4A    | ENSG00000132612.15 | 6.375523119 | 5.913071798 | 6.627877567 |
| TIMM23   | ENSG00000265354.3  | 7.351493122 | 6.40248852  | 6.788886085 |
| BNIP2    | ENSG00000140299.11 | 6.230948195 | 6.926815732 | 6.759864164 |

|           |                    |             |             |             |
|-----------|--------------------|-------------|-------------|-------------|
| ZC3H13    | ENSG00000123200.16 | 6.590883203 | 6.770537688 | 8.968621593 |
| SMARCC1   | ENSG00000173473.10 | 7.203354999 | 6.405653303 | 5.981209113 |
| PSMC6     | ENSG00000100519.11 | 6.448238286 | 6.127577922 | 6.117749876 |
| ZDHHC5    | ENSG00000156599.10 | 6.445253698 | 6.375857918 | 6.882637394 |
| C5orf15   | ENSG00000113583.7  | 7.103512902 | 6.326882719 | 5.892289965 |
| DPY30     | ENSG00000162961.13 | 6.678196923 | 6.452569325 | 5.961307653 |
| DDX3X     | ENSG00000215301.9  | 7.422590343 | 6.11890401  | 6.395134202 |
| RAP1B     | ENSG00000127314.17 | 7.029082651 | 7.246896545 | 6.093013918 |
| SPATS2L   | ENSG00000196141.13 | 7.84530043  | 5.973666391 | 6.770199491 |
| APH1A     | ENSG00000117362.12 | 7.190934293 | 7.775201017 | 5.984784856 |
| MCTS1     | ENSG00000232119.7  | 7.362437805 | 6.313650892 | 6.584538969 |
| CTNBL1    | ENSG00000132792.18 | 6.148041729 | 6.069724767 | 6.266843499 |
| BABAM1    | ENSG00000105393.15 | 7.895719659 | 7.336686711 | 6.016034    |
| CHPT1     | ENSG00000111666.10 | 6.777615915 | 6.379242652 | 6.209970094 |
| DHX30     | ENSG00000132153.14 | 6.969907875 | 6.652487422 | 5.902999675 |
| MFF       | ENSG00000168958.19 | 6.061980701 | 6.68350527  | 6.360691744 |
| PDHA1     | ENSG00000131828.13 | 6.347206266 | 5.891372366 | 6.882009572 |
| POLR2E    | ENSG00000099817.11 | 6.006826693 | 7.369836834 | 6.517054783 |
| CCDC86    | ENSG00000110104.11 | 6.799168286 | 5.921284961 | 6.110441469 |
| PABPN1    | ENSG00000100836.10 | 6.685898507 | 6.090714326 | 5.983094869 |
| GYG1      | ENSG00000163754.17 | 6.135738561 | 5.920624087 | 6.32798938  |
| ATP13A2   | ENSG00000159363.17 | 6.099168543 | 6.983618748 | 7.354511146 |
| CHD3      | ENSG00000170004.16 | 6.502613462 | 5.976245075 | 5.95980763  |
| NUP205    | ENSG00000155561.14 | 6.524522024 | 6.70284598  | 5.876014665 |
| PSMB8     | ENSG00000204264.8  | 6.325886717 | 5.907966151 | 6.10999001  |
| MRPL47    | ENSG00000136522.13 | 6.521175976 | 6.110749614 | 5.937582401 |
| SELENOW   | ENSG00000178980.14 | 6.863081451 | 6.112858679 | 6.416636082 |
| TIMM10    | ENSG00000134809.8  | 6.680146652 | 6.379647731 | 5.878053133 |
| UROD      | ENSG00000126088.13 | 6.578511749 | 6.290042672 | 5.913237934 |
| UFD1      | ENSG00000070010.18 | 6.008099755 | 6.458070394 | 5.887679368 |
| CCNG1     | ENSG00000113328.18 | 6.579686683 | 6.369838307 | 7.594574508 |
| BACE2     | ENSG00000182240.15 | 6.384664595 | 7.849464147 | 7.478299525 |
| TXNRD1    | ENSG00000198431.15 | 8.130106475 | 7.321207462 | 6.321406981 |
| SLC38A10  | ENSG00000157637.12 | 5.944641964 | 7.582177468 | 7.412784875 |
| HSD17B12  | ENSG00000149084.12 | 6.489875286 | 7.343432324 | 7.14601804  |
| ADH5      | ENSG00000197894.10 | 7.026134476 | 6.766786181 | 6.116825787 |
| WDR43     | ENSG00000163811.11 | 6.735259922 | 6.612374083 | 5.886279096 |
| FKBP3     | ENSG00000100442.10 | 6.743251413 | 6.176062592 | 6.056345393 |
| POLR2A    | ENSG00000181222.15 | 7.581169045 | 5.862827031 | 6.297926986 |
| PITRM1    | ENSG00000107959.15 | 6.200194363 | 5.945507355 | 7.373629295 |
| TAPBP     | ENSG00000231925.11 | 5.905195736 | 6.64778946  | 6.636468945 |
| PFDN6     | ENSG00000204220.11 | 7.205846185 | 6.712656035 | 5.894518447 |
| PSME1     | ENSG00000092010.14 | 6.96381281  | 5.930586999 | 6.69176116  |
| RNF10     | ENSG00000022840.15 | 6.303470776 | 6.142358393 | 7.871524932 |
| BZW1      | ENSG00000082153.17 | 6.503507213 | 6.837088394 | 6.226660818 |
| GABARAPL2 | ENSG00000034713.7  | 7.496816975 | 6.956379111 | 7.984611631 |

|          |                    |             |             |             |
|----------|--------------------|-------------|-------------|-------------|
| CYP51A1  | ENSG00000001630.15 | 5.87632566  | 7.656164142 | 7.095582889 |
| COX7A2L  | ENSG00000115944.14 | 6.387514675 | 6.097497358 | 6.821418937 |
| CAT      | ENSG00000121691.4  | 6.761846889 | 6.702084868 | 6.775136041 |
| RNH1     | ENSG00000023191.16 | 6.139871307 | 6.447257182 | 6.955407919 |
| CS       | ENSG00000062485.18 | 6.35881972  | 5.916374359 | 7.282371285 |
| H1FX     | ENSG00000184897.5  | 8.235435775 | 6.030829887 | 7.185045715 |
| TM9SF3   | ENSG00000077147.14 | 7.427885409 | 6.058636348 | 7.016163141 |
| EDEM2    | ENSG00000088298.12 | 5.870264818 | 6.280930532 | 5.868208095 |
| CREG1    | ENSG00000143162.7  | 6.89290968  | 7.426019302 | 5.886991462 |
| WDR82    | ENSG00000164091.11 | 6.905933261 | 6.299419843 | 5.837258315 |
| MRPS30   | ENSG00000112996.10 | 7.449304846 | 7.141936111 | 7.318327521 |
| LAMTOR2  | ENSG00000116586.11 | 7.083938337 | 6.995928232 | 5.860283949 |
| BUB3     | ENSG00000154473.17 | 7.703776957 | 6.149792333 | 5.9184373   |
| HEXA     | ENSG00000213614.9  | 5.947492694 | 7.354885833 | 7.173567773 |
| ABRACL   | ENSG00000146386.7  | 6.032371496 | 7.043028691 | 5.847616875 |
| POFUT1   | ENSG00000101346.13 | 6.42065741  | 6.028109748 | 5.87364606  |
| EIF2AK4  | ENSG00000128829.11 | 6.169457521 | 6.537384905 | 5.863511961 |
| RIPOR1   | ENSG00000039523.19 | 6.314242225 | 5.866248502 | 6.880154591 |
| FNBP4    | ENSG00000109920.12 | 6.549309213 | 6.294373987 | 6.784022979 |
| RNASEK   | ENSG00000219200.11 | 6.195889454 | 6.802901335 | 6.881603575 |
| NRP2     | ENSG00000118257.16 | 7.30195814  | 6.698362469 | 6.083744664 |
| STOM     | ENSG00000148175.12 | 7.703348746 | 8.094026791 | 6.201281944 |
| HMGXB3   | ENSG00000113716.12 | 5.837479167 | 6.021644958 | 6.461586314 |
| STAT3    | ENSG00000168610.14 | 6.430845644 | 6.129890082 | 6.085983947 |
| SNX5     | ENSG00000089006.16 | 8.046892461 | 6.740400485 | 5.921645543 |
| MRPS5    | ENSG00000144029.11 | 5.8577114   | 7.224669624 | 6.8228904   |
| NIFK     | ENSG00000155438.11 | 6.131277874 | 6.596633643 | 6.157177727 |
| EXOSC10  | ENSG00000171824.13 | 6.551388655 | 6.656375977 | 5.829860348 |
| NBL1     | ENSG00000158747.13 | 5.880439381 | 7.639666685 | 8.880022348 |
| CNOT11   | ENSG00000158435.7  | 5.83542215  | 6.397071361 | 6.352774102 |
| GCN1     | ENSG00000089154.10 | 6.912827452 | 6.215461822 | 6.590054706 |
| ZMYND8   | ENSG00000101040.19 | 6.817979182 | 6.275558302 | 5.832354925 |
| TRAPPC3  | ENSG00000054116.11 | 6.118800781 | 6.190419252 | 5.848822079 |
| COLGALT1 | ENSG00000130309.10 | 7.67024811  | 7.883237245 | 5.864102712 |
| POM121C  | ENSG00000272391.5  | 6.446822231 | 6.578885426 | 6.305593324 |
| NDUFA3   | ENSG00000170906.15 | 5.955506763 | 6.132114071 | 6.696850971 |
| SH3KBP1  | ENSG00000147010.17 | 7.185196004 | 5.942417482 | 7.405052666 |
| TUBG1    | ENSG00000131462.7  | 7.408719162 | 6.878106534 | 5.848129207 |
| UHMK1    | ENSG00000152332.15 | 6.434132274 | 6.586570254 | 6.560755034 |
| TSR3     | ENSG00000007520.3  | 6.448731631 | 6.278922979 | 5.987131278 |
| ABHD12   | ENSG00000100997.18 | 6.341426936 | 6.915906375 | 5.839499976 |
| BHLHE40  | ENSG00000134107.4  | 5.79468118  | 6.764450706 | 7.67532083  |
| EIF2A    | ENSG00000144895.11 | 7.55084124  | 6.768279294 | 7.202267788 |
| SNHG1    | ENSG00000255717.6  | 7.053807439 | 6.066270223 | 6.205171772 |
| SDCBP    | ENSG00000137575.11 | 6.244767029 | 7.524905458 | 8.286188725 |
| DROSHA   | ENSG00000113360.16 | 6.863756089 | 6.103730268 | 6.084371611 |

|          |                    |             |             |             |
|----------|--------------------|-------------|-------------|-------------|
| MRPL18   | ENSG00000112110.9  | 7.006236118 | 6.300885445 | 5.836763496 |
| DCTD     | ENSG00000129187.14 | 6.744510596 | 6.015262608 | 6.047994602 |
| CPSF1    | ENSG00000071894.16 | 5.871311976 | 6.267829566 | 6.518433633 |
| USP39    | ENSG00000168883.19 | 6.452344686 | 6.826098188 | 5.788073455 |
| CSK      | ENSG00000103653.16 | 6.827395727 | 6.611656431 | 5.97645693  |
| UBE2G2   | ENSG00000184787.18 | 6.405876513 | 6.029308574 | 6.292418589 |
| GOLPH3   | ENSG00000113384.13 | 6.755412257 | 6.708594825 | 7.049124339 |
| DNMT1    | ENSG00000130816.14 | 7.635263308 | 5.986941365 | 5.927235732 |
| PNKD     | ENSG00000127838.13 | 5.865209514 | 6.987837295 | 6.353871714 |
| LSM14B   | ENSG00000149657.19 | 6.067569989 | 5.864742273 | 6.840556968 |
| COMMD4   | ENSG00000140365.15 | 6.611733102 | 6.268154091 | 6.022126767 |
| BLVRA    | ENSG00000106605.10 | 5.817105915 | 6.866582227 | 8.062723602 |
| UBE2H    | ENSG00000186591.11 | 5.901268374 | 7.142622276 | 7.013401711 |
| NGRN     | ENSG00000182768.8  | 6.017143047 | 6.133799923 | 6.45876765  |
| MYH10    | ENSG00000133026.12 | 6.989152759 | 6.738407945 | 6.744452183 |
| DDX27    | ENSG00000124228.14 | 7.509004978 | 6.261715346 | 6.579474666 |
| DGUOK    | ENSG00000114956.19 | 6.635067853 | 6.808062223 | 5.80763395  |
| MRPS24   | ENSG00000062582.13 | 6.52423578  | 6.722906482 | 5.832284762 |
| GTPBP2   | ENSG00000172432.18 | 6.662346464 | 7.114465363 | 7.42303272  |
| PAK2     | ENSG00000180370.10 | 5.87208938  | 6.266890517 | 5.795345752 |
| BFAR     | ENSG00000103429.10 | 6.553688931 | 6.409754743 | 6.367081318 |
| TMEM167A | ENSG00000174695.9  | 6.20371947  | 5.812197977 | 6.163184412 |
| GSPT1    | ENSG00000103342.12 | 7.572129987 | 6.412221382 | 6.212141515 |
| AP2A1    | ENSG00000196961.12 | 6.69502718  | 7.127075413 | 6.64195314  |
| NDUFAF8  | ENSG00000224877.3  | 6.822462931 | 6.828601629 | 7.012170143 |
| GAS5     | ENSG00000234741.7  | 8.005438991 | 6.809789952 | 7.189692066 |
| ELOVL1   | ENSG00000066322.14 | 6.233369873 | 6.575512194 | 5.928451924 |
| UTP4     | ENSG00000141076.17 | 7.281269297 | 6.346573275 | 5.817959311 |
| PSIP1    | ENSG00000164985.14 | 7.956634801 | 6.253149583 | 5.863035252 |
| PSME3    | ENSG00000131467.10 | 7.730096926 | 7.758410496 | 7.225328921 |
| MAGED2   | ENSG00000102316.16 | 5.855687172 | 8.137034111 | 7.525406493 |
| CD99     | ENSG00000002586.18 | 5.79706494  | 7.81958945  | 9.515963658 |
| USP7     | ENSG00000187555.14 | 6.577105472 | 6.069304889 | 6.194993867 |
| CLDND1   | ENSG00000080822.16 | 6.417144938 | 6.976238126 | 5.919968867 |
| CHMP5    | ENSG00000086065.13 | 7.277861895 | 6.232568301 | 6.007915237 |
| ETFB     | ENSG00000105379.9  | 7.623341399 | 6.379968324 | 6.094375288 |
| MZT2A    | ENSG00000173272.15 | 5.900678451 | 5.900866614 | 6.411104558 |
| NPTN     | ENSG00000156642.16 | 6.333989649 | 6.705025431 | 6.646086727 |
| ERF      | ENSG00000105722.9  | 6.940475244 | 7.178226948 | 5.811774215 |
| TEX261   | ENSG00000144043.11 | 6.709442605 | 6.483276924 | 5.817625986 |
| ERCC3    | ENSG00000163161.12 | 6.045245527 | 5.905638092 | 6.158718218 |
| MRPL39   | ENSG00000154719.13 | 6.203324657 | 5.998252049 | 5.974181466 |
| TTC37    | ENSG00000198677.10 | 6.186526241 | 5.85944778  | 6.352788289 |
| TCF25    | ENSG00000141002.19 | 5.914399751 | 6.923891291 | 8.001406273 |
| RUVBL1   | ENSG00000175792.11 | 7.629449251 | 7.079136529 | 5.756153304 |
| TOP2B    | ENSG00000077097.15 | 6.939883973 | 6.75312483  | 6.276910078 |



|         |                    |             |             |             |
|---------|--------------------|-------------|-------------|-------------|
| RCAN1   | ENSG00000159200.17 | 7.36365788  | 5.932555796 | 7.458448021 |
| ASPH    | ENSG00000198363.17 | 7.130481871 | 6.235949438 | 5.846727033 |
| USO1    | ENSG00000138768.14 | 6.051330154 | 6.868909413 | 6.233666006 |
| IMP3    | ENSG00000177971.8  | 6.694197844 | 6.712017441 | 6.066509441 |
| EIF4E2  | ENSG00000135930.13 | 6.563275928 | 6.222930879 | 5.861823455 |
| SZRD1   | ENSG00000055070.16 | 6.874295753 | 6.961499132 | 6.976115222 |
| SRSF7   | ENSG00000115875.18 | 7.057344059 | 6.431150988 | 5.762634159 |
| RPF1    | ENSG00000117133.10 | 6.715773361 | 6.045219933 | 5.795284627 |
| BAP1    | ENSG00000163930.9  | 5.909780364 | 6.248396559 | 6.019309193 |
| CASC3   | ENSG00000108349.16 | 6.438582512 | 5.8993758   | 6.426717669 |
| SUMO1   | ENSG00000116030.16 | 6.339077361 | 6.380829116 | 6.2605707   |
| OSBPL8  | ENSG00000091039.16 | 5.865325258 | 5.797741592 | 7.078187301 |
| USB1    | ENSG00000103005.11 | 5.970878632 | 6.002573159 | 5.899494145 |
| MRPS7   | ENSG00000125445.10 | 6.513613875 | 6.681053856 | 6.455839769 |
| TRPV2   | ENSG00000187688.14 | 5.902436876 | 7.180253322 | 7.390075885 |
| MANBAL  | ENSG00000101363.12 | 5.875621294 | 5.783164832 | 6.100996062 |
| MCM7    | ENSG00000166508.17 | 8.15738162  | 7.244226217 | 5.79089483  |
| PAIP1   | ENSG00000172239.13 | 6.767200391 | 7.044405115 | 6.829419429 |
| SARAF   | ENSG00000133872.13 | 5.887167182 | 6.352828804 | 6.01747037  |
| PTPRS   | ENSG00000105426.16 | 6.41288174  | 6.761150221 | 5.783908115 |
| C7orf73 | ENSG00000243317.7  | 6.190794198 | 5.83403314  | 6.015254005 |
| RBBP6   | ENSG00000122257.18 | 6.338860493 | 5.993544583 | 6.276616844 |
| MFSD1   | ENSG00000118855.18 | 6.499707638 | 7.08573156  | 6.629032818 |
| MAD2L2  | ENSG00000116670.14 | 5.883161639 | 6.134484135 | 7.010925258 |
| CYFIP1  | ENSG00000273749.4  | 6.378247714 | 6.393858046 | 6.741894111 |
| PTK2    | ENSG00000169398.19 | 6.435892191 | 5.981128785 | 5.85471839  |
| PRMT5   | ENSG00000100462.15 | 6.696287078 | 5.757043896 | 5.900481386 |
| LSM8    | ENSG00000128534.7  | 5.838540489 | 6.309987503 | 6.819301934 |
| GALE    | ENSG00000117308.14 | 6.294661614 | 6.154668652 | 6.98379992  |
| DCTN6   | ENSG00000104671.7  | 5.96096904  | 6.028009515 | 5.893001697 |
| MAPK3   | ENSG00000102882.11 | 6.160825989 | 6.058596845 | 6.151510481 |
| PES1    | ENSG00000100029.17 | 7.221427781 | 7.277549216 | 6.795788314 |
| ARF6    | ENSG00000165527.6  | 6.222780266 | 5.867893357 | 7.250074047 |
| RRM1    | ENSG00000167325.14 | 7.150592436 | 6.361742124 | 5.856964814 |
| LSM7    | ENSG00000130332.14 | 6.915369629 | 7.360413546 | 6.329175687 |
| INTS1   | ENSG00000164880.15 | 6.700991387 | 7.065640967 | 6.007447962 |
| NDFIP1  | ENSG00000131507.10 | 6.478253654 | 5.804095046 | 6.726442865 |
| SCYL1   | ENSG00000142186.16 | 5.853635509 | 6.393195197 | 6.410214789 |
| PHF5A   | ENSG00000100410.7  | 6.451044704 | 6.364974543 | 5.80235908  |
| EIF3F   | ENSG00000175390.13 | 6.509616536 | 6.513075834 | 6.18091899  |
| OLA1    | ENSG00000138430.15 | 6.156015518 | 5.989235389 | 6.720525098 |
| AFF4    | ENSG00000072364.12 | 6.000970137 | 6.037346189 | 6.643005061 |
| PJA2    | ENSG00000198961.9  | 6.142611322 | 5.780755513 | 6.708058454 |
| KLC1    | ENSG00000126214.21 | 6.461131069 | 6.508360544 | 5.871808793 |
| PPP1R11 | ENSG00000204619.7  | 6.550627659 | 6.278931853 | 6.813798651 |
| SREBF2  | ENSG00000198911.11 | 5.779294732 | 7.029326494 | 6.992383554 |

|          |                    |             |             |             |
|----------|--------------------|-------------|-------------|-------------|
| SERP1    | ENSG00000120742.10 | 6.881820891 | 6.672991209 | 6.523397973 |
| APOBEC3C | ENSG00000244509.3  | 5.7361958   | 6.622525034 | 7.064193249 |
| AKT1S1   | ENSG00000204673.10 | 7.542778207 | 6.793708577 | 6.29150656  |
| SPART    | ENSG00000133104.12 | 6.401887281 | 6.357838097 | 6.565364464 |
| STAT1    | ENSG00000115415.18 | 5.881472412 | 6.22477834  | 7.283248308 |
| UBQLN1   | ENSG00000135018.13 | 6.742287332 | 6.877900299 | 6.205653725 |
| PRC1     | ENSG00000198901.13 | 7.148053249 | 6.00119758  | 6.355344364 |
| RPL37    | ENSG00000145592.13 | 7.427051235 | 6.989336169 | 6.464035815 |
| IGF2R    | ENSG00000197081.12 | 5.735412057 | 6.992982236 | 7.01641381  |
| MANF     | ENSG00000145050.15 | 7.583329634 | 7.160433551 | 5.844240172 |
| PRKAA1   | ENSG00000132356.11 | 6.486966565 | 6.562992528 | 6.041903293 |
| JAK1     | ENSG00000162434.11 | 5.874246465 | 6.724973558 | 6.677834142 |
| GTF3C6   | ENSG00000155115.6  | 7.060267719 | 6.074468305 | 5.739280037 |
| EIF2B1   | ENSG00000111361.12 | 7.424930509 | 5.844879165 | 5.802801201 |
| RNPEP    | ENSG00000176393.10 | 7.293858338 | 6.484958457 | 6.076561986 |
| VGLL4    | ENSG00000144560.14 | 6.493570807 | 6.519234676 | 6.449633653 |
| TSNAX    | ENSG00000116918.13 | 7.133781306 | 5.932182221 | 6.608245019 |
| EMC6     | ENSG00000127774.6  | 6.679070027 | 5.766349894 | 6.101901778 |
| NDUFS6   | ENSG00000145494.11 | 6.926664242 | 6.778764484 | 5.906767715 |
| POR      | ENSG00000127948.15 | 5.743671273 | 7.447522953 | 5.763193674 |
| PRPF40A  | ENSG00000196504.15 | 5.908723462 | 6.254749949 | 5.745887456 |
| IMPAD1   | ENSG00000104331.8  | 6.861565253 | 6.327718596 | 5.727832893 |
| CMTM6    | ENSG00000091317.7  | 6.86959551  | 6.586824215 | 5.709279977 |
| C6orf106 | ENSG00000196821.9  | 5.704867932 | 6.595528405 | 7.053689915 |
| ERCC1    | ENSG00000012061.15 | 7.372443224 | 5.97575358  | 7.25564183  |
| TSG101   | ENSG00000074319.12 | 6.311990551 | 6.591498537 | 6.45710009  |
| GAS7     | ENSG00000007237.18 | 7.95078873  | 6.315198637 | 5.751619096 |
| WDR46    | ENSG00000227057.9  | 7.000312989 | 7.585244591 | 5.820440327 |
| FTSJ3    | ENSG00000108592.16 | 7.56702671  | 6.127902214 | 5.763508212 |
| WASHC5   | ENSG00000164961.15 | 5.758076714 | 5.970928447 | 5.943492954 |
| PTOV1    | ENSG00000104960.15 | 6.286289778 | 6.482832545 | 6.28372091  |
| PDHB     | ENSG00000168291.12 | 6.937860441 | 6.108643253 | 5.751242595 |
| SCAND1   | ENSG00000171222.10 | 6.615154354 | 5.783173909 | 6.674040961 |
| CIC      | ENSG00000079432.7  | 6.003486718 | 6.670553451 | 5.948679756 |
| PRPF31   | ENSG00000105618.13 | 6.923495391 | 5.716030479 | 6.205158915 |
| DNASE2   | ENSG00000105612.8  | 6.063789696 | 6.497093745 | 5.785713077 |
| MAF1     | ENSG00000179632.9  | 6.843868333 | 6.063916355 | 6.209540966 |
| ACBD3    | ENSG00000182827.8  | 6.345327698 | 5.7683337   | 5.691822719 |
| OXA1L    | ENSG00000155463.12 | 6.703954005 | 5.852817243 | 6.970065973 |
| BOD1     | ENSG00000145919.10 | 6.112854722 | 5.820392623 | 5.871435916 |
| UCK2     | ENSG00000143179.14 | 6.915886258 | 6.490098627 | 5.911162608 |
| TCERG1   | ENSG00000113649.11 | 6.726884187 | 6.056089229 | 6.083384067 |
| POP7     | ENSG00000172336.4  | 6.561047488 | 6.667914492 | 5.756814762 |
| RDH11    | ENSG00000072042.12 | 6.141124329 | 6.110712886 | 5.741642369 |
| ADAT1    | ENSG00000065457.10 | 7.201658582 | 6.084180913 | 6.282852622 |
| STUB1    | ENSG00000103266.10 | 6.673015096 | 6.347298696 | 6.106366261 |

|          |                    |             |             |             |
|----------|--------------------|-------------|-------------|-------------|
| MRPL21   | ENSG00000197345.12 | 6.946904401 | 5.80444074  | 5.923502375 |
| PNN      | ENSG00000100941.8  | 6.235082254 | 5.734839081 | 5.996091927 |
| MSL1     | ENSG00000188895.11 | 6.033502976 | 6.440816715 | 6.163704289 |
| MGAT5    | ENSG00000152127.8  | 5.850439584 | 6.547018132 | 8.673755952 |
| TCEAL8   | ENSG00000180964.16 | 5.733459239 | 6.946246693 | 6.536289774 |
| PTGFRN   | ENSG00000134247.9  | 6.207841231 | 5.764861534 | 6.761352567 |
| MT-TF    | ENSG00000210049.1  | 6.341714866 | 6.559186507 | 5.933437592 |
| ARL2     | ENSG00000213465.7  | 6.827548471 | 5.741601311 | 6.49572556  |
| FAM96B   | ENSG00000166595.11 | 7.383381787 | 5.83734818  | 6.142090246 |
| TMEM109  | ENSG00000110108.9  | 6.726708791 | 5.8285577   | 5.831384704 |
| CLINT1   | ENSG00000113282.13 | 6.829771894 | 5.884895461 | 6.163102743 |
| ARAF     | ENSG00000078061.12 | 6.625417458 | 5.829678166 | 5.756558273 |
| ENTPD6   | ENSG00000197586.12 | 6.523141023 | 7.430988738 | 6.327418332 |
| RAB14    | ENSG00000119396.10 | 6.981720474 | 6.789145114 | 5.707307666 |
| TMEM87A  | ENSG00000103978.15 | 5.81615731  | 6.535539497 | 5.990826406 |
| HIGD1A   | ENSG00000181061.13 | 5.993488109 | 7.113707359 | 6.674526414 |
| PPFIBP1  | ENSG00000110841.13 | 6.781397587 | 6.518725408 | 7.155920861 |
| SRP54    | ENSG00000100883.11 | 6.194160435 | 5.935782425 | 6.060544003 |
| GTF3C1   | ENSG00000077235.17 | 6.296608066 | 6.043298688 | 5.90303275  |
| NSUN2    | ENSG00000037474.14 | 7.408163064 | 7.138515852 | 5.781647038 |
| BRMS1    | ENSG00000174744.13 | 5.989354987 | 5.799186666 | 6.036851843 |
| PPP4R3B  | ENSG00000275052.4  | 6.140190573 | 6.112438075 | 5.96313908  |
| COA6     | ENSG00000168275.14 | 6.672692975 | 6.100143589 | 5.91012869  |
| PDCD6IP  | ENSG00000170248.13 | 5.804619397 | 5.851242304 | 6.199675355 |
| RHOT2    | ENSG00000140983.13 | 7.161816843 | 6.551784379 | 6.222437192 |
| TBC1D9B  | ENSG00000197226.12 | 5.98676035  | 5.745459854 | 5.832430718 |
| PAICS    | ENSG00000128050.8  | 7.621252738 | 7.14492214  | 5.89090874  |
| TFDP1    | ENSG00000198176.12 | 8.191414806 | 6.478067632 | 5.782958061 |
| LSM14A   | ENSG00000257103.8  | 6.726804772 | 5.912449222 | 6.229568352 |
| CMAS     | ENSG00000111726.12 | 6.587604017 | 7.026129182 | 6.91547948  |
| LDB1     | ENSG00000198728.10 | 6.415777206 | 5.857486813 | 6.118712238 |
| ATP6V1C1 | ENSG00000155097.11 | 5.712583633 | 6.98126591  | 7.064248535 |
| FIP1L1   | ENSG00000145216.15 | 6.865061861 | 5.733330696 | 6.652142508 |
| ASAP1    | ENSG00000153317.14 | 5.681679687 | 6.116085501 | 6.592373594 |
| NUSAP1   | ENSG00000137804.12 | 6.591636869 | 5.751185803 | 5.783903498 |
| GPD2     | ENSG00000115159.15 | 5.675587628 | 6.191468921 | 6.341043349 |
| YKT6     | ENSG00000106636.7  | 7.402544025 | 8.304618918 | 7.284394322 |
| CACYBP   | ENSG00000116161.17 | 7.676972695 | 6.121345388 | 5.831421433 |
| MRPL11   | ENSG00000174547.13 | 6.574123981 | 5.745285465 | 5.737504804 |
| NAPA     | ENSG00000105402.7  | 5.941640659 | 5.861777881 | 5.72769668  |
| SKIV2L   | ENSG00000204351.11 | 6.126389341 | 6.57708668  | 6.087092474 |
| UBALD2   | ENSG00000185262.8  | 7.463427072 | 6.530107157 | 6.620132895 |
| PHPT1    | ENSG00000054148.17 | 5.996791832 | 7.268944136 | 7.119917687 |
| NTAN1    | ENSG00000157045.8  | 5.67884054  | 6.288289047 | 6.415615786 |
| YAP1     | ENSG00000137693.13 | 6.811991177 | 5.783801142 | 7.288197531 |
| RAB2A    | ENSG00000104388.14 | 6.012010826 | 6.096627834 | 6.47503459  |

|         |                    |             |             |             |
|---------|--------------------|-------------|-------------|-------------|
| MT-TT   | ENSG00000210195.2  | 5.747808527 | 7.383872058 | 6.513065975 |
| NUMA1   | ENSG00000137497.17 | 6.947221988 | 5.796871099 | 6.130453895 |
| RAF1    | ENSG00000132155.11 | 6.770647791 | 6.470613582 | 5.862086814 |
| DUSP14  | ENSG00000276023.4  | 6.572147274 | 6.486826603 | 6.529895097 |
| TPGS2   | ENSG00000134779.14 | 6.036392414 | 6.473196444 | 5.76004685  |
| ARHGAP1 | ENSG00000175220.11 | 6.693093517 | 6.670302692 | 6.998870203 |
| GTF2H1  | ENSG00000110768.11 | 5.813078882 | 6.499008756 | 5.720485397 |
| CMPK1   | ENSG00000162368.13 | 7.205173939 | 6.352529105 | 5.901727835 |
| UBA3    | ENSG00000144744.16 | 6.469204381 | 6.487832636 | 5.854406404 |
| ECH1    | ENSG00000104823.8  | 6.892970231 | 6.149978066 | 5.98796194  |
| MRPL17  | ENSG00000158042.8  | 6.128908962 | 6.576001518 | 5.826606841 |
| BCCIP   | ENSG00000107949.16 | 7.538442716 | 6.21013668  | 6.241893629 |
| FAF2    | ENSG00000113194.12 | 6.544148222 | 5.928471931 | 5.726355524 |
| AKT2    | ENSG00000105221.16 | 6.660933723 | 6.712927706 | 6.893966092 |
| CDK2    | ENSG00000123374.10 | 6.459907058 | 9.472390578 | 5.867567803 |
| ATP6V1H | ENSG00000047249.17 | 5.723019963 | 6.347321471 | 6.505591449 |
| SS18    | ENSG00000141380.13 | 6.250249478 | 6.435034765 | 5.671353498 |
| UGGT1   | ENSG00000136731.12 | 5.962306913 | 6.146211837 | 5.670636553 |
| EZR     | ENSG00000092820.17 | 6.508500144 | 5.679376146 | 5.9477238   |
| UBE2Q1  | ENSG00000160714.9  | 6.935669065 | 6.840086593 | 5.988212541 |
| SRRM1   | ENSG00000133226.16 | 6.486440238 | 6.337591165 | 5.761969172 |
| MRPS12  | ENSG00000128626.11 | 6.796046486 | 6.724445517 | 5.733624064 |
| KBTBD2  | ENSG00000170852.10 | 5.703543625 | 5.945674056 | 6.132552224 |
| ABCE1   | ENSG00000164163.10 | 7.041516513 | 6.411509876 | 5.742426236 |
| PRKD3   | ENSG00000115825.9  | 5.789825898 | 8.049193994 | 7.336147277 |
| MRPS21  | ENSG00000266472.5  | 7.292966441 | 7.221691689 | 5.650221031 |
| WASF2   | ENSG00000158195.10 | 6.528197362 | 6.517610758 | 6.481902704 |
| ZFAND6  | ENSG00000086666.18 | 5.906560272 | 6.099503713 | 6.446548611 |
| CNOT9   | ENSG00000144580.13 | 5.85840082  | 6.247761412 | 5.783196294 |
| EMC3    | ENSG00000125037.12 | 5.883674323 | 5.994697618 | 5.703637757 |
| AIFM1   | ENSG00000156709.13 | 6.547310108 | 6.99133348  | 6.183537198 |
| SAT1    | ENSG00000130066.16 | 5.681281317 | 7.752494519 | 10.06760739 |
| MAGOH   | ENSG00000162385.10 | 7.424719328 | 6.134036628 | 5.752488058 |
| IDH3A   | ENSG00000166411.13 | 6.380038303 | 6.114327372 | 6.58481542  |
| SNW1    | ENSG00000100603.13 | 6.521322818 | 5.770675062 | 6.777528529 |
| PRCC    | ENSG00000143294.14 | 7.573524618 | 6.881450241 | 5.723153573 |
| NCAPG2  | ENSG00000146918.19 | 5.981083638 | 6.157107552 | 5.716478591 |
| ID3     | ENSG00000117318.8  | 7.339714211 | 7.589993647 | 6.080752757 |
| CEBPB   | ENSG00000172216.5  | 6.835778048 | 6.903258425 | 7.829403588 |
| FURIN   | ENSG00000140564.11 | 6.887158135 | 6.59302552  | 5.668987694 |
| CBX6    | ENSG00000183741.11 | 6.143708125 | 6.069685964 | 5.759158633 |
| MBOAT7  | ENSG00000125505.16 | 6.622130396 | 5.796748452 | 5.903609038 |
| DAP     | ENSG00000112977.15 | 7.483374446 | 7.605187845 | 6.286457033 |
| PPP2R1A | ENSG00000105568.17 | 7.163895591 | 6.449547413 | 6.36590229  |
| ATP6AP1 | ENSG00000071553.16 | 6.35699718  | 6.655900075 | 6.635926192 |
| ENOPH1  | ENSG00000145293.15 | 5.633923015 | 5.673830537 | 6.49449101  |

|            |                    |             |             |             |
|------------|--------------------|-------------|-------------|-------------|
| SPRED2     | ENSG00000198369.9  | 6.07358598  | 6.630989536 | 5.723831921 |
| KIFC3      | ENSG00000140859.15 | 6.953058274 | 5.67262008  | 6.403149681 |
| CDKN2AIPNL | ENSG00000237190.3  | 6.530395778 | 5.647041266 | 6.036548544 |
| MCM4       | ENSG00000104738.16 | 7.533738595 | 6.233188399 | 5.803895242 |
| TAF10      | ENSG00000166337.9  | 6.294605148 | 6.732656962 | 5.923751843 |
| SNHG8      | ENSG00000269893.6  | 7.489736389 | 5.647747372 | 7.082290857 |
| NDUFA2     | ENSG00000131495.8  | 7.031254138 | 6.085769556 | 6.489621683 |
| SLC35B1    | ENSG00000121073.13 | 5.924726899 | 6.393407824 | 6.221392539 |
| TAF9       | ENSG00000273841.4  | 6.674531508 | 6.777461722 | 6.241418747 |
| RRBP1      | ENSG00000125844.15 | 6.890744427 | 7.345019968 | 5.729658562 |
| THOC2      | ENSG00000125676.19 | 6.793087469 | 6.212354815 | 5.895326282 |
| WASL       | ENSG00000106299.7  | 5.62079829  | 6.569977042 | 7.030402567 |
| PTPN12     | ENSG00000127947.15 | 6.805917972 | 6.739627543 | 5.750903531 |
| BPTF       | ENSG00000171634.16 | 5.832621697 | 6.042509021 | 6.311025357 |
| PCMT1      | ENSG00000120265.16 | 7.246447822 | 6.545015391 | 5.715378898 |
| RBX1       | ENSG00000100387.8  | 5.661943679 | 5.855700488 | 5.797730021 |
| B3GAT3     | ENSG00000149541.9  | 6.610462959 | 5.672975986 | 6.151749948 |
| DNAJA2     | ENSG00000069345.11 | 6.50389995  | 5.616703431 | 6.279700473 |
| SAMD4B     | ENSG00000179134.15 | 6.835464813 | 7.702140744 | 6.697356594 |
| ERI3       | ENSG00000117419.14 | 6.653112427 | 6.094283746 | 5.754130326 |
| PATL1      | ENSG00000166889.13 | 5.699656374 | 6.070938085 | 6.240972847 |
| NUB1       | ENSG00000013374.15 | 6.112912025 | 6.077939661 | 6.288144358 |
| GNA13      | ENSG00000120063.9  | 5.937528037 | 6.037186977 | 6.950043082 |
| TXNDC12    | ENSG00000117862.11 | 6.616702381 | 5.981245746 | 5.622308086 |
| CCAR1      | ENSG00000060339.13 | 6.813362358 | 6.296554291 | 5.795228387 |
| FUCA2      | ENSG00000001036.13 | 5.644666712 | 5.621468212 | 5.94328968  |
| SMARCD2    | ENSG00000108604.15 | 6.665040929 | 6.570411074 | 6.477374941 |
| ATG101     | ENSG00000123395.14 | 7.125527265 | 6.587711382 | 5.647743754 |
| PLD3       | ENSG00000105223.19 | 6.048178691 | 7.218400901 | 5.797638067 |
| RPL7L1     | ENSG00000146223.14 | 6.430940001 | 6.161775494 | 6.112836325 |
| TMEM59     | ENSG00000116209.11 | 6.563364206 | 6.167837119 | 6.053835987 |
| UBTF       | ENSG00000108312.14 | 6.633208244 | 5.617539129 | 5.897246007 |
| CPSF7      | ENSG00000149532.15 | 6.607623628 | 5.896656421 | 5.699011055 |
| DNAJC3     | ENSG00000102580.14 | 5.849737519 | 5.807052934 | 5.905062575 |
| PLIN3      | ENSG00000105355.8  | 5.970745068 | 6.554099493 | 5.718471683 |
| ZC3H7A     | ENSG00000122299.11 | 6.406725678 | 5.855801626 | 6.463222171 |
| LHFPL2     | ENSG00000145685.13 | 5.83012862  | 5.626187597 | 6.715600033 |
| MFGE8      | ENSG00000140545.14 | 5.941852943 | 6.947410288 | 8.783148192 |
| MRPL4      | ENSG00000105364.13 | 6.935186435 | 6.098532374 | 6.192477222 |
| DPP9       | ENSG00000142002.16 | 6.464140259 | 6.589762655 | 6.160461829 |
| PUM2       | ENSG00000055917.15 | 6.156102528 | 5.922159698 | 6.194974251 |
| C11orf24   | ENSG00000171067.10 | 6.302172448 | 7.501890274 | 6.584378727 |
| NCAPD2     | ENSG00000010292.12 | 7.653695059 | 5.790228181 | 5.709884472 |
| NPEPPS     | ENSG00000141279.15 | 6.407473779 | 6.227932961 | 6.688844697 |
| SPRED1     | ENSG00000166068.12 | 5.94053149  | 5.64987782  | 5.716792189 |
| CAV1       | ENSG00000105974.11 | 6.305458716 | 6.085381423 | 5.926526474 |

|          |                    |             |             |             |
|----------|--------------------|-------------|-------------|-------------|
| PRMT2    | ENSG00000160310.17 | 5.712850196 | 6.222574155 | 7.323596305 |
| RNF14    | ENSG00000013561.17 | 5.80934919  | 5.726866164 | 6.851677895 |
| CLPP     | ENSG00000125656.8  | 6.742897638 | 5.85334813  | 6.067411558 |
| SF3A3    | ENSG00000183431.11 | 7.588191647 | 6.514701236 | 5.686760413 |
| SEC16A   | ENSG00000148396.18 | 6.247781206 | 7.379336744 | 7.179316752 |
| UBE2I    | ENSG00000103275.19 | 6.058416879 | 5.918771038 | 6.526335349 |
| MAP1LC3B | ENSG00000140941.12 | 6.159723857 | 7.218117732 | 7.567544414 |
| HLA-B    | ENSG00000234745.10 | 8.639388331 | 6.161997125 | 5.745443925 |
| TUSC3    | ENSG00000104723.20 | 6.548417568 | 5.762981388 | 7.679891173 |
| ITGAV    | ENSG00000138448.11 | 5.641460536 | 6.708645596 | 6.176680679 |
| CLCN7    | ENSG00000103249.17 | 5.749658611 | 7.614098886 | 8.602250067 |
| ARFGEF2  | ENSG00000124198.8  | 5.630332013 | 5.855971637 | 6.281265878 |
| NOL11    | ENSG00000130935.9  | 6.600428293 | 5.733543571 | 5.696443444 |
| HARS     | ENSG00000170445.12 | 6.976206583 | 5.657448355 | 6.097090793 |
| SLC16A1  | ENSG00000155380.11 | 6.72288035  | 5.613818255 | 5.987335628 |
| RECQL    | ENSG00000004700.15 | 6.564577425 | 6.615413483 | 5.585274683 |
| MAGED1   | ENSG00000179222.17 | 6.794006381 | 8.174238519 | 5.670181052 |
| TMEM205  | ENSG00000105518.13 | 5.990167099 | 5.915529052 | 5.651302723 |
| PFKL     | ENSG00000141959.16 | 5.66837371  | 6.267075482 | 6.0978834   |
| HACD3    | ENSG00000074696.12 | 5.942632128 | 6.094503041 | 6.03165171  |
| GGNBP2   | ENSG00000278311.4  | 6.10964429  | 6.256320918 | 6.65337611  |
| STK25    | ENSG00000115694.14 | 5.673020941 | 6.11780474  | 5.792949629 |
| M6PR     | ENSG00000003056.7  | 6.320809419 | 6.831228708 | 6.205590513 |
| MICALL1  | ENSG00000100139.13 | 6.567774639 | 6.154866629 | 6.575823255 |
| TIMMDC1  | ENSG00000113845.9  | 6.243804522 | 6.668177175 | 5.883573086 |
| MINOS1   | ENSG00000173436.13 | 5.924567707 | 5.980804047 | 5.962112545 |
| UBL7     | ENSG00000138629.15 | 6.944062076 | 6.382364406 | 6.047171671 |
| ADAM9    | ENSG00000168615.11 | 5.95708423  | 5.660645579 | 6.66238952  |
| FEN1     | ENSG00000168496.3  | 7.659286649 | 6.538916618 | 5.737166607 |
| PLBD2    | ENSG00000151176.7  | 5.66829962  | 7.324249124 | 5.590095234 |
| FARSB    | ENSG00000116120.9  | 5.6877115   | 6.292591361 | 5.575238572 |
| PTPMT1   | ENSG00000110536.13 | 6.376953957 | 6.505691622 | 6.237485798 |
| METTL9   | ENSG00000197006.13 | 5.823826805 | 6.857213696 | 9.594665273 |
| ASXL1    | ENSG00000171456.16 | 6.003572494 | 5.615859162 | 7.292023014 |
| EDEM1    | ENSG00000134109.10 | 6.450786577 | 6.420512952 | 6.386793233 |
| REXO2    | ENSG00000076043.9  | 6.723462802 | 6.732194852 | 6.697868448 |
| ZCCHC17  | ENSG00000121766.15 | 6.837608381 | 6.074673561 | 5.592627235 |
| PPP1R15A | ENSG00000087074.7  | 6.452776795 | 7.617204878 | 8.541111574 |
| MIEF1    | ENSG00000100335.13 | 6.625718812 | 6.619675286 | 6.696885727 |
| AHNAK    | ENSG00000124942.13 | 7.21557244  | 6.473911261 | 6.333716775 |
| MRPS10   | ENSG00000048544.5  | 5.584336407 | 6.272370266 | 6.343913123 |
| DERL1    | ENSG00000136986.9  | 6.029138984 | 5.71907444  | 5.960225014 |
| NDUFC1   | ENSG00000109390.11 | 6.394900318 | 5.817318653 | 6.432728563 |
| DDX6     | ENSG00000110367.11 | 6.757700753 | 5.686399934 | 6.550961756 |
| CIRBP    | ENSG00000099622.13 | 6.571241662 | 5.853206659 | 6.622610599 |
| MRPL14   | ENSG00000180992.6  | 6.160003407 | 5.766888612 | 5.902869523 |

|          |                    |             |             |             |
|----------|--------------------|-------------|-------------|-------------|
| POLR2J   | ENSG00000005075.15 | 6.198431015 | 6.280209906 | 5.638269386 |
| FOXM1    | ENSG00000111206.12 | 6.696453448 | 5.912651646 | 5.932808191 |
| GNA11    | ENSG00000088256.8  | 6.088854798 | 6.146910412 | 5.898910262 |
| STAG2    | ENSG00000101972.18 | 6.223641303 | 6.397655109 | 6.100711835 |
| LMNB2    | ENSG00000176619.12 | 6.871411772 | 7.174619966 | 5.666135848 |
| UBXN6    | ENSG00000167671.11 | 6.228277661 | 6.49057965  | 6.265330674 |
| RBM4     | ENSG00000173933.19 | 5.826219389 | 5.602452154 | 6.019531496 |
| CCNL2    | ENSG00000221978.11 | 6.091208921 | 7.011008377 | 6.495202306 |
| ALKBH5   | ENSG00000091542.8  | 6.524284183 | 5.645453001 | 6.070819239 |
| MAPKAPK2 | ENSG00000162889.10 | 6.811207124 | 6.080064185 | 6.138032886 |
| VEZF1    | ENSG00000136451.8  | 6.64692973  | 5.654199171 | 6.585711679 |
| ARFGAP1  | ENSG00000101199.12 | 6.100812307 | 6.957199448 | 7.092234317 |
| NACC1    | ENSG00000160877.5  | 7.646343266 | 6.940668035 | 6.25480695  |
| DAZAP2   | ENSG00000183283.15 | 6.2604143   | 6.217143215 | 6.241431748 |
| SCRIB    | ENSG00000180900.18 | 6.510092133 | 6.464160743 | 6.277660782 |
| SYF2     | ENSG00000117614.9  | 6.99516179  | 6.649959125 | 6.029783359 |
| NENF     | ENSG00000117691.9  | 6.746665438 | 5.634904149 | 6.297470437 |
| RETREG2  | ENSG00000144567.10 | 5.563140442 | 6.586403544 | 6.099952959 |
| MT-TE    | ENSG00000210194.1  | 5.890510508 | 7.172001608 | 5.984378405 |
| ARGLU1   | ENSG00000134884.13 | 6.568579924 | 6.068409158 | 6.027471953 |
| TWF2     | ENSG00000247596.8  | 7.265580048 | 6.887115678 | 5.731940671 |
| TERF2IP  | ENSG00000166848.5  | 7.120356101 | 6.197256322 | 7.16677756  |
| TSC2     | ENSG00000103197.16 | 6.895596678 | 5.767651318 | 6.154226374 |
| PSMG1    | ENSG00000183527.11 | 6.741769517 | 6.520261671 | 6.537520518 |
| MYO19    | ENSG00000278259.4  | 6.55578218  | 5.920501456 | 6.054957546 |
| ACSL4    | ENSG00000068366.19 | 5.866421617 | 6.237479117 | 6.354066241 |
| GLRX3    | ENSG00000108010.11 | 7.622728846 | 5.847989406 | 6.308893235 |
| PRR13    | ENSG00000205352.10 | 6.092412769 | 6.382412355 | 5.845302206 |
| TMEM30A  | ENSG00000112697.15 | 6.437146509 | 6.407741436 | 5.924037376 |
| CD164    | ENSG00000135535.15 | 6.245062154 | 6.734340315 | 7.706407915 |
| YIPF5    | ENSG00000145817.16 | 5.684731337 | 6.040378551 | 6.000889343 |
| NPC1     | ENSG00000141458.12 | 5.591851774 | 7.683792323 | 6.594128175 |
| SLC25A11 | ENSG00000108528.13 | 6.627685122 | 5.66087957  | 6.007573031 |
| SUB1     | ENSG00000113387.11 | 6.834715382 | 5.933626361 | 5.956871743 |
| FASTK    | ENSG00000164896.19 | 5.570848097 | 6.940364298 | 6.425377355 |
| MRPL40   | ENSG00000185608.8  | 5.845043808 | 5.917400423 | 5.579701349 |
| MTG2     | ENSG00000101181.17 | 6.096654069 | 5.640828522 | 6.132110641 |
| MIDN     | ENSG00000167470.12 | 5.586849842 | 6.554919811 | 5.728652849 |
| CPSF3    | ENSG00000119203.13 | 7.259047936 | 6.708117377 | 5.598920305 |
| ANKRD40  | ENSG00000154945.6  | 6.127854557 | 5.63490099  | 6.271455941 |
| PDXDC1   | ENSG00000179889.18 | 5.904864572 | 6.703368619 | 7.7894488   |
| DKC1     | ENSG00000130826.17 | 7.172864091 | 6.385026435 | 5.593017609 |
| GLRX2    | ENSG00000023572.8  | 7.028852851 | 5.625243229 | 7.103390024 |
| HOXB7    | ENSG00000260027.4  | 5.636576958 | 5.695612604 | 5.791652351 |
| DTD1     | ENSG00000125821.11 | 6.628606444 | 6.19885773  | 5.608279506 |
| C12orf10 | ENSG00000139637.13 | 7.098173295 | 5.848715193 | 5.702909758 |

|          |                    |             |             |             |
|----------|--------------------|-------------|-------------|-------------|
| DDRGK1   | ENSG00000198171.12 | 6.283298701 | 5.97424233  | 5.55003894  |
| DNAJC11  | ENSG00000007923.15 | 6.186717417 | 6.231699145 | 5.643316598 |
| GRSF1    | ENSG00000132463.13 | 5.620187374 | 6.905883159 | 7.101424903 |
| UBXN1    | ENSG00000162191.13 | 7.153586838 | 6.013264264 | 6.836478098 |
| ACTR3    | ENSG00000115091.11 | 5.877486672 | 6.687923752 | 6.279033053 |
| IDI1     | ENSG00000067064.10 | 5.613318174 | 5.810537384 | 6.927800359 |
| SH3GL1   | ENSG00000141985.9  | 7.111991996 | 6.630438465 | 5.554604693 |
| MAGEF1   | ENSG00000177383.4  | 6.520327568 | 6.324348232 | 6.033643843 |
| CALCOCO2 | ENSG00000136436.14 | 6.505599874 | 5.776215715 | 6.251820327 |
| MAD2L1BP | ENSG00000124688.13 | 5.687822796 | 7.040879875 | 7.232779465 |
| AIMP2    | ENSG00000106305.9  | 6.922870374 | 6.458843457 | 5.707329778 |
| LAMTOR1  | ENSG00000149357.9  | 6.50120258  | 6.198393974 | 5.900932018 |
| ZNF622   | ENSG00000173545.4  | 6.668885487 | 6.938811167 | 7.762468277 |
| SMIM15   | ENSG00000188725.7  | 6.534087289 | 5.569409547 | 6.334394419 |
| MTOR     | ENSG00000198793.12 | 5.928417255 | 6.358713225 | 5.560073512 |
| INTS11   | ENSG00000127054.20 | 6.278737699 | 6.263875122 | 6.08212131  |
| KIF3B    | ENSG00000101350.7  | 5.940543915 | 5.665029946 | 6.316102275 |
| ADSL     | ENSG00000239900.12 | 6.163118965 | 5.895451268 | 5.886460819 |
| STXBP1   | ENSG00000136854.19 | 5.694122432 | 8.262478014 | 7.515886734 |
| TMEM50A  | ENSG00000183726.10 | 6.290063664 | 6.452364122 | 6.035071253 |
| CELF1    | ENSG00000149187.18 | 6.138554431 | 5.801345708 | 5.635715164 |
| GLA      | ENSG00000102393.9  | 6.094547336 | 7.263464048 | 5.895881426 |
| SLC30A5  | ENSG00000145740.18 | 6.638388541 | 6.02296989  | 6.272122821 |
| CPNE3    | ENSG00000085719.12 | 6.899466606 | 6.057787017 | 6.588290363 |
| LYST     | ENSG00000143669.13 | 5.633687628 | 5.801058669 | 7.64164022  |
| ZNF384   | ENSG00000126746.17 | 6.577580675 | 5.687038882 | 5.783768121 |
| UNC50    | ENSG00000115446.11 | 5.572949933 | 6.325372837 | 5.977882041 |
| MARVELD1 | ENSG00000155254.12 | 6.130670385 | 5.957758515 | 5.652580833 |
| URI1     | ENSG00000105176.17 | 6.521850567 | 6.729101183 | 6.260469195 |
| CCNH     | ENSG00000134480.13 | 6.323728149 | 6.147545098 | 5.799511236 |
| ADSS     | ENSG00000035687.9  | 6.883278553 | 5.628850969 | 5.742895299 |
| TCEAL9   | ENSG00000185222.8  | 5.589584884 | 7.636837235 | 6.923716343 |
| MCM5     | ENSG00000100297.15 | 6.291338133 | 5.839561536 | 5.701674817 |
| SYNCRIP  | ENSG00000135316.17 | 7.374463364 | 6.172180457 | 5.550341557 |
| TCTA     | ENSG00000145022.4  | 5.678879711 | 6.174012931 | 5.560647997 |
| PIGS     | ENSG00000087111.20 | 6.741747835 | 6.029820598 | 5.902479754 |
| SART1    | ENSG00000175467.14 | 6.643296292 | 5.81744902  | 5.592191989 |
| EPS8     | ENSG00000151491.12 | 6.41211879  | 6.391467503 | 5.602205058 |
| AGRN     | ENSG00000188157.14 | 5.605127236 | 7.129963344 | 5.584304132 |
| THAP4    | ENSG00000176946.11 | 5.533025742 | 5.908084754 | 5.641256691 |
| AKR7A2   | ENSG00000053371.12 | 6.5394916   | 6.28645521  | 5.996834454 |
| BANF1    | ENSG00000175334.7  | 7.204962063 | 6.089751941 | 5.894467905 |
| CSTB     | ENSG00000160213.6  | 5.585084327 | 8.033908662 | 7.39466521  |
| MPG      | ENSG00000103152.11 | 7.139952316 | 6.437368994 | 6.734563953 |
| NOLC1    | ENSG00000166197.16 | 7.744752073 | 6.403905517 | 5.651953335 |
| C12orf57 | ENSG00000111678.10 | 6.935860693 | 5.569072589 | 5.855210045 |



|          |                    |             |             |             |
|----------|--------------------|-------------|-------------|-------------|
| NFE2L2   | ENSG00000116044.15 | 5.794780737 | 6.14379548  | 5.740483978 |
| UGP2     | ENSG00000169764.15 | 7.344338089 | 6.608137586 | 6.741393627 |
| OGFR     | ENSG00000060491.16 | 6.214604209 | 5.873710343 | 6.259992747 |
| RANGAP1  | ENSG00000100401.19 | 6.914466149 | 6.267519483 | 5.671741692 |
| CDK5RAP3 | ENSG00000108465.14 | 5.757523142 | 6.335290002 | 7.363049502 |
| DDFA     | ENSG00000160049.11 | 6.230282129 | 6.342779222 | 5.564321996 |
| DDX23    | ENSG00000174243.9  | 6.801777257 | 6.589368194 | 5.604853214 |
| SEC11C   | ENSG00000166562.8  | 5.663372141 | 7.399494087 | 6.291962489 |
| PAF1     | ENSG00000006712.14 | 6.481225223 | 6.480628982 | 5.673139362 |
| UCKL1    | ENSG00000198276.15 | 5.61830792  | 5.621022819 | 6.10533896  |
| RCC1L    | ENSG00000274523.4  | 6.769204941 | 6.389935533 | 5.528266726 |
| DDX46    | ENSG00000145833.15 | 7.361889614 | 5.594134179 | 5.744282197 |
| RNF167   | ENSG00000108523.15 | 6.65351818  | 5.872867257 | 5.713452291 |
| SFXN1    | ENSG00000164466.12 | 6.431731174 | 5.827344153 | 6.110244975 |
| C8orf59  | ENSG00000176731.11 | 6.516456474 | 6.398018322 | 6.176034033 |
| CTNND1   | ENSG00000198561.13 | 6.050126238 | 6.605012525 | 5.605292255 |
| GNL2     | ENSG00000134697.12 | 7.199912127 | 6.071908744 | 5.588442601 |
| BRD4     | ENSG00000141867.17 | 6.806496079 | 6.065355345 | 6.463505898 |
| NASP     | ENSG00000132780.16 | 7.258599196 | 6.289789456 | 5.869160524 |
| TEX264   | ENSG00000164081.12 | 6.166124923 | 6.207976293 | 6.182288962 |
| HPRT1    | ENSG00000165704.14 | 6.546617165 | 6.027123435 | 5.499000371 |
| EMC2     | ENSG00000104412.7  | 5.546214661 | 6.096074069 | 6.209387457 |
| CHTOP    | ENSG00000160679.12 | 6.713309014 | 6.408172856 | 5.691557354 |
| UTP3     | ENSG00000132467.3  | 6.360214978 | 6.380704821 | 5.895658706 |
| EIF2S1   | ENSG00000134001.12 | 6.903505203 | 5.78698545  | 6.326238151 |
| TUG1     | ENSG00000253352.8  | 5.957043866 | 5.79438965  | 6.655082952 |
| MAT2B    | ENSG00000038274.16 | 6.59759271  | 5.524329479 | 6.152970858 |
| UQCRFS1  | ENSG00000169021.5  | 5.92161629  | 6.539055753 | 5.737664445 |
| MRPL32   | ENSG00000106591.3  | 6.268414841 | 6.64662671  | 5.573521015 |
| C7orf49  | ENSG00000122783.16 | 6.096424338 | 5.665156888 | 5.502350282 |
| ANKRD28  | ENSG00000206560.11 | 6.021271683 | 6.498701614 | 6.430369446 |
| CCAR2    | ENSG00000158941.16 | 6.626576965 | 5.515957571 | 6.199028651 |
| NDUFAF2  | ENSG00000164182.10 | 6.32376205  | 5.485963283 | 5.643356611 |
| TMBIM1   | ENSG00000135926.14 | 5.60335018  | 7.624290789 | 7.504888857 |
| PACSIN2  | ENSG00000100266.18 | 5.576048438 | 7.258452604 | 9.252513516 |
| RBM5     | ENSG00000003756.16 | 5.959039073 | 6.270633097 | 5.785216787 |
| MRPL38   | ENSG00000204316.12 | 6.436535127 | 6.233407746 | 6.704574606 |
| WDR26    | ENSG00000162923.14 | 6.881364489 | 6.205502782 | 6.524201148 |
| TGOLN2   | ENSG00000152291.13 | 6.292367668 | 7.502582411 | 5.810626001 |
| ELK1     | ENSG00000126767.17 | 6.717281924 | 6.318428366 | 5.956661696 |
| APMAP    | ENSG00000101474.11 | 7.309936055 | 7.397835738 | 5.504432301 |
| EIF1B    | ENSG00000114784.3  | 6.629603096 | 6.119048164 | 6.72525653  |
| ISCU     | ENSG00000136003.15 | 6.025098262 | 6.194516811 | 6.403424301 |
| FBXO18   | ENSG00000134452.19 | 5.517678366 | 6.655022445 | 5.655663181 |
| PITPNB   | ENSG00000180957.17 | 6.355627972 | 6.420874682 | 6.533263326 |
| GDE1     | ENSG00000006007.11 | 6.151805678 | 6.091901774 | 6.057572304 |

|          |                    |             |             |             |
|----------|--------------------|-------------|-------------|-------------|
| TMEM126B | ENSG00000171204.12 | 5.977565319 | 5.775451109 | 5.580299438 |
| TOPBP1   | ENSG00000163781.12 | 6.56270613  | 6.179196675 | 5.50648003  |
| DNM1L    | ENSG00000087470.17 | 6.902977878 | 5.825993055 | 5.510247365 |
| CAMTA1   | ENSG00000171735.18 | 5.951392478 | 6.404288156 | 6.445099907 |
| ZFR      | ENSG00000056097.15 | 6.754121819 | 6.341186459 | 6.247302091 |
| TMEM179B | ENSG00000185475.10 | 6.791343185 | 5.918697044 | 5.567681245 |
| BAMBI    | ENSG00000095739.10 | 6.266659044 | 8.506934096 | 7.849972051 |
| SLC25A36 | ENSG00000114120.11 | 6.091730697 | 6.524148055 | 6.334330329 |
| TBCB     | ENSG00000105254.11 | 6.652320893 | 6.19626328  | 6.68160908  |
| USP4     | ENSG00000114316.12 | 5.952284157 | 5.717664471 | 5.780322942 |
| RNF213   | ENSG00000173821.19 | 5.830910828 | 6.287865577 | 5.697934596 |
| ATG4B    | ENSG00000168397.16 | 5.653394809 | 5.645573367 | 6.436129134 |
| HRAS     | ENSG00000174775.16 | 6.160593528 | 6.3319505   | 5.902979627 |
| TMEM126A | ENSG00000171202.6  | 6.027311584 | 5.767481379 | 6.174894077 |
| ENO2     | ENSG00000111674.8  | 5.588483446 | 5.759185268 | 7.438339016 |
| EIF2B5   | ENSG00000145191.12 | 5.500445288 | 5.757721297 | 5.678790554 |
| NOB1     | ENSG00000141101.12 | 7.024392011 | 6.167422254 | 5.774450537 |
| TK1      | ENSG00000167900.11 | 6.783333238 | 5.528359514 | 5.758604402 |
| TRAPPC12 | ENSG00000171853.15 | 5.781483858 | 5.995859717 | 5.734984722 |
| RFX5     | ENSG00000143390.17 | 7.17813156  | 6.788003486 | 5.550341062 |
| TIMM44   | ENSG00000104980.7  | 6.439236708 | 5.712278001 | 6.658370866 |
| PCNP     | ENSG00000081154.11 | 6.091636358 | 5.86874874  | 5.491099299 |
| ATG9A    | ENSG00000198925.10 | 5.753287234 | 5.495768672 | 5.619093858 |
| SRPX     | ENSG00000101955.14 | 7.916993865 | 7.431932202 | 5.464888899 |
| NAA50    | ENSG00000121579.12 | 6.78694738  | 6.328580178 | 6.008706339 |
| MED15    | ENSG00000099917.17 | 5.539062564 | 6.773681474 | 6.663429048 |
| RNF5     | ENSG00000204308.7  | 6.280391051 | 5.897843692 | 6.190874089 |
| DNAJC13  | ENSG00000138246.15 | 5.659726059 | 6.229997077 | 6.018140265 |
| CLUH     | ENSG00000132361.16 | 6.231217225 | 6.000148704 | 6.160526655 |
| TMEM127  | ENSG00000135956.8  | 5.471951241 | 6.183541739 | 6.244464191 |
| BRIX1    | ENSG00000113460.12 | 6.980590207 | 5.967016461 | 5.564036848 |
| DCAF8    | ENSG00000132716.18 | 6.438603893 | 6.848338282 | 6.303341885 |
| SMARCE1  | ENSG00000073584.18 | 5.918788944 | 5.891449067 | 6.219513765 |
| UBLCP1   | ENSG00000164332.7  | 6.055076343 | 5.664250292 | 5.510729087 |
| SUPT4H1  | ENSG00000213246.6  | 6.389623406 | 6.000672789 | 6.066796554 |
| ECI2     | ENSG00000198721.12 | 5.724578708 | 5.680111842 | 6.24247637  |
| SCAP     | ENSG00000114650.18 | 6.319801321 | 6.23448363  | 5.565384639 |
| MED24    | ENSG00000008838.19 | 5.783651808 | 6.277870833 | 6.457881243 |
| PTPRA    | ENSG00000132670.20 | 5.933904976 | 5.879811552 | 5.501007351 |
| USP33    | ENSG00000077254.14 | 5.953704717 | 5.495726661 | 5.668699711 |
| STX3     | ENSG00000166900.16 | 5.674521661 | 6.258132773 | 6.389492288 |
| PSPC1    | ENSG00000121390.18 | 6.271250791 | 5.830572524 | 5.495337771 |
| SMARCA5  | ENSG00000153147.5  | 5.682988217 | 5.504004921 | 5.46485101  |
| SPG7     | ENSG00000197912.14 | 5.861508838 | 5.994545401 | 5.702139924 |
| MFAP1    | ENSG00000140259.6  | 6.232559125 | 5.660050707 | 5.716486892 |
| CD2BP2   | ENSG00000169217.8  | 6.624257216 | 5.914957963 | 5.947843095 |

|          |                    |             |             |             |
|----------|--------------------|-------------|-------------|-------------|
| AP1B1    | ENSG00000100280.16 | 6.220779404 | 6.680826926 | 6.76597435  |
| SAAL1    | ENSG00000166788.9  | 6.681033912 | 5.922492282 | 5.569616674 |
| PRKAG1   | ENSG00000181929.11 | 7.479624536 | 6.461916375 | 6.019515412 |
| RNF40    | ENSG00000103549.21 | 6.317515486 | 5.594449513 | 5.93419919  |
| RFC2     | ENSG00000049541.10 | 6.505230242 | 6.050867733 | 5.444672369 |
| ACADM    | ENSG00000117054.13 | 5.922502592 | 5.655510497 | 5.916066007 |
| CDK1     | ENSG00000170312.15 | 7.079316627 | 5.497781992 | 5.809928729 |
| CPOX     | ENSG00000080819.6  | 6.168423392 | 5.708572956 | 5.587884193 |
| FOXK2    | ENSG00000141568.20 | 5.883973671 | 5.97241396  | 6.387284462 |
| STK10    | ENSG00000072786.12 | 5.883517884 | 5.593143498 | 6.804692478 |
| ALDH9A1  | ENSG00000143149.12 | 6.604783339 | 5.944893461 | 5.948540095 |
| GOLM1    | ENSG00000135052.16 | 6.8784789   | 7.568249645 | 5.529874076 |
| NMT1     | ENSG00000136448.11 | 5.985839095 | 5.79332916  | 6.088358343 |
| RETSAT   | ENSG00000042445.13 | 5.628271204 | 7.582323674 | 7.276103935 |
| CNPY3    | ENSG00000137161.16 | 5.448166752 | 6.543750566 | 5.854476129 |
| PMPCA    | ENSG00000165688.11 | 6.924477168 | 6.90075028  | 6.54396698  |
| NOP53    | ENSG00000105373.18 | 7.693591139 | 5.528245206 | 6.532209204 |
| MAPK1    | ENSG00000100030.14 | 5.433235211 | 6.129593836 | 5.534921533 |
| MRPS28   | ENSG00000147586.9  | 6.224914941 | 5.673496202 | 5.889003639 |
| SMPD4    | ENSG00000136699.19 | 5.646008575 | 6.366812138 | 5.443621824 |
| FBXO11   | ENSG00000138081.20 | 6.082462807 | 6.167128013 | 5.462803985 |
| MRPL35   | ENSG00000132313.14 | 5.753012928 | 6.020548339 | 5.510025693 |
| NOP2     | ENSG00000111641.11 | 6.87318163  | 6.076762417 | 5.770179302 |
| TUBA1C   | ENSG00000167553.15 | 8.398838913 | 7.857738322 | 5.541644267 |
| EFCAB14  | ENSG00000159658.10 | 5.461846124 | 6.205380082 | 5.698298686 |
| ZNF638   | ENSG00000075292.18 | 6.481413943 | 6.589297438 | 5.569938188 |
| GIGYF2   | ENSG00000204120.14 | 5.545532515 | 6.117149875 | 6.151239767 |
| NDE1     | ENSG00000072864.14 | 6.78898772  | 5.436604958 | 8.204002228 |
| SDAD1    | ENSG00000198301.11 | 5.706680986 | 5.823897468 | 5.522483018 |
| DPY19L1  | ENSG00000173852.14 | 5.931937971 | 6.261358551 | 5.653511196 |
| CSNK1G2  | ENSG00000133275.15 | 5.896256318 | 6.973579891 | 5.97062583  |
| UBE4B    | ENSG00000130939.18 | 6.030786616 | 6.080752522 | 6.001067444 |
| EIF4G3   | ENSG00000075151.20 | 6.628069956 | 6.97851     | 6.803681059 |
| CDC34    | ENSG00000099804.8  | 5.709802123 | 6.438518986 | 5.993762865 |
| PAPSS1   | ENSG00000138801.8  | 6.301772489 | 5.827636955 | 5.860570072 |
| ATP13A1  | ENSG00000105726.16 | 7.102608476 | 6.405714963 | 5.518890976 |
| FBXW11   | ENSG00000072803.17 | 6.24183892  | 5.45715233  | 6.186457836 |
| CYSTM1   | ENSG00000120306.9  | 5.723777079 | 6.479041122 | 7.05429699  |
| SACM1L   | ENSG00000211456.10 | 5.74829719  | 5.990177177 | 5.742777824 |
| BCL2L1   | ENSG00000171552.12 | 5.55406705  | 6.292869277 | 7.755352353 |
| COL4A3BP | ENSG00000113163.15 | 5.694453708 | 5.62939592  | 5.493239734 |
| MRPL44   | ENSG00000135900.3  | 5.46956824  | 6.641766957 | 6.536756817 |
| BAZ2A    | ENSG00000076108.11 | 6.352298919 | 6.576674034 | 6.27776136  |
| MBNL1    | ENSG00000152601.17 | 6.964033629 | 5.818458546 | 6.428103401 |
| GOLGA2   | ENSG00000167110.17 | 5.897236805 | 7.124376849 | 5.58596056  |
| MRPS22   | ENSG00000175110.11 | 6.596532204 | 5.972306942 | 5.49384358  |

|          |                    |             |             |             |
|----------|--------------------|-------------|-------------|-------------|
| NMD3     | ENSG00000169251.12 | 6.150368638 | 5.942623055 | 5.723502118 |
| PPIL1    | ENSG00000137168.7  | 5.862441944 | 5.706531758 | 5.824386084 |
| FNDC3A   | ENSG00000102531.16 | 5.761239831 | 6.724861116 | 5.713751025 |
| RRAGA    | ENSG00000155876.5  | 7.661193367 | 6.616928783 | 6.066899895 |
| ZNF593   | ENSG00000142684.8  | 6.237590003 | 6.877628746 | 6.074247802 |
| OPA1     | ENSG00000198836.8  | 5.474616679 | 6.737772719 | 6.042755603 |
| PFDN4    | ENSG00000101132.9  | 5.882233939 | 5.473115746 | 5.56842778  |
| ABCD3    | ENSG00000117528.11 | 5.943390464 | 5.448757261 | 6.256499272 |
| AAAS     | ENSG00000094914.12 | 6.523389569 | 5.685340072 | 5.491964964 |
| ELAVL1   | ENSG00000066044.14 | 6.255954824 | 5.584488499 | 5.480684362 |
| BLMH     | ENSG00000108578.14 | 7.064650005 | 5.806621595 | 5.453237613 |
| KIAA1191 | ENSG00000122203.14 | 5.896460684 | 6.514379451 | 6.369530113 |
| RUNX3    | ENSG00000020633.18 | 5.414837289 | 6.912578543 | 6.477657863 |
| DCPS     | ENSG00000110063.8  | 6.708780723 | 5.439253567 | 5.531294543 |
| NUDT1    | ENSG00000106268.15 | 5.722352713 | 6.435251051 | 5.53807307  |
| RPUSD3   | ENSG00000156990.14 | 6.862884005 | 6.048415146 | 5.679146448 |
| FAM91A1  | ENSG00000176853.15 | 5.867077472 | 6.020982876 | 5.791091347 |
| DIDO1    | ENSG00000101191.16 | 6.157995495 | 5.436615652 | 5.764942556 |
| KXD1     | ENSG00000105700.10 | 6.917458212 | 6.55324686  | 6.287351077 |
| PSMF1    | ENSG00000125818.17 | 6.423212624 | 6.405399256 | 5.533536805 |
| ARFGAP2  | ENSG00000149182.14 | 6.130329349 | 5.657752328 | 6.46928913  |
| COX14    | ENSG00000178449.8  | 6.221195062 | 5.689307031 | 5.681787184 |
| MGME1    | ENSG00000125871.13 | 5.575328912 | 5.533733152 | 5.49635853  |
| CLIP1    | ENSG00000130779.19 | 5.482002384 | 5.6944049   | 5.452836467 |
| PTCD3    | ENSG00000132300.18 | 5.492957334 | 5.978678619 | 5.409139814 |
| CHD1L    | ENSG00000131778.18 | 6.141215037 | 5.991319238 | 6.231762922 |
| DENND5A  | ENSG00000184014.7  | 5.503795543 | 6.185048176 | 5.920062628 |
| DEF8     | ENSG00000140995.16 | 5.923590754 | 6.131965638 | 6.424712297 |
| SLC23A2  | ENSG00000089057.14 | 5.827482863 | 6.753475988 | 6.565453493 |
| C19orf70 | ENSG00000174917.8  | 7.112950849 | 5.801238954 | 5.911175093 |
| JOSD1    | ENSG00000100221.10 | 5.495703129 | 6.391485553 | 5.975286017 |
| INCENP   | ENSG00000149503.12 | 7.049475889 | 5.891968216 | 5.394314879 |
| MRPL9    | ENSG00000143436.10 | 7.044226733 | 6.408744062 | 5.592276807 |
| RALBP1   | ENSG00000017797.12 | 5.727382305 | 6.55299135  | 6.061313381 |
| PYCR2    | ENSG00000143811.18 | 6.928313401 | 5.41632433  | 6.320312805 |
| SRSF2    | ENSG00000161547.16 | 6.953228854 | 6.007055262 | 5.801959547 |
| SEC13    | ENSG00000157020.17 | 7.122798172 | 7.359975274 | 5.48265514  |
| TPR      | ENSG00000047410.13 | 6.977123134 | 5.594404026 | 5.421116726 |
| NADK     | ENSG00000008130.15 | 5.770357453 | 5.97441329  | 5.44079064  |
| ERAL1    | ENSG00000132591.11 | 6.210329416 | 5.712983953 | 5.718500575 |
| VPS35    | ENSG00000069329.16 | 5.970099002 | 5.641436892 | 6.09291167  |
| ANKRD17  | ENSG00000132466.18 | 6.11916339  | 6.123219469 | 5.762670023 |
| IVD      | ENSG00000128928.8  | 6.183013153 | 6.06559673  | 5.426679885 |
| RNF7     | ENSG00000114125.13 | 5.686224987 | 6.49730001  | 5.759077567 |
| ANXA7    | ENSG00000138279.15 | 6.394220772 | 5.879576341 | 6.141321473 |
| PSMD7    | ENSG00000103035.10 | 7.550175341 | 6.360028884 | 6.560157767 |

|          |                    |             |             |             |
|----------|--------------------|-------------|-------------|-------------|
| PPID     | ENSG00000171497.4  | 6.45840929  | 5.378796052 | 5.724955679 |
| TRIM2    | ENSG00000109654.14 | 6.08942223  | 5.530682696 | 6.380492515 |
| DUS1L    | ENSG00000169718.17 | 6.117210095 | 6.850068622 | 6.349477493 |
| CTSC     | ENSG00000109861.15 | 7.581110297 | 6.554458328 | 5.379934517 |
| FADS1    | ENSG00000149485.18 | 6.523656031 | 5.820499428 | 5.484570463 |
| SPAG5    | ENSG00000076382.16 | 6.283270565 | 5.477313962 | 5.571977209 |
| PRPF4B   | ENSG00000112739.16 | 5.737240527 | 5.784934022 | 6.034196534 |
| SLU7     | ENSG00000164609.9  | 6.658933332 | 5.602388646 | 6.301073977 |
| PIP4K2B  | ENSG00000276293.4  | 5.411841755 | 5.589020819 | 6.237984922 |
| MGEA5    | ENSG00000198408.13 | 6.325741543 | 6.122487158 | 6.326409028 |
| TNFRSF1A | ENSG00000067182.7  | 7.218613057 | 5.6990646   | 5.709513185 |
| BOP1     | ENSG00000261236.7  | 7.008671408 | 6.165085746 | 5.455784475 |
| IFNGR2   | ENSG00000159128.14 | 6.001002133 | 5.57937067  | 5.735577844 |
| DNAJA3   | ENSG00000103423.13 | 6.209004323 | 6.049577874 | 6.492863113 |
| DDX56    | ENSG00000136271.10 | 7.241210022 | 7.010972958 | 5.839752654 |
| MTFR1L   | ENSG00000117640.17 | 5.848694276 | 6.038815627 | 5.852851016 |
| CTDSP2   | ENSG00000175215.10 | 6.565726399 | 5.727392098 | 8.51856153  |
| UBQLN4   | ENSG00000160803.7  | 6.373720061 | 5.633178806 | 5.388865593 |
| PDLIM7   | ENSG00000196923.13 | 6.568762402 | 5.376666227 | 5.602559396 |
| RNASEH1  | ENSG00000171865.9  | 6.13150772  | 6.032224706 | 5.451383584 |
| POLR2F   | ENSG00000100142.14 | 7.118326208 | 6.371164185 | 6.352867248 |
| SLC5A6   | ENSG00000138074.14 | 5.910147218 | 5.803656392 | 5.616613176 |
| MRPL41   | ENSG00000182154.7  | 6.397674368 | 7.333345972 | 6.336449274 |
| KLHDC3   | ENSG00000124702.17 | 7.228536396 | 5.729418273 | 5.571535556 |
| ATXN10   | ENSG00000130638.16 | 5.476013213 | 5.441651422 | 6.057369528 |
| BRD8     | ENSG00000112983.17 | 6.418998501 | 5.475662878 | 5.443507529 |
| PEF1     | ENSG00000162517.12 | 6.354234444 | 5.534945671 | 5.625815595 |
| PTRH2    | ENSG00000141378.14 | 5.920656189 | 6.465587178 | 5.868815441 |
| ERO1A    | ENSG00000197930.12 | 5.68645724  | 5.662275743 | 5.624600546 |
| CEBPZ    | ENSG00000115816.14 | 7.198293357 | 6.570777921 | 5.413415502 |
| MCRS1    | ENSG00000187778.13 | 6.629028664 | 5.43164132  | 5.645751297 |
| TIMM13   | ENSG00000099800.7  | 6.043264538 | 5.876026148 | 5.590025949 |
| GPBP1L1  | ENSG00000159592.10 | 6.350336846 | 5.604530866 | 5.61251818  |
| ITCH     | ENSG00000078747.14 | 6.191595392 | 5.932379241 | 6.095516761 |
| HDDC2    | ENSG00000111906.17 | 6.123363035 | 5.767652058 | 6.202961291 |
| ECE1     | ENSG00000117298.14 | 5.978961369 | 7.447892926 | 5.406178349 |
| DVL3     | ENSG00000161202.17 | 5.395835591 | 6.042503605 | 6.020982265 |
| HCFC1    | ENSG00000172534.13 | 6.537699706 | 5.707247336 | 5.604603841 |
| NRAS     | ENSG00000213281.4  | 6.274321533 | 5.990561993 | 5.927706925 |
| PPP1R7   | ENSG00000115685.14 | 5.635865226 | 5.940533761 | 5.869340518 |
| NUDT21   | ENSG00000167005.13 | 7.309558742 | 5.50504181  | 6.286228365 |
| CDK12    | ENSG00000167258.13 | 5.914576726 | 5.762147383 | 6.018863723 |
| SEC62    | ENSG00000008952.16 | 5.381556091 | 6.514497011 | 6.193606435 |
| GGT7     | ENSG00000131067.16 | 5.599395582 | 5.602317276 | 6.145291257 |
| SLC35C2  | ENSG00000080189.14 | 6.319008287 | 5.897335496 | 5.825907418 |
| TRIM25   | ENSG00000121060.16 | 6.250887379 | 6.315446226 | 5.993705893 |

|         |                    |             |             |             |
|---------|--------------------|-------------|-------------|-------------|
| RAE1    | ENSG00000101146.12 | 6.566109393 | 5.541909725 | 5.89252489  |
| LSG1    | ENSG00000041802.10 | 5.614167644 | 6.48700097  | 5.408503703 |
| SNHG7   | ENSG00000233016.6  | 7.158056984 | 6.950142499 | 6.709963603 |
| CIZ1    | ENSG00000148337.20 | 6.786424862 | 6.496119193 | 5.481746946 |
| ANXA6   | ENSG00000197043.13 | 5.387134754 | 6.615078535 | 7.356011155 |
| EIF1AX  | ENSG00000173674.10 | 6.58764437  | 5.411544785 | 5.577937661 |
| HMCES   | ENSG00000183624.13 | 6.57651196  | 5.578068164 | 5.584872525 |
| KPNA1   | ENSG00000114030.12 | 6.048697862 | 5.651948584 | 5.875027611 |
| MPRIIP  | ENSG00000133030.20 | 6.922962176 | 5.389379233 | 6.714670236 |
| KAT5    | ENSG00000172977.12 | 5.800063578 | 5.426996135 | 5.844559377 |
| NUP58   | ENSG00000139496.15 | 6.237687803 | 5.380600655 | 5.922178315 |
| MED8    | ENSG00000159479.16 | 6.422479751 | 6.029143926 | 5.495347962 |
| KIF23   | ENSG00000137807.13 | 6.382505222 | 5.493885145 | 5.801047746 |
| LSM10   | ENSG00000181817.5  | 6.277368083 | 5.997845491 | 5.879004237 |
| FAM234A | ENSG00000167930.15 | 6.177737815 | 5.460995802 | 5.555948426 |
| NDUFS4  | ENSG00000164258.11 | 6.825905576 | 5.428337207 | 6.405238208 |
| MED1    | ENSG00000125686.11 | 6.229651469 | 5.721418493 | 6.503770992 |
| PPFIA1  | ENSG00000131626.16 | 6.051303971 | 6.629142483 | 5.97175193  |
| TMEM259 | ENSG00000182087.12 | 5.442311176 | 6.897007584 | 5.92796483  |
| OSBP    | ENSG00000110048.11 | 5.891030705 | 5.732286894 | 6.005335557 |
| SCAF1   | ENSG00000126461.14 | 6.724247975 | 6.777971524 | 5.8488391   |
| SEPT10  | ENSG00000186522.14 | 5.485677195 | 6.338745113 | 6.287316574 |
| NCOR1   | ENSG00000141027.20 | 6.418476381 | 5.481155539 | 6.397153427 |
| IST1    | ENSG00000182149.20 | 6.092174739 | 6.68425083  | 7.179333345 |
| DVL2    | ENSG00000004975.11 | 6.011407027 | 5.389427556 | 5.400358897 |
| MCM6    | ENSG00000076003.4  | 6.377897061 | 5.865320315 | 5.459768018 |
| SKP1    | ENSG00000113558.18 | 7.644187795 | 5.916842626 | 7.359330284 |
| GLB1    | ENSG00000170266.15 | 5.729183632 | 6.782462321 | 5.420826344 |
| CCNL1   | ENSG00000163660.11 | 5.775700888 | 6.079142609 | 5.827054943 |
| NUTF2   | ENSG00000102898.11 | 7.065256581 | 5.578613328 | 6.205234335 |
| CHMP3   | ENSG00000115561.15 | 5.63724281  | 5.962927477 | 5.536507797 |
| SCARB1  | ENSG00000073060.15 | 7.207990831 | 8.277224145 | 9.066438028 |
| KDM1A   | ENSG00000004487.15 | 7.396644222 | 7.022155663 | 5.373239535 |
| RRAGC   | ENSG00000116954.7  | 5.388695286 | 5.604494157 | 5.67933802  |
| SP1     | ENSG00000185591.9  | 6.222366175 | 5.390649503 | 5.44017395  |
| TRMT10C | ENSG00000174173.6  | 6.848543222 | 6.135694847 | 5.377873698 |
| GTF2I   | ENSG00000263001.5  | 7.171649558 | 6.76183019  | 5.367236147 |
| ARL6IP4 | ENSG00000182196.13 | 6.33086529  | 5.431096145 | 7.062606777 |
| SEC23A  | ENSG00000100934.14 | 5.360025462 | 6.087379932 | 5.588430854 |
| FRG1    | ENSG00000109536.11 | 6.889448332 | 5.411397549 | 5.641869808 |
| NUP160  | ENSG00000030066.13 | 6.702844614 | 5.95974343  | 5.339823794 |
| SKA2    | ENSG00000182628.12 | 6.211472086 | 5.769850632 | 5.448331833 |
| UPP1    | ENSG00000183696.13 | 5.386470445 | 8.049121806 | 6.470015579 |
| DCAF13  | ENSG00000164934.13 | 6.633461398 | 5.332998206 | 5.601229231 |
| LPGAT1  | ENSG00000123684.12 | 6.086007143 | 5.35472366  | 6.125813344 |
| EMD     | ENSG00000102119.10 | 6.181373268 | 5.812875592 | 5.607818822 |

|          |                    |             |             |             |
|----------|--------------------|-------------|-------------|-------------|
| RBM10    | ENSG00000182872.15 | 6.487919903 | 5.75263829  | 5.337676773 |
| TOMM40   | ENSG00000130204.12 | 6.950799642 | 5.979104677 | 5.524900525 |
| SUCLG2   | ENSG00000172340.14 | 6.663518797 | 5.756974579 | 5.391359892 |
| TMEM14A  | ENSG00000096092.5  | 5.631423873 | 5.961479816 | 5.696963539 |
| CD320    | ENSG00000167775.10 | 7.108268918 | 6.383021476 | 5.770402435 |
| RERE     | ENSG00000142599.17 | 6.104263107 | 6.003347529 | 6.919333615 |
| WIPI2    | ENSG00000157954.14 | 6.321736189 | 6.690784815 | 5.794102611 |
| KIF1C    | ENSG00000129250.11 | 5.971189864 | 5.804134527 | 5.480018637 |
| UBE3A    | ENSG00000114062.18 | 6.505350664 | 6.620913771 | 6.750094063 |
| MTX2     | ENSG00000128654.13 | 5.479818639 | 6.476811493 | 6.463478927 |
| HMGCR    | ENSG00000113161.15 | 6.021241719 | 5.449036608 | 5.406358386 |
| NDUFA7   | ENSG00000267855.5  | 6.496852913 | 6.551329765 | 5.513184419 |
| TFPT     | ENSG00000105619.13 | 6.075043507 | 5.433020654 | 6.610412192 |
| MRPL45   | ENSG00000278845.4  | 6.591489836 | 6.32613625  | 6.330645731 |
| ATL2     | ENSG00000119787.13 | 5.495477352 | 5.448426759 | 5.45259813  |
| ZMIZ2    | ENSG00000122515.14 | 5.45979671  | 5.786651337 | 5.350614661 |
| USP48    | ENSG00000090686.15 | 5.517073393 | 7.332025416 | 7.074076475 |
| SMG7     | ENSG00000116698.21 | 6.353614186 | 5.436736566 | 5.715054053 |
| PRPS1    | ENSG00000147224.10 | 5.984608918 | 5.946020624 | 5.40984697  |
| PXDC1    | ENSG00000168994.13 | 5.701871432 | 5.461336257 | 5.654235338 |
| NR1H2    | ENSG00000131408.13 | 6.618475305 | 6.490256696 | 6.717030126 |
| RTN3     | ENSG00000133318.13 | 6.93266534  | 6.108322267 | 6.548731595 |
| COPS2    | ENSG00000166200.14 | 6.327064927 | 6.031922371 | 5.969654369 |
| GPBP1    | ENSG00000062194.15 | 6.069868626 | 5.353996154 | 5.591715616 |
| KEAP1    | ENSG00000079999.13 | 5.965582216 | 5.605547793 | 5.564024501 |
| SSH1     | ENSG00000084112.14 | 6.147193029 | 6.746718071 | 7.035433905 |
| PET100   | ENSG00000229833.9  | 6.254558346 | 5.763170171 | 5.659734241 |
| PCYT1A   | ENSG00000161217.11 | 5.456337115 | 5.787396839 | 5.483186989 |
| CTR9     | ENSG00000198730.7  | 5.734388477 | 5.793067411 | 5.309794085 |
| PBX2     | ENSG00000204304.11 | 5.716922863 | 6.266346052 | 5.677550371 |
| PKIG     | ENSG00000168734.13 | 5.951773475 | 5.378542658 | 5.924957477 |
| NFIC     | ENSG00000141905.18 | 6.220136034 | 6.254624601 | 5.748023122 |
| PARN     | ENSG00000140694.16 | 6.485717566 | 5.79527983  | 5.81695725  |
| MAN1B1   | ENSG00000177239.14 | 5.74645422  | 6.615005359 | 5.38014615  |
| ARMC1    | ENSG00000104442.9  | 5.966902986 | 5.396203228 | 5.804601415 |
| LONP2    | ENSG00000102910.13 | 5.373286647 | 5.360019297 | 6.106909734 |
| WDR74    | ENSG00000133316.15 | 6.955858129 | 5.495417454 | 5.721039495 |
| KIAA2013 | ENSG00000116685.15 | 6.040475835 | 6.407208183 | 5.659393701 |
| MRPL19   | ENSG00000115364.13 | 6.322778534 | 6.117810355 | 5.402721504 |
| ZNF106   | ENSG00000103994.16 | 5.748777431 | 6.839943554 | 8.456563174 |
| HCCS     | ENSG00000004961.14 | 6.24838698  | 5.39918204  | 5.370747286 |
| TMEM8A   | ENSG00000129925.10 | 5.363336085 | 6.845035647 | 7.042604337 |
| YIF1B    | ENSG00000167645.16 | 5.89871962  | 6.243865282 | 5.341798742 |
| ETV4     | ENSG00000175832.12 | 7.844048473 | 6.822436739 | 8.971186109 |
| UBAC2    | ENSG00000134882.15 | 6.155559886 | 5.580462527 | 6.160737229 |
| GPATCH4  | ENSG00000160818.16 | 7.447142459 | 6.287959216 | 5.393868905 |

|         |                    |             |             |             |
|---------|--------------------|-------------|-------------|-------------|
| FKBP9   | ENSG00000122642.10 | 5.716106734 | 6.853986791 | 6.798296033 |
| SCAMP4  | ENSG00000227500.9  | 5.309364056 | 5.973079544 | 5.854340994 |
| YES1    | ENSG00000176105.13 | 6.061843663 | 6.408754542 | 5.592474351 |
| PSME4   | ENSG00000068878.14 | 6.258611885 | 5.425432422 | 6.23825239  |
| SAP30BP | ENSG00000161526.14 | 5.759474563 | 5.623847925 | 6.105759399 |
| NUP93   | ENSG00000102900.12 | 6.751776612 | 7.322668299 | 6.063524145 |
| JPT1    | ENSG00000189159.15 | 7.237735102 | 5.501134402 | 6.270634233 |
| IP6K2   | ENSG00000068745.14 | 5.640394133 | 6.066757984 | 5.495902537 |
| SNX9    | ENSG00000130340.15 | 5.393608369 | 6.630092284 | 8.023675949 |
| ILKAP   | ENSG00000132323.8  | 5.342754807 | 6.862893438 | 5.454891652 |
| THOC5   | ENSG00000100296.13 | 6.94303167  | 7.030200069 | 6.6109175   |
| P4HA2   | ENSG00000072682.18 | 5.35147738  | 5.512656157 | 5.860248351 |
| CDKN1B  | ENSG00000111276.10 | 5.714821507 | 5.360867629 | 5.831633952 |
| TCTN3   | ENSG00000119977.20 | 5.822925164 | 5.918673036 | 5.56511542  |
| TAF13   | ENSG00000197780.9  | 7.153251667 | 6.527797946 | 5.796047608 |
| NELFE   | ENSG00000204356.13 | 6.669413241 | 6.851163698 | 5.648591398 |
| ATF6B   | ENSG00000213676.10 | 5.76056548  | 6.036481676 | 6.375404868 |
| NANS    | ENSG00000095380.10 | 6.558580512 | 7.696146648 | 5.387162895 |
| DMTF1   | ENSG00000135164.18 | 5.429596395 | 6.11108183  | 5.688270212 |
| GRHPR   | ENSG00000137106.17 | 6.833432655 | 6.882079186 | 5.961145772 |
| FAM49B  | ENSG00000153310.19 | 6.251185511 | 6.328610427 | 5.306400696 |
| EPB41L2 | ENSG00000079819.18 | 6.293343543 | 5.897625349 | 5.716764009 |
| DHCR7   | ENSG00000172893.15 | 5.422210352 | 6.109165355 | 6.099331715 |
| VPS4B   | ENSG00000119541.9  | 5.653946775 | 6.280206076 | 5.597116944 |
| SMARCD1 | ENSG00000066117.14 | 6.997353598 | 6.121047835 | 5.812977771 |
| FARP2   | ENSG00000006607.13 | 5.467304029 | 7.314342953 | 6.738518028 |
| MYO9B   | ENSG00000099331.13 | 6.351047633 | 7.685763733 | 6.285698255 |
| SDF2L1  | ENSG00000128228.4  | 5.579920454 | 6.270531579 | 5.501631379 |
| PLOD2   | ENSG00000152952.11 | 5.641681395 | 5.320634543 | 5.913151306 |
| MBD3    | ENSG00000071655.17 | 6.452643217 | 5.58474336  | 5.803933504 |
| TAOK3   | ENSG00000135090.13 | 5.308936725 | 5.845928255 | 7.22535049  |
| TIPRL   | ENSG00000143155.12 | 6.85991723  | 6.617553488 | 5.284030714 |
| UBE2E3  | ENSG00000170035.15 | 5.587882089 | 5.946505538 | 6.459820569 |
| MTHFD2  | ENSG00000065911.11 | 6.921029491 | 5.745709845 | 6.278174561 |
| RANBP2  | ENSG00000153201.15 | 5.32661108  | 6.108450291 | 6.143028701 |
| USP19   | ENSG00000172046.18 | 6.493312359 | 6.049859273 | 5.546927693 |
| PIZO1   | ENSG00000103335.21 | 5.963985792 | 5.526573152 | 6.009093582 |
| SMIM30  | ENSG00000214194.8  | 5.368011508 | 7.274806937 | 6.315339984 |
| SCAMP2  | ENSG00000140497.16 | 5.496598087 | 6.155948046 | 6.61902177  |
| HS1BP3  | ENSG00000118960.12 | 5.308272853 | 6.211678538 | 5.366456765 |
| MFSD14B | ENSG00000148110.15 | 6.009680711 | 7.46842623  | 5.282530901 |
| PLEKHB2 | ENSG00000115762.16 | 5.315055097 | 6.466060886 | 6.817931482 |
| LRRC58  | ENSG00000163428.3  | 6.295529212 | 5.610534953 | 5.322471189 |
| HECTD1  | ENSG00000092148.12 | 5.890759252 | 5.92161265  | 5.851167255 |
| SDCCAG3 | ENSG00000165689.16 | 6.625920017 | 6.119465789 | 5.941204632 |
| MRPS9   | ENSG00000135972.8  | 5.343091046 | 6.251023494 | 5.781672041 |



|          |                    |             |             |             |
|----------|--------------------|-------------|-------------|-------------|
| TXN2     | ENSG00000100348.9  | 6.481216465 | 6.24445221  | 6.335317636 |
| ALAS1    | ENSG00000023330.14 | 5.921875474 | 6.505226216 | 5.888012924 |
| IAH1     | ENSG00000134330.18 | 5.411135893 | 6.112481332 | 5.27287716  |
| LARP4    | ENSG00000161813.21 | 6.655237409 | 6.13371087  | 5.939147451 |
| KPNA3    | ENSG00000102753.9  | 6.097597056 | 5.412191148 | 5.304925335 |
| RHOC     | ENSG00000155366.16 | 7.058849036 | 6.582695154 | 5.561088004 |
| CALM3    | ENSG00000160014.16 | 6.459847607 | 5.619706589 | 7.50336011  |
| ALG8     | ENSG00000159063.12 | 6.254913339 | 5.578015618 | 5.658090045 |
| SMC4     | ENSG00000113810.15 | 7.30856516  | 6.409805171 | 5.293139671 |
| MBD6     | ENSG00000166987.14 | 5.800666786 | 5.679458598 | 8.244117814 |
| ATAD3A   | ENSG00000197785.13 | 6.306295845 | 6.344161622 | 5.489013904 |
| TIA1     | ENSG00000116001.15 | 5.599248516 | 5.455970516 | 5.267624065 |
| PREPL    | ENSG00000138078.15 | 5.534186102 | 5.963609198 | 6.404633044 |
| ZC3H7B   | ENSG00000100403.11 | 5.375189255 | 5.450238704 | 6.678116928 |
| MET      | ENSG00000105976.14 | 6.051717628 | 6.787787314 | 6.327704158 |
| C9orf78  | ENSG00000136819.15 | 7.062744731 | 7.068998007 | 5.305744516 |
| MESD     | ENSG00000117899.10 | 5.280903007 | 5.39951197  | 5.555848801 |
| USP1     | ENSG00000162607.12 | 6.473637599 | 5.31509072  | 5.313843944 |
| CBX4     | ENSG00000141582.14 | 5.548369951 | 6.454099588 | 7.055780366 |
| COMMD7   | ENSG00000149600.11 | 5.427716738 | 5.397039955 | 6.618575871 |
| MCAM     | ENSG00000076706.16 | 6.937862261 | 8.2913978   | 7.084943368 |
| SNRPB2   | ENSG00000125870.10 | 8.532612682 | 6.867490402 | 5.295072403 |
| C19orf24 | ENSG00000228300.13 | 5.378091161 | 6.157016468 | 6.404100386 |
| SARNP    | ENSG00000205323.8  | 5.999153065 | 5.646904071 | 5.399917865 |
| MRPL2    | ENSG00000112651.11 | 5.842288283 | 5.442299658 | 5.621708227 |
| FN1      | ENSG00000115414.18 | 5.324256319 | 9.176693359 | 10.29482995 |
| MICAL3   | ENSG00000243156.7  | 5.690332776 | 6.586386402 | 6.702462459 |
| IWS1     | ENSG00000163166.14 | 5.397074166 | 6.405076606 | 5.930258735 |
| RPA1     | ENSG00000132383.11 | 6.613088836 | 5.315598239 | 5.739042314 |
| MAP2K1   | ENSG00000169032.9  | 5.945259387 | 5.443449687 | 5.830830496 |
| MYL6B    | ENSG00000196465.10 | 6.700873269 | 5.802936329 | 5.544460745 |
| APIP     | ENSG00000149089.12 | 5.743061873 | 5.597498549 | 5.600190775 |
| CHERP    | ENSG00000085872.14 | 6.8768568   | 6.54265529  | 5.303754589 |
| LRRFIP2  | ENSG00000093167.17 | 6.470940633 | 5.724868422 | 5.348451801 |
| FOSL1    | ENSG00000175592.8  | 8.295182303 | 5.526936601 | 6.255662251 |
| SLC7A1   | ENSG00000139514.12 | 6.465873801 | 6.540821408 | 7.125925083 |
| ELAC2    | ENSG00000006744.18 | 7.059050186 | 5.349390798 | 5.533288924 |
| PNPLA2   | ENSG00000177666.16 | 6.428093979 | 6.07395586  | 6.155062813 |
| NUP62    | ENSG00000213024.11 | 6.131886484 | 6.385350308 | 5.406540341 |
| USP16    | ENSG00000156256.14 | 5.621619524 | 5.478381208 | 6.231024433 |
| TPP2     | ENSG00000134900.11 | 5.819307236 | 5.323149416 | 5.390687353 |
| SLC39A14 | ENSG00000104635.13 | 5.977926366 | 6.577540692 | 7.620855055 |
| RPS19BP1 | ENSG00000187051.8  | 5.434215288 | 5.371854167 | 5.696249094 |
| GTF2B    | ENSG00000137947.11 | 5.589608098 | 5.391470252 | 5.373847459 |
| INTS13   | ENSG00000064102.14 | 5.998899432 | 5.325438013 | 5.822368866 |
| ACAP3    | ENSG00000131584.18 | 5.248986803 | 5.47882221  | 6.050302867 |

|            |                    |             |             |             |
|------------|--------------------|-------------|-------------|-------------|
| LIMK1      | ENSG00000106683.14 | 5.524857985 | 8.021870293 | 6.20483761  |
| PAK1IP1    | ENSG00000111845.4  | 6.093248794 | 5.275258717 | 5.506079418 |
| GTPBP4     | ENSG00000107937.18 | 6.509591949 | 5.468709047 | 5.305088447 |
| GOLGA7     | ENSG00000147533.16 | 5.431099033 | 5.669657371 | 6.287984244 |
| RPA2       | ENSG00000117748.9  | 6.550200431 | 5.82056595  | 5.367936523 |
| SOX10      | ENSG00000100146.16 | 9.447967728 | 8.806414129 | 8.674512248 |
| HUWE1      | ENSG00000086758.15 | 7.296937861 | 6.933407452 | 7.020577252 |
| RNF130     | ENSG00000113269.13 | 5.991880321 | 6.123342675 | 5.939611165 |
| SCCPDH     | ENSG00000143653.9  | 6.684571973 | 6.399993377 | 5.587099706 |
| CHAMP1     | ENSG00000198824.5  | 6.609882142 | 5.607857332 | 5.563738318 |
| AKAP12     | ENSG00000131016.16 | 7.87301605  | 5.626992808 | 7.381239891 |
| USP9X      | ENSG00000124486.12 | 5.579973361 | 5.554773154 | 5.884853706 |
| SLBP       | ENSG00000163950.12 | 6.800970932 | 5.255714786 | 7.283567618 |
| GADD45GIP1 | ENSG00000179271.2  | 6.66672378  | 5.338674153 | 5.478373624 |
| ASNS       | ENSG00000070669.16 | 7.235171555 | 6.057003085 | 7.750024562 |
| CMTR1      | ENSG00000137200.12 | 5.299453559 | 5.584764509 | 5.277337386 |
| RYK        | ENSG00000163785.12 | 6.289800915 | 5.840013653 | 5.545414715 |
| INTS3      | ENSG00000143624.13 | 6.431345248 | 6.807693709 | 5.398483926 |
| NOL10      | ENSG00000115761.15 | 6.490687681 | 5.605040128 | 5.243599579 |
| GNG10      | ENSG00000242616.3  | 5.616072069 | 6.449393896 | 5.668675006 |
| LANCL1     | ENSG00000115365.11 | 5.303132943 | 6.127838159 | 6.30205795  |
| BUB1       | ENSG00000169679.14 | 6.210413766 | 5.919963425 | 5.266476191 |
| SF3B3      | ENSG00000189091.12 | 7.24324584  | 6.035294475 | 5.714279493 |
| UBL4A      | ENSG00000102178.12 | 6.332074379 | 5.719070548 | 5.608386122 |
| MLH1       | ENSG00000076242.14 | 6.07492951  | 5.335276685 | 5.607941594 |
| PSME2      | ENSG00000100911.15 | 6.613382058 | 5.38038363  | 5.759544681 |
| RN7SK      | ENSG00000283293.1  | 6.545819847 | 5.449013003 | 6.276234663 |
| SENP3      | ENSG00000161956.12 | 7.023477107 | 6.064812118 | 5.980265594 |
| C11orf84   | ENSG00000168005.8  | 6.028091394 | 5.518568561 | 5.329436292 |
| CYB561A3   | ENSG00000162144.9  | 6.357659698 | 5.980948958 | 5.99476015  |
| HPS1       | ENSG00000107521.18 | 5.863092976 | 5.365722412 | 6.010032758 |
| NUFIP2     | ENSG00000108256.8  | 5.702942621 | 6.043928936 | 6.283430512 |
| PSMG2      | ENSG00000128789.20 | 6.054395107 | 6.526179532 | 5.931694668 |
| CUL4B      | ENSG00000158290.16 | 5.793332399 | 5.603269944 | 5.604108867 |
| IDH3B      | ENSG00000101365.20 | 6.768941082 | 6.484497141 | 5.284724046 |
| FAR1       | ENSG00000197601.12 | 5.253897934 | 5.260082466 | 5.341795413 |
| COX15      | ENSG00000014919.12 | 6.437629818 | 5.725386091 | 5.478403462 |
| IGF2BP3    | ENSG00000136231.13 | 7.180054403 | 6.327107394 | 6.849846241 |
| COL9A3     | ENSG00000092758.15 | 8.552007809 | 8.162544192 | 8.685680313 |
| IRF2BP2    | ENSG00000168264.10 | 6.059887368 | 5.238567463 | 5.838117293 |
| TRIB3      | ENSG00000101255.10 | 6.338770759 | 6.22979424  | 7.614121094 |
| MAPKAPK3   | ENSG00000114738.10 | 5.545311818 | 6.113225823 | 5.262745083 |
| RTF1       | ENSG00000137815.14 | 5.92542501  | 5.674934581 | 5.307914044 |
| CHD8       | ENSG00000100888.12 | 5.937637453 | 5.387271566 | 5.320870693 |
| PDS5A      | ENSG00000121892.14 | 6.569297834 | 5.307392621 | 7.023185773 |
| SUCLA2     | ENSG00000136143.14 | 5.79002112  | 5.279246631 | 5.343680801 |

|          |                    |             |             |             |
|----------|--------------------|-------------|-------------|-------------|
| EPHX1    | ENSG00000143819.12 | 5.29734317  | 5.892555003 | 5.797573357 |
| SELENOS  | ENSG00000131871.14 | 5.828819168 | 6.554971837 | 5.985239061 |
| RHOG     | ENSG00000177105.9  | 5.984259507 | 6.236784436 | 6.086368212 |
| VMA21    | ENSG00000160131.13 | 6.125032401 | 5.519662972 | 5.578382687 |
| TMEM208  | ENSG00000168701.18 | 6.200838697 | 5.726359153 | 5.691814689 |
| MMGT1    | ENSG00000169446.5  | 5.570894454 | 5.663154366 | 5.576026034 |
| GALNT11  | ENSG00000178234.12 | 5.25023917  | 5.895147799 | 6.152925685 |
| PNKP     | ENSG00000039650.11 | 6.053698806 | 6.064398999 | 5.750330087 |
| OTUB1    | ENSG00000167770.11 | 6.187197914 | 5.949037321 | 5.966088267 |
| YLPM1    | ENSG00000119596.17 | 5.916965532 | 5.207206451 | 5.772805137 |
| AKT3     | ENSG00000117020.16 | 6.55053077  | 5.297882821 | 6.739556257 |
| MRPL27   | ENSG00000108826.15 | 6.086244602 | 5.829924828 | 5.650549361 |
| DNAJC2   | ENSG00000105821.14 | 6.285735595 | 6.316133706 | 5.252741923 |
| HDGFL2   | ENSG00000167674.14 | 6.218018575 | 6.39674073  | 5.382316868 |
| DHX36    | ENSG00000174953.13 | 6.503672595 | 5.796163759 | 5.39591598  |
| PARL     | ENSG00000175193.13 | 5.447944097 | 6.153757406 | 6.151830608 |
| USP32    | ENSG00000170832.12 | 5.305331818 | 6.212585628 | 5.870440886 |
| WLS      | ENSG00000116729.13 | 6.363381663 | 5.878107201 | 5.458238286 |
| COQ9     | ENSG00000088682.13 | 6.226290318 | 5.332391759 | 6.165724985 |
| XPO5     | ENSG00000124571.17 | 6.216355051 | 5.831155567 | 5.534042744 |
| GMPPA    | ENSG00000144591.18 | 5.230983706 | 6.628793595 | 5.589402961 |
| PRKCD    | ENSG00000163932.13 | 6.53704358  | 7.117690323 | 5.230057224 |
| DIABLO   | ENSG00000184047.16 | 6.240715797 | 5.509476517 | 5.446764024 |
| AIMP1    | ENSG00000164022.16 | 5.860026852 | 5.353682306 | 5.467338291 |
| ZC3HAV1  | ENSG00000105939.12 | 5.472913076 | 5.492977779 | 5.217132911 |
| RANBP9   | ENSG00000010017.12 | 5.356244381 | 5.66374627  | 6.692910139 |
| ODC1     | ENSG00000115758.12 | 5.59273692  | 7.111628527 | 8.60694385  |
| TRIP10   | ENSG00000125733.17 | 5.63892951  | 5.450343941 | 5.36780149  |
| BSCL2    | ENSG00000168000.14 | 6.240560641 | 5.407582915 | 5.965340833 |
| ACSS2    | ENSG00000131069.19 | 5.940451682 | 5.347705757 | 6.578275698 |
| SLTM     | ENSG00000137776.16 | 6.894534014 | 5.904697493 | 6.222026135 |
| XRN2     | ENSG00000088930.7  | 7.157138308 | 6.919428217 | 5.255262776 |
| ARV1     | ENSG00000173409.13 | 6.334466367 | 5.274041213 | 5.31451842  |
| PIP4K2C  | ENSG00000166908.17 | 5.508603711 | 6.021077086 | 8.08881545  |
| NNT      | ENSG00000112992.16 | 5.825462055 | 6.450058818 | 6.519281054 |
| DYNLL2   | ENSG00000264364.2  | 5.325195211 | 5.438828417 | 6.374954329 |
| NIPSNAP2 | ENSG00000146729.9  | 6.177539851 | 5.513129345 | 6.074065888 |
| GMPS     | ENSG00000163655.15 | 6.14937157  | 5.463702735 | 5.407331918 |
| DDX41    | ENSG00000183258.11 | 5.805570656 | 5.397137222 | 5.909876264 |
| SPR      | ENSG00000116096.5  | 5.611030862 | 6.654736529 | 5.392711    |
| DERA     | ENSG00000023697.12 | 5.743662378 | 5.658359474 | 6.38501772  |
| RBFOX2   | ENSG00000100320.22 | 6.018720774 | 6.359835845 | 6.586739176 |
| PCMTD2   | ENSG00000203880.11 | 6.188985558 | 5.25804617  | 6.521604151 |
| CCDC43   | ENSG00000180329.13 | 5.78015797  | 5.558837731 | 5.666492485 |
| C21orf59 | ENSG00000159079.18 | 6.138076161 | 5.324141879 | 6.003517722 |
| CDC23    | ENSG00000094880.10 | 6.227412362 | 5.203388106 | 5.305147007 |

|          |                    |             |             |             |
|----------|--------------------|-------------|-------------|-------------|
| CCNB2    | ENSG00000157456.7  | 6.765040483 | 5.594379276 | 5.246658623 |
| COPS7A   | ENSG00000111652.9  | 6.212746607 | 6.015786267 | 6.676079353 |
| TYK2     | ENSG00000105397.13 | 6.425302122 | 5.841486227 | 6.086023495 |
| DDX49    | ENSG00000105671.11 | 7.372012093 | 6.128983921 | 5.26297558  |
| WDR45    | ENSG00000196998.17 | 6.521915674 | 5.98757756  | 5.362399544 |
| RIC8A    | ENSG00000177963.14 | 5.685288274 | 6.036166007 | 5.392512455 |
| DHCR24   | ENSG00000116133.11 | 6.831017667 | 6.376273285 | 5.823518021 |
| CRKL     | ENSG00000099942.12 | 5.202806085 | 5.925495022 | 5.904166147 |
| NUP153   | ENSG00000124789.11 | 5.780104643 | 5.226957106 | 5.44666199  |
| VAPA     | ENSG00000101558.13 | 5.824741607 | 6.221233548 | 5.752935689 |
| COPS8    | ENSG00000198612.10 | 5.617518908 | 6.491831309 | 6.447154909 |
| SNX4     | ENSG00000114520.10 | 5.506630661 | 5.590843504 | 5.189126888 |
| ATP6V0A1 | ENSG00000033627.16 | 5.577049861 | 6.652570944 | 8.253814449 |
| NDUFAF3  | ENSG00000178057.14 | 5.55361221  | 6.208530398 | 5.616577756 |
| PIH1D1   | ENSG00000104872.10 | 7.003827792 | 6.396370706 | 5.983481617 |
| EXOC4    | ENSG00000131558.14 | 5.316121857 | 6.091446698 | 6.034448209 |
| DHX8     | ENSG00000067596.10 | 6.722075348 | 5.888993234 | 5.738150613 |
| GOLIM4   | ENSG00000173905.8  | 5.497274114 | 5.9582824   | 5.668651075 |
| EMC1     | ENSG00000127463.14 | 5.98657692  | 6.389206558 | 5.322101935 |
| RPS6KA4  | ENSG00000162302.12 | 5.309185969 | 5.815965192 | 5.434471609 |
| SAFB2    | ENSG00000130254.11 | 6.386712859 | 5.260505504 | 5.489872772 |
| ACP1     | ENSG00000143727.15 | 6.521352059 | 6.558534923 | 5.395853428 |
| INTS8    | ENSG00000164941.13 | 5.762709872 | 5.641823159 | 5.349406345 |
| DCAF7    | ENSG00000136485.14 | 6.126594192 | 5.96093365  | 6.096348724 |
| POP5     | ENSG00000167272.10 | 6.198234126 | 6.081335609 | 6.135103776 |
| BCLAF1   | ENSG00000029363.16 | 6.535383755 | 5.454143179 | 5.543073878 |
| RAB12    | ENSG00000206418.3  | 5.62425176  | 6.06987631  | 5.607212211 |
| DGKZ     | ENSG00000149091.15 | 5.796425419 | 5.674756713 | 6.469721125 |
| RBM22    | ENSG00000086589.11 | 6.346072544 | 5.315462704 | 6.217235951 |
| RRP1B    | ENSG00000160208.12 | 5.756051731 | 5.667656503 | 5.475504786 |
| MRPL52   | ENSG00000172590.18 | 5.448492544 | 5.521869711 | 5.316849698 |
| COPS3    | ENSG00000141030.12 | 6.976920999 | 5.315571851 | 5.703531287 |
| RHBDD2   | ENSG00000005486.16 | 5.348976027 | 6.694360726 | 5.502930024 |
| ZFPL1    | ENSG00000162300.11 | 5.653203251 | 5.574418827 | 5.418359254 |
| AKAP8L   | ENSG00000011243.17 | 5.721417723 | 5.983171274 | 5.89981187  |
| PBRM1    | ENSG00000163939.18 | 5.628819188 | 5.735702697 | 5.309053009 |
| TM9SF4   | ENSG00000101337.15 | 5.355073031 | 6.109601989 | 6.59912665  |
| ATP6AP2  | ENSG00000182220.14 | 5.543129618 | 5.424225231 | 5.39284066  |
| CARS     | ENSG00000110619.17 | 6.577738203 | 6.10228889  | 7.300268286 |
| ARAP1    | ENSG00000186635.14 | 5.28376247  | 5.8337541   | 6.370146192 |
| ADGRE5   | ENSG00000123146.19 | 6.911514903 | 6.489660585 | 5.222361779 |
| NUDT5    | ENSG00000165609.12 | 6.521678814 | 5.46744246  | 5.235813105 |
| GSK3B    | ENSG00000082701.14 | 6.432243211 | 5.500813251 | 5.47621824  |
| SQLE     | ENSG00000104549.11 | 5.227992035 | 5.969769879 | 6.634346915 |
| FUBP3    | ENSG00000107164.15 | 7.023551712 | 6.735952005 | 5.186267146 |
| PPP1R12C | ENSG00000125503.12 | 5.581702203 | 5.293992748 | 5.799364025 |

|          |                    |             |             |             |
|----------|--------------------|-------------|-------------|-------------|
| JUND     | ENSG00000130522.5  | 6.263191221 | 6.237129259 | 6.232359984 |
| GPR137B  | ENSG00000077585.13 | 5.472586716 | 7.97744578  | 7.108268564 |
| MUL1     | ENSG00000090432.6  | 5.738019633 | 5.634812987 | 5.745479205 |
| PPP4R2   | ENSG00000163605.14 | 6.282008714 | 5.91177736  | 5.175915078 |
| NPM3     | ENSG00000107833.10 | 6.74019699  | 6.003950783 | 5.23578455  |
| LSM2     | ENSG00000204392.10 | 6.131345318 | 5.172802886 | 6.14928852  |
| MAX      | ENSG00000125952.18 | 6.409249794 | 6.173200401 | 5.629324452 |
| IGSF3    | ENSG00000143061.17 | 5.303119408 | 6.604010727 | 6.54131694  |
| NDRG3    | ENSG00000101079.20 | 5.604127122 | 5.506573802 | 6.497683338 |
| HSPA13   | ENSG00000155304.5  | 5.195965477 | 5.444863737 | 6.793017271 |
| SEC22C   | ENSG00000093183.13 | 5.597124229 | 5.914496935 | 5.511193053 |
| PHF23    | ENSG00000040633.12 | 6.628102692 | 6.469178723 | 5.737327167 |
| UBAC1    | ENSG00000130560.8  | 6.208218544 | 6.430504304 | 6.321534127 |
| TBL1XR1  | ENSG00000177565.16 | 6.206156935 | 6.546593931 | 5.764269261 |
| CARM1    | ENSG00000142453.11 | 6.818366746 | 5.906174018 | 5.14246755  |
| TAOK1    | ENSG00000160551.11 | 5.44066658  | 5.802114714 | 5.892086239 |
| CNDP2    | ENSG00000133313.14 | 5.398446742 | 6.403958049 | 5.717227269 |
| PARP4    | ENSG00000102699.5  | 6.327271942 | 5.886723638 | 5.174830925 |
| SEC14L1  | ENSG00000129657.14 | 5.340719827 | 5.790968847 | 8.506543167 |
| DYNC1I2  | ENSG00000077380.15 | 5.248426177 | 6.998867616 | 6.545610922 |
| PLRG1    | ENSG00000171566.11 | 6.301136439 | 5.224601692 | 5.407992196 |
| DCTN3    | ENSG00000137100.15 | 6.642251854 | 5.226258984 | 5.79328351  |
| LRWD1    | ENSG00000161036.12 | 6.258302446 | 5.485550336 | 5.33310671  |
| HTATSF1  | ENSG00000102241.11 | 6.641960187 | 5.647531541 | 5.973073597 |
| HSD17B11 | ENSG00000198189.10 | 5.268759121 | 5.658692179 | 6.324120575 |
| RHOBTB3  | ENSG00000164292.12 | 5.24349269  | 5.286387821 | 5.906198233 |
| DENND4B  | ENSG00000198837.9  | 6.287145622 | 5.859252714 | 5.346357889 |
| METAP2   | ENSG00000111142.13 | 7.525512501 | 6.468610697 | 5.426781676 |
| MINK1    | ENSG00000141503.15 | 5.290519187 | 5.214486822 | 5.817033971 |
| PPA2     | ENSG00000138777.19 | 6.106104457 | 5.225713852 | 5.91349109  |
| JMJD6    | ENSG00000070495.14 | 5.376492643 | 5.733808472 | 6.463710764 |
| DNTTIP1  | ENSG00000101457.12 | 6.599095627 | 5.41323434  | 5.737268072 |
| TIAL1    | ENSG00000151923.17 | 7.470594218 | 5.948982686 | 5.968954118 |
| PTDSS1   | ENSG00000156471.12 | 6.00670285  | 5.19397462  | 5.523219968 |
| COL6A1   | ENSG00000142156.14 | 7.217453908 | 5.68485033  | 5.709341944 |
| PBDC1    | ENSG00000102390.10 | 5.656304789 | 5.944670827 | 5.947988219 |
| USP36    | ENSG00000055483.19 | 5.30620488  | 6.885484242 | 6.315085476 |
| ZDHHC4   | ENSG00000136247.14 | 6.303491644 | 5.866773422 | 6.143094668 |
| AGPS     | ENSG00000018510.13 | 5.700725256 | 5.83239666  | 5.177630574 |
| SKIV2L2  | ENSG00000039123.15 | 6.744053764 | 5.771016739 | 5.141004865 |
| PAM      | ENSG00000145730.20 | 6.783282726 | 7.151896752 | 7.166500749 |
| AIP      | ENSG00000110711.9  | 6.936621016 | 5.300105625 | 6.825403724 |
| NDUFA6   | ENSG00000184983.9  | 5.665502305 | 6.934555675 | 6.433256822 |
| USP11    | ENSG00000102226.9  | 6.997723459 | 6.235247703 | 5.188434439 |
| ILVBL    | ENSG00000105135.15 | 5.864194789 | 6.542747552 | 5.256253548 |
| SLC25A32 | ENSG00000164933.11 | 6.069171328 | 5.646267263 | 5.781442634 |

|           |                    |             |             |             |
|-----------|--------------------|-------------|-------------|-------------|
| PQBP1     | ENSG00000102103.15 | 6.785949294 | 5.983234375 | 5.290075563 |
| PPP1CB    | ENSG00000213639.9  | 7.467298088 | 7.864876408 | 6.072756135 |
| MYBL2     | ENSG00000101057.15 | 7.370772715 | 5.719473597 | 5.154012625 |
| RHOB      | ENSG00000143878.9  | 6.995946371 | 7.725062481 | 6.1013814   |
| ECM1      | ENSG00000143369.14 | 5.161557081 | 6.722523104 | 6.781487163 |
| PLXNA1    | ENSG00000114554.11 | 5.141575368 | 7.359017583 | 7.643713653 |
| AGTRAP    | ENSG00000177674.15 | 5.215500662 | 5.637539162 | 6.153688686 |
| SLC31A1   | ENSG00000136868.10 | 5.394867708 | 7.746063787 | 5.242392693 |
| CSTF3     | ENSG00000176102.11 | 6.01784195  | 5.371337559 | 5.30554018  |
| CENPB     | ENSG00000125817.7  | 7.343280958 | 7.117379185 | 5.281261484 |
| GLYR1     | ENSG00000140632.16 | 5.892667403 | 5.201525436 | 5.607151205 |
| NSMCE2    | ENSG00000156831.7  | 5.484354784 | 5.15498923  | 5.363332359 |
| CSTF1     | ENSG00000101138.11 | 5.754009332 | 5.513263613 | 5.902097593 |
| TBK1      | ENSG00000183735.9  | 5.683716647 | 5.3209017   | 5.582952646 |
| CLASP1    | ENSG00000074054.17 | 5.212293799 | 5.389225866 | 5.627134845 |
| ZSWIM8    | ENSG00000214655.10 | 5.769280434 | 5.281715568 | 6.043052861 |
| GPR137    | ENSG00000173264.14 | 6.152176233 | 5.201733687 | 5.844407081 |
| GYS1      | ENSG00000104812.14 | 6.54582543  | 7.457073908 | 5.282771665 |
| GLT8D1    | ENSG00000016864.18 | 6.591991605 | 6.090271089 | 5.362716868 |
| MED25     | ENSG00000104973.16 | 6.145117998 | 6.087521946 | 5.783504367 |
| PSMD10    | ENSG00000101843.18 | 5.917794953 | 6.033329707 | 6.047235202 |
| MAPK6     | ENSG00000069956.11 | 6.069437304 | 5.540920005 | 6.137746542 |
| LYAR      | ENSG00000145220.13 | 7.17777249  | 5.145292397 | 6.300694254 |
| PLEC      | ENSG00000178209.14 | 7.542318539 | 8.028422476 | 5.18460417  |
| MSANTD3   | ENSG00000066697.14 | 6.063164108 | 7.027776114 | 5.26756472  |
| SPTLC1    | ENSG00000090054.13 | 6.293619495 | 7.090082893 | 5.245944379 |
| APEX1     | ENSG00000100823.11 | 6.160158779 | 5.466618296 | 5.127274453 |
| OSTF1     | ENSG00000134996.11 | 5.502945806 | 5.80426218  | 5.160211283 |
| TAF1D     | ENSG00000166012.16 | 6.710579091 | 5.129444558 | 6.196135541 |
| FOPNL     | ENSG00000133393.12 | 5.434018882 | 5.448091249 | 5.250966642 |
| TNFRSF10B | ENSG00000120889.12 | 6.110095579 | 7.253831414 | 7.881486769 |
| IER3      | ENSG00000137331.11 | 8.502521537 | 8.82160106  | 7.64083212  |
| MAPKAP1   | ENSG00000119487.16 | 6.130095174 | 6.713437654 | 5.380454941 |
| WDR55     | ENSG00000120314.18 | 5.728463697 | 5.477527457 | 5.231969734 |
| GPS2      | ENSG00000132522.15 | 6.513189318 | 5.207870431 | 5.672951331 |
| ANKIB1    | ENSG00000001629.9  | 5.715241536 | 5.805460177 | 5.111610619 |
| RRM2      | ENSG00000171848.14 | 7.602782351 | 5.796021594 | 5.18406161  |
| GLG1      | ENSG00000090863.11 | 6.42010511  | 6.096516631 | 6.02218892  |
| SNRPA     | ENSG00000077312.8  | 6.395596179 | 6.11499817  | 5.198342158 |
| SUZ12     | ENSG00000178691.10 | 5.646345862 | 5.251239873 | 5.398993465 |
| PIN1      | ENSG00000127445.13 | 5.693102833 | 6.064255953 | 5.223305968 |
| QDPR      | ENSG00000151552.11 | 6.991833357 | 6.029814785 | 8.874815649 |
| RELA      | ENSG00000173039.18 | 5.709314921 | 5.575791304 | 6.186945755 |
| GET4      | ENSG00000239857.6  | 5.314306668 | 5.802800278 | 5.727332527 |
| VPS39     | ENSG00000166887.15 | 5.914520314 | 6.19697369  | 6.161397719 |
| TSR1      | ENSG00000167721.10 | 7.131887351 | 5.114108702 | 5.415839006 |

|           |                    |             |             |             |
|-----------|--------------------|-------------|-------------|-------------|
| ATP5D     | ENSG00000099624.7  | 6.2730489   | 5.811636709 | 5.402736513 |
| NQO2      | ENSG00000124588.19 | 5.190129521 | 5.954215959 | 5.810151238 |
| EHMT2     | ENSG00000204371.11 | 5.806860123 | 5.803635162 | 5.16563423  |
| CRELD2    | ENSG00000184164.14 | 5.509500642 | 5.876619461 | 5.253898674 |
| PIR       | ENSG00000087842.10 | 6.097258323 | 6.472792356 | 7.263593365 |
| FAM213A   | ENSG00000122378.13 | 5.107573208 | 6.101976272 | 6.757726264 |
| KDM2A     | ENSG00000173120.14 | 6.083671896 | 5.530196567 | 5.79434505  |
| SEC24C    | ENSG00000176986.15 | 5.999947953 | 5.95465402  | 5.815170391 |
| NCBP2-AS2 | ENSG00000270170.1  | 5.361132365 | 5.63044913  | 5.226651557 |
| STAT2     | ENSG00000170581.13 | 5.66063806  | 6.827519795 | 6.973031439 |
| BCL2L13   | ENSG00000099968.17 | 5.40243421  | 6.800578101 | 7.357770411 |
| E2F4      | ENSG00000205250.8  | 6.802553737 | 5.57318204  | 5.83178858  |
| GSK3A     | ENSG00000105723.11 | 6.159552056 | 6.201730641 | 5.720365009 |
| PNO1      | ENSG00000115946.7  | 5.825730745 | 6.22438154  | 5.173806274 |
| HMGB2     | ENSG00000164104.11 | 7.274125886 | 5.104855056 | 5.708076773 |
| RNF114    | ENSG00000124226.10 | 5.322989758 | 5.498453935 | 6.392625345 |
| OSER1     | ENSG00000132823.10 | 6.370643493 | 5.74749195  | 6.412435002 |
| ACAT2     | ENSG00000120437.8  | 5.134877407 | 5.465611302 | 5.321172817 |
| NOP16     | ENSG00000048162.20 | 7.068607589 | 5.831657666 | 5.209465224 |
| KIAA0319L | ENSG00000142687.17 | 5.668760234 | 5.835313547 | 5.581516223 |
| FXR2      | ENSG00000129245.11 | 6.739467351 | 5.182875927 | 5.900417528 |
| DCAF6     | ENSG00000143164.15 | 5.692090713 | 6.556534354 | 5.647075107 |
| CREBL2    | ENSG00000111269.2  | 5.656371701 | 5.675294202 | 8.088387799 |
| NT5C3B    | ENSG00000141698.16 | 5.94237876  | 5.680643471 | 6.473884394 |
| NDUFS1    | ENSG00000023228.13 | 5.176275592 | 5.787098339 | 5.850981356 |
| C8orf33   | ENSG00000182307.12 | 5.894765984 | 5.505468797 | 5.452169777 |
| ATP6V1D   | ENSG00000100554.11 | 5.499345482 | 6.283600222 | 7.038989883 |
| MAN2C1    | ENSG00000140400.16 | 5.958094164 | 6.293486967 | 6.166279393 |
| KCTD15    | ENSG00000153885.14 | 6.031217675 | 5.261329335 | 5.907614187 |
| TCF12     | ENSG00000140262.17 | 6.5391307   | 5.778081111 | 6.333761065 |
| TMBIM4    | ENSG00000155957.17 | 5.598622898 | 5.582500794 | 5.124698517 |
| SETD5     | ENSG00000168137.15 | 6.27518999  | 6.084928148 | 5.635577801 |
| GATAD1    | ENSG00000157259.6  | 5.303724319 | 5.535115199 | 5.286264223 |
| UTP11     | ENSG00000183520.11 | 6.833866132 | 5.984001639 | 5.131061726 |
| RASSF3    | ENSG00000153179.12 | 5.110375707 | 6.629736917 | 7.012994831 |
| FAM207A   | ENSG00000160256.12 | 5.558858126 | 5.333066123 | 7.853899054 |
| FABP5     | ENSG00000164687.10 | 6.54454887  | 7.978066223 | 5.368611233 |
| CTSL      | ENSG00000135047.14 | 8.05266036  | 10.56128209 | 5.340491684 |
| VPS18     | ENSG00000104142.10 | 5.146916315 | 6.19942162  | 5.668023974 |
| DCTPP1    | ENSG00000179958.8  | 6.067167986 | 5.488094974 | 5.233366234 |
| GAK       | ENSG00000178950.16 | 6.21874453  | 5.48578165  | 7.212279339 |
| NOSIP     | ENSG00000142546.13 | 6.80300935  | 5.801953023 | 5.338953734 |
| WNK1      | ENSG00000060237.16 | 5.923737183 | 6.148114502 | 8.039539516 |
| VTI1B     | ENSG00000100568.10 | 5.574711411 | 5.528431513 | 6.273353494 |
| TMX3      | ENSG00000166479.9  | 5.48696722  | 6.476406947 | 5.222203325 |
| CKLF      | ENSG00000217555.12 | 6.402362195 | 5.169976791 | 6.274358767 |

|          |                    |             |             |             |
|----------|--------------------|-------------|-------------|-------------|
| ABCF3    | ENSG00000161204.11 | 5.446357306 | 6.229740271 | 5.819576988 |
| DYNC1LI1 | ENSG00000144635.8  | 6.299565333 | 5.162628448 | 5.933276462 |
| IFI6     | ENSG00000126709.14 | 5.334202444 | 7.621610086 | 6.02365621  |
| TMEM115  | ENSG00000126062.3  | 6.343729197 | 6.123618233 | 5.748932078 |
| JAGN1    | ENSG00000171135.13 | 6.473717186 | 5.905087313 | 5.233092819 |
| STRN4    | ENSG00000090372.14 | 6.635892556 | 5.272456901 | 6.593382859 |
| UFM1     | ENSG00000120686.11 | 5.418098534 | 6.498650287 | 5.900209144 |
| PREB     | ENSG00000138073.13 | 6.200166047 | 6.115151751 | 5.192358832 |
| ZBTB8OS  | ENSG00000176261.15 | 5.580534107 | 5.621977501 | 5.104835214 |
| NAT10    | ENSG00000135372.8  | 6.381329577 | 5.653847772 | 5.540323434 |
| GALNT1   | ENSG00000141429.13 | 5.291383377 | 6.752288447 | 5.846433688 |
| RMDN3    | ENSG00000137824.15 | 5.730178655 | 5.503998374 | 5.126184151 |
| SRCAP    | ENSG00000080603.16 | 6.738119537 | 5.403620436 | 5.445496568 |
| MEPCE    | ENSG00000146834.13 | 6.626101593 | 5.697171966 | 5.111618457 |
| EGLN2    | ENSG00000269858.5  | 5.450392397 | 6.389809325 | 5.77456213  |
| DRG1     | ENSG00000185721.12 | 6.147400757 | 6.792453356 | 6.778187047 |
| ADAM15   | ENSG00000143537.13 | 6.53006763  | 5.962070518 | 5.413566941 |
| OGT      | ENSG00000147162.13 | 6.363188598 | 5.974246714 | 6.25002531  |
| METAP1   | ENSG00000164024.11 | 6.158321331 | 5.077488236 | 5.204346132 |
| SRP19    | ENSG00000153037.13 | 5.976757507 | 5.556997219 | 5.137992812 |
| TRMU     | ENSG00000100416.12 | 5.737217145 | 5.745881917 | 5.853396417 |
| SBNO2    | ENSG00000064932.15 | 6.085343346 | 6.067087671 | 5.215399012 |
| PERP     | ENSG00000112378.11 | 5.760127093 | 6.436224734 | 6.003215838 |
| RRP7A    | ENSG00000189306.10 | 5.255321415 | 5.464678921 | 5.395024914 |
| PI4KA    | ENSG00000241973.10 | 5.295289756 | 5.451181923 | 6.66376747  |
| ATXN7L3  | ENSG00000087152.15 | 6.494676969 | 5.92457683  | 6.227034827 |
| ZNF24    | ENSG00000172466.15 | 5.608319953 | 6.120083947 | 5.997801757 |
| IFRD2    | ENSG00000214706.10 | 7.028513589 | 6.418877187 | 5.163029    |
| GRIPAP1  | ENSG00000068400.13 | 5.681326143 | 5.191499652 | 5.199283821 |
| RBMS1    | ENSG00000153250.19 | 5.17786059  | 6.842213497 | 6.08540258  |
| PIGU     | ENSG00000101464.10 | 5.53156403  | 5.086561583 | 5.876027503 |
| POLR3C   | ENSG00000186141.8  | 6.38884707  | 5.664325742 | 5.46681572  |
| DONSON   | ENSG00000159147.17 | 5.332649092 | 5.337299091 | 5.152005439 |
| YY1AP1   | ENSG00000163374.19 | 6.034473041 | 5.773134084 | 5.134688123 |
| GTF2E2   | ENSG00000197265.8  | 5.537494219 | 5.498651147 | 5.330310895 |
| TSPAN3   | ENSG00000140391.14 | 5.944422818 | 7.062194915 | 7.092855517 |
| MICU2    | ENSG00000165487.13 | 6.167223597 | 5.317915111 | 5.238004295 |
| TSTA3    | ENSG00000104522.15 | 6.114772113 | 5.601528188 | 6.139130453 |
| TARDBP   | ENSG00000120948.16 | 6.299874473 | 6.312014297 | 5.696754874 |
| FAM20B   | ENSG00000116199.11 | 6.370540445 | 5.18416595  | 5.564454224 |
| NSD3     | ENSG00000147548.16 | 5.209594886 | 5.36787247  | 5.512591439 |
| MRPL36   | ENSG00000171421.12 | 5.960117814 | 6.694035741 | 5.332060311 |
| MYO5A    | ENSG00000197535.14 | 5.219276292 | 6.663894566 | 8.534088742 |
| ASL      | ENSG00000126522.16 | 5.272121591 | 6.205733722 | 5.117497384 |
| NDUFS7   | ENSG00000115286.19 | 5.425470336 | 5.217023975 | 6.059711395 |
| HEXIM1   | ENSG00000186834.3  | 6.306635064 | 6.245562994 | 5.403741946 |



|          |                    |             |             |             |
|----------|--------------------|-------------|-------------|-------------|
| KLF6     | ENSG00000067082.14 | 5.136338374 | 5.923724338 | 6.019743852 |
| DOCK7    | ENSG00000116641.17 | 5.431347023 | 6.049592233 | 5.9100904   |
| AGBL5    | ENSG00000084693.15 | 5.403866684 | 5.595296705 | 5.581415176 |
| IGBP1    | ENSG00000089289.15 | 6.192572965 | 6.157069217 | 5.734280413 |
| PCGF2    | ENSG00000277258.4  | 5.811954622 | 5.739834868 | 5.89940904  |
| SCP2     | ENSG00000116171.17 | 5.701311562 | 5.924221514 | 5.480666823 |
| ICAM1    | ENSG00000090339.8  | 5.914900827 | 5.960176383 | 7.250617038 |
| TACC3    | ENSG00000013810.18 | 6.865887697 | 5.230557629 | 6.187322266 |
| IRAK1    | ENSG00000184216.13 | 7.149074974 | 6.097495316 | 5.954224788 |
| BCL7B    | ENSG00000106635.7  | 5.996264872 | 5.975357471 | 5.081672443 |
| MRFAP1L1 | ENSG00000178988.10 | 6.430084335 | 5.151341999 | 7.322360637 |
| ANP32E   | ENSG00000143401.14 | 7.579280098 | 6.323791153 | 5.108957384 |
| COX11    | ENSG00000166260.11 | 5.977410744 | 6.134198966 | 6.251058857 |
| HSPB11   | ENSG00000081870.11 | 6.094073289 | 5.637875117 | 5.087639549 |
| UBP1     | ENSG00000153560.11 | 6.313930201 | 6.176595974 | 5.248929055 |
| PPP1R15B | ENSG00000158615.8  | 6.633807821 | 5.404723786 | 5.188567069 |
| ZNF655   | ENSG00000197343.10 | 5.72046937  | 6.062922977 | 5.748213321 |
| RB1      | ENSG00000139687.13 | 6.500541992 | 6.158457675 | 5.112193028 |
| WDR45B   | ENSG00000141580.15 | 5.431604098 | 6.222161134 | 6.410934408 |
| MRTO4    | ENSG00000053372.4  | 7.008641336 | 6.370192772 | 5.258197416 |
| ARHGAP21 | ENSG00000107863.17 | 5.243816007 | 6.179091133 | 5.730441792 |
| SRPK1    | ENSG00000096063.15 | 5.861617463 | 5.375539763 | 5.689691919 |
| PKN1     | ENSG00000123143.12 | 6.866393411 | 6.818867724 | 6.875475784 |
| ATRX     | ENSG00000085224.21 | 5.613366011 | 5.766493304 | 5.308165117 |
| CPSF4    | ENSG00000160917.14 | 5.424552103 | 6.239255402 | 5.504336248 |
| SLC39A1  | ENSG00000143570.17 | 7.596757564 | 6.403851856 | 5.428422472 |
| RNF220   | ENSG00000187147.17 | 6.036162185 | 5.852257881 | 5.688865222 |
| PDP1     | ENSG00000164951.15 | 6.50560143  | 5.545428308 | 5.715517196 |
| TMUB1    | ENSG00000164897.12 | 5.881748457 | 6.218716419 | 6.231291359 |
| TMX4     | ENSG00000125827.8  | 6.676903625 | 5.101937441 | 5.226426194 |
| PARVA    | ENSG00000197702.11 | 5.073994512 | 5.282729868 | 6.451022531 |
| MADD     | ENSG00000110514.19 | 5.957124309 | 5.22426444  | 6.40430511  |
| CETN2    | ENSG00000147400.8  | 5.339048123 | 5.636113569 | 5.07869788  |
| TBX2     | ENSG00000121068.13 | 5.367511939 | 6.786168124 | 5.260389454 |
| CLK3     | ENSG00000179335.18 | 5.854811037 | 6.089519375 | 5.643567543 |
| DUSP10   | ENSG00000143507.17 | 6.077408729 | 6.387482352 | 5.252856407 |
| CYB5R1   | ENSG00000159348.12 | 5.171987185 | 5.987360769 | 5.662924322 |
| ALG5     | ENSG00000120697.8  | 6.190749552 | 5.433234967 | 5.108262355 |
| HLTF     | ENSG00000071794.15 | 5.077701491 | 5.414787978 | 5.418951668 |
| RRS1     | ENSG00000179041.3  | 7.060931244 | 5.948979798 | 5.189060691 |
| CKS1B    | ENSG00000173207.12 | 7.192759928 | 6.358744163 | 5.192910456 |
| PGLS     | ENSG00000130313.6  | 6.930710811 | 6.570429507 | 6.248662916 |
| GAS2L3   | ENSG00000139354.10 | 5.084410709 | 5.522371007 | 5.752362888 |
| DNAJC21  | ENSG00000168724.14 | 5.581058091 | 5.481500815 | 6.04450068  |
| ANKRD54  | ENSG00000100124.14 | 5.93734068  | 5.776235503 | 5.458190209 |
| SERPINB6 | ENSG00000124570.17 | 6.508927699 | 6.26433455  | 6.83557941  |

|          |                    |             |             |             |
|----------|--------------------|-------------|-------------|-------------|
| LSM1     | ENSG00000175324.9  | 5.36726068  | 5.567424674 | 5.353985454 |
| TAOK2    | ENSG00000149930.17 | 5.103647438 | 5.242312792 | 5.085122963 |
| NUP85    | ENSG00000125450.10 | 5.610443697 | 5.590643033 | 5.143537656 |
| GPAT4    | ENSG00000158669.11 | 5.204501412 | 8.306725917 | 7.233437833 |
| VPS26A   | ENSG00000122958.14 | 5.741629522 | 5.353628085 | 6.276946254 |
| GTF2A2   | ENSG00000140307.10 | 6.497074745 | 6.39452456  | 5.849628117 |
| DDIT4    | ENSG00000168209.4  | 8.287816799 | 7.0248818   | 7.349368438 |
| HBP1     | ENSG00000105856.13 | 5.689491277 | 6.08580206  | 5.375652785 |
| EXOSC4   | ENSG00000178896.8  | 6.920977306 | 6.474009928 | 5.124888594 |
| TOR1AIP2 | ENSG00000169905.12 | 6.836084163 | 5.705127384 | 5.191765064 |
| BTBD2    | ENSG00000133243.8  | 5.866735249 | 7.083764963 | 5.055796639 |
| ZC3HC1   | ENSG00000091732.15 | 5.432824924 | 5.644484892 | 5.103613394 |
| ARHGEF12 | ENSG00000196914.8  | 5.841526652 | 5.032844857 | 6.351959468 |
| MMP17    | ENSG00000198598.6  | 5.077959052 | 6.226825153 | 10.12107761 |
| OTUD5    | ENSG00000068308.13 | 6.146471003 | 5.697883483 | 5.704530412 |
| GAR1     | ENSG00000109534.16 | 6.677389463 | 5.223596217 | 5.107938431 |
| LTA4H    | ENSG00000111144.9  | 6.888213315 | 6.71260859  | 5.150050809 |
| PRRC1    | ENSG00000164244.20 | 5.186349402 | 5.836213071 | 5.263203027 |
| MICU1    | ENSG00000107745.18 | 5.555168747 | 5.093358235 | 5.688433253 |
| PLSCR1   | ENSG00000188313.12 | 5.120152923 | 7.550375792 | 5.420979875 |
| RFC4     | ENSG00000163918.10 | 5.624670356 | 5.402087131 | 5.269738075 |
| FASTKD2  | ENSG00000118246.13 | 5.490453158 | 6.158872385 | 5.066534515 |
| ELMO2    | ENSG00000062598.17 | 5.472081002 | 5.446080564 | 5.29618053  |
| HIP1     | ENSG00000127946.16 | 5.847651999 | 5.832567474 | 5.346553561 |
| MAGT1    | ENSG00000102158.19 | 5.076822914 | 5.568108819 | 5.274839304 |
| UBR5     | ENSG00000104517.12 | 5.94524871  | 5.878419967 | 6.797173728 |
| CAPZA2   | ENSG00000198898.13 | 5.295322244 | 6.310716569 | 5.878775689 |
| NUCB2    | ENSG00000070081.15 | 5.112881231 | 5.629714005 | 5.975863991 |
| C16orf58 | ENSG00000140688.16 | 5.516833323 | 5.698984059 | 5.192485316 |
| MBTPS1   | ENSG00000140943.16 | 6.663172646 | 6.374473549 | 5.942416642 |
| RBM17    | ENSG00000134453.15 | 6.113530299 | 5.74253108  | 5.560646502 |
| UGCG     | ENSG00000148154.9  | 5.466929031 | 7.740783434 | 8.198177561 |
| DAB2     | ENSG00000153071.14 | 5.166197201 | 7.540108194 | 6.149238467 |
| PTPRJ    | ENSG00000149177.12 | 5.74903685  | 6.070392414 | 6.270640091 |
| BROX     | ENSG00000162819.11 | 6.427533881 | 5.059225371 | 5.38470546  |
| RFC5     | ENSG00000111445.13 | 6.119191663 | 5.132495113 | 5.269157141 |
| TXNL4A   | ENSG00000141759.14 | 5.397497797 | 6.486361769 | 5.449472386 |
| IFRD1    | ENSG00000006652.13 | 5.529472817 | 6.569738383 | 6.877766772 |
| IL13RA1  | ENSG00000131724.10 | 5.033855933 | 6.151160657 | 5.240418675 |
| STYXL1   | ENSG00000127952.16 | 5.103247863 | 6.02603454  | 5.943673373 |
| CCDC58   | ENSG00000160124.9  | 6.476939803 | 5.840463045 | 5.220489047 |
| CENPU    | ENSG00000151725.11 | 6.772449253 | 5.099822537 | 5.301733167 |
| ARHGEF11 | ENSG00000132694.18 | 6.035640073 | 6.227984282 | 5.036156992 |
| IMPA1    | ENSG00000133731.9  | 5.794445278 | 5.458808657 | 5.944827965 |
| ABHD2    | ENSG00000140526.17 | 6.143023238 | 5.758542243 | 9.414371594 |
| TMX1     | ENSG00000139921.12 | 5.824538093 | 5.332459406 | 5.323372145 |

|             |                    |             |             |             |
|-------------|--------------------|-------------|-------------|-------------|
| UCHL3       | ENSG00000118939.17 | 5.84342576  | 5.272226596 | 5.173433665 |
| RNF26       | ENSG00000173456.4  | 6.411498085 | 5.068332912 | 5.3095303   |
| COASY       | ENSG00000068120.14 | 7.203335652 | 6.499257768 | 6.528684078 |
| SMC3        | ENSG00000108055.9  | 7.254595789 | 5.428398568 | 5.906805828 |
| SRXN1       | ENSG00000271303.1  | 6.167108984 | 6.163830264 | 5.112044346 |
| SCYL2       | ENSG00000136021.18 | 5.33306721  | 5.358462685 | 5.325077036 |
| AAK1        | ENSG00000115977.18 | 5.626256797 | 6.248189296 | 6.429378763 |
| ECD         | ENSG00000122882.10 | 5.620504111 | 5.302443334 | 5.454271626 |
| RIF1        | ENSG00000080345.17 | 5.329431386 | 5.602319727 | 5.046799233 |
| NSDHL       | ENSG00000147383.10 | 5.218950147 | 6.153982291 | 5.100877112 |
| RINT1       | ENSG00000135249.7  | 5.7117418   | 6.387225397 | 5.071077607 |
| ANKRD11     | ENSG00000167522.14 | 6.407071942 | 6.471731579 | 6.909427111 |
| TNIP1       | ENSG00000145901.14 | 5.848941655 | 5.200371629 | 5.985357139 |
| HDAC3       | ENSG00000171720.9  | 6.144698791 | 5.240575306 | 5.945206071 |
| RAI14       | ENSG00000039560.13 | 5.374017336 | 6.175409951 | 5.024537913 |
| RPS6KB2     | ENSG00000175634.14 | 6.271104742 | 5.105808285 | 5.926898608 |
| COA1        | ENSG00000106603.18 | 6.188257387 | 6.082912409 | 5.685315836 |
| CDK5RAP1    | ENSG00000101391.20 | 5.30760098  | 5.466900708 | 5.047916808 |
| RING1       | ENSG00000204227.4  | 5.502220859 | 5.639676473 | 5.861707567 |
| YTHDC1      | ENSG00000083896.12 | 5.612200393 | 5.381123694 | 5.36707388  |
| GOT1        | ENSG00000120053.10 | 6.273949816 | 5.770937785 | 8.241838827 |
| KPNA4       | ENSG00000186432.8  | 5.286838469 | 5.541777176 | 5.016234141 |
| LITAF       | ENSG00000189067.12 | 5.513170997 | 7.171451374 | 8.39521557  |
| LARP7       | ENSG00000174720.15 | 5.369108511 | 5.081072614 | 5.298881778 |
| MRPS6       | ENSG00000243927.5  | 6.656225042 | 5.169488759 | 7.215915865 |
| TXNDC9      | ENSG00000115514.11 | 5.81358078  | 6.442523958 | 5.066530653 |
| MVP         | ENSG00000013364.18 | 6.218462537 | 5.716294286 | 6.836390085 |
| MPC2        | ENSG00000143158.10 | 5.667501696 | 5.750043777 | 5.621042268 |
| MCCC1       | ENSG00000078070.12 | 5.076832947 | 5.661798538 | 5.081771884 |
| VPS51       | ENSG00000149823.8  | 5.707438495 | 5.335448632 | 6.012632832 |
| ORMDL1      | ENSG00000128699.13 | 5.166525231 | 5.952039652 | 5.699956489 |
| PDCD10      | ENSG00000114209.14 | 5.746731759 | 6.138717384 | 6.323279723 |
| ZNF768      | ENSG00000169957.9  | 5.749312862 | 5.489487559 | 5.974511378 |
| NF1         | ENSG00000196712.17 | 5.635589934 | 5.794516282 | 5.81812573  |
| VIRMA       | ENSG00000164944.11 | 6.277297671 | 5.401247898 | 5.299251319 |
| NCAPH2      | ENSG00000025770.18 | 5.573194285 | 5.678987993 | 6.219903242 |
| MRPL46      | ENSG00000259494.1  | 5.758634007 | 5.430273115 | 5.142378757 |
| ATG13       | ENSG00000175224.16 | 6.383993512 | 6.664400221 | 6.56909607  |
| EIF5        | ENSG00000100664.10 | 5.945399644 | 6.459098375 | 5.457189889 |
| SEL1L       | ENSG00000071537.13 | 5.243584655 | 5.432392508 | 7.347361677 |
| PACS1       | ENSG00000175115.11 | 5.062531493 | 6.158454047 | 5.169754831 |
| MIR4435-2HC | ENSG00000172965.14 | 5.502380856 | 6.439260752 | 5.132315301 |
| B4GAT1      | ENSG00000174684.6  | 5.247097923 | 5.52753714  | 5.712167791 |
| NOTCH2      | ENSG00000134250.19 | 6.543525275 | 5.677628285 | 5.553766089 |
| RTL8C       | ENSG00000134590.13 | 5.334544276 | 7.322757289 | 6.793795046 |
| RNF126      | ENSG00000070423.17 | 5.722100157 | 6.326480026 | 5.131006158 |

|          |                    |             |             |             |
|----------|--------------------|-------------|-------------|-------------|
| CUL3     | ENSG00000036257.12 | 5.831050257 | 5.824765987 | 6.676143862 |
| DHX16    | ENSG00000204560.9  | 6.047195763 | 6.196934201 | 5.601914841 |
| CHPF2    | ENSG00000033100.16 | 5.310463778 | 6.829315454 | 5.243529101 |
| DAXX     | ENSG00000204209.11 | 6.088743632 | 5.622621267 | 5.555989188 |
| IREB2    | ENSG00000136381.12 | 6.235006995 | 5.578207463 | 5.038905826 |
| NUPL2    | ENSG00000136243.16 | 5.499299757 | 6.022796515 | 5.461304967 |
| FAM104A  | ENSG00000133193.12 | 5.180653642 | 5.376143754 | 5.547804762 |
| TMEM184B | ENSG00000198792.12 | 5.172604732 | 6.275519598 | 6.08067458  |
| SNRPA1   | ENSG00000131876.16 | 6.9684732   | 6.38858523  | 5.13020585  |
| EML3     | ENSG00000149499.11 | 5.966344903 | 5.404146673 | 5.97919797  |
| SPNS1    | ENSG00000169682.17 | 5.418776639 | 5.664584711 | 5.218096709 |
| SLC37A3  | ENSG00000157800.17 | 6.071419885 | 6.676015749 | 6.060483648 |
| AAR2     | ENSG00000131043.11 | 6.275400587 | 5.059732323 | 5.720728602 |
| DNAAF5   | ENSG00000164818.15 | 5.67138085  | 5.761609681 | 5.041775066 |
| ANKHD1   | ENSG00000131503.20 | 5.562052048 | 5.282204233 | 5.679430824 |
| GRB2     | ENSG00000177885.13 | 5.123625979 | 5.298318485 | 6.110470467 |
| ISOC2    | ENSG00000063241.7  | 5.561352546 | 5.584769087 | 6.094456639 |
| NUP88    | ENSG00000108559.11 | 6.80627186  | 5.328599246 | 5.125392985 |
| MRPL23   | ENSG00000214026.10 | 6.011592573 | 6.533027889 | 5.148666653 |
| SIGMAR1  | ENSG00000147955.16 | 7.339902714 | 6.347116992 | 5.192845834 |
| INTS14   | ENSG00000138614.14 | 5.890172531 | 5.836994955 | 5.232923246 |
| SGCE     | ENSG00000127990.15 | 5.055151136 | 6.427650192 | 5.54748445  |
| MARCH6   | ENSG00000145495.15 | 6.37729044  | 6.018870804 | 6.258423914 |
| DPF2     | ENSG00000133884.9  | 5.926274652 | 5.387163596 | 5.535479946 |
| EEF1E1   | ENSG00000124802.11 | 5.967498824 | 5.564590446 | 5.525709846 |
| TOP1MT   | ENSG00000184428.12 | 5.69254994  | 5.088391945 | 5.273173894 |
| MRPS25   | ENSG00000131368.7  | 5.69285169  | 6.21978187  | 5.36840028  |
| WAC      | ENSG00000095787.21 | 6.411195172 | 5.329169752 | 6.632127111 |
| MPHOSPH8 | ENSG00000196199.13 | 5.836979162 | 5.563303964 | 5.524153405 |
| KIF2A    | ENSG00000068796.16 | 6.230094118 | 5.086742269 | 5.735796537 |
| UBE2Z    | ENSG00000159202.17 | 5.133347908 | 5.723728095 | 5.624207537 |
| ZNF330   | ENSG00000109445.10 | 5.370411155 | 5.495847432 | 5.289325571 |
| NUDT22   | ENSG00000149761.8  | 5.857422658 | 5.701486682 | 6.282800411 |
| TMPO     | ENSG00000120802.13 | 7.347910474 | 6.175333246 | 5.021477265 |
| GMNN     | ENSG00000112312.9  | 5.994097657 | 5.403736659 | 5.468645677 |
| PSMG3    | ENSG00000157778.8  | 6.413546492 | 6.96382206  | 5.036264817 |
| USP12    | ENSG00000152484.13 | 5.005276707 | 5.061611554 | 5.819438944 |
| ACSL1    | ENSG00000151726.13 | 5.225696199 | 6.55600045  | 8.070212968 |
| SLC25A46 | ENSG00000164209.16 | 5.75456637  | 5.204647932 | 4.992970645 |
| UXS1     | ENSG00000115652.14 | 6.199616555 | 6.078384529 | 6.31901688  |
| MCOLN1   | ENSG00000090674.15 | 5.040196153 | 5.298865851 | 5.188238568 |
| KIFC1    | ENSG00000237649.7  | 6.162483724 | 5.295900407 | 5.020707102 |
| MAP2K3   | ENSG00000034152.18 | 6.643664717 | 5.561798928 | 5.136990415 |
| DHDDS    | ENSG00000117682.16 | 5.290561576 | 6.136865205 | 5.104043294 |
| PYGO2    | ENSG00000163348.3  | 6.261853506 | 5.680289785 | 4.985868545 |
| RAD51C   | ENSG00000108384.14 | 5.082355193 | 5.126843762 | 5.287119344 |

|           |                    |             |             |             |
|-----------|--------------------|-------------|-------------|-------------|
| C5orf51   | ENSG00000205765.8  | 5.509889221 | 6.002163837 | 5.928592886 |
| SMARCB1   | ENSG00000099956.18 | 6.427827629 | 5.826698382 | 6.211472601 |
| UBE4A     | ENSG00000110344.9  | 5.836758426 | 5.268485969 | 5.780159102 |
| GTF2F2    | ENSG00000188342.11 | 5.815516496 | 5.450349582 | 5.028377958 |
| SREBF1    | ENSG00000072310.16 | 7.396805756 | 5.124503931 | 5.064399707 |
| SNRNP25   | ENSG00000161981.10 | 5.827480368 | 5.137006317 | 5.426595942 |
| SEC23B    | ENSG00000101310.14 | 6.441937643 | 6.369084058 | 4.989954876 |
| CTPS1     | ENSG00000171793.13 | 7.061973033 | 5.532454155 | 5.1555103   |
| MCMBP     | ENSG00000197771.12 | 6.670620474 | 5.177295861 | 5.561158562 |
| PPP1R35   | ENSG00000160813.6  | 5.62015279  | 5.899722753 | 5.05194358  |
| RAB35     | ENSG00000111737.11 | 5.818413505 | 5.023044014 | 6.363383818 |
| LCMT1     | ENSG00000205629.11 | 5.684372521 | 5.242783779 | 5.833356044 |
| RANBP3    | ENSG00000031823.14 | 5.882264223 | 5.411369703 | 6.306141022 |
| ZBTB7A    | ENSG00000178951.8  | 5.50627268  | 5.88993048  | 5.601717511 |
| C14orf2   | ENSG00000156411.9  | 6.50223637  | 7.243523869 | 5.059232557 |
| GLMP      | ENSG00000198715.11 | 6.457199891 | 7.528420887 | 5.240361754 |
| GBA2      | ENSG00000070610.14 | 5.815831834 | 5.450714248 | 5.965247932 |
| SEC24A    | ENSG00000113615.12 | 5.632442146 | 5.162531821 | 5.073239012 |
| THEM4     | ENSG00000159445.12 | 6.21867997  | 5.683195475 | 5.403856709 |
| C5orf22   | ENSG00000082213.17 | 5.748768755 | 6.239472171 | 5.702599639 |
| ORAI1     | ENSG00000276045.2  | 5.493623424 | 5.236816253 | 5.032647818 |
| DBN1      | ENSG00000113758.13 | 5.824081313 | 5.879782463 | 6.371820626 |
| TIMM17B   | ENSG00000126768.12 | 6.293790534 | 5.368371166 | 5.668825818 |
| PEPD      | ENSG00000124299.13 | 5.918701884 | 7.53012979  | 5.234418971 |
| RBM14     | ENSG00000239306.4  | 5.948678437 | 5.241827601 | 5.110907662 |
| FBXL5     | ENSG00000118564.14 | 5.695252434 | 5.133757062 | 7.633979143 |
| TSC22D4   | ENSG00000166925.8  | 5.364818198 | 6.522811105 | 6.055287167 |
| NDUFB6    | ENSG00000165264.10 | 6.510786896 | 5.490338842 | 5.089198734 |
| TNFRSF19  | ENSG00000127863.15 | 6.668593114 | 6.91681764  | 5.223100271 |
| KIAA0907  | ENSG00000132680.10 | 6.257329987 | 5.719795347 | 5.17543047  |
| PUM1      | ENSG00000134644.15 | 5.855819218 | 5.461795402 | 5.196774304 |
| WDR34     | ENSG00000119333.11 | 6.981953801 | 6.17314104  | 5.034305906 |
| PTPN18    | ENSG00000072135.12 | 5.074149607 | 5.909023318 | 6.746567076 |
| CCDC14    | ENSG00000175455.14 | 5.308422542 | 5.307900554 | 5.306051986 |
| NCOA6     | ENSG00000198646.13 | 5.242161521 | 5.177373645 | 5.632668141 |
| FAM136A   | ENSG00000035141.7  | 6.352823682 | 6.152738427 | 5.101874649 |
| PYCR1     | ENSG00000183010.16 | 6.042436264 | 6.787932212 | 6.639902068 |
| ASAH1     | ENSG00000104763.18 | 4.999091024 | 7.557618812 | 8.906240088 |
| ABL2      | ENSG00000143322.19 | 5.508894076 | 5.027368489 | 5.699014804 |
| ARMC9     | ENSG00000135931.17 | 5.094196425 | 6.710823725 | 5.387018775 |
| EIF2B4    | ENSG00000115211.15 | 5.940237078 | 5.601698883 | 5.064510882 |
| TRAPPC2L  | ENSG00000167515.10 | 5.231388717 | 5.81164919  | 5.102035754 |
| MAGI2-AS3 | ENSG00000234456.7  | 5.049794756 | 5.884211362 | 5.981531956 |
| YRDC      | ENSG00000196449.3  | 6.341716877 | 5.167431617 | 5.358145212 |
| SLC26A6   | ENSG00000225697.12 | 5.121410049 | 5.631086418 | 4.994830835 |
| LSM4      | ENSG00000130520.10 | 7.987553202 | 6.046663468 | 6.889484205 |

|          |                    |             |             |             |
|----------|--------------------|-------------|-------------|-------------|
| RBL2     | ENSG00000103479.15 | 5.743449502 | 4.973132584 | 6.024288405 |
| UTP14A   | ENSG00000156697.12 | 6.791610906 | 5.262425704 | 5.012075097 |
| TPRKB    | ENSG00000144034.14 | 6.853245098 | 6.111567665 | 4.977302354 |
| BCAR1    | ENSG00000050820.16 | 5.133510261 | 5.458539013 | 5.493086049 |
| FMN1     | ENSG00000248905.8  | 4.969863889 | 8.258599919 | 8.265546932 |
| THUMPD3  | ENSG00000134077.15 | 5.382829672 | 5.265409301 | 5.084651676 |
| NT5DC2   | ENSG00000168268.10 | 6.767931992 | 6.293750054 | 5.008247813 |
| RSRC2    | ENSG00000111011.17 | 5.578884437 | 5.02509737  | 5.990694766 |
| EIF2D    | ENSG00000143486.15 | 6.70209739  | 5.009509402 | 5.860966936 |
| CYB5B    | ENSG00000103018.16 | 5.388609193 | 5.334962178 | 5.881715102 |
| SBDSP1   | ENSG00000225648.5  | 5.314526992 | 6.213151371 | 5.282006085 |
| DESI1    | ENSG00000100418.7  | 5.641518777 | 5.022926324 | 5.115056095 |
| ZDHHC3   | ENSG00000163812.13 | 5.698128655 | 5.735533253 | 5.01426159  |
| MAN2B1   | ENSG00000104774.12 | 6.138831654 | 5.828167064 | 6.60803821  |
| CFAP36   | ENSG00000163001.11 | 5.802981988 | 5.372720551 | 5.894149786 |
| KANK1    | ENSG00000107104.18 | 6.326215614 | 6.096568789 | 8.557461616 |
| DSCR3    | ENSG00000157538.13 | 5.072217782 | 5.714445301 | 6.562888299 |
| ARL8A    | ENSG00000143862.7  | 5.092285949 | 5.782488373 | 5.984918396 |
| SKI      | ENSG00000157933.9  | 6.003800186 | 5.626520583 | 5.258331931 |
| PIGG     | ENSG00000174227.15 | 5.908254344 | 5.032351401 | 6.247187467 |
| VPS16    | ENSG00000215305.9  | 5.761272089 | 5.409049277 | 5.012471658 |
| DPM2     | ENSG00000136908.17 | 6.649818009 | 6.389434699 | 5.494711987 |
| BLOC1S2  | ENSG00000196072.11 | 6.168601077 | 6.528568712 | 5.212227026 |
| COPG2    | ENSG00000158623.14 | 5.536374886 | 5.045777036 | 5.55065565  |
| RNASEH2A | ENSG00000104889.5  | 7.106599795 | 5.150853255 | 5.117189068 |
| PLEKHA5  | ENSG00000052126.14 | 5.058951218 | 7.51696532  | 6.277326877 |
| DBNL     | ENSG00000136279.20 | 6.221268866 | 6.521613641 | 5.906246908 |
| ECT2     | ENSG00000114346.13 | 5.917796058 | 5.408034688 | 5.05735505  |
| RNF6     | ENSG00000127870.16 | 5.507234799 | 5.794236244 | 5.852988224 |
| POLR2H   | ENSG00000163882.9  | 6.511444168 | 6.110060822 | 5.075050557 |
| VPS52    | ENSG00000223501.8  | 5.252900828 | 5.161616593 | 5.138209516 |
| LETM1    | ENSG00000168924.14 | 6.417656666 | 4.95976078  | 6.4726849   |
| GTF3C3   | ENSG00000119041.10 | 5.150675658 | 5.990007441 | 5.749182743 |
| DHPS     | ENSG00000095059.15 | 6.575254681 | 5.275921741 | 5.940319654 |
| COA5     | ENSG00000183513.8  | 5.037790572 | 5.570957685 | 5.40946858  |
| XAB2     | ENSG00000076924.11 | 6.075204439 | 5.605782045 | 5.22751987  |
| CPSF6    | ENSG00000111605.16 | 6.01888226  | 5.50521727  | 5.642318172 |
| RRN3     | ENSG00000085721.12 | 5.966158271 | 5.179794227 | 5.714539116 |
| GGA1     | ENSG00000100083.18 | 5.318130343 | 6.612081176 | 7.626153797 |
| MRGBP    | ENSG00000101189.6  | 5.730195985 | 4.970984777 | 5.291762787 |
| LENG8    | ENSG00000167615.16 | 5.689747196 | 5.592888795 | 5.887788347 |
| NAA60    | ENSG00000122390.17 | 5.891005365 | 5.26702975  | 5.498349188 |
| ATL3     | ENSG00000184743.12 | 5.134418299 | 5.102140041 | 5.198283545 |
| SP100    | ENSG00000067066.16 | 4.976562592 | 5.774972319 | 6.043833955 |
| EPS15    | ENSG00000085832.16 | 5.708334059 | 5.425000705 | 5.466442491 |
| ACTR1B   | ENSG00000115073.7  | 6.023111867 | 5.301528677 | 4.969500431 |

|            |                    |             |             |             |
|------------|--------------------|-------------|-------------|-------------|
| WDR77      | ENSG00000116455.13 | 6.456201618 | 5.92371472  | 5.011431131 |
| MRPL58     | ENSG00000167862.9  | 6.030551064 | 5.281680997 | 5.764710411 |
| SEMA4C     | ENSG00000168758.10 | 5.400625814 | 7.001767322 | 8.568967119 |
| ACBD6      | ENSG00000230124.6  | 5.962732354 | 5.146684719 | 5.306134366 |
| SNX19      | ENSG00000120451.10 | 5.07529148  | 5.140483419 | 5.940522818 |
| PTGR1      | ENSG00000106853.18 | 5.098133143 | 6.736526563 | 5.056637784 |
| RPTOR      | ENSG00000141564.13 | 5.291228324 | 5.508413214 | 5.855737578 |
| PDCD7      | ENSG00000090470.14 | 5.894410323 | 5.641816061 | 5.13869667  |
| DCUN1D5    | ENSG00000137692.11 | 6.618736186 | 5.073800119 | 5.576377871 |
| RTCA       | ENSG00000137996.12 | 5.947854773 | 5.665862698 | 5.565524912 |
| PIK3CB     | ENSG00000051382.8  | 6.023020532 | 6.253346046 | 5.98850326  |
| ARL1       | ENSG00000120805.13 | 5.55448892  | 6.016225749 | 5.051375488 |
| GNPAT      | ENSG00000116906.11 | 6.101544764 | 4.95384154  | 5.608742258 |
| PDXP       | ENSG00000241360.1  | 5.290246272 | 4.962357544 | 5.135562513 |
| METTL26    | ENSG00000130731.15 | 6.473134287 | 5.531835897 | 5.32798208  |
| GNPTAB     | ENSG00000111670.14 | 5.718679636 | 7.113608273 | 7.20888618  |
| SLC29A1    | ENSG00000112759.16 | 5.09768637  | 5.18534041  | 6.594721714 |
| USP34      | ENSG00000115464.14 | 6.274267135 | 5.997184145 | 5.641881037 |
| NDST1      | ENSG00000070614.14 | 6.172878407 | 6.488261592 | 6.898645776 |
| GIT1       | ENSG00000108262.15 | 6.16079088  | 6.565266407 | 6.51294676  |
| DST        | ENSG00000151914.19 | 4.963558558 | 6.190304776 | 5.382082825 |
| CNPPD1     | ENSG00000115649.15 | 5.01750103  | 5.529365912 | 6.112880425 |
| TMEM131    | ENSG00000075568.16 | 4.991596293 | 5.899399847 | 6.346787216 |
| NCDN       | ENSG00000020129.15 | 6.195854133 | 5.856684602 | 4.993255943 |
| SAR1B      | ENSG00000152700.13 | 5.674765631 | 5.742734052 | 5.533397756 |
| TMCO3      | ENSG00000150403.17 | 5.325244488 | 5.308056595 | 5.4466204   |
| AL390728.4 | ENSG00000227671.4  | 5.799783643 | 5.07655925  | 5.536698882 |
| SEC23IP    | ENSG00000107651.12 | 6.437979193 | 5.132989746 | 5.532597593 |
| UBE2G1     | ENSG00000132388.12 | 5.795436446 | 5.002591529 | 5.039014558 |
| PMP22      | ENSG00000109099.13 | 7.831205779 | 6.528353194 | 5.136223499 |
| DYNLT1     | ENSG00000146425.10 | 6.79976121  | 5.24900416  | 5.052464751 |
| SKAP2      | ENSG00000005020.12 | 4.92698858  | 6.009957995 | 6.153454933 |
| HNRNPA0    | ENSG00000177733.6  | 6.250165334 | 5.455842079 | 5.230563598 |
| SNX6       | ENSG00000129515.18 | 5.544391216 | 5.569052102 | 6.357698761 |
| HMOX2      | ENSG00000103415.11 | 6.323053505 | 6.24960354  | 6.410895021 |
| AIDA       | ENSG00000186063.12 | 5.494522488 | 5.035215047 | 5.14276822  |
| FAM208A    | ENSG00000163946.13 | 6.119283528 | 5.66475596  | 4.937839092 |
| AKIRIN1    | ENSG00000174574.15 | 6.078932409 | 5.980734989 | 5.904627812 |
| MED4       | ENSG00000136146.14 | 5.837204032 | 5.365786609 | 4.997585476 |
| TFE3       | ENSG00000068323.16 | 5.735880086 | 5.205795532 | 5.256093638 |
| TBC1D14    | ENSG00000132405.18 | 6.85500819  | 5.993272053 | 9.190285477 |
| MRPS35     | ENSG00000061794.12 | 6.584252573 | 6.322676961 | 5.190126051 |
| GTF3C2     | ENSG00000115207.13 | 6.335688407 | 6.291515855 | 4.979408543 |
| UROS       | ENSG00000188690.12 | 5.914715311 | 5.612536333 | 5.062760005 |
| MAEA       | ENSG00000090316.15 | 5.834495567 | 5.300655986 | 6.222097234 |
| PITHD1     | ENSG00000057757.9  | 5.893492261 | 5.370135186 | 5.097631763 |

|          |                    |             |             |             |
|----------|--------------------|-------------|-------------|-------------|
| TTC17    | ENSG00000052841.14 | 5.956050575 | 5.524392789 | 6.137641396 |
| PLTP     | ENSG00000100979.14 | 6.328664347 | 6.883085092 | 5.217215898 |
| SIRT2    | ENSG00000068903.19 | 4.958321119 | 5.137534919 | 5.905667647 |
| AK3      | ENSG00000147853.16 | 5.190746775 | 5.535200936 | 5.372805119 |
| TMEM209  | ENSG00000146842.16 | 5.39934576  | 5.147006272 | 5.970879871 |
| XPNPEP1  | ENSG00000108039.17 | 6.516512974 | 5.516844402 | 6.969187033 |
| ATG12    | ENSG00000145782.12 | 5.157664789 | 5.530158033 | 6.249624246 |
| POLE4    | ENSG00000115350.11 | 5.236540964 | 5.623822585 | 5.045695535 |
| PPCS     | ENSG00000127125.8  | 5.299590845 | 5.27895191  | 5.847474952 |
| RMDN1    | ENSG00000176623.11 | 5.757226841 | 5.187963032 | 5.170172906 |
| BNIP3L   | ENSG00000104765.15 | 5.042524977 | 5.687390287 | 5.603795648 |
| NAA15    | ENSG00000164134.12 | 6.111966011 | 5.215552543 | 5.176868727 |
| UAP1     | ENSG00000117143.13 | 6.912163765 | 5.654720779 | 5.030282958 |
| HAGH     | ENSG00000063854.12 | 5.09684352  | 5.389999857 | 6.569511288 |
| RALA     | ENSG00000006451.7  | 5.87952234  | 6.240465856 | 5.682209766 |
| PPP1R10  | ENSG00000204569.9  | 6.041109977 | 5.835127428 | 4.955045397 |
| NEK6     | ENSG00000119408.16 | 5.448126156 | 6.185557904 | 5.128508858 |
| CDK5     | ENSG00000164885.12 | 6.017150354 | 6.353651985 | 5.00687378  |
| NABP2    | ENSG00000139579.12 | 7.107438772 | 6.065806116 | 5.854354345 |
| MED10    | ENSG00000133398.3  | 6.231387165 | 6.435760061 | 4.99661973  |
| RNF20    | ENSG00000155827.11 | 6.441711744 | 6.257490278 | 4.942914652 |
| SMAP2    | ENSG00000084070.11 | 6.159254247 | 5.057859512 | 5.493118264 |
| SASH1    | ENSG00000111961.17 | 5.117708124 | 4.932317773 | 6.348260914 |
| MBTPS2   | ENSG00000012174.11 | 5.490487798 | 4.903580644 | 5.449647373 |
| CUEDC2   | ENSG00000107874.10 | 5.799294681 | 4.975305716 | 5.38230175  |
| NT5C3A   | ENSG00000122643.18 | 5.16053033  | 5.694730846 | 7.450347754 |
| AASDHPPT | ENSG00000149313.10 | 6.24343611  | 5.447242443 | 6.014119808 |
| SLC52A2  | ENSG00000185803.8  | 6.190583825 | 5.951384086 | 5.247961704 |
| UTP6     | ENSG00000108651.9  | 6.52631352  | 5.996788487 | 5.554124778 |
| MRPL53   | ENSG00000204822.6  | 6.467779347 | 5.830767869 | 4.986142932 |
| GPATCH11 | ENSG00000152133.14 | 4.932972858 | 5.299921401 | 5.193559515 |
| RBM26    | ENSG00000139746.15 | 6.127190461 | 5.220327125 | 4.949540359 |
| MTFR1    | ENSG00000066855.15 | 5.83292514  | 5.335472139 | 5.41247623  |
| CWC15    | ENSG00000150316.11 | 5.757287427 | 5.028862462 | 6.371824369 |
| CLASRP   | ENSG00000104859.14 | 5.855441608 | 5.137197739 | 5.755757797 |
| MKI67    | ENSG00000148773.13 | 7.060001502 | 5.064356999 | 5.144118724 |
| MAFG     | ENSG00000197063.10 | 5.272632367 | 5.787481684 | 6.659999952 |
| ADAM10   | ENSG00000137845.14 | 5.790306156 | 6.467009496 | 6.173908635 |
| ZMYND19  | ENSG00000165724.5  | 6.11320358  | 6.144547947 | 4.958942047 |
| SCFD1    | ENSG00000092108.20 | 5.549661571 | 5.644591346 | 5.47472125  |
| FYN      | ENSG00000010810.17 | 5.367530791 | 6.629722335 | 5.734283779 |
| BLVRB    | ENSG00000090013.9  | 4.940944869 | 6.574312961 | 6.27835859  |
| FAM114A1 | ENSG00000197712.11 | 4.956305981 | 5.162041498 | 7.875803806 |
| CIAPIN1  | ENSG00000005194.14 | 6.217866487 | 4.911764394 | 4.957034366 |
| CLTB     | ENSG00000175416.12 | 6.026888531 | 5.117678395 | 5.539128623 |
| ZDHHC16  | ENSG00000171307.18 | 6.386473246 | 5.354221006 | 4.9758319   |



|         |                    |             |             |             |
|---------|--------------------|-------------|-------------|-------------|
| PPIE    | ENSG00000084072.16 | 6.514183081 | 5.364926169 | 4.977982919 |
| OSTM1   | ENSG00000081087.14 | 4.899683604 | 6.830772898 | 6.684767454 |
| SREK1   | ENSG00000153914.15 | 5.941935207 | 5.095143726 | 5.599746824 |
| RNF149  | ENSG00000163162.8  | 4.902600844 | 6.158215922 | 5.343445598 |
| MED13   | ENSG00000108510.9  | 5.275069857 | 5.309674138 | 5.55226211  |
| SUN2    | ENSG00000100242.15 | 5.582027449 | 5.346670187 | 5.768872715 |
| JKAMP   | ENSG00000050130.17 | 5.009381346 | 5.315095749 | 5.258070023 |
| WDR5    | ENSG00000196363.9  | 6.286888817 | 6.107167469 | 5.105760418 |
| EZH2    | ENSG00000106462.10 | 5.953939307 | 4.932650374 | 5.219107275 |
| KCTD5   | ENSG00000167977.8  | 5.853933802 | 5.529422831 | 5.379195628 |
| GPLOW   | ENSG00000068394.10 | 5.465278194 | 5.346835061 | 5.107093283 |
| NUBP2   | ENSG00000095906.16 | 6.632694278 | 5.784513786 | 6.068505337 |
| PIP5K1C | ENSG00000186111.9  | 5.21639819  | 5.832571958 | 4.907178056 |
| KMT5A   | ENSG00000183955.12 | 6.605341289 | 5.122794505 | 6.281191143 |
| MYO1B   | ENSG00000128641.18 | 4.960727597 | 5.840474033 | 5.062591239 |
| INSIG1  | ENSG00000186480.12 | 4.95430866  | 5.448652368 | 5.405770983 |
| TANC1   | ENSG00000115183.14 | 4.913273131 | 6.118798694 | 6.459804865 |
| WDR11   | ENSG00000120008.15 | 5.608803328 | 5.367553241 | 5.765876898 |
| RGL2    | ENSG00000237441.9  | 4.956001108 | 5.033037061 | 6.365646226 |
| KAT2A   | ENSG00000108773.10 | 5.696276205 | 6.260382208 | 5.729703579 |
| CNOT2   | ENSG00000111596.11 | 5.867437293 | 5.075729794 | 5.62949146  |
| NDEL1   | ENSG00000166579.15 | 5.3477752   | 5.199475128 | 5.690425757 |
| GRB10   | ENSG00000106070.17 | 5.187797435 | 6.86885546  | 7.116041201 |
| LPXN    | ENSG00000110031.12 | 5.771808519 | 6.194838835 | 8.089983977 |
| ERBIN   | ENSG00000112851.14 | 5.309718534 | 5.347598613 | 6.224346962 |
| C9orf16 | ENSG00000171159.4  | 6.404022155 | 6.475833062 | 5.627917312 |
| EHMT1   | ENSG00000181090.20 | 5.827949497 | 5.893382613 | 5.319619218 |
| SPCS2   | ENSG00000118363.11 | 5.678833634 | 5.591773103 | 5.407308988 |
| TSR2    | ENSG00000158526.7  | 5.127933125 | 6.264781555 | 5.513526175 |
| GPR107  | ENSG00000148358.19 | 5.297022049 | 6.687726178 | 4.91458704  |
| GNL1    | ENSG00000204590.12 | 4.988342768 | 5.095300785 | 5.520171316 |
| HOMER3  | ENSG00000051128.18 | 5.806090408 | 5.802389814 | 5.417059282 |
| PPP2R5C | ENSG00000078304.19 | 6.203194433 | 6.310070172 | 4.902679609 |
| TMEM141 | ENSG00000244187.7  | 6.094638359 | 6.213949986 | 6.980103294 |
| ITGB5   | ENSG00000082781.11 | 7.445861635 | 6.605623393 | 5.067996354 |
| DDX55   | ENSG00000111364.15 | 6.009841996 | 5.380815164 | 4.954614708 |
| SPRY4   | ENSG00000187678.8  | 7.843399856 | 5.301880898 | 9.147919933 |
| EHBP1   | ENSG00000115504.14 | 6.389327132 | 5.767932339 | 6.291823857 |
| LPIN1   | ENSG00000134324.11 | 4.921588812 | 6.159840757 | 5.441386864 |
| TAF11   | ENSG00000064995.16 | 5.506174145 | 4.957311728 | 5.017984714 |
| TRIM26  | ENSG00000234127.8  | 4.895842989 | 4.994857731 | 5.587927967 |
| LEF1    | ENSG00000138795.9  | 6.02429094  | 5.764047572 | 6.406603454 |
| POLR2M  | ENSG00000255529.7  | 5.055704108 | 5.394377609 | 5.692145829 |
| STARD3  | ENSG00000131748.15 | 5.526312448 | 5.483661527 | 5.930609837 |
| VPS28   | ENSG00000160948.13 | 5.344130881 | 5.667951696 | 5.911744168 |
| THAP5   | ENSG00000177683.13 | 5.297135095 | 5.033209323 | 4.920464214 |

|           |                    |             |             |             |
|-----------|--------------------|-------------|-------------|-------------|
| EXOSC1    | ENSG00000171311.12 | 6.406230777 | 5.428468378 | 5.494229174 |
| TMEM101   | ENSG00000091947.9  | 5.422102335 | 6.149185873 | 5.62707212  |
| PRIM1     | ENSG00000198056.13 | 6.277097681 | 5.008215467 | 4.994933661 |
| RABAC1    | ENSG00000105404.10 | 5.435684161 | 7.987640259 | 5.102445913 |
| CCDC85B   | ENSG00000175602.3  | 7.080071688 | 5.784439734 | 5.01163496  |
| PDCL3     | ENSG00000115539.13 | 5.384715751 | 5.956080576 | 4.926000208 |
| PTDSS2    | ENSG00000174915.11 | 5.102566659 | 6.221373395 | 5.507530473 |
| PPM1F     | ENSG00000100034.13 | 5.494391196 | 5.460077538 | 5.222708307 |
| E2F1      | ENSG00000101412.12 | 5.854119585 | 4.889675178 | 5.851927882 |
| SUPT7L    | ENSG00000119760.15 | 4.992223967 | 5.420098725 | 5.030656625 |
| TMEM138   | ENSG00000149483.11 | 5.952737064 | 5.860687659 | 5.905885646 |
| TOB1      | ENSG00000141232.4  | 5.390498469 | 6.523857899 | 5.991022617 |
| MTIF3     | ENSG00000122033.14 | 4.993001859 | 5.270092247 | 5.499935311 |
| EXOC5     | ENSG00000070367.15 | 5.253469339 | 5.120947055 | 5.240575324 |
| ALDH7A1   | ENSG00000164904.17 | 5.987125115 | 5.027700688 | 5.751065936 |
| SSSCA1    | ENSG00000173465.7  | 6.653823317 | 5.421302669 | 5.469400985 |
| RETREG3   | ENSG00000141699.10 | 5.34752519  | 5.845915945 | 6.269641235 |
| ASH2L     | ENSG00000129691.15 | 6.003448743 | 4.920306296 | 5.164582837 |
| SWAP70    | ENSG00000133789.14 | 4.967312881 | 5.986947267 | 5.99717955  |
| PWP1      | ENSG00000136045.11 | 6.590985914 | 7.18363634  | 5.072977832 |
| SHARPIN   | ENSG00000179526.16 | 5.174975469 | 5.135034482 | 5.145128505 |
| STX10     | ENSG00000104915.14 | 6.07983375  | 5.44514205  | 5.21456546  |
| SH2B3     | ENSG00000111252.10 | 7.968009242 | 7.557172145 | 7.285487524 |
| NISCH     | ENSG00000010322.15 | 5.062738583 | 5.755817153 | 4.908584996 |
| UPF3A     | ENSG00000169062.14 | 5.767138424 | 4.962970059 | 5.177330821 |
| KMT2E     | ENSG00000005483.20 | 5.010175206 | 5.596792995 | 5.956794021 |
| NBN       | ENSG00000104320.13 | 5.900290259 | 5.069790844 | 4.970944115 |
| MEN1      | ENSG00000133895.14 | 6.313566745 | 5.700566951 | 5.141042039 |
| POLR3GL   | ENSG00000121851.12 | 5.027534031 | 5.57917294  | 5.177954823 |
| PAFAH1B3  | ENSG00000079462.7  | 5.305934685 | 5.25087292  | 5.027564144 |
| SURF1     | ENSG00000148290.9  | 5.865999669 | 6.906582128 | 5.506963588 |
| PHF20     | ENSG00000025293.16 | 5.403571392 | 4.931714154 | 5.664589529 |
| FBXO9     | ENSG00000112146.16 | 5.07689637  | 5.279247959 | 5.531343923 |
| RBBP8     | ENSG00000101773.18 | 5.367913777 | 5.568070512 | 4.957530885 |
| MTMR14    | ENSG00000163719.19 | 6.061322087 | 5.877404616 | 5.611980022 |
| ACTR10    | ENSG00000131966.13 | 5.153289123 | 5.611799054 | 5.864144214 |
| UBE2A     | ENSG00000077721.15 | 5.455691197 | 5.562349669 | 5.228643099 |
| JUNB      | ENSG00000171223.5  | 7.082452931 | 5.965855383 | 5.693619501 |
| FAM122B   | ENSG00000156504.16 | 5.30860955  | 5.316899034 | 5.465440447 |
| SLC39A3   | ENSG00000141873.10 | 4.841186929 | 5.558853073 | 5.05823158  |
| PLEKHM2   | ENSG00000116786.11 | 5.672112773 | 6.68337052  | 5.822826599 |
| GOLGA4    | ENSG00000144674.16 | 5.608839233 | 6.132514262 | 5.599170152 |
| SLC1A4    | ENSG00000115902.10 | 6.065405665 | 6.622957743 | 6.808353642 |
| NSMCE1    | ENSG00000169189.16 | 5.51454253  | 5.202743579 | 5.440911542 |
| SECISBP2L | ENSG00000138593.8  | 4.877446184 | 5.60931982  | 5.976156976 |
| TROVE2    | ENSG00000116747.12 | 5.587101525 | 4.859263935 | 5.100232813 |

|           |                    |             |             |             |
|-----------|--------------------|-------------|-------------|-------------|
| NIN       | ENSG00000100503.23 | 4.854209016 | 5.492344818 | 5.896009201 |
| ZMYM4     | ENSG00000146463.11 | 5.406425024 | 5.112254511 | 5.573869844 |
| ENTPD4    | ENSG00000197217.12 | 4.872380731 | 5.475587056 | 5.647777305 |
| HECTD3    | ENSG00000126107.14 | 5.186316703 | 5.608482314 | 5.083062098 |
| AP3M1     | ENSG00000185009.12 | 5.081301801 | 5.490817626 | 5.924035894 |
| ACTR1A    | ENSG00000138107.12 | 6.965494474 | 5.386219686 | 6.599930865 |
| PI4KB     | ENSG00000143393.16 | 5.998615774 | 5.661091222 | 5.243804066 |
| RLIM      | ENSG00000131263.12 | 5.196109253 | 5.673474265 | 5.179432472 |
| ULK3      | ENSG00000140474.12 | 5.493425842 | 5.868460249 | 5.790276494 |
| PPM1B     | ENSG00000138032.20 | 4.883857696 | 5.483757526 | 5.270244543 |
| WTAP      | ENSG00000146457.14 | 6.356041091 | 5.419385863 | 5.205494402 |
| ZBTB4     | ENSG00000174282.11 | 4.946677864 | 4.922748249 | 5.70112908  |
| LACTB2    | ENSG00000147592.8  | 5.328594511 | 5.14169234  | 4.95641852  |
| RPRD2     | ENSG00000163125.15 | 6.099484106 | 5.413716397 | 4.904364865 |
| DUSP12    | ENSG00000081721.11 | 6.227795465 | 5.326954859 | 5.300575553 |
| CNOT3     | ENSG00000088038.17 | 5.985982438 | 5.032445624 | 5.631286872 |
| NAGLU     | ENSG00000108784.9  | 5.050734843 | 6.291494684 | 5.027415254 |
| DECR1     | ENSG00000104325.6  | 5.023894831 | 5.76261378  | 6.006305938 |
| UBE2T     | ENSG00000077152.9  | 7.325489806 | 5.605586659 | 4.868967988 |
| SEC63     | ENSG00000025796.13 | 5.487691849 | 5.848777283 | 5.359795506 |
| GFM2      | ENSG00000164347.17 | 6.396818862 | 5.547845508 | 5.80196653  |
| GNA12     | ENSG00000146535.13 | 5.226329949 | 6.043185849 | 5.262823905 |
| TRIM4     | ENSG00000146833.15 | 5.179187751 | 5.768185386 | 4.986484439 |
| LTBP3     | ENSG00000168056.15 | 7.766134082 | 5.286177054 | 6.944360279 |
| FBRSL1    | ENSG00000112787.12 | 5.601556918 | 6.23442369  | 4.98163902  |
| RACGAP1   | ENSG00000161800.12 | 6.808630973 | 5.671862814 | 4.882089116 |
| TMEM219   | ENSG00000149932.16 | 5.146375965 | 5.966612019 | 5.799859713 |
| TEX10     | ENSG00000136891.13 | 5.924976078 | 5.964531381 | 4.879067566 |
| C3orf14   | ENSG00000114405.10 | 5.425664053 | 5.293137117 | 4.913347021 |
| BOD1L1    | ENSG00000038219.12 | 6.344651347 | 5.033612312 | 6.739564415 |
| PAK1      | ENSG00000149269.9  | 5.567047408 | 5.591500695 | 5.386453612 |
| BCS1L     | ENSG00000074582.12 | 4.895647244 | 5.377721913 | 5.232604494 |
| PBXIP1    | ENSG00000163346.16 | 5.284983669 | 6.091311707 | 5.348869255 |
| TAP1      | ENSG00000168394.10 | 5.025334379 | 5.490588876 | 4.856000675 |
| DPAGT1    | ENSG00000172269.18 | 6.271144385 | 5.287495416 | 5.78103346  |
| IL6ST     | ENSG00000134352.19 | 6.263280202 | 4.869295134 | 5.543699152 |
| KDM3B     | ENSG00000120733.13 | 5.550496212 | 4.938308464 | 5.3771089   |
| EP400     | ENSG00000183495.13 | 5.882368469 | 5.531564767 | 7.250366098 |
| ARFIP2    | ENSG00000132254.12 | 5.538459413 | 6.556235396 | 4.8779643   |
| PRPF3     | ENSG00000117360.12 | 6.332182601 | 6.222783801 | 4.902859048 |
| ABHD17C   | ENSG00000136379.11 | 7.12411913  | 6.511411183 | 5.916220921 |
| PPP5C     | ENSG00000011485.14 | 6.412458751 | 4.952171099 | 5.366165765 |
| RASA3     | ENSG00000185989.10 | 6.016748864 | 4.922272869 | 6.160434527 |
| KCTD9     | ENSG00000104756.15 | 5.280096776 | 4.884642276 | 5.117536721 |
| LINC00511 | ENSG00000227036.6  | 6.711325598 | 5.854074825 | 6.467068543 |
| CRK       | ENSG00000167193.7  | 5.997975778 | 4.877942939 | 5.051983615 |

|             |                    |             |             |             |
|-------------|--------------------|-------------|-------------|-------------|
| LETMD1      | ENSG00000050426.15 | 6.152127125 | 5.388770185 | 5.866859438 |
| RFXANK      | ENSG00000064490.13 | 6.388701218 | 5.799584648 | 5.083244217 |
| CDK7        | ENSG00000134058.11 | 6.488773678 | 5.253209022 | 5.351478748 |
| NFYC        | ENSG00000066136.20 | 5.620595991 | 5.043621135 | 4.98033794  |
| ATM         | ENSG00000149311.18 | 5.037879619 | 6.21918694  | 6.81744817  |
| SPAG7       | ENSG00000091640.7  | 6.382312384 | 4.940413225 | 5.898789689 |
| TM9SF1      | ENSG00000100926.14 | 5.501246197 | 5.261253087 | 5.060181254 |
| DHX40       | ENSG00000108406.9  | 5.868204812 | 6.378601121 | 5.861959572 |
| NR1D2       | ENSG00000174738.12 | 5.8361802   | 5.011540661 | 4.934985001 |
| KMT2C       | ENSG00000055609.17 | 5.228330244 | 5.569567997 | 5.117411685 |
| SUGP2       | ENSG00000064607.16 | 5.718169981 | 5.805664408 | 5.203080409 |
| SGSM3       | ENSG00000100359.20 | 4.899072435 | 6.208897248 | 6.292216301 |
| PHF20L1     | ENSG00000129292.20 | 5.241943913 | 4.839342112 | 5.563843454 |
| UCHL5       | ENSG00000116750.13 | 6.924097759 | 5.716124025 | 4.867114562 |
| UNC119B     | ENSG00000175970.10 | 5.402364693 | 4.837788634 | 5.957371479 |
| RAB11A      | ENSG00000103769.9  | 5.792656177 | 5.463048601 | 5.439558504 |
| S100B       | ENSG00000160307.9  | 6.695170164 | 8.476282712 | 8.265717495 |
| BRD9        | ENSG00000028310.17 | 5.350362009 | 5.662107116 | 5.315458837 |
| SELENOT     | ENSG00000198843.12 | 5.642569422 | 6.036314823 | 5.374292759 |
| UBE2J2      | ENSG00000160087.20 | 6.116513574 | 5.874119349 | 5.66518771  |
| TBC1D23     | ENSG00000036054.12 | 5.12493859  | 4.979799372 | 4.998403914 |
| PIGC        | ENSG00000135845.9  | 5.65508868  | 4.934609848 | 5.376703221 |
| GLE1        | ENSG00000119392.14 | 6.288916901 | 6.157706902 | 4.89838462  |
| PHAX        | ENSG00000164902.13 | 5.479081705 | 4.910863939 | 4.959185932 |
| CFAP97      | ENSG00000164323.12 | 6.332049591 | 5.5161799   | 6.275846886 |
| TMEM63B     | ENSG00000137216.18 | 5.225621733 | 6.462101489 | 6.024920699 |
| PCIF1       | ENSG00000100982.11 | 5.304473465 | 4.914403623 | 5.161964839 |
| WDFY1       | ENSG00000085449.14 | 5.123972756 | 7.542365929 | 8.009293808 |
| ARFGAP3     | ENSG00000242247.10 | 4.881297643 | 5.794962844 | 6.92764032  |
| UBE2R2      | ENSG00000107341.4  | 6.175977401 | 5.358413057 | 5.167065178 |
| PIM3        | ENSG00000198355.4  | 6.32186087  | 6.794815537 | 6.821138382 |
| RBM6        | ENSG00000004534.14 | 5.873643784 | 5.6439636   | 5.659965673 |
| FNDC3B      | ENSG00000075420.12 | 5.215814062 | 6.041662757 | 4.921155031 |
| AP3B1       | ENSG00000132842.13 | 5.352812411 | 5.100606072 | 5.137686804 |
| TRMT2A      | ENSG00000099899.14 | 5.376356525 | 5.701194067 | 5.69131043  |
| CRBN        | ENSG00000113851.14 | 5.776491861 | 5.345643645 | 5.170929255 |
| METTL23     | ENSG00000181038.13 | 5.35529153  | 5.886650579 | 5.560191164 |
| SDC4        | ENSG00000124145.6  | 6.967254342 | 4.863047234 | 5.924798065 |
| CBFB        | ENSG00000067955.13 | 6.401878486 | 4.987276439 | 6.40988162  |
| DANCR       | ENSG00000226950.6  | 5.994716471 | 5.432013309 | 6.004090832 |
| PBK         | ENSG00000168078.9  | 6.628952918 | 5.552994497 | 4.864231322 |
| UQCC1       | ENSG00000101019.21 | 5.298176896 | 5.326590486 | 4.936627866 |
| ANKHD1-EIF4 | ENSG00000254996.5  | 5.083791341 | 4.907718368 | 5.246813782 |
| FTSJ1       | ENSG00000068438.14 | 6.119153949 | 5.325654211 | 4.940414988 |
| PDHX        | ENSG00000110435.11 | 5.900330732 | 5.111745404 | 5.615795331 |
| NEDD4L      | ENSG00000049759.17 | 5.780160021 | 7.785824373 | 7.399854828 |

|          |                    |             |             |             |
|----------|--------------------|-------------|-------------|-------------|
| NAA38    | ENSG00000183011.13 | 6.279227065 | 5.075307606 | 4.918977979 |
| SLC2A4RG | ENSG00000125520.13 | 5.306761378 | 5.276302912 | 5.73861818  |
| BABAM2   | ENSG00000158019.20 | 5.712445354 | 5.145175549 | 5.839051142 |
| FOXRED1  | ENSG00000110074.10 | 5.910195373 | 4.848491166 | 4.918650639 |
| PCBD1    | ENSG00000166228.8  | 5.352968287 | 5.258277859 | 5.910879781 |
| UBE2F    | ENSG00000184182.18 | 5.121582593 | 6.168435085 | 5.196803557 |
| LASP1    | ENSG00000002834.17 | 5.898472844 | 6.367604491 | 4.998306102 |
| TRIM44   | ENSG00000166326.6  | 5.738657738 | 5.086015442 | 5.566207671 |
| ENDOD1   | ENSG00000149218.4  | 5.163612192 | 4.859294857 | 6.179836185 |
| SNX8     | ENSG00000106266.10 | 5.948896707 | 6.005571857 | 5.425669234 |
| STK40    | ENSG00000196182.10 | 5.850530627 | 5.98463037  | 5.610508474 |
| ZNF706   | ENSG00000120963.11 | 5.798408196 | 5.695163866 | 5.72056599  |
| NIT2     | ENSG00000114021.11 | 5.371038556 | 5.147893731 | 5.783587943 |
| PELP1    | ENSG00000141456.14 | 5.795910565 | 4.983046697 | 4.814876127 |
| FAM98A   | ENSG00000119812.18 | 5.966381076 | 6.365421545 | 5.027798925 |
| TTC3     | ENSG00000182670.13 | 5.088167445 | 5.675433775 | 7.375410331 |
| ZNFX1    | ENSG00000124201.14 | 5.357840356 | 5.34855729  | 5.315638401 |
| TNRC18   | ENSG00000182095.14 | 6.040816621 | 5.905114021 | 5.645583671 |
| REEP4    | ENSG00000168476.11 | 5.739333038 | 5.677276767 | 4.905050938 |
| TP53RK   | ENSG00000172315.5  | 5.211653566 | 5.391398499 | 6.019659692 |
| PAGR1    | ENSG00000280789.1  | 6.181691417 | 5.036164167 | 4.814472864 |
| GID8     | ENSG00000101193.7  | 5.986843706 | 4.80358691  | 5.376099128 |
| USP8     | ENSG00000138592.13 | 5.834479061 | 6.193978834 | 5.999002395 |
| AKAP9    | ENSG00000127914.16 | 5.435175324 | 6.000690552 | 5.304751989 |
| HERC2    | ENSG00000128731.15 | 5.323374353 | 5.410641086 | 4.89802736  |
| PPIP5K2  | ENSG00000145725.19 | 5.259288407 | 5.030519269 | 5.780307229 |
| ICMT     | ENSG00000116237.15 | 6.112965085 | 6.116397846 | 5.105794593 |
| NCAPD3   | ENSG00000151503.12 | 6.71483096  | 4.841833139 | 4.821537858 |
| COX16    | ENSG00000133983.14 | 5.627480538 | 5.230200806 | 5.062305151 |
| CEP95    | ENSG00000258890.6  | 5.219330626 | 5.461694376 | 5.573237812 |
| MLST8    | ENSG00000167965.17 | 5.674001288 | 5.077080321 | 5.397743422 |
| STX4     | ENSG00000103496.14 | 5.804949935 | 5.818260596 | 5.47231973  |
| DESI2    | ENSG00000121644.18 | 6.23746735  | 4.812649271 | 5.764606387 |
| KIF1B    | ENSG00000054523.17 | 5.407775412 | 5.626892448 | 5.901967839 |
| CHST11   | ENSG00000171310.10 | 4.979136613 | 6.028564975 | 8.368223022 |
| RAB5A    | ENSG00000144566.10 | 6.300690965 | 6.251639283 | 5.795686552 |
| LRP10    | ENSG00000197324.8  | 4.834666701 | 5.639156377 | 6.061552395 |
| PSEN2    | ENSG00000143801.16 | 4.837709988 | 5.590633347 | 6.183850362 |
| SNRNP40  | ENSG00000060688.12 | 6.464332734 | 6.003439124 | 4.994907644 |
| MARCKS   | ENSG00000277443.2  | 5.343498088 | 6.508461195 | 6.180426464 |
| FEM1B    | ENSG00000169018.5  | 5.333771497 | 5.345840945 | 5.742934417 |
| CNIH1    | ENSG00000100528.11 | 5.306012068 | 5.223277728 | 5.710889928 |
| GBF1     | ENSG00000107862.4  | 5.848078331 | 5.21712523  | 5.326577546 |
| DPP3     | ENSG00000254986.7  | 5.821555961 | 5.237794436 | 5.85230697  |
| TSEN34   | ENSG00000170892.10 | 5.711371837 | 5.087505902 | 5.930820692 |
| CERK     | ENSG00000100422.13 | 4.838406025 | 6.358788394 | 6.035960234 |

|          |                    |             |             |             |
|----------|--------------------|-------------|-------------|-------------|
| TBC1D16  | ENSG00000167291.15 | 5.946190558 | 8.621311957 | 7.651213093 |
| NCAPH    | ENSG00000121152.9  | 6.447128754 | 5.306111871 | 4.893609998 |
| MFSD10   | ENSG00000109736.14 | 5.8266807   | 5.418166011 | 6.558789539 |
| GALNT2   | ENSG00000143641.9  | 8.363222542 | 7.62729311  | 4.809834314 |
| LRPAP1   | ENSG00000163956.10 | 5.140906834 | 5.333579783 | 7.244209638 |
| TNRC6A   | ENSG00000090905.18 | 5.963257969 | 5.517377    | 5.209552461 |
| TMED5    | ENSG00000117500.12 | 5.153440072 | 5.421430446 | 4.813514127 |
| ZDHHC6   | ENSG00000023041.11 | 5.507465542 | 5.361107794 | 5.235386341 |
| PPT1     | ENSG00000131238.17 | 6.751067529 | 6.635057535 | 4.852455239 |
| TUSC2    | ENSG00000114383.9  | 5.599347641 | 5.553332783 | 5.064840255 |
| NOP14    | ENSG00000087269.15 | 6.994061429 | 4.827693718 | 6.458468932 |
| NSMAF    | ENSG00000035681.7  | 5.684694565 | 5.736485158 | 5.832592376 |
| MFSD5    | ENSG00000182544.8  | 5.028136878 | 5.441089101 | 5.510060906 |
| TERF1    | ENSG00000147601.13 | 5.414539889 | 5.465634537 | 5.392954656 |
| MIA3     | ENSG00000154305.16 | 5.598151292 | 5.22108614  | 5.004685115 |
| SUPT20H  | ENSG00000102710.19 | 5.744454722 | 5.365444967 | 4.836156128 |
| NDUFA10  | ENSG00000130414.11 | 4.783492334 | 5.599689705 | 5.649310743 |
| NUP155   | ENSG00000113569.15 | 6.148368379 | 5.609289583 | 4.818216677 |
| BIN3     | ENSG00000147439.12 | 6.393650275 | 6.357898855 | 5.787767277 |
| CHCHD5   | ENSG00000125611.15 | 4.886857146 | 5.267856005 | 5.114993593 |
| ELF1     | ENSG00000120690.15 | 5.390896552 | 5.164878162 | 6.549196507 |
| GPR108   | ENSG00000125734.15 | 6.029526658 | 6.003910361 | 5.701613519 |
| SLC25A13 | ENSG00000004864.13 | 6.129724572 | 6.858160875 | 4.885204423 |
| CLK1     | ENSG0000013441.15  | 4.828360935 | 4.962159795 | 5.667365478 |
| ACACA    | ENSG00000278540.4  | 5.71236771  | 5.407687216 | 5.723665363 |
| POLG     | ENSG00000140521.12 | 5.023908848 | 5.650017922 | 5.73392828  |
| PAXBP1   | ENSG00000159086.14 | 5.48229374  | 5.4192337   | 5.80098762  |
| XBP1     | ENSG00000100219.16 | 6.848243254 | 7.101707671 | 7.919264468 |
| GRK6     | ENSG00000198055.10 | 5.286840774 | 4.938865891 | 7.088973179 |
| METTL2B  | ENSG00000165055.15 | 5.43110915  | 5.649156094 | 5.188651095 |
| PPAT     | ENSG00000128059.8  | 5.613503918 | 4.959091443 | 5.003643652 |
| TRIO     | ENSG00000038382.18 | 5.291718282 | 7.214470488 | 6.53494944  |
| TWISTNB  | ENSG00000105849.5  | 5.31296058  | 6.142620117 | 5.033932308 |
| ABCB8    | ENSG00000197150.12 | 4.928655103 | 5.200101212 | 5.216789166 |
| CTCF     | ENSG00000102974.14 | 6.087251008 | 4.837800425 | 5.096102827 |
| KLF9     | ENSG00000119138.4  | 7.145017679 | 5.872724183 | 4.853119832 |
| NR2F6    | ENSG00000160113.5  | 6.80409303  | 6.03143187  | 5.703976302 |
| CREB3L2  | ENSG00000182158.14 | 5.906145316 | 6.227185497 | 6.483004091 |
| TBC1D10B | ENSG00000169221.13 | 5.808406855 | 5.226494144 | 5.44049391  |
| FADD     | ENSG00000168040.4  | 5.983858575 | 5.88952543  | 4.847514155 |
| MRPS33   | ENSG00000090263.15 | 5.042085377 | 5.595925867 | 5.402438487 |
| HTT      | ENSG00000197386.10 | 4.97888705  | 4.805317173 | 6.703646281 |
| DARS2    | ENSG00000117593.9  | 6.92528395  | 5.048872401 | 4.799441493 |
| TACO1    | ENSG00000136463.7  | 5.658415671 | 5.562853836 | 5.955904105 |
| NADSYN1  | ENSG00000172890.11 | 4.986307593 | 5.991204824 | 5.640902333 |
| TWF1     | ENSG00000151239.13 | 6.987932881 | 7.089954084 | 4.816830686 |

|            |                    |             |             |             |
|------------|--------------------|-------------|-------------|-------------|
| CAPN15     | ENSG00000103326.11 | 5.901041742 | 5.162849949 | 5.092847289 |
| PSEN1      | ENSG00000080815.18 | 4.915426192 | 5.545511503 | 5.616100429 |
| AC020915.1 | ENSG00000142396.10 | 6.458693774 | 5.328283368 | 5.150104953 |
| UBA5       | ENSG00000081307.12 | 5.349509348 | 5.205580644 | 5.081783476 |
| TIMM21     | ENSG00000075336.11 | 5.171520169 | 6.009026735 | 4.860700224 |
| SPTSSA     | ENSG00000165389.6  | 5.379175653 | 4.822807269 | 4.844992456 |
| PLK1       | ENSG00000166851.14 | 6.987787166 | 5.458374345 | 4.848428545 |
| CAND1      | ENSG00000111530.12 | 6.144695032 | 5.183577768 | 4.817036857 |
| ZFAND3     | ENSG00000156639.11 | 5.19501034  | 6.180199773 | 7.041163311 |
| MTMR2      | ENSG00000087053.18 | 6.341659194 | 4.947816022 | 5.78696103  |
| GTF3C5     | ENSG00000148308.17 | 6.76720129  | 6.906406893 | 4.955690459 |
| SLC35B4    | ENSG00000205060.10 | 4.819717953 | 5.94736032  | 5.9374065   |
| ATAD2      | ENSG00000156802.12 | 6.085281851 | 5.164029413 | 4.793779207 |
| OSBPL1A    | ENSG00000141447.17 | 4.898586695 | 6.375725426 | 6.277828289 |
| CD58       | ENSG00000116815.15 | 6.104591568 | 5.81185192  | 5.034115841 |
| STAM       | ENSG00000136738.14 | 4.887498326 | 5.12433652  | 5.383093772 |
| MRPS27     | ENSG00000113048.16 | 6.120689205 | 5.091536691 | 5.864653928 |
| DSN1       | ENSG00000149636.15 | 5.999514564 | 4.937899718 | 4.810319624 |
| PIP5K1A    | ENSG00000143398.19 | 6.4393834   | 6.281059679 | 4.944933172 |
| HPCAL1     | ENSG00000115756.12 | 8.048390631 | 6.265126949 | 8.261742847 |
| BTG3       | ENSG00000154640.14 | 4.86504817  | 6.587831757 | 6.471977531 |
| ORC5       | ENSG00000164815.10 | 5.762330647 | 6.391028912 | 4.795117949 |
| RBM8A      | ENSG00000265241.6  | 6.936987615 | 5.983313694 | 4.871332789 |
| PFKFB4     | ENSG00000114268.11 | 6.784288752 | 5.787587417 | 5.004614501 |
| UBE2B      | ENSG00000119048.7  | 5.484222624 | 5.492713281 | 4.983006238 |
| CENPK      | ENSG00000123219.12 | 5.43463258  | 5.311392083 | 4.89043181  |
| TRPM7      | ENSG00000092439.13 | 5.27711643  | 5.497610844 | 5.680906017 |
| ZNF598     | ENSG00000167962.13 | 6.064370575 | 5.568203845 | 4.933622488 |
| RNF144A    | ENSG00000151692.14 | 5.163309499 | 5.849135467 | 5.558115963 |
| SNAPC2     | ENSG00000104976.11 | 5.374121885 | 5.433245203 | 5.168409071 |
| FOXJ3      | ENSG00000198815.8  | 5.964910983 | 5.073468077 | 4.778037272 |
| ZFP36L1    | ENSG00000185650.9  | 6.512632396 | 5.428514071 | 7.578911961 |
| NXF1       | ENSG00000162231.13 | 6.210955527 | 4.779341992 | 5.413484136 |
| METTL2A    | ENSG00000087995.15 | 5.524351585 | 5.40763436  | 5.427027688 |
| MRPL54     | ENSG00000183617.4  | 6.624844473 | 4.770725884 | 5.223311276 |
| CLCN3      | ENSG00000109572.13 | 4.839140182 | 5.553694575 | 7.115869965 |
| KIAA0368   | ENSG00000136813.14 | 6.537462329 | 5.977651565 | 5.403545282 |
| MLLT1      | ENSG00000130382.8  | 6.700000521 | 5.495891237 | 6.778561558 |
| TMEM120A   | ENSG00000189077.10 | 4.834016802 | 6.171349999 | 6.018833099 |
| ARPC5L     | ENSG00000136950.13 | 6.662705208 | 6.854798387 | 4.791195285 |
| CHD1       | ENSG00000153922.10 | 6.071865211 | 6.160625352 | 5.55672468  |
| TFB2M      | ENSG00000162851.7  | 7.027883733 | 4.774664409 | 4.844369958 |
| ARHGEF7    | ENSG00000102606.17 | 5.998268695 | 5.281896248 | 5.354092245 |
| CCDC50     | ENSG00000152492.13 | 4.81201547  | 5.179720529 | 5.33129559  |
| SLC4A1AP   | ENSG00000163798.13 | 5.206031213 | 5.17748309  | 4.890841657 |
| RALGAPB    | ENSG00000170471.14 | 5.206759287 | 4.851377553 | 5.82750059  |

|           |                    |             |             |             |
|-----------|--------------------|-------------|-------------|-------------|
| CBR3      | ENSG00000159231.5  | 4.831254478 | 5.469367947 | 4.884072141 |
| APOO      | ENSG00000184831.13 | 5.635546822 | 4.915761192 | 6.073258592 |
| EDC4      | ENSG00000038358.14 | 5.614427395 | 4.770598211 | 5.400865097 |
| CEP55     | ENSG00000138180.15 | 6.501327331 | 4.948136261 | 4.853254871 |
| ALKBH3    | ENSG00000166199.12 | 5.371423617 | 5.302817557 | 5.877911661 |
| PCYOX1    | ENSG00000116005.11 | 5.036605072 | 5.926740594 | 4.769370323 |
| PCNX3     | ENSG00000197136.4  | 5.805301725 | 5.62762677  | 4.76515243  |
| ADCY3     | ENSG00000138031.14 | 5.998097737 | 5.932037275 | 5.43309974  |
| WWP1      | ENSG00000123124.13 | 5.035146608 | 5.629906242 | 6.260417529 |
| AMOTL1    | ENSG00000166025.17 | 7.098358126 | 5.274957883 | 5.600546801 |
| ABCC2     | ENSG00000023839.10 | 4.770318545 | 5.212698435 | 5.752203579 |
| DNPEP     | ENSG00000123992.18 | 4.883731297 | 5.773007589 | 5.992793283 |
| POLR1B    | ENSG00000125630.15 | 6.165454486 | 5.318460959 | 4.950400168 |
| BET1L     | ENSG00000177951.17 | 5.331821156 | 6.180656376 | 5.694400292 |
| CRTC2     | ENSG00000160741.16 | 6.319707549 | 5.95889265  | 4.768051678 |
| AP1G1     | ENSG00000166747.12 | 6.095164242 | 6.006238266 | 6.088527937 |
| OAZ2      | ENSG00000180304.14 | 5.305796332 | 5.78504126  | 5.457340172 |
| KANK2     | ENSG00000197256.10 | 5.973142224 | 4.903687121 | 4.941451122 |
| RFWD3     | ENSG00000168411.13 | 6.408772851 | 5.801295999 | 5.306537823 |
| TM2D1     | ENSG00000162604.12 | 4.904367821 | 5.65326287  | 5.014991482 |
| CENPN     | ENSG00000166451.13 | 6.197137916 | 5.414093978 | 5.283697813 |
| DUS3L     | ENSG00000141994.15 | 5.895145882 | 5.215509642 | 4.9271435   |
| CARS2     | ENSG00000134905.16 | 6.489589578 | 5.391570784 | 4.85374611  |
| DUSP6     | ENSG00000139318.7  | 6.596972492 | 5.626948377 | 6.383352207 |
| TRIAP1    | ENSG00000170855.3  | 5.984455483 | 5.793542869 | 6.881972945 |
| PPP1R12A  | ENSG00000058272.16 | 5.569232919 | 4.953055332 | 5.556992654 |
| MRFAP1    | ENSG00000179010.14 | 6.800935062 | 6.411631922 | 7.488118117 |
| CHMP1B    | ENSG00000255112.2  | 5.754539242 | 7.867692659 | 5.027824465 |
| PRKRA     | ENSG00000180228.12 | 4.978819874 | 5.248965518 | 5.494671819 |
| ARHGAP17  | ENSG00000140750.16 | 5.763121473 | 5.239998433 | 4.841010936 |
| ORC6      | ENSG00000091651.8  | 5.756223634 | 5.209696382 | 4.778296222 |
| PPAN      | ENSG00000130810.19 | 6.431738392 | 5.500809582 | 5.200446607 |
| SH3BGRL   | ENSG00000131171.12 | 4.855397026 | 6.657445687 | 6.393552807 |
| HSDL2     | ENSG00000119471.14 | 6.295959831 | 5.860236821 | 4.734323904 |
| PRRC2B    | ENSG00000130723.18 | 5.833372555 | 6.15925776  | 4.879349139 |
| RNF145    | ENSG00000145860.11 | 6.975803315 | 5.250640247 | 5.040445395 |
| SPEN      | ENSG00000065526.10 | 5.550438089 | 5.43353569  | 4.860715391 |
| SLC35F5   | ENSG00000115084.13 | 4.739143601 | 5.845964543 | 5.683819715 |
| SRC       | ENSG00000197122.11 | 5.801378555 | 4.783448035 | 6.575538003 |
| C14orf166 | ENSG00000087302.8  | 6.173742518 | 6.09298106  | 5.93550177  |
| FAM189B   | ENSG00000160767.20 | 6.348840593 | 5.606773178 | 4.848001575 |
| TTLL12    | ENSG00000100304.12 | 6.242380708 | 6.277808945 | 4.786028688 |
| EIF2AK2   | ENSG00000055332.16 | 5.490577753 | 5.259764542 | 4.73746623  |
| NOL12     | ENSG00000273899.4  | 5.64574307  | 5.206776052 | 4.900920163 |
| IPO8      | ENSG00000133704.9  | 6.357972533 | 5.339534292 | 4.745517525 |
| MEMO1     | ENSG00000162959.13 | 5.720931993 | 4.932887525 | 4.819659533 |



|          |                    |             |             |             |
|----------|--------------------|-------------|-------------|-------------|
| SNU13    | ENSG00000100138.13 | 6.948975841 | 6.619907369 | 6.018019304 |
| UBL3     | ENSG00000122042.9  | 4.781150584 | 6.715984657 | 7.575124364 |
| FAM89A   | ENSG00000182118.7  | 5.413315118 | 4.877336928 | 5.852072944 |
| RAD17    | ENSG00000152942.18 | 4.981419614 | 4.775035384 | 5.558477448 |
| HSPBP1   | ENSG00000133265.10 | 6.982820103 | 5.046667473 | 5.814140295 |
| POLE3    | ENSG00000148229.12 | 6.867096421 | 6.785352917 | 4.813972898 |
| RPP30    | ENSG00000148688.13 | 5.882688476 | 5.168629736 | 4.798423479 |
| LAS1L    | ENSG00000001497.16 | 6.612416945 | 5.827833996 | 5.035169192 |
| ZNHIT6   | ENSG00000117174.10 | 5.194033129 | 5.111010627 | 4.76749162  |
| MZT1     | ENSG00000204899.5  | 6.150069989 | 4.752843787 | 5.708670614 |
| RBBP4    | ENSG00000162521.18 | 5.840499235 | 4.874981612 | 5.309974884 |
| NFIX     | ENSG00000008441.16 | 6.823024981 | 5.183881794 | 5.029989712 |
| WDR75    | ENSG00000115368.9  | 5.736678964 | 5.666004692 | 4.943637696 |
| PRKACA   | ENSG00000072062.13 | 6.271142306 | 5.819571317 | 4.811449987 |
| CDKN1A   | ENSG00000124762.13 | 6.747884459 | 7.737803578 | 9.50979875  |
| CYTH2    | ENSG00000105443.14 | 5.100639384 | 4.906711185 | 4.834484142 |
| FAM89B   | ENSG00000176973.7  | 6.066870686 | 4.823485655 | 5.423484769 |
| CFAP20   | ENSG00000070761.7  | 5.649245605 | 4.787532476 | 5.627108163 |
| CCNB1IP1 | ENSG00000100814.17 | 4.964920055 | 5.058235596 | 5.371294174 |
| POLR1C   | ENSG00000171453.17 | 5.435188554 | 4.872550273 | 4.900982218 |
| MTRR     | ENSG00000124275.14 | 5.625409166 | 5.964973148 | 5.573678314 |
| FLYWCH1  | ENSG00000059122.16 | 5.05134407  | 5.464820371 | 5.760527877 |
| KNTC1    | ENSG00000184445.11 | 5.604036797 | 4.714181803 | 5.682570699 |
| BCKDK    | ENSG00000103507.13 | 6.182511481 | 5.23938935  | 5.048525173 |
| MFN1     | ENSG00000171109.18 | 5.098685887 | 5.702279539 | 5.958869686 |
| RBM34    | ENSG00000188739.14 | 6.117398124 | 4.851234533 | 5.760723703 |
| DHX38    | ENSG00000140829.11 | 6.346104546 | 5.65049971  | 5.647093421 |
| NEPRO    | ENSG00000163608.14 | 5.213773752 | 5.665240217 | 5.181132274 |
| RBM15B   | ENSG00000259956.1  | 5.86485376  | 5.36968207  | 4.77073106  |
| PINK1    | ENSG00000158828.7  | 5.251249269 | 5.446899508 | 5.608802427 |
| KAT8     | ENSG00000103510.19 | 5.709054903 | 4.819956861 | 5.420377882 |
| NCKAP5L  | ENSG00000167566.16 | 5.494817318 | 6.070131486 | 5.279340212 |
| UBE2J1   | ENSG00000198833.6  | 5.226536871 | 5.607031381 | 6.362088383 |
| RFC1     | ENSG00000035928.15 | 5.999529909 | 4.716926704 | 6.567264574 |
| DVL1     | ENSG00000107404.19 | 5.382033007 | 5.37422815  | 5.621981983 |
| METTL3   | ENSG00000165819.11 | 5.919786447 | 4.879956896 | 4.795591158 |
| NUBP1    | ENSG00000103274.10 | 6.405118497 | 4.867281459 | 4.989086459 |
| PNPLA8   | ENSG00000135241.16 | 4.813721467 | 4.965838572 | 4.912241451 |
| QRICH1   | ENSG00000198218.10 | 5.741116333 | 5.581733801 | 4.716508955 |
| EAPP     | ENSG00000129518.8  | 5.806733916 | 4.816361325 | 5.379694873 |
| SPOP     | ENSG00000121067.17 | 5.597368302 | 4.937207999 | 4.965992708 |
| CAMSAP2  | ENSG00000118200.14 | 5.786925593 | 4.805421253 | 5.020114395 |
| TPRA1    | ENSG00000163870.14 | 5.279164755 | 5.710845039 | 4.744136185 |
| SMYD5    | ENSG00000135632.11 | 5.329808462 | 5.055760491 | 4.799543244 |
| FAM208B  | ENSG00000108021.19 | 6.450042993 | 5.693648566 | 5.929292273 |
| CLPB     | ENSG00000162129.12 | 5.431019984 | 4.786140823 | 4.915835971 |

|          |                    |             |             |             |
|----------|--------------------|-------------|-------------|-------------|
| PPWD1    | ENSG00000113593.11 | 5.602577296 | 4.837744477 | 5.340760261 |
| MT-TQ    | ENSG00000210107.1  | 5.530766849 | 6.16873202  | 4.898809662 |
| MSH2     | ENSG00000095002.13 | 6.575961663 | 5.801131375 | 4.709062489 |
| POLR2I   | ENSG00000105258.8  | 5.785069236 | 5.313211838 | 5.113814761 |
| PRPS2    | ENSG00000101911.12 | 5.832936583 | 5.31953553  | 4.851960449 |
| BAK1     | ENSG00000030110.12 | 5.448022411 | 5.339969138 | 5.10412791  |
| CENPF    | ENSG00000117724.12 | 7.184915332 | 5.442376936 | 4.787437397 |
| FHOD1    | ENSG00000135723.13 | 6.133392021 | 5.179798689 | 5.015840913 |
| EML2     | ENSG00000125746.16 | 5.659090625 | 6.026954253 | 5.861640584 |
| HNRNPLL  | ENSG00000143889.15 | 5.543426004 | 5.606491655 | 5.579515325 |
| PTPN23   | ENSG00000076201.14 | 5.328297359 | 5.604090735 | 4.721466305 |
| CC2D1A   | ENSG00000132024.17 | 5.849119382 | 6.248782656 | 6.422017191 |
| MLXIP    | ENSG00000175727.13 | 4.793623616 | 5.758086672 | 5.406954395 |
| USF1     | ENSG00000158773.14 | 6.494893443 | 5.919905782 | 4.917444777 |
| SLC26A2  | ENSG00000155850.7  | 8.826189241 | 6.694074496 | 4.71674093  |
| SLMAP    | ENSG00000163681.14 | 5.911120884 | 5.057993313 | 5.151885418 |
| CD276    | ENSG00000103855.17 | 6.868364088 | 8.49841841  | 5.378397924 |
| BRD7     | ENSG00000166164.15 | 6.152190148 | 4.734708118 | 5.736788764 |
| EIF4EBP2 | ENSG00000148730.6  | 5.555696259 | 5.178236523 | 4.737332962 |
| FAM118B  | ENSG00000197798.8  | 4.827396657 | 4.755604359 | 4.889634218 |
| WIPF1    | ENSG00000115935.17 | 6.619416182 | 5.312320177 | 8.099960246 |
| SH2B1    | ENSG00000178188.14 | 5.19232732  | 5.3695686   | 5.321247976 |
| CDK11B   | ENSG00000248333.8  | 5.220992155 | 5.20161545  | 4.937508933 |
| POLRMT   | ENSG00000099821.13 | 5.730668409 | 6.33288977  | 5.429848212 |
| KIAA0930 | ENSG00000100364.18 | 5.090982993 | 6.516335444 | 5.124834575 |
| PRMT7    | ENSG00000132600.16 | 5.366237165 | 4.878964912 | 6.26563746  |
| DMAC2    | ENSG00000105341.18 | 5.56336808  | 5.636597967 | 5.001380987 |
| SP110    | ENSG00000135899.17 | 4.704830545 | 5.420811945 | 5.089174407 |
| PHLDB1   | ENSG00000019144.18 | 6.122819255 | 4.98102996  | 6.864721398 |
| PRDX1    | ENSG00000117450.13 | 9.844125228 | 9.322525948 | 9.08456417  |
| GM2A     | ENSG00000196743.8  | 4.716644734 | 6.897875516 | 7.474404659 |
| IDS      | ENSG00000010404.17 | 6.054407136 | 6.649969866 | 6.534915074 |
| TPRG1L   | ENSG00000158109.14 | 5.172203877 | 6.359119857 | 6.132241981 |
| GSTM4    | ENSG00000168765.16 | 4.907923968 | 5.316505959 | 5.068435306 |
| TRRAP    | ENSG00000196367.12 | 5.050084772 | 5.618981539 | 4.710507899 |
| NCKAP1   | ENSG00000061676.14 | 4.696979009 | 5.538363706 | 5.553937836 |
| CDCA5    | ENSG00000146670.9  | 6.487287968 | 5.191160243 | 4.742956108 |
| ESRRA    | ENSG00000173153.13 | 5.452818249 | 5.338105753 | 5.969263473 |
| CREB3    | ENSG00000107175.11 | 5.76285302  | 5.078237629 | 4.838893629 |
| SIN3B    | ENSG00000127511.9  | 5.755304576 | 7.402183696 | 5.252394303 |
| TULP3    | ENSG00000078246.16 | 5.249215793 | 4.69611602  | 6.227450367 |
| PANK3    | ENSG00000120137.6  | 5.639392617 | 4.704601018 | 5.848732727 |
| IP6K1    | ENSG00000176095.11 | 5.665453365 | 5.684550236 | 4.685235563 |
| SMC1A    | ENSG00000072501.17 | 6.876896889 | 5.109843637 | 5.429893784 |
| PRCP     | ENSG00000137509.10 | 4.716322553 | 4.732508937 | 5.127627026 |
| CHP1     | ENSG00000187446.11 | 6.786751405 | 6.589938507 | 7.614311815 |

|           |                    |             |             |             |
|-----------|--------------------|-------------|-------------|-------------|
| TRIM27    | ENSG00000204713.10 | 5.242466627 | 5.120896651 | 5.266518906 |
| MTMR4     | ENSG00000108389.9  | 5.234532564 | 5.727742069 | 5.78071436  |
| QSOX1     | ENSG00000116260.16 | 5.814430143 | 5.855127362 | 5.610700902 |
| NIF3L1    | ENSG00000196290.14 | 5.064483702 | 5.241425791 | 4.742297041 |
| ASPSCR1   | ENSG00000169696.15 | 4.878285822 | 5.109506172 | 5.6124734   |
| KANSL3    | ENSG00000114982.17 | 4.883315459 | 4.737020574 | 5.793281834 |
| STX2      | ENSG00000111450.13 | 4.756872881 | 5.126183611 | 6.239108054 |
| CDK17     | ENSG00000059758.7  | 4.796602034 | 5.111317129 | 6.125176684 |
| AMDHD2    | ENSG00000162066.14 | 4.678151568 | 6.083503686 | 5.932301898 |
| SDHC      | ENSG00000143252.14 | 5.596069499 | 5.522649729 | 4.782078836 |
| PKP4      | ENSG00000144283.21 | 5.145416625 | 5.163885779 | 6.080496306 |
| TMEM54    | ENSG00000121900.18 | 4.756541129 | 5.212057365 | 5.431108692 |
| STXBP3    | ENSG00000116266.10 | 5.60280482  | 5.452294864 | 4.705738414 |
| FANCL     | ENSG00000115392.11 | 5.730565788 | 4.821619711 | 5.093180087 |
| MGAT2     | ENSG00000168282.5  | 5.47870829  | 4.689710916 | 5.00256207  |
| CCDC34    | ENSG00000109881.16 | 4.911198885 | 4.755968536 | 5.176406901 |
| HMGXB4    | ENSG00000100281.13 | 5.353411549 | 5.328727929 | 5.231269145 |
| KRIT1     | ENSG00000001631.15 | 4.867480172 | 5.299987723 | 4.792546806 |
| C1orf122  | ENSG00000197982.13 | 6.253926654 | 5.316820737 | 4.926566949 |
| FOXRED2   | ENSG00000100350.14 | 5.143110701 | 5.189006004 | 5.648110307 |
| RBMX2     | ENSG00000134597.15 | 5.769803582 | 5.677051164 | 5.146883672 |
| KIF2C     | ENSG00000142945.12 | 6.632168811 | 4.794823516 | 4.858976545 |
| G6PC3     | ENSG00000141349.8  | 6.861380784 | 6.636318833 | 5.915350848 |
| MAPK1IP1L | ENSG00000168175.14 | 5.49403936  | 5.489770788 | 5.938539686 |
| PIP4K2A   | ENSG00000150867.13 | 4.755489144 | 5.738182855 | 6.246770682 |
| EIF1AD    | ENSG00000175376.8  | 5.39889687  | 4.920934883 | 5.097232287 |
| CEP63     | ENSG00000182923.16 | 4.783808549 | 5.170171858 | 4.875782621 |
| METTL17   | ENSG00000165792.17 | 6.238073022 | 4.690279755 | 4.979237848 |
| ATP11B    | ENSG00000058063.15 | 5.310452567 | 5.296055316 | 5.475006086 |
| C1orf216  | ENSG00000142686.7  | 4.704199331 | 4.912267723 | 5.719791324 |
| RAB29     | ENSG00000117280.12 | 5.676380894 | 4.763522488 | 4.904780536 |
| ZMYM2     | ENSG00000121741.16 | 5.635046032 | 5.303826745 | 5.046838276 |
| KDM4A     | ENSG00000066135.12 | 5.567052407 | 5.053727232 | 5.543215115 |
| AKT1      | ENSG00000142208.15 | 5.938391144 | 6.60626204  | 4.895489164 |
| ELP2      | ENSG00000134759.13 | 5.332537358 | 6.167313184 | 4.995970893 |
| NDUFB1    | ENSG00000183648.9  | 6.329010376 | 6.814022701 | 4.954865508 |
| NEU1      | ENSG00000204386.10 | 4.993025453 | 6.108586548 | 5.49166896  |
| SYAP1     | ENSG00000169895.5  | 5.717873525 | 4.69826826  | 5.117003793 |
| PPP2R5E   | ENSG00000154001.13 | 5.162583174 | 4.731824768 | 4.952473752 |
| ENY2      | ENSG00000120533.12 | 5.962737952 | 5.000387445 | 4.857004873 |
| ITM2B     | ENSG00000136156.12 | 5.383551233 | 5.506223702 | 5.526916374 |
| MMS19     | ENSG00000155229.20 | 6.184427214 | 5.531590815 | 6.174913735 |
| TCFL5     | ENSG00000101190.12 | 4.934833031 | 5.265433721 | 5.748799483 |
| GPN1      | ENSG00000198522.13 | 5.595874163 | 5.7846319   | 4.751305266 |
| NCS1      | ENSG00000107130.9  | 5.490678626 | 7.369949704 | 4.760044904 |
| SHKBP1    | ENSG00000160410.14 | 5.972493322 | 6.735371949 | 6.249735682 |

|          |                    |             |             |             |
|----------|--------------------|-------------|-------------|-------------|
| SNX14    | ENSG00000135317.12 | 5.604015238 | 5.062556308 | 5.499940861 |
| CLN6     | ENSG00000128973.12 | 5.624058914 | 5.456267793 | 4.784150309 |
| ACY1     | ENSG00000243989.8  | 6.263094536 | 6.098447369 | 4.739559956 |
| IFT57    | ENSG00000114446.4  | 5.69798884  | 4.74650893  | 5.024444828 |
| HMG20A   | ENSG00000140382.14 | 5.179308591 | 5.269524384 | 5.487224331 |
| LTV1     | ENSG00000135521.8  | 6.155025094 | 5.218798144 | 4.703513623 |
| SBNO1    | ENSG00000139697.13 | 5.412187874 | 5.00771324  | 5.607746909 |
| ITSN2    | ENSG00000198399.14 | 5.383418449 | 5.865639411 | 5.89570333  |
| NAT9     | ENSG00000109065.11 | 5.16214042  | 6.176500402 | 5.783043274 |
| ZFP36L2  | ENSG00000152518.7  | 6.85057134  | 6.32304855  | 4.732165292 |
| RNF216   | ENSG00000011275.18 | 5.225951753 | 5.985698343 | 6.106943179 |
| KIAA0141 | ENSG00000081791.8  | 5.945693275 | 4.727132116 | 5.667261569 |
| NIT1     | ENSG00000158793.13 | 5.690742526 | 6.035703076 | 5.339319437 |
| ALG1     | ENSG00000033011.11 | 5.219195736 | 5.29633753  | 4.764123953 |
| CCDC82   | ENSG00000149231.11 | 5.229817614 | 4.720053335 | 5.634378615 |
| SART3    | ENSG00000075856.11 | 6.482623629 | 5.797718076 | 4.751814068 |
| SCAF11   | ENSG00000139218.17 | 6.005408259 | 4.839347742 | 6.059483519 |
| TRIP13   | ENSG00000071539.13 | 6.436723896 | 5.861185183 | 4.69174949  |
| DLG1     | ENSG00000075711.20 | 4.769016502 | 5.828377214 | 5.878305826 |
| DHRS7    | ENSG00000100612.13 | 4.695896308 | 5.60089716  | 6.160607391 |
| RFWD2    | ENSG00000143207.19 | 5.631088939 | 4.833235768 | 4.837660025 |
| CYTOR    | ENSG00000222041.10 | 5.239079601 | 5.565855935 | 4.685043907 |
| PHYH     | ENSG00000107537.13 | 4.983512358 | 4.718539686 | 5.537173301 |
| BRAF     | ENSG00000157764.12 | 4.691225217 | 5.024400147 | 5.40914262  |
| ABCC1    | ENSG00000103222.18 | 4.940565909 | 5.763716405 | 4.718136236 |
| VPS11    | ENSG00000160695.14 | 4.955524571 | 4.946344369 | 5.691132029 |
| STK24    | ENSG00000102572.14 | 6.640093565 | 4.999775479 | 7.305000474 |
| NDUFV3   | ENSG00000160194.17 | 5.311234994 | 5.107783748 | 4.666606126 |
| NRBF2    | ENSG00000148572.15 | 4.666751085 | 5.862741324 | 5.218180422 |
| UNK      | ENSG00000132478.9  | 5.26829685  | 5.668964438 | 6.355782253 |
| CHRAC1   | ENSG00000104472.9  | 5.89102544  | 5.132609598 | 4.713020774 |
| RWDD1    | ENSG00000111832.12 | 5.138713759 | 4.924194753 | 5.060926091 |
| UBE2V2   | ENSG00000169139.11 | 6.188993881 | 4.853825278 | 5.047340083 |
| SFT2D1   | ENSG00000198818.9  | 5.990313837 | 4.972108386 | 4.867996911 |
| DDR1     | ENSG00000204580.13 | 5.211496577 | 5.685784943 | 6.312722142 |
| NAB1     | ENSG00000138386.16 | 4.91062332  | 5.144293985 | 5.280901144 |
| METTL5   | ENSG00000138382.14 | 4.841853808 | 6.046196496 | 6.31570156  |
| ARMC10   | ENSG00000170632.13 | 5.152186641 | 5.658077351 | 5.004463283 |
| ITPKB    | ENSG00000143772.9  | 4.671783728 | 7.502359157 | 6.012321013 |
| PRNP     | ENSG00000171867.16 | 8.504062519 | 7.567171938 | 5.572366174 |
| TDP2     | ENSG00000111802.13 | 5.123258057 | 5.379295017 | 5.656853394 |
| TLK2     | ENSG00000146872.17 | 5.215950707 | 5.135892071 | 5.474427179 |
| CDIPT    | ENSG00000103502.13 | 5.797516531 | 5.267949994 | 5.088271489 |
| DDT      | ENSG00000099977.13 | 5.555770779 | 6.715659195 | 5.326498778 |
| EML4     | ENSG00000143924.18 | 5.471877219 | 5.990592979 | 4.701389823 |
| NSUN5    | ENSG00000130305.16 | 5.496332776 | 5.482492073 | 4.800076031 |

|          |                    |             |             |             |
|----------|--------------------|-------------|-------------|-------------|
| NUP50    | ENSG00000093000.18 | 6.124503956 | 6.228322484 | 5.779936859 |
| MORN2    | ENSG00000188010.12 | 5.098423266 | 4.996428357 | 4.765566646 |
| MARK2    | ENSG00000072518.20 | 5.445244624 | 5.117489626 | 5.072204331 |
| ADD3     | ENSG00000148700.14 | 6.105310721 | 5.267954195 | 6.409522644 |
| PIIH     | ENSG00000171960.10 | 7.113723633 | 5.631571283 | 4.744126979 |
| P4HA1    | ENSG00000122884.12 | 5.67791104  | 6.056134313 | 4.666245034 |
| USP10    | ENSG00000103194.15 | 6.301130695 | 5.621801521 | 5.645470703 |
| ST7      | ENSG00000004866.20 | 4.67114504  | 6.504395518 | 6.304233769 |
| TRIM37   | ENSG00000108395.13 | 4.739078415 | 5.169070232 | 5.356349864 |
| C11orf68 | ENSG00000175573.6  | 5.478789833 | 5.094547499 | 5.566522025 |
| SMARCA2  | ENSG00000080503.22 | 6.622752433 | 5.059060256 | 5.520946114 |
| NDUFA5   | ENSG00000128609.14 | 5.876152086 | 6.966085855 | 7.05072191  |
| IGF1R    | ENSG00000140443.13 | 6.245758544 | 5.488080763 | 5.860349434 |
| VARS2    | ENSG00000137411.16 | 5.164801277 | 5.022396435 | 7.09186947  |
| EP300    | ENSG00000100393.12 | 5.083173629 | 5.46345258  | 5.643113422 |
| CABIN1   | ENSG00000099991.17 | 4.696931708 | 5.2181581   | 5.636606903 |
| MT-TI    | ENSG00000210100.1  | 6.147253115 | 6.455215322 | 5.973682499 |
| AZI2     | ENSG00000163512.13 | 5.35958875  | 5.33654287  | 5.349161174 |
| PDE8A    | ENSG00000073417.14 | 4.729387781 | 5.554403896 | 5.047154216 |
| RNASEH2C | ENSG00000172922.8  | 5.567954337 | 5.189071537 | 4.891348341 |
| ASNSD1   | ENSG00000138381.9  | 5.177601273 | 5.892740365 | 5.421021214 |
| AP1M1    | ENSG00000072958.8  | 7.234807082 | 5.969080265 | 5.788655366 |
| OBSL1    | ENSG00000124006.14 | 6.625116096 | 4.688694957 | 5.249051528 |
| DDX54    | ENSG00000123064.12 | 6.232693937 | 5.615259598 | 4.653159861 |
| NFS1     | ENSG00000244005.12 | 5.93132743  | 4.733276441 | 5.736528683 |
| MEAF6    | ENSG00000163875.15 | 5.431202718 | 4.741708343 | 5.059456355 |
| PPP2R5D  | ENSG00000112640.14 | 5.456318463 | 5.240085981 | 5.577278797 |
| SMAD5    | ENSG00000113658.16 | 5.310417079 | 4.717450692 | 5.47790777  |
| PHRF1    | ENSG00000070047.11 | 5.183213215 | 5.277037313 | 5.314871361 |
| RB1CC1   | ENSG00000023287.12 | 5.596372244 | 5.558791532 | 5.897141078 |
| GUCD1    | ENSG00000138867.16 | 5.106072014 | 5.4564403   | 5.080749513 |
| AMMECR1L | ENSG00000144233.9  | 4.682781802 | 6.194396635 | 4.880364185 |
| SMG1     | ENSG00000157106.16 | 5.413743492 | 5.320488171 | 5.482437164 |
| LPCAT3   | ENSG00000111684.10 | 6.085137536 | 4.877841154 | 4.732811333 |
| IFI35    | ENSG00000068079.7  | 5.614123856 | 5.574529181 | 5.57498172  |
| PAPD4    | ENSG00000164329.13 | 5.250411634 | 4.988900949 | 5.720918122 |
| NOC4L    | ENSG00000184967.6  | 5.625813164 | 4.716428894 | 5.683621561 |
| TBC1D7   | ENSG00000145979.17 | 4.796985621 | 7.700875068 | 7.790529724 |
| SFSWAP   | ENSG00000061936.9  | 5.777509409 | 4.990985201 | 7.394963562 |
| RRP9     | ENSG00000114767.6  | 6.280036467 | 6.176761211 | 4.663535843 |
| EXTL3    | ENSG00000012232.8  | 4.661404537 | 5.677341623 | 4.873366995 |
| ETV1     | ENSG00000006468.13 | 5.737080716 | 5.360112084 | 5.250691091 |
| HTATIP2  | ENSG00000109854.13 | 6.109285655 | 7.036528268 | 6.80448354  |
| PPP2R2A  | ENSG00000221914.9  | 6.101921138 | 6.033044664 | 5.086179025 |
| DPH5     | ENSG00000117543.20 | 5.050957969 | 5.122688702 | 5.396376409 |
| TXNDC11  | ENSG00000153066.12 | 4.898400056 | 4.738998751 | 5.131265501 |

|          |                    |             |             |             |
|----------|--------------------|-------------|-------------|-------------|
| NT5C2    | ENSG00000076685.18 | 5.605399318 | 4.800939294 | 5.37587907  |
| ABI1     | ENSG00000136754.17 | 4.882623386 | 5.151584431 | 5.734536406 |
| WSB1     | ENSG00000109046.14 | 4.748313647 | 6.020453077 | 6.226747422 |
| COMMD6   | ENSG00000188243.12 | 5.159842613 | 5.22446824  | 4.834398694 |
| THUMPD1  | ENSG00000066654.13 | 5.428761421 | 4.723165088 | 4.641231236 |
| ADCK2    | ENSG00000133597.10 | 5.188581606 | 5.142280994 | 6.270840007 |
| NSA2     | ENSG00000164346.9  | 5.925219106 | 4.612897563 | 5.350732685 |
| BAD      | ENSG00000002330.13 | 5.956609214 | 4.798284121 | 6.153181249 |
| TAF1C    | ENSG00000103168.16 | 5.111574836 | 6.466373366 | 5.325737054 |
| KIF22    | ENSG00000079616.12 | 6.827125581 | 5.105341086 | 4.635380688 |
| DCK      | ENSG00000156136.9  | 5.426835127 | 4.615963402 | 5.048820991 |
| STX12    | ENSG00000117758.13 | 5.05755248  | 4.827262411 | 5.201453687 |
| PRKACB   | ENSG00000142875.19 | 4.868042062 | 4.638952491 | 4.942741684 |
| WRNIP1   | ENSG00000124535.15 | 5.796580341 | 5.634555293 | 6.22333345  |
| ZNF664   | ENSG00000179195.15 | 5.799343678 | 5.862678303 | 6.518609702 |
| SETD7    | ENSG00000145391.13 | 5.4776915   | 4.637002227 | 4.985779346 |
| TROAP    | ENSG00000135451.12 | 6.090634103 | 4.854984609 | 4.703845744 |
| LMNB1    | ENSG00000113368.11 | 7.35662784  | 4.814680768 | 4.680739317 |
| MUM1     | ENSG00000160953.15 | 4.734074452 | 5.503395828 | 5.275699332 |
| TMEM183A | ENSG00000163444.11 | 6.357952044 | 5.363346455 | 4.660946977 |
| ARID1A   | ENSG00000117713.18 | 6.358334231 | 5.507978966 | 5.174590165 |
| PPRC1    | ENSG00000148840.10 | 5.907205032 | 4.986617633 | 4.832620214 |
| PPP4R1   | ENSG00000154845.15 | 5.109978705 | 5.781765253 | 5.213225557 |
| ZDHHC7   | ENSG00000153786.12 | 5.852546723 | 5.852301162 | 5.481666994 |
| STK17A   | ENSG00000164543.5  | 6.053661901 | 6.0162193   | 5.413334262 |
| SNAPIN   | ENSG00000143553.10 | 5.349515737 | 5.646711261 | 4.795534649 |
| MTERF3   | ENSG00000156469.8  | 5.660608146 | 4.922558397 | 4.961622222 |
| IPO11    | ENSG00000086200.16 | 5.404897728 | 4.61470737  | 4.797423677 |
| QSOX2    | ENSG00000165661.16 | 5.511528953 | 6.03071502  | 4.671993501 |
| TARS2    | ENSG00000143374.16 | 5.917133124 | 5.439487682 | 4.95496921  |
| CUEDC1   | ENSG00000180891.12 | 5.845716514 | 5.00167045  | 4.681196288 |
| CXXC1    | ENSG00000154832.14 | 5.573806396 | 5.474941755 | 5.143294457 |
| KRAS     | ENSG00000133703.11 | 5.505725541 | 5.066617847 | 6.489339426 |
| MTCO1P12 | ENSG00000237973.1  | 4.732481861 | 6.066158113 | 5.939026435 |
| HPS5     | ENSG00000110756.17 | 5.470580197 | 6.489065416 | 5.048417821 |
| KLHL12   | ENSG00000117153.15 | 5.52638402  | 5.285568587 | 4.677891426 |
| GIGYF1   | ENSG00000146830.9  | 4.870962467 | 5.878991933 | 4.968151801 |
| BIRC6    | ENSG00000115760.13 | 5.624985912 | 6.144245992 | 4.960011286 |
| PAXX     | ENSG00000148362.10 | 5.559494378 | 5.81453355  | 4.784594478 |
| MTMR6    | ENSG00000139505.11 | 4.875071011 | 4.61996333  | 4.829703545 |
| MAPK8IP3 | ENSG00000138834.12 | 4.794060601 | 5.010851349 | 5.601438161 |
| RABEP1   | ENSG00000029725.16 | 6.061518936 | 4.702162127 | 5.949418878 |
| HMGCS1   | ENSG00000112972.14 | 4.719945129 | 6.061466038 | 5.728366357 |
| ZCCHC11  | ENSG00000134744.13 | 5.361397029 | 5.018249848 | 5.184034773 |
| PRPSAP2  | ENSG00000141127.14 | 5.578330964 | 4.674930047 | 4.815168189 |
| LSM5     | ENSG00000106355.9  | 5.417901349 | 5.852103902 | 4.671550963 |

|          |                    |             |             |             |
|----------|--------------------|-------------|-------------|-------------|
| ENAH     | ENSG00000154380.17 | 7.490179591 | 4.842407422 | 6.304660446 |
| TAP2     | ENSG00000204267.13 | 5.189237897 | 5.458317895 | 4.655826412 |
| STK11IP  | ENSG00000144589.21 | 5.274792211 | 4.75988816  | 5.074440358 |
| MAPK9    | ENSG00000050748.17 | 5.23679293  | 4.718546177 | 5.653875925 |
| PLXNB2   | ENSG00000196576.14 | 6.490157647 | 8.001657739 | 8.214590646 |
| SNRPF    | ENSG00000139343.10 | 7.203141004 | 6.165449362 | 4.632334458 |
| SOX13    | ENSG00000143842.14 | 4.764039828 | 5.984024709 | 5.532750828 |
| GFPT1    | ENSG00000198380.12 | 5.008370064 | 6.281816344 | 5.424185692 |
| PDCD11   | ENSG00000148843.13 | 6.843905813 | 5.141575549 | 5.178842444 |
| MSMO1    | ENSG00000052802.12 | 4.649044884 | 6.539046889 | 6.193016058 |
| COX20    | ENSG00000203667.9  | 5.748130907 | 4.689127549 | 7.074038099 |
| CWC22    | ENSG00000163510.13 | 5.011998265 | 4.983757594 | 4.827264725 |
| POLR1A   | ENSG00000068654.15 | 5.069155301 | 5.645629827 | 4.638457638 |
| ZBED5    | ENSG00000236287.7  | 5.208395731 | 5.519576037 | 5.334218857 |
| TEX30    | ENSG00000151287.16 | 5.337996536 | 4.735396168 | 4.726776174 |
| EGLN1    | ENSG00000135766.8  | 5.131141181 | 5.059353989 | 5.379115562 |
| POM121   | ENSG00000196313.11 | 5.46504542  | 5.882129416 | 5.258303606 |
| RDH14    | ENSG00000240857.1  | 5.086404476 | 4.969884883 | 4.612460079 |
| SNRNP27  | ENSG00000124380.10 | 5.58102692  | 5.204930439 | 4.877605406 |
| PIGX     | ENSG00000163964.14 | 4.622372855 | 4.786425891 | 4.984441942 |
| ANAPC7   | ENSG00000196510.12 | 6.480464197 | 6.23763036  | 4.777480446 |
| RPE      | ENSG00000197713.14 | 5.317464577 | 6.341626801 | 6.044033559 |
| PPP3CA   | ENSG00000138814.16 | 4.854690899 | 5.177177742 | 5.91018485  |
| COPS4    | ENSG00000138663.8  | 5.270565417 | 4.674569698 | 5.639668038 |
| NECAB3   | ENSG00000125967.16 | 4.812475747 | 5.3902309   | 5.796912604 |
| VKORC1L1 | ENSG00000196715.5  | 5.141241712 | 5.713813643 | 4.650503994 |
| SNHG16   | ENSG00000163597.14 | 5.674536135 | 5.634009277 | 6.491613914 |
| ACVR1    | ENSG00000115170.13 | 4.633196773 | 5.355380913 | 5.859065806 |
| MGRN1    | ENSG00000102858.12 | 5.344230751 | 5.359015313 | 5.209083463 |
| ARL5A    | ENSG00000162980.16 | 4.643796762 | 5.49984355  | 5.113615583 |
| DNAJC14  | ENSG00000135392.15 | 5.76487508  | 5.658233068 | 5.164159935 |
| CYHR1    | ENSG00000187954.12 | 4.725619301 | 5.399583105 | 5.448939069 |
| SIL1     | ENSG00000120725.12 | 4.750865649 | 4.90757858  | 5.087321995 |
| NSRP1    | ENSG00000126653.17 | 5.458865671 | 5.915773026 | 6.275978043 |
| USP47    | ENSG00000170242.17 | 4.699042276 | 4.959512611 | 5.472611881 |
| FOXK1    | ENSG00000164916.10 | 4.917566156 | 5.411176356 | 5.205881088 |
| TP53I13  | ENSG00000167543.15 | 5.047039516 | 5.404812269 | 5.695771283 |
| PLPBP    | ENSG00000147471.11 | 4.679708058 | 5.206715687 | 5.462281662 |
| R3HDM1   | ENSG00000048991.16 | 5.46361551  | 5.345677682 | 5.516775064 |
| TUBB2A   | ENSG00000137267.5  | 4.835276513 | 6.976257757 | 4.716752084 |
| INTS10   | ENSG00000104613.11 | 5.813967719 | 4.646721081 | 5.182697596 |
| ACBD5    | ENSG00000107897.18 | 5.181534942 | 4.796768537 | 4.967213387 |
| PHF6     | ENSG00000156531.16 | 5.467256346 | 5.054472422 | 4.740721979 |
| CASP3    | ENSG00000164305.18 | 5.68581228  | 4.626098296 | 4.858305203 |
| LZTS2    | ENSG00000107816.17 | 6.378353892 | 5.320207238 | 5.935852478 |
| ELP6     | ENSG00000163832.15 | 6.533366462 | 5.627106232 | 4.659332452 |

|          |                    |             |             |             |
|----------|--------------------|-------------|-------------|-------------|
| SAP130   | ENSG00000136715.17 | 4.615803814 | 5.245065082 | 4.71367927  |
| KDELC2   | ENSG00000178202.12 | 5.458449067 | 4.674463526 | 5.638338716 |
| TELO2    | ENSG00000100726.14 | 5.156368254 | 4.889521818 | 5.612205541 |
| CSTF2    | ENSG00000101811.13 | 6.373584637 | 5.379734236 | 4.681986935 |
| KCMF1    | ENSG00000176407.17 | 4.692705901 | 4.691962456 | 4.64296969  |
| ABL1     | ENSG00000097007.17 | 6.019466119 | 6.59236159  | 4.819811299 |
| CSNK1G3  | ENSG00000151292.17 | 5.736863263 | 4.650259471 | 5.332253609 |
| HARS2    | ENSG00000112855.14 | 5.935832894 | 4.903099348 | 5.002174877 |
| TSN      | ENSG00000211460.11 | 5.049952633 | 5.800540894 | 6.503583052 |
| R3HDM4   | ENSG00000198858.9  | 5.290900966 | 6.347367186 | 5.528610832 |
| AEN      | ENSG00000181026.14 | 6.253651432 | 6.860517369 | 6.632303793 |
| CD46     | ENSG00000117335.19 | 5.47254528  | 5.177981562 | 4.785158352 |
| CHCHD1   | ENSG00000172586.7  | 5.746660461 | 5.193481506 | 5.777414895 |
| PIKFYVE  | ENSG00000115020.16 | 4.674939703 | 5.216349246 | 5.240422593 |
| ACAP2    | ENSG00000114331.13 | 4.626604043 | 6.06170401  | 5.711052366 |
| SCNM1    | ENSG00000163156.11 | 6.648457192 | 5.964925957 | 4.761997735 |
| CDK13    | ENSG00000065883.14 | 5.407444122 | 5.287431995 | 5.393241113 |
| TRAK1    | ENSG00000182606.14 | 4.792901514 | 5.651385129 | 5.132636013 |
| COG4     | ENSG00000103051.18 | 5.482932192 | 5.36300729  | 5.345262929 |
| KCTD10   | ENSG00000110906.12 | 5.611121172 | 5.458417674 | 4.624408813 |
| ADPGK    | ENSG00000159322.17 | 5.196730421 | 5.303264913 | 4.755274384 |
| ACOT9    | ENSG00000123130.16 | 5.69765036  | 4.673722091 | 4.991217559 |
| NEMF     | ENSG00000165525.17 | 4.810416626 | 4.65168864  | 4.908113291 |
| ELP3     | ENSG00000134014.16 | 5.24400331  | 4.838748465 | 4.784694758 |
| CDC42SE1 | ENSG00000197622.12 | 6.346407481 | 6.373130463 | 5.101949005 |
| SNX12    | ENSG00000147164.11 | 5.40067234  | 5.630313728 | 5.894511105 |
| NFYA     | ENSG00000001167.14 | 5.020256499 | 4.82533739  | 5.940915691 |
| RAB3GAP1 | ENSG00000115839.17 | 4.611866228 | 5.158475722 | 5.297910092 |
| PNISR    | ENSG00000132424.14 | 5.896122933 | 4.694801422 | 5.256274948 |
| PPP1R37  | ENSG00000104866.10 | 4.681584921 | 5.236733685 | 6.807389717 |
| PDXK     | ENSG00000160209.18 | 4.769978005 | 5.552137546 | 5.447201366 |
| ROCK2    | ENSG00000134318.13 | 6.017454164 | 5.005850744 | 4.614328892 |
| PMVK     | ENSG00000163344.5  | 5.738268351 | 5.606538927 | 4.663299136 |
| CDK6     | ENSG00000105810.9  | 6.050447204 | 4.99053884  | 5.146891975 |
| SOX12    | ENSG00000177732.8  | 4.632320846 | 5.768303328 | 4.619748353 |
| NEK7     | ENSG00000151414.14 | 6.057943662 | 4.769118134 | 6.339022702 |
| NSFL1C   | ENSG00000088833.17 | 5.872259399 | 6.067727287 | 4.698765989 |
| STK4     | ENSG00000101109.11 | 5.283302861 | 4.857422355 | 5.337989203 |
| BRCA1    | ENSG00000012048.20 | 5.323658224 | 4.829836526 | 4.694967461 |
| RNF13    | ENSG00000082996.19 | 4.633376421 | 5.398405393 | 5.63183159  |
| SSH2     | ENSG00000141298.17 | 5.190404249 | 5.891089441 | 5.511600223 |
| NOM1     | ENSG00000146909.7  | 5.083132482 | 5.221512495 | 4.658733144 |
| DTX3L    | ENSG00000163840.9  | 4.975583981 | 4.582183159 | 5.564132544 |
| BPNT1    | ENSG00000162813.17 | 6.240411246 | 4.885784611 | 4.672369157 |
| ABHD14B  | ENSG00000114779.19 | 6.251730072 | 4.861317921 | 4.908082981 |
| PANX1    | ENSG00000110218.8  | 4.616978749 | 4.759842808 | 5.299905139 |



|          |                    |             |             |             |
|----------|--------------------|-------------|-------------|-------------|
| SORT1    | ENSG00000134243.11 | 4.67323478  | 7.099104831 | 6.798785072 |
| VPS41    | ENSG00000006715.15 | 4.596340969 | 6.207713024 | 5.84176161  |
| ATF2     | ENSG00000115966.16 | 4.788120893 | 5.223934822 | 5.595820159 |
| CASC4    | ENSG00000166734.18 | 5.846235692 | 5.660360002 | 5.599531122 |
| C11orf98 | ENSG00000278615.4  | 6.86971924  | 4.86251913  | 5.926378482 |
| HMGN4    | ENSG00000182952.4  | 6.252715569 | 6.230497366 | 6.697088315 |
| SENP6    | ENSG00000112701.17 | 5.605917775 | 5.328841833 | 5.421299696 |
| HSPA1B   | ENSG00000204388.6  | 4.575986227 | 5.258346723 | 5.217277218 |
| RRP1     | ENSG00000160214.12 | 4.802408231 | 5.326746619 | 5.051696109 |
| STRN3    | ENSG00000196792.11 | 4.858256724 | 4.63645004  | 5.156620503 |
| HMBS     | ENSG00000256269.7  | 6.057936177 | 4.592469681 | 4.979118323 |
| LZIC     | ENSG00000162441.11 | 5.40585477  | 4.941672538 | 5.049496825 |
| PPP1R2   | ENSG00000184203.7  | 4.573265235 | 5.411397761 | 5.508842154 |
| FLOT2    | ENSG00000132589.15 | 5.74942968  | 5.672493671 | 6.23960597  |
| TMEM43   | ENSG00000170876.7  | 6.483386898 | 6.567795098 | 4.622278162 |
| TMEM160  | ENSG00000130748.6  | 5.622051952 | 4.83874589  | 5.556895059 |
| ITFG1    | ENSG00000129636.12 | 5.49778835  | 4.659062915 | 5.608777376 |
| C19orf48 | ENSG00000167747.14 | 6.201693252 | 5.773099267 | 4.765809236 |
| ZNF217   | ENSG00000171940.13 | 6.061373503 | 4.621482711 | 5.144763508 |
| KIF1BP   | ENSG00000198954.7  | 5.085312649 | 4.98417752  | 4.844866555 |
| ITGB3BP  | ENSG00000142856.16 | 5.913635737 | 5.254036203 | 5.124367711 |
| QTRT1    | ENSG00000213339.8  | 5.636823686 | 5.122928862 | 4.869933459 |
| INPP5F   | ENSG00000198825.12 | 8.16940085  | 5.146432353 | 7.101018445 |
| CDK10    | ENSG00000185324.21 | 5.66737254  | 4.999213283 | 5.216543809 |
| NAXD     | ENSG00000213995.11 | 5.783317946 | 4.974735479 | 4.95834016  |
| IFT52    | ENSG00000101052.12 | 5.41227451  | 4.823466507 | 5.432268613 |
| GNB4     | ENSG00000114450.9  | 4.582143916 | 5.757871007 | 4.78472748  |
| RAB32    | ENSG00000118508.4  | 4.610910715 | 7.780624534 | 6.767838837 |
| DLAT     | ENSG00000150768.15 | 5.4549096   | 4.718744477 | 5.361910191 |
| DGAT1    | ENSG00000185000.11 | 5.194060411 | 4.725889004 | 4.969390151 |
| BICD2    | ENSG00000185963.13 | 5.495624831 | 6.485045579 | 4.607686134 |
| HIRA     | ENSG00000100084.14 | 5.153237432 | 4.805569833 | 5.035374206 |
| JARID2   | ENSG00000008083.13 | 4.832326177 | 5.022518218 | 5.458870492 |
| LRRC47   | ENSG00000130764.9  | 5.851640429 | 5.290911302 | 4.960323983 |
| ATF7     | ENSG00000170653.18 | 4.630164345 | 4.993690583 | 4.997529622 |
| BAG3     | ENSG00000151929.9  | 7.138733632 | 5.305016679 | 6.160172239 |
| KATNB1   | ENSG00000140854.12 | 5.88159389  | 4.585167985 | 4.913012358 |
| TBCD     | ENSG00000141556.20 | 4.624978496 | 5.045801076 | 5.679541307 |
| EXOC1    | ENSG00000090989.17 | 5.166273156 | 4.655607576 | 4.61754793  |
| ACAD9    | ENSG00000177646.18 | 5.284100644 | 5.506837095 | 4.577548584 |
| ECI1     | ENSG00000167969.12 | 5.153373584 | 4.800450921 | 5.713963896 |
| RPAP3    | ENSG00000005175.9  | 5.893929575 | 4.645450022 | 4.704660381 |
| CDC5L    | ENSG00000096401.7  | 5.086916724 | 4.725618549 | 5.19677227  |
| HMGN3    | ENSG00000118418.14 | 6.16697104  | 5.923376375 | 4.61353956  |
| PRPSAP1  | ENSG00000161542.16 | 4.855099006 | 4.923011325 | 6.531479013 |
| PDRG1    | ENSG00000088356.5  | 4.670661266 | 4.622737094 | 5.205308911 |

|          |                    |             |             |             |
|----------|--------------------|-------------|-------------|-------------|
| TSFM     | ENSG00000123297.17 | 5.562474263 | 5.028286978 | 7.033577791 |
| BAIAP2   | ENSG00000175866.15 | 4.870561672 | 5.092307202 | 5.943107649 |
| CUX1     | ENSG00000257923.9  | 4.840075886 | 5.620558593 | 5.454713777 |
| ZFAND1   | ENSG00000104231.10 | 5.331071341 | 5.254170827 | 5.55490748  |
| LEO1     | ENSG00000166477.12 | 6.252965648 | 5.67722424  | 4.593403567 |
| POLR1E   | ENSG00000137054.15 | 6.17109979  | 4.840400308 | 4.879816204 |
| MAP3K3   | ENSG00000198909.7  | 4.707177142 | 4.651669955 | 4.821722461 |
| ZDHC8    | ENSG00000099904.15 | 4.920899315 | 6.129299992 | 4.649063836 |
| FLYWCH2  | ENSG00000162076.12 | 5.334959125 | 5.014268164 | 5.07982579  |
| ZFYVE16  | ENSG00000039319.16 | 4.772677977 | 7.235187355 | 6.410655426 |
| ATRN     | ENSG00000088812.17 | 5.840588562 | 6.159020154 | 4.620298373 |
| KAT2B    | ENSG00000114166.7  | 5.288818558 | 4.853495741 | 5.506102525 |
| PHKG2    | ENSG00000156873.15 | 4.973259526 | 5.066637057 | 4.593872184 |
| CHCHD10  | ENSG00000250479.8  | 4.784973    | 7.765814602 | 8.014740714 |
| SELENOF  | ENSG00000183291.15 | 6.107273633 | 6.184666208 | 6.529952018 |
| LUC7L    | ENSG00000007392.16 | 5.387419432 | 4.775587161 | 4.79325237  |
| SH3BP1   | ENSG00000100092.20 | 4.565745584 | 5.334700834 | 5.641153191 |
| INO80E   | ENSG00000169592.14 | 5.844129608 | 5.013510459 | 4.920792125 |
| PSMC1    | ENSG00000100764.13 | 7.139290279 | 6.158963089 | 4.683667517 |
| FBRS     | ENSG00000156860.15 | 5.728029492 | 5.017200433 | 5.728413655 |
| ANXA11   | ENSG00000122359.17 | 7.333576444 | 6.438989288 | 6.983670354 |
| VRK2     | ENSG00000028116.16 | 4.863403864 | 5.065705404 | 5.25473415  |
| C18orf8  | ENSG00000141452.9  | 4.918542044 | 5.562507722 | 5.088092416 |
| PQLC2    | ENSG00000040487.12 | 4.870239398 | 4.936365216 | 4.956478188 |
| LIMA1    | ENSG00000050405.13 | 6.494768661 | 5.656006262 | 4.868436949 |
| SRSF4    | ENSG00000116350.16 | 5.537830857 | 5.108344559 | 5.241968203 |
| NKTR     | ENSG00000114857.17 | 4.981428522 | 5.052285026 | 4.742382751 |
| CHTF8    | ENSG00000168802.12 | 5.749170314 | 5.270678649 | 4.676653031 |
| MARF1    | ENSG00000166783.21 | 5.812343799 | 4.759451801 | 6.315146778 |
| AREL1    | ENSG00000119682.16 | 5.154672808 | 4.720090498 | 4.627650048 |
| KLHL7    | ENSG00000122550.17 | 5.121377199 | 5.445643993 | 5.590845541 |
| THYN1    | ENSG00000151500.14 | 6.192207887 | 5.036042302 | 5.063956514 |
| COPS7B   | ENSG00000144524.17 | 4.573120746 | 5.581061222 | 4.989401756 |
| KLHDC10  | ENSG00000128607.13 | 4.574189061 | 5.585652642 | 5.730337745 |
| NBPF15   | ENSG00000266338.6  | 5.340227306 | 5.637576596 | 4.855891681 |
| ECHDC1   | ENSG00000093144.18 | 5.31527976  | 5.117430471 | 5.321398334 |
| PTGES2   | ENSG00000148334.14 | 5.29265359  | 5.822652058 | 4.786056977 |
| RAB3GAP2 | ENSG00000118873.15 | 5.469488286 | 4.535948895 | 4.671854042 |
| ZNF639   | ENSG00000121864.9  | 4.900053838 | 4.920149553 | 4.765897505 |
| NDFIP2   | ENSG00000102471.13 | 5.944420555 | 4.890932987 | 5.064362511 |
| ADAM17   | ENSG00000151694.12 | 5.372857746 | 5.409481078 | 4.533499135 |
| IRF2BPL  | ENSG00000119669.4  | 6.324238703 | 5.225068309 | 5.568004601 |
| ACOT8    | ENSG00000101473.16 | 5.366942252 | 5.060461651 | 4.569218911 |
| OSGIN2   | ENSG00000164823.9  | 4.548373106 | 5.128620218 | 5.291769291 |
| CBX5     | ENSG00000094916.15 | 6.096925121 | 4.727627103 | 5.32691339  |
| SMIM7    | ENSG00000214046.8  | 5.407045981 | 6.337072297 | 4.832696787 |

|          |                    |             |             |             |
|----------|--------------------|-------------|-------------|-------------|
| ASAP2    | ENSG00000151693.10 | 5.054468954 | 5.171294861 | 4.529968573 |
| RAVER1   | ENSG00000161847.13 | 6.223129191 | 5.137548569 | 5.310108161 |
| IPO9     | ENSG00000198700.9  | 6.08574358  | 5.036323856 | 4.569584139 |
| SBF1     | ENSG00000100241.20 | 5.234242035 | 5.80404332  | 6.555056042 |
| RAB8A    | ENSG00000167461.11 | 6.187615397 | 5.578912514 | 4.815621161 |
| MDC1     | ENSG00000137337.14 | 5.13948879  | 5.151058961 | 5.685735151 |
| DGCR6L   | ENSG00000128185.9  | 4.739516589 | 5.154143317 | 5.360337044 |
| AMPD2    | ENSG00000116337.15 | 5.739984409 | 6.174518564 | 4.629944993 |
| FAH      | ENSG00000103876.11 | 4.713887424 | 5.670386641 | 6.782256431 |
| DEAF1    | ENSG00000177030.16 | 4.598595874 | 5.130006905 | 4.58207764  |
| ALG2     | ENSG00000119523.9  | 4.895992209 | 6.091247782 | 4.65724226  |
| CRYZ     | ENSG00000116791.13 | 5.471884095 | 6.073203531 | 4.646876268 |
| MEF2D    | ENSG00000116604.17 | 5.067688239 | 6.351841665 | 5.338160755 |
| SMARCAD1 | ENSG00000163104.17 | 5.34697453  | 4.616515104 | 4.80239547  |
| OXR1     | ENSG00000164830.18 | 5.107359276 | 4.673981604 | 5.806722419 |
| EIPR1    | ENSG00000032389.12 | 5.312646258 | 5.092228741 | 4.896393064 |
| PCED1A   | ENSG00000132635.16 | 5.756851006 | 5.562163707 | 4.642387862 |
| SUGP1    | ENSG00000105705.15 | 5.697892931 | 5.450038748 | 4.578707642 |
| CA5BP1   | ENSG00000186312.10 | 5.112142206 | 4.527002096 | 5.158609223 |
| AMD1     | ENSG00000123505.15 | 6.175636105 | 5.748081148 | 5.00981156  |
| MOV10    | ENSG00000155363.18 | 5.246759263 | 5.14724961  | 4.617972612 |
| PNPLA6   | ENSG00000032444.15 | 6.446133403 | 5.740674079 | 5.983709303 |
| SEN2     | ENSG00000163904.12 | 4.6947995   | 5.777179414 | 5.041950982 |
| RXRB     | ENSG00000204231.10 | 5.291562549 | 4.916685961 | 5.988224135 |
| TNS3     | ENSG00000136205.16 | 5.967666881 | 6.03259386  | 4.745261797 |
| NCK2     | ENSG00000071051.13 | 4.57212916  | 6.843005347 | 6.742014567 |
| SH3GLB1  | ENSG00000097033.14 | 4.55429978  | 4.983391689 | 5.567048569 |
| IRF3     | ENSG00000126456.15 | 5.503472845 | 5.756495559 | 5.032206563 |
| MYBBP1A  | ENSG00000132382.14 | 6.822782424 | 5.286050723 | 4.740468217 |
| ST3GAL5  | ENSG00000115525.17 | 4.843632473 | 5.488416504 | 5.641556953 |
| TP53BP1  | ENSG00000067369.13 | 5.288030937 | 5.615078404 | 5.267949416 |
| CRIP1    | ENSG00000119878.5  | 5.722998206 | 5.329960593 | 4.569324499 |
| ABHD10   | ENSG00000144827.8  | 5.482302602 | 5.810235772 | 4.918636007 |
| HS2ST1   | ENSG00000153936.16 | 4.580057646 | 5.125898633 | 5.865169681 |
| SFT2D2   | ENSG00000213064.9  | 6.081714151 | 7.278410206 | 4.581064037 |
| IBTK     | ENSG00000005700.14 | 5.931910755 | 5.185307877 | 4.567906485 |
| CKAP4    | ENSG00000136026.13 | 6.918670683 | 6.573859891 | 4.535951153 |
| MAP3K13  | ENSG00000073803.13 | 4.531028443 | 5.918513176 | 5.865628647 |
| ZWINT    | ENSG00000122952.16 | 6.084479234 | 4.643642622 | 4.995963732 |
| MRPL55   | ENSG00000162910.18 | 5.409748277 | 4.631301338 | 4.766172768 |
| PFDN1    | ENSG00000113068.9  | 5.608379808 | 4.715692215 | 6.406642307 |
| CDK5RAP2 | ENSG00000136861.17 | 5.495486048 | 6.499509159 | 4.580545383 |
| NCAPG    | ENSG00000109805.9  | 6.61815438  | 4.58126323  | 5.326094968 |
| CC2D1B   | ENSG00000154222.14 | 5.502692342 | 5.344839914 | 4.949106013 |
| HEBP1    | ENSG00000013583.8  | 4.594064626 | 5.721668731 | 5.943015593 |
| MLLT6    | ENSG00000275023.4  | 5.828016458 | 5.519827326 | 6.672976088 |

|            |                    |             |             |             |
|------------|--------------------|-------------|-------------|-------------|
| CAMLG      | ENSG00000164615.4  | 5.766015053 | 4.545744446 | 5.499242831 |
| WRAP73     | ENSG00000116213.15 | 6.363053887 | 5.525752173 | 5.197551021 |
| TTC9C      | ENSG00000162222.13 | 5.218554222 | 5.316260525 | 5.19424925  |
| ABCC5      | ENSG00000114770.16 | 4.550301232 | 5.666711296 | 6.091394721 |
| CCDC59     | ENSG00000133773.11 | 6.15720812  | 5.162806914 | 5.409238845 |
| PSENEEN    | ENSG00000205155.7  | 5.79490379  | 5.697529749 | 4.953937592 |
| LRR42      | ENSG00000116212.14 | 5.045622853 | 5.619520934 | 4.62516381  |
| ST5        | ENSG00000166444.18 | 4.679914774 | 5.772667061 | 5.917758449 |
| VASP       | ENSG00000125753.13 | 5.942968638 | 4.992371859 | 4.733722437 |
| PCID2      | ENSG00000126226.21 | 6.381355168 | 4.969816155 | 4.602036591 |
| KLC2       | ENSG00000174996.11 | 5.879479797 | 5.304573475 | 6.439541983 |
| TOMM5      | ENSG00000175768.12 | 7.319687497 | 6.223741462 | 4.622984566 |
| DPY19L4    | ENSG00000156162.16 | 4.725890396 | 4.704858193 | 4.551075605 |
| SSR1       | ENSG00000124783.12 | 5.692785808 | 5.694949588 | 6.121786464 |
| SP3        | ENSG00000172845.14 | 5.093550507 | 5.178966632 | 5.267725188 |
| GNPNAT1    | ENSG00000100522.8  | 5.581895758 | 4.578728899 | 4.926576196 |
| TOM1L1     | ENSG00000141198.15 | 4.835412887 | 5.680574913 | 6.295515041 |
| TBC1D17    | ENSG00000104946.12 | 5.365286693 | 5.559856835 | 5.831828651 |
| COL6A2     | ENSG00000142173.14 | 6.225240589 | 4.716735546 | 6.745928616 |
| PREP       | ENSG00000085377.13 | 6.300203487 | 5.785615384 | 4.546232546 |
| SIKE1      | ENSG00000052723.11 | 5.049075551 | 4.674466275 | 4.592622389 |
| STX5       | ENSG00000162236.11 | 5.696947606 | 5.108409618 | 4.994270738 |
| SLC20A2    | ENSG00000168575.9  | 5.025932767 | 5.173913993 | 5.593165332 |
| AC115223.1 | ENSG00000243199.1  | 6.584528233 | 5.421828921 | 4.598499192 |
| NPRL3      | ENSG00000103148.15 | 5.842468079 | 4.587420789 | 5.259652775 |
| TMEM69     | ENSG00000159596.6  | 5.712679005 | 5.523188778 | 4.966577003 |
| KDELR3     | ENSG00000100196.10 | 4.884636703 | 7.38333096  | 4.607682452 |
| NFX1       | ENSG00000086102.18 | 5.888673126 | 4.731816153 | 4.498644248 |
| TIMM8B     | ENSG00000150779.11 | 5.663677098 | 5.129648842 | 5.208490319 |
| CLPX       | ENSG00000166855.9  | 5.796350651 | 5.578032603 | 4.968014978 |
| PRMT3      | ENSG00000185238.12 | 5.431107069 | 5.135167998 | 4.744732053 |
| WDR83OS    | ENSG00000105583.9  | 7.257604421 | 5.202322428 | 4.878138245 |
| NCLN       | ENSG00000125912.10 | 5.565247359 | 5.965818391 | 4.737714597 |
| GJC1       | ENSG00000182963.9  | 5.042443885 | 4.80747257  | 4.856725501 |
| MYCBP2     | ENSG00000005810.17 | 5.036248403 | 4.782465811 | 4.907557998 |
| CNOT10     | ENSG00000182973.18 | 5.796777994 | 5.149724756 | 5.19144037  |
| ANXA4      | ENSG00000196975.15 | 5.413775638 | 5.842117466 | 5.576468041 |
| FAM192A    | ENSG00000172775.16 | 6.346395388 | 5.42511904  | 6.179371921 |
| MTHFS      | ENSG00000136371.10 | 5.44850307  | 5.58118954  | 5.649658245 |
| THAP9-AS1  | ENSG00000251022.6  | 4.787310441 | 5.214161412 | 5.093279004 |
| NECAP2     | ENSG00000157191.19 | 5.208892224 | 4.92615107  | 5.157005836 |
| GRK2       | ENSG00000173020.10 | 5.597205661 | 5.372482757 | 5.442985083 |
| ALDH18A1   | ENSG00000059573.8  | 7.074554115 | 6.23404868  | 4.53533689  |
| BCAP29     | ENSG00000075790.10 | 4.608291682 | 5.673258108 | 5.32654291  |
| LEMD2      | ENSG00000161904.11 | 4.722111782 | 5.107327262 | 5.288959579 |
| NAV1       | ENSG00000134369.15 | 4.808947626 | 5.326316462 | 4.581427958 |

|            |                    |             |             |             |
|------------|--------------------|-------------|-------------|-------------|
| NELFB      | ENSG00000188986.6  | 6.034527955 | 6.059788977 | 4.62069744  |
| COMT       | ENSG00000093010.13 | 5.74288159  | 6.15175718  | 6.410340245 |
| MPHOSPH10  | ENSG00000124383.8  | 6.111373024 | 5.825345304 | 4.577066163 |
| LSS        | ENSG00000160285.14 | 4.624396184 | 5.6691226   | 5.789118302 |
| MRPL57     | ENSG00000173141.4  | 5.41805488  | 4.786598873 | 4.481069681 |
| AC021078.1 | ENSG00000230551.4  | 4.696722686 | 4.560846778 | 4.977932303 |
| INTS9      | ENSG00000104299.14 | 4.699060761 | 4.853009299 | 5.125424842 |
| SHCBP1     | ENSG00000171241.8  | 6.095599386 | 4.954861055 | 4.503984351 |
| SRPRB      | ENSG00000144867.11 | 5.8996146   | 5.832353509 | 4.547878287 |
| ING5       | ENSG00000168395.15 | 4.564335846 | 4.766077686 | 5.055410774 |
| DNAJB2     | ENSG00000135924.15 | 4.622014447 | 5.528456888 | 5.551052908 |
| WDR33      | ENSG00000136709.11 | 4.782737026 | 4.804654013 | 4.547378983 |
| TMF1       | ENSG00000144747.15 | 5.032104286 | 5.085490427 | 4.669050673 |
| GTSE1      | ENSG00000075218.18 | 5.518969873 | 4.726175117 | 4.506304568 |
| CD55       | ENSG00000196352.14 | 6.074220604 | 5.282007493 | 6.266936279 |
| HTRA2      | ENSG00000115317.11 | 5.670826736 | 6.172719289 | 4.677131882 |
| NIPBL      | ENSG00000164190.17 | 5.038867701 | 5.236343062 | 5.325027327 |
| CCDC167    | ENSG00000198937.8  | 4.713455622 | 5.299914656 | 5.361801243 |
| RAPGEF1    | ENSG00000107263.18 | 4.855635892 | 6.714361835 | 4.877347694 |
| KPNA6      | ENSG00000025800.13 | 5.196388497 | 5.378877964 | 4.701916739 |
| IRF2       | ENSG00000168310.10 | 4.963885189 | 4.54897175  | 4.957865545 |
| KMT2D      | ENSG00000167548.14 | 5.36334158  | 5.356486177 | 4.918663949 |
| YEATS2     | ENSG00000163872.15 | 4.519925555 | 5.065057862 | 4.691966923 |
| KDSR       | ENSG00000119537.15 | 5.42763791  | 5.516387058 | 4.774792067 |
| AGPAT2     | ENSG00000169692.12 | 4.844950154 | 6.214419859 | 6.102383557 |
| C4orf3     | ENSG00000164096.12 | 4.650192061 | 5.250309484 | 5.610688052 |
| RTKN       | ENSG00000114993.16 | 5.829528674 | 6.392762288 | 4.952642184 |
| PPP1R8     | ENSG00000117751.17 | 5.550897232 | 4.899675987 | 4.807078444 |
| UBE2O      | ENSG00000175931.12 | 5.521325886 | 5.594937904 | 5.725375254 |
| CIT        | ENSG00000122966.15 | 5.303480257 | 4.559519576 | 6.093102225 |
| TOX4       | ENSG00000092203.13 | 4.994754483 | 4.833856831 | 5.486772967 |
| UACA       | ENSG00000137831.14 | 5.27801148  | 5.319818058 | 4.631117622 |
| DLEU1_2    | ENSG00000273541.1  | 5.580890383 | 4.670881272 | 5.890981148 |
| TGFBR2     | ENSG00000163513.17 | 4.86808449  | 5.313911412 | 4.683858641 |
| FAM103A1   | ENSG00000169612.3  | 5.299564183 | 4.881870984 | 5.216719875 |
| VPS26B     | ENSG00000151502.10 | 5.975663374 | 4.597938138 | 5.886619863 |
| HIKESHI    | ENSG00000149196.15 | 5.300199785 | 5.229318493 | 5.009733789 |
| MBD1       | ENSG00000141644.17 | 5.081324958 | 5.413677971 | 4.890522816 |
| HK2        | ENSG00000159399.9  | 6.06305132  | 7.261608427 | 4.610105155 |
| ZC3H18     | ENSG00000158545.15 | 6.419795927 | 5.565978688 | 5.7931236   |
| MNT        | ENSG00000070444.14 | 4.842461756 | 4.849464134 | 5.43296219  |
| B4GALT2    | ENSG00000117411.16 | 6.017194857 | 5.847321358 | 4.751615142 |
| RMND5A     | ENSG00000153561.12 | 5.447218075 | 5.030049591 | 4.874504504 |
| ABCB6      | ENSG00000115657.12 | 5.08448785  | 5.367430695 | 4.546988731 |
| NECTIN2    | ENSG00000130202.9  | 4.552459258 | 5.293869801 | 5.076317113 |
| TLL4       | ENSG00000135912.10 | 4.666537237 | 4.789257983 | 5.198444004 |

|           |                    |             |             |             |
|-----------|--------------------|-------------|-------------|-------------|
| CLK2      | ENSG00000176444.18 | 5.907888276 | 5.425985822 | 4.500483684 |
| ISCA1     | ENSG00000135070.14 | 6.007987063 | 6.633050609 | 4.504297058 |
| PHTF2     | ENSG00000006576.16 | 4.627137119 | 5.044288897 | 5.221606007 |
| B3GNT2    | ENSG00000170340.10 | 4.505421255 | 6.363453764 | 6.565825301 |
| MVB12A    | ENSG00000141971.12 | 6.648088835 | 6.415973126 | 5.675105206 |
| EXOSC9    | ENSG00000123737.12 | 5.915161042 | 4.502587525 | 4.948572568 |
| SEH1L     | ENSG00000085415.15 | 5.739528935 | 5.360705164 | 4.857771838 |
| ZMYM3     | ENSG00000147130.14 | 5.157142618 | 5.455791699 | 4.874723224 |
| FAAP100   | ENSG00000185504.16 | 4.608761996 | 4.697260822 | 4.70356928  |
| SLAIN2    | ENSG00000109171.14 | 5.565355102 | 5.334794729 | 6.977978127 |
| HERC1     | ENSG00000103657.13 | 4.840102021 | 5.081993428 | 5.027999669 |
| UBTD2     | ENSG00000168246.5  | 5.139444932 | 4.460350087 | 4.514815927 |
| POGK      | ENSG00000143157.11 | 5.752065168 | 5.69358597  | 4.512772323 |
| SRSF8     | ENSG00000263465.4  | 5.453100273 | 4.854808925 | 6.028626811 |
| FNTA      | ENSG00000168522.12 | 4.581363879 | 5.214226749 | 4.857657683 |
| TCEAL3    | ENSG00000196507.10 | 4.489857412 | 5.300761838 | 5.143374101 |
| AKR1A1    | ENSG00000117448.13 | 5.784477925 | 6.417519924 | 6.430713543 |
| RRM2B     | ENSG00000048392.11 | 4.859980923 | 4.946867736 | 6.629862225 |
| METRNL    | ENSG00000176845.12 | 4.494594175 | 5.595939883 | 5.705338072 |
| ATP2B1    | ENSG00000070961.15 | 6.04299596  | 4.799541446 | 4.836428783 |
| PIK3C2A   | ENSG00000011405.13 | 4.523946463 | 5.711067084 | 5.137745852 |
| MRS2      | ENSG00000124532.14 | 4.621804956 | 5.362907093 | 5.218006368 |
| CKAP2     | ENSG00000136108.14 | 6.220074708 | 4.596997971 | 4.803513021 |
| PUM3      | ENSG00000080608.9  | 7.485953367 | 5.957640366 | 4.562306312 |
| TCEA2     | ENSG00000171703.16 | 5.485480163 | 5.394220229 | 4.924963021 |
| CHD6      | ENSG00000124177.14 | 4.639587792 | 4.949306316 | 4.829603683 |
| ANLN      | ENSG00000011426.10 | 7.103518166 | 6.188292152 | 4.835927234 |
| SPATA20   | ENSG00000006282.20 | 5.082125314 | 6.274827324 | 6.611204728 |
| MRPL30    | ENSG00000185414.19 | 5.055654551 | 5.381844511 | 4.699320922 |
| TCF3      | ENSG00000071564.14 | 5.217140967 | 5.468879119 | 5.0027002   |
| CREBBP    | ENSG00000005339.14 | 5.285366186 | 4.785721445 | 4.936538094 |
| NMRAL1    | ENSG00000153406.13 | 5.681312326 | 5.228312701 | 5.293878884 |
| POLR3K    | ENSG00000161980.5  | 6.183514338 | 5.088061405 | 5.061162612 |
| PACSIN3   | ENSG00000165912.15 | 6.816887677 | 5.632007246 | 5.845070577 |
| N4BP2L2   | ENSG00000244754.8  | 4.950189362 | 5.303218231 | 5.411573774 |
| MTA1      | ENSG00000182979.17 | 6.81826032  | 6.899614785 | 4.478186961 |
| HIBCH     | ENSG00000198130.15 | 4.713437114 | 5.078322573 | 5.887762343 |
| MRPL49    | ENSG00000149792.8  | 5.399769184 | 4.672563625 | 4.783616194 |
| TMEM128   | ENSG00000132406.11 | 5.124567279 | 4.600611447 | 6.600619915 |
| PAK4      | ENSG00000130669.17 | 6.143328597 | 4.895064706 | 5.096644109 |
| PHTF1     | ENSG00000116793.15 | 5.536290291 | 4.585957537 | 5.49457295  |
| PSMA3-AS1 | ENSG00000257621.7  | 4.782463774 | 4.513352216 | 5.810142427 |
| BYSL      | ENSG00000112578.9  | 5.488952909 | 5.464053009 | 4.861441043 |
| GUF1      | ENSG00000151806.13 | 5.715486533 | 5.054210763 | 6.306323784 |
| DHX32     | ENSG00000089876.11 | 5.925447186 | 5.210554383 | 5.755208563 |
| GOSR1     | ENSG00000108587.15 | 5.604167771 | 5.148884456 | 5.339860767 |

|           |                    |             |             |             |
|-----------|--------------------|-------------|-------------|-------------|
| GRAMD1A   | ENSG00000089351.14 | 5.870358546 | 6.202915135 | 5.897933435 |
| CAVIN3    | ENSG00000170955.9  | 6.510092971 | 6.205590105 | 5.067172659 |
| IPO13     | ENSG00000117408.10 | 5.560338198 | 5.977555339 | 4.860449975 |
| FUCA1     | ENSG00000179163.11 | 4.452165444 | 6.036340668 | 6.072163649 |
| HUS1      | ENSG00000136273.11 | 4.637668369 | 5.179810634 | 4.522647625 |
| WDR41     | ENSG00000164253.13 | 5.034317015 | 4.905486681 | 4.827157226 |
| C14orf119 | ENSG00000179933.5  | 4.635124326 | 4.92711168  | 4.697255823 |
| VPS54     | ENSG00000143952.19 | 4.499268573 | 4.642196875 | 4.998177987 |
| GBE1      | ENSG00000114480.12 | 5.557921607 | 4.511994326 | 6.327749635 |
| SRGAP2    | ENSG00000266028.7  | 6.412784933 | 5.202810754 | 4.608734445 |
| BLZF1     | ENSG00000117475.13 | 5.545299297 | 5.327195075 | 4.494679098 |
| IFT172    | ENSG00000138002.14 | 4.575030759 | 4.718345709 | 4.483837265 |
| SMURF1    | ENSG00000198742.9  | 4.625226198 | 6.031271235 | 4.497749115 |
| GNPTG     | ENSG00000090581.9  | 4.668505556 | 5.649921025 | 6.144929786 |
| PKD2      | ENSG00000118762.7  | 4.535258384 | 4.467940206 | 5.043041912 |
| RARG      | ENSG00000172819.16 | 5.941137627 | 4.872613713 | 4.496618861 |
| DAPK3     | ENSG00000167657.13 | 5.566221437 | 6.10540058  | 5.411215994 |
| MOB1B     | ENSG00000173542.8  | 4.782226677 | 5.403262105 | 5.36347576  |
| PEX5      | ENSG00000139197.10 | 5.267663731 | 4.715733648 | 5.247083165 |
| ZNF410    | ENSG00000119725.18 | 5.209593582 | 4.538677789 | 5.073321712 |
| STK36     | ENSG00000163482.11 | 4.574431152 | 4.727758271 | 5.443331025 |
| FANCA     | ENSG00000187741.14 | 5.410832246 | 4.717697386 | 4.909273441 |
| TNFRSF12A | ENSG00000006327.13 | 6.783882221 | 6.490308569 | 5.330110969 |
| FRYL      | ENSG00000075539.14 | 5.043265847 | 5.084941726 | 5.281544758 |
| FAM177A1  | ENSG00000151327.12 | 4.609308682 | 5.054062381 | 5.310447447 |
| AHR       | ENSG00000106546.12 | 6.341614754 | 4.731704358 | 4.564937835 |
| FLAD1     | ENSG00000160688.18 | 5.761533359 | 5.793113273 | 4.78932083  |
| NSD2      | ENSG00000109685.17 | 6.362191828 | 4.517458874 | 6.159137735 |
| SOGA1     | ENSG00000149639.14 | 5.428690685 | 4.475037941 | 4.612827539 |
| TWSG1     | ENSG00000128791.11 | 4.516723094 | 5.244307302 | 4.630088939 |
| IFNAR1    | ENSG00000142166.12 | 5.002638148 | 4.825778567 | 4.474971564 |
| RAP1GDS1  | ENSG00000138698.14 | 6.139953028 | 4.696184263 | 5.315134205 |
| SS18L2    | ENSG00000008324.11 | 6.013730529 | 5.738575826 | 4.528547147 |
| DUSP23    | ENSG00000158716.8  | 5.637073927 | 6.348408908 | 4.49077425  |
| SMN1      | ENSG00000172062.16 | 5.516260191 | 4.463447072 | 4.795544064 |
| DHX37     | ENSG00000150990.7  | 5.492945764 | 5.042503286 | 5.528643696 |
| LYRM2     | ENSG00000083099.10 | 5.16115407  | 5.018328626 | 5.323576375 |
| PHF13     | ENSG00000116273.5  | 4.916522125 | 4.783192476 | 4.940796108 |
| ZNF282    | ENSG00000170265.11 | 5.525155043 | 4.787714207 | 4.542259615 |
| DNAJB14   | ENSG00000164031.16 | 4.472643147 | 5.425671394 | 4.969322606 |
| STRADA    | ENSG00000266173.6  | 4.695223614 | 5.084029555 | 5.27713612  |
| ITGA6     | ENSG00000091409.14 | 7.419802277 | 6.276158739 | 6.069971999 |
| MECP2     | ENSG00000169057.21 | 5.485597111 | 5.860897753 | 6.1284401   |
| PHF1      | ENSG00000112511.17 | 4.553807017 | 5.221612936 | 6.353557296 |
| ARFGEF1   | ENSG00000066777.8  | 5.151690101 | 5.045915727 | 5.389036013 |
| P3H1      | ENSG00000117385.15 | 6.056056733 | 6.170054844 | 4.623975924 |

|           |                    |             |             |             |
|-----------|--------------------|-------------|-------------|-------------|
| SHMT1     | ENSG00000176974.19 | 7.101064471 | 4.851349147 | 4.508954131 |
| TMEM222   | ENSG00000186501.14 | 5.248537296 | 4.91770901  | 4.435058784 |
| GNB5      | ENSG00000069966.18 | 4.582325271 | 5.022507924 | 5.031396301 |
| ME2       | ENSG00000082212.12 | 5.270969233 | 6.106998333 | 5.818695115 |
| TRMT1     | ENSG00000104907.12 | 5.967680239 | 5.24371056  | 4.706744569 |
| NAB2      | ENSG00000166886.12 | 5.858860806 | 6.155842233 | 5.140672218 |
| MPHOSPH6  | ENSG00000135698.9  | 5.434253142 | 4.836892187 | 4.880755172 |
| RAB11FIP3 | ENSG00000090565.15 | 4.832565171 | 4.667061639 | 5.099026277 |
| TIPARP    | ENSG00000163659.12 | 5.454184652 | 4.795091423 | 4.616117372 |
| MAN2A1    | ENSG00000112893.9  | 4.760731819 | 4.465045468 | 4.894462598 |
| CWC27     | ENSG00000153015.15 | 5.298413406 | 4.812614634 | 5.614709208 |
| CAB39     | ENSG00000135932.10 | 5.116867442 | 5.437214863 | 5.801290355 |
| ARMC8     | ENSG00000114098.17 | 4.978953264 | 4.727943591 | 4.628837758 |
| APBB1     | ENSG00000166313.18 | 4.786579079 | 6.579113992 | 6.366234607 |
| ATP8B2    | ENSG00000143515.16 | 6.490552974 | 7.010668744 | 4.472826482 |
| PCM1      | ENSG00000078674.17 | 5.976360881 | 4.589454567 | 6.967975501 |
| ANAPC13   | ENSG00000129055.12 | 5.495171179 | 5.372381408 | 5.104700698 |
| ANO10     | ENSG00000160746.12 | 4.818222407 | 5.114156191 | 4.727523264 |
| YIPF1     | ENSG00000058799.14 | 5.04450032  | 5.228297529 | 5.186444286 |
| RBM23     | ENSG00000100461.17 | 5.739959607 | 4.899927751 | 4.974002684 |
| DNAJC19   | ENSG00000205981.6  | 4.630036881 | 5.335374581 | 5.178159762 |
| ATF7IP    | ENSG00000171681.12 | 5.295418877 | 4.996036008 | 5.126396483 |
| DCXR      | ENSG00000169738.7  | 5.086952466 | 4.708672232 | 6.169231315 |
| EXOSC8    | ENSG00000120699.12 | 6.167022912 | 4.996961592 | 4.488142672 |
| APPL1     | ENSG00000157500.10 | 5.586697529 | 4.941169124 | 5.387213322 |
| ACAA2     | ENSG00000167315.17 | 5.021177179 | 5.50831579  | 5.803767777 |
| PANK2     | ENSG00000125779.21 | 6.59249667  | 6.77071322  | 4.569349548 |
| MOGS      | ENSG00000115275.11 | 6.091134618 | 6.662148155 | 4.768102127 |
| LMF2      | ENSG00000100258.17 | 4.771692908 | 6.419109993 | 5.576267851 |
| KCTD17    | ENSG00000100379.17 | 4.576411375 | 4.842687479 | 4.830669416 |
| ATXN2     | ENSG00000204842.14 | 5.814367301 | 5.269218155 | 4.570970186 |
| PIK3R2    | ENSG00000105647.16 | 5.839604237 | 6.291283649 | 5.716063155 |
| CHMP1A    | ENSG00000131165.14 | 6.386838287 | 5.801439519 | 6.473783698 |
| TRIM65    | ENSG00000141569.10 | 5.497741581 | 5.160197943 | 4.574311624 |
| ABCD4     | ENSG00000119688.20 | 4.874483274 | 4.498363811 | 4.546764155 |
| TBC1D1    | ENSG00000065882.15 | 5.956603027 | 4.553228547 | 7.2846496   |
| TMEM9B    | ENSG00000175348.10 | 4.78750542  | 5.153585767 | 5.491760465 |
| RTL8A     | ENSG00000203950.6  | 6.13639125  | 5.526553726 | 6.5189411   |
| FRG1CP    | ENSG00000282826.1  | 5.224439072 | 4.546563039 | 5.433794994 |
| NFU1      | ENSG00000169599.12 | 4.455450592 | 5.347355887 | 4.780974271 |
| MED14     | ENSG00000180182.10 | 5.508720766 | 4.651343458 | 5.085421528 |
| CDC25B    | ENSG00000101224.17 | 7.671328842 | 6.593032015 | 4.534817244 |
| YIPF2     | ENSG00000130733.10 | 6.122494067 | 5.679814265 | 4.805327389 |
| PGAM5     | ENSG00000247077.6  | 6.895896221 | 5.416250477 | 4.564268791 |
| YY1       | ENSG00000100811.12 | 5.789847482 | 5.408959756 | 4.443963485 |
| CDKN3     | ENSG00000100526.19 | 5.077313549 | 4.525237571 | 5.167646502 |



|            |                    |             |             |             |
|------------|--------------------|-------------|-------------|-------------|
| AP2A2      | ENSG00000183020.13 | 4.985552292 | 4.971412448 | 4.918890752 |
| TGIF1      | ENSG00000177426.20 | 5.667408316 | 7.3111512   | 5.744548463 |
| SETD2      | ENSG00000181555.20 | 5.102347194 | 5.115541686 | 4.471642966 |
| RBBP5      | ENSG00000117222.13 | 5.547553857 | 4.642737382 | 4.420321142 |
| MRPL22     | ENSG00000082515.17 | 5.119080129 | 4.466603506 | 4.531859529 |
| RPAIN      | ENSG00000129197.14 | 5.861303541 | 4.428852713 | 4.642272393 |
| MRPS11     | ENSG00000181991.15 | 5.380721496 | 5.286131706 | 4.642058057 |
| B4GALT3    | ENSG00000158850.14 | 6.245960826 | 6.262634451 | 5.51328555  |
| TJP1       | ENSG00000104067.16 | 5.244542946 | 5.040157574 | 5.694389257 |
| IRGQ       | ENSG00000167378.8  | 5.043643547 | 4.414218642 | 5.164687467 |
| LMBR1      | ENSG00000105983.20 | 4.67864515  | 6.225516316 | 6.457530405 |
| CNOT4      | ENSG00000080802.18 | 4.475278396 | 4.839993063 | 5.033535949 |
| KIDINS220  | ENSG00000134313.15 | 5.03384     | 5.524495263 | 5.358983668 |
| EXOSC7     | ENSG00000075914.12 | 5.64083629  | 5.597477207 | 4.415951418 |
| NDUFA9     | ENSG00000139180.10 | 4.644398803 | 4.493680841 | 6.644971919 |
| DIP2A      | ENSG00000160305.17 | 4.449180958 | 4.728795552 | 5.079916597 |
| LIG1       | ENSG00000105486.13 | 5.201066237 | 4.661980984 | 5.436674521 |
| EMC8       | ENSG00000131148.8  | 5.77534729  | 5.087901683 | 4.944499654 |
| MIPEP      | ENSG00000027001.9  | 5.177888112 | 4.567475157 | 4.754921388 |
| RBM25      | ENSG00000119707.13 | 5.916769342 | 5.182372557 | 4.652991265 |
| UBAP2      | ENSG00000137073.21 | 5.128871109 | 4.591624115 | 4.659937368 |
| ANKRD13D   | ENSG00000172932.14 | 4.83312698  | 5.381692941 | 4.862159797 |
| LRRC41     | ENSG00000132128.16 | 5.625481231 | 5.111155899 | 4.639140298 |
| MED21      | ENSG00000152944.8  | 5.06186621  | 5.331053748 | 5.904183852 |
| OGFOD3     | ENSG00000181396.12 | 4.504219799 | 4.501445429 | 5.535586949 |
| SLC35F2    | ENSG00000110660.14 | 5.392769146 | 4.682444351 | 5.837604836 |
| CTDSP1     | ENSG00000144579.7  | 5.441903006 | 6.324381229 | 5.772381457 |
| SRA1       | ENSG00000213523.10 | 5.991689598 | 4.521272269 | 5.390689949 |
| ELOA       | ENSG00000011007.12 | 6.280534895 | 5.462216316 | 4.405877596 |
| ETV3       | ENSG00000117036.11 | 5.50848359  | 6.516404389 | 4.425527284 |
| ADNP       | ENSG00000101126.15 | 5.557109996 | 5.891675437 | 4.573812651 |
| PDCD2      | ENSG00000071994.10 | 5.987080587 | 4.935594755 | 4.773588652 |
| DHFR       | ENSG00000228716.6  | 6.232546258 | 4.634369755 | 5.468140883 |
| C1orf174   | ENSG00000198912.10 | 4.980489376 | 4.826662504 | 4.43058023  |
| OTUD6B-AS1 | ENSG00000253738.1  | 4.753902193 | 4.453134396 | 5.349291966 |
| THOP1      | ENSG00000172009.14 | 5.259078591 | 5.874347994 | 4.488837858 |
| YPEL5      | ENSG00000119801.12 | 4.980514289 | 5.01123447  | 5.244662311 |
| MEF2A      | ENSG00000068305.17 | 4.443615042 | 4.491059519 | 5.852872147 |
| EFR3A      | ENSG00000132294.14 | 4.849260579 | 4.707027809 | 4.858072596 |
| NUDT3      | ENSG00000272325.1  | 4.662874637 | 4.790654603 | 5.154241035 |
| POGZ       | ENSG00000143442.21 | 5.603162414 | 5.240689709 | 4.747821295 |
| YTHDF2     | ENSG00000198492.15 | 5.163370576 | 5.125717383 | 5.603300184 |
| RPF2       | ENSG00000197498.12 | 5.831362403 | 5.109683463 | 4.893880116 |
| SNRPD1     | ENSG00000167088.10 | 5.712012919 | 5.194272068 | 4.433914682 |
| CLDN12     | ENSG00000157224.15 | 5.282478119 | 6.947558008 | 6.299088998 |
| VPS45      | ENSG00000136631.12 | 5.66917959  | 5.03247825  | 4.597268369 |

|          |                    |             |             |             |
|----------|--------------------|-------------|-------------|-------------|
| AP1AR    | ENSG00000138660.11 | 4.862635607 | 4.855468849 | 4.569480555 |
| FAM168A  | ENSG00000054965.10 | 5.50235609  | 4.904208273 | 5.933036813 |
| CIR1     | ENSG00000138433.15 | 5.176813104 | 5.802241744 | 5.423676979 |
| RIOK3    | ENSG00000101782.14 | 5.344262196 | 5.438456172 | 4.971113049 |
| OSBPL2   | ENSG00000130703.15 | 4.582118277 | 5.004656403 | 5.530225358 |
| PRR7     | ENSG00000131188.11 | 5.656894871 | 5.355961607 | 4.804450857 |
| COIL     | ENSG00000121058.4  | 4.859096718 | 4.910235203 | 5.302557131 |
| PRAF2    | ENSG00000243279.3  | 6.40874726  | 5.329891464 | 4.458957065 |
| AHCTF1   | ENSG00000153207.14 | 6.910713663 | 4.556741724 | 5.002632289 |
| DIP2B    | ENSG00000066084.12 | 5.42551898  | 5.961603245 | 5.433769651 |
| PSMC3IP  | ENSG00000131470.14 | 5.657178774 | 4.604621948 | 4.413338253 |
| TIPIN    | ENSG00000075131.9  | 5.287752085 | 4.588456873 | 4.641550954 |
| THRA     | ENSG00000126351.12 | 4.59968544  | 5.146013294 | 5.089723614 |
| MBD2     | ENSG00000134046.11 | 4.778742637 | 5.182211507 | 4.620894797 |
| SAV1     | ENSG00000151748.14 | 4.975229293 | 4.689648919 | 5.170053722 |
| FBXO38   | ENSG00000145868.16 | 5.289384722 | 4.400561782 | 4.994831659 |
| NEAT1    | ENSG00000245532.7  | 5.763523094 | 7.337521643 | 7.555244078 |
| TRIM24   | ENSG00000122779.17 | 5.054653417 | 4.399122756 | 5.402960606 |
| PIK3R4   | ENSG00000196455.7  | 5.567352665 | 5.435451631 | 4.439351728 |
| POP4     | ENSG00000105171.9  | 5.49904301  | 5.664179723 | 5.231539937 |
| TMEM245  | ENSG00000106771.12 | 5.24801513  | 6.225594681 | 4.416820326 |
| MREG     | ENSG00000118242.15 | 4.396219153 | 8.167018216 | 7.36524356  |
| ZNF770   | ENSG00000198146.4  | 5.520209106 | 5.105273589 | 5.599716788 |
| PFN2     | ENSG00000070087.13 | 6.274477265 | 7.121511751 | 7.905604115 |
| RARA     | ENSG00000131759.17 | 5.505214522 | 5.554618673 | 6.209129055 |
| CEP70    | ENSG00000114107.8  | 4.742402925 | 4.586923965 | 5.315168147 |
| CHAF1A   | ENSG00000167670.15 | 6.280126223 | 5.63823112  | 4.559842674 |
| PITPNA   | ENSG00000174238.14 | 6.335717608 | 5.453163059 | 5.241788699 |
| FN3KRP   | ENSG00000141560.14 | 4.414956368 | 4.911157406 | 4.596637724 |
| TBC1D15  | ENSG00000121749.15 | 5.905183688 | 5.459835468 | 4.538909062 |
| ZNF697   | ENSG00000143067.4  | 4.916574602 | 5.65621173  | 6.810328858 |
| ERAP1    | ENSG00000164307.12 | 5.600839001 | 4.48194641  | 5.713119837 |
| ANKFY1   | ENSG00000185722.16 | 5.165325619 | 4.600269819 | 4.496155488 |
| CHORDC1  | ENSG00000110172.11 | 5.680018575 | 4.718593472 | 4.482621654 |
| MAIP1    | ENSG00000162972.10 | 4.539197526 | 5.039651592 | 4.652140635 |
| PNPO     | ENSG00000108439.10 | 5.510440415 | 5.623204971 | 5.722994661 |
| RIPK1    | ENSG00000137275.13 | 4.472376662 | 4.698031593 | 4.802228215 |
| TGS1     | ENSG00000137574.10 | 5.560568836 | 4.488847682 | 4.460089915 |
| TBL2     | ENSG00000106638.15 | 4.88899745  | 5.964728914 | 4.583964543 |
| C1orf198 | ENSG00000119280.16 | 5.189997973 | 4.427898704 | 4.394159258 |
| KDM3A    | ENSG00000115548.16 | 4.585388172 | 5.012615857 | 4.891503043 |
| PMM2     | ENSG00000140650.11 | 6.471008574 | 6.184262075 | 4.931965034 |
| GOLGA3   | ENSG00000090615.14 | 5.662116653 | 5.901678417 | 4.466070805 |
| MSRB1    | ENSG00000198736.11 | 5.244874435 | 4.797412224 | 4.78584988  |
| POLDIP3  | ENSG00000100227.17 | 5.587816462 | 4.812996306 | 5.051668248 |
| FAM98B   | ENSG00000171262.11 | 5.825424021 | 5.010580113 | 4.752227251 |

|         |                    |             |             |             |
|---------|--------------------|-------------|-------------|-------------|
| TCEAL4  | ENSG00000133142.17 | 5.126733611 | 5.966147954 | 5.372064814 |
| MRM2    | ENSG00000122687.17 | 5.540300157 | 5.105158358 | 4.593477141 |
| UIMC1   | ENSG00000087206.16 | 5.308921567 | 4.662733623 | 4.716842527 |
| WDR13   | ENSG00000101940.17 | 5.59563304  | 5.186196123 | 5.563543957 |
| TOMM40L | ENSG00000158882.14 | 4.989810152 | 5.127746136 | 4.74666638  |
| TMEM97  | ENSG00000109084.13 | 5.26461208  | 4.787692345 | 4.939993742 |
| GLOD4   | ENSG00000167699.13 | 5.051883242 | 4.611077995 | 5.269587395 |
| EIF2B3  | ENSG00000070785.16 | 5.646804731 | 4.807375192 | 4.420884648 |
| TERF2   | ENSG00000132604.10 | 5.323626582 | 4.444868966 | 4.9367812   |
| RNF187  | ENSG00000168159.11 | 5.50994704  | 4.480714053 | 5.634512425 |
| IKBKB   | ENSG00000104365.13 | 4.476794529 | 5.111681715 | 5.495501863 |
| ARPC5   | ENSG00000162704.15 | 7.021736627 | 5.943435123 | 5.725380036 |
| ERLIN2  | ENSG00000147475.14 | 4.395171026 | 4.969459964 | 4.737507217 |
| ARL2BP  | ENSG00000102931.7  | 5.56338508  | 4.785440819 | 5.487898849 |
| TMEM201 | ENSG00000188807.12 | 5.382964864 | 5.261267061 | 5.683386911 |
| CREM    | ENSG00000095794.19 | 5.143126006 | 6.324309021 | 4.703244117 |
| CENPX   | ENSG00000169689.14 | 4.948252734 | 4.751152931 | 4.829214633 |
| MAPRE2  | ENSG00000166974.12 | 5.123055502 | 5.474741959 | 4.934283645 |
| SLC4A7  | ENSG00000033867.16 | 5.651509333 | 5.12056447  | 4.667740073 |
| ABHD16A | ENSG00000204427.11 | 4.630197384 | 5.350769663 | 5.21143257  |
| PTS     | ENSG00000150787.7  | 6.295702523 | 5.318706458 | 4.385415369 |
| TMEM5   | ENSG00000118600.11 | 5.371071739 | 5.148747666 | 5.32101779  |
| JMJD8   | ENSG00000161999.11 | 6.56419452  | 4.589640449 | 5.100612495 |
| VCL     | ENSG00000035403.17 | 5.348407369 | 5.268765307 | 4.566806399 |
| RSF1    | ENSG00000048649.13 | 4.64290513  | 4.604142387 | 4.607919944 |
| DLEU1_1 | ENSG00000276089.1  | 5.513705009 | 4.525448156 | 5.906008626 |
| CHD2    | ENSG00000173575.20 | 4.954568431 | 5.218440378 | 5.94522185  |
| PHKB    | ENSG00000102893.15 | 4.899386467 | 4.594407615 | 5.669182473 |
| ZNF787  | ENSG00000142409.5  | 5.532185313 | 4.438291    | 6.140544708 |
| DDB2    | ENSG00000134574.11 | 5.574433802 | 5.99643898  | 6.272063121 |
| SYVN1   | ENSG00000162298.18 | 5.525480347 | 5.652053704 | 5.911877498 |
| NCOA5   | ENSG00000124160.11 | 5.929294546 | 4.483609898 | 4.939282465 |
| TMEM9   | ENSG00000116857.16 | 6.148270622 | 6.149311248 | 4.547000443 |
| CD99L2  | ENSG00000102181.20 | 4.869525807 | 5.518520209 | 4.414571925 |
| RNF34   | ENSG00000170633.16 | 5.647725115 | 5.187132924 | 5.725919851 |
| MRPS17  | ENSG00000239789.5  | 4.960261076 | 5.342495892 | 4.438481104 |
| CISD3   | ENSG00000277972.1  | 5.376376873 | 5.205257056 | 4.665704762 |
| KDM5C   | ENSG00000126012.11 | 6.561251447 | 6.201910014 | 6.306600928 |
| ZW10    | ENSG00000086827.8  | 5.792335031 | 4.575999288 | 4.414795599 |
| EXTL2   | ENSG00000162694.13 | 4.810178849 | 4.848960472 | 4.646478481 |
| IDH2    | ENSG00000182054.9  | 4.898789017 | 4.585826737 | 4.503445211 |
| ANAPC1  | ENSG00000153107.11 | 4.484396145 | 5.117730202 | 4.447755413 |
| DPH1    | ENSG00000108963.17 | 5.126765041 | 4.520417661 | 5.224757568 |
| HSBP1   | ENSG00000230989.6  | 5.978849009 | 4.531203818 | 4.621714993 |
| FAM45A  | ENSG00000119979.16 | 5.018152808 | 5.077293479 | 4.693450016 |
| DPH3    | ENSG00000154813.9  | 4.858248833 | 5.177132426 | 4.692917834 |

|          |                    |             |             |             |
|----------|--------------------|-------------|-------------|-------------|
| FLCN     | ENSG00000154803.12 | 4.670406856 | 4.415417812 | 5.759764673 |
| SS18L1   | ENSG00000184402.14 | 4.408407036 | 4.724165023 | 5.509235706 |
| SETDB1   | ENSG00000143379.12 | 6.019356366 | 5.140570606 | 4.819859148 |
| NARS2    | ENSG00000137513.9  | 4.790544277 | 5.549363006 | 5.278542339 |
| XYLT2    | ENSG00000015532.9  | 4.918310087 | 5.761131973 | 5.20214772  |
| CHMP2B   | ENSG00000083937.8  | 5.48369761  | 5.657687328 | 4.947579807 |
| SAMD1    | ENSG00000141858.11 | 7.007780927 | 5.11240496  | 4.399955367 |
| HSPG2    | ENSG00000142798.17 | 4.5021971   | 5.586508984 | 4.675719269 |
| PIGK     | ENSG00000142892.14 | 4.915437069 | 5.19739676  | 4.466589522 |
| SERTAD2  | ENSG00000179833.4  | 5.363474002 | 5.442055337 | 5.437297208 |
| BCL2L12  | ENSG00000126453.9  | 5.240730817 | 5.147432208 | 4.409169372 |
| UGDH     | ENSG00000109814.11 | 5.414646398 | 6.146988333 | 6.112287102 |
| DHX33    | ENSG00000005100.12 | 5.550438337 | 4.698206673 | 6.28338002  |
| TJAP1    | ENSG00000137221.14 | 4.996128982 | 5.112313006 | 5.229881093 |
| TUBB3    | ENSG00000258947.6  | 7.289187428 | 8.893408004 | 4.898400991 |
| TAB3     | ENSG00000157625.15 | 5.261445319 | 4.429226855 | 5.847334962 |
| ZDHHC9   | ENSG00000188706.12 | 4.46429244  | 5.341788482 | 5.251971577 |
| MAK16    | ENSG00000198042.10 | 5.88057687  | 4.699813375 | 4.406821192 |
| CDC6     | ENSG00000094804.9  | 6.204633606 | 5.870273057 | 4.420155411 |
| RNF123   | ENSG00000164068.15 | 5.497392805 | 5.420198839 | 4.705453836 |
| CASP4    | ENSG00000196954.13 | 5.899821958 | 4.376814314 | 6.897574033 |
| PKN2     | ENSG00000065243.19 | 4.938182576 | 4.401365819 | 4.752945753 |
| MRPS31   | ENSG00000102738.7  | 5.885418883 | 4.590290049 | 4.939612852 |
| CMTM3    | ENSG00000140931.19 | 5.349805091 | 5.486344221 | 6.515500188 |
| PPME1    | ENSG00000214517.9  | 5.869863996 | 5.73020185  | 5.080093478 |
| PCF11    | ENSG00000165494.11 | 4.558489161 | 4.733774264 | 5.375613907 |
| SPRYD3   | ENSG00000167778.8  | 4.732135128 | 5.103256397 | 4.898360726 |
| STAT5B   | ENSG00000173757.9  | 4.603361593 | 5.349912017 | 5.636903578 |
| ITPRIPL2 | ENSG00000205730.6  | 5.289376054 | 4.344043845 | 4.706887303 |
| RBM19    | ENSG00000122965.10 | 5.117828057 | 5.323848806 | 4.382283992 |
| LBR      | ENSG00000143815.14 | 6.28639242  | 4.403568725 | 4.346181966 |
| AARS2    | ENSG00000124608.4  | 4.907686837 | 5.050485226 | 6.129637536 |
| CAMTA2   | ENSG00000108509.20 | 6.785764824 | 4.467353325 | 7.103926898 |
| TAB2     | ENSG00000055208.18 | 5.230243514 | 4.985435251 | 4.791985052 |
| GAA      | ENSG00000171298.12 | 5.686670779 | 6.08936204  | 4.972153765 |
| TSC22D1  | ENSG00000102804.14 | 6.838617317 | 5.437553467 | 6.827181956 |
| C6orf47  | ENSG00000204439.3  | 4.444551316 | 4.713023379 | 4.946473014 |
| TARBP2   | ENSG00000139546.10 | 5.380963171 | 5.040775489 | 4.416821468 |
| TCAF1    | ENSG00000198420.9  | 5.136379082 | 5.486515005 | 4.408171984 |
| UQCC2    | ENSG00000137288.9  | 4.867595249 | 4.605535059 | 4.578204328 |
| TNK2     | ENSG00000061938.17 | 4.493437261 | 5.388572774 | 4.793837476 |
| NEMP1    | ENSG00000166881.9  | 5.184560891 | 4.983654    | 4.336592461 |
| MIEN1    | ENSG00000141741.11 | 5.119936318 | 5.2746788   | 5.930595439 |
| AAGAB    | ENSG00000103591.12 | 5.777018141 | 5.803353541 | 5.82264518  |
| GATD1    | ENSG00000177225.16 | 4.363658832 | 5.27206389  | 5.163612848 |
| NIP7     | ENSG00000132603.13 | 6.103412845 | 5.171538384 | 5.540371079 |

|          |                    |             |             |             |
|----------|--------------------|-------------|-------------|-------------|
| MPC1     | ENSG00000060762.18 | 5.633672618 | 4.568198707 | 5.581147009 |
| KNOP1    | ENSG00000103550.13 | 5.574888877 | 5.043208353 | 5.178145284 |
| FAM84B   | ENSG00000168672.3  | 8.203799115 | 4.44193718  | 7.514073599 |
| CARHSP1  | ENSG00000153048.10 | 6.323831844 | 5.076172803 | 4.40481349  |
| ADI1     | ENSG00000182551.13 | 6.99682186  | 5.935065015 | 4.822684785 |
| SENP5    | ENSG00000119231.10 | 4.433113552 | 4.890669732 | 4.499913794 |
| DBR1     | ENSG00000138231.12 | 5.080474884 | 4.809821677 | 4.347321472 |
| EDC3     | ENSG00000179151.11 | 5.504882956 | 5.848152635 | 5.063255426 |
| INTS12   | ENSG00000138785.14 | 4.794726347 | 4.543043195 | 5.208429323 |
| POLR3D   | ENSG00000168495.12 | 5.467257872 | 4.459234564 | 4.642553954 |
| PMF1     | ENSG00000160783.19 | 5.827232827 | 5.273884525 | 4.328457216 |
| SURF2    | ENSG00000148291.9  | 6.537245709 | 5.818978364 | 4.384761814 |
| PRKRIP1  | ENSG00000128563.13 | 4.762249735 | 5.202366203 | 4.526309603 |
| ABCD1    | ENSG00000101986.11 | 4.67990467  | 6.842462251 | 5.788020754 |
| DAAM2    | ENSG00000146122.16 | 5.124177008 | 5.750145595 | 5.904228132 |
| MARCH7   | ENSG00000136536.14 | 4.67250578  | 5.326450643 | 5.461496401 |
| TMEM185B | ENSG00000226479.3  | 4.407616332 | 5.318497577 | 5.098344733 |
| TMEM70   | ENSG00000175606.10 | 5.374099597 | 4.516633537 | 5.060865966 |
| NUS1     | ENSG00000153989.7  | 5.247561633 | 4.912513533 | 4.375344175 |
| MFSD14A  | ENSG00000156875.13 | 5.66116217  | 5.425540034 | 5.37783601  |
| DUSP11   | ENSG00000144048.10 | 5.130917325 | 5.283285245 | 4.399662829 |
| PRADC1   | ENSG00000135617.3  | 5.093911395 | 4.55256803  | 4.354196658 |
| SUDS3    | ENSG00000111707.11 | 5.067845801 | 4.92140057  | 5.4254124   |
| SPHK1    | ENSG00000176170.13 | 4.387635862 | 7.01404144  | 4.805517944 |
| SUMF1    | ENSG00000144455.13 | 4.318717909 | 5.395554537 | 4.689369961 |
| XPO4     | ENSG00000132953.16 | 4.685777451 | 4.7157465   | 4.600451906 |
| TOB2     | ENSG00000183864.4  | 5.273875278 | 5.400375351 | 4.341001184 |
| TMEM94   | ENSG00000177728.16 | 4.872577572 | 5.339339114 | 5.92329969  |
| FAM13B   | ENSG00000031003.10 | 4.372685645 | 4.833126736 | 4.389602146 |
| ADO      | ENSG00000181915.4  | 5.017387735 | 5.178098414 | 4.875005756 |
| UAP1L1   | ENSG00000197355.10 | 4.474916742 | 6.426212859 | 5.569355034 |
| RBPMS    | ENSG00000157110.15 | 4.435198304 | 4.786794378 | 5.062483566 |
| INTS6    | ENSG00000102786.14 | 4.805872645 | 4.844580903 | 4.563129307 |
| HDAC6    | ENSG00000094631.18 | 4.407923726 | 4.712584961 | 5.178771513 |
| TPMT     | ENSG00000137364.4  | 4.389046654 | 5.109941026 | 5.15195328  |
| YAE1D1   | ENSG00000241127.7  | 5.596185731 | 5.538315584 | 4.933822504 |
| ATF6     | ENSG00000118217.5  | 5.146042277 | 5.591450845 | 5.193211113 |
| PLEKHO2  | ENSG00000241839.9  | 4.387611882 | 6.124927593 | 6.412098578 |
| SEPHS1   | ENSG00000086475.14 | 5.694644677 | 5.069961774 | 4.603860359 |
| DDHD2    | ENSG00000085788.13 | 4.722112698 | 4.666060703 | 5.371509858 |
| LUZP1    | ENSG00000169641.13 | 5.016551949 | 4.932504725 | 4.715842136 |
| RBM33    | ENSG00000184863.10 | 4.793488989 | 4.689262903 | 5.080246878 |
| GAS8     | ENSG00000141013.16 | 4.337970559 | 6.008290262 | 4.608573723 |
| FMNL2    | ENSG00000157827.19 | 5.712349307 | 6.311388907 | 5.841822621 |
| KIF13A   | ENSG00000137177.19 | 4.834750328 | 4.812980219 | 4.667203199 |
| AKAP11   | ENSG00000023516.8  | 5.250129516 | 5.134875021 | 4.831346466 |

|          |                    |             |             |             |
|----------|--------------------|-------------|-------------|-------------|
| SEPT8    | ENSG00000164402.13 | 5.163981708 | 4.482254304 | 5.295336605 |
| SYMPK    | ENSG00000125755.18 | 6.57297772  | 5.685950539 | 5.322226168 |
| TUBGCP3  | ENSG00000126216.13 | 6.043071886 | 4.418631614 | 4.365501958 |
| STAU2    | ENSG00000040341.17 | 4.932545371 | 5.412559494 | 6.166252641 |
| ZNF512B  | ENSG00000196700.8  | 5.15363166  | 4.363018226 | 4.794005362 |
| MAST2    | ENSG00000086015.20 | 5.12039006  | 5.133486867 | 5.524500676 |
| OXSR1    | ENSG00000172939.8  | 5.985155063 | 6.014364055 | 4.348882676 |
| ZNHIT3   | ENSG00000273611.4  | 5.507311655 | 5.542385955 | 5.659317416 |
| TTC4     | ENSG00000243725.6  | 4.957779876 | 4.85875572  | 4.409863329 |
| SLC30A9  | ENSG00000014824.13 | 5.665680106 | 4.432286661 | 6.402807889 |
| TNFAIP1  | ENSG00000109079.9  | 5.809438629 | 5.584453031 | 5.106148377 |
| QSER1    | ENSG00000060749.14 | 5.487155732 | 5.282092868 | 5.21376812  |
| ATF1     | ENSG00000123268.8  | 5.489593721 | 4.784303968 | 4.523134819 |
| NFATC2IP | ENSG00000176953.12 | 5.250367728 | 4.605170256 | 4.479089777 |
| TRIM33   | ENSG00000197323.11 | 5.771413813 | 5.66839557  | 4.368588648 |
| KLF16    | ENSG00000129911.8  | 4.424557118 | 5.483760195 | 4.819030949 |
| SLC35D2  | ENSG00000130958.11 | 4.955947031 | 5.592328241 | 5.00214129  |
| HJURP    | ENSG00000123485.11 | 5.860437787 | 5.380256589 | 4.453504075 |
| SNAP23   | ENSG00000092531.9  | 4.614949054 | 5.634716643 | 4.914746735 |
| USP24    | ENSG00000162402.13 | 5.332777644 | 4.863062422 | 4.381916115 |
| AGGF1    | ENSG00000164252.12 | 5.22525546  | 4.674032431 | 4.37913982  |
| RGS19    | ENSG00000171700.13 | 4.683766726 | 4.894799487 | 4.604996611 |
| SOAT1    | ENSG00000057252.12 | 5.621989898 | 4.655050895 | 7.049528719 |
| FBXO32   | ENSG00000156804.7  | 4.443821866 | 7.046033456 | 6.502532223 |
| ATG4D    | ENSG00000130734.9  | 5.315497957 | 6.196690838 | 5.541363858 |
| VPS33A   | ENSG00000139719.9  | 5.308095512 | 5.079948734 | 4.597909612 |
| ZCCHC9   | ENSG00000131732.11 | 5.41765924  | 5.110246807 | 4.456720325 |
| RBM27    | ENSG00000091009.7  | 5.429648278 | 4.35347851  | 4.830560804 |
| SEPT11   | ENSG00000138758.11 | 6.465177391 | 6.35325455  | 6.827378018 |
| WASHC4   | ENSG00000136051.13 | 5.677669688 | 5.50549422  | 4.328281075 |
| DPM3     | ENSG00000179085.7  | 6.22801523  | 5.877278681 | 4.404148789 |
| POLB     | ENSG00000070501.11 | 5.209780962 | 5.776517602 | 5.94382527  |
| MMD      | ENSG00000108960.7  | 4.397684653 | 5.113148409 | 4.412704114 |
| AASS     | ENSG00000008311.14 | 4.769978405 | 5.362129637 | 4.627493363 |
| TRIM56   | ENSG00000169871.12 | 4.298402556 | 4.624483051 | 4.761321431 |
| SELENOK  | ENSG00000113811.10 | 5.691037942 | 5.572713269 | 4.67880922  |
| RAI1     | ENSG00000108557.18 | 5.839387679 | 5.576077359 | 5.650726542 |
| SPATS2   | ENSG00000123352.17 | 4.697588763 | 5.438502102 | 4.714891108 |
| IL17RC   | ENSG00000163702.18 | 4.64033072  | 4.719166052 | 4.898970076 |
| METTL13  | ENSG00000010165.19 | 6.504070486 | 5.398543751 | 4.625887998 |
| SFXN4    | ENSG00000183605.16 | 5.752766366 | 5.047474001 | 6.155447186 |
| AKAP8    | ENSG00000105127.8  | 5.357367926 | 4.812097668 | 4.515135626 |
| TOP3A    | ENSG00000177302.14 | 6.634383182 | 4.378903386 | 4.860497206 |
| SLC35E1  | ENSG00000127526.14 | 5.474720973 | 6.038293043 | 4.642322015 |
| AKIP1    | ENSG00000166452.11 | 4.564622366 | 5.16502864  | 5.382136778 |
| SMCHD1   | ENSG00000101596.14 | 4.725525726 | 5.086752813 | 4.856434098 |

|          |                    |             |             |             |
|----------|--------------------|-------------|-------------|-------------|
| BACH1    | ENSG00000156273.15 | 4.74847943  | 4.747100869 | 5.611482132 |
| EAF1     | ENSG00000144597.13 | 5.455965461 | 5.437037021 | 4.757219134 |
| RHBDD3   | ENSG00000100263.13 | 4.499620125 | 5.103705105 | 4.890826174 |
| PPT2     | ENSG00000221988.12 | 5.729836966 | 5.605914376 | 4.608403079 |
| NDUFAF6  | ENSG00000156170.12 | 5.002348795 | 4.666948257 | 4.327816633 |
| COQ5     | ENSG00000110871.14 | 5.379882571 | 4.937086596 | 6.497071385 |
| NPAT     | ENSG00000149308.16 | 4.298333755 | 4.682350924 | 4.723467824 |
| DMXL1    | ENSG00000172869.14 | 4.638701034 | 5.101352625 | 5.383057582 |
| MUS81    | ENSG00000172732.11 | 5.300024823 | 4.812150476 | 5.411863951 |
| NUP43    | ENSG00000120253.13 | 5.852133279 | 4.449026138 | 4.299601315 |
| TMEM60   | ENSG00000135211.5  | 4.358412902 | 5.82038494  | 4.96031746  |
| USE1     | ENSG00000053501.12 | 6.768887821 | 5.556739717 | 4.539162466 |
| NUP54    | ENSG00000138750.14 | 5.20418577  | 5.319499441 | 4.364823134 |
| ARSB     | ENSG00000113273.15 | 4.412276334 | 4.40929787  | 5.968983676 |
| EVI5     | ENSG00000067208.14 | 4.339304888 | 4.805528043 | 4.630456052 |
| NELFA    | ENSG00000185049.14 | 5.476817381 | 4.475295723 | 6.614002863 |
| PPP2R3C  | ENSG00000092020.10 | 4.538025566 | 4.399587856 | 5.218697086 |
| AFMID    | ENSG00000183077.15 | 4.615093443 | 5.386833258 | 5.061728815 |
| UBE2N    | ENSG00000177889.9  | 5.905286509 | 5.330512025 | 4.318749946 |
| ACAA1    | ENSG00000060971.17 | 5.551814517 | 6.55461183  | 4.357889896 |
| RCOR3    | ENSG00000117625.13 | 5.543593515 | 4.349138385 | 4.443334497 |
| OCRL     | ENSG00000122126.15 | 4.62337056  | 5.289438122 | 5.173504128 |
| TNKS2    | ENSG00000107854.5  | 5.537289493 | 5.112087846 | 5.434515378 |
| TEAD4    | ENSG00000197905.8  | 5.645892298 | 4.36131808  | 6.125220022 |
| NUDT19   | ENSG00000213965.3  | 5.116727139 | 4.947189461 | 4.885508176 |
| DDX10    | ENSG00000178105.9  | 5.314259133 | 4.37289731  | 4.972203382 |
| FARP1    | ENSG00000152767.16 | 6.072842045 | 5.81575765  | 6.334791268 |
| GRPEL1   | ENSG00000109519.12 | 5.377694458 | 4.314468011 | 5.927755658 |
| FMC1     | ENSG00000164898.12 | 5.011215696 | 4.456001092 | 4.696561796 |
| OMA1     | ENSG00000162600.11 | 5.497341734 | 4.510229198 | 4.571520028 |
| GTPBP1   | ENSG00000100226.15 | 4.50789     | 5.178663091 | 5.607785421 |
| UBXN8    | ENSG00000104691.14 | 4.853070987 | 5.065697525 | 4.725649865 |
| KDM1B    | ENSG00000165097.13 | 4.71643169  | 4.280982652 | 5.803702581 |
| SPPL3    | ENSG00000157837.15 | 5.118479566 | 5.057253603 | 6.211919836 |
| PRKD2    | ENSG00000105287.12 | 5.683773844 | 5.18325959  | 5.715803054 |
| PLAA     | ENSG00000137055.14 | 7.276355344 | 4.962846534 | 5.196055938 |
| ESF1     | ENSG00000089048.14 | 5.79602545  | 5.996710056 | 4.296561361 |
| ANKZF1   | ENSG00000163516.13 | 4.696055933 | 4.585986264 | 4.833908648 |
| OTUD4    | ENSG00000164164.15 | 5.519420556 | 4.414707033 | 4.708751004 |
| ZNF394   | ENSG00000160908.14 | 4.9904031   | 5.116718445 | 4.439272056 |
| EXOSC2   | ENSG00000130713.15 | 6.438915248 | 5.361337933 | 4.33923174  |
| AURKB    | ENSG00000178999.12 | 6.712160531 | 5.649198791 | 4.512432434 |
| SLC25A22 | ENSG00000177542.10 | 5.860125236 | 5.645162673 | 5.012181891 |
| TMEM256  | ENSG00000205544.3  | 5.543613016 | 5.322993062 | 4.336978373 |
| NSMCE4A  | ENSG00000107672.14 | 6.192670976 | 4.392728415 | 4.607542178 |
| KIF3C    | ENSG00000084731.14 | 4.937400607 | 5.826336945 | 5.316403132 |

|          |                    |             |             |             |
|----------|--------------------|-------------|-------------|-------------|
| GAPVD1   | ENSG00000165219.21 | 5.733189708 | 5.708143589 | 4.518438192 |
| CDC20    | ENSG00000117399.13 | 8.087366662 | 6.27766614  | 4.404469298 |
| TXNDC17  | ENSG00000129235.10 | 6.245518082 | 4.539436121 | 4.447224633 |
| TAF5L    | ENSG00000135801.9  | 5.663743679 | 4.327418818 | 4.412342096 |
| SCAF4    | ENSG00000156304.14 | 5.215722141 | 4.307927982 | 4.961846168 |
| NARF     | ENSG00000141562.17 | 4.855020721 | 5.493209563 | 6.218743962 |
| SARS2    | ENSG00000104835.14 | 5.609734233 | 4.754490772 | 4.6612318   |
| MINPP1   | ENSG00000107789.15 | 6.3816016   | 5.315384161 | 4.692067811 |
| REXO1    | ENSG00000079313.13 | 4.649218928 | 5.014613379 | 4.90686083  |
| MPHOSPH9 | ENSG00000051825.14 | 5.093204829 | 4.350099607 | 5.212028523 |
| BRAT1    | ENSG00000106009.15 | 5.118645932 | 6.013015749 | 4.380009024 |
| MTFP1    | ENSG00000242114.5  | 5.14380234  | 4.644836291 | 5.420789234 |
| DIS3L    | ENSG00000166938.12 | 4.683334494 | 4.361617291 | 4.40599599  |
| CCDC12   | ENSG00000160799.11 | 5.596081448 | 5.353941592 | 4.335679249 |
| TCF19    | ENSG00000137310.11 | 5.469441277 | 4.305770373 | 4.978318554 |
| REXO4    | ENSG00000148300.11 | 5.766397817 | 5.646344563 | 4.326501319 |
| RECQL5   | ENSG00000108469.14 | 4.873731262 | 5.264715838 | 5.096133563 |
| BMS1     | ENSG00000165733.7  | 5.524093212 | 4.569484598 | 4.312850749 |
| USP21    | ENSG00000143258.15 | 5.581461261 | 5.284308942 | 4.593479604 |
| CEP104   | ENSG00000116198.12 | 5.174912135 | 4.948330115 | 5.358755563 |
| APTX     | ENSG00000137074.18 | 5.368076669 | 4.925386736 | 4.298203915 |
| RAB22A   | ENSG00000124209.3  | 4.294592189 | 4.291750967 | 5.526223882 |
| TMEM181  | ENSG00000146433.8  | 5.640551875 | 4.775322473 | 4.916398849 |
| TIMELESS | ENSG00000111602.11 | 5.599251429 | 4.388285632 | 4.587946957 |
| DIS3     | ENSG00000083520.14 | 5.697675309 | 4.988092163 | 4.609126171 |
| UNG      | ENSG00000076248.10 | 5.976605246 | 5.388229125 | 4.397265784 |
| CXorf56  | ENSG00000018610.13 | 5.341229128 | 4.999344295 | 5.003521874 |
| PPP6C    | ENSG00000119414.11 | 5.774607968 | 6.381676129 | 4.939144483 |
| LIX1L    | ENSG00000271601.3  | 6.040879074 | 5.615889849 | 4.368554347 |
| NSMF     | ENSG00000165802.22 | 5.594835669 | 6.161130867 | 7.040742879 |
| CRAT     | ENSG00000095321.16 | 4.796669264 | 5.131386026 | 4.369938781 |
| SLC25A24 | ENSG00000085491.15 | 5.304369908 | 4.790667702 | 4.289810513 |
| WAPL     | ENSG00000062650.18 | 5.700451914 | 4.967912006 | 4.965439472 |
| THAP12   | ENSG00000137492.7  | 5.766072885 | 4.444368692 | 5.153748057 |
| ZBTB38   | ENSG00000177311.11 | 7.46073426  | 7.403127964 | 5.511231751 |
| NCBP1    | ENSG00000136937.12 | 6.322401549 | 6.128183919 | 4.319463602 |
| GMPR2    | ENSG00000100938.17 | 5.132221717 | 4.432722948 | 4.623547691 |
| PARP9    | ENSG00000138496.16 | 4.359106398 | 4.390338086 | 5.735281424 |
| AGA      | ENSG00000038002.8  | 5.577830209 | 4.670173686 | 4.295213973 |
| ERLIN1   | ENSG00000107566.13 | 5.202520169 | 4.726942407 | 4.430700404 |
| TTL      | ENSG00000114999.7  | 4.569254227 | 5.228871621 | 4.308744193 |
| TSPYL1   | ENSG00000189241.6  | 5.579911011 | 5.388423908 | 5.312362832 |
| LSM3     | ENSG00000170860.3  | 5.307348318 | 4.9694168   | 4.354190525 |
| C1D      | ENSG00000197223.11 | 5.076356221 | 4.518308644 | 4.370765771 |
| ICK      | ENSG00000112144.15 | 4.320210128 | 4.453389322 | 5.117897246 |
| INTS4    | ENSG00000149262.16 | 5.322283581 | 5.15987946  | 5.147943366 |



|          |                    |             |             |             |
|----------|--------------------|-------------|-------------|-------------|
| RSRC1    | ENSG00000174891.12 | 5.691628786 | 5.309000634 | 5.467883305 |
| YEATS4   | ENSG00000127337.6  | 6.16022964  | 4.57630848  | 5.6322118   |
| TPST1    | ENSG00000169902.13 | 4.722135487 | 6.009742897 | 4.330123304 |
| MAN2A2   | ENSG00000196547.14 | 5.008693125 | 5.906352817 | 5.388080286 |
| SLC25A44 | ENSG00000160785.13 | 5.65827974  | 5.054715879 | 4.277627514 |
| POFUT2   | ENSG00000186866.16 | 4.450317232 | 6.350733727 | 5.373979109 |
| SYS1     | ENSG00000204070.9  | 5.436028493 | 4.484201647 | 5.026077233 |
| PFAS     | ENSG00000178921.13 | 6.072977588 | 4.605611472 | 4.298027269 |
| CCPG1    | ENSG00000260916.7  | 4.516067868 | 5.038790155 | 7.028507105 |
| PUS1     | ENSG00000177192.13 | 5.580578919 | 5.073788603 | 5.638814851 |
| GEMIN5   | ENSG00000082516.8  | 5.726833855 | 4.809947924 | 4.623426886 |
| HPF1     | ENSG00000056050.6  | 5.011626861 | 4.474224867 | 4.311767956 |
| C12orf49 | ENSG00000111412.5  | 4.398521494 | 5.617593706 | 4.580727612 |
| IER5     | ENSG00000162783.10 | 4.304629159 | 4.695712397 | 4.860235328 |
| CAD      | ENSG00000084774.13 | 6.301862355 | 6.117781252 | 4.484063111 |
| TRAF2    | ENSG00000127191.17 | 4.784305562 | 5.323332906 | 5.416659385 |
| RP9      | ENSG00000164610.8  | 5.108920645 | 5.330093373 | 4.906296957 |
| RPAP1    | ENSG00000103932.11 | 5.532608753 | 5.422562925 | 4.995028115 |
| SHISA4   | ENSG00000198892.6  | 5.31743754  | 4.976850685 | 4.678481227 |
| EXOC3    | ENSG00000180104.15 | 5.569886961 | 5.862067232 | 6.275518239 |
| RNF19B   | ENSG00000116514.16 | 4.911088613 | 4.934263849 | 5.824278489 |
| GCC1     | ENSG00000179562.2  | 4.633113913 | 5.17375953  | 5.187462142 |
| SLC6A8   | ENSG00000130821.15 | 6.843366801 | 7.507998995 | 7.32707253  |
| PIGQ     | ENSG00000007541.16 | 5.017471618 | 4.821030482 | 4.395682756 |
| ARNT     | ENSG00000143437.20 | 4.934442332 | 5.419584221 | 4.577495614 |
| DRAM2    | ENSG00000156171.14 | 4.262490218 | 4.84607886  | 5.251266574 |
| SLC41A1  | ENSG00000133065.10 | 6.033169626 | 4.290160892 | 5.018250601 |
| CHTF18   | ENSG00000127586.16 | 5.245614149 | 4.494521965 | 4.411248562 |
| AGPAT3   | ENSG00000160216.18 | 4.809743797 | 4.808965087 | 5.344894015 |
| FAM160B2 | ENSG00000158863.21 | 4.37249918  | 4.789111969 | 5.428397776 |
| GATAD2B  | ENSG00000143614.9  | 6.025744047 | 5.39726186  | 4.612842923 |
| EHD4     | ENSG00000103966.10 | 5.511067361 | 4.515242538 | 5.00079111  |
| KLHL17   | ENSG00000187961.13 | 4.567363775 | 5.181696676 | 4.969934504 |
| CEP164   | ENSG00000110274.15 | 5.712493983 | 4.411813313 | 5.328741495 |
| PCOLCE   | ENSG00000106333.12 | 8.369175553 | 4.611382486 | 4.90909788  |
| TRUB1    | ENSG00000165832.5  | 5.373512284 | 4.779309402 | 5.444514282 |
| COMMD8   | ENSG00000169019.10 | 5.439517693 | 4.355812757 | 5.896598515 |
| CHKA     | ENSG00000110721.11 | 4.279391776 | 5.617897506 | 6.884945746 |
| PLAGL2   | ENSG00000126003.6  | 4.344850354 | 4.292102997 | 4.842654154 |
| EPN1     | ENSG00000063245.14 | 7.271674707 | 5.455750782 | 7.092049402 |
| POLD1    | ENSG00000062822.12 | 6.247645686 | 5.641883303 | 4.455838139 |
| MAP3K2   | ENSG00000169967.16 | 4.327658343 | 4.737825073 | 4.663472386 |
| SLC25A17 | ENSG00000100372.14 | 4.787325392 | 5.011866902 | 4.663255398 |
| OGFOD1   | ENSG00000087263.16 | 6.049628294 | 5.097622669 | 5.372789127 |
| ZKSCAN5  | ENSG00000196652.11 | 4.361678416 | 4.750242792 | 4.325866187 |
| NR2C2    | ENSG00000177463.15 | 5.233141627 | 5.077239164 | 5.236455807 |

|          |                    |             |             |             |
|----------|--------------------|-------------|-------------|-------------|
| MOCS2    | ENSG00000164172.18 | 5.790378782 | 4.94261341  | 5.203244713 |
| LAGE3    | ENSG00000196976.7  | 5.085202275 | 5.195983342 | 4.298600406 |
| PABPC1L  | ENSG00000101104.12 | 6.001777039 | 6.15901537  | 7.138257182 |
| STRIP1   | ENSG00000143093.14 | 4.909756521 | 4.619533864 | 4.642281983 |
| BTG1     | ENSG00000133639.4  | 6.441745251 | 5.56977989  | 5.740991315 |
| PCSK7    | ENSG00000160613.12 | 5.422503647 | 4.270877303 | 4.617584388 |
| PARP6    | ENSG00000137817.16 | 4.664073771 | 4.951175487 | 5.22787386  |
| MALSU1   | ENSG00000156928.4  | 4.544430955 | 4.986137007 | 4.335548675 |
| ASCC2    | ENSG00000100325.14 | 5.555043635 | 5.656586125 | 5.664900474 |
| IFFO1    | ENSG00000010295.19 | 4.288877786 | 5.312208372 | 5.321855788 |
| URGCP    | ENSG00000106608.16 | 4.352301039 | 5.215330891 | 4.906873645 |
| MRPL10   | ENSG00000159111.12 | 5.660992811 | 5.095984829 | 5.969551961 |
| AP3M2    | ENSG00000070718.11 | 4.320133081 | 4.899609821 | 5.61755653  |
| DRG2     | ENSG00000108591.9  | 5.934113896 | 4.654480925 | 4.505960998 |
| CYTH1    | ENSG00000108669.16 | 4.307211447 | 5.707811358 | 5.143763684 |
| MYO18A   | ENSG00000196535.15 | 5.37948246  | 5.247052871 | 5.698721849 |
| TIMM8A   | ENSG00000126953.5  | 5.172184452 | 4.940653472 | 4.735312996 |
| LEPROTL1 | ENSG00000104660.17 | 5.208237154 | 5.120751503 | 5.851002084 |
| RABGAP1  | ENSG00000011454.16 | 5.153137534 | 5.819669836 | 4.688487003 |
| NTMT1    | ENSG00000148335.14 | 6.159867863 | 6.427607153 | 4.339767979 |
| STK38    | ENSG00000112079.8  | 4.245158805 | 4.71196726  | 4.839721477 |
| GORASP2  | ENSG00000115806.12 | 4.571929726 | 6.566184987 | 6.556711034 |
| RHNO1    | ENSG00000171792.10 | 5.01099395  | 5.035772649 | 4.791859595 |
| RFC3     | ENSG00000133119.12 | 6.891607378 | 5.592190803 | 4.285070862 |
| TRAPPC10 | ENSG00000160218.12 | 4.502056171 | 4.561094211 | 4.412765912 |
| EPC2     | ENSG00000135999.11 | 4.362320523 | 4.936452268 | 4.868821631 |
| KIRREL1  | ENSG00000183853.17 | 5.834954943 | 6.72767826  | 4.364642063 |
| COQ10B   | ENSG00000115520.8  | 4.513748636 | 5.97521956  | 5.101419686 |
| PNPT1    | ENSG00000138035.14 | 5.888295529 | 5.544835224 | 4.36381641  |
| REEP3    | ENSG00000165476.13 | 4.824527082 | 4.304324202 | 4.992973114 |
| MARK3    | ENSG00000075413.17 | 6.189026687 | 5.980943477 | 4.337122262 |
| PARP14   | ENSG00000173193.13 | 4.243032829 | 4.720703175 | 4.885289229 |
| TRIT1    | ENSG00000043514.15 | 5.25817399  | 4.569770353 | 4.337709616 |
| SLC11A2  | ENSG00000110911.14 | 4.294088491 | 6.479731951 | 6.101842232 |
| SDHAF2   | ENSG00000167985.6  | 5.495597928 | 4.733903481 | 5.125435864 |
| MRPS14   | ENSG00000120333.4  | 4.956618364 | 4.414070929 | 4.786277977 |
| CPTP     | ENSG00000224051.6  | 4.808646108 | 5.611296628 | 5.311916952 |
| GTPBP6   | ENSG00000178605.13 | 5.731397838 | 4.278957527 | 5.486936082 |
| TMED1    | ENSG00000099203.6  | 5.832758489 | 4.694165724 | 4.314032203 |
| NGLY1    | ENSG00000151092.16 | 4.676368932 | 5.009904522 | 4.706531189 |
| PRR14    | ENSG00000156858.11 | 5.225155071 | 4.262628295 | 5.083480691 |
| TMEM11   | ENSG00000178307.9  | 4.880439604 | 4.481333922 | 5.171179851 |
| PCK2     | ENSG00000100889.11 | 5.575106286 | 4.699156442 | 5.349147568 |
| KDM2B    | ENSG00000089094.18 | 5.123726174 | 4.310048652 | 5.325533035 |
| SNX7     | ENSG00000162627.16 | 5.933044679 | 4.308280423 | 5.052700945 |
| NAGK     | ENSG00000124357.12 | 4.551079864 | 4.913931649 | 4.517202934 |

|         |                    |             |             |             |
|---------|--------------------|-------------|-------------|-------------|
| TIMM9   | ENSG00000100575.13 | 4.767815611 | 4.413754329 | 5.167552534 |
| HBS1L   | ENSG00000112339.14 | 5.178299163 | 5.622263074 | 4.457784189 |
| COG1    | ENSG00000166685.11 | 4.747277385 | 5.233716976 | 5.191693186 |
| ADGRA3  | ENSG00000152990.13 | 5.320339423 | 4.736123796 | 6.586881484 |
| NFKBIB  | ENSG00000104825.16 | 5.093446541 | 4.870446873 | 4.834818275 |
| SNX30   | ENSG00000148158.16 | 5.030059332 | 5.877237041 | 5.27678065  |
| FITM2   | ENSG00000197296.5  | 4.230104051 | 4.599461401 | 5.071092212 |
| CTSF    | ENSG00000174080.10 | 5.853500822 | 5.955025065 | 6.585053934 |
| SLC39A9 | ENSG00000029364.11 | 5.350439185 | 4.226486614 | 5.658039333 |
| ZCRB1   | ENSG00000139168.7  | 6.125308896 | 5.106576081 | 4.311697004 |
| SIN3A   | ENSG00000169375.15 | 5.857135791 | 5.428160629 | 4.912149431 |
| NAA35   | ENSG00000135040.15 | 5.797546448 | 5.627726572 | 4.215923545 |
| SLC30A7 | ENSG00000162695.11 | 5.141001508 | 4.633380374 | 4.461720999 |
| MOB4    | ENSG00000115540.14 | 5.167305327 | 5.017788062 | 5.464883721 |
| POLD4   | ENSG00000175482.8  | 5.31107665  | 4.757116892 | 4.690736998 |
| DMXL2   | ENSG00000104093.13 | 4.546974888 | 6.310751228 | 6.521431062 |
| TRMT61B | ENSG00000171103.10 | 4.834715675 | 4.972038845 | 4.385871547 |
| BBS4    | ENSG00000140463.13 | 4.360788348 | 4.443082023 | 4.888763307 |
| RCBTB1  | ENSG00000136144.11 | 4.506020989 | 4.440652445 | 5.111777396 |
| DDX50   | ENSG00000107625.12 | 5.946215249 | 4.669198039 | 5.555965379 |
| GULP1   | ENSG00000144366.15 | 5.315008569 | 4.264275142 | 5.033995503 |
| RAD50   | ENSG00000113522.13 | 4.597624068 | 4.221884826 | 5.14598612  |
| EEF1A2  | ENSG00000101210.10 | 4.545859553 | 5.224726918 | 7.75752566  |
| MORC3   | ENSG00000159256.12 | 4.238549048 | 4.483648765 | 5.569887711 |
| CWC25   | ENSG00000273559.4  | 4.794658804 | 4.332088656 | 4.886765897 |
| VPS36   | ENSG00000136100.12 | 5.080863026 | 4.357808529 | 4.923470329 |
| CBLL1   | ENSG00000105879.11 | 4.391716026 | 5.327898504 | 4.552457909 |
| COMMD2  | ENSG00000114744.8  | 5.008091614 | 5.116254378 | 5.375147023 |
| GRWD1   | ENSG00000105447.12 | 5.825567795 | 4.991912984 | 4.253646498 |
| MKLN1   | ENSG00000128585.17 | 4.954660625 | 5.5580111   | 4.981108446 |
| SCLY    | ENSG00000132330.16 | 4.928740103 | 5.850842075 | 4.408546577 |
| EHBP1L1 | ENSG00000173442.12 | 5.953378332 | 4.879986821 | 5.745205217 |
| NGDN    | ENSG00000129460.15 | 5.666919256 | 4.384928184 | 4.597709155 |
| AMBRA1  | ENSG00000110497.14 | 4.887137739 | 4.903282086 | 5.586789178 |
| NHSL1   | ENSG00000135540.11 | 5.89658907  | 5.092392869 | 5.021549592 |
| DCAF1   | ENSG00000145041.15 | 5.305182666 | 4.907424111 | 4.227934862 |
| CHCHD7  | ENSG00000170791.17 | 5.127058294 | 5.231287318 | 4.462200109 |
| HEATR5B | ENSG00000008869.11 | 4.774403919 | 5.289043155 | 5.000085599 |
| LRRC45  | ENSG00000169683.7  | 4.33657433  | 4.449381688 | 4.884421384 |
| PHF19   | ENSG00000119403.13 | 7.183355106 | 6.021077775 | 4.465344689 |
| HOXC4   | ENSG00000198353.7  | 5.278149462 | 5.029720871 | 4.268205172 |
| ZNF654  | ENSG00000175105.6  | 4.490889531 | 4.870313345 | 4.403857849 |
| USP15   | ENSG00000135655.15 | 5.122171607 | 4.913296055 | 5.897656445 |
| PKD1    | ENSG00000008710.19 | 4.849760391 | 4.452137708 | 4.961688751 |
| ALKBH7  | ENSG00000125652.7  | 4.321721594 | 4.855956052 | 5.536317387 |
| SVIL    | ENSG00000197321.14 | 6.500189496 | 4.426155049 | 5.459881324 |

|          |                    |             |             |             |
|----------|--------------------|-------------|-------------|-------------|
| THAP11   | ENSG00000168286.2  | 5.821035232 | 4.356765608 | 4.456397698 |
| TRAPPC4  | ENSG00000196655.11 | 5.802628848 | 4.611376674 | 5.184919849 |
| STRADB   | ENSG00000082146.12 | 4.401387983 | 5.755246698 | 5.477491955 |
| CUL2     | ENSG00000108094.14 | 5.200651641 | 4.869318476 | 5.40912138  |
| CNOT7    | ENSG00000198791.11 | 5.307333901 | 4.282534761 | 5.573076213 |
| DCTN4    | ENSG00000132912.12 | 6.020820641 | 5.469598307 | 6.636916086 |
| EID2     | ENSG00000176396.10 | 5.148549084 | 5.239371576 | 4.31408734  |
| SCAF8    | ENSG00000213079.9  | 5.291475636 | 4.662758276 | 4.694543934 |
| NOC3L    | ENSG00000173145.11 | 6.249815894 | 4.260225303 | 4.716173801 |
| KBTBD4   | ENSG00000123444.13 | 5.171800503 | 4.750647636 | 4.957870209 |
| LLGL1    | ENSG00000131899.10 | 5.18323275  | 4.236327202 | 4.511072014 |
| ETNK1    | ENSG00000139163.15 | 5.359318815 | 4.970442006 | 5.754708754 |
| MT1X     | ENSG00000187193.8  | 5.261672416 | 5.186966195 | 4.308835542 |
| MTSS1L   | ENSG00000132613.14 | 5.230616025 | 4.334057432 | 4.486395593 |
| RNF31    | ENSG00000092098.16 | 4.93899263  | 4.601119638 | 4.805677993 |
| PTBP3    | ENSG00000119314.15 | 5.965919364 | 6.362360464 | 5.350362731 |
| ODF2     | ENSG00000136811.16 | 6.302637639 | 5.899535672 | 4.280176776 |
| SYNJ2BP  | ENSG00000213463.4  | 4.663733924 | 4.308125495 | 4.723988729 |
| DHX57    | ENSG00000163214.20 | 5.430899437 | 5.178541272 | 4.356155278 |
| MAVS     | ENSG00000088888.17 | 5.592926146 | 5.730117404 | 4.30232231  |
| ZNF335   | ENSG00000198026.7  | 4.859547701 | 4.584428317 | 4.225401622 |
| SIPA1    | ENSG00000213445.9  | 4.496982921 | 4.751756386 | 5.56052833  |
| PMM1     | ENSG00000100417.11 | 4.351632314 | 5.561344056 | 5.514722113 |
| BCL7C    | ENSG00000099385.11 | 5.33301345  | 4.270874169 | 4.897457072 |
| FASTKD5  | ENSG00000215251.3  | 5.626683543 | 5.788701865 | 4.262482172 |
| GOLGB1   | ENSG00000173230.15 | 5.313286514 | 5.512052901 | 5.464947121 |
| TOR1A    | ENSG00000136827.11 | 6.626535142 | 6.072382248 | 4.252637344 |
| COG5     | ENSG00000164597.13 | 4.216785927 | 6.010838776 | 6.154462987 |
| RPS6KA1  | ENSG00000117676.13 | 5.819976578 | 5.166285404 | 4.713089463 |
| KLF3     | ENSG00000109787.12 | 4.691902792 | 4.725012127 | 5.494905549 |
| EPS15L1  | ENSG00000127527.13 | 5.570420011 | 5.867559954 | 5.306350192 |
| RNF111   | ENSG00000157450.15 | 4.665480141 | 4.923618301 | 5.074794741 |
| TNKS     | ENSG00000173273.15 | 4.259682916 | 4.351893595 | 5.730860332 |
| MPDU1    | ENSG00000129255.15 | 5.931634913 | 4.486641479 | 5.150087139 |
| PXK      | ENSG00000168297.15 | 4.64281057  | 5.258829516 | 5.93737392  |
| TTI1     | ENSG00000101407.12 | 5.429004328 | 4.808177532 | 4.905143213 |
| VRK3     | ENSG00000105053.10 | 5.07588218  | 4.991704728 | 5.407200632 |
| SNUPN    | ENSG00000169371.13 | 5.246829578 | 4.723315945 | 4.50780092  |
| TMEM203  | ENSG00000187713.6  | 6.13958354  | 6.037183038 | 4.262940758 |
| WDR48    | ENSG00000114742.13 | 5.863105371 | 5.091819602 | 4.632332331 |
| CASP8    | ENSG00000064012.21 | 5.941953691 | 5.903702589 | 4.566642115 |
| TRNT1    | ENSG00000072756.16 | 5.208685381 | 5.260850954 | 4.253705898 |
| NPAS2    | ENSG00000170485.16 | 6.839535528 | 6.785414198 | 5.038488324 |
| CCDC88A  | ENSG00000115355.15 | 5.026612346 | 5.796730166 | 4.333636965 |
| TRAPPC11 | ENSG00000168538.15 | 5.091698067 | 4.248222409 | 4.893387787 |
| ALS2     | ENSG00000003393.14 | 4.242372723 | 5.362393175 | 5.357799769 |

|          |                    |             |             |             |
|----------|--------------------|-------------|-------------|-------------|
| KNSTRN   | ENSG00000128944.13 | 6.390748278 | 5.012459763 | 4.314133903 |
| AKAP10   | ENSG00000108599.14 | 5.024304229 | 4.239090823 | 4.650738358 |
| RHOT1    | ENSG00000126858.16 | 5.016052634 | 5.071374777 | 5.405684644 |
| TMEM19   | ENSG00000139291.13 | 4.46732146  | 4.404558562 | 4.408423577 |
| C1orf123 | ENSG00000162384.13 | 5.093758295 | 4.25018748  | 4.69718354  |
| RCC1     | ENSG00000180198.15 | 7.314305708 | 5.609487342 | 4.520172784 |
| RIT1     | ENSG00000143622.10 | 4.484066599 | 4.84480242  | 4.31736024  |
| QTRT2    | ENSG00000151576.10 | 4.665985841 | 4.920286502 | 4.26275565  |
| SP2      | ENSG00000167182.14 | 5.097275424 | 4.619608978 | 4.80245111  |
| TRIB1    | ENSG00000173334.3  | 5.598694351 | 5.661669273 | 7.322534095 |
| RPP21    | ENSG00000241370.5  | 4.703689169 | 4.640389526 | 4.944818231 |
| SNHG17   | ENSG00000196756.11 | 6.816981096 | 5.216361268 | 5.427267777 |
| MRPS26   | ENSG00000125901.5  | 7.018782382 | 5.704873848 | 4.274768755 |
| ZNF746   | ENSG00000181220.15 | 4.297256653 | 4.792645634 | 4.346322445 |
| BCL9     | ENSG00000116128.10 | 5.456217375 | 5.355879378 | 4.191964419 |
| RBFA     | ENSG00000101546.12 | 4.697881935 | 4.9367846   | 4.633917944 |
| PPIG     | ENSG00000138398.15 | 4.294975721 | 5.301147673 | 4.981134705 |
| ZNF644   | ENSG00000122482.20 | 4.895177129 | 4.643411115 | 4.257484169 |
| LZTR1    | ENSG00000099949.18 | 4.386782409 | 5.520366501 | 5.268450827 |
| NIPAL3   | ENSG00000001461.16 | 6.576489421 | 4.956707972 | 5.709296439 |
| NOL9     | ENSG00000162408.10 | 4.963496321 | 5.016855838 | 4.344720984 |
| ANKRD13A | ENSG00000076513.16 | 5.290845754 | 4.565185175 | 4.32962709  |
| TSPAN6   | ENSG00000000003.14 | 4.50957857  | 5.037265269 | 4.904988803 |
| GSDMD    | ENSG00000104518.10 | 5.283294775 | 4.690528357 | 5.17195681  |
| COPZ2    | ENSG00000005243.9  | 4.884746444 | 4.454643135 | 4.845239583 |
| GLTP     | ENSG00000139433.9  | 5.567110046 | 5.873705317 | 4.330252303 |
| RBM48    | ENSG00000127993.15 | 4.628669926 | 4.614090966 | 4.391832199 |
| PCCB     | ENSG00000114054.13 | 4.892184873 | 5.420209919 | 5.609956993 |
| IFI27L2  | ENSG00000119632.3  | 5.400399798 | 6.140114528 | 4.301145493 |
| TOP3B    | ENSG00000100038.19 | 4.238070335 | 5.07585207  | 4.585245945 |
| LRCH3    | ENSG00000186001.12 | 4.236504309 | 5.46808598  | 4.980647028 |
| GFER     | ENSG00000127554.12 | 4.900109201 | 4.228176252 | 4.817034318 |
| C2orf74  | ENSG00000237651.6  | 4.448844927 | 4.82190204  | 5.038195599 |
| ALAD     | ENSG00000148218.15 | 5.445184612 | 6.33915706  | 4.182795474 |
| IFT43    | ENSG00000119650.12 | 4.517975234 | 4.386504617 | 4.936625545 |
| COA7     | ENSG00000162377.5  | 5.721238888 | 4.693050361 | 4.181144992 |
| AACS     | ENSG00000081760.16 | 5.044885545 | 4.798560183 | 5.487216434 |
| ACAD8    | ENSG00000151498.11 | 4.46210809  | 4.422687798 | 4.378820235 |
| SIRT7    | ENSG00000187531.13 | 4.479114802 | 4.787498127 | 5.125010621 |
| CWF19L1  | ENSG00000095485.17 | 5.664497929 | 4.719277487 | 4.727058162 |
| GGPS1    | ENSG00000152904.11 | 5.663303893 | 4.160126421 | 4.853568382 |
| MRPS18C  | ENSG00000163319.10 | 4.989538091 | 4.678931758 | 4.277387342 |
| DPP8     | ENSG00000074603.18 | 5.041602689 | 4.968653415 | 4.644501333 |
| HMGCL    | ENSG00000117305.14 | 4.20902951  | 5.40960458  | 4.656008233 |
| NBAS     | ENSG00000151779.12 | 4.488289816 | 5.349902585 | 4.797976045 |
| FPGS     | ENSG00000136877.14 | 5.640740025 | 5.818745824 | 4.288048385 |

|          |                    |             |             |             |
|----------|--------------------|-------------|-------------|-------------|
| CASP2    | ENSG00000106144.19 | 4.552522086 | 4.484285918 | 4.394064498 |
| PML      | ENSG00000140464.19 | 5.259508896 | 5.237493388 | 4.361098936 |
| CHM      | ENSG00000188419.13 | 4.696323815 | 5.139293764 | 5.092354746 |
| INTS5    | ENSG00000185085.2  | 5.441937854 | 4.254536588 | 4.417083283 |
| MYLIP    | ENSG00000007944.14 | 4.533475658 | 5.36980184  | 5.073638734 |
| PGRMC2   | ENSG00000164040.16 | 4.792165384 | 5.726147526 | 5.546980685 |
| IQCB1    | ENSG00000173226.16 | 4.694005942 | 4.700997999 | 4.68480988  |
| PDK3     | ENSG00000067992.12 | 4.264826296 | 4.544938402 | 5.208180552 |
| FEZ2     | ENSG00000171055.14 | 4.728081063 | 4.991086823 | 4.516532203 |
| PSPH     | ENSG00000146733.13 | 5.74308845  | 6.427205497 | 5.467440065 |
| LPCAT4   | ENSG00000176454.13 | 5.781910322 | 5.779747367 | 4.23702863  |
| C19orf12 | ENSG00000131943.17 | 4.961287983 | 6.256855006 | 5.501086567 |
| E2F6     | ENSG00000169016.16 | 4.765499476 | 4.48725276  | 4.332252177 |
| LSM12    | ENSG00000161654.9  | 5.893765024 | 5.490704149 | 5.20986487  |
| DDI2     | ENSG00000197312.11 | 4.864553223 | 5.357095099 | 4.358044031 |
| TMEM63A  | ENSG00000196187.11 | 5.281778561 | 4.249405656 | 5.079575052 |
| RNF2     | ENSG00000121481.10 | 4.847282691 | 4.420047438 | 4.195846042 |
| VPS72    | ENSG00000163159.12 | 5.982099701 | 5.919614026 | 4.706026479 |
| CETN3    | ENSG00000153140.8  | 5.674553121 | 4.505753269 | 5.015877358 |
| THOC3    | ENSG00000051596.9  | 5.034029131 | 4.907140427 | 4.296807615 |
| XRCC2    | ENSG00000196584.2  | 4.911522875 | 4.233097518 | 4.316686936 |
| AKIRIN2  | ENSG00000135334.8  | 5.852850979 | 5.136124787 | 5.145249792 |
| NUDT15   | ENSG00000136159.3  | 5.926581903 | 4.652881866 | 4.197089944 |
| PARP2    | ENSG00000129484.13 | 5.238776119 | 4.341054856 | 4.228697425 |
| TMEM33   | ENSG00000109133.12 | 5.8228729   | 5.230983562 | 6.448150832 |
| PDE6D    | ENSG00000156973.13 | 5.347695817 | 6.150529725 | 5.836586103 |
| DIS3L2   | ENSG00000144535.19 | 4.216466285 | 4.436476705 | 4.551832757 |
| C6orf120 | ENSG00000185127.6  | 4.944131229 | 4.831327904 | 4.559109754 |
| HAUS1    | ENSG00000152240.12 | 5.803546403 | 5.534514809 | 4.316426283 |
| NTHL1    | ENSG00000065057.7  | 5.649771494 | 4.713926062 | 4.261848423 |
| THOC1    | ENSG00000079134.11 | 5.044395347 | 5.125881275 | 4.343814089 |
| C2orf68  | ENSG00000168887.10 | 5.545498178 | 4.517687717 | 4.411954417 |
| POMT1    | ENSG00000130714.15 | 4.307151496 | 5.316812067 | 4.219855881 |
| NSD1     | ENSG00000165671.19 | 5.441973239 | 4.240163382 | 4.60997343  |
| WWP2     | ENSG00000198373.12 | 6.031217252 | 4.568413941 | 5.250947014 |
| STK16    | ENSG00000115661.13 | 4.283441772 | 4.674766423 | 4.83334733  |
| PIN4     | ENSG00000102309.12 | 5.262049929 | 5.169985813 | 4.227645095 |
| COG2     | ENSG00000135775.13 | 5.479267183 | 4.19701101  | 4.581065908 |
| BPGM     | ENSG00000172331.11 | 4.202393364 | 5.706601625 | 5.114833602 |
| SDE2     | ENSG00000143751.9  | 5.689904477 | 4.194799694 | 4.357832228 |
| ATPAF1   | ENSG00000123472.12 | 4.905048351 | 4.352601268 | 4.656023339 |
| FBXL3    | ENSG00000005812.10 | 5.284585848 | 4.225346658 | 4.668129023 |
| NDUFAF7  | ENSG00000003509.15 | 5.44958972  | 5.179787439 | 4.414074653 |
| SBF2     | ENSG00000133812.15 | 4.442553145 | 5.31742537  | 5.631185479 |
| ACP2     | ENSG00000134575.9  | 5.145908156 | 4.559088398 | 4.721504999 |
| POLR3H   | ENSG00000100413.16 | 5.297747931 | 4.65258808  | 4.775485157 |

|           |                    |             |             |             |
|-----------|--------------------|-------------|-------------|-------------|
| GATC      | ENSG00000257218.5  | 4.765497263 | 4.695772525 | 5.725238648 |
| NDUFAF1   | ENSG00000137806.8  | 5.694588678 | 4.787558011 | 5.202938895 |
| SNAP47    | ENSG00000143740.14 | 5.721852264 | 4.1931769   | 4.890031351 |
| BSDC1     | ENSG00000160058.18 | 5.173240543 | 5.20194011  | 4.987627222 |
| MED17     | ENSG00000042429.11 | 5.995821109 | 4.222139818 | 4.891104279 |
| SUPV3L1   | ENSG00000156502.13 | 5.404415314 | 4.886089319 | 4.964125857 |
| EED       | ENSG00000074266.19 | 5.873258913 | 4.227304218 | 4.7026769   |
| INPP4B    | ENSG00000109452.12 | 5.256556381 | 5.876059509 | 6.469754615 |
| WDR18     | ENSG00000065268.10 | 6.378714651 | 5.522271198 | 5.140594919 |
| PVT1      | ENSG00000249859.9  | 4.339660816 | 5.913787822 | 5.366882918 |
| SPPL2B    | ENSG00000005206.16 | 4.721252212 | 5.645415086 | 4.312706754 |
| TUBG2     | ENSG00000037042.8  | 4.650520993 | 5.310642154 | 5.391407563 |
| SMIM4     | ENSG00000168273.7  | 4.945390949 | 6.038562356 | 4.418102489 |
| SNAP29    | ENSG00000099940.11 | 4.453386925 | 5.147778637 | 5.466634965 |
| MICAL1    | ENSG00000135596.17 | 4.220621884 | 8.061975875 | 6.509152693 |
| GPANK1    | ENSG00000204438.10 | 5.204402579 | 4.411418917 | 4.565569301 |
| SLC44A2   | ENSG00000129353.14 | 6.012839837 | 5.369424773 | 4.409656144 |
| WRB       | ENSG00000182093.14 | 4.338257628 | 5.8264686   | 5.648066025 |
| WEE1      | ENSG00000166483.10 | 4.69052063  | 4.620806496 | 4.577190868 |
| C1GALT1C1 | ENSG00000171155.7  | 5.285789255 | 5.27340952  | 4.251404724 |
| ANAPC15   | ENSG00000110200.8  | 5.805959619 | 4.40478531  | 4.977512251 |
| CCNC      | ENSG00000112237.12 | 5.464343255 | 5.406981528 | 5.209442388 |
| CLIP4     | ENSG00000115295.19 | 6.139465307 | 5.706970576 | 6.552515474 |
| AMFR      | ENSG00000159461.14 | 5.37659891  | 5.051414366 | 6.634805628 |
| NEURL4    | ENSG00000215041.9  | 5.08048267  | 4.262028271 | 4.570626137 |
| S100A13   | ENSG00000189171.14 | 8.024241415 | 7.317125074 | 5.252540418 |
| NFKBIL1   | ENSG00000204498.10 | 4.877092366 | 4.624745858 | 5.344320265 |
| MCUR1     | ENSG00000050393.11 | 4.398569948 | 4.191216854 | 5.218019072 |
| YTHDC2    | ENSG00000047188.15 | 4.494993507 | 4.305693826 | 4.706347388 |
| ISG20L2   | ENSG00000143319.16 | 7.391829191 | 5.994491693 | 4.593689965 |
| TBCE      | ENSG00000116957.12 | 6.371990176 | 4.187976565 | 5.030482157 |
| TXNL1     | ENSG00000091164.12 | 4.764969358 | 6.36091515  | 4.565610511 |
| NUDT2     | ENSG00000164978.17 | 4.610455791 | 4.586871406 | 4.269650549 |
| FAM53C    | ENSG00000120709.10 | 5.648217148 | 4.870637117 | 4.796621285 |
| TYW1      | ENSG00000198874.12 | 4.316107032 | 4.953808756 | 4.641203618 |
| PUSL1     | ENSG00000169972.11 | 4.84356754  | 4.398357784 | 4.385916614 |
| SMAD4     | ENSG00000141646.13 | 4.556946353 | 5.133139496 | 4.215989697 |
| RPUSD1    | ENSG00000007376.7  | 5.469804326 | 4.815189284 | 4.488582505 |
| GOLT1B    | ENSG00000111711.9  | 5.269312968 | 6.151000584 | 5.511186115 |
| RWDD3     | ENSG00000122481.16 | 4.214074023 | 4.442532366 | 4.489257247 |
| TUBGCP2   | ENSG00000130640.13 | 6.394062696 | 5.48069551  | 5.2474954   |
| LRCH1     | ENSG00000136141.14 | 4.119668547 | 4.427674917 | 4.685632766 |
| GGA3      | ENSG00000125447.16 | 4.527643568 | 4.290254674 | 4.891963301 |
| CDC73     | ENSG00000134371.10 | 5.371283859 | 4.727839827 | 4.623422659 |
| ATAD3B    | ENSG00000160072.19 | 5.596894944 | 5.856507753 | 4.468668685 |
| ZBTB33    | ENSG00000177485.6  | 4.921413629 | 5.64324314  | 5.112988999 |

|          |                    |             |             |             |
|----------|--------------------|-------------|-------------|-------------|
| TMEM55A  | ENSG00000155099.7  | 4.159542408 | 5.35766917  | 6.366754189 |
| MIIP     | ENSG00000116691.10 | 4.575036374 | 4.913920812 | 4.795272053 |
| HDHD5    | ENSG00000069998.12 | 5.167267664 | 5.433295647 | 4.687864244 |
| TMEM55B  | ENSG00000165782.10 | 4.329663655 | 4.297131682 | 5.001535947 |
| GNAQ     | ENSG00000156052.10 | 5.401742517 | 5.254330907 | 5.388862671 |
| DDX11    | ENSG00000013573.16 | 5.520999257 | 4.868216228 | 4.180308102 |
| DNAJC1   | ENSG00000136770.10 | 4.541144881 | 4.699810236 | 4.795839661 |
| SNHG3    | ENSG00000242125.3  | 6.006168657 | 5.395186854 | 4.284808331 |
| ERGIC2   | ENSG00000087502.17 | 5.359883539 | 5.359066102 | 4.327557792 |
| HCFC1R1  | ENSG00000103145.10 | 5.519760181 | 5.235043064 | 4.597822502 |
| KIF11    | ENSG00000138160.5  | 6.910594518 | 4.217650399 | 4.229432997 |
| COQ4     | ENSG00000167113.10 | 6.223299337 | 6.07635896  | 4.263618572 |
| ZZEF1    | ENSG00000074755.14 | 4.618472601 | 4.15950641  | 4.438677517 |
| C16orf72 | ENSG00000182831.11 | 5.415242955 | 5.177109594 | 4.817238851 |
| DCAF12   | ENSG00000198876.12 | 6.110122958 | 4.493796069 | 4.407391122 |
| MAP3K20  | ENSG00000091436.16 | 4.254763633 | 5.018339653 | 5.681661252 |
| SELENOI  | ENSG00000138018.17 | 5.788087648 | 4.928174675 | 4.143532331 |
| BID      | ENSG00000015475.18 | 4.290707356 | 4.484557008 | 4.207829043 |
| MTG1     | ENSG00000148824.18 | 5.952325124 | 4.6379958   | 5.001232422 |
| SLC39A13 | ENSG00000165915.13 | 5.160149965 | 5.904815016 | 5.762603389 |
| PIGB     | ENSG00000069943.9  | 4.212334939 | 5.246168247 | 4.60783189  |
| PITPNM1  | ENSG00000110697.12 | 5.241920977 | 4.755559352 | 4.543177218 |
| CCNK     | ENSG00000090061.17 | 5.736713994 | 6.595452925 | 4.287320413 |
| CDC42EP3 | ENSG00000163171.7  | 6.042463374 | 4.608397619 | 5.47000411  |
| MINDY3   | ENSG00000148481.13 | 4.222665071 | 4.650734918 | 4.9860287   |
| MCRIP2   | ENSG00000172366.19 | 4.934190802 | 5.628560646 | 6.404919186 |
| HMMR     | ENSG00000072571.19 | 6.121450341 | 4.306433554 | 4.676249108 |
| ZNF277   | ENSG00000198839.9  | 4.634430147 | 5.27692246  | 5.34709466  |
| PHACTR4  | ENSG00000204138.12 | 5.440071477 | 4.357587325 | 6.001492055 |
| KANSL1   | ENSG00000120071.13 | 4.652005689 | 4.755680847 | 5.548306385 |
| MED6     | ENSG00000133997.11 | 5.159300466 | 4.429442354 | 4.207819831 |
| GOSR2    | ENSG00000108433.16 | 4.478678438 | 4.706295201 | 4.855084906 |
| NOP9     | ENSG00000196943.12 | 4.405914893 | 4.17151784  | 4.149656545 |
| REV1     | ENSG00000135945.9  | 4.147337109 | 4.622970643 | 4.696418398 |
| NES      | ENSG00000132688.10 | 8.017988093 | 4.747745458 | 5.925943228 |
| AKAP17A  | ENSG00000197976.11 | 4.895329989 | 4.234364397 | 5.875562561 |
| TNKS1BP1 | ENSG00000149115.13 | 5.955680616 | 5.844258778 | 5.140447462 |
| BRI3BP   | ENSG00000184992.10 | 5.441699743 | 4.362648357 | 5.039033932 |
| HACD2    | ENSG00000206527.9  | 5.442004391 | 4.466000373 | 4.457394548 |
| FNTB     | ENSG00000257365.7  | 4.340536389 | 5.180127421 | 4.663105554 |
| ZFC3H1   | ENSG00000133858.15 | 5.486687629 | 4.536995133 | 4.577862478 |
| PCTP     | ENSG00000141179.13 | 4.166215249 | 5.002529567 | 5.471512339 |
| GGCX     | ENSG00000115486.11 | 4.782328877 | 5.389482543 | 4.193440389 |
| TMOD3    | ENSG00000138594.13 | 5.046838096 | 4.888059602 | 5.125639796 |
| DHX29    | ENSG00000067248.9  | 5.681077053 | 4.907150816 | 4.120882236 |
| NUP35    | ENSG00000163002.12 | 4.51807584  | 5.020655694 | 4.134134183 |



|            |                    |             |             |             |
|------------|--------------------|-------------|-------------|-------------|
| SLC12A2    | ENSG00000064651.13 | 5.638847848 | 4.613573927 | 4.420975535 |
| MED19      | ENSG00000156603.16 | 5.425381204 | 4.343610733 | 5.049878917 |
| GINM1      | ENSG00000055211.12 | 4.953729508 | 4.588511715 | 4.196257687 |
| ADPRHL2    | ENSG00000116863.10 | 5.525663221 | 4.660515601 | 4.68520566  |
| RTL6       | ENSG00000188636.3  | 5.092562156 | 4.365568833 | 4.465365695 |
| C20orf27   | ENSG00000101220.17 | 6.177863372 | 6.491115415 | 4.359143781 |
| ZNF3       | ENSG00000166526.16 | 4.5351562   | 5.123809955 | 4.170811147 |
| LRCH4      | ENSG00000077454.15 | 4.427983204 | 5.499466197 | 5.472915105 |
| C4orf48    | ENSG00000243449.6  | 5.626235078 | 4.910497725 | 7.146459931 |
| SNX11      | ENSG00000002919.14 | 4.801771805 | 5.118763399 | 5.388318866 |
| AC006001.3 | ENSG00000229180.6  | 4.706542893 | 5.537891727 | 4.208628861 |
| SETD1A     | ENSG00000099381.17 | 5.29617565  | 4.547664152 | 4.259589071 |
| MPV17L2    | ENSG00000254858.9  | 5.29892961  | 5.568472246 | 4.162879276 |
| PSMD9      | ENSG00000110801.13 | 5.003102658 | 4.676985521 | 4.826633262 |
| DBF4B      | ENSG00000161692.17 | 4.297754174 | 4.898366278 | 4.195916489 |
| VSIG10     | ENSG00000176834.13 | 5.025537158 | 4.959588849 | 5.128360628 |
| C3orf38    | ENSG00000179021.9  | 4.861116518 | 4.839319526 | 4.291617089 |
| SLC12A9    | ENSG00000146828.17 | 4.258504972 | 5.171864562 | 4.555616045 |
| LZTS1      | ENSG00000061337.15 | 4.722576491 | 5.891156865 | 6.126048366 |
| CANT1      | ENSG00000171302.16 | 5.118999612 | 6.102142241 | 5.883566358 |
| TAF6L      | ENSG00000162227.7  | 5.144287179 | 4.18722871  | 4.648373356 |
| SMIM13     | ENSG00000224531.5  | 4.212921144 | 4.19027304  | 5.15302922  |
| ABI2       | ENSG00000138443.15 | 4.941045058 | 4.884047943 | 5.167731455 |
| PARP10     | ENSG00000178685.13 | 4.4474816   | 4.902312779 | 4.535965859 |
| TMEM223    | ENSG00000168569.7  | 5.568327162 | 4.581900207 | 4.119563957 |
| TP53BP2    | ENSG00000143514.16 | 5.354660193 | 4.248980514 | 4.410085385 |
| WDR90      | ENSG00000161996.18 | 5.029819572 | 4.13300436  | 4.552128387 |
| SLC35B2    | ENSG00000157593.18 | 4.238171865 | 4.906594296 | 4.592985301 |
| TNIP2      | ENSG00000168884.14 | 4.698898576 | 4.603537254 | 5.902984601 |
| VPS37B     | ENSG00000139722.6  | 6.471376715 | 6.290716879 | 6.511436644 |
| SMC6       | ENSG00000163029.15 | 5.810792522 | 5.130972764 | 4.23317657  |
| CRNKL1     | ENSG00000101343.14 | 5.475358599 | 5.252712684 | 4.115651518 |
| DNAJB12    | ENSG00000148719.14 | 4.816025621 | 4.52324596  | 4.631579729 |
| SPOUT1     | ENSG00000198917.12 | 5.042834445 | 5.532506822 | 4.586949927 |
| MKNK2      | ENSG00000099875.14 | 5.335826697 | 5.897556368 | 5.58632358  |
| MICA       | ENSG00000204520.12 | 4.580826631 | 5.559864295 | 4.151998297 |
| FDX2       | ENSG00000267673.6  | 5.121335487 | 4.37159418  | 4.677269548 |
| KLHL21     | ENSG00000162413.16 | 6.386916309 | 6.111071737 | 5.528741887 |
| PAN2       | ENSG00000135473.14 | 5.667884258 | 5.109698587 | 5.418752341 |
| NKIRAS2    | ENSG00000168256.17 | 5.69961653  | 4.864809209 | 5.025364832 |
| PLPPR2     | ENSG00000105520.10 | 5.585326759 | 5.170946533 | 4.180543736 |
| PEX13      | ENSG00000162928.8  | 4.396136307 | 4.724085736 | 4.476819747 |
| MITD1      | ENSG00000158411.11 | 4.218705025 | 5.467223673 | 4.600230875 |
| CISD2      | ENSG00000145354.9  | 4.434680325 | 4.453635672 | 4.584535381 |
| NFKB1      | ENSG00000109320.11 | 5.879529719 | 5.118198772 | 4.110596964 |
| BCOR       | ENSG00000183337.16 | 5.527690617 | 4.290590041 | 4.334740835 |

|          |                    |             |             |             |
|----------|--------------------|-------------|-------------|-------------|
| METR1    | ENSG00000103260.8  | 5.313807273 | 4.227213983 | 4.803070716 |
| MED12    | ENSG00000184634.15 | 5.21396225  | 4.854958923 | 5.330047924 |
| SPTY2D1  | ENSG00000179119.14 | 4.457304906 | 4.874537517 | 4.476539829 |
| RAPGEF2  | ENSG00000109756.8  | 5.014583747 | 4.679685982 | 4.716630334 |
| SAT2     | ENSG00000141504.11 | 5.100909728 | 4.473003708 | 4.843548526 |
| STAG3L5P | ENSG00000242294.6  | 4.355677417 | 5.231896299 | 6.32019738  |
| DNAH14   | ENSG00000185842.15 | 5.794956084 | 4.356715653 | 5.251342186 |
| JADE2    | ENSG00000043143.20 | 5.767048513 | 5.029427102 | 6.783715557 |
| SNX18    | ENSG00000178996.13 | 4.236480969 | 4.967967626 | 4.126168088 |
| DNAJC9   | ENSG00000213551.4  | 4.862997977 | 4.284910806 | 4.213358601 |
| CRNDE    | ENSG00000245694.9  | 5.676824313 | 4.419530774 | 6.413606874 |
| LIN7C    | ENSG00000148943.11 | 4.693228492 | 4.754552869 | 4.608602286 |
| C17orf80 | ENSG00000141219.15 | 4.860056435 | 4.824273565 | 4.979802366 |
| SAR1A    | ENSG00000079332.14 | 4.997513532 | 5.431483409 | 4.634003093 |
| HPS4     | ENSG00000100099.20 | 4.260858175 | 7.012881884 | 6.888074542 |
| RAP2A    | ENSG00000125249.6  | 5.434430918 | 4.779393215 | 4.117665089 |
| PAN3     | ENSG00000152520.13 | 4.850195046 | 4.146075227 | 4.555708831 |
| CFDP1    | ENSG00000153774.8  | 5.943601182 | 4.964879495 | 6.110947089 |
| NR3C1    | ENSG00000113580.14 | 4.84168914  | 4.153705301 | 5.223186297 |
| SNHG19   | ENSG00000260260.1  | 6.545497829 | 4.225034957 | 5.069311553 |
| PHF14    | ENSG00000106443.15 | 5.765574062 | 5.518050286 | 4.758583954 |
| CHUK     | ENSG00000213341.10 | 5.782582956 | 4.554965582 | 4.450936562 |
| WDTC1    | ENSG00000142784.15 | 5.032701134 | 4.677160906 | 5.490476709 |
| KIF20A   | ENSG00000112984.11 | 6.754117544 | 4.171038629 | 4.235727608 |
| SWI5     | ENSG00000175854.11 | 5.201283303 | 6.018173986 | 5.037631711 |
| UPF3B    | ENSG00000125351.11 | 5.046652598 | 4.621070413 | 4.58092376  |
| RIOK1    | ENSG00000124784.8  | 5.582649451 | 4.529059373 | 4.174175321 |
| MRPS23   | ENSG00000181610.12 | 5.469105915 | 4.745638921 | 5.023182798 |
| TM2D3    | ENSG00000184277.12 | 5.125173402 | 5.108824087 | 4.274029834 |
| RPRD1A   | ENSG00000141425.17 | 5.124195201 | 5.816905905 | 4.337424592 |
| CLN3     | ENSG00000188603.18 | 4.499395889 | 4.565043298 | 4.716129703 |
| ACOX1    | ENSG00000161533.11 | 4.437552886 | 4.474636886 | 5.228452226 |
| TPD52    | ENSG00000076554.15 | 5.483925367 | 5.788806521 | 7.000139178 |
| XPC      | ENSG00000154767.14 | 5.488537071 | 5.693266849 | 4.429594088 |
| RPUSD4   | ENSG00000165526.8  | 4.96219146  | 4.14170092  | 4.57346446  |
| DDX52    | ENSG00000278053.4  | 4.736860271 | 4.251246568 | 4.861114819 |
| WIZ      | ENSG00000011451.17 | 5.93367943  | 5.491566128 | 5.311874698 |
| C16orf91 | ENSG00000174109.4  | 6.120642519 | 4.617381626 | 4.15120631  |
| KCTD2    | ENSG00000180901.10 | 4.443562328 | 4.126311224 | 5.139546474 |
| ATXN7L3B | ENSG00000253719.3  | 5.87321176  | 4.529361974 | 6.053895182 |
| RBM12B   | ENSG00000183808.11 | 4.820456073 | 4.319593097 | 4.525632225 |
| TRIOBP   | ENSG00000100106.19 | 5.632082553 | 4.583782234 | 4.504112621 |
| ZNF609   | ENSG00000180357.9  | 5.598910455 | 5.537265266 | 5.667986258 |
| NUP133   | ENSG00000069248.11 | 5.851009087 | 4.31864307  | 4.125589732 |
| ALDH1B1  | ENSG00000137124.7  | 5.061269451 | 6.027062608 | 4.375506474 |
| RNF19A   | ENSG00000034677.12 | 4.098907804 | 6.002116299 | 5.276735672 |

|           |                    |             |             |             |
|-----------|--------------------|-------------|-------------|-------------|
| CHMP6     | ENSG00000176108.9  | 4.993172119 | 4.934600456 | 5.178176674 |
| MTA3      | ENSG00000057935.13 | 4.812901337 | 4.981568116 | 4.316279219 |
| MRPL43    | ENSG00000055950.16 | 5.529785497 | 4.748943675 | 5.178183351 |
| TOM1      | ENSG00000100284.20 | 4.113548412 | 6.43701345  | 5.744054945 |
| LINC01184 | ENSG00000245937.7  | 5.107812472 | 4.188961517 | 5.07833911  |
| CCDC97    | ENSG00000142039.3  | 5.320926003 | 5.131449547 | 4.748730668 |
| TGFBRAP1  | ENSG00000135966.12 | 4.131130196 | 5.658084991 | 5.712944138 |
| DHX34     | ENSG00000134815.18 | 4.903428058 | 4.229787775 | 4.280214534 |
| PVR       | ENSG00000073008.14 | 5.620815713 | 4.770809952 | 4.364550949 |
| SLC38A7   | ENSG00000103042.8  | 4.23521051  | 4.809901289 | 4.197191805 |
| WASHC3    | ENSG00000120860.10 | 5.037229713 | 5.640854574 | 4.349505507 |
| ANAPC2    | ENSG00000176248.8  | 5.253761755 | 6.089660153 | 4.157468617 |
| SOS2      | ENSG00000100485.11 | 4.124231909 | 4.398203183 | 5.195991045 |
| MIGA1     | ENSG00000180488.14 | 4.664810982 | 4.439950683 | 4.517090209 |
| DGCR8     | ENSG00000128191.15 | 4.491455591 | 4.514338027 | 4.23315958  |
| RAP1A     | ENSG00000116473.14 | 5.39608262  | 4.419350981 | 4.452017823 |
| HDAC8     | ENSG00000147099.19 | 5.299216527 | 5.320613069 | 5.222858229 |
| MUT       | ENSG00000146085.7  | 4.071605274 | 4.973255115 | 5.167503604 |
| ENG       | ENSG00000106991.13 | 6.331209715 | 6.067516228 | 4.1031926   |
| GTF2A1    | ENSG00000165417.11 | 5.122184381 | 4.073032935 | 5.699461263 |
| CSRNP2    | ENSG00000110925.6  | 4.653454712 | 4.386462944 | 4.561875119 |
| APPBP2    | ENSG00000062725.9  | 4.173829612 | 4.483738371 | 4.33016563  |
| UVRAG     | ENSG00000198382.8  | 4.890583046 | 4.218163675 | 4.404399768 |
| MBD4      | ENSG00000129071.9  | 4.888024372 | 4.863625457 | 4.180324052 |
| TYRO3     | ENSG00000092445.11 | 4.466294566 | 5.211368372 | 4.242079635 |
| FAM193B   | ENSG00000146067.15 | 4.689141522 | 4.506112257 | 4.622463725 |
| EXOC2     | ENSG00000112685.13 | 4.192454485 | 4.581611744 | 5.13428838  |
| FAM120AOS | ENSG00000188938.15 | 4.964353978 | 5.300492931 | 4.461448463 |
| B4GALT7   | ENSG00000027847.13 | 4.301265969 | 4.575660915 | 4.320598851 |
| LTN1      | ENSG00000198862.13 | 4.707562339 | 4.221853284 | 4.516603544 |
| TBC1D5    | ENSG00000131374.14 | 5.089675898 | 5.052275709 | 5.217911979 |
| SDF2      | ENSG00000132581.9  | 5.553610327 | 5.731564561 | 5.359236895 |
| TMEM243   | ENSG00000135185.11 | 4.9774911   | 5.511826935 | 4.130397583 |
| FCF1      | ENSG00000119616.11 | 5.324268977 | 4.538138979 | 4.434794561 |
| SNX27     | ENSG00000143376.12 | 5.515321134 | 5.112353582 | 4.417704121 |
| KLHL5     | ENSG00000109790.16 | 5.01599736  | 4.315261998 | 8.390980183 |
| EEF1A1P5  | ENSG00000196205.8  | 5.808431217 | 4.535918695 | 4.781716339 |
| RBM18     | ENSG00000119446.13 | 4.34721989  | 5.115957847 | 4.699624474 |
| DDIT3     | ENSG00000175197.11 | 4.912019816 | 4.427897499 | 9.106009548 |
| PELO      | ENSG00000152684.10 | 5.30779558  | 4.55715948  | 4.091692679 |
| DMAP1     | ENSG00000178028.13 | 4.507572249 | 4.608643811 | 4.498710702 |
| BDH2      | ENSG00000164039.14 | 4.100430587 | 5.016944859 | 4.628602631 |
| PPIL3     | ENSG00000240344.8  | 4.548469036 | 4.29866187  | 4.670016615 |
| BCL9L     | ENSG00000186174.12 | 5.633041057 | 4.385576951 | 5.97419552  |
| MAP4K3    | ENSG00000011566.14 | 4.22915947  | 5.34736531  | 4.919135656 |
| SLC25A28  | ENSG00000155287.10 | 4.576196409 | 4.089893735 | 4.469378542 |

|            |                    |             |             |             |
|------------|--------------------|-------------|-------------|-------------|
| MAPRE3     | ENSG00000084764.10 | 4.900549    | 4.591576431 | 4.732019924 |
| CHCHD4     | ENSG00000163528.12 | 5.606467273 | 5.362634348 | 4.227607346 |
| CCNDBP1    | ENSG00000166946.13 | 5.010358609 | 5.692928067 | 5.59351102  |
| AC005154.1 | ENSG00000196295.11 | 4.09642419  | 5.140101304 | 4.959707023 |
| KANSL2     | ENSG00000139620.12 | 4.52523928  | 4.34619405  | 4.238736455 |
| SECISBP2   | ENSG00000187742.14 | 5.166038866 | 5.237326171 | 4.852574059 |
| ASB8       | ENSG00000177981.10 | 4.9156469   | 4.294040376 | 5.031392207 |
| WDR12      | ENSG00000138442.9  | 4.671533425 | 5.117326299 | 4.171299503 |
| DCAF11     | ENSG00000100897.17 | 5.099466901 | 4.577403533 | 5.614318062 |
| CHSY1      | ENSG00000131873.5  | 6.653828477 | 5.673285969 | 4.129906084 |
| ZNF692     | ENSG00000171163.15 | 5.351944426 | 5.257998706 | 4.827353599 |
| AFG3L1P    | ENSG00000223959.8  | 4.472329918 | 4.566701433 | 4.193333045 |
| DHTKD1     | ENSG00000181192.11 | 5.17978176  | 4.256263504 | 4.464062863 |
| PSMG4      | ENSG00000180822.11 | 4.734872836 | 5.079351111 | 4.545192033 |
| HELZ       | ENSG00000198265.11 | 4.813998487 | 5.044807121 | 5.323578047 |
| P3H4       | ENSG00000141696.12 | 5.17522006  | 5.176053729 | 4.415157636 |
| RNF219     | ENSG00000152193.7  | 5.013613562 | 4.106022939 | 4.168933803 |
| PCMTD1     | ENSG00000168300.13 | 4.441107581 | 4.466314827 | 5.148706938 |
| FOXN2      | ENSG00000170802.15 | 4.413374813 | 5.331614763 | 4.062399193 |
| CHST14     | ENSG00000169105.7  | 5.389452453 | 4.978274555 | 4.115269663 |
| RPS27L     | ENSG00000185088.13 | 5.486167247 | 6.030587472 | 6.312796992 |
| RASSF8     | ENSG00000123094.15 | 7.123525923 | 5.415347556 | 5.698650512 |
| C17orf58   | ENSG00000186665.9  | 4.719789366 | 4.477592377 | 5.076570644 |
| PIGH       | ENSG00000100564.8  | 4.245859905 | 5.137633707 | 5.395491809 |
| CLASP2     | ENSG00000163539.16 | 5.271751334 | 5.17553087  | 5.234578187 |
| AVPI1      | ENSG00000119986.6  | 6.006978352 | 7.138589434 | 4.984030277 |
| RNF4       | ENSG00000063978.15 | 4.302856954 | 4.517398646 | 6.168851493 |
| MYSM1      | ENSG00000162601.9  | 5.200955679 | 4.854402042 | 4.173618523 |
| SRFBP1     | ENSG00000151304.5  | 4.397615891 | 4.227388508 | 4.722869266 |
| CCDC9      | ENSG00000105321.12 | 4.494751416 | 4.169907592 | 4.955542912 |
| ANKRD27    | ENSG00000105186.15 | 4.982702778 | 5.557037706 | 5.409231927 |
| TBC1D20    | ENSG00000125875.13 | 4.656614272 | 5.128981437 | 4.3203997   |
| ARPIN      | ENSG00000242498.7  | 4.555848238 | 4.075804817 | 4.496692972 |
| VOPP1      | ENSG00000154978.12 | 4.341618383 | 5.531694553 | 4.168222308 |
| PPTC7      | ENSG00000196850.5  | 5.281208309 | 4.687189399 | 4.927669217 |
| CDR2       | ENSG00000140743.7  | 4.991046998 | 5.341734238 | 4.076446864 |
| FAM53B     | ENSG00000189319.13 | 4.06394789  | 5.415466225 | 5.19866866  |
| KRR1       | ENSG00000111615.13 | 5.079308919 | 4.526047127 | 5.594785101 |
| GPATCH8    | ENSG00000186566.12 | 5.141436987 | 5.358008888 | 5.657119828 |
| GMFB       | ENSG00000197045.12 | 5.867189807 | 5.488309676 | 5.616573958 |
| FRG1BP     | ENSG00000149531.15 | 4.910252266 | 5.033409681 | 6.046878854 |
| POLR3E     | ENSG00000058600.15 | 5.81028949  | 4.906598218 | 5.054022089 |
| TAF1B      | ENSG00000115750.16 | 5.099845779 | 4.320767416 | 4.232066465 |
| ABT1       | ENSG00000146109.4  | 4.633844715 | 4.554504604 | 4.331178347 |
| ZNF451     | ENSG00000112200.16 | 4.479922713 | 4.878270209 | 4.236398958 |
| GORASP1    | ENSG00000114745.13 | 4.762837881 | 5.17777973  | 4.403324747 |

|            |                    |             |             |             |
|------------|--------------------|-------------|-------------|-------------|
| GCC2       | ENSG00000135968.20 | 4.583217188 | 4.906037186 | 4.57271479  |
| SNRNP35    | ENSG00000184209.14 | 4.856290958 | 4.553262401 | 5.790195123 |
| VAMP7      | ENSG00000124333.15 | 4.878938583 | 5.049922956 | 4.930337677 |
| NRN1       | ENSG00000124785.8  | 4.310530857 | 5.123057243 | 5.809775029 |
| DCAF16     | ENSG00000163257.10 | 6.298233183 | 4.559260257 | 7.16173917  |
| POMGNT2    | ENSG00000144647.5  | 4.474553853 | 4.904575339 | 4.10276745  |
| SMYD2      | ENSG00000143499.13 | 5.50546763  | 4.643963614 | 4.558514305 |
| CDK9       | ENSG00000136807.13 | 6.303203455 | 6.209414591 | 4.104346934 |
| CSTF2T     | ENSG00000177613.8  | 4.8578163   | 4.60043358  | 4.348782915 |
| CHMP7      | ENSG00000147457.13 | 4.779974721 | 4.237250976 | 4.299869132 |
| AVL9       | ENSG00000105778.18 | 4.649231738 | 4.905350574 | 4.407913791 |
| UBTD1      | ENSG00000165886.4  | 4.702198739 | 4.6742715   | 5.346708954 |
| TSKU       | ENSG00000182704.7  | 4.71306834  | 5.635457176 | 7.053335173 |
| WBP1       | ENSG00000239779.6  | 5.581084569 | 6.097418395 | 4.379169853 |
| GCFC2      | ENSG00000005436.13 | 4.907501374 | 4.103172551 | 4.382616821 |
| COQ8B      | ENSG00000123815.11 | 5.270919059 | 5.166623359 | 4.911518537 |
| ABHD17A    | ENSG00000129968.15 | 4.615180157 | 4.765404965 | 5.432347194 |
| MELK       | ENSG00000165304.7  | 6.651864724 | 5.233710301 | 4.1649712   |
| GGA2       | ENSG00000103365.15 | 5.014603483 | 5.395971471 | 5.912510133 |
| R3HCC1     | ENSG00000104679.10 | 4.727649114 | 4.476503721 | 4.992652799 |
| MKL1       | ENSG00000196588.14 | 4.137318277 | 4.391466599 | 4.97612073  |
| HDAC2      | ENSG00000196591.11 | 6.23792069  | 5.564803613 | 4.632636929 |
| ZBTB17     | ENSG00000116809.11 | 4.944992452 | 5.121688775 | 5.036435583 |
| NCKIPSD    | ENSG00000213672.7  | 4.939446228 | 4.466742306 | 4.120129608 |
| ALG9       | ENSG00000086848.14 | 4.50127213  | 4.144209391 | 5.409838469 |
| TRMT6      | ENSG00000089195.14 | 6.318459288 | 5.93489148  | 4.264935795 |
| SSBP3      | ENSG00000157216.15 | 5.396037529 | 5.013913987 | 4.137366432 |
| GPRIN1     | ENSG00000169258.6  | 4.047861319 | 4.408792467 | 5.55023599  |
| GABPB1     | ENSG00000104064.16 | 4.983087362 | 4.517080138 | 4.544155022 |
| GMCL1      | ENSG00000087338.4  | 4.994752993 | 4.702044035 | 4.042117983 |
| PGS1       | ENSG00000087157.18 | 4.601574209 | 4.654005143 | 4.964586553 |
| MORC2      | ENSG00000133422.12 | 4.707204183 | 4.433057575 | 4.805377608 |
| ZEB2       | ENSG00000169554.18 | 4.633101928 | 7.206199615 | 5.820870645 |
| TXNRD2     | ENSG00000184470.20 | 4.601499228 | 4.387320316 | 4.815305004 |
| CNOT8      | ENSG00000155508.13 | 5.911308438 | 4.139852504 | 5.236331211 |
| USP40      | ENSG00000085982.13 | 4.161020997 | 5.558153455 | 5.083732774 |
| ZCCHC8     | ENSG00000033030.13 | 5.219278015 | 4.578839569 | 5.487944394 |
| EPHB4      | ENSG00000196411.9  | 5.173687611 | 5.824547018 | 4.152852453 |
| OTUD7B     | ENSG00000264522.5  | 5.008089548 | 5.113627649 | 4.132966292 |
| TAB1       | ENSG00000100324.13 | 4.711370972 | 4.336133246 | 4.50902077  |
| ANAPC16    | ENSG00000166295.8  | 5.01057968  | 4.350301918 | 5.611335336 |
| POT1       | ENSG00000128513.14 | 4.525542114 | 4.158294544 | 4.865059837 |
| ASXL2      | ENSG00000143970.16 | 4.899824383 | 4.762536389 | 4.039139905 |
| AC135050.6 | ENSG00000278133.1  | 4.452992714 | 4.293730617 | 5.415956421 |
| NINJ1      | ENSG00000131669.9  | 4.340299007 | 7.021008756 | 6.085917932 |
| DPH2       | ENSG00000132768.13 | 5.875735982 | 5.390639065 | 4.335235442 |

|            |                    |             |             |             |
|------------|--------------------|-------------|-------------|-------------|
| USP53      | ENSG00000145390.11 | 6.102318601 | 5.594073951 | 4.281789765 |
| CRTC3      | ENSG00000140577.15 | 4.180970046 | 5.392141549 | 4.946942533 |
| NOL6       | ENSG00000165271.16 | 7.048118382 | 5.405296722 | 4.038994571 |
| PUS7       | ENSG00000091127.13 | 5.610276443 | 5.355052553 | 4.153482015 |
| NPEPL1     | ENSG00000215440.11 | 4.395361293 | 4.797907299 | 4.572832545 |
| VPS37C     | ENSG00000167987.10 | 4.939628983 | 4.15850182  | 5.154445256 |
| DMWD       | ENSG00000185800.11 | 5.511995362 | 4.393748085 | 5.279796172 |
| C7orf26    | ENSG00000146576.12 | 4.739794496 | 5.230371127 | 4.895688081 |
| RUFY1      | ENSG00000176783.14 | 5.136463174 | 4.175646455 | 4.51146404  |
| DLGAP5     | ENSG00000126787.12 | 5.927893016 | 4.567743994 | 4.060405828 |
| AIFM2      | ENSG00000042286.14 | 4.135932453 | 4.305439566 | 6.2872468   |
| SLC25A12   | ENSG00000115840.13 | 4.15969737  | 4.798976883 | 5.151896414 |
| GHDC       | ENSG00000167925.15 | 4.31136846  | 4.928434838 | 5.199690379 |
| RNF44      | ENSG00000146083.11 | 5.769759066 | 5.038936736 | 5.720814483 |
| PCLAF      | ENSG00000166803.11 | 6.53672497  | 4.389533942 | 4.108941259 |
| WDR36      | ENSG00000134987.11 | 5.137941342 | 4.219460682 | 4.169694636 |
| RNF139     | ENSG00000170881.4  | 5.344891972 | 4.741916212 | 5.232682011 |
| RABGEF1    | ENSG00000154710.16 | 5.151606034 | 5.140342262 | 4.409900998 |
| NUDCD3     | ENSG00000015676.17 | 4.735352731 | 4.748154624 | 4.633706731 |
| RAB9A      | ENSG00000123595.7  | 4.387721668 | 4.761645974 | 4.906652636 |
| RSBN1L     | ENSG00000187257.15 | 4.265060874 | 4.280517351 | 4.144377875 |
| ITSN1      | ENSG00000205726.14 | 4.349027865 | 4.087551405 | 5.0388635   |
| AC245060.4 | ENSG00000272779.1  | 4.109252697 | 4.595147213 | 4.999551842 |
| TM2D2      | ENSG00000169490.16 | 4.254711755 | 4.545951947 | 4.28225452  |
| RRP12      | ENSG00000052749.13 | 6.853044481 | 4.902385124 | 4.741457319 |
| LCLAT1     | ENSG00000172954.13 | 4.319344085 | 4.560899611 | 4.922345559 |
| ZNF317     | ENSG00000130803.14 | 4.251338262 | 4.811918315 | 4.513829865 |
| GEMIN7     | ENSG00000142252.10 | 5.408250507 | 4.456853229 | 4.254447571 |
| CNTROB     | ENSG00000170037.13 | 5.131917317 | 4.191019153 | 4.380427005 |
| MOAP1      | ENSG00000165943.4  | 4.712907268 | 5.437851619 | 4.70276222  |
| PRPF38B    | ENSG00000134186.11 | 5.030776076 | 5.202197412 | 4.264667002 |
| CDC45      | ENSG00000093009.9  | 5.592903933 | 4.950789243 | 4.104512369 |
| BTBD10     | ENSG00000148925.10 | 4.01648043  | 4.838618934 | 5.178780353 |
| IFT20      | ENSG00000109083.13 | 5.628730455 | 5.333987933 | 5.275761917 |
| CCM2       | ENSG00000136280.15 | 4.063460667 | 5.630665676 | 4.439521868 |
| CES2       | ENSG00000172831.11 | 4.492752052 | 4.184838543 | 4.69966115  |
| BIVM       | ENSG00000134897.13 | 5.11684523  | 4.068297591 | 4.876613415 |
| UGGT2      | ENSG00000102595.19 | 4.895887149 | 4.525979966 | 4.075619866 |
| ARID5B     | ENSG00000150347.14 | 4.029719896 | 4.210978543 | 5.629967285 |
| FDX1       | ENSG00000137714.2  | 4.032283767 | 4.618219823 | 4.815827535 |
| NUP214     | ENSG00000126883.16 | 5.659662768 | 5.670818227 | 4.094195548 |
| RABEPK     | ENSG00000136933.16 | 5.64480084  | 5.912596371 | 4.097945752 |
| ZBTB11     | ENSG00000066422.4  | 4.632120529 | 4.437333229 | 4.091157172 |
| FEM1C      | ENSG00000145780.7  | 4.420452329 | 4.057194466 | 4.197724662 |
| VEZT       | ENSG00000028203.17 | 5.227086843 | 4.798688483 | 4.14198565  |
| RHBDF1     | ENSG00000007384.15 | 5.839687182 | 5.073517112 | 5.36156494  |

|          |                    |             |             |             |
|----------|--------------------|-------------|-------------|-------------|
| UBFD1    | ENSG00000103353.15 | 5.848649151 | 5.293691036 | 4.81113324  |
| SLC25A40 | ENSG00000075303.12 | 4.236035871 | 4.180871405 | 6.050393054 |
| HLA-H    | ENSG00000206341.7  | 5.237110573 | 5.17683504  | 5.293783188 |
| CCDC32   | ENSG00000128891.15 | 4.382521725 | 4.138285619 | 4.148851934 |
| PI4K2A   | ENSG00000155252.13 | 5.670683822 | 4.437355038 | 5.829565025 |
| SH3PXD2B | ENSG00000174705.12 | 4.817055918 | 6.657807994 | 4.054474601 |
| BIRC5    | ENSG00000089685.14 | 4.96041107  | 4.31012658  | 4.276488209 |
| MCM2     | ENSG00000073111.13 | 7.130561541 | 4.108604005 | 5.474633266 |
| CHURC1   | ENSG00000258289.8  | 4.171599871 | 4.508933305 | 4.417539706 |
| RPRD1B   | ENSG00000101413.11 | 4.931418301 | 4.34940204  | 4.538551602 |
| ARL14EP  | ENSG00000152219.4  | 4.547530372 | 4.854233644 | 5.918302208 |
| ELP1     | ENSG00000070061.14 | 5.336404619 | 5.409486926 | 4.06188581  |
| TMEM87B  | ENSG00000153214.9  | 4.06788439  | 5.566350248 | 6.080663027 |
| FMR1     | ENSG00000102081.13 | 5.187387576 | 4.649662673 | 5.265645703 |
| C16orf52 | ENSG00000185716.11 | 7.374815475 | 4.502620432 | 5.081962525 |
| RAB2B    | ENSG00000129472.13 | 4.149729899 | 4.234859104 | 5.096595543 |
| SUZ12P1  | ENSG00000264538.6  | 4.398437723 | 4.430886319 | 4.693959574 |
| SMIM29   | ENSG00000186577.12 | 4.201197735 | 4.442656472 | 4.707645621 |
| CDT1     | ENSG00000167513.8  | 5.602864611 | 4.084330527 | 5.220374845 |
| CSRP2    | ENSG00000175183.9  | 5.638384866 | 4.226661311 | 4.399490988 |
| RAB24    | ENSG00000169228.13 | 4.811809587 | 4.398030957 | 4.740632956 |
| LRP8     | ENSG00000157193.15 | 6.10919072  | 5.119397043 | 4.061093773 |
| VAPB     | ENSG00000124164.15 | 4.543074622 | 4.577944404 | 4.692468432 |
| CNOT6    | ENSG00000113300.11 | 4.892944939 | 4.040364333 | 4.909120295 |
| KAT7     | ENSG00000136504.11 | 4.866673393 | 4.596274573 | 5.53879335  |
| DOCK9    | ENSG00000088387.18 | 4.07983011  | 5.243917924 | 6.618290764 |
| URB1     | ENSG00000142207.6  | 4.917480411 | 4.837370245 | 4.625930126 |
| MTX3     | ENSG00000177034.14 | 5.229609934 | 4.235594079 | 4.443647718 |
| CDS2     | ENSG00000101290.13 | 4.056027449 | 5.518181092 | 4.674885761 |
| FRMD8    | ENSG00000126391.13 | 5.108674135 | 4.567247923 | 5.429924645 |
| NRM      | ENSG00000137404.14 | 4.876552224 | 4.113515799 | 4.287583972 |
| ZZZ3     | ENSG00000036549.12 | 5.121682266 | 4.087910387 | 5.596215678 |
| TESK1    | ENSG00000107140.15 | 4.497458082 | 4.080047053 | 4.527961699 |
| STAG1    | ENSG00000118007.12 | 5.515884576 | 4.61860179  | 4.086388002 |
| TRAF4    | ENSG00000076604.14 | 5.819336782 | 6.146271856 | 6.93299454  |
| EIF2B2   | ENSG00000119718.10 | 5.070673517 | 4.462845607 | 4.633837012 |
| TMEM98   | ENSG00000006042.11 | 4.253244775 | 6.222402898 | 5.759904835 |
| TRAM2    | ENSG00000065308.4  | 5.890903631 | 4.626772627 | 4.016608607 |
| RHOQ     | ENSG00000119729.11 | 4.715140074 | 7.324600838 | 7.623709245 |
| DERL2    | ENSG00000072849.10 | 5.359698601 | 4.107242077 | 4.778332279 |
| RMND5B   | ENSG00000145916.18 | 5.116393975 | 4.210721689 | 4.53650629  |
| RGS3     | ENSG00000138835.22 | 4.20491423  | 4.792296015 | 4.460315729 |
| MOSPD2   | ENSG00000130150.11 | 4.681977926 | 4.498050591 | 4.025730156 |
| NOL8     | ENSG00000198000.11 | 5.947939982 | 5.922745307 | 4.190629753 |
| FAM8A1   | ENSG00000137414.5  | 4.299546215 | 4.980801554 | 5.505320943 |
| INPP5K   | ENSG00000132376.19 | 5.347471126 | 4.646991554 | 4.453896626 |

|          |                    |             |             |             |
|----------|--------------------|-------------|-------------|-------------|
| MSH3     | ENSG00000113318.9  | 5.092451848 | 4.301867993 | 5.019398878 |
| CHAF1B   | ENSG00000159259.7  | 4.360566855 | 4.012259373 | 4.191025125 |
| POLE     | ENSG00000177084.16 | 5.433847748 | 4.69510791  | 4.03833133  |
| RPS6KB1  | ENSG00000108443.13 | 4.665449838 | 4.291848194 | 5.227163525 |
| DCAF15   | ENSG00000132017.10 | 5.68750475  | 5.186341205 | 4.733088817 |
| CCDC130  | ENSG00000104957.13 | 5.164173383 | 5.358304285 | 5.015055807 |
| MCM8     | ENSG00000125885.13 | 6.064366887 | 5.148573812 | 4.051256866 |
| BLCAP    | ENSG00000166619.12 | 5.421831949 | 5.58480667  | 5.529765624 |
| MAGOHB   | ENSG00000111196.9  | 5.282777527 | 4.191045004 | 5.368544045 |
| ELP5     | ENSG00000170291.14 | 6.449230641 | 4.308721126 | 5.254474395 |
| GPAT3    | ENSG00000138678.10 | 6.755663443 | 4.54134478  | 4.07633718  |
| INPP5B   | ENSG00000204084.12 | 4.250973884 | 4.396774024 | 4.268186008 |
| SLC15A4  | ENSG00000139370.11 | 4.615780274 | 4.906629808 | 6.602160633 |
| FAM3A    | ENSG00000071889.16 | 5.024566485 | 5.269180859 | 5.090793891 |
| LIG3     | ENSG00000005156.11 | 4.800793811 | 4.966234344 | 4.863179834 |
| NECTIN3  | ENSG00000177707.10 | 4.846578214 | 4.737314814 | 4.134292094 |
| B4GALT4  | ENSG00000121578.12 | 4.140021506 | 5.193010581 | 4.687188173 |
| HEATR5A  | ENSG00000129493.14 | 4.098630687 | 4.89052062  | 4.797944287 |
| CCND3    | ENSG00000112576.12 | 5.789282125 | 5.351855128 | 4.475246644 |
| DR1      | ENSG00000117505.12 | 4.527296532 | 4.125391088 | 4.239442847 |
| LAMB1    | ENSG00000091136.13 | 8.261647109 | 7.63429071  | 4.108761646 |
| PAM16    | ENSG00000217930.7  | 5.817154373 | 5.191888662 | 5.695363824 |
| BUB1B    | ENSG00000156970.12 | 5.710368446 | 4.93794813  | 4.046523687 |
| CARD19   | ENSG00000165233.17 | 6.001859845 | 6.835734065 | 5.10413942  |
| AARSD1   | ENSG00000266967.6  | 5.301819376 | 5.394328327 | 5.159399155 |
| LYSMD3   | ENSG00000176018.12 | 4.384594934 | 4.54628459  | 4.833868372 |
| SLC39A10 | ENSG00000196950.13 | 4.362678586 | 4.963478287 | 5.147553753 |
| TSEN54   | ENSG00000182173.12 | 4.30567704  | 4.462182377 | 4.551370337 |
| GRAMD4   | ENSG00000075240.16 | 4.088255262 | 6.398633522 | 4.877654913 |
| COMMD1   | ENSG00000173163.10 | 4.686828233 | 5.701349512 | 4.818984024 |
| RBM28    | ENSG00000106344.8  | 4.658129863 | 4.738350669 | 4.47888125  |
| KMT2B    | ENSG00000272333.5  | 5.010499673 | 5.458452647 | 4.868518077 |
| ALX1     | ENSG00000180318.3  | 4.726070314 | 4.273418363 | 5.126074226 |
| SNTB2    | ENSG00000168807.16 | 5.837138436 | 4.052310358 | 4.112343785 |
| TFAM     | ENSG00000108064.10 | 5.523170095 | 4.076076054 | 4.382048651 |
| MTHFD1L  | ENSG00000120254.15 | 5.814367688 | 5.479052455 | 5.492190236 |
| HADH     | ENSG00000138796.16 | 5.132368632 | 4.187321782 | 4.924661777 |
| TRAPPC8  | ENSG00000153339.13 | 4.392750876 | 5.301941033 | 4.441982779 |
| C6orf89  | ENSG00000198663.16 | 4.794807896 | 4.756386757 | 5.002647253 |
| NLGN2    | ENSG00000169992.9  | 5.529512544 | 4.516583559 | 4.029501664 |
| SLC22A18 | ENSG00000110628.13 | 4.088424767 | 6.997291922 | 6.353325323 |
| ATP2B4   | ENSG00000058668.14 | 6.330310958 | 6.020231363 | 4.462235013 |
| CCDC90B  | ENSG00000137500.9  | 4.872268821 | 4.58899073  | 5.264940647 |
| HOXB6    | ENSG00000108511.9  | 4.556456797 | 4.205825638 | 4.344631996 |
| NT5C     | ENSG00000125458.6  | 5.44070489  | 5.001148265 | 4.127356566 |
| SPDL1    | ENSG00000040275.16 | 6.087495875 | 4.613833193 | 4.108650434 |



|          |                    |             |             |             |
|----------|--------------------|-------------|-------------|-------------|
| AGK      | ENSG00000006530.15 | 4.71767886  | 4.527482519 | 4.47087784  |
| CERS5    | ENSG00000139624.12 | 4.222791439 | 5.323039577 | 4.239496033 |
| LRP1     | ENSG00000123384.13 | 4.427052444 | 6.057091935 | 4.100766994 |
| LRR14    | ENSG00000160959.7  | 4.694842282 | 4.26926279  | 4.571763957 |
| PANK4    | ENSG00000157881.13 | 4.212003516 | 4.327381796 | 4.955144608 |
| BDP1     | ENSG00000145734.18 | 4.526018628 | 4.024253099 | 4.321204842 |
| BBX      | ENSG00000114439.18 | 5.037270232 | 5.26939688  | 4.962254523 |
| PRR12    | ENSG00000126464.13 | 5.573883561 | 5.111484071 | 4.494018639 |
| CHST10   | ENSG00000115526.10 | 4.524213192 | 5.316474164 | 4.034936583 |
| ERG28    | ENSG00000133935.6  | 4.055977261 | 4.985651365 | 4.859769891 |
| SIRT6    | ENSG00000077463.14 | 5.412232287 | 5.416610557 | 4.573262554 |
| PPP6R2   | ENSG00000100239.15 | 4.741560862 | 5.910995055 | 5.92290514  |
| ZNF316   | ENSG00000205903.6  | 4.737859639 | 5.30110317  | 5.087243895 |
| STX16    | ENSG00000124222.22 | 6.893390548 | 6.512584408 | 5.891943679 |
| TRAF3IP2 | ENSG00000056972.18 | 4.144717202 | 5.011197325 | 4.532370071 |
| SMC2     | ENSG00000136824.18 | 5.973693806 | 5.459745034 | 3.977721301 |
| ACTR6    | ENSG00000075089.9  | 5.903703133 | 4.972630181 | 4.079450205 |
| POLA1    | ENSG00000101868.10 | 5.381531671 | 4.029368526 | 4.485538718 |
| TECPR1   | ENSG00000205356.9  | 4.058337601 | 5.152888355 | 4.883173705 |
| RASA1    | ENSG00000145715.14 | 4.844780335 | 4.305560132 | 5.569709194 |
| PRPF4    | ENSG00000136875.12 | 7.165474672 | 6.617608851 | 3.989716075 |
| SPG11    | ENSG00000104133.14 | 4.990814521 | 5.184137985 | 5.346170975 |
| MAML1    | ENSG00000161021.12 | 5.152637625 | 4.014742331 | 4.30761417  |
| HERPUD1  | ENSG00000051108.14 | 5.790718258 | 6.796114291 | 6.983401463 |
| ZCCHC3   | ENSG00000247315.3  | 5.325320982 | 5.297887827 | 3.969506044 |
| RITA1    | ENSG00000139405.15 | 5.686179167 | 5.358787661 | 3.98033632  |
| KDM5A    | ENSG00000073614.12 | 5.570241151 | 4.726239826 | 6.850737953 |
| TRPT1    | ENSG00000149743.13 | 5.066585609 | 4.873230731 | 4.904217419 |
| LAMA4    | ENSG00000112769.18 | 7.136466287 | 4.98132597  | 4.019632109 |
| SPPL2A   | ENSG00000138600.9  | 5.29792213  | 4.76568364  | 4.973492141 |
| UBXN2A   | ENSG00000173960.13 | 4.776615786 | 4.476284434 | 4.026437828 |
| LRR14    | ENSG00000171492.14 | 5.52747854  | 5.393259472 | 6.09540691  |
| UFSP2    | ENSG00000109775.10 | 5.003877732 | 4.330731446 | 4.881140638 |
| RMND1    | ENSG00000155906.16 | 4.771773565 | 4.782172014 | 4.25191874  |
| PGP      | ENSG00000184207.8  | 4.829226964 | 4.908294487 | 4.235451982 |
| EPB41    | ENSG00000159023.19 | 5.463890002 | 5.44718448  | 5.847872117 |
| FANCD2   | ENSG00000144554.10 | 5.238746826 | 4.74245614  | 4.115666954 |
| ENOSF1   | ENSG00000132199.18 | 4.26018101  | 5.835877921 | 4.005460978 |
| C17orf62 | ENSG00000178927.17 | 5.116312372 | 5.357516666 | 5.904005228 |
| BAZ1A    | ENSG00000198604.10 | 5.427889838 | 4.353814969 | 4.063699117 |
| NRIP1    | ENSG00000180530.10 | 5.631777718 | 4.246899971 | 4.779983313 |
| RNFT1    | ENSG00000189050.15 | 4.555182273 | 5.481526661 | 6.020070949 |
| MAD1L1   | ENSG00000002822.15 | 4.845549499 | 7.226547267 | 6.522964579 |
| SMPD1    | ENSG00000166311.9  | 4.084097495 | 5.73274307  | 5.981073361 |
| STAMBP   | ENSG00000124356.15 | 4.824581686 | 4.590339505 | 4.858086074 |
| VPS50    | ENSG00000004766.15 | 4.113505519 | 5.024046793 | 4.447086027 |

|          |                    |             |             |             |
|----------|--------------------|-------------|-------------|-------------|
| PEX16    | ENSG00000121680.15 | 5.580581565 | 5.463098701 | 5.642904091 |
| L3MBTL2  | ENSG00000100395.14 | 4.796000257 | 4.933625605 | 4.093230873 |
| PSMB10   | ENSG00000205220.11 | 4.607020224 | 4.035040049 | 5.233106471 |
| PCNX4    | ENSG00000126773.12 | 4.401595098 | 4.179488521 | 4.66041618  |
| KIAA1109 | ENSG00000138688.15 | 4.033809823 | 4.450137559 | 4.598693846 |
| PIAS3    | ENSG00000131788.15 | 5.862891307 | 5.590597724 | 4.032665091 |
| IFT22    | ENSG00000128581.15 | 4.844968897 | 4.376102558 | 3.992945591 |
| FAM222B  | ENSG00000173065.13 | 4.907209249 | 6.026536553 | 6.685315867 |
| PGM2     | ENSG00000169299.13 | 6.347390455 | 4.025897671 | 5.670226589 |
| NSL1     | ENSG00000117697.14 | 5.643720985 | 4.132705764 | 4.042728223 |
| METTL6   | ENSG00000206562.11 | 4.926214493 | 4.995656144 | 4.849615405 |
| TCIRG1   | ENSG00000110719.9  | 5.712477708 | 5.168853545 | 5.924874323 |
| MIB1     | ENSG00000101752.11 | 4.197821232 | 4.993215676 | 4.779514758 |
| C2CD5    | ENSG00000111731.12 | 4.914516159 | 4.234514209 | 4.343387106 |
| DNAJC4   | ENSG00000110011.13 | 4.281722436 | 4.304681639 | 5.522698655 |
| HMGB1P6  | ENSG00000259781.1  | 6.37124679  | 4.825914202 | 4.293946311 |
| LARS2    | ENSG00000011376.9  | 4.431554507 | 4.287326445 | 4.337042855 |
| DYNC2LI1 | ENSG00000138036.18 | 4.825704384 | 4.355129514 | 4.695190141 |
| WASHC2A  | ENSG00000099290.15 | 4.003397686 | 4.377107014 | 4.922248441 |
| KLHL18   | ENSG00000114648.11 | 5.073984866 | 4.380412548 | 4.043143181 |
| ZNF800   | ENSG00000048405.9  | 5.592641283 | 4.895347141 | 5.046711312 |
| C18orf25 | ENSG00000152242.10 | 4.904848769 | 4.91681167  | 4.209832997 |
| IFT46    | ENSG00000118096.7  | 5.687674566 | 4.083311776 | 5.241085324 |
| AP3S2    | ENSG00000157823.16 | 4.885098162 | 5.257134073 | 4.54569768  |
| LATS2    | ENSG00000150457.8  | 4.155417876 | 4.799462477 | 4.002426798 |
| MTMR1    | ENSG00000063601.16 | 5.22066611  | 4.413132479 | 4.301566609 |
| ARHGAP12 | ENSG00000165322.17 | 5.870355484 | 4.44071524  | 4.706147315 |
| ZNF777   | ENSG00000196453.7  | 4.625135002 | 4.061905308 | 4.426261109 |
| ZNF623   | ENSG00000183309.11 | 5.227020357 | 4.39793794  | 4.665339436 |
| MON2     | ENSG00000061987.15 | 4.678639519 | 5.117002095 | 5.491279956 |
| PDE12    | ENSG00000174840.8  | 4.921791028 | 4.43136562  | 4.173101881 |
| MON1B    | ENSG00000103111.14 | 5.160467706 | 5.215123432 | 5.459893512 |
| MVD      | ENSG00000167508.11 | 4.354169521 | 5.344377769 | 5.672529528 |
| PRPF38A  | ENSG00000134748.12 | 6.033961139 | 4.374417747 | 4.046879928 |
| PHF12    | ENSG00000109118.13 | 4.833861256 | 4.639251482 | 4.483432321 |
| TEAD1    | ENSG00000187079.16 | 5.617674687 | 7.045552293 | 4.964097449 |
| ISOC1    | ENSG00000066583.11 | 4.769388343 | 4.01239803  | 4.821246582 |
| PLCB3    | ENSG00000149782.11 | 5.128772218 | 5.21735207  | 4.009743248 |
| PTK7     | ENSG00000112655.15 | 4.134363214 | 4.512629454 | 4.838760438 |
| C1orf109 | ENSG00000116922.14 | 5.118049623 | 4.492302394 | 4.00497814  |
| PI4K2B   | ENSG00000038210.12 | 4.974913379 | 3.984749835 | 5.434424919 |
| DTNBP1   | ENSG00000047579.19 | 3.994101003 | 4.406632458 | 5.713386878 |
| CSRP1    | ENSG00000159176.13 | 5.210015325 | 4.475418808 | 5.697103133 |
| TATDN1   | ENSG00000147687.18 | 6.344724355 | 4.843839443 | 4.30325193  |
| YWHAH    | ENSG00000128245.14 | 6.390293466 | 7.57222499  | 7.253286796 |
| NNT-AS1  | ENSG00000248092.7  | 4.032169636 | 4.761414868 | 5.612869239 |

|           |                    |             |             |             |
|-----------|--------------------|-------------|-------------|-------------|
| PRPF39    | ENSG00000185246.17 | 4.031070403 | 3.980684607 | 4.428412488 |
| SPHK2     | ENSG00000063176.15 | 5.435097785 | 5.606817279 | 4.869339372 |
| C16orf70  | ENSG00000125149.11 | 4.314345592 | 4.087109609 | 4.362410217 |
| PIGW      | ENSG00000277161.1  | 4.862475707 | 5.008139341 | 4.374552877 |
| PMS2      | ENSG00000122512.14 | 4.816713171 | 5.250340974 | 4.586668241 |
| NFRKB     | ENSG00000170322.14 | 5.098779819 | 3.987876336 | 4.181857117 |
| KRI1      | ENSG00000129347.19 | 6.275150359 | 5.396316139 | 4.939369935 |
| ROBO1     | ENSG00000169855.19 | 5.652129225 | 5.53354235  | 4.843796203 |
| GNL3L     | ENSG00000130119.15 | 5.63363516  | 5.960487455 | 4.987746761 |
| UTP15     | ENSG00000164338.9  | 5.044761731 | 4.332623712 | 4.319913183 |
| PPP4R3A   | ENSG00000100796.17 | 5.371613324 | 5.195755864 | 4.00408166  |
| ACTR8     | ENSG00000113812.13 | 4.830959482 | 5.096832129 | 4.543868656 |
| CACTIN    | ENSG00000105298.13 | 4.348126102 | 4.586965973 | 4.182475257 |
| MRPL48    | ENSG00000175581.13 | 5.506162799 | 3.998076653 | 5.48371039  |
| BAG4      | ENSG00000156735.10 | 4.390082592 | 4.248604254 | 3.948888778 |
| CREBZF    | ENSG00000137504.13 | 5.218886111 | 4.162582613 | 5.152817063 |
| ZNF263    | ENSG00000006194.9  | 4.612272573 | 4.323555732 | 4.430298026 |
| NFKBIA    | ENSG00000100906.10 | 4.199841778 | 4.230531959 | 4.447445109 |
| TMEM129   | ENSG00000168936.10 | 5.19126063  | 4.715927499 | 6.941898847 |
| LINC01578 | ENSG00000272888.5  | 5.490881923 | 4.743069817 | 5.507807743 |
| IL1RAP    | ENSG00000196083.9  | 4.39184724  | 5.798970502 | 5.297487456 |
| STK11     | ENSG00000118046.14 | 4.938880156 | 3.952251218 | 5.149630294 |
| MPST      | ENSG00000128309.16 | 4.576046134 | 5.332619708 | 4.332327004 |
| C1GALT1   | ENSG00000106392.10 | 4.029373985 | 4.36208071  | 4.633122049 |
| TMEM184C  | ENSG00000164168.7  | 4.687406808 | 4.642019185 | 5.013689709 |
| KIF13B    | ENSG00000197892.12 | 3.948510178 | 4.787938785 | 5.9526678   |
| CYTH3     | ENSG00000008256.15 | 4.118440938 | 7.633094144 | 7.722476351 |
| MAN1A2    | ENSG00000198162.12 | 5.255394563 | 4.849398797 | 5.043323351 |
| RAB18     | ENSG00000099246.16 | 4.538698908 | 4.896535321 | 4.339486657 |
| BICD1     | ENSG00000151746.13 | 5.666418272 | 4.718442583 | 4.014407941 |
| HPS3      | ENSG00000163755.8  | 4.099316737 | 6.427378598 | 5.584353912 |
| B3GALNT2  | ENSG00000162885.12 | 5.501313956 | 3.94227356  | 4.420091911 |
| THEM6     | ENSG00000130193.7  | 5.101556799 | 4.163850965 | 4.427820028 |
| XPR1      | ENSG00000143324.13 | 4.91247725  | 4.737296959 | 4.510738338 |
| MKNK1     | ENSG00000079277.19 | 5.105626717 | 4.843914192 | 4.111276201 |
| POMT2     | ENSG00000009830.11 | 4.040952971 | 4.185674867 | 4.696106519 |
| KMT5B     | ENSG00000110066.14 | 4.648879811 | 4.211153119 | 5.673890459 |
| FAM210A   | ENSG00000177150.12 | 4.751312067 | 6.34600157  | 7.020292392 |
| SOX4      | ENSG00000124766.6  | 3.95285921  | 4.332601947 | 5.744158909 |
| TAF2      | ENSG00000064313.11 | 5.216935272 | 5.187694014 | 4.082458231 |
| PPP1R16A  | ENSG00000160972.9  | 4.873847709 | 4.285484232 | 4.837251935 |
| TEX2      | ENSG00000136478.7  | 3.987122772 | 6.018856687 | 6.246947254 |
| FAM83D    | ENSG00000101447.14 | 6.464851205 | 5.64458508  | 3.971329672 |
| OARD1     | ENSG00000124596.16 | 4.659883755 | 4.485401378 | 4.620977759 |
| MRPS2     | ENSG00000122140.10 | 5.865880504 | 6.866435543 | 6.08471192  |
| ERCC6L2   | ENSG00000182150.15 | 5.26482002  | 5.043023102 | 4.733239072 |

|         |                    |             |             |             |
|---------|--------------------|-------------|-------------|-------------|
| WDR3    | ENSG00000065183.15 | 6.636061064 | 5.318229993 | 4.020244919 |
| MEGF8   | ENSG00000105429.12 | 4.75086629  | 5.298626489 | 4.795988304 |
| MSANTD4 | ENSG00000170903.10 | 5.446461373 | 5.237979649 | 5.958343068 |
| DMAC1   | ENSG00000137038.7  | 5.536835617 | 3.993939654 | 4.490850593 |
| TRAFD1  | ENSG00000135148.11 | 5.113433946 | 4.229859394 | 3.996744585 |
| COMMD9  | ENSG00000110442.11 | 4.034171104 | 4.951971003 | 4.106863902 |
| HACL1   | ENSG00000131373.14 | 5.964350164 | 5.959607743 | 4.322684835 |
| PLEKHA8 | ENSG00000106086.18 | 4.058348714 | 4.997351854 | 4.075646553 |
| RANBP10 | ENSG00000141084.10 | 4.448439173 | 4.864935138 | 6.542467115 |
| ARID4B  | ENSG00000054267.21 | 5.277008076 | 3.936333743 | 4.49417367  |
| FNIP1   | ENSG00000217128.11 | 4.00652645  | 4.350201238 | 4.838689898 |
| FAN1    | ENSG00000198690.9  | 4.365926688 | 4.502183501 | 4.30844676  |
| C12orf4 | ENSG00000047621.11 | 4.43819604  | 4.570421044 | 6.380046724 |
| ERCC2   | ENSG00000104884.14 | 4.812773609 | 4.072912956 | 4.1194213   |
| WDR73   | ENSG00000177082.12 | 5.364817441 | 4.533870993 | 4.031240632 |
| EBP     | ENSG00000147155.10 | 5.212206537 | 4.943288302 | 4.144973254 |
| ZWILCH  | ENSG00000174442.11 | 5.227100179 | 4.649080902 | 4.130748061 |
| COG3    | ENSG00000136152.14 | 4.915065146 | 4.521306682 | 4.332096479 |
| OSGEP   | ENSG00000092094.10 | 4.152180607 | 4.310337018 | 4.646300882 |
| CAMKK2  | ENSG00000110931.18 | 4.578385166 | 4.159209742 | 5.153381422 |
| CENPM   | ENSG00000100162.14 | 4.670614389 | 4.071033476 | 4.498944901 |
| CUL5    | ENSG00000166266.13 | 4.407315479 | 3.933973358 | 4.818560057 |
| ARHGAP5 | ENSG00000100852.12 | 6.253434928 | 5.585606982 | 6.082396948 |
| DDX19A  | ENSG00000168872.16 | 6.826448464 | 5.573106342 | 4.829445978 |
| AEBP2   | ENSG00000139154.14 | 5.124267509 | 4.554089589 | 4.819365122 |
| SC5D    | ENSG00000109929.9  | 4.414874905 | 5.548837639 | 5.856413592 |
| STX18   | ENSG00000168818.9  | 4.476935648 | 4.254485649 | 6.365580324 |
| STX8    | ENSG00000170310.14 | 4.709590454 | 4.314220014 | 5.189222284 |
| CDCA7L  | ENSG00000164649.19 | 5.720820378 | 5.217565895 | 4.246128352 |
| PARVB   | ENSG00000188677.14 | 4.025716764 | 5.995391113 | 5.430324009 |
| TFIP11  | ENSG00000100109.16 | 4.96465662  | 5.604741837 | 5.950882289 |
| ZNF561  | ENSG00000171469.10 | 4.789467988 | 4.736136811 | 4.600581143 |
| FAM162A | ENSG00000114023.15 | 4.753343676 | 4.736690818 | 4.461716037 |
| MIOS    | ENSG00000164654.15 | 4.563190099 | 5.128664486 | 5.114986078 |
| ASB6    | ENSG00000148331.11 | 6.026242819 | 5.857048963 | 4.062294711 |
| CD2AP   | ENSG00000198087.7  | 4.544039935 | 5.401083823 | 5.604141496 |
| OPTN    | ENSG00000123240.16 | 4.060465673 | 5.338563816 | 5.883439692 |
| USP28   | ENSG00000048028.11 | 5.196670617 | 4.057295437 | 4.615588804 |
| SLC12A4 | ENSG00000124067.16 | 4.525299033 | 4.185893941 | 4.833504607 |
| TBC1D9  | ENSG00000109436.7  | 4.742849063 | 5.003125351 | 3.975392662 |
| FOS     | ENSG00000170345.9  | 4.461872549 | 5.989855546 | 4.412135316 |
| PCYT2   | ENSG00000185813.10 | 3.978233028 | 5.378699499 | 5.789164086 |
| SLF2    | ENSG00000119906.11 | 4.614507465 | 3.937506513 | 5.531955835 |
| SMAD2   | ENSG00000175387.15 | 4.595835033 | 4.721984654 | 4.086798571 |
| SYNRG   | ENSG00000275066.4  | 4.951830545 | 4.871099958 | 5.418916282 |
| VPS13C  | ENSG00000129003.15 | 4.378715196 | 4.986040082 | 5.150824719 |

|          |                    |             |             |             |
|----------|--------------------|-------------|-------------|-------------|
| TTLL5    | ENSG00000119685.19 | 4.470727878 | 4.01135627  | 4.916134212 |
| COG6     | ENSG00000133103.16 | 4.033804101 | 4.833928573 | 4.579427482 |
| EFL1     | ENSG00000140598.13 | 4.96466101  | 4.507206013 | 5.417110836 |
| DNTTIP2  | ENSG00000067334.13 | 4.819975566 | 4.605199381 | 4.055389503 |
| PTAR1    | ENSG00000188647.12 | 5.583272748 | 5.665648908 | 4.865310782 |
| ZYG11B   | ENSG00000162378.12 | 4.479390825 | 3.951954105 | 4.134050947 |
| UHRF2    | ENSG00000147854.16 | 5.767584814 | 4.934664724 | 4.199106397 |
| PEX19    | ENSG00000162735.18 | 5.349004732 | 5.259574069 | 5.746033234 |
| SMIM19   | ENSG00000176209.11 | 4.136134802 | 4.331036096 | 4.068288723 |
| SNHG15   | ENSG00000232956.8  | 4.915827374 | 5.908963058 | 4.735769379 |
| LMO4     | ENSG00000143013.12 | 5.322700969 | 4.758748163 | 4.652303322 |
| SDHAF1   | ENSG00000205138.3  | 4.967717954 | 3.963062653 | 4.284570148 |
| UCN2     | ENSG00000145040.3  | 6.335554555 | 4.966931284 | 6.114782719 |
| NFKB2    | ENSG00000077150.18 | 5.906287423 | 4.610906232 | 5.076247168 |
| C2orf69  | ENSG00000178074.5  | 3.919279575 | 4.584452336 | 5.232063904 |
| TRAK2    | ENSG00000115993.12 | 3.94721327  | 5.816595354 | 7.111933822 |
| SLC41A3  | ENSG00000114544.16 | 4.614542152 | 5.336468217 | 5.174987469 |
| IMPACT   | ENSG00000154059.9  | 4.378683346 | 5.085936582 | 3.913153188 |
| DPH7     | ENSG00000148399.12 | 4.831866574 | 5.116845313 | 4.421649932 |
| JPT2     | ENSG00000206053.12 | 4.69025346  | 4.299108996 | 4.162671941 |
| NBPF1    | ENSG00000219481.10 | 4.94304684  | 4.730213162 | 5.321763435 |
| CCNT1    | ENSG00000129315.10 | 5.438144903 | 4.671306623 | 3.936256601 |
| SLCO4A1  | ENSG00000101187.15 | 6.710118534 | 3.973428787 | 4.030460292 |
| GALK2    | ENSG00000156958.14 | 4.380753161 | 4.935510563 | 4.966844627 |
| RIOK2    | ENSG00000058729.10 | 4.399042626 | 4.160934204 | 3.932124512 |
| TRABD    | ENSG00000170638.9  | 5.07788533  | 5.227633566 | 5.012106286 |
| TACC1    | ENSG00000147526.19 | 4.44025004  | 5.62187269  | 6.140407232 |
| KRBOX4   | ENSG00000147121.15 | 4.684074019 | 4.028505377 | 3.913717887 |
| ACP5     | ENSG00000102575.10 | 5.059458493 | 6.251022127 | 6.943735909 |
| RALGDS   | ENSG00000160271.14 | 4.591752822 | 5.245804573 | 4.303497841 |
| MRPS16   | ENSG00000182180.13 | 5.091087268 | 4.362344963 | 4.530125366 |
| IDUA     | ENSG00000127415.12 | 4.184052901 | 4.402626242 | 5.210380686 |
| COMMD10  | ENSG00000145781.8  | 4.949778381 | 5.00203648  | 4.366279544 |
| RBM4B    | ENSG00000173914.11 | 4.503219266 | 4.020945525 | 4.092585607 |
| SPSB1    | ENSG00000171621.13 | 3.997500077 | 5.592013218 | 6.388043359 |
| C1orf52  | ENSG00000162642.13 | 5.137179754 | 4.466964103 | 3.997371327 |
| MTMR12   | ENSG00000150712.10 | 4.766226275 | 4.399846979 | 5.333837459 |
| MASTL    | ENSG00000120539.14 | 4.77771554  | 4.367530561 | 3.922717536 |
| STRN     | ENSG00000115808.11 | 4.804929779 | 4.597094382 | 4.671452574 |
| C19orf60 | ENSG00000006015.17 | 5.881619073 | 5.455889445 | 5.151493249 |
| TOR1B    | ENSG00000136816.15 | 5.305145499 | 4.979161507 | 3.939056167 |
| BRWD1    | ENSG00000185658.13 | 4.09995526  | 4.284967551 | 5.14762552  |
| ARL8B    | ENSG00000134108.12 | 4.389267519 | 5.156071801 | 4.775188507 |
| TYW3     | ENSG00000162623.15 | 5.780524039 | 4.984253122 | 3.936754932 |
| KIF4A    | ENSG00000090889.11 | 5.647025669 | 4.445866647 | 3.991455535 |
| CALCOCO1 | ENSG00000012822.15 | 4.637695972 | 4.890701748 | 4.514345309 |

|         |                    |             |             |             |
|---------|--------------------|-------------|-------------|-------------|
| AGFG1   | ENSG00000173744.17 | 4.558935055 | 5.647907201 | 4.738903086 |
| NDC1    | ENSG00000058804.11 | 6.172281866 | 5.074255004 | 3.968240832 |
| YPEL3   | ENSG00000090238.11 | 4.387219307 | 4.069176314 | 4.91628325  |
| MFSD11  | ENSG00000092931.11 | 4.014979278 | 4.010050568 | 4.948790715 |
| POLR2D  | ENSG00000144231.10 | 4.436618005 | 4.22506875  | 3.972770483 |
| VPS53   | ENSG00000141252.19 | 4.608113302 | 4.536843067 | 4.268928176 |
| ZDHHC17 | ENSG00000186908.14 | 4.580897555 | 4.355204317 | 5.406725591 |
| TANK    | ENSG00000136560.13 | 4.505658319 | 5.308112188 | 5.054615254 |
| PRDM4   | ENSG00000110851.11 | 4.921675628 | 4.697110127 | 3.939687169 |
| CPT2    | ENSG00000157184.6  | 5.395418896 | 4.937168162 | 3.981407974 |
| RAD1    | ENSG00000113456.18 | 4.810165903 | 4.097524757 | 4.448503736 |
| RYBP    | ENSG00000163602.10 | 4.224507669 | 3.921293661 | 4.461785572 |
| GAMT    | ENSG00000130005.12 | 5.412512986 | 5.769270959 | 4.979494554 |
| ADCY6   | ENSG00000174233.11 | 4.586301002 | 5.159630069 | 4.993827208 |
| TVP23B  | ENSG00000171928.13 | 5.963235761 | 4.88248757  | 5.060953495 |
| NARFL   | ENSG00000103245.13 | 5.148428448 | 4.669791367 | 4.787610293 |
| VAMP2   | ENSG00000220205.8  | 4.777149674 | 3.963961127 | 6.152094612 |
| E2F7    | ENSG00000165891.15 | 4.623543672 | 3.999954188 | 4.361205188 |
| SLC30A1 | ENSG00000170385.9  | 5.526613115 | 4.533559954 | 3.917946435 |
| CHD9    | ENSG00000177200.16 | 5.133275539 | 4.328975223 | 4.957953192 |
| ANKLE2  | ENSG00000176915.14 | 5.13099971  | 5.467006405 | 4.409322819 |
| UBN1    | ENSG00000118900.14 | 4.965143882 | 4.138065035 | 5.602171095 |
| ASH1L   | ENSG00000116539.12 | 5.286799269 | 4.897147323 | 4.245919584 |
| TIGAR   | ENSG00000078237.6  | 4.646698856 | 5.451444708 | 7.429296583 |
| MKRN2   | ENSG00000075975.15 | 4.779859736 | 4.580150348 | 4.818101574 |
| C5orf30 | ENSG00000181751.9  | 5.144947031 | 4.666982818 | 5.863281626 |
| SORBS3  | ENSG00000120896.13 | 6.006718191 | 5.076272057 | 6.697900516 |
| CPNE2   | ENSG00000140848.16 | 4.010928015 | 4.043056419 | 4.57667729  |
| PPIL4   | ENSG00000131013.3  | 5.290695973 | 4.69525746  | 4.076651116 |
| PALB2   | ENSG00000083093.9  | 4.761033273 | 4.505300388 | 3.924845445 |
| UBA6    | ENSG00000033178.12 | 4.435280552 | 4.499926042 | 4.464359386 |
| RHOBTB2 | ENSG00000008853.16 | 4.461848551 | 4.667443652 | 4.591425967 |
| EVA1B   | ENSG00000142694.6  | 5.150238335 | 4.13445718  | 4.522801154 |
| NAGA    | ENSG00000198951.11 | 3.900884227 | 5.150280521 | 5.566440136 |
| IGSF8   | ENSG00000162729.13 | 4.683505143 | 8.078018843 | 7.086099663 |
| PTPN2   | ENSG00000175354.18 | 4.891640737 | 4.8498255   | 4.291554409 |
| ZCCHC10 | ENSG00000155329.11 | 4.586166911 | 3.906086662 | 4.215442379 |
| MSI2    | ENSG00000153944.10 | 5.321586819 | 5.676568826 | 6.517848691 |
| FIGNL1  | ENSG00000132436.11 | 4.457427968 | 5.464141302 | 5.94915657  |
| CCDC71L | ENSG00000253276.2  | 4.54941493  | 5.342381078 | 4.076547113 |
| XRCC1   | ENSG00000073050.11 | 5.331703255 | 3.893113884 | 4.489018648 |
| AFTPH   | ENSG00000119844.15 | 5.335037405 | 5.052129084 | 4.998894995 |
| UTP23   | ENSG00000147679.11 | 5.017361668 | 3.899561979 | 3.923065449 |
| UHRF1   | ENSG00000276043.4  | 6.671385983 | 5.031165559 | 4.040814058 |
| BTN2A1  | ENSG00000112763.15 | 3.946399633 | 4.607846737 | 4.964068438 |
| CEP131  | ENSG00000141577.13 | 4.098107006 | 5.064405904 | 5.475457541 |

|          |                    |             |             |             |
|----------|--------------------|-------------|-------------|-------------|
| SLC37A4  | ENSG00000137700.17 | 5.09151909  | 4.185685767 | 4.01819154  |
| RALB     | ENSG00000144118.13 | 4.664251914 | 5.372105285 | 5.265350883 |
| NSF      | ENSG00000073969.18 | 4.072667931 | 3.905956951 | 4.325111043 |
| ZNF142   | ENSG00000115568.15 | 4.297503806 | 4.474990383 | 3.968390211 |
| ABHD17B  | ENSG00000107362.13 | 5.522452343 | 5.034759598 | 4.016132149 |
| APOL2    | ENSG00000128335.13 | 4.509993721 | 6.374120696 | 5.545957847 |
| MSH6     | ENSG00000116062.14 | 5.803932088 | 5.192399873 | 4.366050806 |
| ZNF274   | ENSG00000171606.17 | 4.504968303 | 4.592107484 | 4.231446448 |
| RAP2C    | ENSG00000123728.9  | 4.923611148 | 4.622497824 | 4.240989318 |
| ITGAE    | ENSG00000083457.11 | 5.021161209 | 4.258004303 | 4.220102355 |
| SDHAF3   | ENSG00000196636.7  | 4.942064345 | 5.721168007 | 4.067597838 |
| TIMM22   | ENSG00000177370.4  | 4.594482811 | 3.925953572 | 4.146320697 |
| PDCD4    | ENSG00000150593.17 | 6.131619156 | 4.815548307 | 5.82067721  |
| AK6      | ENSG00000085231.13 | 5.557845951 | 4.017327491 | 5.454637228 |
| TMEM39A  | ENSG00000176142.12 | 4.348971573 | 4.859535013 | 4.122982074 |
| BNIP3    | ENSG00000176171.11 | 6.044998101 | 4.039056944 | 5.186715753 |
| SLC35E2B | ENSG00000189339.11 | 4.705643518 | 4.529737115 | 4.885838041 |
| CASKIN2  | ENSG00000177303.9  | 4.133018495 | 3.917372204 | 4.559240802 |
| MBNL2    | ENSG00000139793.18 | 5.31680446  | 4.490007582 | 5.477754553 |
| CARNMT1  | ENSG00000156017.12 | 4.372217806 | 4.796366554 | 3.882936055 |
| NCK1     | ENSG00000158092.6  | 4.294055168 | 4.547972194 | 4.101405696 |
| ORC4     | ENSG00000115947.13 | 4.301633178 | 4.760440584 | 4.754182287 |
| PSKH1    | ENSG00000159792.9  | 4.694357277 | 3.960404635 | 4.802517989 |
| ORC3     | ENSG00000135336.14 | 4.926013039 | 4.610626574 | 3.896728492 |
| TBCC     | ENSG00000124659.6  | 4.976878528 | 5.161883153 | 4.780647422 |
| RAB28    | ENSG00000157869.14 | 4.902971888 | 4.105410556 | 6.193896892 |
| RUSC1    | ENSG00000160753.15 | 5.683611859 | 4.387299637 | 3.891021035 |
| SLC36A1  | ENSG00000123643.12 | 4.038629261 | 4.350892285 | 4.110249264 |
| UBIAD1   | ENSG00000120942.13 | 4.779197121 | 4.517542963 | 4.381049613 |
| SCRN2    | ENSG00000141295.13 | 4.855410993 | 4.746464974 | 4.690764342 |
| TSC1     | ENSG00000165699.13 | 4.584509881 | 5.790823388 | 4.247469131 |
| PRPF18   | ENSG00000165630.13 | 5.392822645 | 4.641853236 | 5.136684172 |
| PKMYT1   | ENSG00000127564.16 | 5.435114117 | 4.580334964 | 3.987912191 |
| MDFIC    | ENSG00000135272.10 | 4.80774445  | 5.015782407 | 4.627560092 |
| CCDC84   | ENSG00000186166.8  | 4.360165402 | 3.952191636 | 4.52525205  |
| TES      | ENSG00000135269.17 | 4.481982563 | 5.06115081  | 5.311440501 |
| TMEM57   | ENSG00000204178.9  | 4.925470869 | 4.386127358 | 4.57095441  |
| DGCR2    | ENSG00000070413.19 | 3.969874533 | 5.339618558 | 5.076455957 |
| ITPA     | ENSG00000125877.12 | 6.870195279 | 6.313599247 | 4.026158723 |
| CRYZL1   | ENSG00000205758.11 | 4.417498479 | 4.611272984 | 5.267012455 |
| CYP27A1  | ENSG00000135929.8  | 3.92187703  | 5.767434806 | 7.108747273 |
| CRLS1    | ENSG00000088766.11 | 4.828837524 | 4.660614427 | 4.029297156 |
| ABCA2    | ENSG00000107331.16 | 4.786987162 | 5.391271821 | 5.449027784 |
| PAQR4    | ENSG00000162073.13 | 4.467047906 | 4.609447083 | 3.985312084 |
| JOSD2    | ENSG00000161677.11 | 5.4999392   | 6.049777662 | 4.470911405 |
| FRMD6    | ENSG00000139926.15 | 5.870135579 | 4.566060082 | 4.864881441 |

|          |                    |             |             |             |
|----------|--------------------|-------------|-------------|-------------|
| TIMM29   | ENSG00000142444.6  | 5.399872352 | 4.56460239  | 4.430119357 |
| AGPAT5   | ENSG00000155189.11 | 4.250227729 | 3.949674656 | 5.083361087 |
| SLC27A4  | ENSG00000167114.12 | 5.873083419 | 6.281607509 | 3.902940515 |
| GTF2IRD1 | ENSG00000006704.10 | 4.521375858 | 4.297382711 | 3.889698113 |
| UBE3B    | ENSG00000151148.13 | 4.759161753 | 4.504377009 | 3.927390607 |
| SZT2     | ENSG00000198198.15 | 4.869981574 | 4.945573632 | 4.374802856 |
| TLNRD1   | ENSG00000140406.3  | 3.901902868 | 5.069359641 | 7.628314226 |
| PCGF1    | ENSG00000115289.13 | 4.754157735 | 5.109678223 | 4.735145403 |
| DCUN1D1  | ENSG00000043093.13 | 3.884105033 | 4.78711749  | 4.57817042  |
| RPA3     | ENSG00000106399.11 | 5.497916568 | 5.216827247 | 3.935633628 |
| EMG1     | ENSG00000126749.14 | 5.783242502 | 4.283260506 | 4.374236699 |
| CLN5     | ENSG00000102805.14 | 4.136718526 | 3.884446671 | 4.428029942 |
| GOLPH3L  | ENSG00000143457.10 | 5.025887094 | 4.70995745  | 4.513460749 |
| PHYKPL   | ENSG00000175309.14 | 4.881641031 | 4.344628022 | 4.279649699 |
| CDC42BPA | ENSG00000143776.18 | 5.344535372 | 3.849426362 | 5.142136047 |
| COQ8A    | ENSG00000163050.16 | 6.034705397 | 4.130969003 | 4.171316223 |
| CFL2     | ENSG00000165410.14 | 4.718246777 | 4.083266554 | 5.322784595 |
| FAM199X  | ENSG00000123575.8  | 4.927347912 | 5.210289718 | 5.054527294 |
| SPECC1   | ENSG00000128487.16 | 3.947986854 | 4.396633564 | 5.331966437 |
| HERPUD2  | ENSG00000122557.9  | 4.68535152  | 5.283209483 | 4.922114134 |
| TTC19    | ENSG00000011295.15 | 4.749485102 | 4.029659886 | 4.705843936 |
| CCNA2    | ENSG00000145386.9  | 6.479841717 | 4.26286878  | 4.025373338 |
| CCDC51   | ENSG00000164051.13 | 4.94085733  | 5.747466297 | 4.528620287 |
| ZBED4    | ENSG00000100426.6  | 4.014482135 | 4.237450263 | 4.57216499  |
| IRF2BP1  | ENSG00000170604.4  | 6.176740927 | 3.848421546 | 4.650028522 |
| RUNDC1   | ENSG00000198863.7  | 4.846526858 | 4.599246564 | 4.433748706 |
| ALKBH6   | ENSG00000239382.10 | 4.606269649 | 5.083513516 | 4.564545857 |
| ASCC3    | ENSG00000112249.13 | 5.117208721 | 5.043140605 | 4.618359761 |
| CMC2     | ENSG00000103121.8  | 4.993565737 | 5.315905956 | 5.845199774 |
| RECQL4   | ENSG00000160957.12 | 5.716691992 | 4.514719415 | 4.050094181 |
| PTRHD1   | ENSG00000184924.5  | 5.331834474 | 4.546964288 | 3.873957072 |
| RPS6KC1  | ENSG00000136643.11 | 5.301131691 | 4.185919057 | 3.906190781 |
| ZFP64    | ENSG00000020256.19 | 4.889987317 | 3.941404554 | 5.216965324 |
| INO80C   | ENSG00000153391.15 | 3.948698964 | 4.342652101 | 3.959524017 |
| LMBRD1   | ENSG00000168216.10 | 4.534541704 | 4.442580173 | 4.950886506 |
| CXorf40B | ENSG00000197021.8  | 4.795107683 | 5.309886076 | 4.824088094 |
| C19orf66 | ENSG00000130813.17 | 4.381255399 | 5.441657588 | 4.311099646 |
| SRRD     | ENSG00000100104.13 | 4.556957748 | 5.156422916 | 4.714235726 |
| NR2F2    | ENSG00000185551.14 | 6.079689765 | 4.902247711 | 4.175317952 |
| RABGGTA  | ENSG00000100949.14 | 4.353983779 | 4.170751486 | 4.278220321 |
| TKFC     | ENSG00000149476.15 | 5.600585685 | 4.514702006 | 5.249178927 |
| SMIM12   | ENSG00000163866.8  | 5.082136849 | 4.363520486 | 4.201118603 |
| AP4M1    | ENSG00000221838.9  | 4.428915785 | 4.002921459 | 3.928607611 |
| RBPJ     | ENSG00000168214.20 | 6.291458123 | 4.199494755 | 5.69586626  |
| NHLRC3   | ENSG00000188811.13 | 4.001122163 | 5.392821726 | 5.085767574 |
| MED13L   | ENSG00000123066.7  | 4.622719083 | 4.174487834 | 5.301370699 |



|            |                    |             |             |             |
|------------|--------------------|-------------|-------------|-------------|
| GABPA      | ENSG00000154727.10 | 4.829332733 | 4.268418712 | 4.39322499  |
| BMI1       | ENSG00000168283.13 | 6.002578826 | 4.760599368 | 6.289919853 |
| LINC00888  | ENSG00000240024.5  | 4.34490103  | 5.190695519 | 4.458026296 |
| BCL10      | ENSG00000142867.12 | 4.394714632 | 4.393707444 | 4.363232668 |
| HAUS6      | ENSG00000147874.10 | 6.23554924  | 4.706495387 | 3.859746707 |
| PPP2R1B    | ENSG00000137713.15 | 4.801458822 | 4.12013737  | 4.71265601  |
| CTDP1      | ENSG00000060069.16 | 4.125931813 | 5.165763247 | 4.025496047 |
| RNMT       | ENSG00000101654.17 | 4.989239907 | 6.100859505 | 6.307051177 |
| ZNF252P    | ENSG00000196922.10 | 4.996721011 | 4.126891771 | 4.795191694 |
| PQLC1      | ENSG00000122490.18 | 3.995603277 | 4.45498069  | 4.154977943 |
| TCTN2      | ENSG00000168778.11 | 4.436330132 | 3.864665594 | 4.205143027 |
| COG7       | ENSG00000168434.12 | 4.527290521 | 4.23556236  | 4.245855183 |
| KCTD3      | ENSG00000136636.12 | 6.396464128 | 4.076559161 | 4.051567791 |
| LINC01278  | ENSG00000235437.7  | 3.89930909  | 5.206859239 | 5.375625214 |
| RIPK2      | ENSG00000104312.7  | 4.728206828 | 4.591315216 | 4.444696387 |
| NDUFAF5    | ENSG00000101247.17 | 4.478511831 | 4.778034233 | 3.850496274 |
| ZNF276     | ENSG00000158805.11 | 4.371117998 | 4.316850762 | 4.304083429 |
| HABP4      | ENSG00000130956.13 | 3.962659766 | 5.754530195 | 5.627625145 |
| POLA2      | ENSG00000014138.8  | 5.379526098 | 4.271403982 | 3.932657141 |
| CTU2       | ENSG00000174177.12 | 5.033495939 | 4.983106715 | 4.809520823 |
| ZC3H4      | ENSG00000130749.9  | 5.783159935 | 4.180997589 | 4.804159598 |
| TBC1D10A   | ENSG00000099992.15 | 3.95217336  | 5.316242535 | 5.82990058  |
| AC132008.2 | ENSG00000214135.8  | 3.931297178 | 4.455646647 | 5.264625433 |
| TTC14      | ENSG00000163728.10 | 3.924234609 | 4.271788307 | 5.276607615 |
| SH3BP2     | ENSG00000087266.15 | 4.580516336 | 3.975991755 | 5.603437806 |
| UBXN7      | ENSG00000163960.11 | 4.502400808 | 4.968499539 | 4.534253143 |
| LMTK2      | ENSG00000164715.5  | 4.12667629  | 4.56462343  | 4.362420305 |
| SLC9A1     | ENSG00000090020.10 | 4.328118113 | 4.655931405 | 4.476843532 |
| ZC3H11A    | ENSG00000058673.16 | 4.84141518  | 5.166825736 | 5.138731477 |
| FAM114A2   | ENSG00000055147.18 | 4.076610149 | 3.943111349 | 4.445810413 |
| AK1        | ENSG00000106992.17 | 5.041950053 | 4.977491381 | 3.892315583 |
| HSPBAP1    | ENSG00000169087.10 | 4.130357994 | 4.538384524 | 4.40596974  |
| RBSN       | ENSG00000131381.12 | 4.461592395 | 4.538002759 | 4.163018544 |
| SNX13      | ENSG00000071189.21 | 4.31999072  | 4.888116166 | 4.675743864 |
| PLEKHF2    | ENSG00000175895.3  | 3.904891653 | 5.060553569 | 4.103451122 |
| DOT1L      | ENSG00000104885.17 | 5.165420128 | 4.646931909 | 6.069052313 |
| PEX1       | ENSG00000127980.15 | 4.079951526 | 4.52981374  | 4.555470676 |
| RP2        | ENSG00000102218.5  | 3.982446569 | 4.715101919 | 3.868700638 |
| NUDT9      | ENSG00000170502.12 | 4.032570853 | 5.34566285  | 4.966660945 |
| CSGALNACT2 | ENSG00000169826.7  | 4.298079147 | 3.988748217 | 4.339815326 |
| FAHD2A     | ENSG00000115042.9  | 3.991972195 | 5.633725501 | 4.41794849  |
| HMBOX1     | ENSG00000147421.17 | 4.003850604 | 5.965839446 | 4.13969941  |
| ADNP2      | ENSG00000101544.8  | 4.449233268 | 5.023620544 | 3.944434233 |
| FBXW2      | ENSG00000119402.16 | 5.245265683 | 5.773919559 | 3.92179699  |
| PURB       | ENSG00000146676.8  | 5.529190511 | 5.664281098 | 5.129631937 |
| SV2A       | ENSG00000159164.9  | 5.848779021 | 5.178135471 | 5.926235904 |

|         |                    |             |             |             |
|---------|--------------------|-------------|-------------|-------------|
| NXPE3   | ENSG00000144815.15 | 5.539675166 | 5.089776518 | 4.785948768 |
| OSBPL11 | ENSG00000144909.7  | 4.933725809 | 3.85639201  | 3.850799237 |
| ANKRD39 | ENSG00000213337.8  | 3.930259593 | 5.200569036 | 7.13765948  |
| THAP7   | ENSG00000184436.11 | 4.329081303 | 4.043030457 | 3.908371009 |
| COQ6    | ENSG00000119723.16 | 4.09197004  | 4.006718656 | 4.734608295 |
| TAF4    | ENSG00000130699.18 | 4.71977189  | 3.880753264 | 4.885819019 |
| TMEM218 | ENSG00000150433.9  | 4.426068462 | 4.028909588 | 4.233951917 |
| DCP1A   | ENSG00000272886.5  | 4.968558153 | 4.406659502 | 3.857497172 |
| CCDC91  | ENSG00000123106.10 | 5.152335796 | 5.636847193 | 4.714630181 |
| ATR     | ENSG00000175054.14 | 4.85160888  | 4.973277643 | 3.970276295 |
| KLHL20  | ENSG00000076321.10 | 5.022427289 | 4.073421117 | 3.867301682 |
| SLC35F6 | ENSG00000213699.8  | 5.521017572 | 6.159893438 | 5.186216395 |
| JMJD1C  | ENSG00000171988.18 | 5.138989595 | 4.483646397 | 5.34411874  |
| HAUS4   | ENSG00000092036.18 | 5.236027845 | 3.970391314 | 4.725379317 |
| TARBP1  | ENSG00000059588.9  | 5.094667148 | 3.818423143 | 4.731204294 |
| ZNF271P | ENSG00000257267.3  | 4.076334856 | 5.158766697 | 4.502504953 |
| SETD3   | ENSG00000183576.12 | 5.549720728 | 6.435043186 | 3.870544004 |
| ABCB7   | ENSG00000131269.15 | 4.617076324 | 4.77131253  | 4.206707017 |
| GCDH    | ENSG00000105607.12 | 4.878003306 | 4.718642068 | 4.510893828 |
| CHCHD6  | ENSG00000159685.10 | 4.054373255 | 6.978808834 | 8.397286824 |
| FUZ     | ENSG00000010361.13 | 5.93131755  | 4.462537155 | 4.135928729 |
| TWIST1  | ENSG00000122691.12 | 5.463680804 | 5.591508595 | 6.392570756 |
| SEC24B  | ENSG00000138802.11 | 4.987657285 | 4.458934748 | 5.395774671 |
| CHEK1   | ENSG00000149554.12 | 6.022677659 | 4.000181223 | 4.295441627 |
| AKAP1   | ENSG00000121057.12 | 5.604503196 | 5.035143773 | 5.719647361 |
| LNPEP   | ENSG00000113441.15 | 4.315988554 | 4.00201117  | 4.807526242 |
| SMUG1   | ENSG00000123415.15 | 5.70774285  | 5.373427625 | 4.461119622 |
| TANGO2  | ENSG00000183597.15 | 4.078848502 | 6.852062812 | 6.413991768 |
| DSCC1   | ENSG00000136982.5  | 5.889562932 | 3.815652028 | 4.153067503 |
| YTHDF3  | ENSG00000185728.16 | 4.022800552 | 6.117676817 | 4.117696028 |
| TRIP4   | ENSG00000103671.9  | 4.71044198  | 4.954206479 | 4.656199489 |
| RIOX2   | ENSG00000170854.17 | 5.14350616  | 5.076236946 | 5.063740902 |
| SHQ1    | ENSG00000144736.13 | 5.571063561 | 4.647814282 | 3.830269703 |
| FERMT2  | ENSG00000073712.14 | 4.685084398 | 4.770848855 | 4.01296257  |
| CNPY4   | ENSG00000166997.7  | 5.273329647 | 5.772259085 | 3.917944893 |
| RNGTT   | ENSG00000111880.15 | 4.44487466  | 3.848225033 | 3.953602665 |
| CTBP2   | ENSG00000175029.16 | 6.847724407 | 5.529790419 | 5.950254234 |
| XXYL1   | ENSG00000173950.15 | 4.389124558 | 3.9271134   | 5.225441367 |
| GTF2H3  | ENSG00000111358.13 | 6.767245375 | 4.669772476 | 4.341785047 |
| NCOA2   | ENSG00000140396.12 | 3.826326793 | 4.548098107 | 4.894635046 |
| ZMYND11 | ENSG00000015171.19 | 4.945903447 | 4.033554855 | 4.974633314 |
| GPN3    | ENSG00000111231.8  | 6.057926178 | 5.379952496 | 3.945387644 |
| MIA     | ENSG00000261857.6  | 7.878148615 | 7.031837666 | 6.14440798  |
| ZFYVE19 | ENSG00000166140.17 | 4.81654191  | 4.659882181 | 4.382235969 |
| ARMC6   | ENSG00000105676.13 | 6.490662207 | 5.059081587 | 4.436761468 |
| SMNDC1  | ENSG00000119953.12 | 5.219895507 | 4.109443647 | 4.751914039 |

|          |                    |             |             |             |
|----------|--------------------|-------------|-------------|-------------|
| CEP170B  | ENSG00000099814.15 | 3.98746614  | 5.371851364 | 3.965115649 |
| ZNRD1    | ENSG00000066379.14 | 5.001348046 | 4.431924487 | 4.786060833 |
| POPDC3   | ENSG00000132429.9  | 6.217542676 | 5.52550879  | 3.969463186 |
| NAF1     | ENSG00000145414.8  | 4.865262964 | 3.845659038 | 4.384952242 |
| DHX35    | ENSG00000101452.14 | 4.23447837  | 3.846998374 | 3.971324558 |
| HES1     | ENSG00000114315.3  | 5.459216148 | 5.705248442 | 3.90441108  |
| PTPN9    | ENSG00000169410.9  | 4.367721764 | 5.037649904 | 4.111000479 |
| KATNBL1  | ENSG00000134152.10 | 4.686930313 | 5.566590795 | 4.316839044 |
| CMTM4    | ENSG00000183723.12 | 4.123730774 | 3.994547446 | 5.375413511 |
| BTF3L4   | ENSG00000134717.17 | 5.448856901 | 3.913041072 | 4.027842179 |
| MKS1     | ENSG00000011143.16 | 4.361126665 | 4.342627398 | 4.414846975 |
| ZNF398   | ENSG00000197024.8  | 3.997625234 | 3.815398139 | 3.86821033  |
| MRPS36   | ENSG00000134056.11 | 5.391276702 | 4.198816098 | 5.186954152 |
| REV3L    | ENSG00000009413.15 | 3.854587055 | 4.513056232 | 4.18974313  |
| NADK2    | ENSG00000152620.12 | 4.651609559 | 4.238991892 | 4.767501272 |
| TMEM268  | ENSG00000157693.14 | 4.243346992 | 5.705560604 | 6.501475066 |
| USP3     | ENSG00000140455.16 | 4.986417146 | 4.627417734 | 4.83191028  |
| RN7SL2   | ENSG00000274012.1  | 6.765800393 | 5.44846348  | 7.076333387 |
| SCMH1    | ENSG00000010803.16 | 4.711757    | 3.933109054 | 4.894384651 |
| CDYL     | ENSG00000153046.17 | 4.281693527 | 5.394281657 | 7.370677582 |
| KIAA1143 | ENSG00000163807.5  | 4.760470625 | 3.973335666 | 3.865056893 |
| ABHD5    | ENSG00000011198.7  | 4.692807975 | 4.247914056 | 3.912058423 |
| RSPRY1   | ENSG00000159579.13 | 4.854099452 | 4.179731101 | 4.57741773  |
| HEATR6   | ENSG00000068097.14 | 4.934301212 | 4.392380224 | 4.39820486  |
| EXOSC5   | ENSG00000077348.8  | 6.545032739 | 5.109555457 | 4.614930436 |
| ZNF428   | ENSG00000131116.11 | 5.224019856 | 3.859707424 | 6.133635888 |
| CAPN10   | ENSG00000142330.19 | 3.841453721 | 4.63315492  | 4.589785356 |
| HINT2    | ENSG00000137133.10 | 5.165725935 | 4.406084913 | 4.272612966 |
| TCEAL1   | ENSG00000172465.13 | 3.86868785  | 5.321600857 | 5.133783064 |
| SLC30A6  | ENSG00000152683.14 | 4.645854039 | 4.953010876 | 4.160010896 |
| RSAD1    | ENSG00000136444.9  | 5.377873312 | 5.081441189 | 5.724849707 |
| TRIM11   | ENSG00000154370.15 | 5.038168753 | 4.194870175 | 4.306257499 |
| ZCCHC14  | ENSG00000140948.11 | 4.444361104 | 5.564201124 | 5.551563394 |
| DDX24    | ENSG00000089737.16 | 5.510301561 | 5.297468591 | 4.066039961 |
| CASP7    | ENSG00000165806.19 | 5.431790714 | 4.083084697 | 4.004792769 |
| HOOK3    | ENSG00000168172.8  | 3.948567757 | 4.265098152 | 4.921447275 |
| AXIN1    | ENSG00000103126.14 | 4.464639998 | 4.224684353 | 4.761354704 |
| HOXC10   | ENSG00000180818.4  | 6.742911204 | 4.550717612 | 4.817889818 |
| NUMB     | ENSG00000133961.19 | 4.660351507 | 4.8186553   | 5.943344841 |
| BRPF3    | ENSG00000096070.19 | 4.051971449 | 3.920576736 | 4.387704132 |
| ZNF12    | ENSG00000164631.18 | 4.338918596 | 5.040047839 | 4.85231419  |
| MUTYH    | ENSG00000132781.17 | 4.823170531 | 3.967732488 | 4.042944996 |
| KIFC2    | ENSG00000167702.11 | 3.917375282 | 5.339352706 | 4.960668942 |
| TRIM41   | ENSG00000146063.19 | 4.942568953 | 3.844296703 | 4.44016497  |
| RNF25    | ENSG00000163481.7  | 4.46040243  | 4.815079157 | 3.889344235 |
| DNAJB9   | ENSG00000128590.4  | 3.911469007 | 5.229726874 | 5.698257244 |

|            |                    |             |             |             |
|------------|--------------------|-------------|-------------|-------------|
| GTF2E1     | ENSG00000153767.9  | 4.071409813 | 4.651904942 | 3.902873432 |
| ZNF326     | ENSG00000162664.16 | 5.103099803 | 4.785686085 | 3.982194027 |
| AC084033.3 | ENSG00000257698.1  | 4.766442359 | 4.041034582 | 6.740128625 |
| NVL        | ENSG00000143748.17 | 5.267867933 | 3.98914864  | 4.121654871 |
| GCSH       | ENSG00000140905.10 | 5.166210254 | 4.799876602 | 4.218563102 |
| TMEM167B   | ENSG00000215717.5  | 4.352526214 | 4.720892848 | 4.986614543 |
| TEPSIN     | ENSG00000167302.10 | 4.389212923 | 5.296450287 | 5.267853212 |
| CTNS       | ENSG00000040531.14 | 4.366485373 | 4.331580645 | 3.833140597 |
| RAB4B      | ENSG00000167578.17 | 4.636067773 | 4.988930113 | 5.351021307 |
| GTPBP3     | ENSG00000130299.16 | 5.248587841 | 4.848601033 | 4.025542    |
| CMTM7      | ENSG00000153551.13 | 5.527570921 | 4.465893333 | 6.041358928 |
| LGMN       | ENSG00000100600.14 | 4.768246696 | 5.870722077 | 3.942544968 |
| NEK9       | ENSG00000119638.12 | 3.808392744 | 4.945439051 | 3.964829664 |
| POLD3      | ENSG00000077514.8  | 5.189165854 | 3.930962385 | 4.089944882 |
| PDIA5      | ENSG00000065485.19 | 3.830026424 | 5.659945731 | 4.933006    |
| ARL16      | ENSG00000214087.8  | 4.21164269  | 4.594697804 | 4.644743487 |
| TLE3       | ENSG00000140332.15 | 5.041056491 | 4.209201917 | 4.839685186 |
| BIRC2      | ENSG00000110330.8  | 5.039043555 | 4.069262864 | 4.928126636 |
| POLK       | ENSG00000122008.15 | 4.078223628 | 3.838163221 | 4.859200142 |
| HERC2P2    | ENSG00000276550.4  | 4.668113839 | 5.123102407 | 4.774893849 |
| KMT2A      | ENSG00000118058.20 | 4.715684566 | 3.820242689 | 4.221289414 |
| ESCO1      | ENSG00000141446.10 | 4.326352451 | 5.302696416 | 5.099045323 |
| NAPG       | ENSG00000134265.12 | 3.81924985  | 5.004348446 | 4.965181473 |
| TMEM41A    | ENSG00000163900.10 | 3.927669452 | 3.996228746 | 4.320508818 |
| RNF121     | ENSG00000137522.17 | 4.847555461 | 4.219267896 | 4.393058489 |
| FGFR1OP2   | ENSG00000111790.13 | 5.360666625 | 4.355834983 | 5.392164315 |
| GATB       | ENSG00000059691.11 | 3.97783051  | 4.398622063 | 4.77653867  |
| TMEM2      | ENSG00000135048.13 | 7.438913236 | 6.873605549 | 3.883894214 |
| ZRSR2      | ENSG00000169249.12 | 4.527810889 | 3.891347423 | 4.128568751 |
| ARFIP1     | ENSG00000164144.15 | 4.601819843 | 3.900910125 | 4.34010516  |
| MIS18BP1   | ENSG00000129534.13 | 5.245021918 | 3.908034209 | 3.907509512 |
| MAPKBP1    | ENSG00000137802.13 | 3.903400713 | 4.64212583  | 5.243609962 |
| TXNDC15    | ENSG00000113621.14 | 5.051242536 | 4.098484037 | 4.648797865 |
| ZDHHC20    | ENSG00000180776.15 | 5.212298472 | 4.885599716 | 5.191781998 |
| TAF8       | ENSG00000137413.15 | 4.312313394 | 4.010098731 | 4.5731381   |
| CMSS1      | ENSG00000184220.11 | 5.34172346  | 4.607158526 | 4.349439102 |
| FUNDC1     | ENSG00000069509.5  | 4.747259093 | 4.903649794 | 4.446084251 |
| AC027644.3 | ENSG00000272831.1  | 3.84015359  | 4.761489643 | 4.195257837 |
| GALNT7     | ENSG00000109586.11 | 4.79249898  | 4.793763474 | 5.234644547 |
| POLG2      | ENSG00000256525.6  | 4.990735611 | 4.878440794 | 4.834538402 |
| RNF214     | ENSG00000167257.10 | 4.535827555 | 3.947868355 | 4.831814638 |
| SLC25A25   | ENSG00000148339.12 | 4.548625183 | 5.34713517  | 3.941954102 |
| TMED8      | ENSG00000100580.7  | 4.505636317 | 3.971292837 | 4.643086366 |
| PPIL2      | ENSG00000100023.18 | 4.594807746 | 4.025326889 | 4.393574002 |
| KHNYN      | ENSG00000100441.9  | 4.44158377  | 4.391446592 | 4.725819408 |
| ERI2       | ENSG00000196678.13 | 4.507119858 | 3.993875932 | 3.79330188  |

|          |                    |             |             |             |
|----------|--------------------|-------------|-------------|-------------|
| CEPT1    | ENSG00000134255.13 | 4.359391819 | 4.525697558 | 4.300493875 |
| TAX1BP3  | ENSG00000213977.7  | 6.227275507 | 5.270681469 | 3.863736919 |
| SLC25A38 | ENSG00000144659.10 | 5.799091246 | 5.641545797 | 4.58047215  |
| MCAT     | ENSG00000100294.12 | 4.083113666 | 3.972299622 | 4.391450958 |
| PTPRF    | ENSG00000142949.16 | 6.236165285 | 5.10992014  | 3.917007157 |
| SRF      | ENSG00000112658.7  | 5.182189696 | 4.806164028 | 5.430611359 |
| ZNF652   | ENSG00000198740.8  | 3.973993664 | 5.205132372 | 4.506612674 |
| ACYP1    | ENSG00000119640.8  | 4.280049238 | 3.9091594   | 5.091895457 |
| WDR54    | ENSG00000005448.16 | 6.120819549 | 4.923272672 | 3.820546502 |
| LEMD3    | ENSG00000174106.2  | 4.630577972 | 4.064904628 | 3.891399177 |
| DNAJC10  | ENSG00000077232.17 | 3.806609811 | 5.22862355  | 4.950591478 |
| DIMT1    | ENSG00000086189.9  | 5.598510858 | 3.812943011 | 4.42598454  |
| LARP6    | ENSG00000166173.10 | 5.64639604  | 5.213132307 | 5.583881967 |
| FAM133B  | ENSG00000234545.7  | 4.234285524 | 4.199777408 | 4.118705033 |
| TGFBR1   | ENSG00000106799.12 | 4.166772807 | 5.494518033 | 4.986746109 |
| RWDD4    | ENSG00000182552.14 | 4.73014348  | 4.150424815 | 3.874428212 |
| GIN52    | ENSG00000131153.8  | 5.156462377 | 4.115043436 | 4.101605746 |
| NRF1     | ENSG00000106459.14 | 4.21257288  | 3.840646618 | 3.896656139 |
| WDR91    | ENSG00000105875.13 | 4.057460015 | 5.986829332 | 5.249494965 |
| PPP2R5A  | ENSG00000066027.11 | 5.13328681  | 5.23007797  | 6.294428422 |
| VAC14    | ENSG00000103043.14 | 5.54992139  | 6.463874604 | 6.07546675  |
| PARD3    | ENSG00000148498.15 | 4.531676686 | 3.890289144 | 5.149742194 |
| DDX47    | ENSG00000213782.7  | 7.214839659 | 5.665478389 | 5.872132192 |
| COMMD3   | ENSG00000148444.15 | 5.107520934 | 4.360146519 | 5.38812328  |
| NOMO2    | ENSG00000185164.14 | 4.160885878 | 4.022081104 | 4.102396979 |
| TMEM110  | ENSG00000213533.11 | 4.23852756  | 4.696140363 | 4.06828676  |
| ZNF76    | ENSG00000065029.14 | 4.085851064 | 4.529553832 | 4.338544619 |
| WDR81    | ENSG00000167716.18 | 4.642136656 | 3.987753276 | 4.619943183 |
| CCDC77   | ENSG00000120647.9  | 5.182096559 | 3.912630419 | 4.602077437 |
| TNRC6B   | ENSG00000100354.20 | 4.291601416 | 4.854980635 | 4.71465049  |
| CPD      | ENSG00000108582.11 | 5.675696816 | 5.552665458 | 6.197304988 |
| LARP4B   | ENSG00000107929.14 | 4.729244899 | 4.53332371  | 4.762937487 |
| IFNAR2   | ENSG00000159110.19 | 4.020421102 | 4.391323223 | 4.759526723 |
| LDAH     | ENSG00000118961.14 | 4.184606319 | 4.581262503 | 3.866486523 |
| CHML     | ENSG00000203668.2  | 5.554376288 | 3.822028702 | 5.736648334 |
| OTULIN   | ENSG00000154124.4  | 4.498820053 | 4.412919834 | 4.627081331 |
| STARD4   | ENSG00000164211.12 | 4.057106113 | 4.662305048 | 5.606861418 |
| CDK2AP2  | ENSG00000167797.7  | 5.358202272 | 3.982369918 | 4.574251602 |
| MTND2P28 | ENSG00000225630.1  | 4.03125845  | 4.733090877 | 5.314487414 |
| ZSCAN29  | ENSG00000140265.12 | 4.538999513 | 4.551235459 | 4.594530546 |
| ABHD3    | ENSG00000158201.9  | 4.595873966 | 5.069969276 | 3.873188358 |
| BBS7     | ENSG00000138686.9  | 4.143128606 | 3.851841655 | 4.293098701 |
| SGO2     | ENSG00000163535.17 | 5.092408544 | 4.911089138 | 3.945057731 |
| MRPL1    | ENSG00000169288.17 | 4.974581676 | 4.76973249  | 4.077150129 |
| ENGASE   | ENSG00000167280.16 | 4.518689088 | 4.928392582 | 5.236012951 |
| ZFAND2A  | ENSG00000178381.11 | 4.608289876 | 5.408288498 | 4.963521256 |

|          |                    |             |             |             |
|----------|--------------------|-------------|-------------|-------------|
| KLHDC2   | ENSG00000165516.10 | 5.249284189 | 4.223529788 | 4.519071234 |
| MTR      | ENSG00000116984.12 | 5.353268731 | 3.802148868 | 4.271839554 |
| SLC7A6OS | ENSG00000103061.12 | 3.794664557 | 3.928926359 | 5.306046327 |
| SGSM2    | ENSG00000141258.12 | 4.331577615 | 3.947695739 | 4.685140798 |
| DTX2     | ENSG00000091073.19 | 4.123015164 | 4.385857957 | 4.125527294 |
| HGSNAT   | ENSG00000165102.14 | 3.76925177  | 4.039105342 | 4.426747262 |
| GON4L    | ENSG00000116580.18 | 4.796306744 | 4.845022048 | 4.097368419 |
| BMP1     | ENSG00000168487.17 | 4.507300455 | 4.8259589   | 3.863345554 |
| RPL22L1  | ENSG00000163584.17 | 7.48460362  | 5.115130958 | 5.301901621 |
| DENND6A  | ENSG00000174839.12 | 4.898673583 | 4.22335582  | 3.869454859 |
| ZNF121   | ENSG00000197961.11 | 4.879907653 | 5.378205923 | 4.516807944 |
| EEA1     | ENSG00000102189.16 | 4.608953189 | 6.096026611 | 3.815401269 |
| SLK      | ENSG00000065613.13 | 5.848385091 | 4.388827509 | 5.228335633 |
| CNIH4    | ENSG00000143771.11 | 5.415789407 | 4.451313778 | 4.002024806 |
| KIFAP3   | ENSG00000075945.12 | 5.964825907 | 4.564499874 | 6.085689614 |
| VPS8     | ENSG00000156931.15 | 3.750605387 | 6.283472213 | 5.501310152 |
| MTATP8P1 | ENSG00000240409.1  | 3.856959526 | 5.695303294 | 4.812423199 |
| PCBP4    | ENSG00000090097.21 | 7.146930443 | 6.061293746 | 3.897896779 |
| TTC38    | ENSG00000075234.16 | 4.159670632 | 4.348725158 | 4.136784466 |
| UTP20    | ENSG00000120800.4  | 5.577746153 | 5.33332232  | 3.777091884 |
| CENPT    | ENSG00000102901.12 | 4.661059483 | 3.774672177 | 4.400364434 |
| MRPL34   | ENSG00000130312.6  | 5.971033598 | 5.772965074 | 5.143947283 |
| HSPA1A   | ENSG00000204389.9  | 4.790280634 | 5.159482902 | 5.439551619 |
| MECR     | ENSG00000116353.15 | 4.15052946  | 4.266444547 | 3.848276944 |
| SETX     | ENSG00000107290.13 | 3.854722644 | 5.676650249 | 4.695437463 |
| CAPN7    | ENSG00000131375.9  | 5.474532983 | 5.380189388 | 4.098754489 |
| RNF135   | ENSG00000181481.13 | 4.536273287 | 4.106699941 | 4.284258178 |
| NEK4     | ENSG00000114904.12 | 4.59850974  | 4.290478497 | 3.966985465 |
| ARMC7    | ENSG00000125449.6  | 4.526451334 | 3.873558286 | 4.761336713 |
| IER2     | ENSG00000160888.6  | 6.06156684  | 5.933996692 | 5.966169023 |
| IFT81    | ENSG00000122970.15 | 5.254855932 | 5.812430687 | 3.78996789  |
| OXLD1    | ENSG00000204237.4  | 5.61744393  | 4.885460136 | 4.289859197 |
| DSTYK    | ENSG00000133059.16 | 4.150976588 | 4.700787756 | 8.460476455 |
| MPDZ     | ENSG00000107186.16 | 5.084092661 | 4.379002743 | 4.971383675 |
| B3GLCT   | ENSG00000187676.7  | 3.77725834  | 3.963787288 | 4.13061412  |
| TBL3     | ENSG00000183751.14 | 5.126602325 | 4.52560724  | 4.241267299 |
| MPP1     | ENSG00000130830.14 | 3.902181183 | 4.345347889 | 5.063165238 |
| RAD9A    | ENSG00000172613.7  | 4.639628516 | 3.976020473 | 4.920743183 |
| DIRC2    | ENSG00000138463.8  | 3.830283996 | 5.155883717 | 4.668271393 |
| SOS1     | ENSG00000115904.12 | 4.580838479 | 4.549658979 | 4.202607555 |
| EARS2    | ENSG00000103356.15 | 4.897251247 | 4.439311411 | 4.379134693 |
| SNAPC5   | ENSG00000174446.12 | 4.390424958 | 4.464231727 | 4.129878743 |
| RRAS2    | ENSG00000133818.13 | 4.835519416 | 4.854080568 | 4.419312818 |
| FAM126A  | ENSG00000122591.11 | 3.912249632 | 5.164281931 | 4.066059202 |
| MAP2K7   | ENSG00000076984.17 | 4.539763592 | 4.068120992 | 4.198692181 |
| PTPN14   | ENSG00000152104.11 | 6.048395221 | 4.857616295 | 4.684514378 |

|           |                    |             |             |             |
|-----------|--------------------|-------------|-------------|-------------|
| ZPR1      | ENSG00000109917.10 | 5.50072917  | 3.757854427 | 5.082009282 |
| PNMA1     | ENSG00000176903.4  | 4.669717661 | 4.919897534 | 3.812849295 |
| RNASEH2B  | ENSG00000136104.19 | 4.834784041 | 3.956597912 | 4.125991212 |
| EXOC8     | ENSG00000116903.7  | 4.303421962 | 3.755196217 | 3.887130924 |
| KLHDC4    | ENSG00000104731.13 | 5.440768503 | 4.68990736  | 5.394702965 |
| SNHG5     | ENSG00000203875.10 | 7.625622404 | 7.229905669 | 4.047746433 |
| CYP20A1   | ENSG00000119004.15 | 3.826780112 | 4.404297317 | 3.952235069 |
| MIS18A    | ENSG00000159055.3  | 4.868635714 | 5.111901349 | 3.845020634 |
| KLHL24    | ENSG00000114796.15 | 4.152395196 | 5.729730305 | 5.550014473 |
| PTPRG     | ENSG00000144724.19 | 4.850542923 | 5.199708754 | 5.873075898 |
| SELENOO   | ENSG00000073169.13 | 3.797466232 | 4.888295886 | 3.905095706 |
| PIGBOS1   | ENSG00000225973.3  | 4.739790291 | 4.76212822  | 4.863540855 |
| CEBPG     | ENSG00000153879.8  | 4.9345686   | 4.447596386 | 5.752508598 |
| ASB3      | ENSG00000115239.21 | 4.794675629 | 4.422781866 | 3.821107823 |
| NLK       | ENSG00000087095.12 | 4.775001913 | 5.574131084 | 5.704842285 |
| PCDHGC3   | ENSG00000240184.6  | 6.083463684 | 4.769149062 | 6.550227189 |
| ANKS1A    | ENSG00000064999.13 | 3.787467596 | 4.880516575 | 8.466196902 |
| RAB11FIP5 | ENSG00000135631.16 | 3.914000052 | 4.451898053 | 4.491374671 |
| VPS33B    | ENSG00000184056.14 | 4.625685343 | 4.785392793 | 4.102961729 |
| CENPH     | ENSG00000153044.9  | 6.056692984 | 3.986674003 | 4.339390201 |
| CDK8      | ENSG00000132964.11 | 4.822181376 | 4.560988577 | 4.003879726 |
| YIPF4     | ENSG00000119820.10 | 4.687199979 | 4.532197836 | 3.782562869 |
| KTI12     | ENSG00000198841.3  | 5.041891718 | 4.686058841 | 3.908344956 |
| C22orf46  | ENSG00000184208.10 | 4.796235424 | 4.715779829 | 4.534231138 |
| MANBA     | ENSG00000109323.8  | 3.900396536 | 4.637762662 | 4.953873444 |
| GMEB2     | ENSG00000101216.10 | 4.176491617 | 3.853010983 | 4.299631133 |
| MED27     | ENSG00000160563.13 | 6.160728223 | 6.049615361 | 3.80290413  |
| CDC42EP4  | ENSG00000179604.9  | 5.477383397 | 4.900870492 | 3.829059787 |
| BET1      | ENSG00000105829.11 | 4.410051951 | 6.061974482 | 4.651553613 |
| PAXIP1    | ENSG00000157212.18 | 4.232586521 | 4.637438483 | 3.861640475 |
| NET1      | ENSG00000173848.18 | 5.988799373 | 3.885188783 | 4.543484849 |
| UCK1      | ENSG00000130717.12 | 5.573852813 | 6.138163111 | 3.841099506 |
| GCAT      | ENSG00000100116.16 | 3.806748283 | 5.034328151 | 5.912681606 |
| HKR1      | ENSG00000181666.17 | 4.633461459 | 4.650287851 | 4.703272127 |
| DFNA5     | ENSG00000105928.13 | 3.894869633 | 5.573382355 | 6.023060389 |
| PROSER1   | ENSG00000120685.19 | 4.499753226 | 4.16816376  | 4.570124662 |
| HIPK3     | ENSG00000110422.11 | 3.888585408 | 4.749735042 | 5.839016431 |
| PLK2      | ENSG00000145632.14 | 5.570896184 | 5.955591492 | 3.838601091 |
| TEX41     | ENSG00000226674.8  | 3.768676364 | 5.564578597 | 4.680341796 |
| MPPE1     | ENSG00000154889.16 | 3.983585235 | 4.610278341 | 3.995233828 |
| ANAPC4    | ENSG00000053900.10 | 5.076790035 | 4.053175682 | 5.63948196  |
| PPP3CB    | ENSG00000107758.15 | 4.882145194 | 4.932234977 | 5.297028225 |
| LINC00969 | ENSG00000242086.8  | 3.94290159  | 5.246967006 | 4.877620635 |
| PLPP5     | ENSG00000147535.16 | 3.804824776 | 4.815561286 | 4.65245032  |
| SPAG16    | ENSG00000144451.18 | 3.823711638 | 4.864202626 | 5.403105468 |
| GPN2      | ENSG00000142751.14 | 4.845141979 | 3.873566988 | 3.795269458 |

|            |                    |             |             |             |
|------------|--------------------|-------------|-------------|-------------|
| TRMT1L     | ENSG00000121486.11 | 5.046816487 | 4.379316538 | 3.936034149 |
| LRP6       | ENSG00000070018.8  | 5.387999592 | 4.869580337 | 5.50302995  |
| ICE1       | ENSG00000164151.11 | 5.229314778 | 5.253766347 | 3.795590622 |
| ARHGEF3    | ENSG00000163947.11 | 4.650368725 | 4.439544465 | 7.011195479 |
| CTSH       | ENSG00000103811.15 | 3.817443637 | 6.969080708 | 6.86383637  |
| SH3GLB2    | ENSG00000148341.17 | 5.101056624 | 5.65209036  | 4.714111315 |
| CTNNBIP1   | ENSG00000178585.14 | 5.75190603  | 4.009427985 | 5.873933313 |
| SENP1      | ENSG00000079387.13 | 4.962452288 | 3.882382061 | 4.29944256  |
| FZR1       | ENSG00000105325.13 | 4.715624958 | 4.190397982 | 4.404674861 |
| SYNGR2     | ENSG00000108639.7  | 5.09573778  | 5.399002019 | 5.896742145 |
| AGO2       | ENSG00000123908.11 | 4.877593138 | 4.49778432  | 4.321154799 |
| DOHH       | ENSG00000129932.8  | 4.323971028 | 3.822642471 | 4.052982788 |
| PLEKHO1    | ENSG00000023902.13 | 4.833235468 | 5.767444959 | 4.271946281 |
| SORD       | ENSG00000140263.13 | 5.243846401 | 4.899746261 | 4.79485584  |
| BCKDHA     | ENSG00000248098.11 | 5.083827223 | 5.007887422 | 4.310016874 |
| ORC2       | ENSG00000115942.8  | 4.795475386 | 4.920339531 | 4.494293659 |
| ZNF75A     | ENSG00000162086.14 | 3.865340191 | 3.896910066 | 4.471464497 |
| CCS        | ENSG00000173992.8  | 4.58591965  | 4.396260581 | 4.292462359 |
| TRMT12     | ENSG00000183665.5  | 4.921361492 | 4.283358788 | 4.357641796 |
| LDLRAD3    | ENSG00000179241.12 | 5.46608841  | 6.017228234 | 7.250209218 |
| PAX3       | ENSG00000135903.18 | 3.854956129 | 5.072906169 | 4.970184826 |
| AGAP2-AS1  | ENSG00000255737.2  | 4.432457682 | 4.63404503  | 6.229321745 |
| SUCO       | ENSG00000094975.13 | 4.573399828 | 3.803546921 | 4.453671962 |
| MSL3       | ENSG00000005302.17 | 5.492110524 | 4.233287745 | 3.852747832 |
| ZFAND2B    | ENSG00000158552.12 | 3.812028304 | 4.18659921  | 4.955706699 |
| FAM60A     | ENSG00000139146.13 | 5.256008582 | 5.141819635 | 4.482344357 |
| ZNF503     | ENSG00000165655.16 | 3.741855026 | 4.735191261 | 4.615859798 |
| SLC25A30   | ENSG00000174032.16 | 4.251273912 | 4.394031143 | 4.761258268 |
| UBR1       | ENSG00000159459.11 | 5.215218881 | 4.929319261 | 4.538385415 |
| PHIP       | ENSG00000146247.13 | 4.808834205 | 4.012350394 | 3.931484039 |
| ISYNA1     | ENSG00000105655.18 | 3.917240155 | 4.614942167 | 6.782781484 |
| MTERF1     | ENSG00000127989.13 | 4.681110435 | 4.669876699 | 4.931906905 |
| PITPNA-AS1 | ENSG00000236618.2  | 5.261115433 | 3.915516396 | 4.306808212 |
| TFCP2      | ENSG00000135457.9  | 5.385088766 | 4.67176905  | 4.484656789 |
| CBY1       | ENSG00000100211.10 | 4.360316398 | 4.845382567 | 4.560792508 |
| AC067852.2 | ENSG00000266962.2  | 4.905316644 | 4.218789934 | 4.864986569 |
| MOSPD3     | ENSG00000106330.11 | 3.939690896 | 4.756083672 | 5.250448783 |
| C1orf27    | ENSG00000157181.15 | 4.725489024 | 3.995982124 | 3.926761609 |
| PHF3       | ENSG00000118482.11 | 5.792571662 | 5.165563245 | 5.396563539 |
| CEP57      | ENSG00000166037.10 | 5.206097378 | 4.016282759 | 5.778051444 |
| APPL2      | ENSG00000136044.11 | 5.082408265 | 4.295734899 | 3.857633651 |
| NR2C2AP    | ENSG00000184162.14 | 5.160489129 | 3.889816975 | 4.134916405 |
| RN7SL1     | ENSG00000276168.1  | 5.713444395 | 5.286486748 | 6.371145066 |
| ETV6       | ENSG00000139083.10 | 4.584878205 | 4.011462382 | 5.421966821 |
| SMARCD3    | ENSG00000082014.16 | 3.790584584 | 3.863082284 | 3.874978679 |
| MCRIP1     | ENSG00000225663.7  | 4.789224158 | 3.739096506 | 5.680331344 |



|          |                    |             |             |             |
|----------|--------------------|-------------|-------------|-------------|
| SEC22B   | ENSG00000265808.3  | 3.701192584 | 4.161986607 | 3.863332778 |
| NFE2L3   | ENSG00000050344.8  | 5.04711231  | 4.130971504 | 3.791577767 |
| SPC25    | ENSG00000152253.8  | 4.21253667  | 4.716398558 | 3.724059949 |
| REPS1    | ENSG00000135597.18 | 4.480700326 | 5.032514814 | 4.386585855 |
| NOA1     | ENSG00000084092.6  | 4.898285535 | 3.75419419  | 4.414312637 |
| SIRPA    | ENSG00000198053.11 | 4.532214236 | 8.260595433 | 5.856289538 |
| NUP107   | ENSG00000111581.9  | 5.550641489 | 4.74095093  | 3.710320006 |
| KYAT3    | ENSG00000137944.17 | 3.79672131  | 4.828051292 | 4.434711998 |
| TBC1D31  | ENSG00000156787.16 | 4.438810531 | 3.913691215 | 4.266091569 |
| SCRN3    | ENSG00000144306.14 | 3.896349052 | 4.755667766 | 4.824963226 |
| CASP6    | ENSG00000138794.9  | 4.172723944 | 4.235637932 | 4.051895051 |
| B4GALT1  | ENSG00000086062.12 | 5.612552737 | 6.221858065 | 3.784709502 |
| FBXL6    | ENSG00000182325.10 | 5.066791376 | 4.158718049 | 3.797435437 |
| TMEM161A | ENSG00000064545.14 | 5.124984148 | 4.664602754 | 4.135714984 |
| KLHL42   | ENSG00000087448.9  | 4.531271291 | 4.076872611 | 4.578072401 |
| SMARCAL1 | ENSG00000138375.12 | 3.964299003 | 5.265029877 | 4.897888231 |
| BNIP1    | ENSG00000113734.17 | 4.793485095 | 3.827947779 | 4.400829456 |
| KCTD1    | ENSG00000134504.12 | 3.775648579 | 4.154290803 | 4.468777159 |
| STAG3L2  | ENSG00000277072.4  | 4.202905719 | 4.148266681 | 4.195936982 |
| RBMXL1   | ENSG00000213516.9  | 4.717849903 | 4.090124106 | 3.772913023 |
| TAF9B    | ENSG00000187325.4  | 5.191679572 | 4.301153006 | 4.969161513 |
| C8orf76  | ENSG00000189376.11 | 5.221320864 | 4.406013096 | 4.533565069 |
| ARHGEF40 | ENSG00000165801.9  | 4.890227447 | 5.828096112 | 3.701684941 |
| CEP250   | ENSG00000126001.15 | 4.725902388 | 3.801537026 | 4.270935769 |
| SMU1     | ENSG00000122692.8  | 5.504309093 | 4.192921042 | 3.940798745 |
| STAM2    | ENSG00000115145.9  | 3.767904779 | 4.576733052 | 5.084222865 |
| RCE1     | ENSG00000173653.7  | 4.736129466 | 4.732593586 | 3.983007206 |
| MBOAT2   | ENSG00000143797.11 | 4.013430438 | 4.459689146 | 4.912082183 |
| DOCK1    | ENSG00000150760.12 | 5.363147698 | 4.969263977 | 5.064065574 |
| RFNG     | ENSG00000169733.11 | 4.076843238 | 4.954383908 | 5.47613219  |
| FBXO17   | ENSG00000269190.5  | 5.083116137 | 3.90589336  | 3.715240925 |
| SLC25A14 | ENSG00000102078.15 | 5.227320448 | 4.588563697 | 4.665494488 |
| KRT10    | ENSG00000186395.7  | 5.712038667 | 4.890524942 | 5.259956818 |
| TMEM106B | ENSG00000106460.18 | 3.794511754 | 5.088450873 | 4.134184954 |
| CCNY     | ENSG00000108100.17 | 5.26990264  | 4.232475379 | 4.863657421 |
| SGK3     | ENSG00000104205.12 | 3.86663905  | 4.046099273 | 3.7207537   |
| PRIM2    | ENSG00000146143.17 | 4.346255499 | 4.326197302 | 3.755350492 |
| WASHC2C  | ENSG00000172661.17 | 3.863182262 | 4.002625767 | 5.095841902 |
| ZNF581   | ENSG00000171425.9  | 4.99241459  | 3.71365811  | 5.193080708 |
| TMEM99   | ENSG00000167920.8  | 4.316807043 | 4.147505043 | 5.396476607 |
| TOLLIP   | ENSG00000078902.15 | 3.841582122 | 5.653227355 | 5.281191246 |
| PDF      | ENSG00000258429.1  | 5.705130119 | 3.824657431 | 5.105569865 |
| WASF3    | ENSG00000132970.12 | 3.736192537 | 4.888709919 | 5.043391282 |
| CAMSAP1  | ENSG00000130559.18 | 4.470605692 | 4.705897209 | 4.982071793 |
| B3GALT6  | ENSG00000176022.4  | 5.042918324 | 3.944264437 | 3.800996267 |
| RGS10    | ENSG00000148908.14 | 5.458891562 | 6.453679386 | 8.159669397 |

|            |                    |             |             |             |
|------------|--------------------|-------------|-------------|-------------|
| UEVLD      | ENSG00000151116.16 | 3.724875109 | 5.281220699 | 4.193725671 |
| PMS1       | ENSG00000064933.17 | 3.866387455 | 4.42573911  | 5.019963971 |
| RBL1       | ENSG00000080839.11 | 4.826743525 | 3.755290008 | 3.971459952 |
| TBRG1      | ENSG00000154144.12 | 4.823110447 | 4.347191888 | 4.956288505 |
| SIAH1      | ENSG00000196470.11 | 4.605112632 | 3.81048305  | 6.438947189 |
| ICE2       | ENSG00000128915.11 | 4.516038175 | 4.093334226 | 4.616880348 |
| EZH1       | ENSG00000108799.12 | 4.855705964 | 4.931043886 | 5.483487786 |
| N4BP1      | ENSG00000102921.7  | 4.2695523   | 3.730032702 | 4.251312566 |
| WDR35      | ENSG00000118965.14 | 4.750440741 | 4.146283796 | 3.942888215 |
| HDAC7      | ENSG00000061273.17 | 4.908167866 | 3.702702286 | 4.705794787 |
| RBM38      | ENSG00000132819.16 | 4.213709196 | 4.117247823 | 4.027869068 |
| KIF18B     | ENSG00000186185.13 | 5.686295234 | 4.474158695 | 3.801823517 |
| IMMP1L     | ENSG00000148950.9  | 4.722745509 | 4.026495074 | 5.369965146 |
| EXO1       | ENSG00000174371.16 | 6.131591285 | 3.966409673 | 3.85459599  |
| ATPAF2     | ENSG00000171953.15 | 4.6883551   | 3.952366474 | 3.836954099 |
| ZC3H3      | ENSG00000014164.6  | 4.37939397  | 4.40560346  | 4.379429353 |
| ZFYVE21    | ENSG00000100711.13 | 4.104908285 | 4.897113281 | 3.783735479 |
| ULK1       | ENSG00000177169.9  | 4.449322075 | 4.384760023 | 6.153405322 |
| MRI1       | ENSG00000037757.13 | 6.263630382 | 5.213246119 | 4.030387012 |
| TANC2      | ENSG00000170921.15 | 5.534830834 | 4.637951544 | 4.164308243 |
| TWNK       | ENSG00000107815.7  | 6.555010445 | 4.351329708 | 4.52804016  |
| CACNB3     | ENSG00000167535.7  | 4.509826153 | 4.141490063 | 3.905990394 |
| TULP4      | ENSG00000130338.12 | 4.494285478 | 4.739866262 | 4.735640242 |
| GOLGA1     | ENSG00000136935.13 | 4.290122876 | 4.803943296 | 3.691305119 |
| PHF10      | ENSG00000130024.14 | 5.865964987 | 4.691840641 | 4.238445722 |
| DCAKD      | ENSG00000172992.11 | 4.397939213 | 5.002010917 | 4.912080717 |
| ACD        | ENSG00000102977.13 | 5.173476365 | 3.822064601 | 4.931577479 |
| SMG6       | ENSG00000070366.13 | 4.368778115 | 3.722064426 | 4.345071167 |
| PROS1      | ENSG00000184500.14 | 3.858839602 | 7.59089362  | 5.076869176 |
| ARHGAP18   | ENSG00000146376.10 | 4.435396583 | 3.732223458 | 3.907502855 |
| PCGF3      | ENSG00000185619.18 | 4.963267884 | 3.8177688   | 6.677292547 |
| CCDC94     | ENSG00000105248.15 | 5.00446135  | 4.325567756 | 4.237573808 |
| NDC80      | ENSG00000080986.12 | 5.706589091 | 4.827050301 | 3.803591995 |
| RMI2       | ENSG00000175643.8  | 5.199462714 | 4.280842307 | 3.790443296 |
| BRD1       | ENSG00000100425.18 | 3.794979832 | 3.910490409 | 4.179244916 |
| STAG3L4    | ENSG00000106610.14 | 3.785478055 | 4.640587118 | 4.519231354 |
| ATG4C      | ENSG00000125703.14 | 4.124874956 | 3.939411287 | 3.731437365 |
| MARCH5     | ENSG00000198060.9  | 4.970428287 | 4.166084704 | 4.711718836 |
| AC100810.1 | ENSG00000253982.1  | 3.951230992 | 3.842944134 | 4.405541775 |
| NUP188     | ENSG00000095319.14 | 6.602179171 | 5.947493564 | 3.753049647 |
| ERP44      | ENSG00000023318.7  | 5.276284901 | 6.225320542 | 3.692606069 |
| TNIK       | ENSG00000154310.16 | 4.164049496 | 5.388173106 | 5.71101615  |
| LNPK       | ENSG00000144320.13 | 3.690093246 | 5.446325738 | 4.742389627 |
| ABCC4      | ENSG00000125257.13 | 4.999015023 | 4.588341697 | 4.293173181 |
| PLEKHM1    | ENSG00000225190.10 | 4.004280836 | 4.876279365 | 5.048916085 |
| PIAS4      | ENSG00000105229.6  | 4.410307678 | 4.19929458  | 4.167393135 |

|            |                    |             |             |             |
|------------|--------------------|-------------|-------------|-------------|
| EIF4E      | ENSG00000151247.12 | 4.755562966 | 4.100892776 | 3.746650056 |
| CTNNAL1    | ENSG00000119326.14 | 6.763929861 | 5.128920312 | 3.874250128 |
| ANGEL2     | ENSG00000174606.13 | 5.742745461 | 3.739521049 | 5.252534984 |
| PPHLN1     | ENSG00000134283.17 | 6.148822271 | 6.116551117 | 3.873447274 |
| AC003002.1 | ENSG00000256060.2  | 4.765068774 | 3.770283385 | 4.281689938 |
| LINC02001  | ENSG00000267321.2  | 4.088991998 | 4.222004817 | 4.15530888  |
| ZKSCAN1    | ENSG00000106261.16 | 5.107848573 | 4.814537269 | 5.174433832 |
| CDC42BPB   | ENSG00000198752.10 | 5.256599111 | 5.474783277 | 3.703529667 |
| SLC35A2    | ENSG00000102100.15 | 5.485006856 | 5.054601646 | 3.67615938  |
| ZMAT3      | ENSG00000172667.10 | 3.681756889 | 5.978872297 | 7.145846525 |
| MIR1244-2  | ENSG00000283498.1  | 5.754516798 | 4.983121654 | 3.974443636 |
| AP5B1      | ENSG00000254470.2  | 4.63789114  | 4.702847544 | 4.314922898 |
| KCTD20     | ENSG00000112078.13 | 4.383026287 | 5.450549943 | 6.928110654 |
| SLC9A3R1   | ENSG00000109062.11 | 4.666136844 | 4.219396577 | 4.621785503 |
| RIPK4      | ENSG00000183421.11 | 5.142095027 | 6.861948259 | 3.746081309 |
| SIAH2      | ENSG00000181788.3  | 5.308837987 | 4.357004979 | 4.318049221 |
| TSPAN17    | ENSG00000048140.17 | 3.948398223 | 5.125033595 | 4.769875996 |
| SMC5       | ENSG00000198887.8  | 5.745296532 | 4.814640995 | 3.662694389 |
| FAM173B    | ENSG00000150756.13 | 3.714775246 | 4.440247581 | 4.524146667 |
| XRN1       | ENSG00000114127.10 | 4.443694558 | 4.103813277 | 4.471506014 |
| C2CD3      | ENSG00000168014.16 | 4.840789572 | 5.116709117 | 4.528103231 |
| VHL        | ENSG00000134086.7  | 4.989588354 | 4.440048097 | 4.224024605 |
| MAPK14     | ENSG00000112062.10 | 4.691375634 | 4.529036871 | 5.266032977 |
| ZNF131     | ENSG00000172262.11 | 4.711713696 | 3.812565068 | 4.277426576 |
| COQ3       | ENSG00000132423.11 | 4.946161511 | 4.006821304 | 3.858181805 |
| FBXO45     | ENSG00000174013.7  | 4.335962313 | 3.926486165 | 3.773222976 |
| LINC00667  | ENSG00000263753.6  | 4.53173607  | 5.384539353 | 3.955195026 |
| ETHE1      | ENSG00000105755.7  | 6.521850803 | 4.780526647 | 5.35398443  |
| WDR6       | ENSG00000178252.17 | 4.769312371 | 4.237206762 | 4.104936069 |
| TFB1M      | ENSG00000029639.10 | 6.091736    | 3.812416494 | 4.007197697 |
| MOB2       | ENSG00000182208.13 | 4.395413508 | 4.822465866 | 4.830384589 |
| THADA      | ENSG00000115970.18 | 5.416153283 | 4.780551905 | 3.76786872  |
| ABHD6      | ENSG00000163686.14 | 4.558902491 | 5.195975942 | 3.743199578 |
| TMEM186    | ENSG00000184857.7  | 5.069298013 | 4.262679427 | 3.948894473 |
| UPF2       | ENSG00000151461.19 | 4.524506163 | 4.185665237 | 4.579557065 |
| IGHMBP2    | ENSG00000132740.8  | 4.578754963 | 4.17263665  | 4.468196928 |
| MCC        | ENSG00000171444.17 | 3.653306408 | 3.926469895 | 6.038245948 |
| HEATR1     | ENSG00000119285.10 | 7.069635395 | 4.898268872 | 4.871846894 |
| ATP6V0A2   | ENSG00000185344.13 | 4.24505074  | 4.083274213 | 4.379411339 |
| LRIF1      | ENSG00000121931.15 | 3.76396182  | 4.881734804 | 4.771165945 |
| IFT80      | ENSG00000068885.14 | 4.50365652  | 4.779081851 | 4.499244426 |
| AC006504.5 | ENSG00000267575.6  | 4.273260542 | 4.503948933 | 4.312362088 |
| TRNAU1AP   | ENSG00000180098.9  | 4.516254612 | 3.819024391 | 4.223375237 |
| BCAT2      | ENSG00000105552.14 | 5.838289001 | 5.701995251 | 4.734733377 |
| LACTB      | ENSG00000103642.11 | 3.777114918 | 5.543062051 | 5.341786626 |
| AQR        | ENSG00000021776.10 | 4.942134009 | 4.620918673 | 4.020071946 |

|            |                    |             |             |             |
|------------|--------------------|-------------|-------------|-------------|
| UBR7       | ENSG00000012963.14 | 5.408382682 | 4.117653707 | 3.70576794  |
| FAAP20     | ENSG00000162585.16 | 5.796552555 | 5.991307898 | 6.454439157 |
| MTERF4     | ENSG00000122085.16 | 4.316325467 | 4.642256856 | 4.13414566  |
| NEDD4      | ENSG00000069869.15 | 4.865545556 | 3.703964625 | 5.010074859 |
| PLA2G4A    | ENSG00000116711.9  | 4.174830517 | 5.113325066 | 4.138820134 |
| SMARCA1    | ENSG00000102038.15 | 5.290337381 | 5.816841093 | 6.095786851 |
| DPCD       | ENSG00000166171.12 | 5.420036758 | 3.939061471 | 4.185355861 |
| ANKRD13C   | ENSG00000118454.12 | 4.378474432 | 3.671690225 | 4.155617852 |
| GALK1      | ENSG00000108479.11 | 4.232938063 | 4.908131058 | 3.755197285 |
| KATNAL1    | ENSG00000102781.13 | 3.74895834  | 4.086418267 | 3.828776506 |
| UBR3       | ENSG00000144357.16 | 3.686892861 | 4.401829633 | 4.727885804 |
| GANC       | ENSG00000214013.9  | 4.365193959 | 4.719054285 | 4.621121415 |
| GNPDA2     | ENSG00000163281.11 | 4.500508973 | 3.793004433 | 5.512598194 |
| MLLT10     | ENSG00000078403.16 | 4.837168543 | 4.41709496  | 4.68029545  |
| COG8       | ENSG00000213380.14 | 4.538849271 | 4.203822843 | 4.198350987 |
| MT-TK      | ENSG00000210156.1  | 4.228104552 | 5.883807254 | 3.995278876 |
| RNF41      | ENSG00000181852.17 | 6.043005813 | 4.206692253 | 3.752607261 |
| UBE2K      | ENSG00000078140.13 | 6.60764779  | 4.161187693 | 7.185972207 |
| HEATR3     | ENSG00000155393.12 | 5.038911626 | 3.657212274 | 3.765683065 |
| RAPH1      | ENSG00000173166.17 | 4.079943974 | 4.637048808 | 3.693150953 |
| NUF2       | ENSG00000143228.12 | 6.679395215 | 4.919895655 | 3.657876243 |
| RSU1       | ENSG00000148484.17 | 4.459221463 | 4.359814579 | 4.984217611 |
| RAPGEF6    | ENSG00000158987.20 | 4.175268346 | 3.636144882 | 4.215891796 |
| NEDD9      | ENSG00000111859.16 | 4.040822767 | 5.494788704 | 4.341384988 |
| AC026401.3 | ENSG00000280206.1  | 5.16316086  | 3.727745148 | 6.553788567 |
| TMEM192    | ENSG00000170088.13 | 3.754313722 | 4.33534378  | 4.616822277 |
| BRD3       | ENSG00000169925.16 | 5.075725796 | 4.67620626  | 4.35942573  |
| SNAPC3     | ENSG00000164975.15 | 5.083925372 | 4.242789896 | 3.942564036 |
| CENPS      | ENSG00000175279.21 | 5.377632171 | 4.517600966 | 3.976991006 |
| PCNT       | ENSG00000160299.16 | 4.465673867 | 4.115626353 | 3.757954445 |
| RIOX1      | ENSG00000170468.7  | 4.293605918 | 4.48590684  | 3.890991047 |
| ST3GAL6    | ENSG00000064225.12 | 3.830711895 | 7.219487201 | 8.660004591 |
| SLC50A1    | ENSG00000169241.17 | 6.210495302 | 6.122610824 | 3.847128387 |
| HDAC5      | ENSG00000108840.15 | 5.119312308 | 4.626117535 | 5.971421294 |
| SPRYD7     | ENSG00000123178.14 | 3.931038867 | 3.917809478 | 3.778028505 |
| TRAPPC13   | ENSG00000113597.17 | 4.485254361 | 4.415928172 | 3.728986729 |
| VTA1       | ENSG00000009844.15 | 4.830568878 | 4.546228662 | 4.118502036 |
| TMEM189    | ENSG00000240849.10 | 5.714831206 | 3.866652765 | 4.793943111 |
| STK35      | ENSG00000125834.12 | 4.458851087 | 4.509828408 | 3.673087965 |
| DYRK1A     | ENSG00000157540.19 | 4.126091645 | 4.365856695 | 4.593062597 |
| ECSIT      | ENSG00000130159.13 | 5.789474091 | 4.631166492 | 5.034282651 |
| RBM45      | ENSG00000155636.14 | 4.24621899  | 4.322040739 | 4.347400429 |
| MRM3       | ENSG00000171861.10 | 5.167494592 | 3.988027252 | 3.714938479 |
| CDH2       | ENSG00000170558.8  | 6.6001596   | 4.387443214 | 3.656862566 |
| SNHG4      | ENSG00000281398.2  | 6.188474968 | 4.568000734 | 6.877546762 |
| FNBP1      | ENSG00000187239.16 | 4.670304524 | 5.123284311 | 3.735699449 |

|          |                    |             |             |             |
|----------|--------------------|-------------|-------------|-------------|
| FAM200B  | ENSG00000237765.6  | 4.754102125 | 3.885938508 | 6.286029344 |
| TAZ      | ENSG00000102125.15 | 4.236012675 | 5.145915583 | 4.469044117 |
| SHOC2    | ENSG00000108061.11 | 4.938205175 | 4.267581451 | 5.07358707  |
| MVK      | ENSG00000110921.13 | 4.282347069 | 4.031333735 | 3.674632756 |
| EMC10    | ENSG00000161671.16 | 3.82129165  | 5.332899494 | 5.21704978  |
| TTF2     | ENSG00000116830.11 | 4.306577315 | 4.159129621 | 3.676680176 |
| FOXP4    | ENSG00000137166.14 | 4.582187675 | 4.295516534 | 4.550533915 |
| RPS6KA3  | ENSG00000177189.12 | 6.59406802  | 4.795872264 | 6.94614766  |
| CCDC22   | ENSG00000101997.12 | 4.399877094 | 4.352871212 | 4.25973193  |
| PEX14    | ENSG00000142655.12 | 4.794095929 | 4.985052185 | 4.690464753 |
| RAD51AP1 | ENSG00000111247.14 | 5.014536376 | 4.09932179  | 5.089349658 |
| CCDC25   | ENSG00000147419.17 | 5.077746486 | 4.403510503 | 4.003875278 |
| ZFYVE1   | ENSG00000165861.13 | 3.684805333 | 3.995663057 | 4.589373421 |
| CCDC71   | ENSG00000177352.9  | 5.552361452 | 4.923360817 | 3.73476504  |
| CCDC115  | ENSG00000136710.9  | 3.919691738 | 5.780564138 | 5.204330613 |
| IDE      | ENSG00000119912.15 | 5.650018502 | 3.856108917 | 4.806549713 |
| MFSD14C  | ENSG00000196312.12 | 3.789972413 | 5.515598853 | 3.81138849  |
| GCLC     | ENSG00000001084.10 | 4.906347822 | 4.117584318 | 4.643327442 |
| VPS13D   | ENSG00000048707.13 | 4.032620091 | 4.439131394 | 5.059681611 |
| DZIP3    | ENSG00000198919.12 | 3.808425816 | 4.394421935 | 4.623483152 |
| TLK1     | ENSG00000198586.13 | 3.664081955 | 5.246055514 | 5.590633563 |
| IER3IP1  | ENSG00000134049.5  | 4.525660693 | 4.603104573 | 4.911202366 |
| MIGA2    | ENSG00000148343.18 | 4.40045726  | 4.898190431 | 3.884242479 |
| PILRB    | ENSG00000121716.20 | 3.91256239  | 4.382843857 | 6.121692194 |
| PECR     | ENSG00000115425.13 | 3.640002128 | 5.113489396 | 5.773379637 |
| ZNF721   | ENSG00000182903.15 | 4.648398174 | 3.749684956 | 4.953538662 |
| PEX10    | ENSG00000157911.9  | 4.239711558 | 5.000603648 | 4.372860141 |
| ZSWIM1   | ENSG00000168612.4  | 4.089787201 | 3.820610591 | 4.163513004 |
| SLC39A8  | ENSG00000138821.12 | 4.62530505  | 4.719122626 | 6.781988957 |
| ODF2L    | ENSG00000122417.15 | 4.822726043 | 5.141612051 | 3.665272009 |
| PAFAH2   | ENSG00000158006.13 | 3.918889411 | 4.877751555 | 4.11580099  |
| GABBR1   | ENSG00000204681.10 | 3.763579681 | 5.260148057 | 5.9395353   |
| PIGA     | ENSG00000165195.15 | 4.707141787 | 4.19549373  | 4.801582095 |
| PPM1A    | ENSG00000100614.17 | 4.347049847 | 4.204677549 | 4.849328339 |
| BUD13    | ENSG00000137656.11 | 5.240186041 | 3.746045394 | 3.872298801 |
| CLOCK    | ENSG00000134852.14 | 4.457830378 | 3.806760833 | 4.910947135 |
| SIK3     | ENSG00000160584.15 | 4.773750837 | 4.096412742 | 4.304787296 |
| TXLNG    | ENSG00000086712.12 | 5.589802889 | 3.674052304 | 4.035309592 |
| MAU2     | ENSG00000129933.20 | 5.557081267 | 4.636360523 | 4.312972596 |
| TMEM35B  | ENSG00000243749.1  | 4.047999409 | 4.986603377 | 3.741458006 |
| C10orf90 | ENSG00000154493.17 | 5.42976916  | 5.915364911 | 6.939408127 |
| TRNP1    | ENSG00000253368.3  | 6.136994098 | 4.741177375 | 4.760864173 |
| NCOA3    | ENSG00000124151.18 | 4.524290327 | 4.569695465 | 4.445107093 |
| MEX3C    | ENSG00000176624.10 | 5.67740275  | 6.510901743 | 6.912007721 |
| SFMBT1   | ENSG00000163935.13 | 3.95719632  | 4.148130497 | 4.562454832 |
| ZHX3     | ENSG00000174306.21 | 4.518811975 | 3.73293536  | 5.784584313 |

|          |                    |             |             |             |
|----------|--------------------|-------------|-------------|-------------|
| BDH1     | ENSG00000161267.11 | 4.206771219 | 4.410949861 | 4.246476778 |
| HDGFL3   | ENSG00000166503.8  | 3.961844836 | 3.675402302 | 4.239159423 |
| NPHP3    | ENSG00000113971.19 | 4.007858779 | 4.480920376 | 3.752730286 |
| FAM219A  | ENSG00000164970.14 | 4.513885787 | 4.662588709 | 4.378940499 |
| EDEM3    | ENSG00000116406.18 | 4.889209051 | 4.806031529 | 3.970303376 |
| APOBEC3B | ENSG00000179750.15 | 4.961302963 | 3.638313901 | 3.701687402 |
| APOPT1   | ENSG00000256053.7  | 4.454726081 | 4.793164851 | 3.755679987 |
| GEMIN4   | ENSG00000179409.10 | 5.180850517 | 3.991862361 | 3.86784901  |
| SLC25A23 | ENSG00000125648.14 | 3.824005836 | 5.785195731 | 6.121819386 |
| TMUB2    | ENSG00000168591.15 | 3.727295254 | 4.252855637 | 4.290041298 |
| TCAIM    | ENSG00000179152.19 | 4.912065161 | 4.585888071 | 4.728974944 |
| BAIAP2L1 | ENSG00000006453.13 | 4.877270596 | 6.09237068  | 5.461323339 |
| UBAP1    | ENSG00000165006.13 | 5.562722343 | 4.637087765 | 4.309853044 |
| PUS3     | ENSG00000110060.8  | 5.290115456 | 4.288994568 | 4.301302637 |
| CAV2     | ENSG00000105971.14 | 3.759830434 | 4.670931237 | 4.819556118 |
| DNASE1L1 | ENSG00000013563.13 | 4.667144742 | 4.715619048 | 4.200895408 |
| PHC3     | ENSG00000173889.15 | 3.696186211 | 4.718061867 | 4.371291314 |
| IFFO2    | ENSG00000169991.10 | 4.343907031 | 4.841203702 | 3.684974633 |
| RFK      | ENSG00000135002.11 | 5.642549912 | 5.492940247 | 3.663953702 |
| CLCC1    | ENSG00000121940.15 | 4.392736753 | 3.847751881 | 3.998167886 |
| THOC6    | ENSG00000131652.13 | 5.680831155 | 4.014663783 | 3.893480349 |
| ING3     | ENSG00000071243.15 | 4.696203471 | 3.938754067 | 4.079132755 |
| CEP170   | ENSG00000143702.15 | 5.205763231 | 4.282427868 | 3.708445922 |
| PTCD1    | ENSG00000106246.17 | 4.10281563  | 4.427116164 | 3.751340476 |
| ITFG2    | ENSG00000111203.11 | 4.467768495 | 3.994182856 | 5.492904268 |
| ALG13    | ENSG00000101901.11 | 5.011195889 | 4.660958441 | 5.103250587 |
| EIF2AK3  | ENSG00000172071.11 | 3.636795864 | 4.848486945 | 3.847358948 |
| ZADH2    | ENSG00000180011.6  | 4.381809037 | 4.407733541 | 5.400550935 |
| MEGF9    | ENSG00000106780.8  | 4.133874913 | 4.860357243 | 4.074587201 |
| FKBP15   | ENSG00000119321.8  | 4.463798848 | 5.136670086 | 3.803866249 |
| MSL2     | ENSG00000174579.3  | 4.725878715 | 4.136850732 | 4.322473891 |
| ZNF212   | ENSG00000170260.8  | 4.000769488 | 4.177763436 | 3.694471034 |
| DNAJC30  | ENSG00000176410.7  | 4.019043183 | 5.198854699 | 3.64066701  |
| GOPC     | ENSG00000047932.13 | 4.643502988 | 4.354302185 | 4.110851754 |
| TTI2     | ENSG00000129696.12 | 4.624128135 | 4.219026828 | 3.646130252 |
| SLC25A15 | ENSG00000102743.14 | 5.720482524 | 4.678880576 | 3.664570666 |
| ADAL     | ENSG00000168803.14 | 4.286250911 | 4.176949092 | 4.440847068 |
| GPATCH3  | ENSG00000198746.12 | 4.443637034 | 3.986474925 | 3.720270465 |
| HINT3    | ENSG00000111911.6  | 3.943136308 | 4.075019608 | 4.417433121 |
| LIG4     | ENSG00000174405.13 | 4.608440641 | 4.113717094 | 4.134844645 |
| MAP3K7   | ENSG00000135341.17 | 5.035110894 | 4.601929965 | 3.824593543 |
| MFAP3    | ENSG00000037749.11 | 5.075345979 | 4.411882583 | 4.791267509 |
| XPNPEP3  | ENSG00000196236.12 | 4.177253943 | 4.885428828 | 4.159519405 |
| KIAA1524 | ENSG00000163507.13 | 5.537915576 | 4.58854897  | 3.813327723 |
| LRR8A    | ENSG00000136802.11 | 5.870825857 | 6.739075959 | 3.608956765 |
| AFDN     | ENSG00000130396.20 | 3.72341831  | 4.732103034 | 5.650438742 |

|            |                    |             |             |             |
|------------|--------------------|-------------|-------------|-------------|
| SPIRE1     | ENSG00000134278.15 | 3.653993898 | 5.794556103 | 7.350431607 |
| MED16      | ENSG00000175221.14 | 5.124517412 | 4.50706095  | 4.665780131 |
| SPC24      | ENSG00000161888.11 | 5.631689067 | 3.774088068 | 4.018081502 |
| BORCS8     | ENSG00000254901.7  | 4.905781853 | 5.325130628 | 3.657830986 |
| EBPL       | ENSG00000123179.13 | 5.654311683 | 4.352036315 | 3.78182374  |
| SSNA1      | ENSG00000176101.11 | 5.771841697 | 5.308900645 | 4.12222465  |
| RBM15      | ENSG00000162775.14 | 4.310769827 | 3.733150799 | 3.664606118 |
| TBC1D13    | ENSG00000107021.15 | 5.312289177 | 5.506495362 | 3.586665798 |
| SLC25A33   | ENSG00000171612.6  | 3.950047274 | 4.069726304 | 4.44662141  |
| ATG16L1    | ENSG00000085978.21 | 4.707469999 | 4.358440946 | 3.949379514 |
| LGALS8     | ENSG00000116977.18 | 5.81018831  | 5.167926783 | 5.570811138 |
| IFT88      | ENSG00000032742.17 | 4.276839825 | 3.663962337 | 4.178495179 |
| MID1IP1    | ENSG00000165175.15 | 4.923341692 | 4.068855042 | 6.693612099 |
| DTL        | ENSG00000143476.17 | 5.678036957 | 3.59607563  | 4.084208192 |
| RPP40      | ENSG00000124787.13 | 4.493327484 | 4.017342269 | 4.261720628 |
| PIK3C3     | ENSG00000078142.12 | 4.668568718 | 5.046135525 | 4.236890576 |
| HMGB3      | ENSG00000029993.14 | 6.109194112 | 5.717324785 | 3.951887037 |
| ATG5       | ENSG00000057663.14 | 4.219063848 | 4.212387625 | 4.211320476 |
| AC092718.4 | ENSG00000261061.1  | 4.847916462 | 3.798587937 | 3.824637189 |
| GIT2       | ENSG00000139436.20 | 5.215886137 | 5.55583915  | 3.842081945 |
| SH3TC1     | ENSG00000125089.16 | 4.343307898 | 5.380641434 | 7.376897469 |
| ZNF608     | ENSG00000168916.15 | 4.297082385 | 4.21650236  | 5.236221769 |
| BTD        | ENSG00000169814.12 | 4.487566611 | 5.169705559 | 3.822061853 |
| ZSCAN21    | ENSG00000166529.14 | 3.746854236 | 4.07121297  | 3.888287782 |
| LIMK2      | ENSG00000182541.17 | 3.698942124 | 5.208828552 | 5.09909978  |
| ZER1       | ENSG00000160445.10 | 4.975443839 | 5.110683819 | 4.026600977 |
| LPIN2      | ENSG00000101577.9  | 4.533078148 | 4.765497964 | 4.654018923 |
| VIPAS39    | ENSG00000151445.15 | 4.623043029 | 3.820547059 | 4.122584629 |
| SLC43A1    | ENSG00000149150.8  | 4.312527946 | 3.847247901 | 3.891831438 |
| KIZ        | ENSG00000088970.15 | 3.929196219 | 3.720644496 | 4.336587374 |
| LMO7       | ENSG00000136153.19 | 3.661533705 | 4.105565072 | 4.990382391 |
| NACC2      | ENSG00000148411.7  | 4.87754723  | 6.073002731 | 5.829060626 |
| RANGRF     | ENSG00000108961.13 | 5.687897123 | 3.874101994 | 5.385208547 |
| CCNYL1     | ENSG00000163249.11 | 4.431759766 | 5.245735673 | 4.364432931 |
| UBXN11     | ENSG00000158062.20 | 4.013236649 | 4.876060294 | 3.861752092 |
| KIAA1468   | ENSG00000134444.13 | 4.178487499 | 4.903772947 | 4.096208948 |
| HSPA14     | ENSG00000187522.14 | 5.562263743 | 4.531486559 | 3.843076029 |
| PRKAR2A    | ENSG00000114302.15 | 5.99630415  | 5.438875848 | 5.299927759 |
| DPYSL2     | ENSG00000092964.17 | 6.021753635 | 4.914403185 | 3.755615518 |
| ANKRD52    | ENSG00000139645.9  | 6.403723076 | 5.440844923 | 3.995693317 |
| GABARAPL1  | ENSG00000139112.10 | 3.859810313 | 5.680200681 | 7.202899345 |
| CENPQ      | ENSG00000031691.6  | 4.600088448 | 3.701138636 | 3.658296877 |
| KIF16B     | ENSG00000089177.18 | 3.973386975 | 4.776658472 | 3.82689608  |
| CKAP2L     | ENSG00000169607.12 | 5.277834633 | 3.832020619 | 3.707566844 |
| OIP5-AS1   | ENSG00000247556.6  | 4.460132623 | 5.55364015  | 5.201540509 |
| NEDD1      | ENSG00000139350.11 | 5.670448205 | 4.670889762 | 3.691123372 |

|            |                    |             |             |             |
|------------|--------------------|-------------|-------------|-------------|
| ST7L       | ENSG00000007341.18 | 4.477361463 | 3.720375421 | 3.746645909 |
| WDHD1      | ENSG00000198554.11 | 3.666620504 | 3.674991634 | 3.728439451 |
| CDON       | ENSG00000064309.14 | 5.00701749  | 3.6940787   | 4.162360461 |
| IPO4       | ENSG00000196497.16 | 6.01941284  | 4.346087127 | 4.290261252 |
| USP13      | ENSG00000058056.8  | 3.734754632 | 3.570936355 | 4.64197938  |
| LRP12      | ENSG00000147650.11 | 4.333920233 | 4.680773631 | 5.87438246  |
| FRG1HP     | ENSG00000276291.5  | 5.334086801 | 4.140060329 | 4.431813673 |
| FAM160A2   | ENSG00000051009.10 | 3.996328908 | 5.444740676 | 4.839733122 |
| AC018638.5 | ENSG00000243679.1  | 3.640981229 | 5.15275093  | 4.746782614 |
| WDR70      | ENSG00000082068.8  | 5.172141328 | 4.364693389 | 3.852874904 |
| SUGT1      | ENSG00000165416.14 | 4.89422602  | 4.053000022 | 3.580915262 |
| ZNF621     | ENSG00000172888.11 | 4.708479682 | 5.280087547 | 5.288093461 |
| POP1       | ENSG00000104356.10 | 5.12989303  | 5.037337654 | 3.626150763 |
| MBIP       | ENSG00000151332.18 | 3.992795502 | 3.871792541 | 4.144167492 |
| TMEM68     | ENSG00000167904.14 | 4.528921367 | 4.494625168 | 4.852295661 |
| SLC39A11   | ENSG00000133195.11 | 4.162875686 | 4.849457773 | 6.085970625 |
| ZBTB48     | ENSG00000204859.12 | 4.350736245 | 4.285043712 | 4.325815259 |
| EBLN3P     | ENSG00000281649.1  | 5.536719937 | 5.500606064 | 4.616136717 |
| ZNF143     | ENSG00000166478.9  | 4.608927087 | 3.599224658 | 3.5831248   |
| DCAF5      | ENSG00000139990.17 | 4.184037354 | 4.227016199 | 4.438034802 |
| ADGRL1     | ENSG00000072071.16 | 5.730986481 | 4.679074458 | 4.487058835 |
| SNX25      | ENSG00000109762.15 | 4.774297315 | 3.777128259 | 5.50068772  |
| INO80      | ENSG00000128908.15 | 4.720265762 | 4.683245159 | 4.154040884 |
| QPCTL      | ENSG00000011478.11 | 4.671818574 | 5.249363423 | 3.777459378 |
| WDR4       | ENSG00000160193.11 | 4.676403109 | 4.223213321 | 3.68674228  |
| ATMIN      | ENSG00000166454.9  | 5.427710727 | 5.110269552 | 4.971798129 |
| ZGPAT      | ENSG00000197114.11 | 4.863428601 | 3.763558635 | 4.745226083 |
| WDR60      | ENSG00000126870.15 | 3.625483065 | 4.056089367 | 4.99804316  |
| TFAP2A     | ENSG00000137203.10 | 3.696850206 | 7.164528056 | 6.687067379 |
| ATF5       | ENSG00000169136.10 | 4.602714207 | 4.417373077 | 4.649856512 |
| HECTD4     | ENSG00000173064.12 | 4.082746731 | 4.579807965 | 3.692671928 |
| INPP4A     | ENSG00000040933.15 | 3.757266756 | 4.28263112  | 4.254787588 |
| IMPA2      | ENSG00000141401.11 | 5.101908226 | 5.923097622 | 3.762242123 |
| PLEKHJ1    | ENSG00000104886.11 | 3.736104001 | 4.396924319 | 3.993753979 |
| GPSM1      | ENSG00000160360.12 | 5.75383664  | 5.53569937  | 5.600984965 |
| PIGN       | ENSG00000197563.10 | 3.643842092 | 5.051306776 | 4.455534673 |
| RNF157     | ENSG00000141576.14 | 4.947089691 | 3.620197411 | 5.766902969 |
| UBALD1     | ENSG00000153443.12 | 5.701542528 | 4.892430545 | 4.918916507 |
| RTN4IP1    | ENSG00000130347.12 | 3.686426875 | 3.677730962 | 3.976444754 |
| RNF168     | ENSG00000163961.4  | 3.968778573 | 3.828981818 | 3.607929595 |
| KIAA1549L  | ENSG00000110427.14 | 5.522751402 | 6.285868139 | 3.626625601 |
| RUBCN      | ENSG00000145016.15 | 3.826017442 | 4.707998933 | 4.486717978 |
| BLOC1S4    | ENSG00000186222.4  | 4.888179553 | 3.828495577 | 5.327997861 |
| CRLF3      | ENSG00000176390.11 | 5.000413001 | 4.446769617 | 4.579623789 |
| WBP4       | ENSG00000120688.8  | 4.597437413 | 3.585298134 | 4.427726259 |
| PHLDA3     | ENSG00000174307.6  | 5.787250266 | 6.679015584 | 6.535193772 |



|           |                    |             |             |             |
|-----------|--------------------|-------------|-------------|-------------|
| MNAT1     | ENSG00000020426.10 | 4.545292635 | 3.619623352 | 4.142007594 |
| DLX1      | ENSG00000144355.14 | 4.494898673 | 4.007492673 | 6.36595637  |
| HERC4     | ENSG00000148634.15 | 4.42086223  | 4.732682964 | 4.968718716 |
| SLC7A6    | ENSG00000103064.13 | 4.660816936 | 4.403748182 | 4.985787653 |
| TPCN1     | ENSG00000186815.12 | 4.490912264 | 5.705337185 | 3.642406343 |
| NR2C1     | ENSG00000120798.16 | 4.685394646 | 4.455420657 | 3.615472166 |
| RARS2     | ENSG00000146282.17 | 5.525885711 | 5.037198206 | 4.436984921 |
| FCHSD1    | ENSG00000197948.10 | 3.632063578 | 4.807613573 | 5.603977101 |
| SMAP1     | ENSG00000112305.14 | 4.745730825 | 3.865931196 | 4.741142762 |
| TUBGCP4   | ENSG00000137822.12 | 4.927463787 | 4.469618089 | 4.156674881 |
| KLHL9     | ENSG00000198642.6  | 5.45738139  | 4.418808198 | 4.374836066 |
| UFL1      | ENSG00000014123.9  | 4.0057668   | 4.335119921 | 4.320095155 |
| LRFN3     | ENSG00000126243.8  | 4.360802092 | 5.485615014 | 4.602696538 |
| RAB17     | ENSG00000124839.12 | 4.041508647 | 6.503646944 | 6.031032769 |
| SGPL1     | ENSG00000166224.16 | 4.388069115 | 4.424178614 | 4.445658535 |
| TANGO6    | ENSG00000103047.7  | 3.608376542 | 4.335966689 | 3.868683403 |
| MDM2      | ENSG00000135679.22 | 6.07377611  | 7.174625214 | 6.752684243 |
| GLCE      | ENSG00000138604.9  | 5.091712633 | 4.533948456 | 6.156008895 |
| CNST      | ENSG00000162852.13 | 5.553116982 | 3.605876262 | 5.454640359 |
| SLC25A10  | ENSG00000183048.11 | 5.495223697 | 4.044803009 | 3.806261393 |
| BAZ2B     | ENSG00000123636.17 | 3.953287184 | 5.3223033   | 5.537244819 |
| FBXL19    | ENSG00000099364.16 | 5.611279423 | 4.546188591 | 4.134558323 |
| HLCS      | ENSG00000159267.14 | 3.906290504 | 4.382004753 | 4.782949881 |
| UHRF1BP1L | ENSG00000111647.12 | 4.88045814  | 3.951700546 | 3.710798439 |
| BBS2      | ENSG00000125124.11 | 5.370854154 | 4.319919629 | 5.947174758 |
| KAT6A     | ENSG00000083168.9  | 4.796400636 | 4.327575645 | 5.092458631 |
| POLR3A    | ENSG00000148606.12 | 5.072378314 | 3.907009792 | 4.154368621 |
| ZSCAN25   | ENSG00000197037.10 | 4.018231109 | 4.413139659 | 3.563430312 |
| PIGF      | ENSG00000151665.12 | 4.894503625 | 4.683582893 | 3.656135348 |
| MAP2K4    | ENSG00000065559.14 | 4.692328228 | 3.79127795  | 5.047660495 |
| PPP1R3D   | ENSG00000132825.6  | 3.533904124 | 3.854894516 | 4.966969246 |
| TMCO4     | ENSG00000162542.13 | 4.056985103 | 4.397923021 | 4.419850723 |
| CD68      | ENSG00000129226.13 | 3.574143828 | 5.195549367 | 4.240480583 |
| TMEM161B  | ENSG00000164180.13 | 4.314748271 | 3.863964269 | 5.07540174  |
| SRBD1     | ENSG00000068784.12 | 4.657974687 | 4.533527383 | 3.53295844  |
| TSEN15    | ENSG00000198860.11 | 5.087540653 | 4.187568841 | 4.712934195 |
| TUBGCP5   | ENSG00000275835.4  | 4.586276859 | 4.463934294 | 3.65325134  |
| APBA3     | ENSG00000011132.11 | 4.059903236 | 3.845246768 | 3.969360349 |
| AHSA2     | ENSG00000173209.22 | 3.996019973 | 4.524374867 | 4.572586301 |
| SSH3      | ENSG00000172830.12 | 4.034765072 | 3.941896408 | 4.788649763 |
| ARID1B    | ENSG00000049618.22 | 4.586232133 | 4.63883808  | 4.74747619  |
| CORO7     | ENSG00000262246.5  | 4.578164372 | 4.599024799 | 4.639066515 |
| ANKRD50   | ENSG00000151458.11 | 5.813936564 | 3.664058379 | 3.883006536 |
| IFNGR1    | ENSG00000027697.13 | 4.371883963 | 5.509402139 | 5.087648325 |
| RCCD1     | ENSG00000166965.12 | 3.924195625 | 3.962042795 | 3.52758268  |
| RNF166    | ENSG00000158717.10 | 4.828910969 | 4.087131291 | 4.535837848 |

|            |                    |             |             |             |
|------------|--------------------|-------------|-------------|-------------|
| MLF1       | ENSG00000178053.17 | 4.326007309 | 4.387854296 | 4.231766025 |
| ATG2A      | ENSG00000110046.12 | 4.628809115 | 5.03351897  | 4.460495148 |
| PPOX       | ENSG00000143224.17 | 4.664270854 | 4.670716414 | 4.361678913 |
| YBX1P1     | ENSG00000224861.1  | 4.769870514 | 4.089859761 | 3.629501473 |
| PDK2       | ENSG00000005882.11 | 4.147291609 | 4.579904445 | 4.836102788 |
| TOPORS     | ENSG00000197579.7  | 5.346895208 | 4.139228306 | 3.672528486 |
| DNAJC24    | ENSG00000170946.14 | 4.557283046 | 4.828187771 | 4.650341519 |
| HMOX1      | ENSG00000100292.16 | 4.596090446 | 6.765992797 | 5.043436663 |
| CMC1       | ENSG00000187118.12 | 4.54614876  | 4.658453144 | 4.437609638 |
| GPR180     | ENSG00000152749.7  | 3.55827916  | 3.985626086 | 3.60430757  |
| WDR53      | ENSG00000185798.7  | 3.649135319 | 4.22085488  | 3.743555996 |
| DDX31      | ENSG00000125485.17 | 5.480841651 | 5.282246956 | 3.603741347 |
| ELK4       | ENSG00000158711.13 | 5.22171996  | 3.579960369 | 4.409029574 |
| ALDH4A1    | ENSG00000159423.16 | 3.701677711 | 4.126256053 | 5.056984675 |
| DEDD       | ENSG00000158796.16 | 5.424511348 | 5.34558598  | 4.530573383 |
| MYPOP      | ENSG00000176182.5  | 4.599841386 | 3.59310564  | 3.708100242 |
| ERICH1     | ENSG00000104714.13 | 3.772447909 | 4.151675055 | 4.210203465 |
| CCDC6      | ENSG00000108091.10 | 5.185097378 | 4.457891125 | 4.619871361 |
| LIN54      | ENSG00000189308.10 | 3.895485343 | 3.661348218 | 4.041465047 |
| AC007388.1 | ENSG00000231312.6  | 3.605221148 | 4.86368923  | 5.590899771 |
| PEAK1      | ENSG00000173517.10 | 3.897609372 | 4.5365158   | 5.138287202 |
| USP54      | ENSG00000166348.18 | 3.707064265 | 4.735399364 | 5.391587693 |
| ZBTB2      | ENSG00000181472.4  | 4.228601745 | 3.960137888 | 3.722662475 |
| TDRD7      | ENSG00000196116.7  | 3.533135423 | 7.019707867 | 4.839653805 |
| STK3       | ENSG00000104375.15 | 4.670887541 | 3.553440274 | 4.899175298 |
| RSRP1      | ENSG00000117616.17 | 4.068606571 | 3.902461674 | 4.485342044 |
| MON1A      | ENSG00000164077.13 | 4.615126405 | 4.079093987 | 3.657006097 |
| BAG5       | ENSG00000166170.9  | 4.978471247 | 4.907591252 | 3.528054731 |
| HDAC4      | ENSG00000068024.16 | 4.018354431 | 5.377574564 | 5.48820196  |
| ARHGEF18   | ENSG00000104880.17 | 4.487383103 | 4.7488575   | 4.43068811  |
| FAF1       | ENSG00000185104.19 | 5.316665544 | 4.409893819 | 4.527520377 |
| WASH6P     | ENSG00000182484.15 | 4.196133489 | 4.000992996 | 4.917378076 |
| DYRK3      | ENSG00000143479.15 | 5.01494352  | 4.568424104 | 3.710048079 |
| TONSL      | ENSG00000160949.16 | 4.91292529  | 3.656864116 | 3.732838376 |
| CENPI      | ENSG00000102384.13 | 3.897008211 | 4.66205219  | 3.621016289 |
| YARS2      | ENSG00000139131.12 | 5.433317806 | 4.866137306 | 3.800943397 |
| E4F1       | ENSG00000167967.15 | 4.15396016  | 3.810835694 | 3.678208861 |
| WDR76      | ENSG00000092470.11 | 4.809890165 | 3.619577845 | 4.386442174 |
| GDAP2      | ENSG00000196505.10 | 4.605700722 | 3.990692952 | 4.02585322  |
| ASCC1      | ENSG00000138303.17 | 4.357932604 | 4.096614539 | 5.325723274 |
| TGDS       | ENSG00000088451.10 | 5.338964551 | 4.892626538 | 4.188070638 |
| CEP350     | ENSG00000135837.15 | 4.926216318 | 4.615579471 | 4.364693755 |
| AVEN       | ENSG00000169857.7  | 3.798934327 | 3.897159736 | 3.736599759 |
| MOSPD1     | ENSG00000101928.12 | 3.743374709 | 5.170637896 | 5.334548704 |
| KATNA1     | ENSG00000186625.13 | 4.600783086 | 3.94656543  | 4.221970496 |
| ASF1B      | ENSG00000105011.8  | 6.487723018 | 5.181230226 | 3.538787021 |

|            |                    |             |             |             |
|------------|--------------------|-------------|-------------|-------------|
| SNORA67    | ENSG00000277985.1  | 4.719756822 | 3.930849138 | 4.675073769 |
| FOXJ2      | ENSG00000065970.8  | 4.418032149 | 3.822022772 | 4.818519894 |
| POMZP3     | ENSG00000146707.14 | 4.978698653 | 4.824073785 | 4.47527804  |
| PATZ1      | ENSG00000100105.17 | 5.328213052 | 4.061586652 | 5.246322151 |
| MARS2      | ENSG00000247626.4  | 4.216563933 | 4.772063086 | 4.000786379 |
| ADK        | ENSG00000156110.13 | 5.065953353 | 4.046754841 | 3.83379852  |
| KCTD18     | ENSG00000155729.12 | 3.561783984 | 4.215981251 | 4.23530203  |
| CTDSPL2    | ENSG00000137770.13 | 5.112592329 | 4.039199837 | 4.009142768 |
| DCUN1D4    | ENSG00000109184.14 | 5.057438415 | 4.771246594 | 4.588920995 |
| NUTM2B-AS1 | ENSG00000225484.6  | 5.166216584 | 4.03212675  | 4.359904298 |
| FAM35A     | ENSG00000122376.11 | 5.272133178 | 3.971313053 | 4.17210644  |
| KIF3A      | ENSG00000131437.15 | 4.386486565 | 3.549284494 | 5.193752356 |
| FAM214B    | ENSG00000005238.19 | 4.746203935 | 4.637845554 | 4.128798188 |
| FOXN3      | ENSG00000053254.15 | 4.350446812 | 3.57266159  | 4.116296533 |
| NUDCD1     | ENSG00000120526.10 | 5.381053412 | 4.522387612 | 3.706716178 |
| TMEM175    | ENSG00000127419.16 | 4.372722642 | 3.592791406 | 6.137881341 |
| SNAPC1     | ENSG00000023608.4  | 5.107015401 | 4.820530039 | 3.515692232 |
| PARG       | ENSG00000227345.8  | 4.661074869 | 3.903246113 | 4.102431212 |
| RCHY1      | ENSG00000163743.13 | 4.0421259   | 4.248637345 | 3.85536255  |
| CRELD1     | ENSG00000163703.17 | 3.626538998 | 4.356944617 | 4.617877683 |
| ZNF362     | ENSG00000160094.14 | 4.716957336 | 4.156522282 | 3.577067381 |
| TMEM135    | ENSG00000166575.16 | 4.91011354  | 3.626240285 | 4.377034493 |
| BLOC1S6    | ENSG00000104164.10 | 5.952973287 | 6.084405857 | 5.803243465 |
| COQ7       | ENSG00000167186.10 | 4.316744422 | 3.659414078 | 4.704023474 |
| PDS5B      | ENSG00000083642.18 | 4.987769641 | 4.301607341 | 3.503209226 |
| CDCA3      | ENSG00000111665.11 | 5.661764044 | 4.408326464 | 3.665783169 |
| RICTOR     | ENSG00000164327.12 | 4.253015773 | 4.447476774 | 3.958632848 |
| ILF3-AS1   | ENSG00000267100.1  | 4.974701583 | 5.103980322 | 4.164911442 |
| KLF10      | ENSG00000155090.14 | 5.058415659 | 3.511713102 | 4.962415601 |
| CBWD2      | ENSG00000136682.14 | 4.238001161 | 4.153722645 | 3.564157551 |
| ETAA1      | ENSG00000143971.7  | 4.519774185 | 4.575492285 | 3.526728616 |
| CEP120     | ENSG00000168944.15 | 4.396140769 | 3.57227282  | 3.707059324 |
| PDE4DIP    | ENSG00000178104.19 | 3.542978143 | 5.088213264 | 4.487243257 |
| ZDHHC13    | ENSG00000177054.13 | 3.846129985 | 4.398134887 | 4.248337084 |
| MED7       | ENSG00000155868.7  | 3.793950788 | 3.917361986 | 4.05886107  |
| PLA2G12A   | ENSG00000123739.10 | 3.866474909 | 3.490830658 | 5.422441106 |
| PLXNB3     | ENSG00000198753.11 | 5.048661238 | 5.90595263  | 4.760486196 |
| RNF113A    | ENSG00000125352.5  | 4.900914639 | 5.254227992 | 4.908505658 |
| BTBD3      | ENSG00000132640.14 | 6.567733014 | 5.88083011  | 4.57159962  |
| FKBP11     | ENSG00000134285.10 | 5.467773997 | 5.364945892 | 3.725215146 |
| PRKAB2     | ENSG00000131791.7  | 3.998342231 | 4.463822145 | 3.796016105 |
| TRIM13     | ENSG00000204977.9  | 5.188125833 | 3.834618469 | 4.474781668 |
| TMEM104    | ENSG00000109066.13 | 3.784582038 | 4.714657562 | 3.881270766 |
| AC068152.1 | ENSG00000262879.5  | 4.330479163 | 4.369148081 | 4.481433856 |
| NME6       | ENSG00000172113.8  | 4.514186998 | 4.678862825 | 4.451223682 |
| SNHG9      | ENSG00000255198.4  | 4.649847208 | 4.383111714 | 3.753107124 |

|           |                    |             |             |             |
|-----------|--------------------|-------------|-------------|-------------|
| USPL1     | ENSG00000132952.11 | 4.081838888 | 3.666923063 | 3.557875579 |
| TRMT2B    | ENSG00000188917.14 | 3.627077374 | 3.8737386   | 5.091100006 |
| ANKH      | ENSG00000154122.12 | 6.925523376 | 5.583440171 | 7.305927441 |
| DAB2IP    | ENSG00000136848.16 | 4.659319203 | 5.604409739 | 6.271861377 |
| MIB2      | ENSG00000197530.12 | 4.674951052 | 5.481360645 | 5.453214048 |
| FAM173A   | ENSG00000103254.9  | 5.036958244 | 3.725311117 | 4.292676694 |
| ZNF32     | ENSG00000169740.13 | 5.000052961 | 3.533323867 | 4.396545997 |
| POLR2J4   | ENSG00000272655.2  | 4.158129773 | 3.785069483 | 3.742394857 |
| PGAP2     | ENSG00000148985.19 | 3.930486225 | 5.250545378 | 4.866172993 |
| CDCA7     | ENSG00000144354.13 | 4.240517711 | 4.769608271 | 3.780203601 |
| TMEM134   | ENSG00000172663.8  | 3.957914208 | 3.810699061 | 4.065078373 |
| ARHGAP35  | ENSG00000160007.18 | 5.767023629 | 4.566589177 | 5.292425826 |
| PLSCR3    | ENSG00000187838.16 | 4.894354233 | 4.0593169   | 4.157385651 |
| ABCB10    | ENSG00000135776.4  | 5.401577671 | 3.550305493 | 3.914100401 |
| DHRS7B    | ENSG00000109016.17 | 4.140346731 | 3.507438164 | 4.43502414  |
| MARCH2    | ENSG00000099785.10 | 3.570859962 | 4.905540291 | 4.68385851  |
| NR4A1     | ENSG00000123358.19 | 6.273060524 | 6.571347156 | 4.703124949 |
| CCDC137   | ENSG00000185298.12 | 5.967654356 | 4.538694835 | 4.459331007 |
| MROH1     | ENSG00000179832.17 | 3.500884859 | 4.692172974 | 4.692113382 |
| KIF18A    | ENSG00000121621.6  | 4.541250358 | 3.690199284 | 4.460268241 |
| FAM111A   | ENSG00000166801.15 | 3.897351371 | 3.761552757 | 4.202533431 |
| MPZL1     | ENSG00000197965.11 | 4.513625365 | 6.319407068 | 3.637711702 |
| ALKBH4    | ENSG00000160993.3  | 4.412941256 | 4.590055697 | 3.713791329 |
| ZNF827    | ENSG00000151612.15 | 4.461271565 | 3.959801429 | 5.077654808 |
| NAA16     | ENSG00000172766.18 | 4.925084627 | 3.801091871 | 3.861667006 |
| KIAA0391  | ENSG00000100890.15 | 3.971280038 | 4.140318472 | 4.09917476  |
| CENPJ     | ENSG00000151849.14 | 4.884451827 | 4.009114234 | 3.592980884 |
| ZFYVE27   | ENSG00000155256.17 | 4.704381575 | 4.537827485 | 4.984912349 |
| OAS1      | ENSG00000089127.12 | 4.027063991 | 4.592572598 | 3.541133221 |
| ASF1A     | ENSG00000111875.7  | 5.575442576 | 4.074560758 | 3.560797501 |
| FBXO28    | ENSG00000143756.11 | 5.71244953  | 3.575388867 | 4.660533726 |
| TOM1L2    | ENSG00000175662.17 | 5.360646404 | 3.638475221 | 5.283641472 |
| C2orf76   | ENSG00000186132.14 | 3.70685567  | 3.568802393 | 4.31887998  |
| ZBTB40    | ENSG00000184677.16 | 4.052308031 | 4.479356531 | 4.236844457 |
| RNF138    | ENSG00000134758.13 | 5.308863896 | 4.488478876 | 4.222486086 |
| CENPO     | ENSG00000138092.10 | 4.808193663 | 4.76089202  | 3.513681935 |
| GLRX5     | ENSG00000182512.4  | 5.92200505  | 5.037160441 | 3.480250984 |
| TAF12     | ENSG00000120656.11 | 5.034778017 | 4.824094132 | 3.559258601 |
| ZNF337    | ENSG00000130684.13 | 4.056466873 | 4.436007339 | 3.509017021 |
| PHF21A    | ENSG00000135365.15 | 4.585747106 | 4.742937574 | 5.281161356 |
| PPP3CC    | ENSG00000120910.14 | 3.484738765 | 3.7580763   | 4.192349573 |
| ENDOV     | ENSG00000173818.16 | 3.901862215 | 3.63023718  | 3.896336702 |
| ABHD11    | ENSG00000106077.18 | 3.730260111 | 4.916875559 | 4.323103449 |
| ARHGAP11A | ENSG00000198826.10 | 5.165272991 | 3.944143661 | 3.966198865 |
| CCHCR1    | ENSG00000204536.13 | 3.57129748  | 3.905577437 | 3.901973657 |
| PCBP1-AS1 | ENSG00000179818.13 | 4.35930515  | 3.727054597 | 4.444775493 |

|          |                    |             |             |             |
|----------|--------------------|-------------|-------------|-------------|
| SAP30    | ENSG00000164105.3  | 5.36679777  | 3.975124834 | 3.81764733  |
| GALNS    | ENSG00000141012.12 | 4.05059     | 5.203972466 | 4.341226753 |
| SMG9     | ENSG00000105771.13 | 5.173012671 | 3.574493452 | 5.562609903 |
| ARFRP1   | ENSG00000101246.19 | 4.237589128 | 3.746744034 | 4.901918816 |
| CASD1    | ENSG00000127995.16 | 3.591185641 | 4.319545835 | 3.94167258  |
| FADS3    | ENSG00000221968.8  | 4.978690135 | 5.281593701 | 4.297095134 |
| FKBP14   | ENSG00000106080.10 | 4.031759654 | 5.821441048 | 4.172457772 |
| GAS2L1   | ENSG00000185340.15 | 3.984178055 | 5.861433363 | 4.186634475 |
| ERCC5    | ENSG00000134899.18 | 5.276129287 | 4.723586744 | 4.581687606 |
| LIMS1    | ENSG00000169756.16 | 4.906999247 | 3.567638114 | 5.395548201 |
| UMPS     | ENSG00000114491.13 | 5.411255275 | 4.406865583 | 3.541330212 |
| PCGF5    | ENSG00000180628.14 | 5.248362487 | 5.036873309 | 6.079282492 |
| ALG6     | ENSG00000088035.15 | 4.097058527 | 3.489122436 | 3.694039141 |
| MCTP1    | ENSG00000175471.19 | 3.899402638 | 3.607633786 | 5.247077612 |
| KIAA0556 | ENSG00000047578.12 | 3.966425571 | 4.012069326 | 4.585387715 |
| TMA16    | ENSG00000198498.9  | 5.133710328 | 4.083704442 | 3.511666266 |
| QPCT     | ENSG00000115828.15 | 3.54819422  | 9.545976077 | 9.754291957 |
| CLEC2B   | ENSG00000110852.4  | 3.831887605 | 3.670606298 | 3.618947043 |
| MND1     | ENSG00000121211.7  | 4.680161375 | 3.55084831  | 3.512665942 |
| HEIH     | ENSG00000278970.1  | 4.353137366 | 3.526635851 | 4.677634436 |
| SNHG12   | ENSG00000197989.13 | 5.133885717 | 3.639192712 | 4.75067806  |
| PIK3R1   | ENSG00000145675.14 | 4.025940448 | 4.432852507 | 4.423130679 |
| TRIM8    | ENSG00000171206.13 | 6.133477138 | 4.302713552 | 4.955492115 |
| POC1A    | ENSG00000164087.7  | 4.920719268 | 4.255221083 | 3.507950901 |
| TTC27    | ENSG00000018699.11 | 4.706010271 | 4.521121274 | 4.136745721 |
| SMURF2   | ENSG00000108854.15 | 5.018534819 | 3.998900373 | 5.071551872 |
| ACAD10   | ENSG00000111271.14 | 4.340969442 | 4.287291992 | 3.580547319 |
| IL10RB   | ENSG00000243646.9  | 3.902403209 | 4.718250095 | 4.279804203 |
| PACRGL   | ENSG00000163138.18 | 5.040167639 | 3.550134718 | 5.454100924 |
| APEX2    | ENSG00000169188.4  | 5.719046534 | 5.162192513 | 4.529201802 |
| EMSY     | ENSG00000158636.16 | 4.146090487 | 3.609189321 | 3.727706895 |
| ALKBH2   | ENSG00000189046.10 | 5.266646001 | 3.943090786 | 3.634369462 |
| STAT5A   | ENSG00000126561.16 | 3.886213322 | 4.3864361   | 4.392065524 |
| ZMYM6    | ENSG00000163867.16 | 3.523582682 | 4.06892153  | 3.99483261  |
| TGFB1    | ENSG00000105329.9  | 6.525180724 | 3.518225104 | 6.702512563 |
| TSPYL2   | ENSG00000184205.14 | 4.079500223 | 4.352608114 | 4.334526518 |
| AAMDC    | ENSG00000087884.14 | 3.638804583 | 4.465540047 | 4.891654786 |
| NPHP4    | ENSG00000131697.17 | 3.733873011 | 3.893444872 | 4.272125184 |
| SURF6    | ENSG00000148296.6  | 5.512341327 | 5.172702104 | 3.499308911 |
| KIF20B   | ENSG00000138182.14 | 5.790896157 | 3.687126073 | 3.559353669 |
| HYAL2    | ENSG00000068001.13 | 5.177641753 | 5.741372168 | 3.802230111 |
| IQSEC1   | ENSG00000144711.13 | 4.768519428 | 4.533924263 | 4.069562711 |
| PIAS2    | ENSG00000078043.15 | 3.809994553 | 4.211346492 | 3.786062311 |
| SMTN     | ENSG00000183963.18 | 5.353336241 | 4.163732703 | 3.737959645 |
| ERCC8    | ENSG00000049167.13 | 3.762860441 | 3.486734858 | 4.068648538 |
| ATP9A    | ENSG00000054793.13 | 4.582618804 | 3.605642528 | 7.41603475  |

|            |                    |             |             |             |
|------------|--------------------|-------------|-------------|-------------|
| CDK11A     | ENSG00000008128.22 | 3.937034558 | 3.551019959 | 4.382474718 |
| TMEM64     | ENSG00000180694.13 | 3.502286323 | 4.455524569 | 4.780449242 |
| UBE2Q2     | ENSG00000140367.11 | 4.939891402 | 4.469836739 | 4.213060131 |
| AC018645.2 | ENSG00000273014.1  | 3.829668387 | 4.049218538 | 3.983976418 |
| CSPP1      | ENSG00000104218.14 | 4.407027771 | 3.825170557 | 3.746273514 |
| NPRL2      | ENSG00000114388.12 | 4.794869703 | 4.134772413 | 3.60519507  |
| RAB27A     | ENSG00000069974.15 | 3.581372538 | 8.033240131 | 8.880547592 |
| C19orf25   | ENSG00000119559.15 | 4.263389443 | 4.245768972 | 4.727257818 |
| SEC24D     | ENSG00000150961.14 | 4.553247888 | 5.540830968 | 3.588672807 |
| FBXO22     | ENSG00000167196.13 | 4.276713099 | 4.994921856 | 4.807460965 |
| PXMP2      | ENSG00000176894.9  | 5.23279551  | 3.899281799 | 3.465650914 |
| H3F3AP4    | ENSG00000235655.3  | 5.948902515 | 3.772783608 | 4.322341759 |
| ZNF783     | ENSG00000204946.9  | 4.421467674 | 4.131539842 | 4.0951087   |
| HAGLR      | ENSG00000224189.6  | 3.96869655  | 6.099537279 | 5.361298088 |
| FNBP1L     | ENSG00000137942.16 | 3.765521484 | 5.375286329 | 4.253420666 |
| RABIF      | ENSG00000183155.4  | 4.227774112 | 3.945028391 | 3.512973586 |
| NCOA1      | ENSG00000084676.15 | 3.593544499 | 3.773660277 | 4.550709023 |
| ZNF689     | ENSG00000156853.12 | 4.03150175  | 5.7172467   | 3.948393821 |
| MTRF1      | ENSG00000120662.15 | 4.578368691 | 4.540843122 | 4.082925017 |
| CDC26      | ENSG00000176386.8  | 5.914051626 | 5.728296384 | 3.501023262 |
| PIGM       | ENSG00000143315.6  | 4.61021637  | 4.326760556 | 3.434850927 |
| ZXDC       | ENSG00000070476.14 | 4.805113309 | 4.271055475 | 6.091336631 |
| EPN2       | ENSG00000072134.15 | 4.507973992 | 4.254850952 | 3.639307887 |
| ROCK1      | ENSG00000067900.7  | 4.470870358 | 5.12794402  | 5.000047952 |
| FBF1       | ENSG00000188878.19 | 3.797793457 | 3.621130044 | 3.518415289 |
| AC005034.3 | ENSG00000270696.1  | 4.121826422 | 4.435101362 | 3.819703003 |
| CLEC16A    | ENSG00000038532.14 | 4.587548221 | 4.429304412 | 5.392553243 |
| SMAD3      | ENSG00000166949.15 | 5.661065371 | 3.717484915 | 4.840239407 |
| ZSWIM6     | ENSG00000130449.5  | 4.764712253 | 3.863000252 | 3.492766029 |
| AFAP1L1    | ENSG00000157510.13 | 4.571897941 | 3.525777418 | 3.663816422 |
| DMPK       | ENSG00000104936.17 | 4.528519228 | 4.292383955 | 4.340220007 |
| APC        | ENSG00000134982.16 | 4.896957519 | 4.368961751 | 4.034330685 |
| SETD4      | ENSG00000185917.13 | 3.590755568 | 4.287629187 | 4.155946922 |
| PPARD      | ENSG00000112033.13 | 3.737462209 | 4.760711737 | 5.867372607 |
| FBXO21     | ENSG00000135108.14 | 5.239866412 | 4.403376972 | 4.247178218 |
| SETD6      | ENSG00000103037.11 | 5.204800039 | 4.182413397 | 3.891952978 |
| DDX19B     | ENSG00000157349.16 | 4.432775799 | 4.103738399 | 4.620895955 |
| MYO1D      | ENSG00000176658.16 | 4.150815124 | 7.05363391  | 8.731154985 |
| R3HCC1L    | ENSG00000166024.13 | 4.080502514 | 4.130547283 | 4.090511873 |
| DAAM1      | ENSG00000100592.15 | 3.451763102 | 4.795097488 | 4.77050666  |
| SH3BP4     | ENSG00000130147.15 | 3.462267002 | 5.496888543 | 6.665777898 |
| LINC00963  | ENSG00000204054.13 | 5.074354145 | 6.689945137 | 4.726168955 |
| LYRM4      | ENSG00000214113.10 | 3.609855807 | 4.110585426 | 3.936903763 |
| FAT1       | ENSG00000083857.13 | 6.758723525 | 5.351308191 | 6.767042496 |
| RNPC3      | ENSG00000185946.15 | 3.997017328 | 3.611401832 | 3.675026397 |
| MFHAS1     | ENSG00000147324.10 | 3.51069394  | 3.432975357 | 4.472488495 |

|          |                    |             |             |             |
|----------|--------------------|-------------|-------------|-------------|
| SLC4A3   | ENSG00000114923.16 | 3.588541815 | 4.129963947 | 3.722008213 |
| RNPEPL1  | ENSG00000142327.12 | 3.848032545 | 5.450407048 | 6.967675493 |
| ALDH3A2  | ENSG00000072210.18 | 6.016272799 | 4.19878179  | 3.64147812  |
| INVS     | ENSG00000119509.12 | 4.101473559 | 5.109837308 | 3.510600538 |
| OSGEPL1  | ENSG00000128694.11 | 3.526476442 | 4.847140605 | 4.094044598 |
| TTC8     | ENSG00000165533.18 | 4.835807537 | 3.888220701 | 3.916754926 |
| VWA8     | ENSG00000102763.17 | 4.402395898 | 4.119071504 | 4.963537505 |
| SAMD9    | ENSG00000205413.7  | 4.271435289 | 4.746896976 | 3.56451059  |
| PEX11B   | ENSG00000131779.10 | 4.249674662 | 4.664851453 | 3.941796071 |
| CCNF     | ENSG00000162063.12 | 5.499735278 | 3.612540141 | 3.495674008 |
| PKD1P6   | ENSG00000250251.6  | 5.548708309 | 3.946873331 | 4.59441378  |
| SPATA2   | ENSG00000158480.10 | 4.684837551 | 4.94150657  | 5.564504414 |
| CEP85    | ENSG00000130695.14 | 4.759564114 | 3.887176819 | 3.473472143 |
| RDH13    | ENSG00000160439.15 | 4.019897699 | 3.601028302 | 5.38282735  |
| ARRB1    | ENSG00000137486.16 | 3.714413678 | 5.102067277 | 5.327338999 |
| TAF1     | ENSG00000147133.15 | 4.987994287 | 4.177960584 | 4.954328243 |
| NDOR1    | ENSG00000188566.13 | 5.093146092 | 5.087325462 | 3.642561629 |
| HDDC3    | ENSG00000184508.10 | 4.194210287 | 4.21808994  | 4.026556108 |
| BRPF1    | ENSG00000156983.15 | 4.450282856 | 4.402072302 | 3.560775508 |
| RGMB     | ENSG00000174136.11 | 4.484610972 | 3.970576301 | 4.687701088 |
| DYRK2    | ENSG00000127334.10 | 4.467209513 | 4.302708053 | 3.493053618 |
| KLF13    | ENSG00000169926.10 | 3.453296029 | 4.73918517  | 4.524819508 |
| CABLES1  | ENSG00000134508.12 | 4.099530001 | 6.755278729 | 6.901691283 |
| MTFMT    | ENSG00000103707.9  | 4.728702438 | 5.460858689 | 3.929365112 |
| SLC6A6   | ENSG00000131389.16 | 5.400954496 | 5.038510829 | 4.04591045  |
| SLC9A8   | ENSG00000197818.11 | 3.935240093 | 4.341654962 | 3.800876982 |
| RNF141   | ENSG00000110315.6  | 3.484458404 | 4.34013161  | 4.856713528 |
| SAP30L   | ENSG00000164576.11 | 4.248282049 | 3.487647272 | 4.719804994 |
| HMCN1    | ENSG00000143341.11 | 6.051342701 | 5.449327525 | 4.896357738 |
| INTS7    | ENSG00000143493.12 | 5.787322772 | 3.60794782  | 4.841218282 |
| TTC33    | ENSG00000113638.13 | 3.890988925 | 4.180596026 | 4.02154699  |
| HMGB1P5  | ENSG00000132967.9  | 5.772350052 | 4.202382175 | 3.621027932 |
| WDCP     | ENSG00000163026.11 | 4.264877106 | 3.914781027 | 3.431973748 |
| IQCE     | ENSG00000106012.17 | 3.70034836  | 5.042400917 | 3.651778675 |
| TMEM41B  | ENSG00000166471.10 | 3.801679449 | 3.791268978 | 4.89393837  |
| TEFM     | ENSG00000172171.10 | 4.364640618 | 4.629028831 | 4.131503872 |
| SMDT1    | ENSG00000183172.8  | 4.593419669 | 4.83059454  | 5.764506071 |
| DALRD3   | ENSG00000178149.16 | 4.761470717 | 4.6577284   | 3.497059169 |
| TRAF3IP1 | ENSG00000204104.11 | 3.614072994 | 4.454627994 | 3.426850502 |
| SLC38A6  | ENSG00000139974.15 | 3.879060917 | 4.319238464 | 4.404608209 |
| ZBTB18   | ENSG00000179456.10 | 4.617140216 | 3.547903449 | 3.46605294  |
| ZNF512   | ENSG00000243943.9  | 3.498531667 | 5.058617283 | 5.103804256 |
| SIK2     | ENSG00000170145.4  | 3.748451418 | 3.445026965 | 5.214373682 |
| PEMT     | ENSG00000133027.17 | 5.842041496 | 4.620300224 | 4.859176322 |
| TRMT13   | ENSG00000122435.9  | 4.910791799 | 3.701729058 | 3.586339432 |
| LDLRAP1  | ENSG00000157978.11 | 4.863751288 | 3.506693897 | 4.438254166 |

|           |                    |             |             |             |
|-----------|--------------------|-------------|-------------|-------------|
| LBX2      | ENSG00000179528.15 | 4.786297612 | 3.941554226 | 3.532119557 |
| DDX59     | ENSG00000118197.13 | 5.022950811 | 4.030239576 | 3.984829263 |
| CENPL     | ENSG00000120334.15 | 5.321369071 | 4.443982052 | 3.424848111 |
| NSUN3     | ENSG00000178694.9  | 3.881413157 | 3.597645286 | 3.988997541 |
| CERS6     | ENSG00000172292.14 | 3.439503951 | 5.081723809 | 4.634968353 |
| CBR4      | ENSG00000145439.11 | 4.486459698 | 4.218897628 | 4.932579663 |
| MYO1E     | ENSG00000157483.8  | 5.746758526 | 4.450673679 | 5.507410218 |
| MAP3K12   | ENSG00000139625.12 | 4.543394451 | 4.709351359 | 4.580970984 |
| LBX2-AS1  | ENSG00000257702.3  | 4.074897787 | 4.030611473 | 3.540344887 |
| OTUD6B    | ENSG00000155100.10 | 4.743118361 | 4.293911063 | 4.708595955 |
| TBC1D2B   | ENSG00000167202.11 | 3.881677544 | 4.552305538 | 4.619100031 |
| PIK3CA    | ENSG00000121879.3  | 4.422628327 | 4.720424179 | 4.666185344 |
| FUT11     | ENSG00000196968.10 | 4.836464121 | 3.429947256 | 4.560987292 |
| INTS2     | ENSG00000108506.11 | 4.054079594 | 4.074959282 | 4.0826747   |
| TTF1      | ENSG00000125482.12 | 5.766996855 | 5.017373453 | 3.560008097 |
| SOCS5     | ENSG00000171150.7  | 5.233976083 | 4.203729763 | 3.810001223 |
| OSBPL3    | ENSG00000070882.12 | 4.927199517 | 5.116331568 | 5.418774026 |
| SLC25A51  | ENSG00000122696.13 | 4.838381621 | 4.6487637   | 3.503670911 |
| LEPROT    | ENSG00000213625.8  | 5.387785465 | 3.896632877 | 3.743732339 |
| NUDT4     | ENSG00000173598.13 | 3.791805478 | 5.120426143 | 4.048298119 |
| ZNF318    | ENSG00000171467.15 | 3.960327601 | 3.692788371 | 4.478202829 |
| METTL1    | ENSG00000037897.16 | 4.429521395 | 4.14707777  | 5.57993734  |
| SGCB      | ENSG00000163069.12 | 5.381616469 | 4.799543753 | 3.432677627 |
| RNF115    | ENSG00000265491.4  | 4.064098172 | 4.114203662 | 3.983538429 |
| PYM1      | ENSG00000170473.16 | 5.38751605  | 4.505543729 | 3.804301937 |
| ZNF592    | ENSG00000166716.9  | 4.477226972 | 3.896680569 | 3.542428658 |
| MGA       | ENSG00000174197.16 | 4.159556563 | 4.202205352 | 4.245901037 |
| VEGFA     | ENSG00000112715.21 | 6.139205137 | 5.31730882  | 6.875886494 |
| FYTTD1    | ENSG00000122068.12 | 4.866804184 | 4.367376059 | 5.12471761  |
| CCDC93    | ENSG00000125633.10 | 3.462057129 | 5.4074022   | 5.880530916 |
| NUP37     | ENSG00000075188.8  | 6.063386888 | 5.42776728  | 3.521791059 |
| PLA2G16   | ENSG00000176485.11 | 4.246669464 | 4.776827138 | 4.689923076 |
| SYDE1     | ENSG00000105137.12 | 5.16590724  | 4.698100717 | 3.740103614 |
| UBE2E2    | ENSG00000182247.9  | 4.553317155 | 5.112989449 | 4.81789641  |
| GEMIN6    | ENSG00000152147.10 | 5.777763612 | 5.691499699 | 3.977220234 |
| GNE       | ENSG00000159921.14 | 6.962418953 | 4.05406958  | 3.913990774 |
| ELMOD2    | ENSG00000179387.9  | 3.729920291 | 4.062351989 | 5.073573595 |
| TMEM237   | ENSG00000155755.18 | 3.513078904 | 4.100328925 | 3.821775063 |
| HACD1     | ENSG00000165996.13 | 3.657262958 | 4.966599356 | 4.041951764 |
| SETD9     | ENSG00000155542.11 | 3.83419343  | 4.017151945 | 3.539190511 |
| RAB5B     | ENSG00000111540.15 | 4.200403492 | 4.995624292 | 5.087047254 |
| TCP11L1   | ENSG00000176148.15 | 4.553801713 | 3.91527178  | 4.932382062 |
| BCAS3     | ENSG00000141376.22 | 4.182062163 | 4.113190898 | 6.770452209 |
| CNRIP1    | ENSG00000119865.8  | 3.487348806 | 5.339769998 | 3.616732736 |
| LINC00339 | ENSG00000218510.7  | 4.695285636 | 5.529186558 | 4.115815482 |
| CMC4      | ENSG00000182712.15 | 4.76072207  | 3.823600933 | 4.790450054 |



|            |                    |             |             |             |
|------------|--------------------|-------------|-------------|-------------|
| LONRF1     | ENSG00000154359.12 | 3.773755154 | 6.424614128 | 7.089104676 |
| DTD2       | ENSG00000129480.12 | 3.575311901 | 3.78072244  | 4.140870937 |
| POC1B      | ENSG00000139323.13 | 3.822201621 | 4.542529513 | 3.493553919 |
| MAP3K10    | ENSG00000130758.7  | 4.09472234  | 5.576615782 | 3.835635317 |
| TP53INP2   | ENSG00000078804.12 | 3.438502647 | 5.55826456  | 7.337086952 |
| LAMTOR3    | ENSG00000109270.12 | 3.699327244 | 3.995389708 | 4.423834449 |
| FAM200A    | ENSG00000221909.2  | 3.988474493 | 4.40783955  | 3.474767104 |
| GTF2H4     | ENSG00000213780.10 | 4.126359133 | 4.404338684 | 4.324054463 |
| TCTN1      | ENSG00000204852.15 | 4.680719941 | 4.162401676 | 3.429136808 |
| SLC25A4    | ENSG00000151729.10 | 5.907497556 | 4.215421346 | 8.549920298 |
| SLC7A11    | ENSG00000151012.13 | 5.759542321 | 4.999239491 | 6.957068482 |
| S100PBP    | ENSG00000116497.17 | 4.35962549  | 4.203742563 | 4.437258037 |
| FSBP       | ENSG00000265817.2  | 4.714047897 | 3.783082063 | 3.71798349  |
| AP002360.2 | ENSG00000255135.3  | 3.919772635 | 3.497270271 | 4.356546135 |
| ZMYM5      | ENSG00000132950.18 | 4.060156741 | 3.655375689 | 3.964432959 |
| PDLIM5     | ENSG00000163110.14 | 4.794459102 | 4.520862672 | 4.740572049 |
| MAP4K2     | ENSG00000168067.11 | 4.971552657 | 4.652256086 | 4.317963387 |
| PDE4D      | ENSG00000113448.18 | 4.682971081 | 5.291374749 | 4.836835484 |
| PHF2       | ENSG00000197724.10 | 4.501226182 | 4.679791134 | 3.415277702 |
| NUMBL      | ENSG00000105245.9  | 4.684955689 | 5.321510574 | 3.482222575 |
| SDR39U1    | ENSG00000100445.17 | 4.74267152  | 3.778097586 | 4.183379815 |
| NDUFAF4    | ENSG00000123545.5  | 4.331770996 | 4.104508737 | 4.220982093 |
| NLN        | ENSG00000123213.22 | 3.847551582 | 4.108553828 | 3.425041095 |
| MYCBP      | ENSG00000214114.8  | 5.196591083 | 3.847906021 | 3.439255725 |
| PPP1R18    | ENSG00000146112.11 | 4.098450151 | 5.090939091 | 5.72602623  |
| RAD18      | ENSG00000070950.9  | 4.77158119  | 4.095123034 | 3.422698087 |
| MAD2L1     | ENSG00000164109.13 | 5.568641193 | 3.964179398 | 3.539739235 |
| FHL3       | ENSG00000183386.9  | 4.384908228 | 3.920442129 | 3.417505936 |
| AC008443.1 | ENSG00000233937.6  | 4.79975028  | 4.13488101  | 4.300445659 |
| ORMDL2     | ENSG00000123353.9  | 4.909115269 | 4.821575376 | 3.65170676  |
| SYNJ1      | ENSG00000159082.17 | 3.404258133 | 3.610327873 | 4.052246148 |
| ESS2       | ENSG00000100056.11 | 3.745411861 | 4.723632244 | 4.239458987 |
| ZBTB21     | ENSG00000173276.13 | 3.730689823 | 3.828380451 | 3.600210147 |
| FMNL3      | ENSG00000161791.13 | 4.366329478 | 3.860251262 | 3.451960392 |
| S100A16    | ENSG00000188643.10 | 7.571193387 | 5.10975117  | 4.261682368 |
| TYSND1     | ENSG00000156521.13 | 4.298870137 | 3.698381284 | 3.997214122 |
| MRPL50     | ENSG00000136897.7  | 5.026844379 | 5.187437676 | 3.437703489 |
| AC073896.4 | ENSG00000258199.1  | 3.933404769 | 3.914501106 | 3.823766063 |
| CCDC112    | ENSG00000164221.12 | 3.814723265 | 3.622418761 | 3.572039569 |
| ZNF266     | ENSG00000174652.17 | 4.762077443 | 4.331598126 | 4.567156567 |
| MAP7D3     | ENSG00000129680.15 | 4.857877377 | 4.580190434 | 3.463598967 |
| NAGPA      | ENSG00000103174.11 | 3.790318355 | 4.460444381 | 3.823076337 |
| MRE11      | ENSG00000020922.12 | 4.855463171 | 3.414728717 | 4.372823977 |
| USP25      | ENSG00000155313.15 | 3.470477612 | 4.429938363 | 5.310474712 |
| ZFX        | ENSG00000005889.15 | 4.620844257 | 3.602705084 | 4.532230188 |
| ST3GAL2    | ENSG00000157350.12 | 5.513505506 | 4.384847713 | 4.551570098 |

|            |                    |             |             |             |
|------------|--------------------|-------------|-------------|-------------|
| PLCD3      | ENSG00000161714.11 | 4.089944178 | 3.880682849 | 3.394766114 |
| CYLD       | ENSG00000083799.17 | 4.278859769 | 3.524359556 | 4.853383026 |
| ZNF395     | ENSG00000186918.13 | 5.004858392 | 3.959715565 | 4.534592443 |
| FASTKD1    | ENSG00000138399.17 | 3.526917786 | 5.895572572 | 5.962948293 |
| ADCY9      | ENSG00000162104.9  | 3.825163956 | 3.453885392 | 5.815626756 |
| ARSA       | ENSG00000100299.17 | 3.547560074 | 5.960554711 | 4.680891724 |
| HELLS      | ENSG00000119969.14 | 5.499122423 | 4.191163795 | 3.708948798 |
| MPP5       | ENSG00000072415.8  | 4.587337455 | 3.394432493 | 4.411353195 |
| CC2D2A     | ENSG00000048342.15 | 4.225690188 | 3.794888825 | 6.22209648  |
| STYX       | ENSG00000198252.11 | 3.770442985 | 3.475330383 | 4.096136369 |
| PLXNB1     | ENSG00000164050.12 | 4.715637851 | 4.286508668 | 4.66436378  |
| MAP2K5     | ENSG00000137764.19 | 5.186562578 | 4.202426662 | 5.784763555 |
| PASK       | ENSG00000115687.13 | 3.403011644 | 4.062180942 | 4.037128519 |
| IKBIP      | ENSG00000166130.14 | 5.603226018 | 6.458625654 | 3.480892005 |
| MSTO1      | ENSG00000125459.14 | 4.657996198 | 5.044144316 | 3.477593255 |
| IFI30      | ENSG00000216490.3  | 5.804433463 | 4.766605477 | 3.458286586 |
| GPALPP1    | ENSG00000133114.17 | 4.27399441  | 3.547330976 | 3.727593527 |
| DIAPH3     | ENSG00000139734.17 | 3.636621327 | 3.534509437 | 3.391954486 |
| TMEM150A   | ENSG00000168890.13 | 3.765867826 | 4.692756329 | 3.680727758 |
| CTTNBP2NL  | ENSG00000143079.14 | 4.160196316 | 3.944398472 | 3.799867957 |
| HIPK2      | ENSG00000064393.15 | 6.239116782 | 4.986161264 | 5.731985212 |
| ZNF507     | ENSG00000168813.16 | 4.524085098 | 3.850991032 | 3.598067119 |
| BRAP       | ENSG00000089234.15 | 4.70478023  | 4.350108571 | 3.472711534 |
| GSTZ1      | ENSG00000100577.18 | 3.510909588 | 4.000310797 | 3.557812623 |
| PDSS1      | ENSG00000148459.15 | 5.255049888 | 3.689470156 | 3.492133151 |
| CISD1      | ENSG00000122873.11 | 4.639624843 | 3.396698999 | 6.884378763 |
| THAP1      | ENSG00000131931.8  | 3.823251877 | 3.648650777 | 3.628685003 |
| ARMCX3     | ENSG00000102401.19 | 3.65240905  | 5.191725102 | 4.832287853 |
| CEP192     | ENSG00000101639.18 | 3.80383774  | 3.99124225  | 3.920280076 |
| APTR       | ENSG00000214293.8  | 3.447765284 | 4.824210066 | 4.432727808 |
| RLF        | ENSG00000117000.8  | 4.366084262 | 3.521901387 | 3.367995891 |
| TPM1       | ENSG00000140416.19 | 6.163150843 | 5.132192779 | 5.195061599 |
| SOCS7      | ENSG00000274211.4  | 4.596304399 | 3.895409823 | 4.883276155 |
| ZNF134     | ENSG00000213762.11 | 4.240323314 | 3.434071339 | 4.04929166  |
| CNTRL      | ENSG00000119397.16 | 5.173012921 | 4.045847944 | 3.438712279 |
| CEP89      | ENSG00000121289.17 | 4.620027635 | 4.142518233 | 4.165439876 |
| CDCA2      | ENSG00000184661.13 | 5.045780422 | 3.709540951 | 3.440157765 |
| AL590617.2 | ENSG00000225177.5  | 5.727425864 | 4.411178475 | 3.978157148 |
| TEP1       | ENSG00000129566.12 | 4.341859072 | 3.764508944 | 4.522092465 |
| NOCT       | ENSG00000151014.5  | 4.714776214 | 3.767219255 | 3.4056894   |
| METTL18    | ENSG00000171806.11 | 4.439254765 | 3.709620201 | 3.44536553  |
| AL445524.1 | ENSG00000233461.5  | 4.361398193 | 4.789590195 | 3.891594752 |
| WHRN       | ENSG00000095397.13 | 3.935081285 | 6.474759364 | 4.099146992 |
| DEDD2      | ENSG00000160570.13 | 4.491355508 | 4.895037305 | 4.384759587 |
| DDX51      | ENSG00000185163.9  | 3.835801785 | 3.475264226 | 4.566475868 |
| NFATC3     | ENSG00000072736.18 | 4.895960858 | 3.463233901 | 4.20422552  |

|           |                    |             |             |             |
|-----------|--------------------|-------------|-------------|-------------|
| TAMM41    | ENSG00000144559.10 | 4.992079119 | 4.766132788 | 3.407483669 |
| TBC1D8    | ENSG00000204634.12 | 4.896623716 | 4.682426813 | 3.961197225 |
| ARHGFEF25 | ENSG00000240771.6  | 4.621836111 | 4.02266713  | 6.457520955 |
| UNC119    | ENSG00000109103.11 | 4.171460138 | 5.104785886 | 5.013857712 |
| MARK4     | ENSG00000007047.14 | 4.515012838 | 4.256783996 | 5.296862059 |
| WBP1L     | ENSG00000166272.16 | 4.606097202 | 4.725849005 | 5.060753698 |
| C6orf203  | ENSG00000130349.9  | 4.748232349 | 4.138728352 | 3.427840657 |
| MAPK12    | ENSG00000188130.13 | 3.901311636 | 4.760843054 | 4.611925291 |
| PNRC1     | ENSG00000146278.10 | 5.145902031 | 5.047414333 | 5.410079034 |
| MXRA7     | ENSG00000182534.13 | 3.96071254  | 6.129952013 | 6.008999387 |
| PRIMPOL   | ENSG00000164306.10 | 4.438914832 | 3.42178456  | 4.044750994 |
| PARP12    | ENSG00000059378.12 | 4.608886788 | 5.00795484  | 4.470441886 |
| ABHD13    | ENSG00000139826.5  | 4.179637038 | 3.606514655 | 3.894266839 |
| GZF1      | ENSG00000125812.15 | 3.934084288 | 3.820639798 | 3.407851041 |
| CSNK1G1   | ENSG00000169118.17 | 4.160759373 | 4.96969968  | 4.323717721 |
| SH3BP5    | ENSG00000131370.15 | 4.534572231 | 7.989304853 | 4.432549526 |
| FLNB      | ENSG00000136068.14 | 6.250029254 | 5.577775658 | 3.465824715 |
| STRIP2    | ENSG00000128578.9  | 3.442039739 | 4.357209983 | 4.170629751 |
| MRRF      | ENSG00000148187.17 | 5.308309314 | 5.307947699 | 4.099103207 |
| GPATCH2   | ENSG00000092978.10 | 4.767802421 | 3.400392997 | 3.544412582 |
| NFKBIZ    | ENSG00000144802.11 | 3.532035157 | 6.028887558 | 3.749850934 |
| CYP4V2    | ENSG00000145476.15 | 3.545144569 | 3.855013436 | 4.187032688 |
| DYM       | ENSG00000141627.13 | 4.6336371   | 4.23308606  | 5.039954739 |
| BTN2A2    | ENSG00000124508.16 | 3.939012653 | 4.832100204 | 4.850972408 |
| CUL7      | ENSG00000044090.8  | 4.143912913 | 4.97458676  | 4.88595299  |
| RGP1      | ENSG00000107185.9  | 5.563998226 | 4.290421816 | 4.297583971 |
| PPM1D     | ENSG00000170836.11 | 4.340966909 | 3.837359764 | 4.150653098 |
| PLEKHA4   | ENSG00000105559.11 | 6.166949413 | 6.708340822 | 4.926251404 |
| FAM206A   | ENSG00000119328.11 | 5.128733484 | 5.453163927 | 3.401288534 |
| ZNF562    | ENSG00000171466.9  | 4.674305896 | 4.41154143  | 3.710752236 |
| DOCK4     | ENSG00000128512.20 | 5.565008544 | 4.009065676 | 4.787567862 |
| NXT1      | ENSG00000132661.3  | 5.44739768  | 5.289826362 | 3.482505859 |
| ABCB9     | ENSG00000150967.17 | 4.773463551 | 3.537355313 | 4.486463555 |
| SLC2A3    | ENSG00000059804.15 | 5.216184015 | 4.242562552 | 5.226945091 |
| SEPT6     | ENSG00000125354.22 | 4.370909421 | 4.956604709 | 4.489385381 |
| TADA2A    | ENSG00000276234.4  | 4.249349245 | 3.670256701 | 3.474695559 |
| SFRP1     | ENSG00000104332.11 | 7.636713837 | 5.170100755 | 8.501460688 |
| COG8      | ENSG00000272617.2  | 5.011024214 | 3.972421749 | 4.330925269 |
| POLR3G    | ENSG00000113356.11 | 5.584378294 | 5.018261272 | 5.598858759 |
| ANKMY2    | ENSG00000106524.8  | 3.433444792 | 5.074715862 | 5.024439859 |
| FBXO42    | ENSG00000037637.10 | 3.749033629 | 3.857434425 | 4.012760512 |
| SERGEF    | ENSG00000129158.10 | 4.443477627 | 4.672879857 | 4.790123396 |
| METTL22   | ENSG00000067365.14 | 3.656818625 | 3.895560089 | 4.425577449 |
| JRKL      | ENSG00000183340.6  | 4.795452995 | 3.379020814 | 4.875795047 |
| ZNF189    | ENSG00000136870.10 | 4.240133756 | 4.591392985 | 3.362347119 |
| ZNF358    | ENSG00000198816.6  | 5.604797432 | 4.3756701   | 4.973498135 |

|           |                    |             |             |             |
|-----------|--------------------|-------------|-------------|-------------|
| NSMCE3    | ENSG00000185115.5  | 3.358775832 | 4.450148705 | 3.950450274 |
| FBXO44    | ENSG00000132879.13 | 3.579821219 | 5.943353145 | 6.550730528 |
| MPI       | ENSG00000178802.17 | 5.034241496 | 4.876316678 | 3.470481524 |
| SLC35D1   | ENSG00000116704.7  | 4.072483039 | 3.593554602 | 3.519367845 |
| COQ2      | ENSG00000173085.13 | 4.525458019 | 4.078319697 | 3.364448978 |
| TTC31     | ENSG00000115282.19 | 4.739656005 | 3.921500493 | 3.704187901 |
| NLE1      | ENSG00000073536.17 | 4.79280708  | 4.623497894 | 4.184128436 |
| DPY19L3   | ENSG00000178904.18 | 4.091273577 | 3.87384324  | 3.662212738 |
| RPIA      | ENSG00000153574.8  | 5.316874988 | 4.904022315 | 3.37480318  |
| HAGHL     | ENSG00000103253.17 | 4.914533599 | 5.358221254 | 5.564017297 |
| CTBS      | ENSG00000117151.12 | 3.55586332  | 4.064454129 | 4.952556013 |
| MYO10     | ENSG00000145555.14 | 3.330298947 | 8.368373623 | 8.863461385 |
| SCO1      | ENSG00000133028.10 | 4.872586581 | 3.430287644 | 3.90926084  |
| C9orf85   | ENSG00000155621.14 | 4.668127097 | 4.650270743 | 3.571778763 |
| BBS10     | ENSG00000179941.6  | 4.38848977  | 3.975515543 | 4.334101156 |
| ZNF511    | ENSG00000198546.14 | 5.332497223 | 3.78923542  | 3.678321799 |
| CNNM4     | ENSG00000158158.11 | 3.397146748 | 3.678235266 | 4.181627573 |
| ABRAXAS2  | ENSG00000165660.7  | 5.041891328 | 3.792272094 | 4.219167995 |
| SEC61A2   | ENSG00000065665.20 | 3.561260206 | 4.143542951 | 4.197900159 |
| GMPPB     | ENSG00000173540.12 | 4.359405171 | 4.535255888 | 3.413684753 |
| RHBDD1    | ENSG00000144468.16 | 4.008561867 | 4.475377644 | 5.798144522 |
| UTP14C    | ENSG00000253797.2  | 4.065840938 | 3.94579224  | 3.96329826  |
| TRUB2     | ENSG00000167112.9  | 5.584801852 | 5.271548751 | 3.345687794 |
| UHRF1BP1  | ENSG00000065060.16 | 3.813199859 | 3.947124712 | 5.385757835 |
| SH3D19    | ENSG00000109686.17 | 4.86126532  | 4.051310053 | 4.902264227 |
| CLCN6     | ENSG00000011021.21 | 3.42842966  | 4.639163556 | 4.036925662 |
| SLC25A19  | ENSG00000125454.11 | 4.459501314 | 3.687256831 | 3.801551261 |
| DUSP3     | ENSG00000108861.8  | 4.577572054 | 4.875763002 | 5.66797649  |
| DEXI      | ENSG00000182108.9  | 3.425493931 | 4.56261866  | 4.765569707 |
| CHEK2     | ENSG00000183765.20 | 4.370875947 | 4.342614667 | 4.042925143 |
| TSC22D2   | ENSG00000196428.12 | 4.122865132 | 4.07286776  | 4.86897113  |
| CUTC      | ENSG00000119929.12 | 5.472370272 | 3.922224875 | 4.073860918 |
| RBBP9     | ENSG00000089050.15 | 4.78848887  | 4.520601088 | 3.33642459  |
| MTHFR     | ENSG00000177000.11 | 3.65870658  | 3.945204047 | 4.128140363 |
| IFI44     | ENSG00000137965.10 | 4.570241266 | 3.363850876 | 4.306297023 |
| FBXO33    | ENSG00000165355.7  | 3.818710136 | 3.693812546 | 3.811661531 |
| RAB30-AS1 | ENSG00000246067.7  | 4.407014253 | 3.654552338 | 3.984844233 |
| ARHGEF10  | ENSG00000104728.15 | 3.804303098 | 3.452687469 | 3.521156112 |
| SMIM10L1  | ENSG00000256537.4  | 4.330552632 | 3.753321641 | 5.497322575 |
| DGKD      | ENSG00000077044.10 | 4.904259431 | 4.046092186 | 4.772916296 |
| PLD1      | ENSG00000075651.15 | 3.408647086 | 5.41132426  | 5.306118661 |
| MED9      | ENSG00000141026.5  | 4.070985522 | 4.80885348  | 5.222545346 |
| ANAPC10   | ENSG00000164162.13 | 4.136897521 | 3.311395853 | 3.743712895 |
| ZDHHC24   | ENSG00000174165.7  | 3.358531871 | 3.874943841 | 4.33118665  |
| RAB38     | ENSG00000123892.11 | 5.038795143 | 7.454457897 | 8.014799754 |
| CCNT2     | ENSG00000082258.12 | 3.431259783 | 3.751851898 | 4.03349711  |

|            |                    |             |             |             |
|------------|--------------------|-------------|-------------|-------------|
| BCL6       | ENSG00000113916.17 | 4.266711845 | 4.089852258 | 4.491511045 |
| BAHD1      | ENSG00000140320.11 | 4.582021685 | 4.627903298 | 4.863205644 |
| DXO        | ENSG00000204348.9  | 3.565780328 | 3.840339034 | 4.051083637 |
| RCL1       | ENSG00000120158.11 | 5.460840026 | 3.787341089 | 3.366707579 |
| ZNF513     | ENSG00000163795.13 | 4.652812745 | 4.534011778 | 3.394155314 |
| AC027031.2 | ENSG00000254615.2  | 5.116235368 | 3.699225597 | 3.782926867 |
| FBXW4      | ENSG00000107829.13 | 4.190381558 | 3.650914166 | 4.118829135 |
| C11orf74   | ENSG00000166352.15 | 3.987448231 | 5.075227502 | 5.70501425  |
| MNS1       | ENSG00000138587.5  | 4.040007177 | 3.363012914 | 3.399737522 |
| WDR47      | ENSG00000085433.15 | 3.78301701  | 3.852687265 | 3.666296764 |
| NEIL2      | ENSG00000154328.15 | 3.729242082 | 3.52589947  | 4.98680136  |
| SETD1B     | ENSG00000139718.10 | 4.446147517 | 4.02703875  | 3.833820056 |
| SLC19A1    | ENSG00000173638.18 | 4.328349467 | 3.907875847 | 3.516791601 |
| FAM171B    | ENSG00000144369.12 | 3.53531747  | 3.902155332 | 6.676562515 |
| PRKAB1     | ENSG00000111725.10 | 5.018826747 | 4.427742009 | 5.601223528 |
| LMAN2L     | ENSG00000114988.11 | 4.057875065 | 4.539814705 | 3.839325768 |
| BRCC3      | ENSG00000185515.14 | 4.571434359 | 4.048414768 | 4.084391516 |
| SLC2A1     | ENSG00000117394.20 | 6.494452834 | 5.458695159 | 4.502993736 |
| FAM204A    | ENSG00000165669.13 | 4.278694881 | 3.735825727 | 4.511011681 |
| ANO6       | ENSG00000177119.15 | 5.659768381 | 5.46852205  | 3.304944053 |
| SGPP1      | ENSG00000126821.7  | 3.594820697 | 3.37268604  | 4.575673942 |
| NCEH1      | ENSG00000144959.9  | 3.428536813 | 4.197765487 | 5.186581777 |
| NEK2       | ENSG00000117650.12 | 6.063040329 | 3.358040666 | 3.963242081 |
| FAM118A    | ENSG00000100376.11 | 3.536958849 | 5.748370721 | 4.46866145  |
| LRR1       | ENSG00000165501.16 | 5.344483492 | 4.030285038 | 3.408768334 |
| ELMSAN1    | ENSG00000156030.13 | 5.337658741 | 3.464178892 | 4.981441478 |
| SPATC1L    | ENSG00000160284.14 | 4.198990589 | 4.495007646 | 4.729095412 |
| ZNF146     | ENSG00000167635.11 | 6.682101846 | 6.263134002 | 5.910254112 |
| ARHGAP31   | ENSG00000031081.10 | 4.088844735 | 4.492172995 | 4.732167295 |
| HPS6       | ENSG00000166189.7  | 4.904938532 | 4.005390406 | 3.471212922 |
| ARL6IP6    | ENSG00000177917.10 | 4.165027817 | 3.55058356  | 3.735136056 |
| ETFRF1     | ENSG00000205707.10 | 3.885161735 | 4.149577291 | 5.232241199 |
| OFD1       | ENSG00000046651.14 | 4.550826943 | 3.631250796 | 4.672310511 |
| TMEM80     | ENSG00000177042.14 | 3.628760688 | 4.005144742 | 3.354543287 |
| ZNF574     | ENSG00000105732.12 | 4.092094211 | 4.462655721 | 3.928824581 |
| ETFDH      | ENSG00000171503.11 | 3.862575883 | 3.618841904 | 4.281330926 |
| SPIN1      | ENSG00000106723.16 | 5.668429141 | 5.785120366 | 4.113484748 |
| CXorf38    | ENSG00000185753.12 | 4.545679451 | 3.745969039 | 3.340078696 |
| CITED2     | ENSG00000164442.9  | 4.022440878 | 3.380890652 | 3.927558158 |
| VPS37A     | ENSG00000155975.9  | 4.016159664 | 3.479784456 | 4.723778776 |
| ALKBH1     | ENSG00000100601.9  | 3.849692793 | 3.364029845 | 4.232995571 |
| C1QTNF1    | ENSG00000173918.14 | 3.462980172 | 5.505421082 | 6.976295396 |
| THUMP3-AS1 | ENSG00000206573.8  | 4.079315312 | 4.47415087  | 4.232034475 |
| WDSUB1     | ENSG00000196151.10 | 3.490774008 | 4.771325962 | 5.139114227 |
| GOLGA5     | ENSG00000066455.12 | 4.879371289 | 5.26698927  | 3.400402302 |
| HOTAIRM1_5 | ENSG00000277694.1  | 3.387563386 | 4.809967983 | 4.488781134 |

|            |                    |             |             |             |
|------------|--------------------|-------------|-------------|-------------|
| DHRS11     | ENSG00000278535.4  | 5.47723443  | 5.586746575 | 4.666813823 |
| ZCCHC24    | ENSG00000165424.6  | 6.721889722 | 4.421262149 | 5.000395319 |
| AL049840.3 | ENSG00000269940.1  | 4.173129831 | 4.189077602 | 3.366322921 |
| TMEM254    | ENSG00000133678.13 | 4.392662152 | 3.408245484 | 3.777862616 |
| RIMKLB     | ENSG00000166532.15 | 4.934762688 | 4.302026054 | 4.7130353   |
| HINFP      | ENSG00000172273.12 | 4.366905267 | 3.580906404 | 4.122244017 |
| DNAJB4     | ENSG00000162616.8  | 3.491171205 | 4.661145367 | 3.484981234 |
| TRIM14     | ENSG00000106785.14 | 4.321845737 | 4.141299391 | 3.328608017 |
| SKA1       | ENSG00000154839.9  | 3.861411896 | 4.494713009 | 3.375193149 |
| STAG3L3    | ENSG00000174353.17 | 3.660278166 | 3.694558416 | 3.767359409 |
| SATB2      | ENSG00000119042.16 | 3.745570999 | 4.337316671 | 4.106455247 |
| PTPN13     | ENSG00000163629.12 | 3.35636435  | 4.183175864 | 3.861632015 |
| MTPAP      | ENSG00000107951.14 | 3.986633798 | 4.003170134 | 3.879481661 |
| SSX2IP     | ENSG00000117155.16 | 4.436471839 | 3.412834249 | 3.320099336 |
| HDHD2      | ENSG00000167220.11 | 4.13360157  | 4.634573898 | 3.969855253 |
| POLH       | ENSG00000170734.11 | 4.194341239 | 4.292922536 | 4.686130003 |
| TSPAN31    | ENSG00000135452.9  | 4.946659462 | 4.073441192 | 6.350716397 |
| DHRS13     | ENSG00000167536.13 | 4.577235457 | 3.529718009 | 5.317909017 |
| SNRNP48    | ENSG00000168566.12 | 4.487349629 | 4.10340453  | 3.536348844 |
| TMEM251    | ENSG00000153485.5  | 4.222310332 | 5.069818321 | 4.530539326 |
| ZNF740     | ENSG00000139651.10 | 5.079842939 | 3.586629526 | 3.430615992 |
| C4orf33    | ENSG00000151470.12 | 3.355913284 | 3.663740957 | 4.372809332 |
| BAG1       | ENSG00000107262.19 | 5.162241748 | 4.878253017 | 3.679083858 |
| HOMER2     | ENSG00000103942.12 | 4.433228182 | 3.381257149 | 5.216792382 |
| MT-TH      | ENSG00000210176.1  | 3.311381473 | 4.817002292 | 4.205028656 |
| RPL32P3    | ENSG00000251474.6  | 4.03262407  | 4.215419437 | 3.974735524 |
| MEF2C      | ENSG00000081189.15 | 3.534881214 | 4.132604562 | 6.396194823 |
| ARID2      | ENSG00000189079.15 | 4.349920583 | 3.508868672 | 3.801926031 |
| EDRF1      | ENSG00000107938.17 | 5.3571606   | 3.827913473 | 3.711116658 |
| CDCA8      | ENSG00000134690.10 | 6.087049858 | 4.454686189 | 3.39031729  |
| CEP41      | ENSG00000106477.18 | 4.3675797   | 3.509375549 | 5.173972222 |
| EEF2K      | ENSG00000103319.11 | 5.233659402 | 4.735062397 | 3.433618412 |
| KIAA1841   | ENSG00000162929.13 | 3.378529062 | 4.105173503 | 3.327381474 |
| KDM5B      | ENSG00000117139.16 | 6.591182195 | 5.395225196 | 3.65336533  |
| ARSD       | ENSG00000006756.15 | 3.419354545 | 3.544721402 | 3.791578132 |
| TMCC1      | ENSG00000172765.16 | 3.913824351 | 3.64395151  | 3.870732553 |
| EXOSC6     | ENSG00000223496.2  | 5.441774811 | 3.978194007 | 5.608113379 |
| EPM2AIP1   | ENSG00000178567.7  | 4.040769979 | 4.105155044 | 3.657304995 |
| C1orf35    | ENSG00000143793.12 | 4.985309956 | 3.31605206  | 3.890387153 |
| CACUL1     | ENSG00000151893.14 | 4.608615053 | 3.997574216 | 4.65523161  |
| ZNF580     | ENSG00000213015.8  | 5.41926491  | 3.869905408 | 5.576405218 |
| ARMT1      | ENSG00000146476.10 | 5.018010753 | 4.666383097 | 4.218533901 |
| ABCC10     | ENSG00000124574.14 | 3.389457515 | 4.360852318 | 4.359551754 |
| CDKN2D     | ENSG00000129355.6  | 4.851409938 | 4.208360319 | 4.82670494  |
| ABHD15     | ENSG00000168792.4  | 4.031802448 | 4.334948067 | 3.941905116 |
| KLHL2      | ENSG00000109466.13 | 4.350041858 | 3.904081316 | 4.869227385 |

|            |                    |             |             |             |
|------------|--------------------|-------------|-------------|-------------|
| STIM2      | ENSG00000109689.15 | 5.418128616 | 3.692102638 | 6.909289912 |
| AL031587.5 | ENSG00000278948.1  | 4.261496592 | 3.618958191 | 4.437532886 |
| SDHAP1     | ENSG00000185485.14 | 3.28151795  | 4.169052109 | 3.976486307 |
| TUBA1A     | ENSG00000167552.13 | 5.560901235 | 6.255224613 | 3.808574481 |
| PDPR       | ENSG00000090857.13 | 6.095524082 | 3.587745424 | 5.82920232  |
| TTC13      | ENSG00000143643.12 | 4.727717268 | 3.844237468 | 3.369329019 |
| ACAD11     | ENSG00000240303.7  | 3.790192212 | 4.155755067 | 3.900236887 |
| BNC2       | ENSG00000173068.17 | 3.470405736 | 4.134833782 | 3.871143943 |
| DNAL4      | ENSG00000100246.12 | 3.421151657 | 3.768298641 | 4.905780033 |
| ATXN1L     | ENSG00000224470.7  | 4.297880247 | 4.715428229 | 4.443296126 |
| TSTD2      | ENSG00000136925.14 | 4.602333499 | 4.67920539  | 3.30125225  |
| WIPF2      | ENSG00000171475.13 | 5.024189028 | 5.6054467   | 5.484700978 |
| RCAN3      | ENSG00000117602.11 | 4.28072557  | 4.333661259 | 3.90810157  |
| POGLUT1    | ENSG00000163389.10 | 4.405197985 | 3.352105717 | 3.740785103 |
| NUTM2A-AS1 | ENSG00000223482.7  | 5.299993382 | 4.408338328 | 4.96741927  |
| SFI1       | ENSG00000198089.15 | 4.123523414 | 4.965490209 | 5.309924738 |
| FAM160B1   | ENSG00000151553.14 | 3.798090304 | 3.856440759 | 4.424605508 |
| ZBTB1      | ENSG00000126804.13 | 4.466031999 | 4.320450322 | 3.430337375 |
| ZNF224     | ENSG00000267680.5  | 4.146182572 | 3.342976897 | 3.921545837 |
| SNX10      | ENSG00000086300.15 | 5.392065775 | 5.821714103 | 7.255071918 |
| SKP2       | ENSG00000145604.15 | 6.035472762 | 5.179771778 | 3.377353392 |
| TRAPPC6B   | ENSG00000182400.14 | 4.241545789 | 3.308184606 | 4.926751999 |
| SOD2       | ENSG00000112096.16 | 4.843788822 | 4.294508939 | 4.155307325 |
| ALG11      | ENSG00000253710.2  | 3.853583981 | 3.847958042 | 3.292626521 |
| ELK3       | ENSG00000111145.7  | 6.308635201 | 4.448446832 | 3.3606826   |
| FARS2      | ENSG00000145982.11 | 3.722585527 | 4.06130401  | 4.128025857 |
| NF2        | ENSG00000186575.17 | 4.823775057 | 4.311724248 | 4.892993052 |
| FAM58A     | ENSG00000262919.7  | 4.356622908 | 5.153809526 | 4.15390575  |
| THAP3      | ENSG00000041988.15 | 4.435760396 | 3.609988836 | 4.326374315 |
| ADA        | ENSG00000196839.12 | 4.683644446 | 3.940563016 | 4.050899762 |
| USP20      | ENSG00000136878.12 | 4.27570901  | 4.796035784 | 3.647867959 |
| CAMK2G     | ENSG00000148660.20 | 3.87024537  | 3.357181935 | 3.820275297 |
| GLMN       | ENSG00000174842.16 | 4.31362273  | 4.126292052 | 3.346620385 |
| SNTA1      | ENSG00000101400.5  | 3.364214997 | 5.040212673 | 4.520570598 |
| PWWP2A     | ENSG00000170234.12 | 3.865792337 | 3.382399622 | 3.818848963 |
| ZNF226     | ENSG00000167380.16 | 4.261095962 | 3.428915707 | 4.135440434 |
| DTNB       | ENSG00000138101.18 | 3.369211471 | 3.97251189  | 4.350239702 |
| NSUN4      | ENSG00000117481.10 | 4.553131276 | 4.391959133 | 3.372464771 |
| AL355338.1 | ENSG00000274605.1  | 4.601337521 | 3.781149495 | 4.214108162 |
| SMYD3      | ENSG00000185420.18 | 4.32524937  | 3.287469461 | 3.835814621 |
| BAIAP2-AS1 | ENSG00000226137.5  | 3.270765555 | 3.908800489 | 5.363064741 |
| ZNF281     | ENSG00000162702.7  | 4.868035379 | 4.741895835 | 3.973762903 |
| DCTN5      | ENSG00000166847.9  | 4.523752497 | 4.049284201 | 4.24607327  |
| AC069544.2 | ENSG00000284024.1  | 3.746438452 | 3.840735209 | 3.443647759 |
| SLC25A37   | ENSG00000147454.13 | 4.957007631 | 4.9553307   | 3.555843117 |
| GCLM       | ENSG00000023909.9  | 5.090016681 | 4.569847749 | 4.040289163 |

|            |                    |             |             |             |
|------------|--------------------|-------------|-------------|-------------|
| RELL2      | ENSG00000164620.8  | 4.00127465  | 4.690309815 | 4.403538544 |
| C9orf40    | ENSG00000135045.6  | 4.370945217 | 3.963066388 | 3.960731131 |
| IQGAP3     | ENSG00000183856.10 | 5.74116151  | 4.367337075 | 3.307105958 |
| HDAC10     | ENSG00000100429.17 | 3.81228945  | 4.751902623 | 4.580026314 |
| KDM6B      | ENSG00000132510.10 | 5.205698856 | 4.320816388 | 4.83717402  |
| RC3H1      | ENSG00000135870.11 | 3.607883988 | 3.831620201 | 3.277290912 |
| CWF19L2    | ENSG00000152404.15 | 4.543581179 | 3.567665427 | 3.567039168 |
| SCAMP1     | ENSG00000085365.17 | 4.380175992 | 3.786204434 | 4.356283786 |
| MOB3A      | ENSG00000172081.13 | 4.682519585 | 5.644607012 | 6.070820908 |
| ZNF865     | ENSG00000261221.3  | 4.373203332 | 3.334151915 | 4.073039548 |
| MED11      | ENSG00000161920.9  | 5.341635034 | 3.347887884 | 3.508747134 |
| NHEJ1      | ENSG00000187736.12 | 3.780383453 | 3.886757969 | 3.472926365 |
| PRRG1      | ENSG00000130962.17 | 3.305085903 | 3.478944197 | 3.289221981 |
| AP5Z1      | ENSG00000242802.6  | 3.616691702 | 5.671908284 | 4.722027599 |
| FAM220A    | ENSG00000178397.12 | 4.021168398 | 4.441979421 | 3.972593642 |
| SYNGR1     | ENSG00000100321.14 | 3.935221951 | 4.545481529 | 5.862703671 |
| WWC3       | ENSG00000047644.18 | 3.363819047 | 3.684368705 | 4.850863274 |
| ASB7       | ENSG00000183475.12 | 3.956201451 | 4.374286901 | 3.896887677 |
| TUBB6      | ENSG00000176014.12 | 5.092239806 | 5.699805558 | 3.31932163  |
| ZNF37A     | ENSG00000075407.18 | 4.012640628 | 3.677962302 | 3.889724055 |
| TRIM69     | ENSG00000185880.12 | 3.367823294 | 4.039590417 | 5.622661638 |
| CD3EAP     | ENSG00000117877.10 | 4.718924647 | 3.32435539  | 3.783781286 |
| FBXL18     | ENSG00000155034.18 | 4.850441257 | 4.41248428  | 3.400686413 |
| FAM214A    | ENSG00000047346.12 | 4.50276435  | 4.213490701 | 4.394172511 |
| ZNF444     | ENSG00000167685.14 | 4.137335191 | 3.750135681 | 3.731287346 |
| COQ10A     | ENSG00000135469.13 | 4.338837655 | 4.235679824 | 3.843168577 |
| MYNN       | ENSG00000085274.15 | 3.383125212 | 3.58658825  | 3.752011048 |
| AHCYL2     | ENSG00000158467.16 | 3.526344569 | 5.298168527 | 5.23012507  |
| SGO1       | ENSG00000129810.14 | 4.861942656 | 4.258205238 | 3.326729375 |
| FAM102B    | ENSG00000162636.15 | 3.312855516 | 4.385049306 | 3.918455292 |
| TBP        | ENSG00000112592.13 | 4.726371658 | 3.620993203 | 3.345225141 |
| UBQLN2     | ENSG00000188021.8  | 5.224567064 | 5.069267859 | 5.344921594 |
| ZNF195     | ENSG00000005801.16 | 4.617698359 | 4.628509119 | 3.687980733 |
| TGFB1I1    | ENSG00000140682.18 | 4.806798085 | 3.395620056 | 4.856034099 |
| STX17      | ENSG00000136874.10 | 4.274161743 | 4.112358703 | 3.6363786   |
| TSSC4      | ENSG00000184281.14 | 4.642866371 | 5.203217753 | 4.448176409 |
| DDX28      | ENSG00000182810.6  | 4.635668398 | 3.593363167 | 3.387784496 |
| EXOC6B     | ENSG00000144036.15 | 3.335715269 | 4.899281549 | 4.279838716 |
| PALLD      | ENSG00000129116.17 | 3.514419155 | 4.86683225  | 5.081167482 |
| ABHD4      | ENSG00000100439.10 | 3.303263592 | 3.812798937 | 4.911901919 |
| CCZ1       | ENSG00000122674.11 | 5.189027277 | 5.595450244 | 4.580710856 |
| MPP6       | ENSG00000105926.15 | 4.375191738 | 4.129775831 | 3.861112494 |
| CLIP2      | ENSG00000106665.15 | 3.761682509 | 5.105933466 | 4.087578689 |
| AC018638.2 | ENSG00000230715.3  | 3.526759136 | 5.071338188 | 4.832319435 |
| STARD10    | ENSG00000214530.8  | 3.468116952 | 4.614970744 | 5.015585924 |
| LLPH       | ENSG00000139233.6  | 4.485699706 | 4.039006205 | 3.511276581 |



|          |                    |             |             |             |
|----------|--------------------|-------------|-------------|-------------|
| CHKB     | ENSG00000100288.19 | 3.50455715  | 4.671112537 | 5.059277427 |
| BTAF1    | ENSG00000095564.13 | 4.940284133 | 4.522717533 | 4.414059242 |
| TOR1AIP1 | ENSG00000143337.18 | 4.396985535 | 4.924842173 | 4.165491895 |
| AP1G2    | ENSG00000213983.11 | 3.542471978 | 4.068798232 | 5.536457737 |
| BORA     | ENSG00000136122.15 | 4.236716773 | 3.339746617 | 3.313124196 |
| C18orf21 | ENSG00000141428.16 | 3.852706891 | 4.324231302 | 4.126613395 |
| PLGRKT   | ENSG00000107020.9  | 5.081306867 | 4.345193585 | 5.10957357  |
| HCG18    | ENSG00000231074.8  | 4.693534358 | 4.147347627 | 4.718717149 |
| ZNF700   | ENSG00000196757.7  | 4.185733316 | 3.56767084  | 4.246369864 |
| SLC25A26 | ENSG00000144741.17 | 4.165418342 | 4.233522967 | 4.406821184 |
| ERBB3    | ENSG00000065361.14 | 8.203852917 | 6.629393251 | 5.349050107 |
| POLM     | ENSG00000122678.16 | 4.096061047 | 4.497222252 | 3.710204095 |
| ZFYVE9   | ENSG00000157077.14 | 4.384749083 | 4.677588228 | 4.314639651 |
| NTPCR    | ENSG00000135778.11 | 4.517749059 | 3.531995362 | 4.857839571 |
| SKA3     | ENSG00000165480.15 | 4.985303549 | 3.301650029 | 3.517139566 |
| CUL9     | ENSG00000112659.13 | 3.91741796  | 4.576385248 | 4.19024283  |
| DYRK4    | ENSG00000010219.13 | 3.788567006 | 4.173624657 | 5.632977962 |
| ARRB2    | ENSG00000141480.17 | 5.386783664 | 3.555045438 | 4.959087315 |
| BMT2     | ENSG00000164603.11 | 3.317478403 | 3.676392994 | 3.427320705 |
| SLC38A9  | ENSG00000177058.11 | 4.920989896 | 3.642848352 | 3.35639486  |
| SIRT3    | ENSG00000142082.14 | 3.871532802 | 3.975750664 | 3.832902568 |
| C10orf76 | ENSG00000120029.12 | 4.616777935 | 3.919228875 | 4.752474531 |
| SPTLC2   | ENSG00000100596.6  | 4.256054628 | 3.366209709 | 5.136593704 |
| ZNF587   | ENSG00000198466.11 | 4.57134873  | 3.575702398 | 4.098746334 |
| TNS2     | ENSG00000111077.17 | 5.777169623 | 3.474513012 | 3.414156956 |
| KPTN     | ENSG00000118162.13 | 4.774071551 | 3.310021641 | 3.549737481 |
| RFX1     | ENSG00000132005.8  | 4.526557517 | 4.088283044 | 3.665343612 |
| CCL28    | ENSG00000151882.11 | 3.918235125 | 4.467766567 | 3.259347603 |
| PIGO     | ENSG00000165282.13 | 4.999850773 | 3.633941046 | 3.340741498 |
| PROSER3  | ENSG00000167595.14 | 4.667088942 | 4.310789216 | 3.735730142 |
| DECR2    | ENSG00000242612.6  | 3.913652152 | 4.644793492 | 3.330477274 |
| ITGA3    | ENSG00000005884.17 | 7.491731699 | 5.162477271 | 4.591103403 |
| BANP     | ENSG00000172530.20 | 4.462823589 | 4.154128305 | 4.686156375 |
| ISY1     | ENSG00000240682.9  | 6.504612954 | 5.457623089 | 3.847701409 |
| SLC5A3   | ENSG00000198743.6  | 6.348091894 | 3.320275078 | 5.993902714 |
| PDP2     | ENSG00000172840.6  | 4.763977763 | 3.97692273  | 4.485318729 |
| RAP2B    | ENSG00000181467.4  | 3.267777047 | 5.8983289   | 5.166304297 |
| EMP2     | ENSG00000213853.9  | 6.879636151 | 4.710984419 | 3.2131267   |
| C6orf136 | ENSG00000204564.11 | 3.926962764 | 3.790536931 | 4.759000997 |
| PHC1     | ENSG00000111752.10 | 4.926531852 | 4.997210365 | 5.551146413 |
| TLE1     | ENSG00000196781.14 | 5.064085394 | 6.205849535 | 3.354371852 |
| METTL4   | ENSG00000101574.14 | 3.713540141 | 4.429829672 | 3.963185214 |
| CNNM3    | ENSG00000168763.15 | 3.694161918 | 3.544235524 | 4.820881501 |
| SCOC     | ENSG00000153130.17 | 6.21647829  | 5.977352181 | 7.013590812 |
| ZNF576   | ENSG00000124444.15 | 4.050912884 | 3.43887165  | 3.827605115 |
| CAMK2D   | ENSG00000145349.16 | 4.406791002 | 3.513085196 | 5.207044056 |

|            |                    |             |             |             |
|------------|--------------------|-------------|-------------|-------------|
| PODXL2     | ENSG00000114631.10 | 4.326892148 | 6.941315293 | 3.486327747 |
| HSF4       | ENSG00000102878.16 | 3.397625378 | 4.217392978 | 5.392361932 |
| PSRC1      | ENSG00000134222.16 | 4.654591141 | 4.821038252 | 3.325163709 |
| ZHX1       | ENSG00000165156.14 | 4.42906427  | 3.721505614 | 3.908034851 |
| RPUSD2     | ENSG00000166133.17 | 4.716242709 | 4.600237214 | 3.730338878 |
| PIM2       | ENSG00000102096.9  | 4.898324404 | 4.281227369 | 3.894800286 |
| ANKRD46    | ENSG00000186106.11 | 3.778474629 | 3.562661277 | 3.635592908 |
| SRD5A3     | ENSG00000128039.10 | 3.607342499 | 3.211938309 | 3.742393765 |
| SLC35C1    | ENSG00000181830.8  | 4.40064354  | 4.747257611 | 4.549875221 |
| RNF8       | ENSG00000112130.16 | 4.114195976 | 4.370339359 | 4.688259613 |
| AGTPBP1    | ENSG00000135049.15 | 4.005706956 | 5.054068419 | 3.693874012 |
| HIP1R      | ENSG00000130787.13 | 4.293542011 | 4.370110722 | 6.78168233  |
| MOK        | ENSG00000080823.22 | 7.33205645  | 4.550138541 | 3.356582356 |
| TINF2      | ENSG00000092330.15 | 3.913451261 | 3.629843594 | 3.739209639 |
| PPP2R5B    | ENSG00000068971.13 | 3.800398396 | 3.917300322 | 4.55875496  |
| PDLIM3     | ENSG00000154553.13 | 4.283008895 | 4.766708941 | 4.250518219 |
| MSH5       | ENSG00000204410.14 | 4.431545886 | 4.95609389  | 3.983701758 |
| RAB3IL1    | ENSG00000167994.11 | 3.551681873 | 4.316598737 | 4.545637525 |
| SERTAD3    | ENSG00000167565.12 | 4.37917909  | 4.650026293 | 3.682170301 |
| CLP1       | ENSG00000172409.5  | 4.867437253 | 3.76712351  | 3.423701675 |
| TRIM3      | ENSG00000110171.19 | 3.424137498 | 4.66331741  | 3.871010442 |
| KLHL36     | ENSG00000135686.12 | 4.244724512 | 4.822812062 | 5.913906525 |
| MAP3K6     | ENSG00000142733.14 | 4.099042257 | 3.991703189 | 3.486693281 |
| D2HGDH     | ENSG00000180902.17 | 3.761895207 | 3.534404225 | 3.47897876  |
| CNEP1R1    | ENSG00000205423.11 | 3.781803972 | 4.252617764 | 4.178529813 |
| ERRFI1     | ENSG00000116285.12 | 7.697799335 | 3.668957409 | 5.822861231 |
| DNPH1      | ENSG00000112667.12 | 5.175645274 | 5.055771482 | 3.439840207 |
| OIP5       | ENSG00000104147.8  | 4.976464677 | 3.640406129 | 3.393766019 |
| SOCS4      | ENSG00000180008.8  | 4.366428955 | 4.189103851 | 4.157560419 |
| SLFN5      | ENSG00000166750.9  | 4.448580201 | 3.212242136 | 5.232870151 |
| TRMT11     | ENSG00000066651.18 | 4.739436118 | 3.812854835 | 3.711385385 |
| MED31      | ENSG00000108590.10 | 4.633969282 | 3.451213406 | 3.197349354 |
| COMMD5     | ENSG00000170619.9  | 5.618576287 | 3.818638998 | 4.555886046 |
| SGSH       | ENSG00000181523.12 | 4.308066399 | 4.766600052 | 4.517325424 |
| FAM193A    | ENSG00000125386.15 | 3.578015795 | 3.284260829 | 5.338322514 |
| DUSP22     | ENSG00000112679.14 | 3.741446628 | 3.983257324 | 4.277920499 |
| DHRX       | ENSG00000169084.13 | 3.303066864 | 3.392021675 | 5.053504296 |
| CENPE      | ENSG00000138778.11 | 5.054130386 | 3.480320426 | 3.387830512 |
| SIPA1L2    | ENSG00000116991.10 | 4.588521535 | 3.387900621 | 4.785512008 |
| AC004656.1 | ENSG00000260822.1  | 3.338471264 | 3.481413319 | 5.354490657 |
| LINC00662  | ENSG00000261824.6  | 4.750775659 | 4.929843919 | 5.417278011 |
| CENPBD1P1  | ENSG00000213753.10 | 5.227115155 | 4.29794384  | 4.692207206 |
| PIBF1      | ENSG00000083535.15 | 5.152711895 | 3.526802368 | 3.844560958 |
| MIR621     | ENSG00000207652.1  | 5.801324067 | 4.5749059   | 3.657023405 |
| CRAMP1     | ENSG00000007545.15 | 4.175153834 | 3.504827905 | 3.742763101 |
| MTCO3P12   | ENSG00000198744.5  | 3.211079774 | 4.452381525 | 11.29551669 |

|            |                    |             |             |             |
|------------|--------------------|-------------|-------------|-------------|
| BLOC1S5    | ENSG00000188428.19 | 3.674170389 | 3.288934073 | 4.16584445  |
| PTPRK      | ENSG00000152894.14 | 4.308526001 | 4.330850336 | 3.462619404 |
| HOTAIRM1_4 | ENSG00000274396.1  | 3.346845104 | 4.624154321 | 4.24476075  |
| ZNF148     | ENSG00000163848.19 | 4.198994128 | 4.171717113 | 4.116320244 |
| CEP152     | ENSG00000103995.13 | 4.306527367 | 4.206859442 | 3.374470294 |
| KLHDC8B    | ENSG00000185909.14 | 3.241587337 | 4.377930627 | 3.217784635 |
| ATP11A     | ENSG00000068650.18 | 5.054537245 | 5.714723602 | 6.296529527 |
| FBXO5      | ENSG00000112029.9  | 5.476272688 | 3.782013129 | 3.34762605  |
| MXI1       | ENSG00000119950.20 | 5.506954922 | 5.834357161 | 5.642757342 |
| ZMIZ1      | ENSG00000108175.16 | 6.008876489 | 5.053836237 | 4.815982007 |
| PFKFB2     | ENSG00000123836.14 | 3.396453285 | 3.992613206 | 4.336902211 |
| DYNC2H1    | ENSG00000187240.13 | 4.594948608 | 3.446669287 | 3.970284568 |
| ANGEL1     | ENSG00000013523.9  | 3.477069753 | 3.451263869 | 5.356953418 |
| NRSN2      | ENSG00000125841.12 | 4.467134807 | 4.891336178 | 3.579697316 |
| C2orf49    | ENSG00000135974.9  | 3.9108989   | 4.240728663 | 3.206206359 |
| UBR2       | ENSG00000024048.10 | 4.149844299 | 4.173111248 | 4.264999006 |
| TRIM35     | ENSG00000104228.12 | 3.933295077 | 4.041829955 | 3.978241421 |
| MYD88      | ENSG00000172936.12 | 4.34340047  | 5.163524515 | 3.965187652 |
| ZNF830     | ENSG00000198783.5  | 4.3992179   | 4.359811533 | 4.276803924 |
| BX890604.1 | ENSG00000205664.10 | 5.05428133  | 4.008270024 | 3.469463235 |
| GID4       | ENSG00000141034.9  | 4.714117666 | 3.58595795  | 3.806587635 |
| PRMT6      | ENSG00000198890.7  | 5.689496231 | 4.112408932 | 3.294882014 |
| OSBPL6     | ENSG00000079156.16 | 4.251997753 | 3.590228027 | 4.786845892 |
| SCML1      | ENSG00000047634.14 | 3.726415821 | 3.373475893 | 4.636094629 |
| ZNF426     | ENSG00000130818.11 | 3.305803384 | 3.827252831 | 3.350992417 |
| TTC26      | ENSG00000105948.13 | 4.535309742 | 3.797942294 | 3.403551997 |
| KIAA0895L  | ENSG00000196123.12 | 4.181088683 | 3.410138661 | 3.923090168 |
| HOOK2      | ENSG00000095066.11 | 3.781890012 | 4.122010658 | 3.784129025 |
| IFT122     | ENSG00000163913.11 | 4.32140922  | 3.709746778 | 3.326015007 |
| URB2       | ENSG00000135763.9  | 5.238671884 | 3.343951398 | 3.344013298 |
| PINX1      | ENSG00000254093.8  | 4.252751246 | 3.445064894 | 5.979551598 |
| INSIG2     | ENSG00000125629.14 | 3.208966026 | 4.572941575 | 5.305098731 |
| MIER2      | ENSG00000105556.11 | 4.31463904  | 4.100196752 | 3.435925892 |
| PARP3      | ENSG00000041880.14 | 4.273011018 | 4.482780744 | 3.862426138 |
| TSPAN9     | ENSG00000011105.12 | 3.297208688 | 4.993327279 | 5.499084555 |
| MMAB       | ENSG00000139428.11 | 4.228031857 | 3.797643564 | 3.354016753 |
| LRRC57     | ENSG00000180979.9  | 4.522059546 | 4.839288462 | 4.530693408 |
| TRAF5      | ENSG00000082512.14 | 4.268302925 | 3.32079627  | 4.259496527 |
| DUS4L      | ENSG00000105865.10 | 3.816786843 | 4.581807434 | 3.944264808 |
| GAB2       | ENSG00000033327.12 | 3.259795853 | 5.424891609 | 7.636836838 |
| AP5M1      | ENSG00000053770.11 | 3.249289632 | 3.95371518  | 4.179900228 |
| C2orf42    | ENSG00000115998.7  | 3.882498737 | 3.870888912 | 3.259172479 |
| GTPBP8     | ENSG00000163607.15 | 4.275116111 | 3.854210549 | 3.813507389 |
| EMC9       | ENSG00000100908.13 | 4.561578318 | 3.210482018 | 3.326130578 |
| ZNF219     | ENSG00000165804.15 | 3.231299606 | 3.925683253 | 4.030662743 |
| STMN3      | ENSG00000197457.9  | 3.301918339 | 5.185584264 | 6.190125131 |

|             |                    |             |             |             |
|-------------|--------------------|-------------|-------------|-------------|
| FNIP2       | ENSG00000052795.12 | 3.212738674 | 5.016802004 | 6.16777633  |
| ANKS3       | ENSG00000168096.14 | 3.73448002  | 3.393847762 | 3.665689999 |
| PICK1       | ENSG00000100151.15 | 4.65657302  | 5.025314111 | 5.227871087 |
| ITPR1       | ENSG00000150995.18 | 3.316984033 | 4.373860319 | 4.618979769 |
| POC5        | ENSG00000152359.14 | 4.833125984 | 3.897003517 | 3.32915643  |
| DBF4        | ENSG00000006634.7  | 4.177109919 | 3.816279598 | 3.298395216 |
| RBM7        | ENSG00000076053.10 | 4.623722679 | 3.484596274 | 4.017249546 |
| WASH3P      | ENSG00000185596.16 | 3.431078061 | 3.887820426 | 4.792673841 |
| C1orf159    | ENSG00000131591.17 | 4.271812283 | 4.428739244 | 3.920930192 |
| RBM12       | ENSG00000244462.7  | 4.335015553 | 3.461766039 | 3.971670545 |
| TBCCD1      | ENSG00000113838.12 | 3.681966955 | 3.561360544 | 3.432867009 |
| SLC25A29    | ENSG00000197119.12 | 5.252132026 | 6.029677848 | 3.353362208 |
| ELMOD3      | ENSG00000115459.17 | 3.358935388 | 3.995467484 | 3.931771665 |
| UBXN2B      | ENSG00000215114.8  | 4.90261396  | 4.500135559 | 4.961694843 |
| ZNF92       | ENSG00000146757.13 | 4.524350555 | 4.041828332 | 3.235625243 |
| TMEM206     | ENSG00000065600.12 | 4.34826178  | 3.396505206 | 4.029869558 |
| INPP1       | ENSG00000151689.12 | 3.7978145   | 3.834437387 | 5.03605909  |
| OR7E38P     | ENSG00000183444.10 | 4.701333645 | 4.52881799  | 3.389751527 |
| AC012313.1  | ENSG00000232098.3  | 4.937731446 | 3.831653081 | 3.709809462 |
| E2F3        | ENSG00000112242.14 | 4.297297361 | 3.861868348 | 3.511453094 |
| NFIL3       | ENSG00000165030.3  | 3.583496083 | 5.585167237 | 4.336096245 |
| UQCC3       | ENSG00000204922.4  | 3.547317444 | 3.179093226 | 3.623366348 |
| TMEM38B     | ENSG00000095209.11 | 4.101570927 | 5.222373967 | 3.700437618 |
| SH3TC2      | ENSG00000169247.11 | 4.669303764 | 3.642510941 | 3.927351559 |
| FGD1        | ENSG00000102302.7  | 3.231959279 | 5.045247247 | 4.941675157 |
| S100A6      | ENSG00000197956.9  | 11.195387   | 8.922809298 | 6.918212683 |
| SOCS6       | ENSG00000170677.5  | 4.321681532 | 4.669819739 | 4.337950287 |
| TCHP        | ENSG00000139437.17 | 4.640023793 | 4.188006232 | 3.265836395 |
| LINC01089   | ENSG00000212694.8  | 4.737276631 | 3.590944066 | 4.057251163 |
| LPCAT1      | ENSG00000153395.9  | 5.956914533 | 5.347249664 | 3.371302037 |
| FEM1A       | ENSG00000141965.4  | 4.876783658 | 3.964478319 | 3.671153334 |
| RNASEH1-AS1 | ENSG00000234171.2  | 5.146791261 | 3.260540374 | 3.988243917 |
| RANBP6      | ENSG00000137040.9  | 5.547580576 | 3.881077187 | 3.336236734 |
| HAUS3       | ENSG00000214367.7  | 3.414968395 | 3.214448409 | 4.956581837 |
| MIER1       | ENSG00000198160.14 | 4.876223705 | 4.166610459 | 3.849645496 |
| KCTD13      | ENSG00000174943.9  | 4.341620422 | 4.046720583 | 4.161603805 |
| CLSPN       | ENSG00000092853.13 | 5.8572453   | 4.417680431 | 3.306477516 |
| ZNF367      | ENSG00000165244.6  | 4.735402964 | 4.23177913  | 3.389524119 |
| CENPA       | ENSG00000115163.14 | 4.981549005 | 4.255151264 | 3.215929696 |
| FAM13A      | ENSG00000138640.14 | 3.655357151 | 3.67577356  | 4.835545662 |
| CAP2        | ENSG00000112186.11 | 3.2838463   | 4.7954611   | 4.163125968 |
| ARID4A      | ENSG00000032219.18 | 3.314490831 | 3.337559214 | 4.018037756 |
| CROCC       | ENSG00000058453.16 | 3.25265735  | 3.890910293 | 4.120851267 |
| NIPA1       | ENSG00000170113.15 | 3.943181647 | 4.874472133 | 4.819719476 |
| TRIQK       | ENSG00000205133.11 | 3.516176455 | 4.79970824  | 5.345310948 |
| OAS3        | ENSG00000111331.12 | 5.238573832 | 4.171685074 | 3.191623405 |

|            |                    |             |             |             |
|------------|--------------------|-------------|-------------|-------------|
| ACVR1B     | ENSG00000135503.12 | 4.297547028 | 3.951144853 | 4.196912851 |
| ANKRD44    | ENSG00000065413.18 | 3.189041334 | 4.91393454  | 5.641300973 |
| FBXW7      | ENSG00000109670.13 | 3.492397594 | 3.276259898 | 4.073839753 |
| SIGIRR     | ENSG00000185187.12 | 4.158707435 | 4.200944052 | 4.062367623 |
| USP46      | ENSG00000109189.12 | 3.457269134 | 3.833355088 | 5.004570859 |
| RRP15      | ENSG00000067533.5  | 4.609055743 | 3.17114275  | 4.046092873 |
| PSMB9      | ENSG00000240065.7  | 5.082556654 | 5.300839695 | 3.176402443 |
| RABGAP1L   | ENSG00000152061.23 | 3.802195351 | 3.799314383 | 4.338935203 |
| NUFIP1     | ENSG00000083635.7  | 4.375368789 | 3.185946277 | 3.500879224 |
| CEP78      | ENSG00000148019.12 | 4.741851989 | 4.487795333 | 3.165848228 |
| YOD1       | ENSG00000180667.10 | 3.796792309 | 3.627668586 | 3.200864335 |
| RND3       | ENSG00000115963.13 | 6.40200627  | 5.907097864 | 3.179964883 |
| GK5        | ENSG00000175066.15 | 3.495977039 | 4.19035042  | 3.376665028 |
| WDR59      | ENSG00000103091.14 | 4.201756556 | 4.714453788 | 4.232623706 |
| LRBA       | ENSG00000198589.10 | 3.146778318 | 4.565081214 | 5.071525135 |
| APBA2      | ENSG00000034053.14 | 4.989192637 | 5.126563751 | 5.27896295  |
| LARP1B     | ENSG00000138709.17 | 4.376325544 | 3.379017189 | 4.188315173 |
| ZNF579     | ENSG00000218891.4  | 4.066636498 | 3.60262219  | 4.338288579 |
| AC068768.1 | ENSG00000235423.8  | 5.448047239 | 5.50101807  | 3.207793107 |
| HIST3H2A   | ENSG00000181218.5  | 4.322126925 | 3.350094661 | 3.291977481 |
| MFSD3      | ENSG00000167700.8  | 4.394039903 | 4.219851118 | 3.290621293 |
| C1orf131   | ENSG00000143633.12 | 5.612838166 | 3.24928358  | 3.522792244 |
| MARCH9     | ENSG00000139266.5  | 4.828264569 | 4.801955172 | 7.344482082 |
| CCNE1      | ENSG00000105173.13 | 4.728705671 | 5.386097735 | 3.418208722 |
| SERINC5    | ENSG00000164300.16 | 3.135688731 | 6.527302459 | 6.418855052 |
| DIP2C      | ENSG00000151240.16 | 3.20923192  | 4.53757902  | 5.137918507 |
| PDLIM2     | ENSG00000120913.23 | 4.315659081 | 4.084025521 | 3.832150451 |
| GSTA4      | ENSG00000170899.10 | 3.97138238  | 3.513627085 | 4.083838874 |
| R3HDM2     | ENSG00000179912.20 | 5.478395983 | 4.794581015 | 4.644046872 |
| SVIP       | ENSG00000198168.8  | 3.976391494 | 4.462824464 | 5.279657097 |
| RNF103     | ENSG00000239305.6  | 4.034500118 | 4.126199589 | 4.338351852 |
| PRKCE      | ENSG00000171132.13 | 3.126551368 | 4.635037464 | 4.500157621 |
| TICAM1     | ENSG00000127666.9  | 4.339677684 | 4.952737644 | 4.581456569 |
| TADA1      | ENSG00000152382.5  | 4.839454808 | 3.652172044 | 3.298183141 |
| PEX6       | ENSG00000124587.13 | 4.603994168 | 3.921222237 | 3.891166927 |
| CMTR2      | ENSG00000180917.17 | 4.357788833 | 4.234239001 | 4.280632247 |
| KLC4       | ENSG00000137171.14 | 3.715103415 | 3.946978078 | 4.581441338 |
| NIPSNAP1   | ENSG00000184117.11 | 4.41139494  | 5.651223618 | 3.753988472 |
| TATDN2     | ENSG00000157014.10 | 4.709899257 | 4.628406236 | 4.245818403 |
| GPSM2      | ENSG00000121957.12 | 4.9697849   | 4.490619784 | 3.376697013 |
| LINS1      | ENSG00000140471.16 | 3.410557941 | 4.434544558 | 3.808938931 |
| IFIT3      | ENSG00000119917.13 | 4.577552219 | 3.111558076 | 3.99138122  |
| CEP295     | ENSG00000166004.14 | 3.865851997 | 3.187875401 | 3.249524583 |
| SLC17A5    | ENSG00000119899.12 | 3.17714808  | 6.18288431  | 4.187419041 |
| DCP1B      | ENSG00000151065.13 | 3.666370764 | 3.781221885 | 4.999561323 |
| ERCC4      | ENSG00000175595.14 | 4.095334185 | 3.753454654 | 3.377883089 |

|            |                    |             |             |             |
|------------|--------------------|-------------|-------------|-------------|
| CAAP1      | ENSG00000120159.11 | 5.58423698  | 3.894625198 | 4.158278204 |
| C7orf43    | ENSG00000146826.16 | 4.501306335 | 4.707402692 | 3.506378044 |
| KRBA1      | ENSG00000133619.17 | 3.686228869 | 3.938875968 | 4.301977897 |
| FIG4       | ENSG00000112367.10 | 3.207684206 | 4.287564108 | 4.708660654 |
| EIF4ENIF1  | ENSG00000184708.17 | 3.860843615 | 4.249443986 | 4.264619623 |
| DNAJC25    | ENSG00000059769.19 | 3.658002913 | 4.919666954 | 3.444972073 |
| RNF146     | ENSG00000118518.15 | 3.755974022 | 3.787078862 | 3.930992814 |
| ABCA5      | ENSG00000154265.15 | 3.250369413 | 3.608569876 | 5.028934896 |
| CBWD1      | ENSG00000172785.18 | 5.288959841 | 3.172670319 | 4.025868403 |
| TMEM50B    | ENSG00000142188.16 | 3.867939347 | 3.539895415 | 3.830801688 |
| FRS2       | ENSG00000166225.8  | 4.239244292 | 4.027655419 | 4.546337541 |
| WDR27      | ENSG00000184465.15 | 5.027946876 | 4.867269368 | 3.265751903 |
| TDG        | ENSG00000139372.14 | 5.23419022  | 4.049709366 | 3.383215373 |
| CEP97      | ENSG00000182504.10 | 3.763571296 | 3.518344034 | 3.150691095 |
| FBXO3      | ENSG00000110429.13 | 4.643537695 | 4.816286743 | 4.902111524 |
| CXXC5      | ENSG00000171604.11 | 4.58525681  | 3.581501092 | 3.493197161 |
| PRKD1      | ENSG00000184304.14 | 4.272369382 | 3.54126996  | 4.194933524 |
| ATP1B1     | ENSG00000143153.12 | 6.513391551 | 3.530587606 | 7.223400207 |
| ARHGAP11B  | ENSG00000187951.10 | 4.067276572 | 3.741499538 | 3.171392166 |
| PGPEP1     | ENSG00000130517.13 | 4.572089147 | 5.218756183 | 5.293088907 |
| INIP       | ENSG00000148153.13 | 4.605246726 | 4.574279454 | 3.229000702 |
| TRAPPC2    | ENSG00000196459.13 | 3.793944076 | 3.567689968 | 3.529402178 |
| NAA25      | ENSG00000111300.9  | 5.099038952 | 4.692349498 | 3.175326229 |
| FAM92A     | ENSG00000188343.12 | 5.249803921 | 5.262238552 | 4.232772713 |
| AL049840.4 | ENSG00000269958.1  | 4.00982074  | 4.23985212  | 3.15669051  |
| PIGP       | ENSG00000185808.13 | 4.012437262 | 4.190433795 | 3.986450904 |
| CPSF2      | ENSG00000165934.12 | 4.666639195 | 4.733345696 | 3.203146351 |
| TAF3       | ENSG00000165632.7  | 3.625727849 | 3.446617272 | 3.427392223 |
| PACS2      | ENSG00000179364.13 | 3.732297283 | 4.528914507 | 3.567972707 |
| PLK3       | ENSG00000173846.12 | 3.493044963 | 5.363424611 | 5.065591156 |
| ALDH16A1   | ENSG00000161618.9  | 5.778727011 | 4.630721014 | 3.300684229 |
| NECAP1     | ENSG00000089818.17 | 3.607967081 | 3.954982468 | 4.359198853 |
| ATG14      | ENSG00000126775.8  | 3.143788159 | 3.551007139 | 4.051253403 |
| CCDC66     | ENSG00000180376.16 | 4.128331785 | 3.847314889 | 3.18664678  |
| CFLAR      | ENSG00000003402.19 | 3.500787248 | 4.661472401 | 4.55492519  |
| VCPIP1     | ENSG00000175073.7  | 3.95409263  | 3.648482605 | 3.483530944 |
| ZFP41      | ENSG00000181638.17 | 3.280391959 | 3.801026512 | 3.534144847 |
| DDA1       | ENSG00000130311.10 | 5.941689901 | 4.904531772 | 4.417136076 |
| ERMP1      | ENSG00000099219.13 | 4.002921986 | 5.422780982 | 4.86512908  |
| LZTFL1     | ENSG00000163818.16 | 4.240206536 | 4.31145554  | 3.952101261 |
| EXOSC3     | ENSG00000107371.12 | 6.176715173 | 4.956264512 | 3.369599516 |
| MT-TP      | ENSG00000210196.2  | 4.744937766 | 6.196394559 | 3.63706223  |
| RASSF1     | ENSG00000068028.17 | 4.099095563 | 3.899434952 | 3.498086847 |
| TTC32      | ENSG00000183891.5  | 4.421608009 | 3.520680721 | 3.4324521   |
| KIAA1522   | ENSG00000162522.10 | 3.191501428 | 4.603746439 | 4.904253539 |
| ZNF480     | ENSG00000198464.13 | 3.663752888 | 3.484606101 | 3.540295379 |

|            |                    |             |             |             |
|------------|--------------------|-------------|-------------|-------------|
| C4orf46    | ENSG00000205208.4  | 3.897443433 | 3.643481296 | 3.133714404 |
| ZNF780A    | ENSG00000197782.14 | 3.753278828 | 4.108623004 | 3.474761944 |
| PISD       | ENSG00000241878.11 | 4.506622958 | 5.753912798 | 4.847098928 |
| AFF1       | ENSG00000172493.20 | 3.445690411 | 4.965399298 | 4.636476584 |
| C11orf54   | ENSG00000182919.14 | 3.939739077 | 3.447434186 | 4.610784254 |
| NR1D1      | ENSG00000126368.5  | 4.84378139  | 4.392736446 | 6.040397899 |
| FAM174A    | ENSG00000174132.8  | 4.347206684 | 4.069146842 | 4.709068782 |
| ZFP36      | ENSG00000128016.5  | 4.84793562  | 4.767401947 | 3.329453195 |
| ENDOG      | ENSG00000167136.6  | 5.004595779 | 4.196699511 | 3.290852326 |
| ZNF687     | ENSG00000143373.17 | 4.592296044 | 4.635783875 | 4.044354543 |
| GTF2IRD2B  | ENSG00000174428.16 | 3.640443139 | 3.599866624 | 3.166780481 |
| RAD51D     | ENSG00000185379.20 | 3.432922434 | 3.529599004 | 3.871294851 |
| PTPRM      | ENSG00000173482.16 | 3.203122887 | 6.864296792 | 5.301864929 |
| CHFR       | ENSG00000072609.17 | 4.514321934 | 4.343794029 | 3.112741712 |
| TXNL4B     | ENSG00000140830.8  | 5.125097642 | 3.718611294 | 4.051434879 |
| CAPRIN2    | ENSG00000110888.17 | 4.098950371 | 4.184065325 | 3.258988138 |
| SAPCD2     | ENSG00000186193.8  | 4.846851622 | 3.106901487 | 3.611813072 |
| LYPLAL1    | ENSG00000143353.11 | 4.373982369 | 3.851115891 | 4.638622509 |
| ANKS6      | ENSG00000165138.17 | 4.479716047 | 4.690839962 | 3.314048311 |
| PORCN      | ENSG00000102312.21 | 4.54896739  | 3.928272813 | 3.678405325 |
| HIST1H2BK  | ENSG00000197903.7  | 4.418818235 | 7.255443183 | 3.175334031 |
| ARSK       | ENSG00000164291.16 | 3.85323311  | 3.115923703 | 3.298486399 |
| SNAPC4     | ENSG00000165684.4  | 4.622597538 | 4.641475139 | 4.294701162 |
| SPICE1     | ENSG00000163611.11 | 4.242106806 | 3.660620628 | 3.705869418 |
| KIAA0586   | ENSG00000100578.14 | 5.040466941 | 3.418360749 | 4.43452323  |
| GIN53      | ENSG00000181938.13 | 5.146134549 | 3.262447786 | 3.104969043 |
| SH3BP5L    | ENSG00000175137.10 | 4.907645909 | 3.751794908 | 3.723253269 |
| STX1A      | ENSG00000106089.11 | 5.803793075 | 4.067311812 | 3.217164597 |
| CDC25A     | ENSG00000164045.11 | 5.678810891 | 4.292903768 | 3.159138775 |
| CLUAP1     | ENSG00000103351.12 | 4.284573326 | 3.643902773 | 4.185743819 |
| VPS13A     | ENSG00000197969.11 | 3.753360195 | 5.56954741  | 4.086999679 |
| BCL2A1     | ENSG00000140379.7  | 3.583636816 | 7.123265953 | 8.474811582 |
| CDKAL1     | ENSG00000145996.11 | 3.785357826 | 3.592925785 | 9.106810743 |
| ANKRD12    | ENSG00000101745.16 | 3.150642837 | 4.333612274 | 4.01611315  |
| AC026366.1 | ENSG00000240342.3  | 4.927503786 | 3.796524534 | 3.282171504 |
| BMPR2      | ENSG00000204217.13 | 3.715947306 | 6.233563973 | 7.989007066 |
| C12orf43   | ENSG00000157895.11 | 4.318291424 | 3.839185832 | 4.318955241 |
| SLC35B3    | ENSG00000124786.9  | 3.1723227   | 4.871472899 | 4.686523437 |
| DCAF17     | ENSG00000115827.13 | 3.095126802 | 3.988609981 | 4.158590454 |
| SNORA4     | ENSG00000263776.1  | 4.254420187 | 4.376637343 | 3.383954161 |
| ZNF714     | ENSG00000160352.15 | 4.016797721 | 3.253437948 | 3.540515253 |
| MAPK7      | ENSG00000166484.19 | 3.633404149 | 3.766368631 | 3.247774203 |
| FCHO2      | ENSG00000157107.13 | 3.72458758  | 3.142071924 | 3.304300985 |
| TPRN       | ENSG00000176058.11 | 4.536577599 | 4.817375387 | 3.455570632 |
| SNIP1      | ENSG00000163877.10 | 4.277649368 | 3.426615451 | 3.137741836 |
| DUS2       | ENSG00000167264.17 | 4.620668341 | 3.118903188 | 3.549170598 |

|             |                    |             |             |             |
|-------------|--------------------|-------------|-------------|-------------|
| IPP         | ENSG00000197429.10 | 3.91394001  | 4.014636573 | 3.794831929 |
| CCDC117     | ENSG00000159873.9  | 4.58022824  | 4.150704966 | 4.098547629 |
| ANKRA2      | ENSG00000164331.9  | 3.881736938 | 3.354076319 | 4.482257019 |
| RFT1        | ENSG00000163933.9  | 4.621742425 | 4.534009993 | 3.161694773 |
| BRWD3       | ENSG00000165288.10 | 4.154129975 | 4.163285838 | 3.370554863 |
| WAC-AS1     | ENSG00000254635.5  | 4.625694772 | 4.115489619 | 4.542763673 |
| RREB1       | ENSG00000124782.19 | 3.715354164 | 4.418167641 | 4.294926773 |
| FUT8        | ENSG00000033170.16 | 5.54738477  | 3.365832141 | 4.700450381 |
| ZFYVE26     | ENSG00000072121.15 | 3.121455746 | 4.314355117 | 4.539364903 |
| FRMD5       | ENSG00000171877.20 | 4.051099849 | 4.314206994 | 4.961038632 |
| SLC27A1     | ENSG00000130304.16 | 4.178506416 | 5.705959044 | 5.582134284 |
| HIVP2       | ENSG00000010818.9  | 3.456035082 | 3.781005035 | 3.387108557 |
| AIG1        | ENSG00000146416.17 | 3.967788366 | 3.446472957 | 3.66805354  |
| METTL21A    | ENSG00000144401.14 | 3.560920022 | 4.595698601 | 3.268945018 |
| PIK3CD      | ENSG00000171608.15 | 3.977516357 | 6.163718143 | 5.64621321  |
| STIM1       | ENSG00000167323.11 | 3.160916116 | 4.849227895 | 5.413824715 |
| TMEM263     | ENSG00000151135.9  | 4.05683165  | 4.732700329 | 4.956068232 |
| MED22       | ENSG00000148297.15 | 5.024640401 | 5.216358492 | 3.825383683 |
| AC018638.4  | ENSG00000243302.3  | 3.233349242 | 4.719833564 | 4.399392999 |
| ZNF587B     | ENSG00000269343.6  | 5.127254795 | 3.438820125 | 3.791859163 |
| PIMREG      | ENSG00000129195.15 | 4.361746124 | 3.808491311 | 3.421118013 |
| CDKN2C      | ENSG00000123080.10 | 6.398651657 | 3.095924419 | 4.439606644 |
| SIVA1       | ENSG00000184990.12 | 5.884326182 | 5.784280245 | 3.195901618 |
| INF2        | ENSG00000203485.12 | 5.469186104 | 4.990684936 | 3.173720088 |
| KLHL15      | ENSG00000174010.9  | 3.759220925 | 3.180650779 | 3.373912888 |
| BCKDHB      | ENSG00000083123.14 | 3.47783682  | 3.895019194 | 3.963653746 |
| TTC21B      | ENSG00000123607.14 | 3.13880389  | 4.542381214 | 4.431045565 |
| LYSMD2      | ENSG00000140280.13 | 3.791944338 | 3.959393012 | 3.719419338 |
| CHRNA5      | ENSG00000169684.13 | 3.245067131 | 3.795073445 | 4.053270658 |
| ARL13B      | ENSG00000169379.15 | 4.282519753 | 4.093412635 | 3.236528955 |
| RIDA        | ENSG00000132541.10 | 4.816819147 | 4.58485513  | 3.236761438 |
| ZNF717      | ENSG00000227124.8  | 4.41216848  | 4.200475807 | 3.781152361 |
| PMS2P1      | ENSG00000078319.9  | 4.057210384 | 4.380618728 | 3.83698296  |
| ELF2        | ENSG00000109381.19 | 5.00830721  | 3.638710733 | 4.247883269 |
| TUBGCP6     | ENSG00000128159.11 | 3.953688212 | 4.881638923 | 4.96004492  |
| BLM         | ENSG00000197299.10 | 4.456524518 | 4.214687382 | 3.181371329 |
| PLEKHA1     | ENSG00000107679.14 | 4.488794663 | 3.989105914 | 3.452233756 |
| LATS1       | ENSG00000131023.12 | 4.486382339 | 3.534895881 | 3.695316384 |
| PPCDC       | ENSG00000138621.11 | 3.162305082 | 3.696175269 | 3.374951736 |
| CASK        | ENSG00000147044.20 | 4.050138003 | 3.341602073 | 4.751824677 |
| USP37       | ENSG00000135913.10 | 3.476076756 | 3.153268281 | 3.140516285 |
| ZNF761      | ENSG00000160336.14 | 3.414813556 | 3.531651992 | 3.142428918 |
| EEF2KMT     | ENSG00000118894.14 | 4.370381512 | 4.064917177 | 3.173837111 |
| FDXR        | ENSG00000161513.11 | 4.37055147  | 5.347870097 | 5.472756468 |
| ANKRD10-IT1 | ENSG00000229152.2  | 4.390958751 | 3.068698812 | 3.551215113 |
| C22orf39    | ENSG00000242259.8  | 3.319269563 | 3.535281294 | 4.295067315 |



|            |                    |             |             |             |
|------------|--------------------|-------------|-------------|-------------|
| LSM6       | ENSG00000164167.10 | 5.05651342  | 3.55717492  | 3.62347625  |
| SNN        | ENSG00000184602.5  | 3.11557053  | 4.260631362 | 3.911949348 |
| ZNF174     | ENSG00000103343.12 | 3.979626148 | 3.700324517 | 3.551816674 |
| WDR19      | ENSG00000157796.17 | 4.519126653 | 3.814430954 | 6.133892525 |
| DUSP1      | ENSG00000120129.5  | 3.83724852  | 3.341320856 | 3.196969959 |
| CCSAP      | ENSG00000154429.10 | 4.588235081 | 3.166917203 | 3.618359214 |
| AC087481.3 | ENSG00000270015.1  | 3.311686442 | 3.617783687 | 3.650438942 |
| GOLGA2P10  | ENSG00000255769.7  | 4.162796784 | 3.184532112 | 5.4544114   |
| TMEM161B-A | ENSG00000247828.7  | 4.399527433 | 4.258258002 | 5.004290604 |
| CCDC174    | ENSG00000154781.15 | 4.232477828 | 4.116898309 | 3.74828315  |
| AC125257.1 | ENSG00000259623.1  | 4.014490844 | 3.760280374 | 4.250899607 |
| LMBR1L     | ENSG00000139636.15 | 3.965209579 | 4.732823961 | 4.880406643 |
| RUFY3      | ENSG00000018189.12 | 3.202627388 | 5.30247836  | 6.278635651 |
| UTRN       | ENSG00000152818.18 | 5.075453835 | 4.70186963  | 3.780943641 |
| SMPDL3A    | ENSG00000172594.12 | 3.132434278 | 4.832575647 | 4.228028399 |
| HIPK1      | ENSG00000163349.21 | 3.850413126 | 4.163602124 | 4.26829132  |
| MAP3K1     | ENSG00000095015.5  | 3.938867987 | 4.266816952 | 5.199084241 |
| KDELC1     | ENSG00000134901.12 | 5.441165766 | 3.321962056 | 3.117429212 |
| FBXO31     | ENSG00000103264.17 | 4.185915553 | 4.357132733 | 4.76694317  |
| CD83       | ENSG00000112149.9  | 3.185483919 | 5.796564685 | 4.142897774 |
| CEP76      | ENSG00000101624.10 | 3.740177539 | 3.933655296 | 3.05558274  |
| PAPD7      | ENSG00000112941.13 | 4.898304899 | 4.221428562 | 3.295950968 |
| CENPW      | ENSG00000203760.8  | 5.50799683  | 4.53653171  | 3.534070991 |
| ATG4A      | ENSG00000101844.17 | 3.672753682 | 4.265035951 | 4.047517384 |
| CDK19      | ENSG00000155111.14 | 3.857617261 | 3.86208909  | 3.942981303 |
| CERCAM     | ENSG00000167123.18 | 5.855800124 | 7.12035025  | 3.091083545 |
| MRM1       | ENSG00000278619.4  | 4.614697686 | 4.353325143 | 4.250071493 |
| ZC2HC1A    | ENSG00000104427.11 | 3.544146135 | 3.605219289 | 4.736060608 |
| PHKA2      | ENSG00000044446.11 | 3.447960302 | 3.429783584 | 4.553791432 |
| SLC12A7    | ENSG00000113504.20 | 4.58240327  | 6.042303264 | 8.233806409 |
| AC015922.4 | ENSG00000276855.1  | 3.812535109 | 3.779939544 | 3.756477471 |
| HIST1H1C   | ENSG00000187837.3  | 4.368892574 | 6.187075466 | 3.601441348 |
| ETNK2      | ENSG00000143845.14 | 4.084677754 | 3.376562532 | 4.70459691  |
| AC009948.1 | ENSG00000223960.6  | 3.693879887 | 4.217023333 | 5.0665842   |
| SNX21      | ENSG00000124104.18 | 5.110501074 | 3.823593826 | 4.703452342 |
| GOLGA8B    | ENSG00000215252.11 | 3.555146118 | 5.022096545 | 4.802181503 |
| WDR92      | ENSG00000243667.6  | 3.8680004   | 4.686584294 | 3.116394169 |
| TRIM38     | ENSG00000112343.10 | 3.075309885 | 3.847119966 | 4.156091904 |
| MDM1       | ENSG00000111554.14 | 3.605375068 | 3.479897081 | 3.430565991 |
| MINDY1     | ENSG00000143409.15 | 4.320405964 | 3.5653292   | 3.865553908 |
| HSPB8      | ENSG00000152137.6  | 3.383816407 | 6.18863199  | 6.706813413 |
| MTMR10     | ENSG00000166912.16 | 3.573210769 | 3.91037108  | 3.279148758 |
| FAM120B    | ENSG00000112584.13 | 4.377858948 | 4.181556512 | 3.274875958 |
| TRMT5      | ENSG00000126814.6  | 3.625194804 | 3.126772226 | 3.35233923  |
| DUXAP8     | ENSG00000206195.10 | 3.933138746 | 3.822738577 | 3.525051885 |
| EYA3       | ENSG00000158161.15 | 5.104619258 | 5.05300963  | 4.186195573 |

|           |                     |             |             |             |
|-----------|---------------------|-------------|-------------|-------------|
| CRY1      | ENSG00000008405.11  | 4.148396947 | 4.416357178 | 3.1003893   |
| GPATCH2L  | ENSG000000089916.17 | 3.552638354 | 3.662031016 | 4.199567355 |
| CROT      | ENSG000000005469.11 | 3.28709786  | 5.004579397 | 3.870613604 |
| GPATCH1   | ENSG000000076650.6  | 3.85760264  | 3.337956617 | 3.106515625 |
| CBL       | ENSG000000110395.6  | 4.571661042 | 4.451887063 | 5.074747794 |
| PIK3R3    | ENSG000000117461.14 | 4.158500287 | 3.578226171 | 3.135788157 |
| TMEM241   | ENSG000000134490.13 | 3.540025482 | 4.581816304 | 3.543560532 |
| OAF       | ENSG000000184232.8  | 8.064314373 | 5.957326201 | 3.089553403 |
| MIS12     | ENSG000000167842.15 | 5.556363557 | 3.816889847 | 3.674404956 |
| LAMA5     | ENSG000000130702.15 | 4.205243793 | 3.08098973  | 4.083174338 |
| SEC22A    | ENSG000000121542.11 | 3.624482709 | 3.950493102 | 3.584897539 |
| C8orf58   | ENSG000000241852.9  | 4.379131809 | 3.472365653 | 3.13830131  |
| USP38     | ENSG000000170185.9  | 3.944842244 | 3.234795129 | 3.63330947  |
| RABEP2    | ENSG000000177548.12 | 4.359326126 | 3.264129547 | 4.294926784 |
| CYB561    | ENSG000000008283.15 | 5.380746555 | 3.160560525 | 3.820499119 |
| SLC33A1   | ENSG000000169359.13 | 3.870250604 | 4.361276973 | 4.016001933 |
| WDR62     | ENSG000000075702.16 | 4.674468144 | 3.812914355 | 3.089289253 |
| EPC1      | ENSG000000120616.15 | 3.958528871 | 3.285490855 | 3.905669411 |
| TRIM23    | ENSG000000113595.14 | 4.174135799 | 3.160751463 | 4.062889217 |
| MCF2L     | ENSG000000126217.20 | 5.229841587 | 6.97030021  | 4.960940197 |
| TRIM21    | ENSG000000132109.9  | 3.110609633 | 4.85226772  | 3.717047094 |
| SLC19A2   | ENSG000000117479.12 | 4.513811995 | 6.433885992 | 3.84912681  |
| AKAP13    | ENSG000000170776.21 | 4.473953667 | 4.926027381 | 4.875353184 |
| PLEKHH3   | ENSG000000068137.14 | 3.912486303 | 3.743310416 | 3.485927297 |
| CENPBD1   | ENSG000000177946.5  | 4.267627755 | 3.729755756 | 3.142806206 |
| KIAA0232  | ENSG000000170871.11 | 4.121041875 | 3.244681284 | 5.647762023 |
| TNC       | ENSG000000041982.15 | 8.922120483 | 6.423400438 | 5.73833403  |
| BMP2K     | ENSG000000138756.17 | 3.054000893 | 4.216753151 | 3.723821102 |
| FYCO1     | ENSG000000163820.14 | 3.102387188 | 5.247775711 | 4.472348304 |
| RNF185    | ENSG000000138942.15 | 3.082841311 | 4.085007431 | 4.047022021 |
| OXNAD1    | ENSG000000154814.13 | 4.135291672 | 4.771531871 | 3.394804445 |
| SH3PXD2A  | ENSG000000107957.16 | 6.183806002 | 4.131864187 | 3.581541619 |
| STN1      | ENSG000000107960.10 | 5.375698538 | 3.410235151 | 4.049276167 |
| CEP72     | ENSG000000112877.7  | 3.462120014 | 4.169809179 | 3.641782053 |
| GTF3C4    | ENSG000000125484.11 | 5.339202101 | 4.922677788 | 3.088785699 |
| LINC01116 | ENSG000000163364.9  | 3.427916981 | 4.855382869 | 4.985431015 |
| HIRIP3    | ENSG000000149929.15 | 5.191662145 | 3.220846383 | 4.014497077 |
| C20orf96  | ENSG000000196476.11 | 3.136239825 | 4.148675409 | 3.442303545 |
| EHD1      | ENSG000000110047.17 | 4.390555095 | 4.847454281 | 4.36455163  |
| XRRRA1    | ENSG000000166435.15 | 3.333228966 | 3.919134848 | 3.678131066 |
| HYPK      | ENSG000000242028.6  | 6.749891976 | 4.750681992 | 3.877043559 |
| LPP       | ENSG000000145012.13 | 3.41277118  | 4.019959561 | 4.327984931 |
| ERI1      | ENSG000000104626.14 | 4.050755589 | 3.058110109 | 3.844082942 |
| DOLPP1    | ENSG000000167130.17 | 5.144802314 | 4.740180549 | 3.170987388 |
| CEP83     | ENSG000000173588.14 | 4.044232781 | 4.062854018 | 3.097181732 |
| NXT2      | ENSG000000101888.11 | 3.429916366 | 6.960491315 | 3.68102244  |

|            |                    |             |             |             |
|------------|--------------------|-------------|-------------|-------------|
| PPP1R21    | ENSG00000162869.15 | 3.482861646 | 4.333092652 | 3.818644881 |
| ZBTB10     | ENSG00000205189.11 | 3.865633683 | 3.852917053 | 4.312916774 |
| ATE1       | ENSG00000107669.17 | 5.018257186 | 4.005445191 | 4.153142352 |
| INAFM2     | ENSG00000259330.2  | 4.606354115 | 4.823920008 | 3.119893084 |
| MED30      | ENSG00000164758.7  | 4.878877473 | 3.890703849 | 3.136713657 |
| AGO4       | ENSG00000134698.10 | 3.178182296 | 3.593781425 | 3.481245964 |
| ZNF200     | ENSG00000010539.11 | 4.642515925 | 4.016388123 | 3.067851643 |
| MAFF       | ENSG00000185022.11 | 3.978644079 | 5.547446394 | 5.989129573 |
| SPRTN      | ENSG00000010072.15 | 4.367633965 | 3.245766437 | 3.353871373 |
| MED20      | ENSG00000124641.15 | 4.060403306 | 3.369909883 | 3.907210722 |
| APBB3      | ENSG00000113108.19 | 4.174752051 | 3.062604368 | 3.934769034 |
| AP4E1      | ENSG00000081014.10 | 3.919027756 | 4.004787814 | 3.670678511 |
| RRNAD1     | ENSG00000143303.11 | 4.838936075 | 4.295143711 | 3.107675603 |
| WASH2P     | ENSG00000146556.14 | 3.73289405  | 3.265347243 | 4.01273527  |
| PLA2G6     | ENSG00000184381.18 | 4.090980828 | 5.393921055 | 7.520382304 |
| NKIRAS1    | ENSG00000197885.10 | 4.303154196 | 4.137785015 | 3.616654817 |
| ERC1       | ENSG00000082805.19 | 4.312261066 | 4.515550497 | 6.284895755 |
| TSNARE1    | ENSG00000171045.14 | 3.644541724 | 3.802715292 | 3.555412417 |
| DOLK       | ENSG00000175283.7  | 4.981300306 | 5.460803307 | 3.15994303  |
| XRCC4      | ENSG00000152422.15 | 4.232817468 | 3.909549122 | 4.614053499 |
| TTC5       | ENSG00000136319.11 | 3.407613523 | 3.394270945 | 3.302604313 |
| WARS2      | ENSG00000116874.11 | 4.27468075  | 3.054387094 | 3.767428348 |
| KDM6A      | ENSG00000147050.14 | 4.267583231 | 3.651638483 | 3.77087027  |
| FRA10AC1   | ENSG00000148690.11 | 4.405957358 | 3.674628671 | 3.225777572 |
| RELT       | ENSG00000054967.12 | 4.02831011  | 3.58864138  | 3.598887703 |
| MTX1       | ENSG00000173171.14 | 4.622769868 | 4.323893612 | 3.119255708 |
| BBIP1      | ENSG00000214413.7  | 4.548166668 | 3.180247288 | 4.526923397 |
| EBAG9      | ENSG00000147654.14 | 3.330478878 | 3.507494066 | 3.73031899  |
| FAM149B1   | ENSG00000138286.14 | 3.177285533 | 3.27990365  | 3.065475142 |
| UBE2D4     | ENSG00000078967.12 | 3.726179405 | 4.022636209 | 3.821300854 |
| TSPAN13    | ENSG00000106537.7  | 8.04895056  | 5.43575941  | 3.079157914 |
| URM1       | ENSG00000167118.10 | 5.847860642 | 5.389454076 | 3.097190845 |
| ALKBH8     | ENSG00000137760.14 | 5.44900817  | 3.130500003 | 4.391853569 |
| CCDC28A    | ENSG00000024862.17 | 4.797727052 | 3.876622032 | 3.237321759 |
| TFAP4      | ENSG00000090447.11 | 4.805869601 | 4.412345083 | 3.522440975 |
| AC006064.4 | ENSG00000269968.1  | 4.920396373 | 4.065662887 | 4.284190808 |
| BRIP1      | ENSG00000136492.8  | 3.987100405 | 3.176152014 | 3.936433847 |
| DUSP16     | ENSG00000111266.8  | 3.129619098 | 4.071335501 | 6.361846353 |
| INPP5E     | ENSG00000148384.12 | 3.896224481 | 4.729612917 | 4.977805753 |
| ZNF789     | ENSG00000198556.13 | 3.475133082 | 3.628369507 | 3.169436267 |
| DUSP7      | ENSG00000164086.9  | 5.137693013 | 4.350341926 | 3.088993    |
| GFOD2      | ENSG00000141098.12 | 4.498250696 | 3.042277679 | 4.386905707 |
| BORCS7     | ENSG00000166275.15 | 4.371582471 | 3.786497012 | 3.658468913 |
| AGAP1      | ENSG00000157985.18 | 4.254433092 | 3.99025715  | 4.977831107 |
| H6PD       | ENSG00000049239.12 | 4.384707469 | 4.024124213 | 3.601619736 |
| WDR44      | ENSG00000131725.13 | 3.848474352 | 3.689039116 | 3.348454627 |

|            |                    |             |             |             |
|------------|--------------------|-------------|-------------|-------------|
| MED23      | ENSG00000112282.17 | 3.902622619 | 3.990804197 | 3.746135419 |
| RBAK       | ENSG00000146587.17 | 3.204972507 | 4.466526309 | 4.012376656 |
| RWDD2B     | ENSG00000156253.6  | 4.273379134 | 4.322082994 | 3.108388695 |
| EME1       | ENSG00000154920.14 | 4.32275376  | 3.593774041 | 3.223924502 |
| REST       | ENSG00000084093.16 | 4.840931248 | 3.655942123 | 3.895254989 |
| FBXW8      | ENSG00000174989.12 | 3.71861014  | 4.281398943 | 3.264277445 |
| PURA       | ENSG00000185129.5  | 4.350713307 | 3.065724256 | 4.01860965  |
| TADA2B     | ENSG00000173011.11 | 3.783034321 | 2.996476306 | 4.780983808 |
| KIAA0753   | ENSG00000198920.9  | 4.304906979 | 3.113860658 | 3.398871642 |
| ACOX3      | ENSG00000087008.15 | 4.04043697  | 3.468710551 | 5.063201323 |
| ZNF462     | ENSG00000148143.12 | 4.419809059 | 5.138491401 | 3.191372235 |
| ELL        | ENSG00000105656.12 | 4.270221973 | 3.748374919 | 4.01652691  |
| GIN54      | ENSG00000147536.11 | 3.752925242 | 3.824631678 | 3.30537378  |
| TRIP11     | ENSG00000100815.12 | 3.886861666 | 3.68513795  | 3.003266109 |
| TPGS1      | ENSG00000141933.9  | 4.658776878 | 4.762413869 | 3.320402593 |
| TTC39C     | ENSG00000168234.12 | 4.306892126 | 3.96458661  | 4.840896235 |
| DENND4A    | ENSG00000174485.15 | 4.29670152  | 3.806015596 | 4.392475345 |
| TFDP2      | ENSG00000114126.17 | 5.230724492 | 5.12710024  | 4.562301309 |
| AKTIP      | ENSG00000166971.16 | 4.202367667 | 3.301407759 | 4.842449885 |
| MTUS1      | ENSG00000129422.14 | 4.488607916 | 4.692893821 | 7.125930926 |
| NCBP3      | ENSG00000074356.16 | 4.411468084 | 3.098318986 | 3.752153446 |
| C1orf112   | ENSG00000000460.16 | 5.32097341  | 4.48793463  | 3.10487575  |
| NAA40      | ENSG00000110583.12 | 4.976660006 | 3.613432285 | 4.752443261 |
| MORC4      | ENSG00000133131.14 | 3.060457597 | 3.931060418 | 4.140972659 |
| SNTB1      | ENSG00000172164.13 | 5.984091884 | 3.198375569 | 7.2572985   |
| VAMP4      | ENSG00000117533.14 | 3.441507335 | 3.439554413 | 3.82111078  |
| DNAJC16    | ENSG00000116138.12 | 3.815531165 | 4.567814836 | 3.807405289 |
| KAT14      | ENSG00000149474.13 | 4.241450714 | 4.230040118 | 3.0427054   |
| ESPL1      | ENSG00000135476.11 | 5.518956524 | 3.913455825 | 3.047828785 |
| ZNF408     | ENSG00000175213.2  | 4.249167641 | 4.076919437 | 4.340229869 |
| GDF11      | ENSG00000135414.9  | 5.55688413  | 3.768532308 | 3.059931734 |
| UNC13B     | ENSG00000198722.14 | 4.100194291 | 3.945027547 | 3.546983708 |
| ENTPD7     | ENSG00000198018.6  | 4.067167568 | 4.310128252 | 2.983207323 |
| CHD7       | ENSG00000171316.11 | 4.237646386 | 4.539502401 | 4.357748449 |
| ITGB3      | ENSG00000259207.7  | 8.198649844 | 3.842168165 | 8.051532269 |
| DEPDC1     | ENSG00000024526.16 | 5.381082733 | 4.073422949 | 3.453711375 |
| LRP11      | ENSG00000120256.9  | 4.765136528 | 4.143484716 | 3.162984362 |
| PIAS1      | ENSG00000033800.13 | 4.094066611 | 4.199745502 | 4.145655031 |
| ATP23      | ENSG00000166896.7  | 3.460952385 | 3.044553488 | 4.066973719 |
| CAPN5      | ENSG00000149260.15 | 5.910091393 | 3.808066541 | 5.251279681 |
| ARRDC1-AS1 | ENSG00000203993.4  | 4.14575343  | 4.062612681 | 3.463016056 |
| ZBTB14     | ENSG00000198081.10 | 3.395808195 | 3.712467957 | 3.845227899 |
| BLOC1S3    | ENSG00000189114.6  | 3.246279208 | 3.508634952 | 4.445832157 |
| FXN        | ENSG00000165060.11 | 4.516241371 | 4.338043839 | 3.066075482 |
| SOWAHC     | ENSG00000198142.4  | 3.247026504 | 3.362640312 | 3.984990249 |
| RAD52      | ENSG00000002016.17 | 3.357280821 | 3.566525511 | 4.680977629 |

|             |                    |             |             |             |
|-------------|--------------------|-------------|-------------|-------------|
| TTC23       | ENSG00000103852.12 | 3.999828756 | 4.011295189 | 3.978581467 |
| SLC48A1     | ENSG00000211584.13 | 5.050656405 | 3.059862048 | 4.694040585 |
| MAGEH1      | ENSG00000187601.4  | 3.0572776   | 5.180522522 | 4.285779399 |
| GADD45B     | ENSG00000099860.8  | 3.325900269 | 4.730731007 | 3.747426376 |
| SETDB2      | ENSG00000136169.16 | 3.342682749 | 4.166900064 | 4.772776122 |
| RBM41       | ENSG00000089682.16 | 3.819148756 | 4.116396012 | 3.983036221 |
| CREBRF      | ENSG00000164463.12 | 3.375762894 | 3.521815294 | 4.10357592  |
| SCFD2       | ENSG00000184178.15 | 5.114576984 | 4.525315799 | 4.687583861 |
| CDAN1       | ENSG00000140326.12 | 3.650728278 | 3.404728271 | 3.15754833  |
| PAAF1       | ENSG00000175575.12 | 4.023383492 | 3.544951479 | 3.733568118 |
| RMI1        | ENSG00000178966.16 | 4.941194582 | 4.576174974 | 3.199787059 |
| SCLT1       | ENSG00000151466.11 | 3.965642057 | 3.062668288 | 4.045569208 |
| FANCG       | ENSG00000221829.9  | 5.40824144  | 3.949259835 | 3.199305236 |
| RIN1        | ENSG00000174791.10 | 4.817486397 | 3.583252456 | 3.77620048  |
| AC008770.1  | ENSG00000219665.8  | 5.044968545 | 3.233793867 | 3.515441674 |
| FBXO25      | ENSG00000147364.16 | 3.489392592 | 4.041795763 | 4.788560401 |
| OGG1        | ENSG00000114026.21 | 4.329028775 | 3.767517425 | 3.551703879 |
| PLXND1      | ENSG00000004399.12 | 4.870013008 | 4.829547996 | 5.484815795 |
| ING1        | ENSG00000153487.12 | 4.86664158  | 3.13740743  | 3.414843991 |
| STAG3L5P-PV | ENSG00000272752.6  | 3.023793513 | 3.829139562 | 3.754330027 |
| KLHL8       | ENSG00000145332.13 | 4.299155863 | 3.175531797 | 3.873269618 |
| INPP5A      | ENSG00000068383.18 | 4.348056809 | 3.729956599 | 4.248477008 |
| CASP9       | ENSG00000132906.17 | 4.246278014 | 3.809601662 | 4.26931712  |
| HSDL1       | ENSG00000103160.11 | 4.489383228 | 4.516012789 | 5.98125584  |
| ZNF202      | ENSG00000166261.10 | 4.323958588 | 3.177254474 | 3.938161909 |
| ALG12       | ENSG00000182858.13 | 2.986718131 | 3.847404974 | 3.883330174 |
| LINC00294   | ENSG00000280798.1  | 4.078281061 | 3.250314623 | 4.779398232 |
| ASPM        | ENSG00000066279.17 | 6.014077617 | 3.650443569 | 3.03600976  |
| RXRA        | ENSG00000186350.9  | 3.816267659 | 4.231786823 | 2.993845516 |
| C11orf57    | ENSG00000150776.17 | 4.396071131 | 3.120018442 | 4.817026386 |
| TMEM164     | ENSG00000157600.11 | 3.829617564 | 4.626417389 | 4.895848399 |
| FKBP7       | ENSG00000079150.17 | 3.16429303  | 4.994388054 | 3.41514065  |
| GPAM        | ENSG00000119927.13 | 3.715342096 | 3.244229529 | 3.343082454 |
| GON7        | ENSG00000170270.4  | 5.315577018 | 4.410035374 | 3.076443094 |
| HERC2P9     | ENSG00000206149.10 | 3.230136607 | 3.801469435 | 3.69957704  |
| PARP16      | ENSG00000138617.14 | 3.635694389 | 3.341515361 | 4.373995675 |
| ENTPD1-AS1  | ENSG00000226688.6  | 4.636623021 | 3.030658299 | 3.080731213 |
| C17orf51    | ENSG00000212719.10 | 3.083641495 | 3.084588169 | 3.827940357 |
| FPGT        | ENSG00000254685.6  | 4.420157609 | 3.481544208 | 4.106860711 |
| PIDD1       | ENSG00000177595.17 | 3.712789175 | 3.939778448 | 3.950023007 |
| XPA         | ENSG00000136936.10 | 3.758001419 | 3.724383513 | 3.36619733  |
| EVC         | ENSG00000072840.12 | 3.64488443  | 3.086382174 | 7.681254569 |
| SPP1        | ENSG00000118785.13 | 4.258072654 | 6.74960179  | 6.088026031 |
| TMEM168     | ENSG00000146802.12 | 3.043410466 | 4.190894879 | 3.661425827 |
| GPT2        | ENSG00000166123.13 | 5.518884264 | 3.406830521 | 4.558037336 |
| PDZD8       | ENSG00000165650.11 | 5.021142748 | 3.548375539 | 4.442731178 |

|            |                    |             |             |             |
|------------|--------------------|-------------|-------------|-------------|
| NEU3       | ENSG00000162139.9  | 3.512538321 | 3.990764222 | 4.233785133 |
| WDR24      | ENSG00000127580.15 | 4.250291913 | 3.755332526 | 3.785508301 |
| NBPF9      | ENSG00000269713.7  | 3.837134081 | 3.38513351  | 3.163711075 |
| ZBTB24     | ENSG00000112365.4  | 3.29299113  | 3.756938463 | 3.291463302 |
| HIF1AN     | ENSG00000166135.13 | 4.413160881 | 3.562203913 | 4.791507701 |
| WRN        | ENSG00000165392.9  | 3.195286804 | 3.728204579 | 3.461806955 |
| PET117     | ENSG00000232838.3  | 3.684665224 | 4.28008413  | 3.13429432  |
| TMEM18     | ENSG00000151353.14 | 3.999044126 | 3.762472254 | 3.076329748 |
| RNF170     | ENSG00000120925.15 | 3.027041851 | 3.912902023 | 4.737701297 |
| DHRS4-AS1  | ENSG00000215256.3  | 3.412506885 | 3.529976169 | 3.489571844 |
| MAP2K6     | ENSG00000108984.13 | 4.344889099 | 3.070839324 | 5.65557419  |
| C21orf91   | ENSG00000154642.10 | 3.09283713  | 4.853392805 | 6.867310932 |
| FBXL12     | ENSG00000127452.8  | 4.45807148  | 4.715381262 | 3.536334787 |
| JMJD4      | ENSG00000081692.12 | 4.165849464 | 3.777741368 | 3.190332475 |
| NAT14      | ENSG00000090971.4  | 5.054499364 | 3.391732145 | 4.696059032 |
| CXorf40A   | ENSG00000197620.10 | 3.466829292 | 3.615924252 | 3.826361321 |
| TIRAP      | ENSG00000150455.13 | 4.031421078 | 3.21547541  | 4.723169315 |
| TRIM68     | ENSG00000167333.12 | 2.988159233 | 3.877726574 | 4.038989045 |
| DDAH2      | ENSG00000213722.8  | 3.093746921 | 4.076160773 | 5.109575959 |
| ANKRD26    | ENSG00000107890.16 | 3.113324853 | 2.999864504 | 3.472353692 |
| COX18      | ENSG00000163626.16 | 3.439430794 | 3.685831926 | 3.675558566 |
| ATP7A      | ENSG00000165240.18 | 3.007377513 | 4.313348952 | 3.616504738 |
| AC005261.2 | ENSG00000268205.1  | 4.292575557 | 2.98618592  | 4.342854698 |
| BICRA      | ENSG00000063169.10 | 3.693666503 | 3.365242027 | 3.266032716 |
| DBNDD1     | ENSG00000003249.13 | 5.465367005 | 6.765409948 | 5.079487786 |
| NP1PB5     | ENSG00000243716.10 | 3.421737483 | 4.161553388 | 4.85867317  |
| HEY1       | ENSG00000164683.16 | 4.343826041 | 6.015173008 | 7.283829154 |
| SLC35A5    | ENSG00000138459.8  | 3.702844086 | 3.448678504 | 4.375322252 |
| SPECC1L    | ENSG00000100014.19 | 4.636594598 | 4.412403891 | 4.991020854 |
| MTHFSD     | ENSG00000103248.18 | 4.325436245 | 3.715085676 | 4.315017208 |
| AGL        | ENSG00000162688.16 | 4.15177927  | 3.960441433 | 3.97553625  |
| BAIAP2L2   | ENSG00000128298.16 | 4.720335807 | 5.72309585  | 4.886888112 |
| SNHG11     | ENSG00000174365.19 | 4.315552235 | 3.559099614 | 3.81697736  |
| DCAF10     | ENSG00000122741.15 | 4.262733632 | 3.91858554  | 3.874155069 |
| ATAD5      | ENSG00000176208.8  | 3.889949371 | 3.258804284 | 2.932667581 |
| NUDT12     | ENSG00000112874.9  | 4.235713885 | 3.903326215 | 4.697626468 |
| HOXB3      | ENSG00000120093.11 | 4.311392253 | 3.036010719 | 4.372726102 |
| CEP290     | ENSG00000198707.14 | 3.75164158  | 3.138042307 | 3.381463685 |
| CRYL1      | ENSG00000165475.13 | 4.475975421 | 4.138147372 | 5.825645947 |
| SMYD4      | ENSG00000186532.11 | 3.71584802  | 3.043095027 | 3.190587291 |
| DIEXF      | ENSG00000117597.17 | 4.601641021 | 2.979798759 | 2.963901472 |
| ZSCAN2     | ENSG00000176371.13 | 3.019418003 | 3.285094479 | 3.369934002 |
| PPP2R2D    | ENSG00000175470.18 | 4.369434848 | 3.70899435  | 4.047335803 |
| SIDT2      | ENSG00000149577.15 | 4.508668043 | 3.060301438 | 3.701793877 |
| ZSWIM7     | ENSG00000214941.7  | 4.115206972 | 3.839796746 | 3.117906766 |
| LRRC37BP1  | ENSG00000250462.8  | 3.555262988 | 4.050341364 | 4.393453105 |

|            |                    |             |             |             |
|------------|--------------------|-------------|-------------|-------------|
| TBC1D25    | ENSG00000068354.15 | 3.767017987 | 3.441324235 | 3.785048422 |
| PRKAR1B    | ENSG00000188191.14 | 5.305231518 | 4.985077125 | 2.97563291  |
| TPM2       | ENSG00000198467.13 | 7.653592801 | 3.02528718  | 3.205371028 |
| GMIP       | ENSG00000089639.10 | 4.182243349 | 5.088823924 | 3.962502062 |
| PKNOX1     | ENSG00000160199.14 | 3.574724105 | 3.151388448 | 3.917443279 |
| AC018738.1 | ENSG00000237039.1  | 5.282120843 | 3.08084359  | 3.261996159 |
| SVIL-AS1   | ENSG00000224597.9  | 3.500138496 | 4.662616123 | 5.314896349 |
| ORAOV1     | ENSG00000149716.12 | 4.302210703 | 3.683563693 | 3.974177735 |
| TIGD2      | ENSG00000180346.3  | 3.326793806 | 3.022418054 | 3.727671569 |
| BBS1       | ENSG00000174483.19 | 4.262297243 | 3.682948827 | 3.867118622 |
| TMLHE      | ENSG00000185973.10 | 3.680068414 | 3.659511885 | 3.53551725  |
| FECH       | ENSG00000066926.10 | 4.455633101 | 4.635233217 | 3.075193901 |
| MAP4K5     | ENSG00000012983.11 | 4.61577269  | 4.484737537 | 4.165392365 |
| LRSAM1     | ENSG00000148356.13 | 4.050483808 | 4.677641784 | 3.727484864 |
| C3orf58    | ENSG00000181744.8  | 3.764869464 | 3.648675938 | 3.511442955 |
| SMG8       | ENSG00000167447.12 | 4.007646391 | 4.700463016 | 5.152074654 |
| USP42      | ENSG00000106346.11 | 3.872741488 | 3.856622969 | 3.22066366  |
| TMEM260    | ENSG00000070269.13 | 3.096374923 | 4.52739802  | 4.348070312 |
| QRSL1      | ENSG00000130348.11 | 3.950284453 | 3.4427564   | 3.369208007 |
| CNN2       | ENSG00000064666.14 | 4.916983049 | 5.463978203 | 4.410914214 |
| SGTB       | ENSG00000197860.9  | 2.94980627  | 4.034327299 | 5.049145621 |
| LRRC40     | ENSG00000066557.5  | 4.880593091 | 4.00218157  | 3.050426921 |
| GTPBP10    | ENSG00000105793.15 | 3.46839327  | 3.400314638 | 3.095423944 |
| MYO9A      | ENSG00000066933.15 | 3.819463123 | 3.887827002 | 4.125424605 |
| MAFK       | ENSG00000198517.9  | 4.183911066 | 6.991390897 | 5.235098581 |
| TJP2       | ENSG00000119139.17 | 5.424485541 | 3.988582318 | 2.958450931 |
| MTF2       | ENSG00000143033.17 | 3.968238178 | 3.828777484 | 3.131866796 |
| CIDECP     | ENSG00000186162.10 | 3.535232856 | 3.908846716 | 4.007907229 |
| TUSC1      | ENSG00000198680.4  | 4.020831831 | 3.187363483 | 2.962882823 |
| OXSM       | ENSG00000151093.7  | 3.700982085 | 3.94482486  | 3.279790499 |
| SMAD7      | ENSG00000101665.8  | 3.498382755 | 3.382730033 | 4.069694741 |
| ZNF385A    | ENSG00000161642.17 | 6.540737741 | 4.953652271 | 4.090788263 |
| RAB23      | ENSG00000112210.11 | 2.945175955 | 3.399276265 | 3.476555267 |
| COX10      | ENSG00000006695.10 | 4.868144436 | 3.434146391 | 4.398347748 |
| NT5DC1     | ENSG00000178425.13 | 4.272668173 | 4.190634237 | 3.237689813 |
| ATAT1      | ENSG00000137343.17 | 3.880854958 | 2.936449884 | 4.033622525 |
| TXNRD3     | ENSG00000197763.14 | 2.904936591 | 4.053103898 | 3.264371327 |
| MED28      | ENSG00000118579.12 | 3.683642669 | 3.048639441 | 5.330409313 |
| KCTD6      | ENSG00000168301.12 | 3.73674935  | 3.379491025 | 3.826600419 |
| AAED1      | ENSG00000158122.11 | 3.751727334 | 4.499589769 | 2.921016595 |
| WDFY3      | ENSG00000163625.15 | 3.676650785 | 4.246688863 | 4.457769554 |
| RAD54L2    | ENSG00000164080.13 | 4.616233108 | 4.361462373 | 3.755260347 |
| TEAD3      | ENSG00000007866.19 | 3.038633526 | 3.679710753 | 3.97537325  |
| GDF15      | ENSG00000130513.6  | 3.1085559   | 10.41658579 | 12.99750509 |
| CDC7       | ENSG00000097046.12 | 4.23412897  | 3.816277086 | 3.00388269  |
| ZC3H14     | ENSG00000100722.18 | 4.378562117 | 3.868698513 | 3.062321696 |

|             |                    |             |             |             |
|-------------|--------------------|-------------|-------------|-------------|
| DOCK5       | ENSG00000147459.17 | 5.389608555 | 3.839923591 | 3.291626743 |
| RPP25L      | ENSG00000164967.9  | 4.686550616 | 3.756831416 | 3.020599294 |
| PRR14L      | ENSG00000183530.13 | 4.040839603 | 4.739191466 | 4.406359995 |
| ZMAT5       | ENSG00000100319.12 | 4.035520777 | 4.765707227 | 4.691693596 |
| UBASH3B     | ENSG00000154127.9  | 5.68230364  | 3.022401721 | 4.041041366 |
| GMDS        | ENSG00000112699.10 | 5.186562262 | 4.642864248 | 4.537843436 |
| TBC1D4      | ENSG00000136111.12 | 5.4956152   | 4.180535924 | 6.083198435 |
| ATG7        | ENSG00000197548.12 | 4.254850832 | 3.916862197 | 3.491165666 |
| C10orf88    | ENSG00000119965.12 | 3.369562087 | 3.584919346 | 4.015646528 |
| C12orf76    | ENSG00000174456.13 | 4.02891265  | 3.79699443  | 3.316907112 |
| MALT1       | ENSG00000172175.12 | 4.287049086 | 3.83658907  | 5.314224842 |
| CTC1        | ENSG00000178971.13 | 3.653189405 | 2.963017747 | 3.445583247 |
| PTPRZ1      | ENSG00000106278.11 | 2.955572557 | 4.301911271 | 3.539135128 |
| PLD2        | ENSG00000129219.13 | 4.157108479 | 3.377372921 | 3.980002673 |
| FAM102A     | ENSG00000167106.11 | 4.342443489 | 5.853786807 | 4.492328001 |
| ZNF668      | ENSG00000167394.12 | 4.802016109 | 3.767099121 | 3.107071331 |
| TMTC4       | ENSG00000125247.15 | 4.370451089 | 3.322925728 | 3.12166677  |
| RTKL1-TNFRS | ENSG00000026036.21 | 3.198984751 | 3.639288486 | 4.477591468 |
| DENND1A     | ENSG00000119522.16 | 4.519921203 | 5.11658064  | 3.824026745 |
| RTTN        | ENSG00000176225.13 | 3.034256381 | 4.555894551 | 3.042506734 |
| TBCEL       | ENSG00000154114.12 | 3.640772521 | 3.32297057  | 4.606572845 |
| ARNTL       | ENSG00000133794.17 | 3.857550479 | 4.240917646 | 4.668824611 |
| ZKSCAN8     | ENSG00000198315.10 | 4.341256378 | 3.918936985 | 5.08054579  |
| DCLRE1A     | ENSG00000198924.7  | 4.506409261 | 2.991969849 | 4.126250017 |
| C11orf49    | ENSG00000149179.13 | 4.753932462 | 4.701377456 | 5.536865004 |
| RAB15       | ENSG00000139998.14 | 3.493352481 | 4.046161671 | 4.384507708 |
| ZCCHC4      | ENSG00000168228.14 | 4.467329421 | 3.021804523 | 5.536457424 |
| SLC35A1     | ENSG00000164414.17 | 4.569906667 | 3.936699852 | 3.988620827 |
| MAST3       | ENSG00000099308.10 | 3.731283148 | 4.468769662 | 3.814416134 |
| SPIDR       | ENSG00000164808.16 | 5.009287731 | 4.25512121  | 5.116743929 |
| FOCAD       | ENSG00000188352.12 | 5.017005749 | 4.377797669 | 4.444077493 |
| CDC14B      | ENSG00000081377.16 | 3.515438191 | 4.215926598 | 4.250018192 |
| ZNF331      | ENSG00000130844.16 | 3.394116189 | 3.534443051 | 3.000102814 |
| FAM86DP     | ENSG00000244026.6  | 5.500858055 | 4.918620954 | 3.156914472 |
| METTL14     | ENSG00000145388.14 | 3.476694348 | 2.996427396 | 3.684030726 |
| SAC3D1      | ENSG00000168061.14 | 4.234613425 | 3.467174455 | 2.919523354 |
| TMEM267     | ENSG00000151881.14 | 3.607024278 | 3.757120755 | 4.287145039 |
| MEX3D       | ENSG00000181588.16 | 3.471166336 | 4.260506231 | 3.305451166 |
| MRNIP       | ENSG00000161010.14 | 3.8532779   | 3.125319521 | 3.324453756 |
| ACTR5       | ENSG00000101442.9  | 3.657705759 | 3.09698488  | 3.243539146 |
| UNC93B1     | ENSG00000110057.7  | 4.685483341 | 4.448031638 | 4.204327569 |
| PEX26       | ENSG00000215193.12 | 3.057923102 | 3.495799801 | 4.178902673 |
| CTH         | ENSG00000116761.11 | 4.497470766 | 4.590834703 | 4.902854    |
| ACSF3       | ENSG00000176715.15 | 4.930334331 | 4.302462555 | 4.681815438 |
| SHTN1       | ENSG00000187164.19 | 4.488299406 | 5.193008018 | 5.157595972 |
| TMEM44      | ENSG00000145014.17 | 2.930913451 | 3.33871253  | 3.075859714 |



|            |                    |             |             |             |
|------------|--------------------|-------------|-------------|-------------|
| TDRD3      | ENSG00000083544.13 | 4.541242922 | 3.973842618 | 7.48811951  |
| TMEM51     | ENSG00000171729.13 | 3.247183449 | 4.280603785 | 3.866543505 |
| CNOT6L     | ENSG00000138767.12 | 3.39920156  | 4.148591091 | 4.206214258 |
| RHBDF2     | ENSG00000129667.12 | 3.193520371 | 6.564897395 | 5.763041032 |
| NME7       | ENSG00000143156.13 | 5.311990136 | 4.496107593 | 2.899460779 |
| DEPDC5     | ENSG00000100150.16 | 3.045512929 | 3.78267497  | 4.090310328 |
| MOCS3      | ENSG00000124217.4  | 4.545725861 | 3.696536759 | 3.331401599 |
| PCNX1      | ENSG00000100731.15 | 4.445438293 | 3.957662457 | 4.457333083 |
| ANKRD13B   | ENSG00000198720.12 | 5.071498218 | 4.384014059 | 4.413911338 |
| NRGN       | ENSG00000154146.12 | 6.162339551 | 3.034457905 | 3.808435667 |
| CROCCP2    | ENSG00000215908.10 | 4.715680347 | 4.01389826  | 4.039432955 |
| PRKAG2     | ENSG00000106617.13 | 3.377693391 | 5.210949004 | 4.738199082 |
| LRRCC1     | ENSG00000133739.15 | 3.120732617 | 3.397697648 | 2.935563325 |
| ATOH8      | ENSG00000168874.12 | 2.867038904 | 5.337421282 | 4.668465314 |
| PAPOLG     | ENSG00000115421.12 | 3.751157306 | 3.857883019 | 2.912551064 |
| TACC2      | ENSG00000138162.18 | 5.111130947 | 3.707117192 | 3.382970992 |
| LNX2       | ENSG00000139517.7  | 2.923000751 | 3.951885663 | 4.741671098 |
| GLRX       | ENSG00000173221.13 | 5.15070597  | 3.588796377 | 4.75713437  |
| LRRC28     | ENSG00000168904.14 | 3.713040931 | 3.565669851 | 4.595321325 |
| ST3GAL1    | ENSG00000008513.14 | 4.804387016 | 5.099723457 | 3.125176087 |
| ITGA7      | ENSG00000135424.15 | 2.954244036 | 9.111209877 | 4.333054388 |
| GTF2IP4    | ENSG00000233369.7  | 3.752042847 | 4.178099567 | 2.887667039 |
| ZBTB6      | ENSG00000186130.4  | 4.59490283  | 4.502751465 | 3.242912289 |
| CCNE2      | ENSG00000175305.17 | 5.150978187 | 3.107881936 | 3.119866503 |
| GPCPD1     | ENSG00000125772.12 | 3.755370557 | 2.927923428 | 3.660664581 |
| NDST2      | ENSG00000166507.17 | 3.687865574 | 2.976788734 | 3.643479989 |
| CTAGE5     | ENSG00000150527.17 | 4.248811192 | 3.077712688 | 4.876491221 |
| DNAJC25-GN | ENSG00000244115.1  | 3.21108132  | 4.215524938 | 4.048647555 |
| PIF1       | ENSG00000140451.12 | 4.738343386 | 2.956987164 | 2.998364687 |
| FUNDC2     | ENSG00000165775.17 | 3.642200016 | 2.857661965 | 2.969423563 |
| FBXO46     | ENSG00000177051.5  | 4.79694284  | 3.436814218 | 4.00671519  |
| PHLPP1     | ENSG00000081913.13 | 3.646324299 | 4.428338098 | 3.892007278 |
| TRADD      | ENSG00000102871.15 | 2.847352827 | 4.152054078 | 4.684765325 |
| GNAI3      | ENSG00000065135.10 | 3.850707477 | 3.358971603 | 2.929004012 |
| IRF9       | ENSG00000213928.8  | 3.210314081 | 3.073258129 | 5.246962011 |
| UBE2W      | ENSG00000104343.19 | 3.771845029 | 4.170691842 | 4.812981249 |
| SUSD6      | ENSG00000100647.7  | 2.957710883 | 3.450883727 | 4.53720826  |
| LDHAP4     | ENSG00000214110.3  | 3.935535244 | 3.67190582  | 3.063378389 |
| MHENCR     | ENSG00000232442.1  | 3.93054985  | 2.941240857 | 3.168506808 |
| MSX1       | ENSG00000163132.6  | 3.629364799 | 4.390405267 | 5.105996734 |
| CCDC92     | ENSG00000119242.8  | 3.053404407 | 3.190415337 | 4.550297624 |
| MT-TG      | ENSG00000210164.1  | 3.538086369 | 4.04584396  | 3.098618765 |
| SLC25A20   | ENSG00000178537.9  | 4.177451052 | 4.643027564 | 3.015726391 |
| LRFN4      | ENSG00000173621.8  | 5.736297712 | 5.171213893 | 4.662415216 |
| NFAT5      | ENSG00000102908.20 | 4.202173173 | 4.130632255 | 4.803648639 |
| ZNF234     | ENSG00000263002.7  | 3.799756991 | 3.073595234 | 3.74853732  |

|            |                    |             |             |             |
|------------|--------------------|-------------|-------------|-------------|
| RNF169     | ENSG00000166439.5  | 3.909462803 | 2.847651518 | 3.982947861 |
| BRF1       | ENSG00000185024.16 | 4.381640217 | 4.53505029  | 2.894852318 |
| AC093752.1 | ENSG00000245958.6  | 4.202365427 | 3.764911037 | 3.835385201 |
| NLRX1      | ENSG00000160703.15 | 4.226470254 | 2.949489184 | 3.139289333 |
| RMDN2      | ENSG00000115841.19 | 3.322435132 | 3.321526209 | 3.115076414 |
| ING2       | ENSG00000168556.6  | 4.747213666 | 3.079246663 | 3.071633876 |
| ZNF343     | ENSG00000088876.11 | 4.29606037  | 3.928911942 | 2.868286087 |
| ZNF414     | ENSG00000133250.13 | 4.331110056 | 3.728752897 | 3.033456739 |
| FAM219B    | ENSG00000178761.14 | 3.938490611 | 4.216630857 | 4.432423314 |
| HEXIM2     | ENSG00000168517.10 | 3.739740733 | 3.169296608 | 3.498585229 |
| ACO1       | ENSG00000122729.18 | 3.884637079 | 5.374338973 | 3.979342608 |
| RAD54L     | ENSG00000085999.11 | 4.902372817 | 3.813578377 | 2.912467046 |
| DENND4C    | ENSG00000137145.20 | 4.961940491 | 3.926873691 | 4.744495043 |
| WDYHV1     | ENSG00000156795.6  | 3.487060642 | 3.717454841 | 4.659620239 |
| CCP110     | ENSG00000103540.16 | 4.9401056   | 3.74761572  | 3.220082414 |
| GEMIN2     | ENSG00000092208.16 | 4.501128512 | 3.011581533 | 3.098234143 |
| TATDN3     | ENSG00000203705.10 | 4.607716178 | 2.912160793 | 3.634154136 |
| ALDH1A3    | ENSG00000184254.16 | 9.414492135 | 2.970758279 | 11.89983811 |
| STK38L     | ENSG00000211455.7  | 4.097203944 | 4.703056046 | 2.872278818 |
| CRADD      | ENSG00000169372.12 | 4.133644437 | 3.570633509 | 3.323434584 |
| F2R        | ENSG00000181104.6  | 5.669480671 | 4.037466724 | 2.862952864 |
| DCUN1D2    | ENSG00000150401.14 | 4.044241424 | 3.211017445 | 3.433627712 |
| RRP8       | ENSG00000132275.10 | 3.388978815 | 3.406536744 | 3.757650596 |
| HOTAIRM1   | ENSG00000233429.9  | 2.903695616 | 4.511791518 | 4.333440326 |
| SLC16A4    | ENSG00000168679.17 | 4.217717664 | 4.232688846 | 4.387093271 |
| APOOL      | ENSG00000155008.13 | 3.821511561 | 4.254837687 | 4.002370595 |
| ZMYM1      | ENSG00000197056.9  | 4.383600823 | 4.186933292 | 2.888023818 |
| C1orf50    | ENSG00000164008.14 | 3.518563821 | 3.438459511 | 3.141649535 |
| AC020916.1 | ENSG00000267519.5  | 4.35773409  | 4.622512171 | 3.335176401 |
| CCSER2     | ENSG00000107771.15 | 4.171172038 | 3.26869144  | 4.263968131 |
| BCORL1     | ENSG00000085185.15 | 3.733302754 | 4.226839232 | 4.274276126 |
| ROGDI      | ENSG00000067836.12 | 4.041134657 | 3.14147618  | 4.181334382 |
| CABLES2    | ENSG00000149679.11 | 2.974372959 | 2.882038974 | 3.856223812 |
| LHFPL6     | ENSG00000183722.7  | 2.83953211  | 4.073618663 | 4.947226762 |
| MBOAT1     | ENSG00000172197.10 | 3.234590519 | 4.655088137 | 4.971997312 |
| SCO2       | ENSG00000130489.14 | 4.473652213 | 4.862249522 | 3.751928285 |
| ATG10      | ENSG00000152348.15 | 3.496434371 | 2.883588415 | 3.355648665 |
| SPSB3      | ENSG00000162032.15 | 4.657955042 | 3.743456273 | 4.166703647 |
| CHIC2      | ENSG00000109220.10 | 4.935935133 | 3.145789534 | 4.051633893 |
| RIC8B      | ENSG00000111785.19 | 4.255531696 | 3.237497915 | 2.864180402 |
| RHPN2      | ENSG00000131941.7  | 4.544286972 | 4.032418118 | 3.298549877 |
| SERINC2    | ENSG00000168528.11 | 3.842991419 | 4.885841383 | 7.358541335 |
| MIER3      | ENSG00000155545.19 | 4.468211415 | 3.612515769 | 2.858637285 |
| STRBP      | ENSG00000165209.18 | 4.571404474 | 5.859683288 | 3.492724032 |
| MANEA      | ENSG00000172469.15 | 3.89340541  | 2.816177195 | 2.959213393 |
| SVBP       | ENSG00000177868.11 | 4.152301217 | 3.334962773 | 3.50939588  |

|             |                    |             |             |             |
|-------------|--------------------|-------------|-------------|-------------|
| KLHL22      | ENSG00000099910.16 | 2.895033365 | 3.801361142 | 3.581416489 |
| ZSCAN32     | ENSG00000140987.19 | 4.049567382 | 3.326095518 | 3.368744636 |
| ZNF43       | ENSG00000198521.11 | 5.118122377 | 4.373328358 | 2.922575502 |
| TMEM39B     | ENSG00000121775.17 | 4.572528872 | 3.869928176 | 2.995524604 |
| RALGAPA2    | ENSG00000188559.13 | 2.80777145  | 3.498481539 | 3.509404608 |
| PCCA        | ENSG00000175198.15 | 4.216597287 | 3.017218375 | 4.882123028 |
| SIMC1       | ENSG00000170085.17 | 3.769506804 | 3.912030471 | 3.567819509 |
| RPL13P5     | ENSG00000240370.6  | 3.81640043  | 3.514701326 | 4.303983104 |
| NFYB        | ENSG00000120837.7  | 4.719603734 | 3.747889216 | 3.008543792 |
| RPP38       | ENSG00000152464.14 | 4.064944064 | 4.241616415 | 3.717150944 |
| SLC10A3     | ENSG00000126903.15 | 4.806795101 | 4.044251062 | 3.641537487 |
| ORMDL3      | ENSG00000172057.9  | 3.664932127 | 4.594532034 | 3.518104602 |
| SPATA13     | ENSG00000182957.15 | 5.538513851 | 4.852964919 | 3.011633816 |
| AC007383.2  | ENSG00000227946.1  | 3.07791475  | 3.640231489 | 4.363997966 |
| THTPA       | ENSG00000259431.5  | 4.124228367 | 4.204681086 | 3.10456167  |
| CCZ1B       | ENSG00000146574.15 | 4.705721403 | 3.50244969  | 3.012622437 |
| EXT1        | ENSG00000182197.10 | 4.221876933 | 4.350650796 | 2.834357295 |
| P3H3        | ENSG00000110811.19 | 5.38736504  | 4.561045326 | 2.800378819 |
| WRAP53      | ENSG00000141499.16 | 4.702485987 | 3.153771331 | 3.62136793  |
| NMB         | ENSG00000197696.9  | 5.331144881 | 3.010418303 | 3.675417124 |
| MEIS2       | ENSG00000134138.19 | 4.757200319 | 3.821140457 | 4.81186469  |
| PRKCI       | ENSG00000163558.12 | 3.924484832 | 3.922974872 | 3.842304018 |
| BCL2L2      | ENSG00000129473.9  | 4.906507751 | 4.209415117 | 4.689201591 |
| EPDR1       | ENSG00000086289.11 | 2.884714378 | 7.176959472 | 6.172570823 |
| SLC8B1      | ENSG00000089060.11 | 3.299398263 | 3.339834564 | 3.032336688 |
| KRT8P12     | ENSG00000229320.3  | 4.240032328 | 3.97691452  | 4.880800151 |
| SPIRE2      | ENSG00000204991.10 | 3.442951628 | 3.957340387 | 3.738539384 |
| RAD51       | ENSG00000051180.16 | 5.263357417 | 3.870480242 | 2.954346064 |
| NFKBIE      | ENSG00000146232.15 | 3.119290854 | 3.072818514 | 4.688105661 |
| CXCL8       | ENSG00000169429.10 | 3.463468475 | 3.82795934  | 3.844129359 |
| AC073869.1  | ENSG00000152117.17 | 2.79397268  | 3.567714531 | 2.994203522 |
| PRR3        | ENSG00000204576.11 | 5.064271212 | 4.089593295 | 2.941656472 |
| ROBO3       | ENSG00000154134.14 | 3.848947568 | 3.85612878  | 3.118336621 |
| GALT        | ENSG00000213930.11 | 4.284966499 | 3.184564487 | 2.936373202 |
| BRF2        | ENSG00000104221.12 | 3.005232049 | 3.231438826 | 3.85812732  |
| DRAM1       | ENSG00000136048.13 | 3.771142138 | 3.919018853 | 3.694517958 |
| BCR         | ENSG00000186716.20 | 4.046013903 | 4.568740516 | 4.451944445 |
| BMPR1A      | ENSG00000107779.13 | 4.362613773 | 3.268082514 | 4.497033388 |
| RNASEK-C17c | ENSG00000161939.19 | 4.752085374 | 3.038071535 | 4.026337791 |
| USP6NL      | ENSG00000148429.14 | 3.406872864 | 3.827770899 | 5.815685116 |
| C7orf25     | ENSG00000136197.12 | 4.564015783 | 4.630052424 | 3.945027414 |
| RELL1       | ENSG00000181826.9  | 5.904377766 | 2.993889923 | 7.584568362 |
| TAPT1       | ENSG00000169762.16 | 4.559662548 | 2.887234398 | 5.712365451 |
| SIRT1       | ENSG00000096717.11 | 4.596970522 | 2.897270025 | 4.007967236 |
| EXOG        | ENSG00000157036.12 | 4.207903273 | 4.253566777 | 2.971903836 |
| LYSMD1      | ENSG00000163155.11 | 3.98869711  | 3.597434658 | 2.89440575  |

|            |                    |             |             |             |
|------------|--------------------|-------------|-------------|-------------|
| RASSF8-AS1 | ENSG00000246695.7  | 4.289927387 | 4.010903775 | 3.806321942 |
| NABP1      | ENSG00000173559.12 | 3.304527223 | 5.428023974 | 4.274185186 |
| CYB5D2     | ENSG00000167740.9  | 4.296480793 | 2.964132641 | 3.445004677 |
| YBEY       | ENSG00000182362.13 | 4.081865323 | 3.507952509 | 3.239720636 |
| TUT1       | ENSG00000149016.15 | 4.923293224 | 3.54754724  | 4.079156267 |
| AL359075.1 | ENSG00000242193.10 | 2.85756941  | 3.31099411  | 3.714919757 |
| ZNF691     | ENSG00000164011.17 | 4.120513083 | 3.44641313  | 2.899231832 |
| PER1       | ENSG00000179094.15 | 3.939916422 | 2.996233185 | 3.23909443  |
| ARL6       | ENSG00000113966.9  | 3.581737396 | 3.346043777 | 3.328775353 |
| ZBTB44     | ENSG00000196323.12 | 4.573628081 | 3.134150326 | 3.563790851 |
| MYBL1      | ENSG00000185697.16 | 3.662418629 | 3.3675402   | 2.864438401 |
| LMBRD2     | ENSG00000164187.6  | 2.930512559 | 2.888915541 | 3.623371433 |
| C14orf93   | ENSG00000100802.14 | 3.247157747 | 2.956519407 | 3.768277861 |
| MAP1S      | ENSG00000130479.10 | 4.2226418   | 4.927871972 | 4.517374334 |
| SYNJ2      | ENSG00000078269.14 | 4.757122239 | 2.838809641 | 3.05277408  |
| LYRM1      | ENSG00000102897.9  | 4.211296603 | 3.921007797 | 4.362351335 |
| FAM81A     | ENSG00000157470.11 | 3.448609538 | 4.887867782 | 5.279140128 |
| MSL3P1     | ENSG00000224287.2  | 3.806941459 | 4.021317685 | 2.904882282 |
| NUDT16     | ENSG00000198585.11 | 3.266850945 | 3.902631921 | 3.067122433 |
| AL161911.1 | ENSG00000214654.7  | 4.135406633 | 4.526743424 | 2.803447834 |
| LPCAT2     | ENSG00000087253.12 | 5.029097619 | 3.177843295 | 2.971768155 |
| ZSCAN26    | ENSG00000197062.11 | 2.84997223  | 2.996325485 | 4.461328818 |
| RAB8B      | ENSG00000166128.12 | 4.173115633 | 2.899965821 | 4.829721764 |
| HERC3      | ENSG00000138641.15 | 3.062528501 | 2.929707806 | 4.120304045 |
| TOE1       | ENSG00000132773.11 | 5.496415735 | 3.978926435 | 2.957982224 |
| SLC35G1    | ENSG00000176273.14 | 4.44191829  | 4.368535595 | 2.835003213 |
| ZNF440     | ENSG00000171295.12 | 4.205065915 | 3.731354862 | 3.336883763 |
| ZNF675     | ENSG00000197372.9  | 4.031547816 | 3.425835364 | 3.345142908 |
| OSBPL7     | ENSG00000006025.11 | 3.531571095 | 3.159147678 | 4.550253793 |
| RCOR1      | ENSG00000089902.9  | 4.641955204 | 4.029296101 | 2.830081525 |
| MPND       | ENSG00000008382.15 | 3.590636314 | 4.151466633 | 4.235003715 |
| ZC3H8      | ENSG00000144161.12 | 2.998418251 | 3.216429932 | 3.491488532 |
| ARHGAP10   | ENSG00000071205.11 | 3.818588194 | 3.214746351 | 3.449150619 |
| ZNF526     | ENSG00000167625.10 | 3.66020768  | 4.653743108 | 3.192022462 |
| PLEKHA2    | ENSG00000169499.14 | 2.892170066 | 5.025841001 | 5.487432813 |
| CEP44      | ENSG00000164118.12 | 3.839796651 | 3.159592161 | 3.343726924 |
| MT-TW      | ENSG00000210117.1  | 2.873810139 | 3.93341833  | 3.092649287 |
| SIPA1L1    | ENSG00000197555.9  | 3.955816072 | 4.960143329 | 3.149692126 |
| GXYLT1     | ENSG00000151233.10 | 3.838012759 | 4.232841482 | 2.805136254 |
| MAPKAPK5   | ENSG00000089022.13 | 4.443960806 | 3.865700544 | 2.972644651 |
| ZNF436     | ENSG00000125945.14 | 4.375364598 | 3.225250377 | 3.483602147 |
| SMIM20     | ENSG00000250317.8  | 6.007298602 | 4.45046048  | 6.710459514 |
| TRAIP      | ENSG00000183763.8  | 4.329866008 | 3.80067777  | 2.878117455 |
| PTRH1      | ENSG00000187024.14 | 3.794246316 | 5.111342594 | 3.237792073 |
| CARD8      | ENSG00000105483.17 | 3.817966483 | 3.543061872 | 4.879947063 |
| TASP1      | ENSG00000089123.15 | 3.729193028 | 3.709979469 | 2.858692301 |

|             |                    |             |             |             |
|-------------|--------------------|-------------|-------------|-------------|
| PTOV1-AS2   | ENSG00000269352.1  | 4.219456275 | 4.146313821 | 3.846942351 |
| GSTCD       | ENSG00000138780.14 | 3.984368419 | 3.567836319 | 2.803376711 |
| JPX         | ENSG00000225470.7  | 4.155123167 | 4.179097732 | 3.77555216  |
| MMS22L      | ENSG00000146263.11 | 3.940181229 | 3.175165015 | 3.036138052 |
| RAD54B      | ENSG00000197275.13 | 3.742353732 | 3.039251315 | 2.930370829 |
| STK17B      | ENSG00000081320.10 | 2.82881423  | 4.685231227 | 4.765664573 |
| ZNF397      | ENSG00000186812.12 | 3.539189086 | 3.5495004   | 3.924892289 |
| MTF1        | ENSG00000188786.9  | 4.166702369 | 3.19577953  | 2.825317833 |
| PDXDC2P-NPI | ENSG00000196696.12 | 3.266573657 | 4.285478868 | 5.178061428 |
| SENP7       | ENSG00000138468.15 | 2.942461032 | 3.123704789 | 3.92763757  |
| C3orf67     | ENSG00000163689.19 | 3.005241674 | 3.896058007 | 3.547104211 |
| SREK1IP1    | ENSG00000153006.15 | 3.835333329 | 2.873399558 | 4.019967253 |
| PYROXD1     | ENSG00000121350.15 | 4.56794156  | 4.003197755 | 5.078269597 |
| ZNF558      | ENSG00000167785.8  | 3.37367649  | 4.550717802 | 4.306380115 |
| SEMA4F      | ENSG00000135622.12 | 2.950271613 | 4.201800835 | 4.056715662 |
| CRCP        | ENSG00000241258.6  | 3.518512165 | 3.438721447 | 3.608870904 |
| ZRANB1      | ENSG00000019995.6  | 4.560850858 | 3.567683806 | 4.211080066 |
| CBX8        | ENSG00000141570.10 | 4.015159382 | 3.956980127 | 3.378057783 |
| SPATA5L1    | ENSG00000171763.18 | 4.00432662  | 3.303999993 | 3.233183574 |
| EPB41L1     | ENSG00000088367.21 | 4.272245727 | 5.250565291 | 3.017605732 |
| MBTD1       | ENSG00000011258.15 | 3.678726258 | 3.497946566 | 3.833995599 |
| FAM161A     | ENSG00000170264.12 | 3.072286495 | 4.797848497 | 3.269661077 |
| ASB13       | ENSG00000196372.12 | 4.641728811 | 3.065716399 | 5.076917542 |
| ENTPD5      | ENSG00000187097.12 | 3.643130866 | 2.796944639 | 3.498598125 |
| JADE3       | ENSG00000102221.13 | 3.252930566 | 4.141767391 | 3.118447434 |
| ZNF473      | ENSG00000142528.15 | 4.031165538 | 3.391987225 | 3.719378032 |
| GTF2H2C     | ENSG00000183474.15 | 3.787401918 | 3.120074716 | 2.955556067 |
| C5orf42     | ENSG00000197603.13 | 3.140368358 | 2.816469999 | 3.974456661 |
| ID1         | ENSG00000125968.8  | 7.968255418 | 5.289065173 | 2.974558819 |
| AHDC1       | ENSG00000126705.13 | 4.274919994 | 4.408237435 | 3.534622176 |
| OPA3        | ENSG00000125741.4  | 4.39612882  | 2.839313519 | 3.296722255 |
| LRP4        | ENSG00000134569.9  | 3.264153836 | 3.994880713 | 5.284979627 |
| FBXL4       | ENSG00000112234.8  | 2.773674814 | 3.553896699 | 3.092661386 |
| PLS1        | ENSG00000120756.12 | 4.076466158 | 4.497985887 | 4.354725636 |
| THAP6       | ENSG00000174796.12 | 3.363894924 | 3.359689616 | 3.943785561 |
| CCDC57      | ENSG00000176155.18 | 4.265156066 | 4.441560962 | 5.967447395 |
| CPEB4       | ENSG00000113742.12 | 3.659450155 | 3.115452756 | 5.869439989 |
| CCDC134     | ENSG00000100147.13 | 2.960693467 | 3.770178556 | 3.492382146 |
| ZBTB41      | ENSG00000177888.7  | 3.675438924 | 3.514191808 | 3.513135572 |
| STXBP5      | ENSG00000164506.14 | 2.965439399 | 3.483232732 | 3.525406343 |
| UBN2        | ENSG00000157741.14 | 3.14077192  | 3.26360386  | 3.061534565 |
| ACCS        | ENSG00000110455.13 | 3.618312981 | 4.947696444 | 4.292838576 |
| RNF216P1    | ENSG00000196204.11 | 3.956204203 | 4.469519233 | 3.771055624 |
| FIZ1        | ENSG00000179943.7  | 4.498177607 | 2.854013116 | 4.20149334  |
| C12orf65    | ENSG00000130921.7  | 3.062681553 | 2.881771342 | 3.233120863 |
| POLL        | ENSG00000166169.16 | 4.838130481 | 4.001905406 | 4.162124553 |

|            |                    |             |             |             |
|------------|--------------------|-------------|-------------|-------------|
| ZNF205     | ENSG00000122386.10 | 4.035655427 | 3.750844388 | 4.575430438 |
| PTPDC1     | ENSG00000158079.14 | 2.999106286 | 4.56329595  | 3.927776089 |
| PEX3       | ENSG00000034693.14 | 4.49211141  | 4.215084296 | 3.514609035 |
| RAB11FIP2  | ENSG00000107560.10 | 4.320055042 | 3.342308394 | 4.102411453 |
| CYB561D2   | ENSG00000114395.10 | 3.956905737 | 3.706187055 | 2.787839922 |
| CARMIL1    | ENSG00000079691.17 | 2.74331283  | 4.634869309 | 4.957536033 |
| DPH6       | ENSG00000134146.11 | 3.815048336 | 2.756979638 | 4.192346965 |
| PLA2G15    | ENSG00000103066.12 | 3.231379301 | 3.097278354 | 3.808147774 |
| B9D1       | ENSG00000108641.14 | 5.566125696 | 4.569185481 | 2.906306748 |
| SNORD104   | ENSG00000199753.1  | 5.750793034 | 4.685361238 | 4.457863099 |
| SH3RF1     | ENSG00000154447.14 | 3.728818942 | 2.827995036 | 4.004611394 |
| KIAA0355   | ENSG00000166398.12 | 3.698168741 | 2.774481573 | 4.575987169 |
| C17orf75   | ENSG00000108666.9  | 4.305172856 | 3.403937141 | 5.074457052 |
| ORA12      | ENSG00000160991.15 | 6.003049874 | 5.892344624 | 4.572649531 |
| GSKIP      | ENSG00000100744.14 | 4.710995605 | 4.053231711 | 3.353359447 |
| NFXL1      | ENSG00000170448.11 | 4.707100201 | 3.642913803 | 4.38212467  |
| NBPF3      | ENSG00000142794.18 | 3.510782464 | 3.706539202 | 3.647977671 |
| AL392172.1 | ENSG00000228106.5  | 4.407254531 | 3.128190913 | 3.076722674 |
| GADD45A    | ENSG00000116717.11 | 5.185661426 | 5.915811915 | 6.463339629 |
| ABRAXAS1   | ENSG00000163322.13 | 2.8896327   | 3.047695011 | 3.191617    |
| AGO1       | ENSG00000092847.11 | 5.068192666 | 3.549392387 | 3.959896888 |
| FCMR       | ENSG00000162894.11 | 2.872201806 | 3.382243197 | 5.260394198 |
| HAUS7      | ENSG00000213397.10 | 3.799283298 | 3.578261727 | 2.929196228 |
| TMEM131L   | ENSG00000121210.15 | 2.85957463  | 3.659185994 | 2.888230199 |
| MICALL2    | ENSG00000164877.18 | 3.698640647 | 5.83766449  | 3.786573808 |
| ERCC6      | ENSG00000225830.12 | 4.210114078 | 3.0541011   | 3.526781586 |
| TCF7L2     | ENSG00000148737.16 | 5.980170279 | 3.614421834 | 3.321719575 |
| C2CD2L     | ENSG00000172375.12 | 4.566858329 | 2.899892612 | 4.080391405 |
| ZNF516     | ENSG00000101493.10 | 4.442953855 | 5.351905912 | 4.963998513 |
| ARL4C      | ENSG00000188042.7  | 4.389790331 | 4.836531158 | 2.780063542 |
| SETMAR     | ENSG00000170364.12 | 3.035934201 | 3.074259526 | 2.778528339 |
| PFKFB3     | ENSG00000170525.19 | 6.070807057 | 5.161461327 | 5.680034487 |
| FLVCR1     | ENSG00000162769.12 | 4.636384027 | 2.743988797 | 3.045374675 |
| MCUB       | ENSG00000005059.15 | 5.228775924 | 2.871495776 | 4.97002598  |
| MINCR      | ENSG00000253716.5  | 3.975624396 | 3.174898934 | 3.25563166  |
| S1PR2      | ENSG00000267534.2  | 4.871751869 | 2.842299987 | 2.987340577 |
| DNAJC22    | ENSG00000178401.14 | 4.157081057 | 3.388137364 | 3.313958395 |
| OVCA2      | ENSG00000262664.2  | 3.686022096 | 2.807445604 | 3.132305324 |
| G2E3       | ENSG00000092140.14 | 4.215078323 | 2.874615782 | 3.047171091 |
| STK39      | ENSG00000198648.10 | 2.846346971 | 4.463866997 | 5.021636571 |
| CDC40      | ENSG00000168438.14 | 4.163600461 | 3.202792716 | 3.24431874  |
| CNTLN      | ENSG00000044459.14 | 3.884732063 | 2.866809015 | 2.835655742 |
| C21orf2    | ENSG00000160226.15 | 2.978477309 | 3.229866876 | 4.455080223 |
| SNCA       | ENSG00000145335.15 | 4.417655141 | 6.794055179 | 7.321668312 |
| DEPDC1B    | ENSG00000035499.12 | 5.560185355 | 2.810315182 | 2.849943944 |
| DIAPH2     | ENSG00000147202.17 | 3.821916669 | 3.792869166 | 3.685982071 |

|           |                    |             |             |             |
|-----------|--------------------|-------------|-------------|-------------|
| KIAA1549  | ENSG00000122778.9  | 4.329841122 | 3.06292637  | 3.345404649 |
| NCALD     | ENSG00000104490.17 | 3.343165759 | 4.42135078  | 2.742690629 |
| ZNF680    | ENSG00000173041.11 | 3.834166013 | 3.60020331  | 2.828607284 |
| LRR8C     | ENSG00000171488.14 | 3.032881348 | 3.669715239 | 4.749608625 |
| KIF14     | ENSG00000118193.11 | 5.557322559 | 3.720196776 | 2.734407334 |
| COX19     | ENSG00000240230.5  | 2.726585181 | 3.450876726 | 3.332627697 |
| ING4      | ENSG00000111653.19 | 4.822124318 | 3.070661795 | 4.128310938 |
| QKI       | ENSG00000112531.16 | 3.959857889 | 3.326205226 | 3.418566113 |
| IFT74     | ENSG00000096872.15 | 5.0871921   | 2.929536177 | 2.815909102 |
| TSPAN14   | ENSG00000108219.14 | 6.002786953 | 4.916249538 | 7.952374934 |
| TSEN2     | ENSG00000154743.17 | 4.08804846  | 3.516800594 | 2.911840901 |
| RPL23AP42 | ENSG00000234851.4  | 4.228132092 | 3.349068456 | 3.759326293 |
| MFSD6     | ENSG00000151690.14 | 2.801086216 | 5.357307982 | 5.821563907 |
| RPL23AP82 | ENSG00000184319.15 | 2.865341975 | 4.788762706 | 4.152864888 |
| LIAS      | ENSG00000121897.14 | 4.122476565 | 2.868318302 | 5.099192422 |
| YIPF6     | ENSG00000181704.11 | 3.293688485 | 4.232470976 | 3.255836455 |
| ZNF710    | ENSG00000140548.9  | 3.370299547 | 2.865875658 | 2.927638134 |
| SNX33     | ENSG00000173548.8  | 3.922818073 | 3.973137088 | 3.87894301  |
| SLC2A11   | ENSG00000133460.19 | 3.318680316 | 4.448045563 | 4.632570001 |
| SGF29     | ENSG00000176476.8  | 4.682043225 | 2.849167682 | 3.736045706 |
| CGRRF1    | ENSG00000100532.11 | 2.900237824 | 3.006218857 | 3.699862913 |
| TMTC3     | ENSG00000139324.11 | 4.592407962 | 3.737881641 | 2.785105298 |
| ZNF28     | ENSG00000198538.10 | 3.429139459 | 3.329314859 | 3.217602845 |
| C12orf73  | ENSG00000204954.9  | 4.072391145 | 3.088698047 | 3.077417531 |
| ZNF304    | ENSG00000131845.14 | 3.524402618 | 2.741113035 | 3.631883077 |
| ZNRF2P2   | ENSG00000225264.3  | 3.109118011 | 3.949637172 | 3.610170217 |
| ACADS     | ENSG00000122971.8  | 3.064397938 | 3.917927064 | 5.523300198 |
| SYNE2     | ENSG00000054654.16 | 3.180452987 | 3.83330198  | 4.9049707   |
| DICER1    | ENSG00000100697.14 | 4.396487379 | 3.994926306 | 2.733446785 |
| HMGA2     | ENSG00000149948.13 | 6.089517598 | 5.989741438 | 5.675123588 |
| CREB1     | ENSG00000118260.14 | 3.250416804 | 3.266141667 | 2.890080545 |
| IFT27     | ENSG00000100360.14 | 2.802559621 | 4.121619552 | 5.738900198 |
| UNKL      | ENSG00000059145.18 | 4.113495278 | 3.719540374 | 3.586784585 |
| CYB5A     | ENSG00000166347.18 | 2.859177726 | 4.759359234 | 3.625434473 |
| ARRDC1    | ENSG00000197070.13 | 4.378050723 | 4.92982606  | 4.786712313 |
| TBL1X     | ENSG00000101849.15 | 6.09083009  | 3.437735901 | 4.505739583 |
| L2HGDH    | ENSG00000087299.11 | 3.67360927  | 3.001147931 | 3.425578663 |
| ITPKC     | ENSG00000086544.2  | 3.511195393 | 3.810440762 | 4.063815227 |
| NANP      | ENSG00000170191.4  | 3.754768677 | 3.715622784 | 2.738136675 |
| MOCS1     | ENSG00000124615.17 | 3.475201808 | 3.585982786 | 3.073793653 |
| TRIM39    | ENSG00000204599.14 | 3.424104279 | 3.147983112 | 3.564244748 |
| TSHZ1     | ENSG00000179981.9  | 4.705894189 | 3.823328695 | 5.549579455 |
| ZDHHC18   | ENSG00000204160.11 | 3.401475145 | 3.799597291 | 3.479221204 |
| EFCAB7    | ENSG00000203965.12 | 4.020920191 | 3.472327283 | 3.833338473 |
| CCNG2     | ENSG00000138764.14 | 3.575834135 | 3.883460636 | 4.231139148 |
| SEPT7P2   | ENSG00000214765.8  | 3.92233022  | 4.494760769 | 3.908808049 |

|            |                    |             |             |             |
|------------|--------------------|-------------|-------------|-------------|
| EIF3C      | ENSG00000184110.14 | 4.386929055 | 3.62481243  | 4.095780424 |
| NOL3       | ENSG00000140939.14 | 4.638324909 | 2.793369544 | 5.041887405 |
| FANCE      | ENSG00000112039.3  | 3.463760653 | 2.831793391 | 2.97601021  |
| RAB4A      | ENSG00000168118.11 | 4.176766047 | 2.949122266 | 4.30121931  |
| EVI5L      | ENSG00000142459.8  | 2.831081488 | 3.122923995 | 3.047444187 |
| CBFA2T2    | ENSG00000078699.21 | 2.943465647 | 3.192725104 | 4.046299927 |
| FUT10      | ENSG00000172728.15 | 2.961282479 | 3.450944017 | 3.057869794 |
| NAIF1      | ENSG00000171169.8  | 4.685944201 | 4.204781752 | 3.385490827 |
| FADS2      | ENSG00000134824.13 | 4.192551417 | 2.740070735 | 3.250874154 |
| KIF21A     | ENSG00000139116.18 | 4.750447373 | 4.721176381 | 2.762656081 |
| ZNRF2P1    | ENSG00000237004.3  | 2.765153074 | 2.681900334 | 3.085256412 |
| AC135977.1 | ENSG00000226268.3  | 3.109147165 | 3.215869929 | 3.61609534  |
| DAGLB      | ENSG00000164535.14 | 4.499755668 | 4.158551882 | 3.084818599 |
| IKZF5      | ENSG00000095574.11 | 4.350020381 | 3.311954395 | 3.877112354 |
| PEX2       | ENSG00000164751.14 | 4.214302271 | 3.349922478 | 3.991154084 |
| PXMP4      | ENSG00000101417.11 | 2.702236157 | 2.818341266 | 3.933500479 |
| TAF1A      | ENSG00000143498.17 | 4.807669064 | 3.275464001 | 2.876451853 |
| PGGT1B     | ENSG00000164219.9  | 3.669313367 | 2.726162636 | 3.237630121 |
| TBC1D22B   | ENSG00000065491.8  | 2.745706647 | 3.928007335 | 3.862580604 |
| TMEM199    | ENSG00000244045.12 | 4.786518039 | 4.94752868  | 4.852409403 |
| ISG15      | ENSG00000187608.8  | 3.180070589 | 4.674521031 | 2.789650842 |
| SDSL       | ENSG00000139410.14 | 3.265097339 | 4.854058067 | 3.214304089 |
| NUDT16L1   | ENSG00000168101.14 | 3.287883049 | 3.493376555 | 3.094342579 |
| CBLB       | ENSG00000114423.18 | 3.273316283 | 3.487630981 | 3.508561368 |
| PRDM2      | ENSG00000116731.22 | 4.36049524  | 3.906384362 | 4.68681095  |
| RTN2       | ENSG00000125744.11 | 4.337577109 | 3.21568404  | 3.816058434 |
| PIGL       | ENSG00000108474.16 | 3.43357701  | 2.918222016 | 3.481769704 |
| DDX20      | ENSG00000064703.11 | 4.211099007 | 3.276555537 | 2.725222571 |
| SUV39H2    | ENSG00000152455.15 | 4.511208568 | 3.267522208 | 3.369993274 |
| MPLKIP     | ENSG00000168303.6  | 3.162106198 | 3.812143961 | 3.187022545 |
| C15orf40   | ENSG00000169609.13 | 3.676389538 | 3.137752414 | 2.896836064 |
| HOXC9      | ENSG00000180806.4  | 4.036679743 | 3.33076696  | 3.021120695 |
| FHL1       | ENSG00000022267.16 | 3.73922085  | 4.358473667 | 3.482235133 |
| HELZ2      | ENSG00000130589.16 | 3.846916488 | 4.172326914 | 2.849245384 |
| SDCCAG8    | ENSG00000054282.15 | 4.952016216 | 3.028802874 | 4.503856358 |
| CCDC126    | ENSG00000169193.11 | 3.285005328 | 3.396221817 | 3.639082009 |
| CCNJL      | ENSG00000135083.14 | 4.595745448 | 3.183723766 | 3.452455066 |
| ZCCHC6     | ENSG00000083223.17 | 4.272896525 | 4.743218868 | 3.112418151 |
| C11orf1    | ENSG00000137720.7  | 4.616498595 | 3.131570482 | 4.419470704 |
| WDR37      | ENSG00000047056.14 | 3.534599516 | 2.994079618 | 4.557212343 |
| ZNF346     | ENSG00000113761.11 | 4.303360917 | 2.910021328 | 3.046857477 |
| STIL       | ENSG00000123473.15 | 4.703415181 | 3.618662096 | 2.750669132 |
| STEAP1     | ENSG00000164647.8  | 2.834082363 | 5.362491805 | 3.690992503 |
| FAXDC2     | ENSG00000170271.10 | 3.80077211  | 2.975547546 | 4.445871827 |
| SMCR8      | ENSG00000176994.10 | 4.739057706 | 4.004919048 | 4.999303318 |
| NHLRC2     | ENSG00000196865.4  | 4.160193407 | 3.122937978 | 3.895645112 |



|            |                    |             |             |             |
|------------|--------------------|-------------|-------------|-------------|
| SLX4       | ENSG00000188827.10 | 3.654706607 | 2.65558514  | 3.074287164 |
| ZNRF2      | ENSG00000180233.10 | 2.840688985 | 3.935809608 | 3.446817275 |
| PLPP1      | ENSG00000067113.16 | 4.6006532   | 3.682233329 | 2.74882356  |
| ZNHIT2     | ENSG00000174276.6  | 5.151470472 | 4.356546309 | 3.336233807 |
| CRYBB2P1   | ENSG00000100058.12 | 3.22457072  | 4.556610866 | 4.684286263 |
| SESN1      | ENSG00000080546.13 | 3.710243428 | 4.442359237 | 4.374958261 |
| KBTBD6     | ENSG00000165572.7  | 4.248935694 | 3.535151441 | 2.698650277 |
| AC073857.1 | ENSG00000280120.1  | 3.336006345 | 3.342055828 | 4.330116284 |
| MRAS       | ENSG00000158186.12 | 3.942280189 | 3.72671007  | 3.743589528 |
| LRRC23     | ENSG00000010626.14 | 3.703423597 | 3.749706752 | 4.633691773 |
| WDR83      | ENSG00000123154.11 | 4.549715331 | 3.142948919 | 3.062048803 |
| FBXL14     | ENSG00000171823.6  | 3.951179584 | 3.022444301 | 4.807651521 |
| BTBD19     | ENSG00000222009.8  | 3.774418261 | 4.898112274 | 3.482008068 |
| RIC1       | ENSG00000107036.11 | 4.320598402 | 3.717789254 | 3.264002652 |
| HOXA5      | ENSG00000106004.4  | 4.72885417  | 3.617708838 | 2.795704225 |
| ZNF350     | ENSG00000256683.6  | 3.039539594 | 3.540315678 | 3.468338723 |
| NPHP1      | ENSG00000144061.12 | 3.282298032 | 3.082249778 | 3.519336794 |
| DDHD1      | ENSG00000100523.14 | 3.160184445 | 2.90334535  | 3.196417921 |
| EGR1       | ENSG00000120738.7  | 5.398224173 | 4.75121772  | 6.670394954 |
| FASTKD3    | ENSG00000124279.11 | 4.591221967 | 4.372139047 | 2.684038319 |
| PCGF6      | ENSG00000156374.14 | 5.085047164 | 3.147170284 | 3.588125307 |
| C19orf47   | ENSG00000160392.13 | 4.164010757 | 4.092882995 | 3.128943841 |
| STK26      | ENSG00000134602.15 | 4.201597251 | 4.89719747  | 4.364799832 |
| SLC9A3R2   | ENSG00000065054.13 | 6.811710682 | 4.824970961 | 2.728135355 |
| HOXC6      | ENSG00000197757.7  | 4.295767771 | 3.857901118 | 3.351404439 |
| RASA2      | ENSG00000155903.11 | 4.114485506 | 4.11606708  | 3.830975772 |
| NRBP2      | ENSG00000185189.17 | 3.27228487  | 5.452870831 | 3.030441146 |
| PRMT9      | ENSG00000164169.12 | 3.458153643 | 3.060748346 | 3.239453399 |
| CDCA4      | ENSG00000170779.10 | 5.728497234 | 5.3230053   | 2.85082784  |
| DZIP1L     | ENSG00000158163.14 | 2.700619648 | 3.53651953  | 2.798938037 |
| CCDC159    | ENSG00000183401.11 | 2.690445415 | 3.357002828 | 4.161440151 |
| DHX58      | ENSG00000108771.12 | 3.090664572 | 3.798654491 | 4.438267273 |
| EME2       | ENSG00000197774.12 | 3.748577692 | 3.647668354 | 3.303847143 |
| GPR161     | ENSG00000143147.14 | 4.324427179 | 6.341965095 | 2.888997909 |
| LRRC37B    | ENSG00000185158.12 | 2.93620583  | 3.706745383 | 3.932532803 |
| FKBPL      | ENSG00000204315.3  | 3.907224286 | 3.586720081 | 2.678284746 |
| PLK4       | ENSG00000142731.10 | 4.519537318 | 3.449727337 | 2.667464878 |
| VLDLR      | ENSG00000147852.15 | 3.752893666 | 5.220719734 | 4.52382792  |
| HGH1       | ENSG00000235173.6  | 3.855121873 | 2.917611615 | 2.804351921 |
| LBHD1      | ENSG00000162194.12 | 4.364963534 | 3.988302874 | 3.015500603 |
| ZNF184     | ENSG00000096654.15 | 3.465603199 | 2.68329678  | 3.379359388 |
| ATXN7L1    | ENSG00000146776.14 | 2.801426777 | 3.788772303 | 3.433204931 |
| HLA-F      | ENSG00000204642.13 | 3.063628559 | 4.410331912 | 5.489947982 |
| MCM10      | ENSG00000065328.16 | 5.222778532 | 2.932332519 | 2.661013139 |
| PAWR       | ENSG00000177425.10 | 4.270603722 | 3.996568351 | 4.58772522  |
| SLC26A11   | ENSG00000181045.14 | 3.281087186 | 4.47451506  | 5.144584156 |

|            |                    |             |             |             |
|------------|--------------------|-------------|-------------|-------------|
| CKMT2-AS1  | ENSG00000247572.7  | 3.987092725 | 4.21296992  | 4.824837661 |
| UMAD1      | ENSG00000219545.11 | 3.234287656 | 3.514744224 | 3.560857441 |
| HAUS5      | ENSG00000249115.8  | 3.939999524 | 3.674630647 | 2.642414443 |
| TUBD1      | ENSG00000108423.14 | 3.428347116 | 2.726957421 | 2.91345951  |
| ACSS1      | ENSG00000154930.14 | 4.61517603  | 5.860704878 | 2.714076124 |
| PDSS2      | ENSG00000164494.11 | 3.854851158 | 3.893863338 | 3.216848704 |
| SHPK       | ENSG00000197417.7  | 3.393579442 | 3.303769911 | 3.49509505  |
| DNAJC17    | ENSG00000104129.9  | 4.613059963 | 3.832244168 | 3.339677548 |
| LINC00847  | ENSG00000245060.6  | 3.195014751 | 2.730354632 | 5.058262731 |
| TBC1D22A   | ENSG00000054611.13 | 4.232382055 | 4.697814362 | 4.516997568 |
| RNF38      | ENSG00000137075.17 | 4.377458254 | 3.831723253 | 4.140712156 |
| IRS2       | ENSG00000185950.8  | 6.990491353 | 5.306907605 | 5.610716061 |
| GTDC1      | ENSG00000121964.14 | 2.920814337 | 3.149078415 | 3.847947966 |
| FAM122A    | ENSG00000187866.8  | 3.40760675  | 3.916381109 | 2.821059911 |
| ZUFSP      | ENSG00000153975.9  | 3.873048287 | 3.571189071 | 3.492685345 |
| CEP68      | ENSG00000011523.13 | 3.085444019 | 3.25849818  | 3.118870053 |
| ARHGAP32   | ENSG00000134909.18 | 3.770808053 | 3.325825473 | 5.384751725 |
| AGFG2      | ENSG00000106351.12 | 3.181428003 | 2.93846049  | 2.814091823 |
| DCP2       | ENSG00000172795.15 | 3.579255837 | 2.983346923 | 3.946961968 |
| PDPK1      | ENSG00000140992.18 | 4.0501557   | 2.918826917 | 4.589783875 |
| GPR89A     | ENSG00000117262.18 | 2.994424312 | 3.819456956 | 2.883850785 |
| ASB1       | ENSG00000065802.11 | 3.399442748 | 3.29799038  | 4.014729566 |
| FRMD4A     | ENSG00000151474.21 | 7.282680279 | 7.15464244  | 5.796815462 |
| MTBP       | ENSG00000172167.7  | 4.346536057 | 3.340554059 | 2.676992611 |
| MAP1LC3A   | ENSG00000101460.12 | 4.136494445 | 4.050162292 | 2.708683143 |
| HYLS1      | ENSG00000198331.10 | 4.865005858 | 2.761779377 | 3.195127184 |
| ARMCX6     | ENSG00000198960.10 | 2.875779145 | 4.546108665 | 4.148369657 |
| DHRS1      | ENSG00000157379.13 | 3.487070316 | 3.718183386 | 2.696467691 |
| BTN3A2     | ENSG00000186470.13 | 3.528509436 | 4.026855626 | 3.642075824 |
| TRAF6      | ENSG00000175104.14 | 2.751286269 | 3.471927036 | 3.790250334 |
| SUV39H1    | ENSG00000101945.16 | 4.648071094 | 3.452027071 | 3.091638748 |
| RAB21      | ENSG00000080371.5  | 3.750859242 | 3.581165359 | 2.712621532 |
| GOLGA8A    | ENSG00000175265.17 | 3.757349628 | 5.004779237 | 2.811715408 |
| CNBD2      | ENSG00000149646.12 | 3.744246988 | 2.78364713  | 3.045803544 |
| CH17-340M2 | ENSG00000197180.2  | 2.804652286 | 2.754476364 | 3.137870072 |
| DDX12P     | ENSG00000214826.5  | 2.984901267 | 2.919292612 | 2.93250457  |
| RBMS2      | ENSG00000076067.12 | 3.580754976 | 3.219581755 | 2.638718956 |
| SCD5       | ENSG00000145284.11 | 2.681361856 | 4.432818384 | 4.27170244  |
| AADAT      | ENSG00000109576.13 | 4.753137703 | 2.676531328 | 3.160327072 |
| PEX7       | ENSG00000112357.12 | 3.308017444 | 2.718209641 | 2.961275734 |
| MBD5       | ENSG00000204406.12 | 2.765624802 | 3.941219548 | 3.640972348 |
| MDN1       | ENSG00000112159.11 | 4.025926058 | 4.104874542 | 2.585910562 |
| WHAMM      | ENSG00000156232.7  | 2.786393867 | 2.837713419 | 3.256949963 |
| PGAP3      | ENSG00000161395.13 | 3.275339311 | 2.687637468 | 4.026148984 |
| ARNT2      | ENSG00000172379.20 | 5.936795407 | 5.053674464 | 6.298629601 |
| OGFOD2     | ENSG00000111325.16 | 4.114181522 | 3.244171246 | 5.076635381 |

|           |                    |             |             |             |
|-----------|--------------------|-------------|-------------|-------------|
| ZNF786    | ENSG00000197362.14 | 3.374671554 | 3.313510634 | 3.030183136 |
| PAQR3     | ENSG00000163291.14 | 3.732532611 | 4.294456693 | 3.951498194 |
| ISCA2     | ENSG00000165898.13 | 3.244876705 | 3.09852012  | 3.504685764 |
| VRK1      | ENSG00000100749.7  | 5.813632654 | 3.719528378 | 2.701528051 |
| AP4B1     | ENSG00000134262.12 | 4.510633875 | 3.902951275 | 2.876935156 |
| EP400NL   | ENSG00000185684.13 | 3.814207784 | 3.335217703 | 4.200161556 |
| DLEU2     | ENSG00000231607.10 | 5.652783522 | 3.414160506 | 2.59125912  |
| CLDN15    | ENSG00000106404.13 | 3.403839291 | 4.36666689  | 4.206107874 |
| RABL3     | ENSG00000144840.8  | 3.444790812 | 3.594008241 | 2.653184698 |
| HEG1      | ENSG00000173706.12 | 6.177984299 | 5.015778206 | 2.619293286 |
| CHMP4A    | ENSG00000254505.9  | 3.998022484 | 3.530322598 | 4.76765385  |
| ELOVL6    | ENSG00000170522.9  | 5.291798381 | 2.794121612 | 4.151416656 |
| SPATA6    | ENSG00000132122.11 | 4.524601575 | 3.033091165 | 2.83143786  |
| CBWD5     | ENSG00000147996.16 | 4.355724093 | 3.474191092 | 2.840046779 |
| TMEM198B  | ENSG00000182796.13 | 4.888092301 | 3.271757865 | 3.107315805 |
| TMEM53    | ENSG00000126106.13 | 3.744544628 | 3.080426535 | 2.63634848  |
| MAP3K4    | ENSG00000085511.19 | 4.251271617 | 3.860507429 | 2.795529738 |
| PLEKHG2   | ENSG00000090924.14 | 3.933011193 | 5.418535875 | 3.340932411 |
| JAK2      | ENSG00000096968.13 | 2.724285909 | 3.62137832  | 2.977310625 |
| ZNF584    | ENSG00000171574.17 | 3.80752946  | 3.207345055 | 3.617913446 |
| PAG1      | ENSG00000076641.4  | 2.657958371 | 6.033282119 | 3.562501307 |
| ARL4D     | ENSG00000175906.4  | 4.758513863 | 3.143498042 | 3.116938162 |
| DTWD2     | ENSG00000169570.9  | 3.554592511 | 3.613238105 | 3.548626172 |
| KNL1      | ENSG00000137812.19 | 5.065999939 | 3.418139637 | 2.617736322 |
| OTUD3     | ENSG00000169914.5  | 3.210890603 | 4.056390054 | 3.551591806 |
| RPL13AP25 | ENSG00000136149.6  | 4.117804508 | 3.6955834   | 3.206416571 |
| SLC25A35  | ENSG00000125434.10 | 3.453213159 | 2.938912372 | 3.129881564 |
| ZNF845    | ENSG00000213799.11 | 2.66218079  | 2.89896754  | 2.863220581 |
| ZNF707    | ENSG00000181135.15 | 3.988661938 | 4.081372602 | 3.359453931 |
| SYNGAP1   | ENSG00000197283.15 | 4.128183349 | 4.32440519  | 4.278496881 |
| FAM46A    | ENSG00000112773.15 | 5.019201208 | 3.830870054 | 2.568644634 |
| EFHC1     | ENSG00000096093.15 | 3.326342131 | 3.131816601 | 3.739925367 |
| TMEM250   | ENSG00000238227.7  | 3.984087893 | 4.014072023 | 3.776064126 |
| C18orf32  | ENSG00000177576.11 | 3.012692638 | 4.615559325 | 4.018843292 |
| LIF       | ENSG00000128342.4  | 4.869774323 | 5.52444083  | 8.357600869 |
| ENKD1     | ENSG00000124074.11 | 5.338431247 | 2.718291248 | 4.46665436  |
| ZNF496    | ENSG00000162714.12 | 5.366453132 | 2.69262888  | 4.402065024 |
| GCNT2     | ENSG00000111846.16 | 3.328903262 | 2.700476631 | 3.999292025 |
| SFR1      | ENSG00000156384.14 | 3.77156002  | 2.791376105 | 3.577812151 |
| ACADSB    | ENSG00000196177.12 | 3.753081704 | 3.655895057 | 4.237289493 |
| AUH       | ENSG00000148090.11 | 3.247377684 | 4.973639829 | 3.842205962 |
| VAV2      | ENSG00000160293.16 | 4.130774441 | 4.398368717 | 2.830882334 |
| WDFY2     | ENSG00000139668.8  | 3.49585116  | 3.333043748 | 2.625577822 |
| OSGIN1    | ENSG00000140961.12 | 2.805260156 | 4.423108843 | 4.524659695 |
| ADGRG1    | ENSG00000205336.11 | 7.137063659 | 8.403362228 | 9.585340852 |
| ZNF550    | ENSG00000251369.8  | 3.329597908 | 2.546501689 | 2.949377436 |

|            |                    |             |             |             |
|------------|--------------------|-------------|-------------|-------------|
| B4GALT6    | ENSG00000118276.11 | 5.14164862  | 4.686427053 | 5.292439088 |
| OCEL1      | ENSG00000099330.8  | 5.009018866 | 3.869591516 | 3.592834738 |
| ANKRD9     | ENSG00000156381.8  | 3.082763394 | 4.673803612 | 2.865884292 |
| ZNF417     | ENSG00000173480.10 | 3.171935511 | 2.794085575 | 3.209312407 |
| GAD1       | ENSG00000128683.13 | 2.658233101 | 4.2767246   | 3.651806409 |
| FANCF      | ENSG00000183161.4  | 3.075073363 | 3.932958069 | 3.504892861 |
| ZNF646     | ENSG00000167395.10 | 3.853481196 | 3.082998033 | 3.193513603 |
| HS6ST1     | ENSG00000136720.6  | 3.255576409 | 3.286546531 | 2.567333911 |
| AC083799.1 | ENSG00000203644.3  | 3.836015895 | 3.052775524 | 3.450696505 |
| AP001972.5 | ENSG00000279117.1  | 2.626823151 | 3.744825473 | 5.023180608 |
| ZFP62      | ENSG00000196670.13 | 3.226217969 | 3.107473747 | 4.328834124 |
| WDR7       | ENSG00000091157.13 | 3.399865397 | 3.765244815 | 3.48856809  |
| NKAP       | ENSG00000101882.9  | 4.003317131 | 3.493287495 | 3.844220661 |
| NIFK-AS1   | ENSG00000236859.6  | 3.455370501 | 3.288008596 | 2.779814951 |
| DBNDD2     | ENSG00000244274.7  | 3.281167717 | 2.654451276 | 6.27675808  |
| C17orf53   | ENSG00000125319.14 | 4.194039826 | 3.603679685 | 2.568985927 |
| SLC35A3    | ENSG00000117620.14 | 3.673632269 | 2.734878517 | 3.459808587 |
| NBEAL2     | ENSG00000160796.16 | 3.824582816 | 4.547600138 | 3.277067784 |
| AASDH      | ENSG00000157426.13 | 3.865059475 | 2.783876443 | 3.084485674 |
| MTM1       | ENSG00000171100.14 | 3.580616317 | 3.480095102 | 3.018842955 |
| FANCC      | ENSG00000158169.12 | 4.253351614 | 3.657201415 | 2.789058213 |
| RHEBL1     | ENSG00000167550.10 | 3.464360923 | 3.136244367 | 2.601578025 |
| METAP1D    | ENSG00000172878.13 | 2.732147062 | 3.548136631 | 4.496520796 |
| FAM98C     | ENSG00000130244.12 | 3.340801457 | 3.415964816 | 3.711220741 |
| UBE2D1     | ENSG00000072401.14 | 3.939962773 | 3.377399263 | 4.045730469 |
| PPIAP22    | ENSG00000198618.5  | 3.822753792 | 3.844556562 | 2.80681025  |
| FAM126B    | ENSG00000155744.9  | 2.583835063 | 4.296900855 | 4.001097314 |
| GLB1L      | ENSG00000163521.15 | 2.979019388 | 3.391117507 | 3.296213812 |
| SPSB2      | ENSG00000111671.9  | 4.172769501 | 3.412560515 | 3.520712668 |
| LARGE1     | ENSG00000133424.20 | 2.606000435 | 4.555081928 | 3.215426036 |
| ZNF280D    | ENSG00000137871.19 | 4.985162179 | 4.341946351 | 5.097247919 |
| PIK3C2B    | ENSG00000133056.13 | 3.097883218 | 4.152067388 | 3.111640663 |
| FAM57A     | ENSG00000167695.14 | 4.45827932  | 3.523726995 | 2.666636849 |
| TMCO6      | ENSG00000113119.12 | 4.253237239 | 2.984663211 | 2.738896715 |
| NEK1       | ENSG00000137601.16 | 3.549361514 | 3.121336197 | 3.77988754  |
| TIMM23B    | ENSG00000204152.10 | 3.2559216   | 3.056532816 | 3.256762133 |
| URB1-AS1   | ENSG00000256073.3  | 3.018766974 | 2.978457759 | 4.252764991 |
| TBPL1      | ENSG00000028839.9  | 5.068287978 | 3.154977421 | 3.431596822 |
| HBEGF      | ENSG00000113070.7  | 2.695395059 | 2.590767424 | 3.330299594 |
| FBXO10     | ENSG00000147912.12 | 2.829493181 | 2.892707427 | 3.781362888 |
| PEX11A     | ENSG00000166821.8  | 3.156831948 | 2.592000173 | 3.007211297 |
| AC093673.1 | ENSG00000232533.1  | 2.767410726 | 3.158145124 | 2.89412894  |
| HILPDA     | ENSG00000135245.9  | 4.491114943 | 4.772072473 | 3.390598339 |
| TBCK       | ENSG00000145348.16 | 3.034945602 | 2.624407362 | 3.688190636 |
| GCA        | ENSG00000115271.10 | 2.601021544 | 4.634391759 | 4.345828804 |
| DGKG       | ENSG00000058866.14 | 3.12920117  | 3.240160341 | 3.644421107 |

|            |                    |             |             |             |
|------------|--------------------|-------------|-------------|-------------|
| C19orf54   | ENSG00000188493.14 | 3.726958153 | 3.456465891 | 2.874961086 |
| ACER3      | ENSG00000078124.11 | 3.388850107 | 3.597048973 | 4.578696588 |
| MITF       | ENSG00000187098.14 | 5.511926637 | 8.554122358 | 8.311537309 |
| ZNF766     | ENSG00000196214.10 | 3.037270227 | 2.993066771 | 3.108139787 |
| ERMARD     | ENSG00000130023.15 | 4.166883704 | 3.076179905 | 3.844887688 |
| YDJC       | ENSG00000161179.13 | 3.968471519 | 3.633970279 | 3.718372086 |
| ATP6V0E2   | ENSG00000171130.17 | 4.50460896  | 4.031207924 | 5.426061853 |
| KIAA1147   | ENSG00000257093.6  | 3.736907714 | 4.002309334 | 3.741868025 |
| NETO2      | ENSG00000171208.9  | 5.206942596 | 3.655927957 | 3.486668114 |
| WDPCP      | ENSG00000143951.15 | 2.736391848 | 3.667727751 | 4.125173193 |
| ZNF160     | ENSG00000170949.17 | 3.619598159 | 3.431046363 | 3.70525133  |
| BAG2       | ENSG00000112208.11 | 3.684245407 | 2.652856158 | 3.443667334 |
| MBLAC2     | ENSG00000176055.9  | 3.79487917  | 3.23065956  | 3.962406071 |
| MKL2       | ENSG00000186260.16 | 3.390802199 | 3.183345739 | 3.886305117 |
| C9orf3     | ENSG00000148120.16 | 5.293856326 | 4.572171243 | 4.828644971 |
| PRPF40B    | ENSG00000110844.13 | 4.431963823 | 4.059449113 | 4.50975677  |
| IFIT5      | ENSG00000152778.8  | 5.005790321 | 2.604143829 | 3.950059756 |
| FOXO4      | ENSG00000184481.16 | 3.733099063 | 3.839421729 | 4.369405973 |
| PDE4B      | ENSG00000184588.17 | 3.123026796 | 5.616848969 | 2.694684616 |
| RMRP       | ENSG00000277027.1  | 3.702250284 | 3.781351118 | 3.099767885 |
| ZNRF1      | ENSG00000186187.11 | 4.467694188 | 3.753154724 | 5.088779013 |
| HAUS2      | ENSG00000137814.10 | 3.400483225 | 4.51929852  | 3.751467471 |
| AC009403.1 | ENSG00000216895.9  | 3.063862187 | 3.01777417  | 3.191959203 |
| ACTR3B     | ENSG00000133627.17 | 4.014765613 | 3.725673857 | 2.671560928 |
| IKBKE      | ENSG00000263528.7  | 3.516653093 | 2.66074079  | 2.964902459 |
| NOL4L      | ENSG00000197183.14 | 4.439689047 | 4.392844464 | 5.010492409 |
| NUDCD2     | ENSG00000170584.10 | 4.064415036 | 2.783636297 | 4.087726456 |
| AMMECR1    | ENSG00000101935.9  | 4.431702632 | 3.83586001  | 2.5792986   |
| STX6       | ENSG00000135823.13 | 3.845476066 | 3.990975826 | 3.071227525 |
| WASF1      | ENSG00000112290.12 | 5.481450468 | 3.658446486 | 2.651157511 |
| RP9P       | ENSG00000205763.13 | 2.607206735 | 3.98290704  | 4.125296194 |
| CDK5R1     | ENSG00000176749.8  | 2.81418064  | 4.857624209 | 6.162327334 |
| AP1S3      | ENSG00000152056.16 | 2.714659071 | 5.099537362 | 4.848057998 |
| PRKX       | ENSG00000183943.5  | 3.703798886 | 3.092348737 | 3.626781697 |
| BOLA2-SMG1 | ENSG00000261740.6  | 4.222577485 | 3.311868442 | 2.832744979 |
| KIAA1586   | ENSG00000168116.13 | 3.427046972 | 3.346370103 | 3.43189558  |
| AMACR      | ENSG00000242110.7  | 5.334014773 | 3.612304715 | 3.4357054   |
| PRRT1      | ENSG00000204314.10 | 3.800166644 | 3.809278858 | 3.029984821 |
| FRRS1      | ENSG00000156869.12 | 2.660412701 | 2.941367272 | 2.919743725 |
| CRTC1      | ENSG00000105662.15 | 4.170931239 | 3.54289764  | 3.392647715 |
| PTBP2      | ENSG00000117569.18 | 3.97106191  | 3.021947352 | 2.933662957 |
| ARRDC2     | ENSG00000105643.9  | 4.837442995 | 4.776189274 | 3.38385615  |
| CLN8       | ENSG00000182372.9  | 3.566027244 | 3.113531031 | 3.774588919 |
| TRPM8      | ENSG00000144481.16 | 3.503092542 | 4.555007509 | 4.712971529 |
| SGMS1      | ENSG00000198964.13 | 3.248454655 | 3.054576615 | 2.779665065 |
| AC073508.3 | ENSG00000278834.1  | 3.756525877 | 3.348095792 | 3.644281735 |

|            |                    |             |             |             |
|------------|--------------------|-------------|-------------|-------------|
| PDCD2L     | ENSG00000126249.7  | 4.422885153 | 3.838013388 | 3.475488881 |
| SNX16      | ENSG00000104497.13 | 3.476259483 | 3.138909941 | 2.971440828 |
| EPG5       | ENSG00000152223.12 | 2.889063615 | 5.203928539 | 5.188883978 |
| ZNF7       | ENSG00000147789.15 | 4.820041809 | 3.677850287 | 3.882852558 |
| BPHL       | ENSG00000137274.12 | 2.600555458 | 4.426394959 | 5.028509141 |
| C15orf39   | ENSG00000167173.18 | 4.267427441 | 5.333401311 | 2.883913177 |
| HAUS8      | ENSG00000131351.14 | 4.901577448 | 4.571001477 | 2.62175625  |
| POMK       | ENSG00000185900.9  | 3.269547449 | 3.076308762 | 3.013043893 |
| ZNF764     | ENSG00000169951.9  | 3.345667338 | 2.988355991 | 3.134853099 |
| LMF1       | ENSG00000103227.18 | 2.745964628 | 3.259005015 | 3.406986074 |
| MYO6       | ENSG00000196586.13 | 3.470790413 | 4.089170059 | 4.908628428 |
| PBX3       | ENSG00000167081.16 | 4.645815693 | 3.814378376 | 3.353009556 |
| BCAM       | ENSG00000187244.10 | 2.972252015 | 2.799700645 | 2.64388014  |
| SAYSD1     | ENSG00000112167.9  | 3.342639153 | 2.623671665 | 4.372121529 |
| GLI4       | ENSG00000250571.6  | 4.662621078 | 4.002279768 | 3.51100121  |
| ASB9       | ENSG00000102048.15 | 4.761536355 | 2.759775315 | 2.913893706 |
| MTMR3      | ENSG00000100330.15 | 3.399902671 | 4.128846423 | 4.811455554 |
| ZNF283     | ENSG00000167637.16 | 3.508350747 | 2.792806607 | 3.38035951  |
| ABHD14A    | ENSG00000248487.8  | 4.344366278 | 3.796513918 | 2.614348768 |
| NMT2       | ENSG00000152465.17 | 3.420717332 | 3.14243112  | 2.699751642 |
| MT-TY      | ENSG00000210144.1  | 4.936280999 | 5.38497966  | 4.398851924 |
| TDRKH      | ENSG00000182134.15 | 4.358926045 | 4.294035864 | 4.297713657 |
| MEIS3P1    | ENSG00000179277.9  | 3.300246187 | 3.201441816 | 3.28613437  |
| PHLDB3     | ENSG00000176531.10 | 3.877489359 | 3.597852675 | 3.701401332 |
| NME3       | ENSG00000103024.7  | 3.951915093 | 3.180447446 | 3.426723631 |
| ESCO2      | ENSG00000171320.14 | 4.22493711  | 3.709275831 | 2.492063949 |
| SLC36A4    | ENSG00000180773.14 | 3.755212619 | 2.617828489 | 3.086386591 |
| SKIL       | ENSG00000136603.13 | 4.81522726  | 4.559512069 | 3.683028519 |
| SLC25A16   | ENSG00000122912.14 | 2.847770553 | 4.787206604 | 3.517236423 |
| KREMEN1    | ENSG00000183762.12 | 2.541142888 | 5.319854238 | 4.895987959 |
| FAM213B    | ENSG00000157870.14 | 2.780655927 | 3.597773016 | 3.955967243 |
| OLMALINC   | ENSG00000235823.2  | 4.798419104 | 2.658307716 | 3.896887432 |
| ETS2       | ENSG00000157557.11 | 4.364297667 | 2.73383866  | 3.806684707 |
| PSAT1      | ENSG00000135069.13 | 8.42326301  | 7.943547252 | 7.687825571 |
| KLHL23     | ENSG00000213160.9  | 3.063079692 | 3.705325041 | 4.358610126 |
| LIN52      | ENSG00000205659.10 | 3.587064004 | 3.411233883 | 3.147891255 |
| DTWD1      | ENSG00000104047.14 | 4.235155062 | 3.768764739 | 3.359568204 |
| C11orf95   | ENSG00000188070.9  | 4.31664089  | 4.18950231  | 3.436829412 |
| ARHGEF9    | ENSG00000131089.15 | 4.106104367 | 2.741417841 | 3.062638463 |
| DNLZ       | ENSG00000213221.4  | 4.989937547 | 4.575307584 | 4.125057265 |
| ZNF302     | ENSG00000089335.20 | 3.186424489 | 3.528049147 | 3.069339879 |
| SPOPL      | ENSG00000144228.8  | 2.986397088 | 3.191013073 | 4.343110687 |
| AP001372.2 | ENSG00000254837.2  | 2.654398008 | 2.854622494 | 3.97955333  |
| RAB3A      | ENSG00000105649.9  | 4.35895014  | 5.607099372 | 5.369859774 |
| ST6GALNAC6 | ENSG00000160408.14 | 3.224821965 | 3.735235756 | 2.672455139 |
| DNMT3A     | ENSG00000119772.16 | 2.780195797 | 3.813073209 | 4.750905915 |

|            |                    |             |             |             |
|------------|--------------------|-------------|-------------|-------------|
| GEMIN8     | ENSG00000046647.13 | 3.879900908 | 2.571107295 | 3.916974905 |
| HELQ       | ENSG00000163312.10 | 3.119787652 | 3.024520578 | 2.799084941 |
| COMTD1     | ENSG00000165644.10 | 3.529835698 | 4.436960762 | 4.099779369 |
| MFSD8      | ENSG00000164073.10 | 3.367925695 | 3.222902591 | 2.811082402 |
| FGFRL1     | ENSG00000127418.14 | 6.018850091 | 4.352565476 | 3.852387017 |
| THUMPD2    | ENSG00000138050.14 | 3.201823836 | 3.2740898   | 2.592611342 |
| ZKSCAN2    | ENSG00000155592.15 | 3.526194325 | 3.127315018 | 3.425514586 |
| PRKAR2B    | ENSG00000005249.12 | 5.570977609 | 4.535181424 | 3.359889834 |
| NCOA7      | ENSG00000111912.19 | 5.248771983 | 2.797939654 | 4.55833851  |
| DBP        | ENSG00000105516.10 | 4.612643905 | 3.874482404 | 5.246351965 |
| ZNF81      | ENSG00000197779.13 | 2.817511773 | 2.840147496 | 2.764818477 |
| RRAS       | ENSG00000126458.3  | 4.522573178 | 5.439469875 | 2.969549586 |
| FCHSD2     | ENSG00000137478.14 | 4.539260774 | 4.20853674  | 3.872844176 |
| IL17RA     | ENSG00000177663.13 | 3.194846034 | 3.527940343 | 3.211900725 |
| ZNF197     | ENSG00000186448.14 | 4.179628785 | 3.66898599  | 4.635680569 |
| AC108010.1 | ENSG00000242588.5  | 2.624513856 | 4.098533118 | 4.06412963  |
| USP45      | ENSG00000123552.17 | 3.23100936  | 3.271607499 | 2.874238873 |
| ARHGAP19   | ENSG00000213390.10 | 4.57875591  | 3.163923698 | 3.641982482 |
| ZNF432     | ENSG00000256087.6  | 3.213639261 | 4.228726165 | 2.626672537 |
| FAM76B     | ENSG00000077458.12 | 4.625950958 | 2.675400166 | 4.317863341 |
| TRIM62     | ENSG00000116525.13 | 5.478527933 | 6.242827142 | 2.61859194  |
| CMIP       | ENSG00000153815.16 | 4.148089853 | 4.861001192 | 3.552430529 |
| POLE2      | ENSG00000100479.12 | 4.292140024 | 2.652133744 | 2.934935492 |
| RGS12      | ENSG00000159788.18 | 2.941322254 | 2.683810537 | 8.587292405 |
| USP18      | ENSG00000184979.9  | 2.52199318  | 3.458577764 | 3.722769277 |
| HES6       | ENSG00000144485.10 | 2.801347888 | 7.018879565 | 3.741720598 |
| ZNF672     | ENSG00000171161.12 | 4.853212688 | 3.830713216 | 3.318021688 |
| MTHFD2L    | ENSG00000163738.18 | 3.542358032 | 3.522513697 | 3.025935131 |
| IFIH1      | ENSG00000115267.5  | 2.696856381 | 4.15712489  | 4.500631702 |
| CDC42SE2   | ENSG00000158985.13 | 3.982138645 | 3.405837376 | 3.954727186 |
| PARS2      | ENSG00000162396.5  | 3.55861531  | 3.08480381  | 2.492917143 |
| ADARB1     | ENSG00000197381.15 | 3.111863755 | 3.345819422 | 5.790986358 |
| LIN7B      | ENSG00000104863.11 | 2.524525981 | 3.706954519 | 3.483700495 |
| ZNF566     | ENSG00000186017.14 | 3.86580071  | 2.690733972 | 2.713603835 |
| SASS6      | ENSG00000156876.9  | 4.877702602 | 3.161595283 | 2.531490055 |
| NRAV       | ENSG00000248008.2  | 3.650990748 | 3.927719419 | 4.158138298 |
| MANEAL     | ENSG00000185090.14 | 4.278391424 | 3.020840083 | 3.79434168  |
| TMEM170A   | ENSG00000166822.12 | 4.246019665 | 3.689197217 | 3.97026192  |
| CAMK4      | ENSG00000152495.10 | 3.704549568 | 2.546044683 | 3.775239052 |
| CAMKMT     | ENSG00000143919.14 | 3.412716808 | 3.70802846  | 2.580824414 |
| FBXO4      | ENSG00000151876.12 | 3.771028611 | 3.112189564 | 2.455928205 |
| ZNF703     | ENSG00000183779.6  | 2.470151383 | 7.69603509  | 7.178552187 |
| PGAP1      | ENSG00000197121.14 | 2.494730924 | 3.548849835 | 3.425845454 |
| AC090204.1 | ENSG00000247134.6  | 2.762663236 | 4.901773241 | 3.993621328 |
| POLR2J3    | ENSG00000168255.19 | 3.334969367 | 3.973504295 | 3.570100649 |
| BEX4       | ENSG00000102409.9  | 3.511186773 | 5.405395796 | 6.928886643 |

|            |                    |             |             |             |
|------------|--------------------|-------------|-------------|-------------|
| KAZN       | ENSG00000189337.16 | 2.500144533 | 5.024531469 | 6.391381647 |
| AC005912.1 | ENSG00000227081.5  | 4.258902137 | 3.347163904 | 2.662864478 |
| ZNF26      | ENSG00000198393.7  | 3.57782874  | 2.961524694 | 2.994804936 |
| CPS1       | ENSG00000021826.14 | 3.808599627 | 4.417634659 | 2.583415591 |
| WDR20      | ENSG00000140153.17 | 3.399629072 | 3.262177474 | 2.633308557 |
| MFSD13A    | ENSG00000138111.14 | 2.941362132 | 2.617239023 | 3.140630165 |
| ACOT13     | ENSG00000112304.10 | 2.486775161 | 4.082774174 | 3.934409111 |
| ST6GALNAC4 | ENSG00000136840.18 | 4.576090175 | 4.818554942 | 2.558110824 |
| GPHN       | ENSG00000171723.15 | 3.905976123 | 2.698758865 | 3.532170996 |
| ZNF649     | ENSG00000198093.10 | 3.12262187  | 3.102127651 | 2.561115174 |
| RAC3       | ENSG00000169750.8  | 3.549222007 | 4.671365725 | 4.817086833 |
| BARD1      | ENSG00000138376.10 | 2.969661931 | 2.594329509 | 2.625311006 |
| METTL16    | ENSG00000127804.12 | 4.433080949 | 3.413450699 | 4.022617276 |
| LIN37      | ENSG00000267796.7  | 3.694888043 | 4.255233102 | 3.79414819  |
| DCLRE1B    | ENSG00000118655.4  | 4.098332825 | 3.242692956 | 2.639058394 |
| MMP15      | ENSG00000102996.4  | 3.78866603  | 2.489668889 | 3.665880362 |
| POLR3F     | ENSG00000132664.11 | 4.43694643  | 4.330370251 | 3.011191737 |
| KDM4B      | ENSG00000127663.14 | 4.047400467 | 4.293972721 | 4.052164689 |
| ZNF765     | ENSG00000196417.12 | 3.009831423 | 3.045760972 | 3.080548761 |
| OPHN1      | ENSG00000079482.12 | 4.546457673 | 5.494060056 | 2.578393751 |
| USF3       | ENSG00000176542.9  | 3.409109624 | 3.10861637  | 3.138431883 |
| WWC2       | ENSG00000151718.15 | 3.947209583 | 3.449254877 | 3.932818602 |
| KRCC1      | ENSG00000172086.7  | 3.727495274 | 4.122526438 | 3.276247038 |
| GPR157     | ENSG00000180758.11 | 2.702419869 | 4.40827852  | 3.347184803 |
| AC008560.1 | ENSG00000253251.2  | 3.047025189 | 2.518801948 | 3.165785593 |
| TTC12      | ENSG00000149292.16 | 3.70762885  | 2.773592813 | 3.003551831 |
| PJA1       | ENSG00000181191.11 | 3.642125504 | 4.639999305 | 4.525708217 |
| MSRB2      | ENSG00000148450.12 | 2.491152294 | 4.290150152 | 6.170795573 |
| ZNF836     | ENSG00000196267.12 | 2.649471014 | 2.670043202 | 3.193042341 |
| GORAB      | ENSG00000120370.12 | 4.489913163 | 3.474139801 | 3.990291017 |
| BBC3       | ENSG00000105327.17 | 3.649705509 | 3.677014466 | 5.434500109 |
| ZNF45      | ENSG00000124459.11 | 4.372716578 | 2.526545301 | 3.213977349 |
| ERN1       | ENSG00000178607.15 | 2.458396742 | 3.147625879 | 5.301435856 |
| C12orf29   | ENSG00000133641.17 | 5.321930049 | 3.976455379 | 2.455025655 |
| SLC24A1    | ENSG00000074621.13 | 3.174630847 | 2.94457474  | 3.833347474 |
| SLF1       | ENSG00000133302.12 | 4.698359938 | 2.651106802 | 3.009344305 |
| ZBED3      | ENSG00000132846.5  | 3.962711513 | 2.487014733 | 3.703835508 |
| BACE1      | ENSG00000186318.16 | 5.340999008 | 2.426994736 | 2.983613744 |
| TPM3P9     | ENSG00000241015.2  | 3.377626127 | 3.501936545 | 2.675902336 |
| FAM109A    | ENSG00000198324.13 | 3.33404991  | 3.315735534 | 2.692960912 |
| HMGNS      | ENSG00000198157.10 | 2.733065499 | 4.804830722 | 3.439155082 |
| POLI       | ENSG00000101751.10 | 3.258857447 | 3.568877736 | 3.658132417 |
| LINC-PINT  | ENSG00000231721.6  | 3.238192923 | 3.885977874 | 4.382386525 |
| CD82       | ENSG00000085117.11 | 2.727022704 | 5.338674345 | 6.186417011 |
| ZNF544     | ENSG00000198131.13 | 4.810578581 | 3.283462885 | 3.402289025 |
| ORC1       | ENSG00000085840.12 | 5.52858481  | 4.106313164 | 2.495468528 |



|            |                    |             |             |             |
|------------|--------------------|-------------|-------------|-------------|
| ARG2       | ENSG00000081181.7  | 4.452812308 | 2.748353822 | 4.623058812 |
| SESTD1     | ENSG00000187231.13 | 3.042958488 | 4.262541905 | 2.485160097 |
| KAZALD1    | ENSG00000107821.14 | 4.350030659 | 3.30423153  | 2.67887846  |
| CKB        | ENSG00000166165.12 | 5.710345615 | 5.935344883 | 4.475794817 |
| AC091729.3 | ENSG00000229043.2  | 3.686507735 | 3.715528673 | 2.744431331 |
| PDE7A      | ENSG00000205268.10 | 3.950341203 | 2.612586388 | 3.542702691 |
| MXD4       | ENSG00000123933.16 | 4.206031442 | 3.600566218 | 4.893693601 |
| ADCK5      | ENSG00000173137.11 | 2.75299465  | 3.421285234 | 2.512475063 |
| RAB11FIP1  | ENSG00000156675.15 | 3.288945899 | 3.464097458 | 4.086219729 |
| ZNF749     | ENSG00000186230.6  | 4.21218442  | 2.459350003 | 4.820673777 |
| HIVEP3     | ENSG00000127124.14 | 5.583004918 | 2.495541981 | 3.321249594 |
| FOSL2      | ENSG00000075426.11 | 3.004646836 | 6.8948074   | 3.478090999 |
| PGM3       | ENSG00000013375.15 | 4.221511923 | 4.359631643 | 4.120831481 |
| OSBPL5     | ENSG00000021762.19 | 3.581970676 | 4.671281429 | 3.234571507 |
| CREB3L4    | ENSG00000143578.15 | 4.845344842 | 3.92984926  | 2.946196769 |
| TTPAL      | ENSG00000124120.10 | 3.379981645 | 2.929271779 | 3.079006072 |
| ZNF365     | ENSG00000138311.15 | 3.463407103 | 3.324906978 | 4.548952959 |
| SPAG1      | ENSG00000104450.12 | 3.690100797 | 4.143849722 | 4.155827981 |
| DHODH      | ENSG00000102967.11 | 4.636460321 | 4.08947771  | 3.569604012 |
| SCAMP5     | ENSG00000198794.11 | 3.906236241 | 4.771686662 | 2.834185074 |
| HOXB4      | ENSG00000182742.5  | 3.931354251 | 2.759245223 | 3.978503977 |
| PRDM10     | ENSG00000170325.14 | 3.019556086 | 2.706884298 | 2.599154987 |
| BORCS6     | ENSG00000196544.7  | 3.257150353 | 2.855902657 | 2.417189128 |
| NAPEPLD    | ENSG00000161048.11 | 2.962087125 | 3.073483838 | 2.665555318 |
| SNORA8     | ENSG00000207304.1  | 4.543564796 | 2.777623921 | 4.867056879 |
| ARIH1      | ENSG00000166233.14 | 3.421102625 | 3.707452839 | 3.558741743 |
| TOGARAM1   | ENSG00000198718.12 | 3.143205205 | 2.86827422  | 3.108033306 |
| MAPK11     | ENSG00000185386.14 | 2.823900564 | 4.545738731 | 4.168075244 |
| ACSF2      | ENSG00000167107.12 | 2.580402832 | 6.540943739 | 4.073273754 |
| NAPB       | ENSG00000125814.17 | 2.631387264 | 3.809328712 | 2.648464461 |
| TIGD6      | ENSG00000164296.6  | 2.908451922 | 2.506763343 | 2.477078992 |
| EEF1AKMT2  | ENSG00000203791.14 | 4.136239898 | 2.421274497 | 3.902215665 |
| FAHD2B     | ENSG00000144199.11 | 3.629458127 | 6.200324366 | 5.379158638 |
| SLC9A6     | ENSG00000198689.10 | 2.619789573 | 3.001965487 | 3.283086946 |
| GRK5       | ENSG00000198873.11 | 5.215497458 | 3.445453863 | 3.701355439 |
| ARL5B      | ENSG00000165997.4  | 4.385335617 | 3.678906967 | 4.191392411 |
| TMEM116    | ENSG00000198270.12 | 3.478625968 | 2.924367185 | 2.478992691 |
| PYGO1      | ENSG00000171016.11 | 3.535499253 | 3.087393953 | 3.732425327 |
| RFX7       | ENSG00000181827.14 | 4.130547769 | 3.380986521 | 3.560810353 |
| MT-TD      | ENSG00000210154.1  | 2.960058382 | 5.519089953 | 3.661366815 |
| RPP14      | ENSG00000163684.11 | 3.556940119 | 3.413580393 | 2.67588358  |
| ATAD2B     | ENSG00000119778.14 | 3.024291355 | 2.980892817 | 2.411445479 |
| NSUN5P2    | ENSG00000106133.17 | 3.404064647 | 3.859087914 | 3.275245723 |
| PTGR2      | ENSG00000140043.11 | 3.051713528 | 2.484443331 | 2.998748998 |
| PMS2P3     | ENSG00000127957.17 | 3.468145547 | 4.01894136  | 3.390765353 |
| SLC44A1    | ENSG00000070214.15 | 5.727951354 | 6.737886045 | 2.547666971 |

|            |                    |             |             |             |
|------------|--------------------|-------------|-------------|-------------|
| ABTB1      | ENSG00000114626.17 | 3.94651162  | 4.278347272 | 4.47507433  |
| SMAD1      | ENSG00000170365.9  | 3.848407141 | 2.58384874  | 3.722872381 |
| AC016747.1 | ENSG00000212978.6  | 3.638513127 | 4.172778474 | 2.479224708 |
| SGK494     | ENSG00000167524.14 | 3.708783595 | 4.477387279 | 3.883904931 |
| ZNF780B    | ENSG00000128000.15 | 3.172951004 | 3.146014209 | 3.252889865 |
| ZC3H12C    | ENSG00000149289.10 | 2.435874666 | 3.009438082 | 4.840357691 |
| MSANTD2    | ENSG00000120458.10 | 3.587144915 | 2.432637427 | 3.036552931 |
| ZNF322     | ENSG00000181315.10 | 2.589291988 | 2.623567121 | 3.878338083 |
| TCF20      | ENSG00000100207.18 | 3.465471173 | 3.861302467 | 3.808943415 |
| ZNF767P    | ENSG00000133624.13 | 3.263488305 | 3.146613218 | 3.497538637 |
| C16orf87   | ENSG00000155330.9  | 4.457108848 | 2.493271826 | 3.229970081 |
| ALPK1      | ENSG00000073331.17 | 3.813167285 | 2.497369441 | 5.003383496 |
| ZNF559     | ENSG00000188321.13 | 3.109897405 | 4.237932556 | 3.754786886 |
| WFS1       | ENSG00000109501.13 | 2.996521403 | 3.528348714 | 7.34105711  |
| METTL15    | ENSG00000169519.20 | 3.142217813 | 3.279687812 | 4.191933873 |
| BBS9       | ENSG00000122507.20 | 3.082360685 | 4.298347271 | 4.79413706  |
| CEP57L1    | ENSG00000183137.14 | 3.394310187 | 3.331341569 | 2.545656223 |
| FBXW9      | ENSG00000132004.12 | 5.186811866 | 3.101027181 | 2.688685338 |
| DCLRE1C    | ENSG00000152457.17 | 2.846056526 | 3.310498482 | 3.588453249 |
| DLG5       | ENSG00000151208.16 | 4.767673908 | 2.4411213   | 4.068921548 |
| FHL2       | ENSG00000115641.18 | 5.089824358 | 5.507967638 | 6.51838856  |
| DNA2       | ENSG00000138346.14 | 4.335629009 | 2.508273829 | 2.801330924 |
| ZNF319     | ENSG00000166188.2  | 2.904527664 | 2.425901577 | 3.493531255 |
| MCPH1      | ENSG00000147316.12 | 3.998835935 | 2.414127581 | 4.23549067  |
| SFT2D3     | ENSG00000173349.5  | 2.483035633 | 3.104240781 | 2.908942043 |
| FAM172A    | ENSG00000113391.18 | 4.036752994 | 3.381818132 | 4.652170873 |
| PARP11     | ENSG00000111224.13 | 2.582954031 | 2.599340829 | 3.923045602 |
| PCYOX1L    | ENSG00000145882.10 | 3.349085151 | 3.057395382 | 3.06814502  |
| NIPSNAP3A  | ENSG00000136783.9  | 4.333856355 | 4.548277461 | 2.380800864 |
| C15orf41   | ENSG00000186073.11 | 3.43820335  | 3.109680422 | 3.298401082 |
| NAA30      | ENSG00000139977.13 | 3.27171828  | 3.597545747 | 3.679109471 |
| TARSL2     | ENSG00000185418.15 | 2.473977948 | 3.673345605 | 3.819452515 |
| ROR1       | ENSG00000185483.11 | 2.513046283 | 3.108791583 | 2.861458463 |
| TTK        | ENSG00000112742.9  | 5.091107651 | 3.668418689 | 2.52146958  |
| PIGV       | ENSG00000060642.10 | 3.769813338 | 3.651320527 | 3.080125317 |
| EHHADH     | ENSG00000113790.10 | 2.432297551 | 4.300854299 | 3.193938882 |
| FAM76A     | ENSG00000009780.15 | 3.23353544  | 3.280674944 | 2.537914053 |
| DFFB       | ENSG00000169598.15 | 3.247375305 | 3.449335295 | 2.519469583 |
| SPAST      | ENSG00000021574.11 | 3.421445244 | 2.823013643 | 3.108515948 |
| BTBD6      | ENSG00000184887.13 | 4.825638659 | 5.203119414 | 2.614403399 |
| CLK4       | ENSG00000113240.12 | 3.533441207 | 2.514964365 | 3.286542285 |
| PRKCZ      | ENSG00000067606.16 | 4.512495757 | 5.442881247 | 5.472597815 |
| PHF7       | ENSG00000010318.20 | 3.70750072  | 4.046774474 | 2.967885266 |
| ANTXR1     | ENSG00000169604.19 | 5.72582189  | 6.643814109 | 2.607559608 |
| FRAT2      | ENSG00000181274.6  | 5.098667967 | 3.345196883 | 3.460513612 |
| PKK1       | ENSG00000152256.13 | 3.086317252 | 2.663046687 | 3.782155171 |

|            |                    |             |             |             |
|------------|--------------------|-------------|-------------|-------------|
| HLA-DMB    | ENSG00000242574.8  | 5.086285983 | 3.60610316  | 2.959348715 |
| NR1H3      | ENSG00000025434.18 | 3.785174681 | 3.771006385 | 2.873901109 |
| CPVL       | ENSG00000106066.14 | 4.447474546 | 6.334946166 | 5.933688365 |
| ZNF275     | ENSG00000063587.13 | 2.813310011 | 4.349141625 | 3.24908751  |
| UBE2Q2P2   | ENSG00000259429.5  | 2.88045944  | 2.565889243 | 4.513980575 |
| HTRA1      | ENSG00000166033.11 | 7.2304314   | 7.044412273 | 2.474150963 |
| ZNF292     | ENSG00000188994.12 | 2.99913062  | 2.495227268 | 2.743545546 |
| TRMT61A    | ENSG00000166166.12 | 4.091255815 | 3.683375983 | 2.433295059 |
| AJUBA      | ENSG00000129474.15 | 3.865531427 | 2.378270546 | 3.39062403  |
| UPRT       | ENSG00000094841.13 | 3.707281788 | 2.994799338 | 3.451297563 |
| TNNT1      | ENSG00000105048.16 | 3.637520255 | 4.718528375 | 3.183554387 |
| DET1       | ENSG00000140543.14 | 3.278388639 | 2.868518742 | 3.250611543 |
| PARP8      | ENSG00000151883.17 | 3.760235775 | 3.809123108 | 4.433777126 |
| NPDC1      | ENSG00000107281.9  | 5.351127016 | 6.539095698 | 4.994406475 |
| KCTD21     | ENSG00000188997.7  | 2.412810864 | 3.742094686 | 3.277146101 |
| DBT        | ENSG00000137992.14 | 3.325143969 | 2.869309873 | 2.390007605 |
| PELI1      | ENSG00000197329.11 | 4.927805843 | 4.465710379 | 4.446305699 |
| PTER       | ENSG00000165983.14 | 2.86012693  | 2.521028819 | 4.35494891  |
| WASH4P     | ENSG00000234769.7  | 3.003609714 | 2.929691386 | 2.532008307 |
| PXYLP1     | ENSG00000155893.12 | 7.396730445 | 2.989141234 | 3.018024844 |
| ZBTB39     | ENSG00000166860.2  | 3.679611178 | 3.065603644 | 2.707230142 |
| MSC        | ENSG00000178860.8  | 4.125366375 | 2.426422592 | 5.135778603 |
| PMS2CL     | ENSG00000187953.10 | 3.336776969 | 3.833480446 | 3.311826289 |
| TMEM132A   | ENSG00000006118.14 | 4.678244527 | 5.482441131 | 2.401222183 |
| CSRNP1     | ENSG00000144655.14 | 3.793593985 | 2.847759484 | 2.942637692 |
| AC139887.2 | ENSG00000249592.5  | 3.030674713 | 2.556679079 | 4.432960984 |
| ITPR3      | ENSG00000096433.10 | 6.231738505 | 5.492416398 | 5.588309835 |
| MTRF1L     | ENSG00000112031.15 | 4.342138489 | 4.170706692 | 3.113387192 |
| EVA1C      | ENSG00000166979.12 | 2.609787172 | 4.068695059 | 2.803602783 |
| GTF2IP1    | ENSG00000277053.4  | 3.743114412 | 3.190705457 | 2.853776359 |
| MAPK8      | ENSG00000107643.15 | 3.613358745 | 2.883681834 | 2.695276499 |
| AC090498.1 | ENSG00000279483.2  | 4.738729247 | 3.889935532 | 2.712152781 |
| SIX5       | ENSG00000177045.7  | 4.804351922 | 3.260096362 | 2.537733412 |
| TRMO       | ENSG00000136932.13 | 3.610620572 | 3.469728616 | 2.615610625 |
| ELAC1      | ENSG00000141642.8  | 3.340578879 | 3.164316557 | 2.636125906 |
| VPS13B     | ENSG00000132549.18 | 3.307950895 | 3.276243491 | 3.615076457 |
| FOXD3-AS1  | ENSG00000230798.5  | 4.602028994 | 3.993524719 | 4.373574639 |
| C8orf82    | ENSG00000213563.6  | 3.730374079 | 2.74328945  | 4.027279374 |
| ITPR2      | ENSG00000123104.11 | 4.005556768 | 4.893964936 | 5.402349203 |
| C1orf21    | ENSG00000116667.12 | 3.290192495 | 4.057297881 | 4.061698001 |
| FAAP24     | ENSG00000131944.9  | 3.266759386 | 2.47679609  | 3.106331627 |
| RALGAPA1   | ENSG00000174373.16 | 3.342871958 | 3.301001411 | 3.735415116 |
| C14orf159  | ENSG00000133943.20 | 3.867675487 | 3.315206704 | 2.788477977 |
| ZBED8      | ENSG00000221886.3  | 3.359559896 | 2.877209496 | 3.232014606 |
| LINC01128  | ENSG00000228794.8  | 4.003058401 | 3.838644479 | 3.854544369 |
| LINC00909  | ENSG00000264247.1  | 3.347212425 | 3.189012286 | 3.511615834 |

|           |                    |             |             |             |
|-----------|--------------------|-------------|-------------|-------------|
| BBS5      | ENSG00000163093.11 | 2.409641932 | 5.625617656 | 4.515352325 |
| ZNF211    | ENSG00000121417.13 | 3.255289866 | 2.431871522 | 3.380800755 |
| L3HYPDH   | ENSG00000126790.11 | 4.57207933  | 4.0464744   | 2.768832082 |
| TMEM67    | ENSG00000164953.15 | 4.043826426 | 4.763976689 | 2.390327313 |
| ZNF616    | ENSG00000204611.6  | 3.017822873 | 3.603205537 | 2.700427    |
| ZBTB22    | ENSG00000236104.2  | 3.276820242 | 3.449131478 | 3.870116809 |
| ARHGEF10L | ENSG00000074964.16 | 2.553670415 | 3.653654312 | 3.570924882 |
| SERTAD1   | ENSG00000197019.4  | 3.963968044 | 3.452055247 | 3.663961259 |
| ASMTL     | ENSG00000169093.15 | 3.194408147 | 3.665874335 | 3.914214901 |
| CEP135    | ENSG00000174799.10 | 4.24016229  | 2.49603981  | 2.425854448 |
| CITED1    | ENSG00000125931.10 | 2.463465142 | 3.951081948 | 3.836924743 |
| NMNAT1    | ENSG00000173614.13 | 3.081785786 | 3.960798375 | 2.349437711 |
| ZDBF2     | ENSG00000204186.7  | 2.44969199  | 3.667083333 | 3.381398336 |
| DGKQ      | ENSG00000145214.13 | 3.625771399 | 3.695286637 | 5.94141295  |
| HFE       | ENSG00000010704.18 | 3.002298086 | 3.21130571  | 2.954609435 |
| DNAAF2    | ENSG00000165506.14 | 4.059883501 | 3.082585639 | 2.95361845  |
| DENND5B   | ENSG00000170456.15 | 4.585005092 | 4.085220994 | 2.423592494 |
| ANKRD49   | ENSG00000168876.8  | 3.453145052 | 2.952968485 | 3.004612526 |
| GRPEL2    | ENSG00000164284.14 | 4.245005123 | 3.167591317 | 4.085300868 |
| IFT140    | ENSG00000187535.13 | 4.288371004 | 3.196395762 | 4.3148578   |
| PC        | ENSG00000173599.13 | 5.115254455 | 5.042647681 | 3.892363818 |
| DOPEY2    | ENSG00000142197.12 | 2.526889146 | 3.168011448 | 4.220485169 |
| ZGRF1     | ENSG00000138658.15 | 3.514602587 | 2.774827608 | 2.566800873 |
| LCORL     | ENSG00000178177.15 | 3.541753175 | 2.672589395 | 6.227184737 |
| TMEM65    | ENSG00000164983.7  | 2.336235824 | 2.535719649 | 3.847533991 |
| CHST3     | ENSG00000122863.5  | 4.067560227 | 2.485235578 | 3.32183336  |
| TK2       | ENSG00000166548.15 | 3.478754606 | 2.642913753 | 5.146678565 |
| Y_RNA     | ENSG00000200090.1  | 2.952641807 | 2.880624422 | 3.273702846 |
| WDR89     | ENSG00000140006.11 | 3.856457171 | 2.525827543 | 3.771789202 |
| CHAC1     | ENSG00000128965.11 | 4.731200354 | 4.450052069 | 4.94925622  |
| RGL1      | ENSG00000143344.15 | 3.392746596 | 3.167416389 | 3.933899869 |
| IPPK      | ENSG00000127080.9  | 4.352843996 | 4.228779785 | 2.354384144 |
| ZNF354A   | ENSG00000169131.11 | 4.706895965 | 2.718379126 | 4.214356458 |
| CASP8AP2  | ENSG00000118412.12 | 4.00836874  | 3.17462169  | 2.372308436 |
| UBA6-AS1  | ENSG00000248049.6  | 2.858821052 | 2.900084172 | 4.209243394 |
| BHLHE41   | ENSG00000123095.5  | 2.392100938 | 6.999235886 | 5.487067322 |
| CTSK      | ENSG00000143387.12 | 5.842389976 | 2.385411716 | 2.630193561 |
| HEXDC     | ENSG00000169660.15 | 3.46687395  | 3.216990863 | 4.127621347 |
| TMEM62    | ENSG00000137842.6  | 4.211563505 | 4.246959326 | 4.395915771 |
| MIF4GD    | ENSG00000125457.13 | 4.260362473 | 4.185320996 | 4.033070395 |
| CINP      | ENSG00000100865.14 | 4.823980224 | 5.128173837 | 2.841568632 |
| SERPINB8  | ENSG00000166401.14 | 3.502842177 | 3.693238306 | 4.546708682 |
| TBX3      | ENSG00000135111.15 | 6.058293569 | 3.179474797 | 2.378992188 |
| MOCOS     | ENSG00000075643.5  | 5.809269457 | 5.523559188 | 4.012965432 |
| HSCB      | ENSG00000100209.9  | 3.743255901 | 4.094592023 | 4.027714736 |
| VTI1A     | ENSG00000151532.13 | 4.504616781 | 3.858713714 | 4.425639168 |

|            |                    |             |             |             |
|------------|--------------------|-------------|-------------|-------------|
| INO80D     | ENSG00000114933.15 | 2.418183475 | 2.965545961 | 3.023872997 |
| C11orf80   | ENSG00000173715.15 | 3.834036091 | 3.274831863 | 4.254089374 |
| HSF2       | ENSG00000025156.12 | 3.421203819 | 3.366117465 | 3.133620116 |
| GALNT10    | ENSG00000164574.15 | 4.3038423   | 4.195506206 | 4.048931614 |
| PITPNC1    | ENSG00000154217.14 | 5.707446835 | 2.786664505 | 3.173914953 |
| ATP9B      | ENSG00000166377.19 | 2.571554828 | 4.193389997 | 4.399292589 |
| ADAMTSL5   | ENSG00000185761.10 | 2.335840238 | 3.899637158 | 3.254529078 |
| SESN2      | ENSG00000130766.4  | 4.543993277 | 4.583644634 | 5.609283348 |
| RNASET2    | ENSG00000026297.15 | 2.742482016 | 3.50238416  | 4.465667556 |
| HECA       | ENSG00000112406.4  | 3.603475592 | 2.669574068 | 3.040324987 |
| RGS14      | ENSG00000169220.17 | 2.601587555 | 4.73078197  | 5.011215277 |
| ZNF83      | ENSG00000167766.18 | 4.032257629 | 4.767856785 | 5.225519565 |
| SNORD83A   | ENSG00000209482.1  | 3.746440084 | 3.877552928 | 2.565682119 |
| IER5L      | ENSG00000188483.7  | 4.760424933 | 4.629296514 | 2.714146571 |
| ADPRM      | ENSG00000170222.11 | 4.090079293 | 2.31900917  | 3.853764995 |
| ITPK1      | ENSG00000100605.16 | 6.571656201 | 5.889394714 | 2.955769057 |
| ARAP3      | ENSG00000120318.15 | 5.392952366 | 4.688959644 | 4.743251606 |
| C16orf62   | ENSG00000103544.14 | 5.892638301 | 4.256862504 | 2.547937563 |
| GTF2H2     | ENSG00000145736.14 | 3.549376106 | 2.641980366 | 3.842971025 |
| C7orf31    | ENSG00000153790.11 | 2.498394721 | 3.961626391 | 4.526390954 |
| PAXIP1-AS1 | ENSG00000273344.1  | 2.377026004 | 4.161952532 | 3.66496688  |
| CENPC      | ENSG00000145241.10 | 3.83002793  | 2.683817625 | 3.049372597 |
| EEFSEC     | ENSG00000132394.10 | 4.054432063 | 4.187508412 | 3.665842973 |
| ITGA2      | ENSG00000164171.10 | 5.068525691 | 3.190271117 | 2.767412642 |
| PHF8       | ENSG00000172943.19 | 4.773323687 | 3.979815007 | 4.252265051 |
| SOCS2      | ENSG00000120833.13 | 3.941549577 | 3.960756967 | 2.495421666 |
| TMEM234    | ENSG00000160055.19 | 3.149021399 | 3.402992503 | 2.916752029 |
| CEP128     | ENSG00000100629.16 | 2.882868663 | 2.53885026  | 3.692681982 |
| TET3       | ENSG00000187605.15 | 4.135391844 | 2.910102474 | 2.420536697 |
| JUN        | ENSG00000177606.6  | 2.939598065 | 2.2834036   | 2.965818884 |
| MTCL1      | ENSG00000168502.17 | 3.100194556 | 4.577256022 | 2.457891996 |
| PRR5       | ENSG00000186654.20 | 2.691788382 | 5.036480573 | 4.844922157 |
| METTL8     | ENSG00000123600.19 | 2.709216094 | 3.965243391 | 3.024668346 |
| ZDHHC12    | ENSG00000160446.18 | 4.346989486 | 5.173942107 | 2.694096877 |
| ZNF251     | ENSG00000198169.8  | 4.148837762 | 2.942235632 | 2.947045261 |
| JAZF1      | ENSG00000153814.11 | 3.762814088 | 5.335955392 | 2.493197454 |
| PPM1K      | ENSG00000163644.14 | 2.72022384  | 2.418010569 | 3.314727825 |
| ZNF256     | ENSG00000152454.3  | 2.502931718 | 2.396726128 | 3.213990423 |
| MIATNB     | ENSG00000244625.5  | 2.3017355   | 3.025707643 | 3.440026886 |
| FAM111B    | ENSG00000189057.10 | 4.649567862 | 2.35910055  | 3.505013985 |
| SUFU       | ENSG00000107882.11 | 4.634284636 | 3.511684056 | 2.726266043 |
| ATP10D     | ENSG00000145246.13 | 3.214399832 | 2.804349528 | 5.730165417 |
| ZNF557     | ENSG00000130544.11 | 3.396113413 | 3.125130811 | 2.322080262 |
| ATXN1      | ENSG00000124788.17 | 3.884006839 | 3.886818072 | 5.12805833  |
| EIF5A2     | ENSG00000163577.7  | 2.432335391 | 4.503998017 | 4.411961988 |
| FAHD1      | ENSG00000180185.11 | 4.882381248 | 6.178510403 | 5.732057379 |

|            |                    |             |             |             |
|------------|--------------------|-------------|-------------|-------------|
| NBPF8      | ENSG00000270231.3  | 2.83984265  | 3.40547715  | 2.303800146 |
| UVSSA      | ENSG00000163945.16 | 3.832174328 | 3.041876798 | 5.617500904 |
| GSE1       | ENSG00000131149.18 | 4.31729055  | 3.242942992 | 3.005950467 |
| MCEE       | ENSG00000124370.10 | 3.09785255  | 4.0967622   | 2.326330806 |
| CDKN2AIP   | ENSG00000168564.5  | 4.860331529 | 3.040963627 | 4.133097978 |
| L3MBTL3    | ENSG00000198945.7  | 2.929536569 | 3.649709179 | 2.594092839 |
| TNRC6C     | ENSG00000078687.17 | 3.117643096 | 2.680608064 | 3.005574223 |
| MED18      | ENSG00000130772.13 | 4.295571053 | 4.61136159  | 4.424305499 |
| CHRN1      | ENSG00000170175.10 | 3.569526516 | 2.844510335 | 3.764734454 |
| AC005562.1 | ENSG00000214719.11 | 3.663324125 | 2.990131913 | 3.786497823 |
| RIN3       | ENSG00000100599.15 | 3.688807765 | 2.87530604  | 3.114289275 |
| MRPL42     | ENSG00000198015.12 | 4.052000784 | 3.822249093 | 2.43406975  |
| SAMD8      | ENSG00000156671.12 | 2.951294415 | 3.385901911 | 3.737374851 |
| C16orf59   | ENSG00000162062.14 | 3.709667132 | 3.984538347 | 2.412713658 |
| RDH10      | ENSG00000121039.9  | 4.064516775 | 2.882908282 | 2.318061943 |
| TMEM177    | ENSG00000144120.12 | 3.307436101 | 3.613904212 | 2.684613524 |
| PGBD1      | ENSG00000137338.5  | 2.354718355 | 2.872994046 | 2.970740889 |
| TMEM107    | ENSG00000179029.14 | 4.149888636 | 2.723882546 | 2.3897247   |
| STK32C     | ENSG00000165752.16 | 4.266877598 | 2.338473878 | 4.016721837 |
| GAB1       | ENSG00000109458.8  | 2.320189154 | 2.764788837 | 2.963735776 |
| A1BG       | ENSG00000121410.11 | 2.75392525  | 3.227813174 | 3.797639273 |
| ZNF468     | ENSG00000204604.9  | 3.971219296 | 3.390480695 | 3.796448027 |
| GPR153     | ENSG00000158292.6  | 5.513325545 | 3.538446656 | 3.842233616 |
| BOLA3-AS1  | ENSG00000225439.2  | 3.159444967 | 2.899991483 | 3.101357275 |
| AL121832.2 | ENSG00000273619.1  | 3.381286971 | 2.474989203 | 2.990166113 |
| TLDC1      | ENSG00000140950.15 | 3.714506244 | 3.860945539 | 3.75316802  |
| ZBED1      | ENSG00000214717.11 | 3.668316612 | 2.688113724 | 4.423021365 |
| BCL2       | ENSG00000171791.12 | 2.366982226 | 4.089050544 | 3.160501043 |
| ST3GAL3    | ENSG00000126091.19 | 3.039643596 | 2.435486135 | 2.851459967 |
| HLA-DPB1   | ENSG00000223865.10 | 5.711296184 | 2.433246179 | 4.473627136 |
| MED29      | ENSG00000063322.13 | 5.767538674 | 5.862857759 | 4.338458889 |
| KMT5C      | ENSG00000133247.13 | 3.785521764 | 2.785979851 | 3.611822258 |
| PRR4       | ENSG00000111215.11 | 3.647502595 | 3.009339227 | 4.628388745 |
| EXOC6      | ENSG00000138190.16 | 4.107636107 | 2.730818812 | 4.793777047 |
| SNHG25     | ENSG00000266402.3  | 5.034261945 | 3.410520533 | 4.072032491 |
| ZNF446     | ENSG00000083838.15 | 3.772185074 | 3.057113239 | 3.084433462 |
| GMEB1      | ENSG00000162419.12 | 3.846592391 | 2.957399798 | 2.673233777 |
| TMEM185A   | ENSG00000269556.7  | 3.239749191 | 3.432072031 | 3.10861969  |
| ZNF567     | ENSG00000189042.13 | 2.433761887 | 3.143694628 | 2.682571236 |
| ZNF213-AS1 | ENSG00000263072.6  | 3.507048747 | 3.445510038 | 2.757251628 |
| KCTD11     | ENSG00000213859.4  | 3.256287562 | 2.296396285 | 2.517498604 |
| CNIH3      | ENSG00000143786.7  | 3.836191009 | 5.331247485 | 5.245680855 |
| ZNF586     | ENSG00000083828.15 | 4.241690408 | 2.528204282 | 3.788583334 |
| ASAP3      | ENSG00000088280.18 | 4.935173971 | 3.553497127 | 3.63659344  |
| ZNF430     | ENSG00000118620.12 | 3.898769337 | 3.058536772 | 3.152431171 |
| AC215219.1 | ENSG00000226210.3  | 3.483420998 | 3.425842368 | 5.109428387 |

|            |                    |             |             |             |
|------------|--------------------|-------------|-------------|-------------|
| JADE1      | ENSG00000077684.15 | 4.459908897 | 2.438001084 | 3.514829347 |
| TMEM143    | ENSG00000161558.10 | 2.565007121 | 2.584465183 | 2.642749054 |
| ARID3A     | ENSG00000116017.10 | 2.680183032 | 4.590664418 | 4.196109298 |
| LYN        | ENSG00000254087.7  | 3.666499402 | 3.492950229 | 3.648210934 |
| PPP1R3B    | ENSG00000173281.4  | 2.383113157 | 4.208496533 | 3.934208543 |
| FBXO16     | ENSG00000214050.7  | 2.457774762 | 3.842915474 | 2.593917491 |
| MAPKAPK5-A | ENSG00000234608.7  | 3.282699482 | 2.977270783 | 2.711033612 |
| ZCCHC2     | ENSG00000141664.9  | 2.60730317  | 3.264559372 | 2.866638808 |
| TRIM5      | ENSG00000132256.18 | 2.998152726 | 3.489630588 | 2.921980017 |
| CTU1       | ENSG00000142544.6  | 3.791044213 | 3.227379904 | 2.803927217 |
| APLP1      | ENSG00000105290.11 | 2.452797368 | 5.111536024 | 2.751884099 |
| CLCN2      | ENSG00000114859.15 | 4.02173656  | 4.123984281 | 2.468549396 |
| PWWP2B     | ENSG00000171813.13 | 3.320193103 | 2.561398364 | 3.43688906  |
| RAD51B     | ENSG00000182185.18 | 2.346447505 | 3.236575528 | 4.135462404 |
| ANKMY1     | ENSG00000144504.15 | 2.547359276 | 3.527669662 | 4.187877085 |
| PLEKHA3    | ENSG00000116095.10 | 2.294618905 | 2.920942153 | 3.544246884 |
| CTGF       | ENSG00000118523.5  | 5.108737072 | 2.343378758 | 4.718237797 |
| THBS3      | ENSG00000169231.13 | 4.464252586 | 4.074714598 | 3.451042614 |
| TSC22D3    | ENSG00000157514.16 | 2.325173248 | 2.954585369 | 4.985422631 |
| CYB5RL     | ENSG00000215883.10 | 2.250619004 | 2.942006583 | 3.126227466 |
| COL16A1    | ENSG00000084636.17 | 5.342484273 | 2.397651169 | 3.816412346 |
| IL16       | ENSG00000172349.17 | 2.674832585 | 4.55847414  | 6.641515673 |
| FOXO3      | ENSG00000118689.14 | 2.715396071 | 2.80873453  | 3.177306002 |
| KIAA1551   | ENSG00000174718.11 | 3.84453128  | 3.01013927  | 2.369412409 |
| THG1L      | ENSG00000113272.13 | 4.318125881 | 2.288571655 | 3.339224123 |
| ATXN7      | ENSG00000163635.17 | 3.686286767 | 3.340563043 | 3.024598484 |
| ZNF18      | ENSG00000154957.13 | 3.108586528 | 2.47094088  | 3.045932734 |
| GUSBP1     | ENSG00000183666.16 | 4.191251231 | 3.669561018 | 3.173358676 |
| TEF        | ENSG00000167074.14 | 3.057731679 | 2.865393217 | 4.571518493 |
| PRUNE1     | ENSG00000143363.15 | 4.474551706 | 3.80224248  | 3.166612266 |
| MYL5       | ENSG00000215375.6  | 3.959490962 | 2.715807759 | 3.56209528  |
| AL359915.2 | ENSG00000231365.5  | 3.877147961 | 2.51956282  | 2.273425787 |
| SPA17      | ENSG00000064199.6  | 3.643304044 | 2.213214014 | 3.613218989 |
| PLPP3      | ENSG00000162407.8  | 4.166870425 | 5.453151058 | 2.300303082 |
| E2F5       | ENSG00000133740.10 | 3.427944078 | 3.878450588 | 2.732165699 |
| ATG16L2    | ENSG00000168010.10 | 2.640805596 | 2.716522293 | 2.900608037 |
| KIN        | ENSG00000151657.11 | 2.375505961 | 3.623246006 | 5.093086233 |
| CCT6P1     | ENSG00000228409.6  | 3.249832795 | 2.956568162 | 2.346526232 |
| RUFY2      | ENSG00000204130.12 | 3.404205857 | 3.166634208 | 2.963626729 |
| FAM69A     | ENSG00000154511.11 | 2.307562417 | 4.930350179 | 2.693751139 |
| TRIM52     | ENSG00000183718.5  | 3.506808114 | 2.321544432 | 3.474617792 |
| ZBTB34     | ENSG00000177125.5  | 3.082999462 | 3.750273419 | 2.811227044 |
| NSUN5P1    | ENSG00000223705.9  | 2.9632441   | 3.302008433 | 3.104563763 |
| HERC5      | ENSG00000138646.8  | 2.599181185 | 4.317773394 | 4.372634623 |
| AL513302.2 | ENSG00000260766.1  | 2.832593709 | 2.768845655 | 2.578212691 |
| C12orf66   | ENSG00000174206.12 | 3.215476942 | 3.441092498 | 2.934705993 |

|            |                    |             |             |             |
|------------|--------------------|-------------|-------------|-------------|
| GSAP       | ENSG00000186088.15 | 2.772932382 | 3.864208875 | 4.078072464 |
| CHST12     | ENSG00000136213.9  | 3.133857638 | 3.471893689 | 2.581510578 |
| TIGD7      | ENSG00000140993.10 | 2.383551927 | 2.510597179 | 4.525179746 |
| TMEM120B   | ENSG00000188735.12 | 3.245805507 | 3.85225142  | 3.632518255 |
| VANGL1     | ENSG00000173218.14 | 3.003253667 | 3.177024908 | 2.552861378 |
| GPR3       | ENSG00000181773.6  | 3.89725814  | 3.696190691 | 2.237620978 |
| C20orf194  | ENSG00000088854.12 | 2.193840466 | 3.786077227 | 2.381690386 |
| AC037459.3 | ENSG00000253200.1  | 3.993278928 | 4.156564288 | 2.968533608 |
| DDX60L     | ENSG00000181381.13 | 2.456241526 | 3.435289276 | 3.395177134 |
| ZKSCAN4    | ENSG00000187626.8  | 2.262969758 | 2.729007728 | 2.807060055 |
| EXD2       | ENSG00000081177.18 | 3.615802037 | 4.003127639 | 4.114380984 |
| SNHG21     | ENSG00000250988.7  | 4.103933931 | 2.814164498 | 2.501823533 |
| ZNF213     | ENSG00000085644.13 | 3.749883418 | 3.159273136 | 3.062574349 |
| ZBTB45     | ENSG00000119574.12 | 4.483694583 | 3.782010505 | 3.577877255 |
| SRD5A1     | ENSG00000145545.11 | 3.603305849 | 3.887673145 | 2.506087106 |
| CBARP      | ENSG00000099625.12 | 2.605876172 | 3.777646882 | 3.184188594 |
| ATP6V1E2   | ENSG00000250565.6  | 3.973551655 | 2.25582383  | 6.565214086 |
| VCPKMT     | ENSG00000100483.13 | 2.625992284 | 2.582464355 | 2.710561746 |
| PYCR3      | ENSG00000104524.13 | 4.846721274 | 3.967811938 | 2.325827888 |
| ELP4       | ENSG00000109911.18 | 3.924552553 | 3.753000209 | 3.49787615  |
| SEC14L2    | ENSG00000100003.17 | 4.381706197 | 3.303087872 | 4.44249704  |
| FZD1       | ENSG00000157240.3  | 4.948720964 | 4.250128182 | 2.230224997 |
| TRIM47     | ENSG00000132481.6  | 4.830859702 | 5.188953428 | 5.878299534 |
| USP30      | ENSG00000135093.12 | 3.00088969  | 2.951424014 | 2.952754836 |
| DIRAS1     | ENSG00000176490.4  | 3.659140815 | 5.375941047 | 6.306504455 |
| ZSCAN30    | ENSG00000186814.13 | 2.452556023 | 3.658159232 | 4.206051415 |
| IQCG       | ENSG00000114473.13 | 2.724175188 | 3.276627376 | 2.306788157 |
| AL355309.1 | ENSG00000214748.2  | 3.566897277 | 2.431280142 | 2.886043756 |
| TRIM16     | ENSG00000221926.11 | 4.709648832 | 2.97590049  | 3.35538752  |
| ZBTB7B     | ENSG00000160685.13 | 3.96883241  | 4.348652316 | 3.443180848 |
| ZNF564     | ENSG00000249709.7  | 3.436703701 | 2.565166332 | 3.296803301 |
| ZNF16      | ENSG00000170631.14 | 3.170482798 | 2.509564161 | 3.12583043  |
| ADCY1      | ENSG00000164742.14 | 2.275451234 | 7.954674002 | 5.848756423 |
| PRTG       | ENSG00000166450.12 | 3.419302406 | 3.855808216 | 4.512409928 |
| FBXL8      | ENSG00000135722.8  | 3.002462521 | 2.653973271 | 2.582566901 |
| TNFRSF14   | ENSG00000157873.17 | 2.24007473  | 8.477132699 | 8.757246009 |
| C5orf34    | ENSG00000172244.8  | 4.328034715 | 3.780589016 | 2.341750528 |
| DLEU1      | ENSG00000176124.11 | 3.214625697 | 2.265092758 | 3.845592985 |
| PPP2R3B    | ENSG00000167393.17 | 3.688193151 | 2.476367035 | 3.763409255 |
| LYRM7      | ENSG00000186687.15 | 4.402827065 | 3.151799794 | 4.283899861 |
| CCDC107    | ENSG00000159884.11 | 2.70060591  | 3.795010297 | 2.344544554 |
| C19orf44   | ENSG00000105072.8  | 3.873193407 | 3.334455498 | 2.61451233  |
| RABL2B     | ENSG00000079974.17 | 3.838773691 | 3.605457679 | 3.535214224 |
| GNAI1      | ENSG00000127955.15 | 3.268751439 | 4.869382182 | 5.846584552 |
| BVES       | ENSG00000112276.13 | 3.159855783 | 3.860430025 | 2.250966537 |
| RNF125     | ENSG00000101695.8  | 4.503320333 | 6.047922997 | 2.960555837 |



|            |                    |             |             |             |
|------------|--------------------|-------------|-------------|-------------|
| ZNF236     | ENSG00000130856.15 | 2.821779058 | 3.085254967 | 2.913654444 |
| TIMM10B    | ENSG00000132286.11 | 4.748242772 | 6.015447224 | 6.060680114 |
| RPGR       | ENSG00000156313.12 | 4.814553775 | 2.570743492 | 3.386688704 |
| SMG1P1     | ENSG00000237296.9  | 3.055160016 | 3.1049318   | 3.306654791 |
| P3H2       | ENSG00000090530.9  | 3.445400815 | 4.971772854 | 5.731951441 |
| CCDC138    | ENSG00000163006.11 | 3.921783605 | 3.581078003 | 2.263907122 |
| BTBD7      | ENSG00000011114.14 | 3.783227298 | 3.628419521 | 2.241905867 |
| ASB16-AS1  | ENSG00000267080.5  | 3.616665576 | 2.736427218 | 2.644991458 |
| AC093323.1 | ENSG00000170846.16 | 5.034095071 | 2.415504582 | 4.978428163 |
| SLC45A3    | ENSG00000158715.5  | 4.877583087 | 2.154993775 | 2.96834557  |
| DOCK10     | ENSG00000135905.18 | 2.3769831   | 5.316602019 | 6.245514795 |
| FKTN       | ENSG00000106692.13 | 4.126252196 | 4.494132978 | 2.757447247 |
| ASTE1      | ENSG00000034533.11 | 2.64739666  | 2.618231162 | 2.444262699 |
| ZFPM1      | ENSG00000179588.8  | 2.477011613 | 2.693921061 | 3.278356696 |
| MCU        | ENSG00000156026.14 | 4.378890622 | 3.652710346 | 3.447371348 |
| SH3YL1     | ENSG00000035115.21 | 2.375681817 | 4.006520596 | 3.478812762 |
| GEN1       | ENSG00000178295.14 | 3.41569589  | 2.990480108 | 2.56517767  |
| SLC25A43   | ENSG00000077713.18 | 2.940486213 | 3.482273721 | 2.57427775  |
| RAB3D      | ENSG00000105514.7  | 3.870903725 | 3.800904348 | 3.777285424 |
| PTCD2      | ENSG00000049883.14 | 3.345264399 | 2.815339408 | 2.35099121  |
| CPT1B      | ENSG00000205560.12 | 3.968197994 | 4.60875978  | 4.635277575 |
| C11orf71   | ENSG00000180425.11 | 3.407076088 | 2.275756108 | 3.745648666 |
| ALDH6A1    | ENSG00000119711.12 | 2.549825703 | 3.372431673 | 3.573267643 |
| ZFHX3      | ENSG00000140836.15 | 4.080722616 | 3.10411499  | 3.299199045 |
| FHOD3      | ENSG00000134775.15 | 2.757220178 | 3.600567086 | 4.785137277 |
| SMPD2      | ENSG00000135587.8  | 3.53808587  | 4.842929158 | 4.980303777 |
| SEPT5      | ENSG00000184702.18 | 3.362672714 | 3.148105695 | 4.495160253 |
| ZNF529     | ENSG00000186020.12 | 3.011606817 | 3.343279298 | 3.532686102 |
| ACACB      | ENSG00000076555.15 | 2.358612181 | 3.17636061  | 2.876148519 |
| KIF9       | ENSG00000088727.12 | 4.30550286  | 3.311844098 | 3.985111719 |
| ZNF614     | ENSG00000142556.18 | 3.598920594 | 2.898223495 | 2.179816568 |
| PLEKHM1P1  | ENSG00000214176.9  | 2.785056396 | 3.295688124 | 3.979239237 |
| NT5DC3     | ENSG00000111696.11 | 3.630203727 | 4.093028464 | 2.3233701   |
| AL391422.3 | ENSG00000270504.1  | 2.181158266 | 3.071889776 | 3.276752161 |
| KHDRBS3    | ENSG00000131773.13 | 3.501539772 | 3.175027045 | 2.214741718 |
| IGFBP6     | ENSG00000167779.7  | 5.388201235 | 2.371579726 | 2.213062392 |
| AC011448.1 | ENSG00000258674.5  | 5.117469604 | 4.93315131  | 3.544612204 |
| NUBPL      | ENSG00000151413.16 | 2.98760038  | 3.114436487 | 3.832531317 |
| PAPD5      | ENSG00000121274.12 | 4.194066154 | 2.337372375 | 3.498299743 |
| RPGRIP1L   | ENSG00000103494.12 | 3.377370073 | 2.327627028 | 3.130803976 |
| BRSK1      | ENSG00000160469.16 | 4.454208519 | 3.454488168 | 4.009538732 |
| PRICKLE3   | ENSG00000012211.12 | 3.752014082 | 4.902872164 | 4.130411647 |
| KLHL11     | ENSG00000178502.5  | 3.338774527 | 3.143772465 | 3.659228903 |
| ERAP2      | ENSG00000164308.16 | 2.232916042 | 5.305633428 | 2.162237118 |
| STOML1     | ENSG00000067221.13 | 2.826559407 | 2.806762733 | 3.366952238 |
| SLC30A4    | ENSG00000104154.6  | 2.263078592 | 2.654321242 | 2.969831797 |

|            |                    |             |             |             |
|------------|--------------------|-------------|-------------|-------------|
| ZNF267     | ENSG00000185947.14 | 3.398395577 | 2.590347772 | 2.885115121 |
| NUDT17     | ENSG00000186364.11 | 3.047918671 | 3.564632787 | 2.310697296 |
| STK19      | ENSG00000204344.14 | 2.984800866 | 2.437245048 | 2.762301386 |
| FAM117A    | ENSG00000121104.7  | 2.158113459 | 4.231679745 | 4.004651047 |
| CCDC150    | ENSG00000144395.17 | 2.390757071 | 2.225708728 | 2.399504535 |
| RBM14-RBM4 | ENSG00000248643.5  | 2.967488232 | 2.66066525  | 3.871414829 |
| YAF2       | ENSG00000015153.14 | 4.163149969 | 3.534366554 | 2.310268518 |
| TICRR      | ENSG00000140534.13 | 4.25566944  | 2.88522139  | 2.260635329 |
| SP4        | ENSG00000105866.13 | 3.119754762 | 3.170111596 | 2.686589448 |
| MAGI1      | ENSG00000151276.23 | 3.483335971 | 3.865099018 | 3.73653628  |
| ABTB2      | ENSG00000166016.5  | 4.335224486 | 3.209432403 | 3.527013578 |
| LENG1      | ENSG00000105617.3  | 4.133045097 | 2.303614931 | 4.266208162 |
| LTB4R      | ENSG00000213903.8  | 2.971303739 | 2.646429673 | 2.67229292  |
| TUBB2B     | ENSG00000137285.9  | 2.477764578 | 5.379465575 | 4.829380667 |
| RAB43      | ENSG00000172780.16 | 2.743470469 | 3.087496864 | 2.99981606  |
| ZBTB11-AS1 | ENSG00000256628.3  | 3.358807213 | 3.02732804  | 2.224934626 |
| CHIC1      | ENSG00000204116.11 | 2.301111485 | 3.892182874 | 3.726016374 |
| ALOX12-AS1 | ENSG00000215067.9  | 2.783619452 | 2.842112526 | 2.443632101 |
| CELSR2     | ENSG00000143126.7  | 3.630252401 | 4.00406947  | 3.796270977 |
| CDC25C     | ENSG00000158402.18 | 4.327639845 | 2.296230975 | 2.872501327 |
| PEX12      | ENSG00000108733.9  | 3.92435122  | 2.935541969 | 3.798980958 |
| TAF4B      | ENSG00000141384.12 | 3.755239634 | 3.4957257   | 2.259555854 |
| TBX2-AS1   | ENSG00000267280.5  | 3.8135618   | 3.739946881 | 3.096779374 |
| DUBR       | ENSG00000243701.5  | 2.139492558 | 5.87610915  | 3.359538655 |
| ZBTB47     | ENSG00000114853.13 | 3.365671568 | 3.27082676  | 3.725192722 |
| BORCS5     | ENSG00000165714.10 | 3.092094087 | 3.756252532 | 4.790585044 |
| ANK2       | ENSG00000145362.17 | 3.0633187   | 3.286740361 | 4.939461516 |
| NBPF11     | ENSG00000263956.6  | 2.943269068 | 2.746121021 | 2.427138982 |
| FOXD3      | ENSG00000187140.5  | 3.961050747 | 2.757513106 | 2.274726148 |
| AP005202.1 | ENSG00000235552.4  | 5.191234416 | 3.911391613 | 3.29211406  |
| PLD6       | ENSG00000179598.5  | 2.646309196 | 2.616366199 | 3.123094323 |
| DLG4       | ENSG00000132535.18 | 5.323851301 | 4.059209662 | 3.240901831 |
| FBXO41     | ENSG00000163013.11 | 3.543597449 | 4.34635499  | 4.05655893  |
| CBX2       | ENSG00000173894.10 | 4.937003649 | 3.967321337 | 2.117099177 |
| TBC1D19    | ENSG00000109680.10 | 3.564510657 | 2.118769288 | 4.396841176 |
| FANCM      | ENSG00000187790.10 | 3.180721177 | 2.422655757 | 2.124081534 |
| HOXD-AS2   | ENSG00000237380.6  | 2.374359968 | 3.397947909 | 3.09992175  |
| LRIG2      | ENSG00000198799.11 | 2.901210117 | 2.97166598  | 2.432542525 |
| MSRA       | ENSG00000175806.14 | 3.77163043  | 2.21766373  | 4.522434524 |
| LINC01138  | ENSG00000274020.2  | 4.259717794 | 4.145725178 | 4.084073349 |
| SNORA63    | ENSG00000200418.1  | 3.858201757 | 4.060945711 | 2.991975774 |
| AC027307.2 | ENSG00000267317.2  | 2.6561787   | 2.648515022 | 3.748668006 |
| CASTOR2    | ENSG00000274070.1  | 2.954544049 | 2.489970818 | 2.362369235 |
| MARCH8     | ENSG00000165406.15 | 3.332794649 | 3.4350274   | 4.1211276   |
| APAF1      | ENSG00000120868.13 | 3.628479153 | 3.560677293 | 2.146486066 |
| IL27RA     | ENSG00000104998.3  | 5.241669841 | 4.857796015 | 2.744589062 |

|             |                    |             |             |             |
|-------------|--------------------|-------------|-------------|-------------|
| MRPS31P4    | ENSG00000250299.5  | 3.446669703 | 2.251793384 | 2.758833915 |
| RNF215      | ENSG00000099999.14 | 3.716849354 | 4.500831462 | 4.324455466 |
| ADGRA2      | ENSG00000020181.17 | 3.062185495 | 2.261278733 | 3.193573698 |
| ZFAT        | ENSG00000066827.15 | 3.385203458 | 2.753387536 | 2.221742965 |
| RETREG1     | ENSG00000154153.13 | 4.737540219 | 4.577381055 | 5.771144491 |
| FAR2        | ENSG00000064763.10 | 3.749871865 | 3.676220093 | 3.439028421 |
| ELL2        | ENSG00000118985.15 | 2.900258919 | 2.682443637 | 2.162653411 |
| PPIP5K1     | ENSG00000168781.21 | 2.572396191 | 3.399928215 | 4.010396331 |
| LANCL2      | ENSG00000132434.9  | 3.863316024 | 3.087190161 | 2.321525995 |
| ZNF669      | ENSG00000188295.14 | 3.671226152 | 2.277333496 | 2.540411461 |
| PMS2P4      | ENSG00000067601.7  | 3.648291379 | 3.874008191 | 3.803341519 |
| HOMER1      | ENSG00000152413.14 | 4.363806719 | 3.24374002  | 3.503152265 |
| AGAP6       | ENSG00000204149.10 | 3.276817819 | 3.186725412 | 2.871908183 |
| LYSMD4      | ENSG00000183060.15 | 2.679366516 | 3.42690607  | 2.77162045  |
| GRK4        | ENSG00000125388.19 | 3.462137817 | 2.294820017 | 4.022092824 |
| REEP6       | ENSG00000115255.10 | 2.379549759 | 3.610567561 | 2.32893868  |
| GPD1L       | ENSG00000152642.10 | 3.886866672 | 2.824878717 | 3.643991024 |
| AC132872.1  | ENSG00000260563.3  | 2.826632582 | 3.099437412 | 3.518618503 |
| PLEKHM3     | ENSG00000178385.14 | 2.350016375 | 3.035208169 | 2.787210132 |
| ZSCAN9      | ENSG00000137185.11 | 2.551926329 | 3.39766938  | 3.617820891 |
| SORBS1      | ENSG00000095637.21 | 2.943766684 | 5.827326069 | 4.654462783 |
| EFNB1       | ENSG00000090776.5  | 2.706825257 | 3.352558641 | 2.091644791 |
| SLC16A1-AS1 | ENSG00000226419.7  | 2.960798507 | 2.37768768  | 2.148448352 |
| ZNF549      | ENSG00000121406.8  | 2.773249552 | 2.184835326 | 3.33852076  |
| CCDC142     | ENSG00000135637.13 | 3.64164557  | 3.674178409 | 2.19087213  |
| SLC25A53    | ENSG00000269743.2  | 3.163976815 | 3.677586861 | 3.527351259 |
| DHRS4       | ENSG00000157326.18 | 3.298275855 | 3.480458533 | 2.245527062 |
| BACE1-AS    | ENSG00000278768.1  | 3.169401235 | 2.313059732 | 2.987587313 |
| MOB3C       | ENSG00000142961.14 | 3.157408509 | 2.748039155 | 2.374442747 |
| MANSC1      | ENSG00000111261.13 | 5.409445923 | 4.18618057  | 5.920423324 |
| LINC01003   | ENSG00000261455.1  | 3.661826778 | 3.072328239 | 2.223850568 |
| AC104662.3  | ENSG00000281501.1  | 2.756386138 | 2.63975862  | 3.998935754 |
| ZNF37BP     | ENSG00000234420.7  | 3.772315607 | 2.438253125 | 2.751771146 |
| EPB41L4A-AS | ENSG00000224032.6  | 3.907235133 | 2.561361594 | 3.676919389 |
| ST20        | ENSG00000180953.11 | 4.525018383 | 4.82762659  | 2.749085506 |
| ZNF100      | ENSG00000197020.10 | 4.177738661 | 2.673715533 | 2.200388761 |
| AC009779.2  | ENSG00000258056.2  | 3.202659312 | 3.813547971 | 2.114263482 |
| TSPAN15     | ENSG00000099282.9  | 2.212179304 | 2.744039824 | 2.514349872 |
| KLHL28      | ENSG00000179454.13 | 2.907523298 | 2.272676468 | 2.810461345 |
| USP27X      | ENSG00000273820.1  | 2.221824114 | 3.094191251 | 2.143336131 |
| GATS        | ENSG00000239521.7  | 3.324356602 | 2.654882804 | 3.288923541 |
| CDPF1       | ENSG00000205643.10 | 2.852364726 | 3.23047052  | 3.361608671 |
| SCAMP1-AS1  | ENSG00000245556.2  | 3.173169998 | 2.635102548 | 3.674477621 |
| DGKA        | ENSG00000065357.19 | 4.906649901 | 2.301560917 | 3.627092584 |
| GPRC5B      | ENSG00000167191.11 | 2.242931468 | 6.030782974 | 7.330086566 |
| HOXD8       | ENSG00000175879.8  | 2.398041289 | 4.108406999 | 5.15861118  |

|            |                    |             |             |             |
|------------|--------------------|-------------|-------------|-------------|
| C3orf52    | ENSG00000114529.12 | 2.420857874 | 2.95510848  | 3.134124306 |
| ZNF181     | ENSG00000197841.14 | 2.726720997 | 2.74938892  | 3.408585707 |
| BTBD9      | ENSG00000183826.16 | 2.612044156 | 2.957424586 | 3.703277122 |
| NEO1       | ENSG00000067141.16 | 2.145303352 | 4.896788023 | 4.64987375  |
| BCAR3      | ENSG00000137936.16 | 5.982103663 | 4.331301222 | 2.274934711 |
| SDC1       | ENSG00000115884.10 | 4.963939639 | 4.584285062 | 2.594649845 |
| ZNF441     | ENSG00000197044.10 | 2.962378694 | 2.348667237 | 3.893029519 |
| RC3H2      | ENSG00000056586.15 | 5.544040814 | 5.361323246 | 2.399874652 |
| ZNF227     | ENSG00000131115.15 | 4.694492004 | 2.44676874  | 3.063995971 |
| UST        | ENSG00000111962.7  | 2.980368706 | 3.259616393 | 4.009937921 |
| TTLL1      | ENSG00000100271.16 | 2.135773222 | 2.730047941 | 4.423589818 |
| BIN1       | ENSG00000136717.14 | 2.635723372 | 5.569407912 | 5.352896882 |
| ALMS1      | ENSG00000116127.17 | 3.779092356 | 3.141405081 | 2.25836012  |
| CPPED1     | ENSG00000103381.11 | 3.652998532 | 3.977595498 | 3.015279495 |
| BRMS1L     | ENSG00000100916.13 | 3.488118632 | 2.163668827 | 3.38035677  |
| RTL10      | ENSG00000215012.8  | 2.859651834 | 3.338787792 | 2.869199285 |
| FAIM       | ENSG00000158234.12 | 5.112831525 | 2.300561879 | 3.146017051 |
| SIAE       | ENSG00000110013.12 | 3.3630053   | 3.659820193 | 2.203432299 |
| KDM4C      | ENSG00000107077.18 | 5.025350419 | 2.874015437 | 3.548935488 |
| FZD7       | ENSG00000155760.2  | 5.380454048 | 5.510360628 | 6.836135671 |
| E2F2       | ENSG00000007968.6  | 3.63260896  | 2.250948713 | 2.292016986 |
| SAMD4A     | ENSG00000020577.13 | 2.130728715 | 3.769917401 | 4.386885423 |
| EIF3J-AS1  | ENSG00000179523.4  | 3.532019759 | 2.975915133 | 3.409790819 |
| NSUN6      | ENSG00000241058.3  | 4.079093039 | 2.507494998 | 3.372099481 |
| SLC12A6    | ENSG00000140199.11 | 3.542921753 | 3.615610369 | 5.345778215 |
| SLC25A27   | ENSG00000153291.15 | 2.247943136 | 3.919015866 | 4.401534088 |
| ZNF333     | ENSG00000160961.11 | 3.054503766 | 2.80765452  | 3.393822796 |
| BTRC       | ENSG00000166167.17 | 3.930397604 | 3.122956285 | 3.516387585 |
| ECE2       | ENSG00000145194.17 | 2.932286496 | 3.995983536 | 2.125950067 |
| ACP6       | ENSG00000162836.11 | 4.604099233 | 3.351242608 | 2.448830807 |
| ZNF20      | ENSG00000132010.15 | 3.118296955 | 2.612173525 | 2.632183996 |
| TRMT44     | ENSG00000155275.18 | 2.912393729 | 2.396456977 | 4.307161286 |
| GK         | ENSG00000198814.12 | 2.374869102 | 3.643328555 | 4.337721357 |
| HSD17B7    | ENSG00000132196.13 | 4.214426854 | 4.792081762 | 4.304165096 |
| CCNJ       | ENSG00000107443.15 | 4.143167795 | 2.986680159 | 3.613224404 |
| ZNF138     | ENSG00000197008.9  | 3.249727223 | 2.796269953 | 2.427291736 |
| SLC39A4    | ENSG00000147804.9  | 3.036300032 | 4.082319892 | 3.288494048 |
| LCOR       | ENSG00000196233.13 | 4.298745575 | 3.500148985 | 4.040804702 |
| SOCS3      | ENSG00000184557.4  | 4.628162307 | 7.384666535 | 4.074714108 |
| RABL2A     | ENSG00000144134.18 | 2.134536727 | 3.127412311 | 2.296023811 |
| WDR5B      | ENSG00000196981.3  | 3.698211567 | 3.662924908 | 3.006924342 |
| NMI        | ENSG00000123609.10 | 4.274176859 | 2.139617546 | 3.729615528 |
| ENO3       | ENSG00000108515.17 | 3.812770914 | 3.5430162   | 2.52997181  |
| ZBTB5      | ENSG00000168795.4  | 4.074116838 | 2.730278662 | 2.20435699  |
| AC018521.5 | ENSG00000264920.1  | 2.431310562 | 3.007218854 | 3.202665376 |
| ZNF175     | ENSG00000105497.7  | 2.60283561  | 2.389929622 | 2.642541305 |

|            |                    |             |             |             |
|------------|--------------------|-------------|-------------|-------------|
| FAM222A    | ENSG00000139438.5  | 4.047788938 | 3.503426455 | 4.169735805 |
| ZNF354B    | ENSG00000178338.10 | 3.378113045 | 2.19444387  | 2.986778155 |
| CLCN5      | ENSG00000171365.15 | 2.44714349  | 2.862041294 | 2.188009848 |
| ZSCAN20    | ENSG00000121903.14 | 2.279617206 | 2.711205106 | 2.081669622 |
| LINC00094  | ENSG00000235106.9  | 3.858271906 | 4.297130867 | 3.352224534 |
| DCUN1D3    | ENSG00000188215.9  | 3.143794494 | 2.790662224 | 2.534820213 |
| TP53       | ENSG00000141510.16 | 6.134078955 | 4.798138402 | 4.351399985 |
| DAG1       | ENSG00000173402.11 | 6.109326249 | 5.536445408 | 3.881579344 |
| HEMK1      | ENSG00000114735.9  | 2.81856586  | 4.333737048 | 3.370595874 |
| SYNE1      | ENSG00000131018.22 | 4.242851867 | 4.322673728 | 4.815341465 |
| TRPM4      | ENSG00000130529.15 | 3.704979807 | 4.846048486 | 3.075449594 |
| LIMD1      | ENSG00000144791.9  | 2.845320743 | 3.760988363 | 5.241627824 |
| ZNF611     | ENSG00000213020.9  | 3.249862118 | 3.548111094 | 3.765653993 |
| RGS5       | ENSG00000232995.7  | 2.736271681 | 2.526779215 | 2.196851203 |
| ATG2B      | ENSG00000066739.11 | 3.348591832 | 3.249206634 | 2.048649    |
| SESN3      | ENSG00000149212.11 | 3.093914788 | 3.42722892  | 5.225181874 |
| SLC45A4    | ENSG00000022567.9  | 3.222414223 | 3.700132148 | 4.054896941 |
| ARHGAP26   | ENSG00000145819.15 | 3.316599846 | 2.389200911 | 2.41957324  |
| RASAL2     | ENSG00000075391.16 | 4.763365423 | 4.022230774 | 2.312025846 |
| OSER1-AS1  | ENSG00000223891.5  | 2.527443575 | 2.863603791 | 4.063480085 |
| CDH19      | ENSG00000071991.8  | 5.397441574 | 5.324577796 | 3.628444391 |
| ZNF273     | ENSG00000198039.11 | 2.559982069 | 2.382822363 | 2.149770511 |
| PHACTR2    | ENSG00000112419.14 | 3.092822889 | 2.80874123  | 2.508075114 |
| ZNF8       | ENSG00000278129.1  | 2.843673218 | 2.627636193 | 2.448893088 |
| AC244154.1 | ENSG00000274487.1  | 3.289661393 | 3.063284688 | 3.195982571 |
| ZNF248     | ENSG00000198105.13 | 2.383852827 | 2.440822925 | 3.111392455 |
| RSBN1      | ENSG00000081019.13 | 3.716152542 | 2.627544394 | 2.959695027 |
| GSPT2      | ENSG00000189369.8  | 4.316329192 | 4.412983466 | 2.336030301 |
| HOXB9      | ENSG00000170689.9  | 5.150092623 | 3.722908247 | 5.648595071 |
| RUSC2      | ENSG00000198853.11 | 4.45437656  | 3.611699811 | 3.645663412 |
| TAF5       | ENSG00000148835.10 | 4.261805285 | 2.143916109 | 2.135469008 |
| TST        | ENSG00000128311.13 | 4.391758446 | 4.483073461 | 2.165532703 |
| CCDC102A   | ENSG00000135736.5  | 3.881296544 | 2.10323756  | 3.223438535 |
| C5orf24    | ENSG00000181904.8  | 3.343278132 | 3.115093299 | 3.234404121 |
| NBPF14     | ENSG00000270629.5  | 3.339760676 | 3.347732732 | 3.06008188  |
| C1orf56    | ENSG00000143443.9  | 3.642284612 | 3.726832458 | 2.038859123 |
| DNMBP      | ENSG00000107554.16 | 4.39308936  | 2.263982529 | 3.285661451 |
| TUBE1      | ENSG00000074935.13 | 4.809240892 | 3.942706464 | 4.152062335 |
| PLEKHF1    | ENSG00000166289.5  | 3.73029876  | 3.817048887 | 4.81893869  |
| ZNF808     | ENSG00000198482.11 | 2.507837972 | 3.39996336  | 3.544830709 |
| PPIC       | ENSG00000168938.5  | 5.877511679 | 5.11716964  | 4.947352865 |
| LINC00839  | ENSG00000185904.11 | 4.422075852 | 3.67226738  | 4.203150594 |
| SMG1P3     | ENSG00000180747.15 | 2.592879655 | 2.986430272 | 3.529813801 |
| TUFT1      | ENSG00000143367.15 | 4.14867847  | 3.490573835 | 2.822106495 |
| DCAF4      | ENSG00000119599.16 | 3.324743659 | 3.521210549 | 4.00142161  |
| PARPBP     | ENSG00000185480.11 | 5.290841463 | 4.049736538 | 2.344755306 |

|            |                    |             |             |             |
|------------|--------------------|-------------|-------------|-------------|
| TP53I3     | ENSG00000115129.13 | 5.125675715 | 4.101704923 | 2.094948361 |
| KIF7       | ENSG00000166813.14 | 3.424808327 | 3.844682352 | 4.18942713  |
| FBXO30     | ENSG00000118496.4  | 3.165045667 | 2.974143228 | 2.633073497 |
| FAM43A     | ENSG00000185112.5  | 2.64390012  | 3.88445559  | 2.049122855 |
| AL390728.6 | ENSG00000259865.1  | 3.361640789 | 3.012147525 | 3.106756752 |
| ZNF2       | ENSG00000275111.4  | 2.239057173 | 2.317900144 | 2.534982224 |
| RAB31      | ENSG00000168461.12 | 2.551407409 | 3.944043943 | 4.027500068 |
| CCNO       | ENSG00000152669.8  | 4.064467527 | 3.41238884  | 3.120410949 |
| LINC01881  | ENSG00000220804.8  | 2.515643784 | 3.341998201 | 4.256538436 |
| CBX7       | ENSG00000100307.12 | 2.662034527 | 3.616872107 | 4.052344627 |
| SCARNA9    | ENSG00000254911.3  | 2.258168996 | 2.158966953 | 5.085730896 |
| IQSEC2     | ENSG00000124313.13 | 3.56008794  | 3.683501309 | 3.390841169 |
| TTBK2      | ENSG00000128881.16 | 3.639709418 | 3.451272964 | 4.079964728 |
| IGFBP2     | ENSG00000115457.9  | 6.516141825 | 5.674726493 | 6.541227324 |
| SLC10A7    | ENSG00000120519.14 | 2.949538616 | 2.65075713  | 2.82022215  |
| NBEAL1     | ENSG00000144426.18 | 2.037590939 | 4.115234867 | 3.16414005  |
| ZNF688     | ENSG00000229809.8  | 2.387803414 | 2.546291301 | 2.285567524 |
| EXOC3-AS1  | ENSG00000221990.4  | 2.922843249 | 3.911150233 | 2.827375842 |
| GNG2       | ENSG00000186469.8  | 4.173757612 | 2.680135999 | 4.449071299 |
| POLQ       | ENSG00000051341.13 | 3.490890847 | 3.551934862 | 2.053148764 |
| AL391244.1 | ENSG00000224870.6  | 2.904319352 | 2.593401977 | 2.629680801 |
| TMEM159    | ENSG00000011638.10 | 2.171918701 | 4.7250264   | 4.102468777 |
| F3         | ENSG00000117525.13 | 1.993861163 | 2.737841114 | 2.427396186 |
| HYKK       | ENSG00000188266.13 | 2.4644502   | 2.777834425 | 2.714767763 |
| XYLB       | ENSG00000093217.9  | 5.118876348 | 4.569816719 | 2.115354286 |
| AL118506.1 | ENSG00000268858.2  | 2.346847397 | 3.187092369 | 3.691463127 |
| RFLNB      | ENSG00000183688.4  | 2.101709615 | 5.591841802 | 5.437538625 |
| LIN9       | ENSG00000183814.15 | 4.226630787 | 2.328406523 | 2.04587392  |
| SHPRH      | ENSG00000146414.15 | 3.117063169 | 2.168158392 | 2.428836572 |
| ABCA7      | ENSG00000064687.12 | 2.312113757 | 3.935506456 | 3.814476656 |
| CCDC40     | ENSG00000141519.14 | 3.330554205 | 2.927645568 | 2.498975699 |
| GIN51      | ENSG00000101003.9  | 5.777074697 | 4.898096439 | 2.278456884 |
| PTCH1      | ENSG00000185920.15 | 4.605275351 | 3.867676257 | 4.344836355 |
| MED26      | ENSG00000105085.10 | 3.838504296 | 3.943351151 | 2.944194957 |
| THNSL1     | ENSG00000185875.12 | 3.384434466 | 2.054309984 | 3.733426691 |
| SNX29      | ENSG00000048471.13 | 3.584322189 | 3.326305012 | 3.842264128 |
| SUOX       | ENSG00000139531.12 | 3.248970701 | 3.38780243  | 2.53875846  |
| IMMP2L     | ENSG00000184903.9  | 3.646159077 | 4.618913048 | 4.124613708 |
| ZNF771     | ENSG00000179965.11 | 3.263130286 | 3.122155895 | 3.29080124  |
| HACE1      | ENSG00000085382.11 | 2.515363251 | 2.808758137 | 3.013041867 |
| GJA3       | ENSG00000121743.3  | 3.296429094 | 4.027291975 | 4.430931998 |
| ABLIM3     | ENSG00000173210.19 | 3.564418424 | 2.248844533 | 4.149303829 |
| ZFP90      | ENSG00000184939.15 | 3.256734826 | 2.296707592 | 4.08209427  |
| PPARA      | ENSG00000186951.16 | 2.734377955 | 3.736256605 | 4.63116916  |
| C6orf226   | ENSG00000221821.3  | 2.383988261 | 2.387891292 | 4.035667726 |
| CCDC136    | ENSG00000128596.16 | 4.205104302 | 4.610408614 | 5.265817448 |

|            |                    |             |             |             |
|------------|--------------------|-------------|-------------|-------------|
| SLC35E3    | ENSG00000175782.9  | 3.117267837 | 3.209875861 | 2.236908355 |
| TYW5       | ENSG00000162971.10 | 2.320344222 | 3.436554489 | 2.704985358 |
| REXO5      | ENSG00000005189.19 | 3.652594826 | 2.217088854 | 2.120252146 |
| SCAPER     | ENSG00000140386.12 | 2.134574214 | 3.507568881 | 4.042676568 |
| TTLL3      | ENSG00000214021.15 | 2.743350967 | 3.212932932 | 2.530324669 |
| SCYL3      | ENSG00000000457.13 | 3.441609944 | 2.742794416 | 3.200404223 |
| PLCXD1     | ENSG00000182378.13 | 4.842281169 | 3.465232426 | 4.684185375 |
| SMOX       | ENSG00000088826.17 | 5.058564066 | 3.666159912 | 2.160554981 |
| KBTBD7     | ENSG00000120696.8  | 3.058375123 | 2.610625545 | 2.017273913 |
| GLIS2      | ENSG00000126603.8  | 2.177729476 | 2.385239197 | 3.550736155 |
| CDC37L1    | ENSG00000106993.11 | 4.562960204 | 2.573008731 | 2.493464056 |
| PPFIA3     | ENSG00000177380.13 | 4.594697053 | 6.252100614 | 2.113514322 |
| RAB40C     | ENSG00000197562.9  | 3.402554593 | 3.195083387 | 3.045672247 |
| HHAT       | ENSG00000054392.12 | 2.091954231 | 3.470981799 | 2.979564396 |
| SFXN5      | ENSG00000144040.12 | 4.254808947 | 3.831245468 | 2.072782797 |
| MZF1       | ENSG00000099326.8  | 4.666583901 | 3.932099226 | 3.176845073 |
| CCDC127    | ENSG00000164366.3  | 2.027619673 | 3.080539953 | 3.048547453 |
| PLEKHH1    | ENSG00000054690.13 | 3.66461284  | 4.896900014 | 4.764831737 |
| STPG1      | ENSG00000001460.17 | 4.144751281 | 3.497211136 | 3.64952035  |
| TFAP2C     | ENSG00000087510.6  | 7.258047345 | 4.779850893 | 5.094731296 |
| AFAP1      | ENSG00000196526.10 | 6.319648757 | 2.056045006 | 6.317762535 |
| RSG1       | ENSG00000132881.11 | 2.77552334  | 2.806301975 | 2.950017418 |
| AHRR       | ENSG00000063438.16 | 3.921214526 | 4.475852068 | 3.086507052 |
| ZNF776     | ENSG00000152443.12 | 3.591955557 | 2.124452211 | 3.533337384 |
| ZNF720     | ENSG00000197302.10 | 2.544857148 | 2.600600358 | 3.021715238 |
| TREX1      | ENSG00000213689.11 | 2.596401191 | 2.696488813 | 3.251846893 |
| AMOTL2     | ENSG00000114019.14 | 5.227497027 | 2.164068749 | 3.152985989 |
| DNAJC18    | ENSG00000170464.9  | 3.273135717 | 3.028911446 | 3.86744317  |
| TCTEX1D2   | ENSG00000213123.10 | 3.49238563  | 3.586672519 | 2.055654236 |
| ARRDC3     | ENSG00000113369.8  | 4.885960879 | 2.180831034 | 4.155125742 |
| EMC3-AS1   | ENSG00000180385.8  | 2.491814182 | 2.226199859 | 3.072890812 |
| MARK1      | ENSG00000116141.15 | 3.512377358 | 2.874123096 | 2.466484186 |
| PMAIP1     | ENSG00000141682.11 | 4.847290384 | 3.355503008 | 6.215384166 |
| HARBI1     | ENSG00000180423.4  | 3.373713793 | 3.609930604 | 3.763171277 |
| AC006333.2 | ENSG00000272686.1  | 2.085215848 | 2.540393037 | 2.941180725 |
| NUDT14     | ENSG00000183828.14 | 2.379262414 | 5.036825455 | 2.939857315 |
| AC023632.6 | ENSG00000280123.1  | 2.349566906 | 2.702045928 | 2.986678087 |
| ICAM3      | ENSG00000076662.9  | 2.986964131 | 2.673760029 | 2.085952025 |
| ZNF407     | ENSG00000215421.9  | 2.673970006 | 3.154279453 | 2.439666559 |
| ZNF625     | ENSG00000257591.5  | 3.385447275 | 3.350863097 | 2.798879825 |
| AL591895.1 | ENSG00000242861.1  | 2.783027827 | 2.209389012 | 2.624078659 |
| ULK4       | ENSG00000168038.10 | 3.622263021 | 3.49886355  | 2.575513881 |
| GDAP1      | ENSG00000104381.12 | 4.904100594 | 4.433359198 | 2.858353921 |
| CDH24      | ENSG00000139880.19 | 2.517319131 | 2.086032534 | 3.237025404 |
| ANKRD16    | ENSG00000134461.15 | 3.384253192 | 2.806121406 | 3.025870164 |
| SLC46A1    | ENSG00000076351.12 | 3.134887269 | 3.928088429 | 2.774811278 |

|            |                    |             |             |             |
|------------|--------------------|-------------|-------------|-------------|
| FAM104B    | ENSG00000182518.13 | 3.57437862  | 3.070854547 | 3.037269945 |
| FBXO8      | ENSG00000164117.13 | 2.025830741 | 2.907798609 | 3.625954002 |
| ARL4A      | ENSG00000122644.12 | 3.802901829 | 4.525070355 | 2.313708026 |
| RAD51-AS1  | ENSG00000245849.6  | 3.684379591 | 3.036573384 | 3.115388677 |
| PI4KAP1    | ENSG00000274602.4  | 2.107261593 | 2.796128861 | 3.490971674 |
| ZNF91      | ENSG00000167232.13 | 4.487367995 | 3.522389207 | 3.191949364 |
| CSAD       | ENSG00000139631.18 | 3.514037847 | 3.722498533 | 3.165942858 |
| ARHGAP33   | ENSG00000004777.18 | 2.77132376  | 2.49542483  | 2.95852257  |
| LMLN       | ENSG00000185621.11 | 2.09389557  | 2.816730239 | 2.286263522 |
| DUXAP10    | ENSG00000244306.10 | 3.706223716 | 2.16630775  | 3.060441866 |
| PRDM15     | ENSG00000141956.13 | 2.674031305 | 4.138870844 | 2.346537225 |
| CFAP44     | ENSG00000206530.10 | 2.278635416 | 2.808325375 | 2.334578174 |
| RRP7BP     | ENSG00000182841.12 | 3.086744337 | 3.173234151 | 2.144841202 |
| RNASEL     | ENSG00000135828.11 | 3.636168758 | 2.042288565 | 3.688924826 |
| ZNF518A    | ENSG00000177853.14 | 3.404628143 | 2.679970289 | 3.169706947 |
| JAG1       | ENSG00000101384.11 | 4.202164021 | 7.245272532 | 2.36650438  |
| C8orf44    | ENSG00000213865.7  | 2.810149792 | 2.681810936 | 2.153341077 |
| TMEM102    | ENSG00000181284.2  | 3.578066405 | 3.311449186 | 3.760793355 |
| CRYBG3     | ENSG00000080200.9  | 3.21977898  | 4.158528538 | 3.617481608 |
| ORAI3      | ENSG00000175938.6  | 3.375856613 | 3.567222388 | 4.082100675 |
| LSM11      | ENSG00000155858.5  | 3.297866584 | 1.954999276 | 2.103533927 |
| BTN3A1     | ENSG00000026950.16 | 2.304241448 | 3.384932627 | 3.385412574 |
| ARL15      | ENSG00000185305.10 | 4.756407849 | 3.839585112 | 4.242407922 |
| IFIT2      | ENSG00000119922.9  | 3.165104679 | 1.976412796 | 2.502652646 |
| SCARF2     | ENSG00000244486.8  | 2.067272233 | 4.84705695  | 5.307001611 |
| Z98749.2   | ENSG00000244627.5  | 2.602449045 | 2.919710878 | 3.272296898 |
| GTF2IP20   | ENSG00000272645.3  | 2.998842828 | 2.51146187  | 3.0592764   |
| C11orf63   | ENSG00000109944.10 | 2.657102647 | 2.550910107 | 3.441417494 |
| SEMA4B     | ENSG00000185033.14 | 2.884235062 | 2.552746405 | 2.457247245 |
| EVA1A      | ENSG00000115363.13 | 2.026913264 | 5.231364451 | 5.943070103 |
| SEMA3A     | ENSG00000075213.10 | 4.221703423 | 1.987516527 | 2.129005224 |
| AC138393.1 | ENSG00000185495.10 | 2.910044003 | 2.536710894 | 2.68249485  |
| DLX2       | ENSG00000115844.10 | 4.139926757 | 2.078140453 | 6.22388134  |
| LINC00665  | ENSG00000232677.6  | 5.889290915 | 4.257303373 | 3.848401737 |
| FSTL3      | ENSG00000070404.9  | 3.436482727 | 3.945738257 | 2.133987042 |
| TSPYL4     | ENSG00000187189.10 | 3.905839394 | 3.12745902  | 3.282902226 |
| NXPH4      | ENSG00000182379.9  | 1.95002611  | 2.1634006   | 3.884379904 |
| CEP162     | ENSG00000135315.11 | 2.209224219 | 2.880172225 | 2.498960794 |
| ZNF74      | ENSG00000185252.18 | 2.498088122 | 2.630818547 | 3.396711579 |
| TMCC2      | ENSG00000133069.15 | 2.504507438 | 4.369821922 | 6.940144517 |
| EMP1       | ENSG00000134531.9  | 6.779823944 | 6.428014906 | 3.974210441 |
| CCDC61     | ENSG00000104983.8  | 3.07649777  | 2.549773561 | 3.85597672  |
| AC007969.1 | ENSG00000233762.3  | 2.646680969 | 2.53477912  | 2.582289267 |
| KMT2E-AS1  | ENSG00000239569.3  | 2.175279777 | 2.865257997 | 2.231640921 |
| DPY19L2P2  | ENSG00000170629.14 | 2.893565943 | 3.715463723 | 2.895122553 |
| MINDY2     | ENSG00000128923.10 | 3.631792483 | 4.783253935 | 4.284871274 |



|            |                    |             |             |             |
|------------|--------------------|-------------|-------------|-------------|
| STEAP3     | ENSG00000115107.19 | 2.141640073 | 3.820922025 | 2.129903221 |
| SRP14-AS1  | ENSG00000248508.6  | 2.630125219 | 3.556017731 | 3.345713913 |
| AC110079.1 | ENSG00000260404.3  | 2.064858702 | 3.102072503 | 2.404614136 |
| CACNB1     | ENSG00000067191.15 | 2.53434992  | 2.995286764 | 3.47495564  |
| SYT11      | ENSG00000132718.8  | 5.195762467 | 5.561449305 | 5.242516731 |
| LINC02210  | ENSG00000204650.14 | 3.269738894 | 3.891346078 | 5.848310152 |
| SUCLG2-AS1 | ENSG00000241316.6  | 2.523668909 | 3.826206906 | 2.146582705 |
| MFSD9      | ENSG00000135953.10 | 2.097655204 | 3.99671518  | 3.43663238  |
| ADAM19     | ENSG00000135074.15 | 3.899919994 | 2.207366744 | 4.167616975 |
| IPMK       | ENSG00000151151.5  | 2.649965471 | 2.539210743 | 3.734868492 |
| OGFRL1     | ENSG00000119900.7  | 2.918563927 | 3.34990222  | 2.151637815 |
| PRR34-AS1  | ENSG00000241990.5  | 4.110052787 | 4.593160456 | 4.270640419 |
| POLR3B     | ENSG00000013503.9  | 4.772459935 | 3.328502118 | 1.991307101 |
| SBF2-AS1   | ENSG00000246273.6  | 3.641554316 | 3.319447847 | 3.352373772 |
| CACFD1     | ENSG00000160325.14 | 2.307528918 | 2.527824642 | 2.590984265 |
| ZNF726     | ENSG00000213967.10 | 3.706665952 | 2.161271864 | 1.973994849 |
| DOK4       | ENSG00000125170.10 | 4.242653979 | 2.929300827 | 3.239683028 |
| NDRG2      | ENSG00000165795.23 | 3.91276426  | 3.546810317 | 4.610616766 |
| TMEM79     | ENSG00000163472.18 | 2.746358255 | 2.747187581 | 2.167558982 |
| BCHE       | ENSG00000114200.9  | 3.540009935 | 1.999460925 | 5.781750582 |
| AC103691.1 | ENSG00000274383.1  | 2.258319105 | 4.33187244  | 3.20552418  |
| KIAA0895   | ENSG00000164542.12 | 3.025573882 | 3.179122345 | 2.885815217 |
| SERAC1     | ENSG00000122335.13 | 2.447122399 | 2.049013787 | 2.199969467 |
| AL109918.1 | ENSG00000216775.2  | 4.007356228 | 2.097137643 | 3.653998225 |
| MAP3K14    | ENSG00000006062.14 | 3.475836809 | 2.311764951 | 4.195199075 |
| IGFLR1     | ENSG00000126246.9  | 3.128826079 | 2.693323426 | 2.778719988 |
| FBXO6      | ENSG00000116663.10 | 3.171535966 | 2.560112029 | 4.238540038 |
| TLCD1      | ENSG00000160606.10 | 3.773723466 | 3.901113058 | 3.156588318 |
| LINC00680  | ENSG00000215190.9  | 3.043841981 | 3.016627536 | 2.503126069 |
| AC006453.2 | ENSG00000283196.1  | 2.045588949 | 3.529908034 | 2.270256042 |
| FSTL1      | ENSG00000163430.11 | 1.972902463 | 5.898231833 | 4.047511054 |
| TMEM17     | ENSG00000186889.9  | 3.099175283 | 3.651083812 | 3.565148409 |
| AC018645.3 | ENSG00000281332.1  | 3.103540929 | 2.329080466 | 2.054600988 |
| ZNF79      | ENSG00000196152.10 | 2.681505278 | 3.942339575 | 2.486417996 |
| MTMR11     | ENSG00000014914.20 | 2.443299009 | 2.347598552 | 3.057305079 |
| NOMO3      | ENSG00000103226.17 | 3.49349229  | 2.035946882 | 2.590316782 |
| EAF2       | ENSG00000145088.8  | 2.526846093 | 2.81238964  | 2.17887208  |
| NEIL3      | ENSG00000109674.3  | 3.994235621 | 2.240674381 | 1.902588158 |
| TP53TG1    | ENSG00000182165.17 | 2.967004878 | 3.855509207 | 4.422858636 |
| TRIM66     | ENSG00000166436.15 | 2.367120746 | 3.039205884 | 2.623910247 |
| PPP1R12B   | ENSG00000077157.21 | 2.771384931 | 2.205198455 | 2.455350467 |
| CTPS2      | ENSG00000047230.14 | 4.330369845 | 3.393170442 | 4.39467498  |
| SNX15      | ENSG00000110025.12 | 3.833980731 | 2.913466407 | 3.838632453 |
| PPARGC1B   | ENSG00000155846.16 | 2.312977069 | 2.7324279   | 2.174598848 |
| ZNF708     | ENSG00000182141.10 | 3.275529712 | 2.801901672 | 2.635806762 |
| ZNF519     | ENSG00000175322.11 | 2.424876614 | 2.839222248 | 1.993204014 |

|             |                    |             |             |             |
|-------------|--------------------|-------------|-------------|-------------|
| KYAT1       | ENSG00000171097.13 | 3.785185979 | 4.052307567 | 1.937187143 |
| LINC00265   | ENSG00000188185.11 | 2.590140772 | 3.777388711 | 2.69134282  |
| HSPA12A     | ENSG00000165868.13 | 3.464433908 | 4.141596065 | 3.507500354 |
| PRR7-AS1    | ENSG00000246334.2  | 5.88357349  | 2.857367431 | 2.310338605 |
| GS1-124K5.4 | ENSG00000237310.1  | 2.886565974 | 3.290080293 | 3.1742282   |
| A1BG-AS1    | ENSG00000268895.5  | 3.181438214 | 3.291508058 | 2.32821011  |
| TRAPPC5     | ENSG00000181029.8  | 3.895475707 | 3.206448194 | 2.783892685 |
| CTIF        | ENSG00000134030.13 | 3.333596485 | 3.96872059  | 2.870125622 |
| SEPSECS     | ENSG00000109618.11 | 3.981601329 | 2.38272568  | 3.871254077 |
| TIFA        | ENSG00000145365.10 | 3.156079779 | 2.293313477 | 3.089950493 |
| MCM9        | ENSG00000111877.17 | 3.232499062 | 2.01390958  | 2.558368481 |
| ZNF599      | ENSG00000153896.17 | 2.59051375  | 2.603368981 | 2.420805734 |
| SMIM3       | ENSG00000256235.1  | 2.439276527 | 2.186834316 | 8.329764414 |
| ATP5S       | ENSG00000125375.14 | 3.039268813 | 2.091438923 | 3.117490708 |
| DLC1        | ENSG00000164741.14 | 3.798103199 | 1.888741534 | 6.879460459 |
| PELI3       | ENSG00000174516.14 | 3.754517803 | 3.808411175 | 3.321471884 |
| FOXC1       | ENSG00000054598.6  | 4.572447942 | 1.911908772 | 3.328817388 |
| TMEM242     | ENSG00000215712.10 | 2.934264066 | 2.752149062 | 2.764535714 |
| NUDT6       | ENSG00000170917.13 | 2.867291862 | 3.020955117 | 2.340986984 |
| CCDC186     | ENSG00000165813.18 | 3.356314873 | 3.392009925 | 3.842164503 |
| USP35       | ENSG00000118369.12 | 1.920538296 | 3.849686723 | 3.022100863 |
| STX7        | ENSG00000079950.13 | 2.018397428 | 4.611841301 | 5.598736034 |
| DDX60       | ENSG00000137628.16 | 1.923066534 | 2.047290494 | 2.983853789 |
| MXD3        | ENSG00000213347.10 | 3.317028331 | 2.127840602 | 2.213490733 |
| RILPL2      | ENSG00000150977.10 | 3.695453992 | 2.567420772 | 4.02463638  |
| N6AMT1      | ENSG00000156239.11 | 2.543994218 | 1.989403039 | 3.703881783 |
| DOK1        | ENSG00000115325.13 | 4.307083277 | 2.4432743   | 2.048924068 |
| RAVER2      | ENSG00000162437.14 | 4.016678082 | 4.29794614  | 4.695995646 |
| MSC-AS1     | ENSG00000235531.9  | 2.051634807 | 3.708710041 | 5.595028501 |
| MTRFR2      | ENSG00000146410.11 | 3.636115944 | 3.255905265 | 2.114452253 |
| NREP        | ENSG00000134986.13 | 5.922715517 | 3.018140903 | 3.863025535 |
| THEMIS2     | ENSG00000130775.15 | 2.208640153 | 5.656703223 | 2.678542189 |
| AC116533.1  | ENSG00000244398.1  | 3.816474716 | 2.609437005 | 2.57903315  |
| AL162258.1  | ENSG00000271853.5  | 4.299189894 | 4.959491444 | 1.996056285 |
| NAV2        | ENSG00000166833.19 | 1.898099454 | 7.896714707 | 6.630212842 |
| AC115618.3  | ENSG00000279528.1  | 3.240169782 | 2.820687856 | 2.272574395 |
| IRX3        | ENSG00000177508.11 | 3.994257768 | 4.019109022 | 4.562666099 |
| MIR4292     | ENSG00000265806.1  | 2.908932546 | 2.557694472 | 3.67382387  |
| ZCCHC7      | ENSG00000147905.17 | 4.850068113 | 4.456864659 | 3.565928638 |
| AC091390.4  | ENSG00000239969.5  | 3.336965315 | 3.647419598 | 3.05448144  |
| PDIK1L      | ENSG00000175087.9  | 3.795800681 | 2.506249039 | 2.825670878 |
| FBXL17      | ENSG00000145743.15 | 4.442237927 | 3.344451578 | 4.863546043 |
| FER         | ENSG00000151422.12 | 3.49767735  | 3.124188655 | 3.13380639  |
| ZNF490      | ENSG00000188033.9  | 3.944605558 | 2.745089093 | 3.159077869 |
| NEURL2      | ENSG00000124257.6  | 2.004949532 | 2.334848469 | 2.433270048 |
| SPACA9      | ENSG00000165698.15 | 2.94367158  | 3.056325965 | 1.930633198 |

|            |                    |             |             |             |
|------------|--------------------|-------------|-------------|-------------|
| SLC22A5    | ENSG00000197375.12 | 2.793783312 | 2.03721454  | 3.264278917 |
| SLC25A42   | ENSG00000181035.13 | 2.995432104 | 2.788342459 | 2.504595767 |
| LINC00467  | ENSG00000153363.12 | 3.042161084 | 2.0729132   | 1.978165624 |
| SLX4IP     | ENSG00000149346.14 | 2.913889814 | 2.04307635  | 2.316742443 |
| ALCAM      | ENSG00000170017.12 | 4.187552718 | 4.398091565 | 5.936996917 |
| NOD1       | ENSG00000106100.10 | 3.043962439 | 3.161389454 | 2.064376151 |
| ERCC6L     | ENSG00000186871.6  | 4.355538761 | 3.415750231 | 1.888738915 |
| FAM217B    | ENSG00000196227.10 | 2.288138751 | 2.547474628 | 2.799063263 |
| AC015813.6 | ENSG00000279207.1  | 2.512057763 | 1.869132438 | 2.813820058 |
| KLF11      | ENSG00000172059.10 | 2.623695368 | 3.327534806 | 2.12137452  |
| STARD13    | ENSG00000133121.20 | 4.630879036 | 2.167892069 | 3.36279845  |
| RTEL1      | ENSG00000258366.7  | 3.870376505 | 2.004319586 | 3.757584883 |
| SNORD4A    | ENSG00000238578.1  | 4.234994154 | 3.688560312 | 2.6808531   |
| MTERF2     | ENSG00000120832.9  | 3.024678924 | 2.911447147 | 2.287846688 |
| NRSN2-AS1  | ENSG00000225377.5  | 2.466093585 | 2.764951276 | 2.042364472 |
| ASRGL1     | ENSG00000162174.12 | 3.270794718 | 4.248642746 | 2.574026816 |
| STAG3L1    | ENSG00000205583.13 | 2.764805156 | 2.771723556 | 2.199665835 |
| ARMC5      | ENSG00000140691.16 | 3.096570079 | 2.274243428 | 2.931367587 |
| LRRC1      | ENSG00000137269.14 | 3.355797194 | 2.854833141 | 3.881421991 |
| FTH1P2     | ENSG00000234975.6  | 2.327306431 | 2.172109057 | 2.347399043 |
| GEM        | ENSG00000164949.7  | 3.83834119  | 4.627789733 | 1.908582093 |
| CBWD6      | ENSG00000215126.10 | 3.217347478 | 3.600642998 | 2.787246721 |
| CYP2R1     | ENSG00000186104.10 | 2.308559388 | 3.42045065  | 4.821655559 |
| FAM216A    | ENSG00000204856.11 | 5.338763929 | 3.255702999 | 1.888559872 |
| CACHD1     | ENSG00000158966.13 | 2.762390252 | 4.39194931  | 4.946375343 |
| MORN4      | ENSG00000171160.17 | 3.702343553 | 2.45946388  | 4.597627983 |
| ZSCAN5A    | ENSG00000131848.9  | 4.044048985 | 2.339174531 | 2.999911838 |
| APOL6      | ENSG00000221963.5  | 3.440042475 | 1.840872926 | 3.373955793 |
| ZNF180     | ENSG00000167384.10 | 3.197354526 | 2.010898135 | 2.393697565 |
| RELB       | ENSG00000104856.13 | 3.695248792 | 1.964649311 | 4.09098906  |
| NEMP2      | ENSG00000189362.11 | 2.142156448 | 2.190534976 | 3.116354744 |
| ANKRD37    | ENSG00000186352.8  | 3.515682551 | 3.478041407 | 2.666268654 |
| TPST2      | ENSG00000128294.15 | 2.023735196 | 3.948304714 | 2.649877851 |
| CEP85L     | ENSG00000111860.13 | 3.40782397  | 2.801358241 | 2.778599395 |
| ARHGAP42   | ENSG00000165895.17 | 2.098866218 | 3.359003784 | 4.920599498 |
| FAS        | ENSG00000026103.21 | 3.275147858 | 3.127949783 | 3.808092159 |
| FAM86C1    | ENSG00000158483.15 | 3.77861358  | 3.560189657 | 2.275335614 |
| DUSP28     | ENSG00000188542.9  | 2.019808108 | 2.283541978 | 2.315025642 |
| IFIT1      | ENSG00000185745.9  | 3.699662021 | 2.264152507 | 2.93807148  |
| LINC01291  | ENSG00000204792.2  | 5.582193727 | 2.049479232 | 2.520007708 |
| DLGAP1-AS1 | ENSG00000177337.7  | 3.638094664 | 4.272183723 | 2.754668931 |
| EPB41L5    | ENSG00000115109.13 | 2.205380738 | 4.322266909 | 4.082512718 |
| BRCA2      | ENSG00000139618.14 | 3.178470838 | 2.793707027 | 1.838836678 |
| PREX1      | ENSG00000124126.13 | 5.494920024 | 4.11585813  | 4.388590062 |
| SNRK       | ENSG00000163788.13 | 2.357847069 | 2.921012343 | 2.470799131 |
| AC060780.1 | ENSG00000267002.2  | 3.793887667 | 3.138017282 | 4.059891793 |

|            |                    |             |             |             |
|------------|--------------------|-------------|-------------|-------------|
| AGO3       | ENSG00000126070.19 | 3.445235069 | 2.420700401 | 3.125948363 |
| TGIF2      | ENSG00000118707.9  | 3.211596745 | 2.81146094  | 2.870887351 |
| NMRK1      | ENSG00000106733.20 | 1.876020005 | 3.862413506 | 2.547647876 |
| SWT1       | ENSG00000116668.12 | 2.371495884 | 2.640191981 | 2.301844369 |
| PAXIP1-AS2 | ENSG00000214106.7  | 2.09718647  | 1.973784342 | 2.656509017 |
| KIAA1671   | ENSG00000197077.13 | 1.817284243 | 3.588082145 | 2.835812966 |
| SAMD10     | ENSG00000130590.13 | 1.985315486 | 2.790346098 | 3.302267647 |
| KATNAL2    | ENSG00000167216.16 | 2.003317485 | 3.144621366 | 2.205969132 |
| C16orf45   | ENSG00000166780.10 | 4.796991368 | 3.848907808 | 4.121927423 |
| TRMT10A    | ENSG00000145331.13 | 3.187349232 | 1.919405452 | 1.831228589 |
| FZD3       | ENSG00000104290.10 | 1.928799084 | 2.843407444 | 1.910986763 |
| XIAP       | ENSG00000101966.12 | 3.286694819 | 3.701740269 | 3.184639448 |
| ZBED5-AS1  | ENSG00000247271.6  | 1.904814615 | 3.713808756 | 4.135588144 |
| ANTXR2     | ENSG00000163297.16 | 2.970998635 | 1.993623692 | 3.094848223 |
| ARHGAP5-AS | ENSG00000258655.2  | 4.080909979 | 2.994674583 | 1.983386069 |
| HAPLN3     | ENSG00000140511.11 | 4.334468854 | 3.26044268  | 3.063657706 |
| HOXC8      | ENSG00000037965.5  | 3.974141802 | 3.788029075 | 2.115956    |
| B3GNTL1    | ENSG00000175711.8  | 4.1015598   | 2.048626309 | 3.255079577 |
| SLC16A3    | ENSG00000141526.16 | 1.800830351 | 3.655948734 | 3.84379466  |
| AP5S1      | ENSG00000125843.10 | 2.568293076 | 2.55115898  | 2.204235248 |
| ZNF101     | ENSG00000181896.11 | 3.637572629 | 3.532620142 | 2.304946512 |
| TMEM198    | ENSG00000188760.10 | 2.424661923 | 3.607669777 | 2.168550218 |
| AL035071.1 | ENSG00000260257.2  | 2.13206996  | 2.58279134  | 2.185722455 |
| MSX2       | ENSG00000120149.8  | 3.298262474 | 1.816052139 | 4.75669717  |
| AC092747.4 | ENSG00000275764.1  | 2.468861338 | 1.828093244 | 2.230060693 |
| P2RY11     | ENSG00000244165.1  | 5.059150876 | 3.227498745 | 2.907630145 |
| AHI1       | ENSG00000135541.20 | 3.747214894 | 3.365888763 | 3.541841702 |
| CIPC       | ENSG00000198894.7  | 1.845305076 | 3.085989963 | 4.606142915 |
| CNNM2      | ENSG00000148842.17 | 3.291878988 | 3.000678644 | 2.642696679 |
| TMEM81     | ENSG00000174529.7  | 2.69674023  | 1.918229265 | 2.183604642 |
| ZNF670     | ENSG00000277462.1  | 4.203614212 | 1.825878711 | 2.494327437 |
| ZNF552     | ENSG00000178935.5  | 3.139473082 | 2.608926553 | 3.035266846 |
| ZNF449     | ENSG00000173275.12 | 1.922019611 | 2.915193154 | 2.91350491  |
| TOR2A      | ENSG00000160404.17 | 3.100018745 | 3.142612231 | 1.871426068 |
| MICB       | ENSG00000204516.9  | 3.81747981  | 4.876378096 | 2.92578478  |
| MT-TS2     | ENSG00000210184.1  | 1.907094163 | 3.499712528 | 2.484696984 |
| ZNF107     | ENSG00000196247.11 | 2.652051259 | 3.176437364 | 2.506352657 |
| CELSR3     | ENSG00000008300.16 | 3.060933154 | 1.956654066 | 2.053604239 |
| CTXN1      | ENSG00000178531.5  | 5.078998525 | 3.389679343 | 1.835266463 |
| KIF15      | ENSG00000163808.16 | 4.884467959 | 3.122568588 | 1.872230392 |
| AC012306.2 | ENSG00000272667.1  | 2.705784583 | 2.86830439  | 2.481355907 |
| EIF4HP1    | ENSG00000233830.2  | 1.912032734 | 2.32920611  | 1.835474579 |
| RILPL1     | ENSG00000188026.12 | 2.845250626 | 3.175344345 | 4.722704726 |
| ARHGEF19   | ENSG00000142632.16 | 3.89178016  | 2.783829321 | 3.086203926 |
| MIR25      | ENSG00000207547.1  | 2.889022695 | 3.055317713 | 2.041214891 |
| GNB1L      | ENSG00000185838.13 | 2.169033179 | 2.040368433 | 3.079858518 |

|             |                    |             |             |             |
|-------------|--------------------|-------------|-------------|-------------|
| TMEM8B      | ENSG00000137103.17 | 2.536374019 | 2.750439079 | 4.003487923 |
| BCL2L11     | ENSG00000153094.22 | 3.023970654 | 3.007508184 | 3.432018842 |
| AC138932.1  | ENSG00000183458.13 | 2.340494473 | 2.174217972 | 3.905205209 |
| MATR3       | ENSG00000280987.4  | 5.673691514 | 3.140976651 | 5.464556745 |
| SPIN4       | ENSG00000186767.6  | 3.408348874 | 2.493434982 | 2.188191375 |
| MKLN1-AS    | ENSG00000236753.5  | 2.361333593 | 3.65986316  | 3.302541611 |
| AC109460.3  | ENSG00000261067.7  | 2.187461362 | 2.981924251 | 2.388920328 |
| RPL21P16    | ENSG00000220842.6  | 3.521677805 | 2.27940648  | 2.165196383 |
| NRIP3       | ENSG00000175352.10 | 1.993495901 | 5.801565384 | 6.298857262 |
| ADGRB2      | ENSG00000121753.12 | 3.202282214 | 1.975905543 | 2.770038294 |
| C20orf196   | ENSG00000171984.14 | 3.316317217 | 2.516775018 | 1.85036473  |
| HASPIN      | ENSG00000177602.5  | 4.61783719  | 2.953519509 | 1.85490215  |
| GIN1        | ENSG00000145723.16 | 2.539442277 | 2.098834103 | 2.683044939 |
| CLIP3       | ENSG00000105270.14 | 4.813098707 | 5.009099622 | 5.811502143 |
| ZNF14       | ENSG00000105708.8  | 2.843368716 | 2.479361758 | 2.353304312 |
| AP001324.1  | ENSG00000227615.1  | 3.422776531 | 2.255667681 | 2.090772983 |
| ATP6V1B1-AS | ENSG00000239322.1  | 3.46269487  | 3.897604486 | 1.814209097 |
| ZNF112      | ENSG00000062370.16 | 2.705502702 | 1.732422625 | 2.792279215 |
| TRAPPC9     | ENSG00000167632.14 | 3.739139907 | 3.115092509 | 4.741550199 |
| MAPK8IP1    | ENSG00000121653.11 | 4.534599573 | 4.110161174 | 4.375592261 |
| HOXA1       | ENSG00000105991.7  | 2.807704478 | 4.106719117 | 3.531698139 |
| TIGD5       | ENSG00000179886.5  | 3.055598903 | 2.54696668  | 1.911941563 |
| MAGI3       | ENSG00000081026.18 | 2.672078476 | 2.403333614 | 3.114617261 |
| CRY2        | ENSG00000121671.11 | 2.168777281 | 3.543539934 | 3.529155954 |
| FGFR1OP     | ENSG00000213066.11 | 3.175840103 | 2.601973635 | 2.496326686 |
| VAMP1       | ENSG00000139190.16 | 2.571349031 | 1.719770485 | 2.342882304 |
| CLEC11A     | ENSG00000105472.12 | 1.844101071 | 1.917867282 | 8.03732527  |
| RFXAP       | ENSG00000133111.3  | 3.547742013 | 2.315731185 | 2.212997825 |
| VN1R81P     | ENSG00000268357.1  | 2.298805144 | 2.05744261  | 2.361074277 |
| AC144652.1  | ENSG00000273117.1  | 2.063301304 | 2.735189273 | 1.868194453 |
| FAM117B     | ENSG00000138439.11 | 3.347475856 | 3.269349966 | 2.482866178 |
| NFIB        | ENSG00000147862.15 | 5.144047014 | 2.089279198 | 3.30194435  |
| ZNF71       | ENSG00000197951.8  | 1.994600337 | 2.441562398 | 1.95462933  |
| PLCD1       | ENSG00000187091.13 | 2.717974206 | 3.407510245 | 2.818399914 |
| TRAPPC6A    | ENSG00000007255.10 | 1.875779462 | 3.917790608 | 4.424847731 |
| HCFC2       | ENSG00000111727.11 | 3.287716145 | 1.799153929 | 2.582118046 |
| ADCK1       | ENSG00000063761.15 | 2.052621167 | 2.036703258 | 2.537988303 |
| SGCD        | ENSG00000170624.13 | 1.829784524 | 3.969315511 | 5.010696598 |
| ZNF33A      | ENSG00000189180.15 | 3.461269338 | 1.84568529  | 3.07250474  |
| ZNF791      | ENSG00000173875.13 | 3.454156598 | 2.237868731 | 2.7422943   |
| ID2         | ENSG00000115738.9  | 2.205326141 | 2.260737317 | 3.285688563 |
| SH2B2       | ENSG00000160999.10 | 2.584927607 | 3.271460909 | 2.357846553 |
| ZNF543      | ENSG00000178229.7  | 2.509760282 | 1.752810507 | 3.022541282 |
| LCMT2       | ENSG00000168806.7  | 3.899430791 | 3.07972612  | 1.889608547 |
| E2F8        | ENSG00000129173.12 | 3.184605443 | 2.146773909 | 1.803884424 |
| SHC4        | ENSG00000185634.11 | 3.567778465 | 4.453289799 | 3.96000091  |

|            |                    |             |             |             |
|------------|--------------------|-------------|-------------|-------------|
| ZNF286A    | ENSG00000187607.15 | 4.25047873  | 2.751326444 | 2.252781448 |
| NBPF12     | ENSG00000268043.7  | 2.222891229 | 2.135084865 | 2.152477746 |
| AC022415.1 | ENSG00000242615.1  | 2.914774384 | 2.96331224  | 2.678447543 |
| TRIM34     | ENSG00000258659.6  | 1.860606119 | 3.214568464 | 4.082921126 |
| AC126474.2 | ENSG00000280088.1  | 2.12440518  | 2.172596196 | 1.974731362 |
| DHFR2      | ENSG00000178700.7  | 2.847600736 | 3.053548204 | 4.040979653 |
| ZBTB9      | ENSG00000213588.5  | 2.706133307 | 3.120495475 | 2.744945748 |
| MAMDC4     | ENSG00000177943.13 | 2.25760034  | 3.028321942 | 4.191068618 |
| HIVEP1     | ENSG00000095951.16 | 2.523910232 | 2.304224335 | 2.296254478 |
| MDP1       | ENSG00000213920.8  | 2.730478793 | 2.020024358 | 3.540791445 |
| HLA-DMA    | ENSG00000204257.14 | 6.268225705 | 2.999260199 | 1.903808857 |
| NUDT8      | ENSG00000167799.9  | 2.702523263 | 3.38262233  | 2.074125811 |
| DNAJC12    | ENSG00000108176.14 | 4.027883102 | 3.957553692 | 2.478651383 |
| APH1B      | ENSG00000138613.13 | 1.880405943 | 4.283100102 | 3.579742819 |
| PHACTR1    | ENSG00000112137.17 | 1.757463962 | 5.784618499 | 5.637734102 |
| BICRAL     | ENSG00000112624.12 | 2.898195049 | 3.178868437 | 3.116189858 |
| RNPS1P1    | ENSG00000250896.1  | 3.447393076 | 1.970709983 | 2.428968957 |
| AC016876.2 | ENSG00000264772.6  | 3.292318847 | 2.866183685 | 2.485980326 |
| IGLV5-52   | ENSG00000211643.2  | 2.034061471 | 2.932030933 | 3.010475734 |
| LINC00622  | ENSG00000260941.1  | 4.07621959  | 2.314146762 | 3.646777325 |
| APOE       | ENSG00000130203.9  | 2.012100344 | 8.263105932 | 10.74852277 |
| MIR570     | ENSG00000207650.1  | 2.233431044 | 3.435648168 | 3.109571936 |
| PSD3       | ENSG00000156011.16 | 3.166807104 | 1.823343993 | 5.302201982 |
| DNAL1      | ENSG00000119661.14 | 2.361760527 | 2.223462783 | 2.80069889  |
| AL050341.2 | ENSG00000259943.1  | 3.322785045 | 2.836129697 | 2.885196839 |
| FICD       | ENSG00000198855.6  | 1.889519795 | 3.366828525 | 2.485976764 |
| INAFM1     | ENSG00000257704.3  | 2.781601213 | 1.931948602 | 3.457385634 |
| THAP8      | ENSG00000161277.10 | 3.201799701 | 2.641074195 | 1.920195523 |
| SNORA64    | ENSG00000207405.1  | 4.432699782 | 3.515526003 | 2.534484692 |
| EMILIN2    | ENSG00000132205.10 | 3.800732628 | 6.25029518  | 4.565063235 |
| RRN3P3     | ENSG00000257122.5  | 2.127714135 | 2.663563656 | 3.681944161 |
| ZNF124     | ENSG00000196418.12 | 4.171482987 | 1.786378121 | 2.534217625 |
| AC139530.1 | ENSG00000262049.1  | 2.196375124 | 1.820912692 | 2.059233216 |
| AC007996.1 | ENSG00000277534.1  | 2.676864278 | 2.967867033 | 2.628300343 |
| TBC1D24    | ENSG00000162065.12 | 3.61653672  | 3.150262092 | 4.986601968 |
| NDRG1      | ENSG00000104419.14 | 6.176439037 | 3.258822853 | 6.716440143 |
| FAM131A    | ENSG00000175182.14 | 3.512529816 | 4.077601287 | 3.777021541 |
| LIME1      | ENSG00000203896.9  | 2.323385797 | 3.113333541 | 2.648216988 |
| AKAP7      | ENSG00000118507.15 | 2.647128035 | 2.549304068 | 1.739068886 |
| AC093297.3 | ENSG00000272335.1  | 3.202194061 | 2.37235063  | 3.756863487 |
| PLXNA3     | ENSG00000130827.6  | 2.76217382  | 4.512781003 | 2.989995817 |
| MTO1       | ENSG00000135297.15 | 3.682134365 | 3.226045183 | 3.985379548 |
| CDADC1     | ENSG00000102543.14 | 2.677513377 | 2.17239153  | 2.404890349 |
| HSPA4L     | ENSG00000164070.11 | 2.186900258 | 1.892390508 | 3.885184929 |
| ST6GAL1    | ENSG00000073849.14 | 5.524584009 | 5.304545519 | 4.755284054 |
| AC133065.4 | ENSG00000263013.1  | 3.401757948 | 3.123467016 | 4.546385493 |

|            |                    |             |             |             |
|------------|--------------------|-------------|-------------|-------------|
| AC097359.2 | ENSG00000270194.1  | 2.509830826 | 3.259758717 | 2.40050526  |
| NICN1      | ENSG00000145029.13 | 2.621775971 | 2.410565383 | 2.175658811 |
| PCBD2      | ENSG00000132570.14 | 2.936280369 | 2.128587601 | 2.479725212 |
| PM20D2     | ENSG00000146281.5  | 3.803561698 | 2.990119922 | 3.332132735 |
| UBL7-AS1   | ENSG00000247240.7  | 2.718794956 | 2.682306435 | 1.978612892 |
| PLPP6      | ENSG00000205808.5  | 4.240537094 | 2.367307764 | 3.178495239 |
| AC004980.1 | ENSG00000205485.13 | 3.128046285 | 2.843494583 | 2.839583725 |
| AP001505.2 | ENSG00000276529.1  | 3.214617705 | 2.459936178 | 6.267432663 |
| POU2F1     | ENSG00000143190.21 | 3.537322117 | 2.830888894 | 3.221648104 |
| EPOR       | ENSG00000187266.13 | 3.312990647 | 3.94899479  | 2.901188337 |
| AP001258.1 | ENSG00000245571.6  | 2.197224339 | 3.021185341 | 2.767845308 |
| SPATA24    | ENSG00000170469.10 | 2.671711045 | 1.950709621 | 2.685449829 |
| XYLT1      | ENSG00000103489.11 | 2.594536722 | 1.760143048 | 4.146624749 |
| APOBEC3F   | ENSG00000128394.16 | 2.700582247 | 3.109890688 | 2.555883277 |
| ZNF524     | ENSG00000171443.6  | 3.117541841 | 2.750337541 | 4.294347983 |
| SDHAF4     | ENSG00000154079.5  | 2.030777141 | 2.530748166 | 3.185375893 |
| AC108449.2 | ENSG00000259366.1  | 2.011809043 | 3.83919019  | 2.026071612 |
| MT-TA      | ENSG00000210127.1  | 3.070247126 | 3.45947312  | 2.312618974 |
| WASHC1     | ENSG00000181404.15 | 1.984416447 | 3.004173989 | 3.263009856 |
| SPIN3      | ENSG00000204271.12 | 3.245048257 | 3.331187146 | 3.158999227 |
| VDR        | ENSG00000111424.10 | 4.808216025 | 2.839111238 | 1.880094859 |
| KCTD7      | ENSG00000243335.9  | 1.717639417 | 3.169984532 | 3.478135921 |
| ZNF254     | ENSG00000213096.10 | 3.163244735 | 2.818852228 | 1.778729994 |
| ZNF674-AS1 | ENSG00000230844.2  | 2.111402866 | 2.320921836 | 2.149374037 |
| MLPH       | ENSG00000115648.13 | 1.994437761 | 8.719615393 | 7.98473225  |
| TTC28-AS1  | ENSG00000235954.6  | 2.861217508 | 2.379555163 | 3.154797706 |
| TXNDC16    | ENSG00000087301.8  | 2.288271687 | 1.738408665 | 3.170339154 |
| RAB33B     | ENSG00000172007.5  | 2.088139639 | 2.119742536 | 2.350503853 |
| C3orf33    | ENSG00000174928.15 | 2.794288606 | 2.888730424 | 2.918930712 |
| DYNC111    | ENSG00000158560.14 | 2.207091757 | 4.925969574 | 4.382453206 |
| AC007485.2 | ENSG00000279059.1  | 2.91839248  | 2.908635051 | 2.751914956 |
| JMY        | ENSG00000152409.8  | 4.135860504 | 2.631620876 | 3.435910638 |
| CCDC189    | ENSG00000196118.11 | 3.923739402 | 1.897045594 | 2.338864288 |
| AL353763.2 | ENSG00000280077.1  | 2.705729714 | 2.153191932 | 2.358311768 |
| RTKN2      | ENSG00000182010.10 | 2.676762197 | 1.71211325  | 2.771403237 |
| KAT6B      | ENSG00000156650.12 | 3.630598335 | 2.833263992 | 2.990708797 |
| EDNRB      | ENSG00000136160.14 | 5.236135658 | 5.520032506 | 6.365204224 |
| RRAGB      | ENSG00000083750.12 | 3.567446594 | 3.232881732 | 3.719699891 |
| FRMD4B     | ENSG00000114541.14 | 5.524695703 | 5.605069316 | 6.144502953 |
| AUNIP      | ENSG00000127423.10 | 4.428897726 | 3.393097285 | 1.740643685 |
| PTPN3      | ENSG00000070159.13 | 4.439497728 | 4.668715985 | 5.110518851 |
| PXN-AS1    | ENSG00000255857.5  | 3.202013007 | 2.756527268 | 3.018618411 |
| DDAH1      | ENSG00000153904.18 | 4.153228667 | 3.069435368 | 3.00482982  |
| LRRC20     | ENSG00000172731.13 | 2.67970029  | 3.534596219 | 2.907750653 |
| LMCD1      | ENSG00000071282.11 | 4.33276107  | 3.962628806 | 2.88532523  |
| ZNF510     | ENSG00000081386.12 | 3.349473123 | 3.422025979 | 2.004596786 |

|            |                    |             |             |             |
|------------|--------------------|-------------|-------------|-------------|
| HOMEZ      | ENSG00000215271.7  | 1.759250936 | 3.103379563 | 2.875946038 |
| DOCK6      | ENSG00000130158.13 | 3.490484224 | 4.300657822 | 3.949558287 |
| SIPA1L3    | ENSG00000105738.10 | 4.411183244 | 3.149621999 | 4.580227148 |
| SPATA5     | ENSG00000145375.7  | 3.307570665 | 2.923826224 | 2.561368387 |
| ZNF569     | ENSG00000196437.10 | 2.693966282 | 1.984035197 | 1.897221781 |
| ZNF816     | ENSG00000180257.13 | 3.189310322 | 3.169584702 | 2.843592557 |
| F8A1       | ENSG00000277203.1  | 3.106816576 | 3.091371904 | 2.989005488 |
| CDIP1      | ENSG00000089486.16 | 4.339810325 | 5.331860557 | 5.072197283 |
| KHK        | ENSG00000138030.12 | 2.485005644 | 2.45087488  | 1.812672439 |
| FTO        | ENSG00000140718.20 | 3.83061792  | 3.497031586 | 4.133004546 |
| HERC6      | ENSG00000138642.14 | 2.291978514 | 3.078196039 | 2.007392991 |
| OAS2       | ENSG00000111335.12 | 2.970154575 | 2.914593067 | 1.729839752 |
| TNFAIP8L1  | ENSG00000185361.8  | 3.793112548 | 4.061490325 | 4.062422862 |
| ZNF813     | ENSG00000198346.10 | 1.860415725 | 2.138375786 | 2.95391504  |
| CHST6      | ENSG00000183196.8  | 3.712463851 | 3.775121956 | 2.663665727 |
| PGBD2      | ENSG00000185220.11 | 4.111744324 | 3.936258375 | 1.841045808 |
| HMG2N2P3   | ENSG00000230330.1  | 3.180616045 | 2.395452702 | 1.808257299 |
| ANKRD36    | ENSG00000135976.17 | 2.088458071 | 3.229559738 | 3.08817582  |
| LOXL3      | ENSG00000115318.11 | 7.420816721 | 3.323154798 | 4.326970371 |
| BICC1      | ENSG00000122870.11 | 2.46825951  | 2.496059393 | 3.0638369   |
| TSPAN33    | ENSG00000158457.5  | 3.84181994  | 5.28121985  | 5.826744924 |
| RPL23AP53  | ENSG00000223508.5  | 2.893743517 | 1.814353049 | 3.60410157  |
| ENTPD3-AS1 | ENSG00000223797.5  | 2.380835169 | 2.716712006 | 2.475485189 |
| NBPF26     | ENSG00000273136.6  | 3.268767103 | 3.243932302 | 1.942152797 |
| AC004967.1 | ENSG00000243554.1  | 2.733147936 | 3.176596991 | 1.867830782 |
| GLI3       | ENSG00000106571.12 | 4.129220157 | 3.640808761 | 5.308232049 |
| CCDC18-AS1 | ENSG00000223745.7  | 1.955888089 | 3.072268772 | 3.194992526 |
| XRCC3      | ENSG00000126215.13 | 4.821005079 | 4.321464756 | 2.007181519 |
| SLC35E4    | ENSG00000100036.12 | 3.324254191 | 2.868404988 | 3.304471838 |
| RTN4RL2    | ENSG00000186907.7  | 2.328960293 | 3.939790462 | 3.615608498 |
| AL365205.1 | ENSG00000124593.15 | 2.038561743 | 5.028682624 | 3.930310408 |
| AMOT       | ENSG00000126016.15 | 5.015270991 | 4.263695771 | 5.280251458 |
| AC009533.1 | ENSG00000111788.10 | 1.887743478 | 2.387518606 | 2.660379138 |
| CEP19      | ENSG00000174007.7  | 1.73968195  | 2.745880899 | 3.19861212  |
| SAMD9L     | ENSG00000177409.11 | 2.666405958 | 4.189859734 | 1.86277964  |
| MCOLN2     | ENSG00000153898.12 | 3.098936523 | 4.173196184 | 3.425472557 |
| SPATA33    | ENSG00000167523.13 | 3.811647838 | 2.9070281   | 2.141187176 |
| SMIM8      | ENSG00000111850.10 | 1.925224859 | 2.550660704 | 2.703354054 |
| RFFL       | ENSG00000092871.16 | 4.305232171 | 3.398134831 | 4.071785151 |
| DLGAP1-AS2 | ENSG00000262001.1  | 3.825351166 | 3.516028085 | 5.892623732 |
| AC138969.1 | ENSG00000183889.12 | 2.470074069 | 2.272081555 | 3.157049112 |
| PRELID3A   | ENSG00000141391.13 | 2.0923751   | 2.920486066 | 1.782394652 |
| CPT1A      | ENSG00000110090.12 | 5.498175957 | 4.125468046 | 3.367225169 |
| ADAT2      | ENSG00000189007.15 | 3.544936345 | 2.568432802 | 2.173907259 |
| ZBTB25     | ENSG00000089775.11 | 2.271731781 | 2.291594855 | 1.737063745 |
| U2AF1L4    | ENSG00000161265.14 | 3.262618242 | 3.102525507 | 3.305247429 |



|            |                    |             |             |             |
|------------|--------------------|-------------|-------------|-------------|
| ASTN2      | ENSG00000148219.16 | 1.980026125 | 3.807152085 | 2.129952258 |
| TEKT4P2    | ENSG00000188681.11 | 2.705592828 | 1.841864438 | 1.664087874 |
| PTPRG-AS1  | ENSG00000241472.6  | 1.76992243  | 3.081058164 | 2.301816488 |
| MLLT11     | ENSG00000213190.3  | 6.231323261 | 1.611343469 | 2.444961776 |
| RNF24      | ENSG00000101236.16 | 4.421455787 | 3.924335416 | 2.142654735 |
| HOXB5      | ENSG00000120075.5  | 2.899337025 | 2.393173274 | 1.683042297 |
| ELOVL4     | ENSG00000118402.5  | 4.122266612 | 2.821275772 | 2.601787281 |
| NAPRT      | ENSG00000147813.15 | 4.894246386 | 1.843529158 | 4.505655925 |
| ERV3-1     | ENSG00000213462.4  | 2.309494286 | 2.480245359 | 2.029343246 |
| AC008771.1 | ENSG00000249042.5  | 3.225098625 | 2.317201224 | 4.072081045 |
| WDR25      | ENSG00000176473.13 | 3.404827555 | 2.550647976 | 1.596215207 |
| FUK        | ENSG00000157353.16 | 3.424728288 | 3.504998106 | 4.312574308 |
| ZNF641     | ENSG00000167528.12 | 1.941993435 | 2.31940849  | 2.628196363 |
| NATD1      | ENSG00000274180.1  | 3.273006887 | 1.847057882 | 4.367421411 |
| ZNF500     | ENSG00000103199.13 | 2.687985768 | 2.363789794 | 2.776075473 |
| DUSP5      | ENSG00000138166.5  | 4.937297999 | 2.847121348 | 7.545051487 |
| FAM135A    | ENSG00000082269.16 | 3.192594818 | 2.655657189 | 3.751783711 |
| KIAA2026   | ENSG00000183354.11 | 4.024520179 | 3.416370051 | 2.812585561 |
| TYMSOS     | ENSG00000176912.3  | 1.956813441 | 2.082280545 | 1.64795252  |
| SLC35E2    | ENSG00000215790.6  | 2.544778516 | 2.093885411 | 3.794083324 |
| ZNF57      | ENSG00000171970.12 | 2.311893344 | 3.322382077 | 2.812851383 |
| ZNF701     | ENSG00000167562.12 | 2.566290819 | 3.105706299 | 3.816961101 |
| KCNC4      | ENSG00000116396.14 | 1.884091626 | 2.697584632 | 2.391972412 |
| FZD5       | ENSG00000163251.3  | 1.639515904 | 2.289107252 | 2.2139641   |
| HDAC11     | ENSG00000163517.14 | 1.693554915 | 3.964350204 | 3.692912081 |
| AC016394.1 | ENSG00000272599.2  | 3.690790888 | 2.508563866 | 1.940181252 |
| PLP1       | ENSG00000123560.13 | 5.292076134 | 6.654398753 | 6.126835109 |
| IRS1       | ENSG00000169047.5  | 1.76741216  | 2.663841353 | 4.575354029 |
| TMEM147-AS | ENSG00000236144.6  | 3.913275325 | 3.694698641 | 2.051924235 |
| LINC00174  | ENSG00000179406.7  | 2.421556519 | 3.000835091 | 2.989946478 |
| KLHL25     | ENSG00000183655.12 | 2.200791852 | 2.001613171 | 2.016501427 |
| MLLT3      | ENSG00000171843.15 | 3.995473124 | 2.522151787 | 2.462013223 |
| OTUD1      | ENSG00000165312.6  | 2.377396585 | 2.877715856 | 3.339509782 |
| TMEM45A    | ENSG00000181458.10 | 2.028157151 | 4.802123108 | 2.665345592 |
| NLRC5      | ENSG00000140853.15 | 3.633818398 | 2.219497426 | 3.156444057 |
| SDCBP2-AS1 | ENSG00000234684.6  | 2.137664246 | 2.338124339 | 1.644711547 |
| AC211429.1 | ENSG00000242073.2  | 2.357204176 | 2.944873627 | 2.181854714 |
| TESK2      | ENSG00000070759.16 | 3.173409227 | 5.068080439 | 3.950799108 |
| SLC27A3    | ENSG00000143554.13 | 2.654907184 | 7.469131288 | 1.929184326 |
| CPEB2      | ENSG00000137449.15 | 1.958799847 | 3.165982442 | 5.483609189 |
| APOBEC3G   | ENSG00000239713.8  | 3.916928834 | 1.9190979   | 4.238107926 |
| ZSCAN16    | ENSG00000196812.4  | 2.647490312 | 2.275028653 | 2.970595333 |
| ZNF577     | ENSG00000161551.14 | 1.953657239 | 3.366459946 | 3.443558416 |
| CDC14A     | ENSG00000079335.18 | 3.030965933 | 1.715537715 | 2.028001963 |
| VPS9D1     | ENSG00000075399.13 | 3.283760942 | 3.857998258 | 3.917759614 |
| IKBKG      | ENSG00000269335.5  | 3.145289596 | 2.382666742 | 2.538011398 |

|            |                    |             |             |             |
|------------|--------------------|-------------|-------------|-------------|
| TGFB3      | ENSG00000069702.10 | 1.807659478 | 4.317772069 | 2.256966997 |
| CAMK2N1    | ENSG00000162545.5  | 6.553308183 | 4.77368283  | 1.667808595 |
| AP000525.1 | ENSG00000272872.1  | 1.837053965 | 2.620662924 | 3.488151348 |
| PUS10      | ENSG00000162927.13 | 1.826083846 | 3.400931099 | 3.151575474 |
| AC074117.1 | ENSG00000234072.1  | 3.563539781 | 3.633074867 | 1.864616356 |
| AMZ2P1     | ENSG00000214174.8  | 1.664069461 | 2.005456426 | 3.680331627 |
| AMN1       | ENSG00000151743.10 | 3.231951922 | 1.796765747 | 3.354973913 |
| SLC1A3     | ENSG00000079215.13 | 2.525390483 | 2.187914609 | 1.749921136 |
| FAM234B    | ENSG00000084444.13 | 3.274924809 | 3.316499104 | 3.504998502 |
| RHOBTB1    | ENSG00000072422.16 | 1.643118949 | 3.436178939 | 2.563237501 |
| VIM-AS1    | ENSG00000229124.6  | 4.322686956 | 3.47715797  | 3.315411905 |
| AC012510.1 | ENSG00000273466.1  | 3.05004563  | 2.092843448 | 1.846024611 |
| AC024075.1 | ENSG00000267904.1  | 2.458446812 | 3.447876853 | 2.57344606  |
| TRAF1      | ENSG00000056558.10 | 5.353245232 | 1.893243583 | 4.938908464 |
| SIRT5      | ENSG00000124523.15 | 1.662942246 | 3.597869216 | 4.098223882 |
| NPM1P27    | ENSG00000249353.2  | 4.07570676  | 2.918688644 | 3.268897373 |
| ZNF605     | ENSG00000196458.10 | 2.947601524 | 2.778129564 | 1.633291193 |
| HHLA3      | ENSG00000197568.13 | 2.834921225 | 2.37721435  | 1.781286429 |
| ATXN7L2    | ENSG00000162650.16 | 3.326295502 | 1.978353227 | 1.714673973 |
| ZNRF3      | ENSG00000183579.15 | 2.581687669 | 2.9761567   | 4.450442375 |
| TMEM140    | ENSG00000146859.6  | 1.631352222 | 4.52668563  | 4.646219181 |
| ZNF222     | ENSG00000159885.13 | 2.751910948 | 1.813389801 | 3.397058571 |
| ACBD4      | ENSG00000181513.14 | 3.015575666 | 4.063865898 | 4.006730929 |
| IQCC       | ENSG00000160051.11 | 3.195016882 | 1.803988032 | 1.66621334  |
| ZSWIM4     | ENSG00000132003.9  | 4.451586053 | 3.831533373 | 3.412059587 |
| CALML4     | ENSG00000129007.14 | 1.97018789  | 1.947759982 | 2.175616427 |
| JAM3       | ENSG00000166086.12 | 4.657099431 | 4.539674527 | 1.811934427 |
| COX10-AS1  | ENSG00000236088.9  | 4.075522521 | 1.792314313 | 3.036819847 |
| snoU109    | ENSG00000238832.1  | 2.199377539 | 3.516383426 | 1.77202721  |
| PNPLA3     | ENSG00000100344.10 | 3.239987853 | 4.364143756 | 1.684971248 |
| ZSCAN22    | ENSG00000182318.5  | 2.61565961  | 2.058070409 | 2.216029497 |
| ACVR2A     | ENSG00000121989.14 | 2.393289128 | 2.05926263  | 2.686206251 |
| AKAP2      | ENSG00000241978.9  | 5.187123034 | 6.009242087 | 5.848997768 |
| ZBTB26     | ENSG00000171448.8  | 3.471189611 | 3.393890693 | 2.841363047 |
| AC125232.1 | ENSG00000231259.4  | 2.3200439   | 2.497078481 | 2.220761951 |
| SNPH       | ENSG00000101298.13 | 2.918311841 | 3.564680724 | 1.643905974 |
| NOP14-AS1  | ENSG00000249673.6  | 3.306646405 | 2.525155003 | 3.786290496 |
| MROH6      | ENSG00000204839.8  | 3.114779823 | 2.149823711 | 2.481761037 |
| PRKCH      | ENSG00000027075.14 | 4.266897327 | 4.778671085 | 3.273267934 |
| LCAT       | ENSG00000213398.7  | 1.819085958 | 1.925324393 | 2.20550558  |
| BCL7A      | ENSG00000110987.8  | 2.293658407 | 3.218255414 | 4.896431825 |
| USP46-AS1  | ENSG00000248866.1  | 3.30139552  | 2.304314161 | 2.206893691 |
| ZNF594     | ENSG00000180626.9  | 3.068024058 | 2.47689448  | 2.800188017 |
| LY6G5B     | ENSG00000240053.8  | 2.099118604 | 3.002601915 | 3.113628619 |
| KANSL1L    | ENSG00000144445.16 | 1.919934467 | 3.008281197 | 3.528620495 |
| AL035541.1 | ENSG00000227297.1  | 6.158453988 | 6.346458763 | 1.514700399 |

|             |                    |             |             |             |
|-------------|--------------------|-------------|-------------|-------------|
| HDAC9       | ENSG00000048052.21 | 1.654649391 | 4.373749374 | 4.316959929 |
| SMAGP       | ENSG00000170545.16 | 4.918348125 | 2.878010095 | 3.043217558 |
| CEP112      | ENSG00000154240.16 | 1.793198948 | 2.100601363 | 3.354717778 |
| GPR89B      | ENSG00000188092.14 | 2.254469816 | 1.900941095 | 2.00240853  |
| AC116050.1  | ENSG00000143429.10 | 2.843783279 | 3.43950463  | 2.012499289 |
| TMEM229B    | ENSG00000198133.8  | 4.46489964  | 4.107192998 | 4.821486906 |
| HIC2        | ENSG00000169635.9  | 1.953532648 | 2.291815157 | 2.131212073 |
| TMEM117     | ENSG00000139173.9  | 3.282937162 | 3.954335412 | 1.880785129 |
| AC010186.2  | ENSG00000256594.8  | 1.501452375 | 3.453488923 | 3.713440127 |
| MTMR9       | ENSG00000104643.9  | 3.661763741 | 1.531936902 | 3.494973461 |
| MMP25-AS1   | ENSG00000261971.6  | 3.473975283 | 3.273664338 | 2.573685451 |
| PGGHG       | ENSG00000142102.15 | 2.818770335 | 4.755712235 | 3.999702773 |
| CGREF1      | ENSG00000138028.15 | 4.149444843 | 4.394539048 | 1.582309831 |
| GRASP       | ENSG00000161835.10 | 1.863904705 | 3.411347238 | 2.426706563 |
| FOXO1       | ENSG00000150907.7  | 3.750383468 | 3.671886688 | 2.182770684 |
| TRAF3       | ENSG00000131323.14 | 3.141208059 | 3.235818151 | 1.932841667 |
| ZNF548      | ENSG00000188785.11 | 4.00556625  | 1.712657245 | 4.134587204 |
| ZNF182      | ENSG00000147118.11 | 2.930195875 | 3.334915991 | 2.82785242  |
| KITLG       | ENSG00000049130.14 | 1.639553473 | 3.442599634 | 2.565564098 |
| PAQR8       | ENSG00000170915.8  | 2.937474896 | 4.235552915 | 1.703365363 |
| NAT1        | ENSG00000171428.13 | 1.942802234 | 2.210502187 | 2.521749436 |
| AL136370.1  | ENSG00000272579.1  | 1.939029333 | 2.897691477 | 4.085451129 |
| TRMT10B     | ENSG00000165275.9  | 3.306965287 | 1.947341193 | 2.432832657 |
| PPP1R13B    | ENSG00000088808.16 | 3.271783915 | 2.769252046 | 2.832882174 |
| SYNM        | ENSG00000182253.14 | 5.825325011 | 4.914823602 | 6.099781412 |
| USP31       | ENSG00000103404.14 | 3.167892117 | 2.28900919  | 2.198500779 |
| RALGPS2     | ENSG00000116191.17 | 3.829490445 | 3.236591589 | 1.673725948 |
| NUP50-AS1   | ENSG00000226328.6  | 3.583709678 | 3.973826776 | 2.927799256 |
| IRAK4       | ENSG00000198001.13 | 3.290064088 | 3.363902123 | 1.71597227  |
| RHOF        | ENSG00000139725.7  | 4.128442267 | 3.616751075 | 2.454336822 |
| CLHC1       | ENSG00000162994.15 | 2.286414227 | 3.467171954 | 1.603428744 |
| PKD1P6-NPIP | ENSG00000270580.5  | 4.121211775 | 2.537389725 | 3.070855881 |
| KBTBD8      | ENSG00000163376.11 | 2.475139381 | 2.046968697 | 1.601248939 |
| SARM1       | ENSG00000004139.13 | 3.944558985 | 4.396479852 | 2.546464895 |
| C18orf54    | ENSG00000166845.13 | 2.583201113 | 3.189662758 | 3.040073573 |
| EFCAB2      | ENSG00000203666.12 | 2.431366675 | 2.219961659 | 2.337550968 |
| MAML2       | ENSG00000184384.13 | 4.677329532 | 2.144281401 | 5.030206457 |
| CA13        | ENSG00000185015.7  | 2.08933375  | 2.706664857 | 2.950559026 |
| AC016876.1  | ENSG00000233223.2  | 5.378040907 | 1.798383365 | 2.516143591 |
| ARL3        | ENSG00000138175.8  | 4.11393598  | 2.446135497 | 3.453080336 |
| FAM50B      | ENSG00000145945.5  | 3.058758772 | 4.425977518 | 4.388868344 |
| ZFP30       | ENSG00000120784.15 | 1.513164111 | 2.829364373 | 3.247756716 |
| EPHA2       | ENSG00000142627.12 | 6.051747361 | 1.674806736 | 7.744002443 |
| ZNF738      | ENSG00000172687.13 | 4.954123597 | 3.323896859 | 1.835666018 |
| SACS        | ENSG00000151835.14 | 3.293449516 | 2.474331539 | 2.869922201 |
| RRAGD       | ENSG00000025039.14 | 3.80573535  | 5.453829486 | 5.693517915 |

|            |                    |             |             |             |
|------------|--------------------|-------------|-------------|-------------|
| CA11       | ENSG00000063180.8  | 2.910728839 | 4.394761151 | 2.677419052 |
| NBR2       | ENSG00000198496.10 | 3.559124045 | 2.384881284 | 5.842024024 |
| EID2B      | ENSG00000176401.5  | 2.91197669  | 3.332664003 | 1.803945534 |
| PLEKHG3    | ENSG00000126822.16 | 2.646160943 | 3.157055798 | 2.910171783 |
| RPS27AP16  | ENSG00000224631.4  | 3.581813898 | 2.654916241 | 1.99656647  |
| GDPD5      | ENSG00000158555.14 | 3.085166208 | 4.084427452 | 5.001031435 |
| IGIP       | ENSG00000182700.4  | 1.540727842 | 1.611055495 | 2.623933488 |
| LIMD2      | ENSG00000136490.8  | 3.283004444 | 3.653090345 | 3.771584601 |
| PINK1-AS   | ENSG00000117242.7  | 2.950599091 | 1.633482993 | 1.524201429 |
| PER3       | ENSG00000049246.14 | 1.843117134 | 3.373893736 | 4.478154637 |
| MIR647     | ENSG00000207554.1  | 2.481895483 | 2.719302082 | 3.544086006 |
| FDXACB1    | ENSG00000255561.6  | 2.303530973 | 1.696727671 | 2.201312291 |
| AC010326.4 | ENSG00000270804.1  | 2.120237977 | 2.020164298 | 1.856131676 |
| MT-TS1     | ENSG00000210151.2  | 5.153322394 | 5.629676556 | 3.685562435 |
| UBE2FP1    | ENSG00000224080.1  | 3.333806375 | 2.668977083 | 2.560546513 |
| GLCCI1     | ENSG00000106415.12 | 2.320838375 | 3.02513399  | 3.740616599 |
| CHN1       | ENSG00000128656.13 | 4.885507914 | 3.289222331 | 4.522464044 |
| AC012360.3 | ENSG00000272994.1  | 1.493464632 | 2.54186554  | 2.192269885 |
| PTPN4      | ENSG00000088179.8  | 2.464571551 | 2.770705419 | 3.653970759 |
| MYC        | ENSG00000136997.17 | 3.865190435 | 4.202297397 | 4.927138067 |
| ZNF528     | ENSG00000167555.13 | 2.053304636 | 4.060215128 | 4.584609191 |
| TTC30B     | ENSG00000196659.9  | 2.507270666 | 2.476014022 | 1.623981531 |
| BCL3       | ENSG00000069399.14 | 4.743729435 | 2.490495832 | 1.537396005 |
| AC024060.1 | ENSG00000271870.1  | 2.783661363 | 3.055587087 | 2.677014649 |
| KIAA1328   | ENSG00000150477.14 | 2.279762785 | 2.682036479 | 2.248564104 |
| ASMTL-AS1  | ENSG00000236017.8  | 2.045457595 | 2.622084875 | 1.57481338  |
| FAM86EP    | ENSG00000251669.5  | 2.459793358 | 2.023819127 | 1.665132255 |
| GPR19      | ENSG00000183150.7  | 2.632104241 | 3.501130769 | 3.094653119 |
| ZNF461     | ENSG00000197808.11 | 1.899943361 | 2.510281853 | 2.395757926 |
| ZNF484     | ENSG00000127081.13 | 2.89620561  | 3.297867547 | 1.95250779  |
| ZNF280C    | ENSG00000056277.15 | 2.590736456 | 2.940752135 | 1.494647442 |
| AC023509.1 | ENSG00000257379.1  | 3.305161805 | 4.456964426 | 3.652411414 |
| ARHGAP39   | ENSG00000147799.11 | 2.727570392 | 2.0964146   | 1.615604347 |
| LACC1      | ENSG00000179630.10 | 1.545473454 | 2.904559447 | 2.942345005 |
| ZNF230     | ENSG00000159882.12 | 2.26174526  | 1.541118589 | 1.604688834 |
| TRIM36     | ENSG00000152503.9  | 3.414554079 | 1.667305733 | 2.260539611 |
| ZNF25      | ENSG00000175395.15 | 1.46350437  | 2.093465271 | 3.132005228 |
| AL157392.3 | ENSG00000239665.8  | 2.472930724 | 3.196983549 | 3.408637228 |
| SHROOM2    | ENSG00000146950.12 | 5.678098759 | 4.119242904 | 3.540154219 |
| ARMCX5     | ENSG00000125962.14 | 2.73196988  | 3.45938805  | 4.169309403 |
| AC024592.3 | ENSG00000267740.5  | 2.135470689 | 3.118795162 | 2.0629599   |
| RPARP-AS1  | ENSG00000269609.5  | 3.698078579 | 2.117912681 | 3.553664925 |
| NR4A2      | ENSG00000153234.13 | 4.122621149 | 3.659176241 | 1.657728    |
| ZNF699     | ENSG00000196110.7  | 1.691655394 | 2.778574618 | 2.743859002 |
| AC004812.2 | ENSG00000277283.1  | 1.72470771  | 1.584973704 | 2.57693904  |
| AL160006.1 | ENSG00000258634.3  | 2.992160571 | 3.280792681 | 2.078991626 |

|            |                    |             |             |             |
|------------|--------------------|-------------|-------------|-------------|
| SMIM14     | ENSG00000163683.11 | 2.706072501 | 2.761689465 | 4.090064744 |
| ABHD18     | ENSG00000164074.14 | 2.748770209 | 1.513374919 | 2.60213273  |
| TMOD2      | ENSG00000128872.9  | 2.929935648 | 1.698240746 | 3.832009144 |
| OSCP1      | ENSG00000116885.18 | 3.249154847 | 2.174553753 | 1.655449389 |
| AC000123.3 | ENSG00000280347.1  | 2.095436254 | 1.532038175 | 2.350253279 |
| AC145207.5 | ENSG00000263731.1  | 2.809146156 | 2.344358629 | 1.482240263 |
| CHAC2      | ENSG00000143942.4  | 4.763562493 | 3.751496377 | 1.691853669 |
| ZNF841     | ENSG00000197608.11 | 2.185309954 | 3.355487045 | 2.295536216 |
| MORN1      | ENSG00000116151.13 | 4.433890357 | 3.854053215 | 1.530146504 |
| EOGT       | ENSG00000163378.13 | 4.111040986 | 3.831533947 | 5.128921955 |
| F11R       | ENSG00000158769.17 | 2.929429166 | 5.568098826 | 3.676493924 |
| SEMA3B     | ENSG00000012171.19 | 6.993274515 | 2.38845484  | 1.868799763 |
| GNAO1      | ENSG00000087258.14 | 5.069113621 | 4.295102358 | 3.75553902  |
| ZNF235     | ENSG00000159917.15 | 2.585060394 | 1.776542625 | 2.537163521 |
| ADGRG6     | ENSG00000112414.14 | 4.974597639 | 5.421309158 | 5.223761102 |
| PYGL       | ENSG00000100504.16 | 6.948155574 | 8.249314573 | 2.716786471 |
| ANO8       | ENSG00000074855.10 | 3.72263825  | 2.96687473  | 3.856774374 |
| SMCO4      | ENSG00000166002.6  | 1.609144477 | 3.120340025 | 3.144855547 |
| EPOP       | ENSG00000273604.1  | 4.542868389 | 3.683217071 | 1.506267778 |
| APBB2      | ENSG00000163697.16 | 3.667692412 | 3.13687541  | 5.949662201 |
| ZNF674     | ENSG00000251192.7  | 2.179009877 | 1.990682407 | 2.207040848 |
| C11orf96   | ENSG00000187479.5  | 1.893133382 | 7.694121659 | 5.224561753 |
| TIAM2      | ENSG00000146426.17 | 3.371541185 | 1.708162725 | 2.912390067 |
| AC002467.1 | ENSG00000241764.3  | 2.681887726 | 3.709398671 | 1.791957443 |
| STXBP4     | ENSG00000166263.13 | 1.84224649  | 1.660423892 | 2.392179404 |
| SEL1L3     | ENSG00000091490.10 | 4.881395696 | 4.031462598 | 4.541929124 |
| FJX1       | ENSG00000179431.6  | 4.621739105 | 4.134397006 | 2.774862523 |
| RGL3       | ENSG00000205517.12 | 3.848120125 | 3.875165779 | 3.377996683 |
| JUP        | ENSG00000173801.16 | 1.596430974 | 3.985662444 | 2.737910765 |
| SNORA71B   | ENSG00000235408.5  | 2.840965769 | 2.923195355 | 1.78308775  |
| ZSWIM3     | ENSG00000132801.6  | 2.412985698 | 1.660260331 | 2.368952731 |
| OXCT1      | ENSG00000083720.12 | 5.806225493 | 5.324114215 | 6.22542283  |
| GIMAP2     | ENSG00000106560.10 | 2.031732319 | 1.678046325 | 3.381086617 |
| ERVK13-1   | ENSG00000260565.6  | 2.855165736 | 2.498337221 | 2.981950674 |
| DLG3       | ENSG00000082458.11 | 3.224605253 | 2.174831483 | 2.277048328 |
| LGR4       | ENSG00000205213.13 | 3.202015757 | 2.955943274 | 3.023323096 |
| TTC7B      | ENSG00000165914.14 | 1.893075343 | 2.835465967 | 1.919363703 |
| FBXL2      | ENSG00000153558.13 | 1.660041758 | 2.610710132 | 2.705560648 |
| AC018647.2 | ENSG00000271122.1  | 3.44349971  | 3.494039798 | 3.119844297 |
| DIXDC1     | ENSG00000150764.13 | 5.118626706 | 2.530930768 | 1.871600639 |
| BTN3A3     | ENSG00000111801.15 | 3.26485112  | 3.412456375 | 1.453513414 |
| C19orf57   | ENSG00000132016.11 | 2.85530888  | 2.738468278 | 3.515871116 |
| LURAP1     | ENSG00000171357.5  | 2.113341537 | 3.420173474 | 1.988959485 |
| SH3D21     | ENSG00000214193.10 | 2.853050463 | 2.150372386 | 2.42811271  |
| ZNF416     | ENSG00000083817.8  | 2.689510886 | 1.43784692  | 2.769804264 |
| FAM78B     | ENSG00000188859.6  | 4.242153627 | 1.617629587 | 3.148251735 |

|             |                    |             |             |             |
|-------------|--------------------|-------------|-------------|-------------|
| TET2        | ENSG00000168769.13 | 2.911652615 | 1.993331191 | 3.166541118 |
| RAB40B      | ENSG00000141542.10 | 2.121205111 | 1.991802599 | 2.467050469 |
| ANKRD42     | ENSG00000137494.13 | 3.562967543 | 2.082992397 | 2.313836231 |
| ZNF775      | ENSG00000196456.11 | 2.046610422 | 2.516477821 | 3.363948933 |
| EEF1AKMT3   | ENSG00000123427.16 | 2.013917733 | 1.879400668 | 5.16211255  |
| ZNF561-AS1  | ENSG00000267106.5  | 1.752554504 | 2.21663379  | 2.872865476 |
| TMEM106A    | ENSG00000184988.8  | 2.249073564 | 3.292471416 | 2.948868034 |
| TRIM52-AS1  | ENSG00000248275.1  | 3.311616947 | 1.583806673 | 3.927586966 |
| TMEM182     | ENSG00000170417.15 | 1.950610995 | 3.199606646 | 2.849382648 |
| AC007406.5  | ENSG00000261799.1  | 1.667056867 | 2.381361319 | 3.544256907 |
| MT-TM       | ENSG00000210112.1  | 2.444797952 | 2.923149604 | 8.114706901 |
| ADCY7       | ENSG00000121281.12 | 4.079388146 | 2.918770118 | 1.753771601 |
| AC012615.1  | ENSG00000261526.2  | 1.667100452 | 1.779640288 | 3.176650796 |
| NUDT18      | ENSG00000275074.1  | 2.367351273 | 3.428430685 | 2.51712161  |
| GAREM2      | ENSG00000157833.12 | 1.636201972 | 3.638748181 | 2.799765705 |
| EXO5        | ENSG00000164002.11 | 3.83549884  | 3.270609677 | 2.155274582 |
| APOLD1      | ENSG00000178878.12 | 1.632533416 | 8.188825791 | 5.763028703 |
| DISC1       | ENSG00000162946.21 | 1.407845635 | 2.207423727 | 3.616527115 |
| MIR1244-3   | ENSG00000283429.1  | 3.448693639 | 2.862718902 | 1.828582705 |
| AC138123.1  | ENSG00000256393.1  | 3.623548682 | 2.985443499 | 1.919789897 |
| ZNF341      | ENSG00000131061.13 | 2.394999908 | 1.816684588 | 1.410931818 |
| CCDC120     | ENSG00000147144.12 | 1.402329028 | 2.976744586 | 1.811559415 |
| AC009275.1  | ENSG00000273297.1  | 1.618125403 | 2.458676853 | 3.283013402 |
| PIK3CD-AS2  | ENSG00000231789.2  | 1.809087666 | 3.8891679   | 3.776223018 |
| ZSCAN16-AS1 | ENSG00000269293.2  | 1.552562467 | 1.84918145  | 2.486087103 |
| HLA-F-AS1   | ENSG00000214922.9  | 1.433793702 | 5.661955482 | 2.961424085 |
| ZNF527      | ENSG00000189164.14 | 2.577022885 | 2.177748526 | 2.488493761 |
| YY2         | ENSG00000230797.2  | 1.982953444 | 2.197397707 | 3.530380412 |
| ZNF33B      | ENSG00000196693.14 | 3.749172539 | 1.664778009 | 3.527920759 |
| ZNF264      | ENSG00000083844.10 | 3.445218313 | 2.14526218  | 2.378720991 |
| GATA6       | ENSG00000141448.8  | 1.516487598 | 1.471297292 | 2.980534522 |
| AC012467.2  | ENSG00000271976.1  | 3.245483621 | 2.778181363 | 1.598940313 |
| CCDC15      | ENSG00000149548.14 | 3.142090288 | 1.355132164 | 2.575856452 |
| ZNF805      | ENSG00000204524.6  | 2.383243482 | 2.162426611 | 2.800509361 |
| TAPBPL      | ENSG00000139192.11 | 2.874933283 | 1.406564501 | 2.091122397 |
| RASSF7      | ENSG00000099849.14 | 1.930440642 | 2.921400129 | 3.022058241 |
| NUDT13      | ENSG00000166321.13 | 1.814072339 | 1.563133974 | 2.65364025  |
| CAB39L      | ENSG00000102547.18 | 1.459278006 | 3.864449393 | 4.30918095  |
| TTLL7       | ENSG00000137941.16 | 1.891922128 | 3.004430584 | 1.576704478 |
| GLYCTK      | ENSG00000168237.17 | 3.951955478 | 3.125457317 | 3.137461038 |
| PANK1       | ENSG00000152782.16 | 2.504158238 | 1.925117706 | 1.608898034 |
| AC048341.3  | ENSG00000275180.1  | 3.412570829 | 3.230767018 | 2.924878053 |
| ZNF704      | ENSG00000164684.13 | 2.461453238 | 4.599389128 | 5.72430597  |
| NFKBID      | ENSG00000167604.14 | 2.702254158 | 3.41776809  | 2.229150169 |
| CTDSPL      | ENSG00000144677.14 | 3.252454839 | 3.769782849 | 1.992854621 |
| CARF        | ENSG00000138380.17 | 1.636510482 | 1.797804905 | 1.814470087 |

|            |                    |             |             |             |
|------------|--------------------|-------------|-------------|-------------|
| PHLPP2     | ENSG00000040199.18 | 3.335812253 | 2.648011721 | 3.118818074 |
| ZNF329     | ENSG00000181894.14 | 2.139101444 | 3.537738601 | 3.194655217 |
| CAMK2N2    | ENSG00000163888.3  | 2.390590867 | 2.572964323 | 1.932816107 |
| RCBTB2     | ENSG00000136161.12 | 1.78215501  | 2.954722287 | 3.999228183 |
| MIR4442    | ENSG00000283971.1  | 3.312289849 | 2.753969013 | 2.999719835 |
| ZNF589     | ENSG00000164048.13 | 3.413128814 | 3.213000953 | 2.954705113 |
| SLC7A8     | ENSG00000092068.19 | 1.517602706 | 6.541881879 | 7.684779166 |
| TRIM45     | ENSG00000134253.9  | 1.800142441 | 2.903776007 | 2.467947188 |
| ZNF823     | ENSG00000197933.12 | 2.617742351 | 1.387146596 | 2.140063434 |
| MFSD4B     | ENSG00000173214.5  | 2.119503012 | 3.031038642 | 2.0551767   |
| GTF2H5     | ENSG00000272047.1  | 2.266944099 | 1.344134267 | 1.716275051 |
| CCDC24     | ENSG00000159214.12 | 2.333344179 | 3.459751621 | 2.908979463 |
| TRIM16L    | ENSG00000108448.21 | 4.365970917 | 2.170127811 | 2.633363272 |
| C14orf80   | ENSG00000185347.17 | 4.385262371 | 3.488598163 | 1.416824175 |
| RNF217     | ENSG00000146373.16 | 2.287728132 | 1.725535609 | 2.406719218 |
| AC021097.1 | ENSG00000272661.1  | 2.170058606 | 2.674239188 | 1.718666261 |
| SLC2A6     | ENSG00000160326.13 | 2.933135366 | 5.040926627 | 1.481102655 |
| C17orf49   | ENSG00000258315.5  | 3.111396993 | 1.758085282 | 2.56002038  |
| ZNF460     | ENSG00000197714.8  | 2.488176301 | 1.358996949 | 2.792087707 |
| PCNX2      | ENSG00000135749.18 | 4.347575874 | 2.825494355 | 3.678749099 |
| FKRP       | ENSG00000181027.10 | 4.420804866 | 2.201654068 | 3.594963016 |
| SNORD17    | ENSG00000212232.1  | 5.185616267 | 3.555559796 | 1.729256058 |
| MIR6835    | ENSG00000276404.1  | 2.604348579 | 1.758900403 | 1.850388922 |
| MEX3A      | ENSG00000254726.2  | 4.672006778 | 3.139279165 | 1.681918775 |
| TGFA       | ENSG00000163235.15 | 8.572803089 | 4.421665364 | 1.907918912 |
| AC022400.7 | ENSG00000279088.1  | 2.697679692 | 2.405381978 | 2.687675087 |
| BEND3      | ENSG00000178409.13 | 2.713861851 | 2.516368588 | 1.375557195 |
| IRF7       | ENSG00000185507.19 | 2.039101769 | 2.676258221 | 4.249654506 |
| PUS7L      | ENSG00000129317.14 | 3.577923899 | 2.96712503  | 1.646490282 |
| ZNF232     | ENSG00000167840.13 | 4.048369327 | 1.589165369 | 2.657644839 |
| ZNF431     | ENSG00000196705.8  | 2.740760027 | 2.297526018 | 1.630435257 |
| PPP4R1L    | ENSG00000124224.16 | 3.111282937 | 3.175262654 | 1.670690241 |
| PPP1R3E    | ENSG00000235194.8  | 2.253155446 | 1.523791594 | 1.754141723 |
| DGKH       | ENSG00000102780.16 | 2.79704774  | 2.449463013 | 2.699939324 |
| FAM171A2   | ENSG00000161682.14 | 1.930207359 | 2.43065154  | 1.707213055 |
| RAB20      | ENSG00000139832.4  | 4.323873378 | 4.788407688 | 1.459337101 |
| AL138724.1 | ENSG00000272269.1  | 1.445955896 | 1.692421604 | 2.127172745 |
| NT5M       | ENSG00000205309.13 | 1.974810974 | 2.487855324 | 2.106261472 |
| VASH1-AS1  | ENSG00000258301.3  | 1.84171137  | 2.156064456 | 3.753785915 |
| TDP1       | ENSG00000042088.13 | 4.392117142 | 3.111957582 | 1.690219246 |
| EFNA4      | ENSG00000243364.7  | 3.123141399 | 3.408494176 | 1.431863153 |
| ZBTB49     | ENSG00000168826.15 | 2.196514574 | 1.614094235 | 3.260515013 |
| FZD4       | ENSG00000174804.3  | 3.805566503 | 2.237149087 | 1.289846626 |
| AZIN2      | ENSG00000142920.16 | 2.144955039 | 2.817338065 | 1.425660371 |
| ZXDB       | ENSG00000198455.4  | 2.715034365 | 2.427238757 | 2.638813197 |
| AC092368.3 | ENSG00000261512.2  | 1.382855882 | 2.801063018 | 2.830979034 |

|             |                    |             |             |             |
|-------------|--------------------|-------------|-------------|-------------|
| NPAS1       | ENSG00000130751.9  | 3.572622153 | 5.029428788 | 5.297948601 |
| AL731577.2  | ENSG00000249456.1  | 3.597490191 | 2.385005452 | 3.477445789 |
| GNG4        | ENSG00000168243.10 | 5.716943019 | 3.023565007 | 4.385143204 |
| AC068870.2  | ENSG00000277782.1  | 2.437848019 | 3.212403305 | 4.810128173 |
| PARD6G      | ENSG00000178184.15 | 2.997197154 | 5.186376521 | 3.794110089 |
| C16orf95    | ENSG00000260456.6  | 1.368183281 | 2.159473574 | 1.713178527 |
| FRS3        | ENSG00000137218.10 | 2.00514856  | 2.639108306 | 2.473400025 |
| COL27A1     | ENSG00000196739.14 | 4.08065722  | 3.83345272  | 4.085525411 |
| AC015813.1  | ENSG00000264112.1  | 1.579211314 | 3.166858383 | 2.693580421 |
| NAT6        | ENSG00000243477.5  | 3.944222988 | 3.561399897 | 1.583489307 |
| DAGLA       | ENSG00000134780.9  | 2.391226362 | 1.330507799 | 3.067615798 |
| AC091982.4  | ENSG00000275765.5  | 2.261400286 | 1.569944411 | 1.533594523 |
| MIR3681HG   | ENSG00000224184.5  | 2.999791161 | 1.534902352 | 2.07857178  |
| MTCO2P12    | ENSG00000229344.1  | 1.51079533  | 3.251255321 | 3.475406087 |
| TCEANC2     | ENSG00000116205.12 | 2.469859862 | 1.698090594 | 1.420439031 |
| FO538757.1  | ENSG00000279457.4  | 2.133913347 | 1.50994576  | 3.375703552 |
| PSTK        | ENSG00000179988.13 | 2.807412556 | 1.85734158  | 1.291604652 |
| FAM185A     | ENSG00000222011.8  | 2.668121006 | 2.30812989  | 1.523173065 |
| MTND1P23    | ENSG00000225972.1  | 1.470802442 | 3.235015824 | 2.05875309  |
| RGS20       | ENSG00000147509.13 | 1.474167266 | 5.031453557 | 5.070033952 |
| AC009237.14 | ENSG00000272913.1  | 3.897921858 | 1.419776763 | 3.87092348  |
| PIM1        | ENSG00000137193.13 | 3.103042561 | 1.445097152 | 2.735185383 |
| DDX58       | ENSG00000107201.9  | 1.486738938 | 2.016963434 | 1.266877595 |
| HYI         | ENSG00000178922.16 | 4.54048352  | 2.989853305 | 3.502611093 |
| AC083899.1  | ENSG00000204745.3  | 1.313261022 | 1.825986868 | 1.459504153 |
| CXorf57     | ENSG00000147231.13 | 2.489107101 | 2.95175912  | 4.494445125 |
| ZNF530      | ENSG00000183647.10 | 2.614953045 | 1.600327997 | 1.87494078  |
| BX322557.1  | ENSG00000215447.7  | 3.951372158 | 3.223738483 | 2.333302316 |
| NKX6-1      | ENSG00000163623.9  | 2.989055455 | 2.098951116 | 2.11513871  |
| DNAJC15     | ENSG00000120675.5  | 2.016246293 | 3.89634978  | 3.43244439  |
| AL604028.1  | ENSG00000230896.1  | 2.23152223  | 1.821693612 | 2.24944897  |
| ZNF606      | ENSG00000166704.11 | 2.045605057 | 1.457917563 | 2.780094339 |
| PTPN21      | ENSG00000070778.12 | 2.021997048 | 1.335488977 | 2.126296959 |
| LRRC49      | ENSG00000137821.11 | 3.216297178 | 2.333226165 | 3.099581023 |
| AC073335.2  | ENSG00000273142.1  | 2.58426877  | 3.836531031 | 3.142278613 |
| TMPPE       | ENSG00000188167.8  | 2.160967399 | 2.218490451 | 1.689126991 |
| TLR3        | ENSG00000164342.12 | 2.601332918 | 2.228088231 | 2.212619865 |
| AC012513.3  | ENSG00000279348.1  | 2.502164022 | 1.522911944 | 1.237892761 |
| NOTCH2NL    | ENSG00000264343.5  | 5.294308038 | 2.514543515 | 2.449749249 |
| GLUD2       | ENSG00000182890.4  | 2.189716808 | 4.393766664 | 3.232394023 |
| SNORA52     | ENSG00000199785.1  | 3.123125034 | 3.072428409 | 2.409094468 |
| LINC01560   | ENSG00000196741.5  | 2.668164301 | 1.661272339 | 1.943865252 |
| ZNF260      | ENSG00000254004.6  | 3.147426134 | 3.689119349 | 2.386411038 |
| ZNF772      | ENSG00000197128.11 | 4.157305753 | 1.482044735 | 2.709366242 |
| RAB30       | ENSG00000137502.9  | 2.057637263 | 1.838613001 | 3.000081352 |
| ZDHHC14     | ENSG00000175048.16 | 2.079150756 | 1.747885274 | 2.688810709 |



|            |                    |             |             |             |
|------------|--------------------|-------------|-------------|-------------|
| KDM7A      | ENSG00000006459.10 | 2.832465987 | 2.052967478 | 3.281925573 |
| MCM3AP-AS1 | ENSG00000215424.9  | 1.61496197  | 2.417056946 | 2.111729649 |
| CCDC121    | ENSG00000176714.9  | 2.312192795 | 1.974220174 | 2.339319555 |
| MDM4       | ENSG00000198625.12 | 3.224567706 | 2.494673822 | 3.421782096 |
| ZNF133     | ENSG00000125846.15 | 2.985398354 | 2.792384633 | 2.162192278 |
| AL021707.2 | ENSG00000228274.3  | 2.601866363 | 2.493759732 | 2.949536695 |
| AC022509.3 | ENSG00000256894.1  | 1.848967653 | 3.111770778 | 2.750948443 |
| NP1PA1     | ENSG00000183426.16 | 2.469732532 | 2.65792679  | 3.814531989 |
| TTC7A      | ENSG00000068724.15 | 3.840293292 | 3.258783579 | 1.429730656 |
| HCN3       | ENSG00000143630.9  | 1.383098725 | 2.11891032  | 1.624077169 |
| RECK       | ENSG00000122707.11 | 2.448289649 | 3.261362546 | 1.510086811 |
| SP140L     | ENSG00000185404.16 | 4.127962603 | 4.186420661 | 1.515863    |
| ZNF597     | ENSG00000167981.5  | 1.510255847 | 2.929367807 | 1.749881714 |
| GABPB1-AS1 | ENSG00000244879.6  | 4.20016833  | 4.262471687 | 3.001741327 |
| AF117829.1 | ENSG00000251136.8  | 2.712151581 | 1.615067469 | 3.572626118 |
| TEAD2      | ENSG00000074219.13 | 4.673123617 | 5.391920896 | 1.334911585 |
| PPP2R3A    | ENSG00000073711.10 | 3.983993803 | 4.072262784 | 1.659193189 |
| PRAG1      | ENSG00000275342.4  | 1.667297607 | 2.265248813 | 4.519228272 |
| snoU2_19   | ENSG00000201592.1  | 3.159383505 | 1.609044368 | 2.976806426 |
| CCDC28B    | ENSG00000160050.14 | 4.936886167 | 1.479626144 | 3.344719033 |
| ZNF619     | ENSG00000177873.12 | 2.302293573 | 2.56852371  | 2.946923661 |
| HERC2P3    | ENSG00000180229.12 | 3.821676663 | 3.527950551 | 3.825171037 |
| AC135983.2 | ENSG00000223509.8  | 2.198283828 | 1.672559936 | 2.62652315  |
| LRMDA      | ENSG00000148655.14 | 1.612612282 | 3.769261619 | 5.862360736 |
| ARID3B     | ENSG00000179361.17 | 1.762857625 | 3.717401633 | 1.940988271 |
| ZNF782     | ENSG00000196597.11 | 2.226398649 | 2.663761586 | 2.0633807   |
| RILP       | ENSG00000167705.11 | 2.333119276 | 2.17939409  | 3.210323269 |
| ZNF445     | ENSG00000185219.16 | 2.881561235 | 3.159243279 | 2.450782347 |
| PGM2L1     | ENSG00000165434.7  | 1.359320661 | 2.825824075 | 1.94733157  |
| FBXL20     | ENSG00000108306.11 | 4.271530594 | 3.62542221  | 4.01162186  |
| SLC7A2     | ENSG00000003989.17 | 3.021690075 | 4.337744883 | 3.779169209 |
| AC092919.2 | ENSG00000279673.1  | 1.830725442 | 2.921024919 | 1.970412973 |
| AC109322.1 | ENSG00000255224.1  | 2.637561891 | 3.310675752 | 2.213511412 |
| NRG2       | ENSG00000158458.19 | 3.135531775 | 1.430928875 | 1.571681224 |
| ALG10      | ENSG00000139133.6  | 3.299486751 | 2.537950093 | 1.393761344 |
| ZNF77      | ENSG00000175691.8  | 2.270060565 | 3.337730239 | 3.109558423 |
| AP002387.1 | ENSG00000254682.1  | 3.122361624 | 3.148889348 | 1.520071787 |
| SLC37A2    | ENSG00000134955.11 | 5.356176006 | 4.323497117 | 1.389925232 |
| ZNF221     | ENSG00000159905.14 | 1.778357508 | 1.981300365 | 1.614894558 |
| GALNT12    | ENSG00000119514.6  | 1.359397675 | 4.170123371 | 2.95935982  |
| EFCAB13    | ENSG00000178852.15 | 2.491749277 | 2.42095125  | 2.13597703  |
| TTC21A     | ENSG00000168026.18 | 2.129852486 | 2.581427622 | 2.756972485 |
| MSTO2P     | ENSG00000203761.5  | 2.124455718 | 2.314609702 | 1.740870972 |
| KLF12      | ENSG00000118922.17 | 2.799071988 | 3.109862038 | 4.156543161 |
| LRP5       | ENSG00000162337.11 | 5.466718123 | 5.27284022  | 4.364341231 |
| ZNF17      | ENSG00000186272.12 | 2.639043337 | 1.664919556 | 2.330313692 |

|            |                    |             |             |             |
|------------|--------------------|-------------|-------------|-------------|
| DPF1       | ENSG00000011332.19 | 3.720577889 | 2.760534314 | 1.619854186 |
| PDIA3P1    | ENSG00000180867.10 | 2.23532603  | 2.328830308 | 2.733519558 |
| ZNF41      | ENSG00000147124.12 | 3.552778976 | 2.144985753 | 2.175711226 |
| OTX1       | ENSG00000115507.9  | 1.642434708 | 3.094756144 | 2.301323252 |
| EPAS1      | ENSG00000116016.13 | 1.22964807  | 7.03422545  | 7.999532341 |
| PCOLCE2    | ENSG00000163710.7  | 4.342018312 | 4.702888762 | 2.803354677 |
| ZBTB43     | ENSG00000169155.9  | 1.83132076  | 2.882481527 | 2.655356349 |
| ZDHHC21    | ENSG00000175893.11 | 4.00442899  | 3.116471898 | 2.958119667 |
| HTD2       | ENSG00000255154.7  | 4.392840511 | 4.286370838 | 1.64676708  |
| SNORD48    | ENSG00000201823.1  | 2.87561752  | 2.584226207 | 2.232484224 |
| TBC1D12    | ENSG00000108239.8  | 3.025246419 | 1.661828625 | 2.88403408  |
| THAP10     | ENSG00000129028.8  | 2.953179806 | 1.440816026 | 1.75095696  |
| LRIG3      | ENSG00000139263.11 | 4.665211447 | 2.790075642 | 1.552246004 |
| AC009506.1 | ENSG00000224152.1  | 1.581520052 | 2.25004357  | 2.013735668 |
| CAPS2      | ENSG00000180881.19 | 1.58113717  | 2.325140278 | 4.268042868 |
| ZBTB12     | ENSG00000204366.3  | 3.577953614 | 2.364667518 | 3.310162822 |
| FGFR1      | ENSG00000077782.19 | 4.065064489 | 3.780410836 | 5.664568908 |
| LINC01963  | ENSG00000260804.3  | 3.346374094 | 2.30342393  | 1.232061411 |
| GSEC       | ENSG00000280832.1  | 3.017682891 | 1.325501021 | 1.354510837 |
| TTC30A     | ENSG00000197557.6  | 2.784007939 | 2.756461311 | 1.278769978 |
| RPL3P4     | ENSG00000232573.1  | 3.217611477 | 2.304382823 | 2.365856814 |
| SALL2      | ENSG00000165821.11 | 2.260521352 | 2.892779864 | 2.988339597 |
| ZNF136     | ENSG00000196646.11 | 2.523929615 | 1.627616671 | 2.03218683  |
| LINC00205  | ENSG00000223768.1  | 3.096914022 | 2.386481961 | 1.592738446 |
| PQLC3      | ENSG00000162976.12 | 1.352049524 | 5.203864735 | 4.534836016 |
| TRANK1     | ENSG00000168016.13 | 2.904258761 | 3.484327167 | 1.32877782  |
| AC026304.1 | ENSG00000268129.1  | 1.717034582 | 2.672746312 | 1.401805863 |
| AL391244.3 | ENSG00000272455.1  | 3.804268675 | 2.606387574 | 1.463437608 |
| CDHR3      | ENSG00000128536.15 | 1.639355235 | 2.026773549 | 2.568393854 |
| SHF        | ENSG00000138606.19 | 2.389515493 | 2.476586877 | 3.007315313 |
| AC242426.3 | ENSG00000237188.3  | 2.281297236 | 2.169809206 | 2.644286869 |
| FIGN       | ENSG00000182263.13 | 1.653147332 | 2.835076326 | 3.390610416 |
| AP001107.9 | ENSG00000255468.6  | 1.839093523 | 1.512846376 | 2.972015578 |
| AC008966.1 | ENSG00000247796.2  | 2.01686953  | 1.478495354 | 1.710161034 |
| TBC1D32    | ENSG00000146350.13 | 2.145950123 | 1.434963829 | 1.418983968 |
| NFATC2     | ENSG00000101096.19 | 7.01855785  | 1.64797981  | 7.598598259 |
| DDIAS      | ENSG00000165490.12 | 3.43286354  | 2.778812869 | 2.339579409 |
| AC016065.1 | ENSG00000246089.3  | 2.533065184 | 1.254921088 | 2.978601514 |
| TTC28      | ENSG00000100154.14 | 1.593230266 | 1.802324142 | 3.178542251 |
| C1orf74    | ENSG00000162757.4  | 2.877949205 | 1.237264308 | 2.18303161  |
| ZNF570     | ENSG00000171827.10 | 1.892086677 | 2.022195491 | 1.126835173 |
| TEX9       | ENSG00000151575.14 | 1.988322288 | 2.536681655 | 3.542017275 |
| FAM122C    | ENSG00000156500.14 | 2.021000854 | 1.913406063 | 2.653872169 |
| SH2D5      | ENSG00000189410.11 | 1.462676608 | 1.247147257 | 1.258728608 |
| TNFRSF21   | ENSG00000146072.6  | 6.227090391 | 4.76071506  | 1.382228707 |
| SLC41A2    | ENSG00000136052.9  | 3.158012495 | 3.476750495 | 2.307981497 |

|             |                    |             |             |             |
|-------------|--------------------|-------------|-------------|-------------|
| U62317.3    | ENSG00000272821.1  | 2.379511123 | 1.824855509 | 2.037384117 |
| RAB3IP      | ENSG00000127328.21 | 2.90353635  | 2.667172218 | 5.124178982 |
| AC125807.2  | ENSG00000250899.3  | 3.413356011 | 1.30503245  | 1.87344493  |
| SLC4A11     | ENSG00000088836.12 | 2.603957482 | 3.049521178 | 1.746642574 |
| TRIM32      | ENSG00000119401.10 | 2.21687606  | 3.650416374 | 1.90208797  |
| ZNF852      | ENSG00000178917.15 | 1.781481113 | 2.071820369 | 2.355798171 |
| CXADR       | ENSG00000154639.18 | 1.866983317 | 4.177888291 | 1.97792614  |
| RPL15P3     | ENSG00000212802.4  | 2.673901701 | 2.035471311 | 1.520605658 |
| IQCK        | ENSG00000174628.16 | 2.59492564  | 1.805348869 | 2.931925138 |
| LINC00641   | ENSG00000258441.1  | 1.245484518 | 1.515925977 | 1.426359763 |
| CCDC125     | ENSG00000183323.12 | 3.555692018 | 3.138860318 | 3.780355632 |
| AC009061.2  | ENSG00000270049.2  | 1.856634213 | 1.243030708 | 2.728361876 |
| EFR3B       | ENSG00000084710.13 | 1.210852189 | 3.523519105 | 3.301404078 |
| TOR3A       | ENSG00000186283.13 | 6.203456251 | 5.012927513 | 5.343449672 |
| NCK1-AS1    | ENSG00000239213.5  | 1.359406845 | 2.813363906 | 2.375285252 |
| AC005076.1  | ENSG00000224046.1  | 1.711490642 | 1.314797135 | 1.748162475 |
| CYB5R4      | ENSG00000065615.13 | 2.513807666 | 2.549805726 | 2.367094748 |
| BCLAF3      | ENSG00000173681.16 | 2.377227471 | 2.145874135 | 3.624885991 |
| AL451165.2  | ENSG00000272288.5  | 1.333065672 | 2.195089526 | 2.207049909 |
| PPM1M       | ENSG00000164088.17 | 3.89544005  | 3.283970837 | 2.639236417 |
| MTCP1       | ENSG00000214827.9  | 3.121814927 | 2.803211946 | 2.810105144 |
| DCBLD1      | ENSG00000164465.18 | 3.448296088 | 2.676326403 | 3.976301604 |
| AC114271.1  | ENSG00000274425.1  | 3.139220154 | 2.397438363 | 1.097298045 |
| HIST2H2BE   | ENSG00000184678.10 | 1.419470752 | 4.805766014 | 1.284328176 |
| MVB12B      | ENSG00000196814.14 | 3.31743042  | 3.545721896 | 2.904639907 |
| ST3GAL6-AS1 | ENSG00000239445.5  | 2.121560592 | 3.690026248 | 4.647522934 |
| TMEM44-AS1  | ENSG00000231770.5  | 2.912138821 | 3.614430671 | 1.468620365 |
| SLC27A5     | ENSG00000083807.9  | 4.010411553 | 1.668435818 | 2.038705843 |
| KBTBD3      | ENSG00000182359.14 | 2.549818821 | 1.895106795 | 2.412200209 |
| ZNF85       | ENSG00000105750.14 | 3.881721023 | 2.936811107 | 1.340475524 |
| NRDE2       | ENSG00000119720.17 | 2.675582789 | 2.154207313 | 1.115151135 |
| ARRDC4      | ENSG00000140450.8  | 2.420867866 | 3.788576177 | 1.237059113 |
| SIX4        | ENSG00000100625.8  | 3.411030628 | 2.50478926  | 2.372695345 |
| ATP2A1-AS1  | ENSG00000260442.5  | 3.940255143 | 2.069258511 | 2.081760655 |
| STXBP6      | ENSG00000168952.15 | 1.142517275 | 3.335794854 | 4.804162165 |
| ATP7B       | ENSG00000123191.14 | 1.971519353 | 3.449176186 | 4.114493698 |
| EPM2A       | ENSG00000112425.14 | 2.497503914 | 1.951947678 | 2.09017501  |
| ZNF223      | ENSG00000178386.12 | 1.611865507 | 1.735963288 | 2.289892917 |
| STARD7-AS1  | ENSG00000204685.6  | 1.382076832 | 2.839398109 | 2.164951536 |
| VASH1       | ENSG00000071246.10 | 3.624913454 | 1.275203326 | 4.646703551 |
| KLF5        | ENSG00000102554.13 | 5.059094645 | 3.564976349 | 1.709062129 |
| FTX         | ENSG00000230590.9  | 2.951952015 | 3.878193581 | 2.078231919 |
| KIF24       | ENSG00000186638.16 | 2.582254453 | 1.369957392 | 1.091083451 |
| FBXL15      | ENSG00000107872.12 | 4.000176456 | 3.342752792 | 3.121206678 |
| ZNF250      | ENSG00000196150.13 | 2.471693548 | 1.405648631 | 2.476665558 |
| LINC00630   | ENSG00000223546.6  | 2.482551883 | 3.059955836 | 2.843023963 |

|            |                    |             |             |             |
|------------|--------------------|-------------|-------------|-------------|
| MT-TN      | ENSG00000210135.1  | 3.486892594 | 3.744449134 | 2.666848909 |
| SNORA24    | ENSG00000275994.1  | 3.616375035 | 2.468911935 | 2.125117318 |
| CYB5D1     | ENSG00000182224.11 | 2.55031605  | 1.242718344 | 1.403126869 |
| SLC31A2    | ENSG00000136867.10 | 2.76401938  | 4.84136693  | 1.364120784 |
| MAP1B      | ENSG00000131711.14 | 4.93943943  | 4.859149289 | 7.5048444   |
| GFOD1      | ENSG00000145990.10 | 1.337767604 | 3.396372307 | 2.522921203 |
| EEPD1      | ENSG00000122547.10 | 1.637992113 | 3.57754747  | 2.358082982 |
| ABHD8      | ENSG00000127220.5  | 4.801733547 | 4.321498487 | 4.427996635 |
| SNORA5C    | ENSG00000201772.1  | 2.554462423 | 3.242425002 | 2.432907236 |
| ZNF839     | ENSG00000022976.15 | 2.879207789 | 2.971649454 | 1.432670242 |
| PDCD4-AS1  | ENSG00000203497.2  | 2.646623164 | 2.454307346 | 3.548411047 |
| RUNX1      | ENSG00000159216.18 | 4.768201199 | 4.203031711 | 1.092051765 |
| PDCL       | ENSG00000136940.13 | 5.074326524 | 5.168085273 | 1.417193703 |
| ZFP1       | ENSG00000184517.11 | 3.724664765 | 2.925488354 | 3.977912565 |
| AP006621.3 | ENSG00000255284.1  | 2.899173496 | 3.348281422 | 1.288300447 |
| TNFAIP8    | ENSG00000145779.7  | 1.82131948  | 1.46282639  | 1.680602489 |
| GCH1       | ENSG00000131979.18 | 2.232788492 | 1.126762778 | 3.224611289 |
| AC040169.1 | ENSG00000260018.1  | 1.261360295 | 1.725507274 | 1.831181417 |
| ZNF84      | ENSG00000198040.10 | 3.816669427 | 3.513508156 | 1.578983888 |
| ZNF615     | ENSG00000197619.13 | 2.768822817 | 2.130746204 | 2.25838272  |
| AC083880.1 | ENSG00000273391.1  | 2.484935513 | 1.772049117 | 2.296490493 |
| AL691447.3 | ENSG00000282886.1  | 2.418170502 | 1.731653369 | 1.424751229 |
| A2M        | ENSG00000175899.14 | 5.543726942 | 7.030302451 | 7.922212568 |
| PELI2      | ENSG00000139946.9  | 2.978496247 | 3.174941072 | 3.811548333 |
| ANKRD36C   | ENSG00000174501.14 | 2.101395204 | 2.43893485  | 1.083675197 |
| MIR22HG    | ENSG00000186594.14 | 2.504068027 | 2.285922385 | 3.533172281 |
| ZNF324     | ENSG00000083812.11 | 3.350404222 | 2.378698824 | 2.267108437 |
| TRAM2-AS1  | ENSG00000225791.6  | 2.136537901 | 1.964466359 | 2.791316372 |
| FSCN1      | ENSG00000075618.17 | 8.717375563 | 1.353396471 | 6.657951875 |
| RPLPOP6    | ENSG00000213553.4  | 2.900254273 | 1.508660017 | 2.631810388 |
| ZNF627     | ENSG00000198551.9  | 3.670074596 | 2.972416859 | 3.193035803 |
| ERBB2      | ENSG00000141736.13 | 5.41600921  | 5.229339847 | 1.32732337  |
| PDZRN3     | ENSG00000121440.14 | 3.552760807 | 5.614247242 | 4.869020608 |
| RASSF4     | ENSG00000107551.20 | 1.590409363 | 1.687983161 | 1.983587776 |
| HIST1H2AC  | ENSG00000180573.9  | 1.482576327 | 4.896805708 | 1.410606959 |
| FAXC       | ENSG00000146267.11 | 1.201532306 | 1.961225343 | 2.239803091 |
| ZNF724     | ENSG00000196081.9  | 4.283691256 | 2.503420801 | 1.140254326 |
| GOLGA7B    | ENSG00000155265.10 | 3.943533016 | 4.277250778 | 3.97368124  |
| PARGP1     | ENSG00000239883.8  | 2.37440849  | 1.830786717 | 1.837577429 |
| TMTC1      | ENSG00000133687.15 | 1.255148003 | 3.735815833 | 2.796356712 |
| HOXD13     | ENSG00000128714.5  | 3.496623003 | 3.471525206 | 3.292607116 |
| LINC01481  | ENSG00000257815.5  | 2.393590872 | 1.378199517 | 3.199838169 |
| LBH        | ENSG00000213626.11 | 1.149505028 | 4.22232129  | 5.549097511 |
| AL118516.1 | ENSG00000260708.1  | 3.851372217 | 3.559162638 | 3.189211911 |
| AC024075.2 | ENSG00000269044.2  | 2.624274858 | 3.401206099 | 2.569027469 |
| AC138696.2 | ENSG00000272172.1  | 2.081477055 | 2.333294598 | 1.463494786 |

|            |                    |             |             |             |
|------------|--------------------|-------------|-------------|-------------|
| SCN1B      | ENSG00000105711.11 | 2.124434937 | 2.658259848 | 1.912604149 |
| AP003486.1 | ENSG00000255455.2  | 1.770519004 | 1.101863299 | 2.467912716 |
| TNFSF9     | ENSG00000125657.4  | 4.182765424 | 1.539713516 | 4.347872105 |
| ZNF696     | ENSG00000185730.7  | 3.309466356 | 2.135847991 | 3.07641102  |
| MIR186     | ENSG00000207721.1  | 2.738671637 | 2.108629146 | 2.561303055 |
| ZBTB37     | ENSG00000185278.15 | 2.056997248 | 2.029715602 | 1.753067539 |
| ZNF419     | ENSG00000105136.20 | 3.052799702 | 1.102917969 | 2.581214848 |
| MINDY4     | ENSG00000106125.14 | 4.192843534 | 2.809327358 | 1.529038628 |
| COL7A1     | ENSG00000114270.17 | 3.364077724 | 2.494944897 | 2.445435293 |
| AL133520.1 | ENSG00000273893.1  | 1.686162755 | 2.047307461 | 3.019336606 |
| FAM3C2     | ENSG00000174028.6  | 2.561562071 | 1.769918115 | 1.28938455  |
| IL18BP     | ENSG00000137496.17 | 1.270919175 | 1.926520309 | 1.671821191 |
| TPT1-AS1   | ENSG00000170919.15 | 3.669782122 | 4.320092629 | 3.00628296  |
| PLXNA2     | ENSG00000076356.6  | 1.384409764 | 1.140390712 | 5.836570735 |
| SNORA73B   | ENSG00000200087.1  | 4.386517116 | 3.350583274 | 1.383176308 |
| IRX5       | ENSG00000176842.14 | 3.226931367 | 2.536934497 | 3.214354682 |
| LINC01293  | ENSG00000230836.1  | 5.004265235 | 1.311395692 | 2.030152005 |
| PHKA1      | ENSG00000067177.14 | 4.141747392 | 2.988448925 | 3.987439692 |
| AC127502.2 | ENSG00000270055.1  | 1.638663216 | 1.577439125 | 2.366936597 |
| ACVR2B     | ENSG00000114739.13 | 2.974480825 | 3.595901008 | 2.839757097 |
| ZNF23      | ENSG00000167377.17 | 2.400041666 | 2.279432569 | 3.405843964 |
| TNFSF12    | ENSG00000239697.10 | 1.070738032 | 2.689172541 | 4.927487657 |
| AP006621.5 | ENSG00000279672.1  | 2.505082888 | 2.877177718 | 1.706551619 |
| AL035587.1 | ENSG00000231113.2  | 1.74513445  | 1.783989164 | 1.717501372 |
| 44077      | ENSG00000100167.19 | 2.259811757 | 4.535973811 | 5.181780123 |
| SNORD69    | ENSG00000212452.1  | 2.086786792 | 2.554498111 | 1.299190707 |
| AL162231.1 | ENSG00000187186.14 | 2.317245273 | 3.383998726 | 2.420519372 |
| FAM83H     | ENSG00000180921.6  | 0.996126871 | 5.221714526 | 2.240518651 |
| C17orf100  | ENSG00000256806.5  | 1.434396823 | 1.304807181 | 2.899485528 |
| SLC22A18AS | ENSG00000254827.5  | 1.171992674 | 2.649768389 | 4.234714334 |
| FAM72B     | ENSG00000188610.12 | 3.582392924 | 1.767243406 | 1.143161209 |
| TXNIP      | ENSG00000265972.5  | 4.334200394 | 5.063896917 | 2.008638106 |
| TMEM158    | ENSG00000249992.1  | 5.291775    | 4.884260592 | 4.019895819 |
| ADAT3      | ENSG00000213638.5  | 2.70324269  | 2.891944199 | 2.381617161 |
| BMF        | ENSG00000104081.13 | 2.836473675 | 1.485653661 | 4.203163259 |
| FANCB      | ENSG00000181544.13 | 4.247797397 | 2.460328579 | 1.104948635 |
| FMNL1      | ENSG00000184922.13 | 1.082077447 | 4.229973483 | 3.836932434 |
| CORO1A     | ENSG00000102879.15 | 3.868757509 | 1.397906052 | 1.634077965 |
| SYT14      | ENSG00000143469.18 | 2.195239049 | 3.322809636 | 1.45501918  |
| ITPRIP     | ENSG00000148841.15 | 5.7788808   | 6.002459868 | 1.019097517 |
| MLKL       | ENSG00000168404.12 | 4.675904607 | 2.725975775 | 2.59912975  |
| AC068580.4 | ENSG00000250644.3  | 2.507951966 | 4.762644218 | 4.22611017  |
| AC022107.1 | ENSG00000280187.1  | 2.901857173 | 1.73771322  | 0.996842613 |
| INTU       | ENSG00000164066.12 | 0.99205449  | 1.765612017 | 2.244660363 |
| CDK18      | ENSG00000117266.15 | 3.85601137  | 2.840645087 | 2.548546384 |
| NXN        | ENSG00000167693.16 | 1.193980671 | 3.723131509 | 5.756990037 |

|            |                    |             |             |             |
|------------|--------------------|-------------|-------------|-------------|
| C9orf172   | ENSG00000232434.2  | 2.182632724 | 2.719158119 | 2.997994206 |
| AL450405.1 | ENSG00000230202.1  | 5.216605014 | 2.536608315 | 2.253003808 |
| ARMCX5-GPR | ENSG00000271147.7  | 1.473417782 | 2.815397671 | 3.294531995 |
| AC069281.2 | ENSG00000274272.1  | 1.176833352 | 3.020477592 | 2.372283203 |
| ELF4       | ENSG00000102034.16 | 3.404418173 | 4.474443819 | 4.752231136 |
| GPR146     | ENSG00000164849.9  | 1.545219345 | 1.420437573 | 1.908858448 |
| RPAP2      | ENSG00000122484.8  | 1.983217546 | 2.063057873 | 1.635546051 |
| TLCD2      | ENSG00000185561.9  | 1.887212174 | 1.272074241 | 3.320586078 |
| AC087388.1 | ENSG00000262251.1  | 3.187675518 | 1.41733104  | 1.818331376 |
| ATF3       | ENSG00000162772.16 | 2.972789744 | 1.643653753 | 5.10447218  |
| ROPN1B     | ENSG00000114547.9  | 2.967208892 | 3.853927967 | 4.589478436 |
| ZDHHC23    | ENSG00000184307.14 | 2.272325813 | 2.889537408 | 5.070680649 |
| TRPS1      | ENSG00000104447.12 | 3.838401803 | 3.074381166 | 3.102643548 |
| MT-TR      | ENSG00000210174.1  | 1.559899857 | 4.036380868 | 1.445466904 |
| DUXAP8     | ENSG00000271672.1  | 2.795954332 | 1.854663367 | 3.000807785 |
| TMCC1-AS1  | ENSG00000271270.5  | 1.095411143 | 2.738382135 | 2.083806314 |
| TM7SF2     | ENSG00000149809.14 | 2.580791602 | 4.170545765 | 4.324409745 |
| AL590867.2 | ENSG00000218426.5  | 2.425068068 | 1.852531581 | 1.319337992 |
| CAMKK1     | ENSG00000004660.14 | 1.588387227 | 1.781696373 | 1.053607877 |
| TBKBP1     | ENSG00000198933.9  | 2.800149605 | 3.9373474   | 4.036200699 |
| AC127024.5 | ENSG00000266490.1  | 3.167116873 | 2.048811868 | 2.1438775   |
| MC1R       | ENSG00000258839.3  | 2.837345307 | 3.916548322 | 4.379278325 |
| SNORD62B   | ENSG00000231587.1  | 2.438097932 | 3.120666194 | 1.363410674 |
| ZFP82      | ENSG00000181007.8  | 3.344442068 | 1.706912876 | 2.953906549 |
| SNORA5A    | ENSG00000206838.1  | 2.1013803   | 3.242577329 | 2.922760447 |
| AC006538.1 | ENSG00000261342.1  | 1.647352844 | 2.106081983 | 1.555183954 |
| MAN1C1     | ENSG00000117643.14 | 2.923143646 | 2.112373607 | 3.187925605 |
| ARHGEF26   | ENSG00000114790.12 | 3.815188697 | 3.938282882 | 1.174288121 |
| AC010642.2 | ENSG00000283103.1  | 2.177843223 | 1.550846855 | 1.491186489 |
| AC141586.1 | ENSG00000215154.6  | 1.746385792 | 2.704369201 | 3.392300428 |
| FAM86B3P   | ENSG00000173295.7  | 2.682797013 | 3.138418563 | 2.311513416 |
| C3orf62    | ENSG00000188315.7  | 2.472951417 | 2.106070644 | 1.195619334 |
| AL662795.2 | ENSG00000280128.1  | 2.345251158 | 2.227018763 | 2.087896402 |
| DNASE1     | ENSG00000213918.10 | 1.930159537 | 2.807563139 | 3.88686808  |
| RTP4       | ENSG00000136514.2  | 1.017013681 | 2.458018352 | 2.382007119 |
| RPS3AP26   | ENSG00000214389.2  | 2.481976086 | 1.272046085 | 1.803287486 |
| UBOX5      | ENSG00000185019.16 | 2.014485376 | 2.475229123 | 0.965329132 |
| AC019069.1 | ENSG00000272711.1  | 3.319751882 | 4.066089619 | 1.121798596 |
| PLXNC1     | ENSG00000136040.8  | 0.951050437 | 4.801549379 | 4.996707687 |
| INSR       | ENSG00000171105.13 | 3.887609014 | 3.446265872 | 3.620677808 |
| DAPK1      | ENSG00000196730.12 | 1.283384113 | 5.21652     | 3.517421919 |
| WASH7P     | ENSG00000227232.5  | 1.203267328 | 1.771964167 | 2.771816103 |
| HNRNPCP1   | ENSG00000258900.1  | 2.084150811 | 1.359454984 | 2.553259027 |
| DTNA       | ENSG00000134769.21 | 1.951406519 | 4.409833943 | 1.762195106 |
| JRK        | ENSG00000234616.8  | 3.203595672 | 1.776021849 | 2.88102488  |
| CAPS       | ENSG00000105519.15 | 5.503709041 | 3.772560716 | 6.960643252 |

|            |                    |             |             |             |
|------------|--------------------|-------------|-------------|-------------|
| C1QTNF6    | ENSG00000133466.13 | 1.063659169 | 1.500965167 | 2.249945437 |
| SPRYD4     | ENSG00000176422.13 | 2.07456893  | 2.76912525  | 1.01559189  |
| PRR22      | ENSG00000212123.3  | 3.327481839 | 1.662075192 | 1.79631407  |
| ACYP2      | ENSG00000170634.12 | 2.83119238  | 2.666517125 | 3.077466767 |
| AL355488.2 | ENSG00000273373.1  | 1.253717489 | 1.089093621 | 1.04701504  |
| SLC18B1    | ENSG00000146409.10 | 5.604142379 | 4.837465193 | 3.420441455 |
| AC073842.2 | ENSG00000242798.1  | 1.418415812 | 2.532251726 | 1.687559812 |
| CYP1A1     | ENSG00000140465.13 | 2.090685123 | 3.29499849  | 3.46558115  |
| SNORD14A   | ENSG00000272034.1  | 2.825062356 | 3.045010675 | 1.484856269 |
| AL513165.1 | ENSG00000234160.1  | 4.504576351 | 2.763393245 | 1.909639237 |
| BCDIN3D    | ENSG00000186666.5  | 3.177176166 | 2.389350176 | 1.167054535 |
| SWSAP1     | ENSG00000173928.2  | 2.675724522 | 1.802220289 | 1.593456401 |
| NANOS1     | ENSG00000188613.6  | 4.706370231 | 2.776754069 | 4.747525624 |
| GALNT4     | ENSG00000257594.3  | 2.247485758 | 1.921853223 | 2.061819599 |
| FMO4       | ENSG00000076258.9  | 1.085647014 | 2.2336445   | 2.986229901 |
| AL163051.2 | ENSG00000276182.1  | 2.265892828 | 1.149692215 | 1.054149931 |
| MAP3K9     | ENSG00000006432.15 | 2.877587531 | 2.467727242 | 1.431603013 |
| ARHGAP27P1 | ENSG00000215769.8  | 2.214875101 | 2.900414204 | 1.299510236 |
| TCAF1P1    | ENSG00000223459.5  | 1.705317757 | 2.073370215 | 1.5567331   |
| KANTR      | ENSG00000232593.7  | 3.245785091 | 3.494797566 | 2.934892338 |
| CSF1       | ENSG00000184371.13 | 3.162715692 | 4.165727981 | 1.169988901 |
| AC092279.1 | ENSG00000268362.5  | 3.732315275 | 3.413535687 | 1.157902301 |
| AC015871.3 | ENSG00000278600.1  | 1.476700592 | 2.467983681 | 2.787267052 |
| C17orf97   | ENSG00000187624.8  | 2.085978784 | 1.592925418 | 2.302601759 |
| AC007611.1 | ENSG00000260086.2  | 1.63421259  | 1.214327855 | 3.42636919  |
| TFAP2A-AS1 | ENSG00000229950.1  | 1.142192124 | 3.868417904 | 2.046063534 |
| HYAL3      | ENSG00000186792.16 | 2.842467247 | 2.008928778 | 0.911287225 |
| FSD1L      | ENSG00000106701.11 | 2.128186665 | 2.364712967 | 1.364011503 |
| PLSCR4     | ENSG00000114698.14 | 1.058566011 | 3.276008576 | 2.268769231 |
| AP003068.2 | ENSG00000254614.2  | 0.995275661 | 2.368241771 | 3.776829981 |
| BRICD5     | ENSG00000182685.7  | 1.464226079 | 1.816435222 | 1.549466431 |
| NBPF19     | ENSG00000271383.6  | 1.458166629 | 1.677925802 | 0.99113463  |
| AL691432.2 | ENSG00000272106.1  | 1.901515509 | 2.152275346 | 1.336188193 |
| SOX5       | ENSG00000134532.15 | 6.97039032  | 2.905742078 | 5.101720076 |
| TMEM216    | ENSG00000187049.9  | 3.982743641 | 3.278571143 | 2.835517253 |
| AP001000.1 | ENSG00000254612.2  | 1.315871462 | 1.198162919 | 1.386567716 |
| LAMTOR5-AS | ENSG00000224699.8  | 2.172929493 | 2.270225887 | 1.628889321 |
| LPP-AS2    | ENSG00000270959.1  | 1.678260398 | 2.240749387 | 1.414284191 |
| GXYLT2     | ENSG00000172986.12 | 4.224072753 | 3.410483037 | 1.894117579 |
| NEK8       | ENSG00000160602.13 | 1.994955024 | 1.710741536 | 2.89885036  |
| DNAJC27    | ENSG00000115137.11 | 1.329023575 | 2.573357179 | 2.282873523 |
| SPATA2L    | ENSG00000158792.15 | 3.801882324 | 3.384054271 | 3.898962703 |
| BTN2A3P    | ENSG00000124549.14 | 1.158147833 | 1.884131557 | 1.607859636 |
| HOXC13     | ENSG00000123364.4  | 4.343451654 | 2.324964956 | 2.317124707 |
| RALY-AS1   | ENSG00000228265.5  | 2.050426569 | 2.924118425 | 1.238433706 |
| SSR4P1     | ENSG00000235374.2  | 1.108015332 | 1.304274941 | 3.857620281 |

|            |                    |             |             |             |
|------------|--------------------|-------------|-------------|-------------|
| SNORA33    | ENSG00000200534.1  | 3.872434136 | 2.645759974 | 1.385104067 |
| AC027097.1 | ENSG00000267040.6  | 1.557988997 | 3.130295753 | 2.241985694 |
| AL121753.2 | ENSG00000279253.1  | 1.608944185 | 1.297274012 | 1.505551465 |
| C8orf37    | ENSG00000156172.5  | 2.250416575 | 1.990837824 | 1.174634042 |
| MIEF2      | ENSG00000177427.12 | 1.270030572 | 1.489534375 | 1.396088868 |
| METTL25    | ENSG00000127720.7  | 2.227896426 | 1.962247506 | 1.60173642  |
| ZNF155     | ENSG00000204920.10 | 2.636702695 | 2.252675668 | 2.558713105 |
| DUSP19     | ENSG00000162999.12 | 1.053061162 | 2.512567308 | 2.923744554 |
| LINC01137  | ENSG00000233621.1  | 2.240881887 | 1.642892479 | 1.273638609 |
| AP001453.3 | ENSG00000257086.1  | 1.835273929 | 1.733191629 | 1.695194315 |
| IFI27L1    | ENSG00000165948.10 | 3.25115301  | 3.803904496 | 1.129303239 |
| ZNF70      | ENSG00000187792.4  | 1.439430222 | 3.345340244 | 2.808096764 |
| CBR3-AS1   | ENSG00000236830.6  | 1.78955507  | 1.576033423 | 1.433011536 |
| SRGAP2C    | ENSG00000171943.11 | 2.355868657 | 2.302856625 | 0.996243254 |
| LINC01521  | ENSG00000213888.3  | 2.826923623 | 2.354784562 | 1.899761399 |
| SCRN1      | ENSG00000136193.16 | 7.556326514 | 5.742884396 | 7.086651843 |
| SNAI2      | ENSG00000019549.9  | 3.891186103 | 7.229862047 | 1.063086599 |
| LRR8B      | ENSG00000197147.13 | 2.195855906 | 2.60012249  | 3.871696757 |
| FUOM       | ENSG00000148803.11 | 4.292287472 | 4.616626679 | 2.827875134 |
| LINC00327  | ENSG00000232977.6  | 2.33429464  | 1.258566824 | 2.780792624 |
| ZNF629     | ENSG00000102870.5  | 3.664272836 | 3.372311171 | 3.804577896 |
| TCP11L2    | ENSG00000166046.10 | 3.254006488 | 2.868356405 | 2.347359475 |
| ZNF506     | ENSG00000081665.13 | 3.567272387 | 2.897089987 | 2.920579422 |
| ELOA-AS1   | ENSG00000236810.5  | 2.70268982  | 3.143076771 | 1.857180256 |
| ZNF140     | ENSG00000196387.9  | 2.934039396 | 3.03260584  | 1.47954143  |
| VPS37D     | ENSG00000176428.5  | 1.264886624 | 2.631767162 | 2.26538303  |
| RWDD2A     | ENSG00000013392.7  | 1.475449395 | 2.098479325 | 2.102673197 |
| ZC3HAV1L   | ENSG00000146858.7  | 1.161169712 | 1.181662712 | 3.375209214 |
| PEG10      | ENSG00000242265.5  | 1.268373102 | 4.175798643 | 2.279756657 |
| LIPT1      | ENSG00000144182.16 | 2.255407854 | 2.478169957 | 3.085845714 |
| RPS6KA5    | ENSG00000100784.10 | 2.350296919 | 2.134678854 | 2.17956635  |
| RPS6KA2    | ENSG00000071242.11 | 3.521192028 | 5.429825644 | 6.479253483 |
| AL031775.1 | ENSG00000272345.1  | 1.34355662  | 0.924527244 | 1.830363582 |
| RFX2       | ENSG00000087903.12 | 3.021150993 | 1.543062203 | 1.895794269 |
| SNORD63B   | ENSG00000222937.1  | 2.394360949 | 3.063574265 | 3.747715228 |
| MEIS1      | ENSG00000143995.19 | 2.544895917 | 2.349931162 | 0.879968013 |
| ZNF141     | ENSG00000131127.13 | 3.630004523 | 2.809491971 | 3.353685471 |
| Z68871.1   | ENSG00000239407.5  | 1.845251719 | 2.293802193 | 2.054707335 |
| ZFP28      | ENSG00000196867.7  | 1.88850393  | 2.206375741 | 2.548149029 |
| DISP1      | ENSG00000154309.8  | 2.561869532 | 1.291402999 | 1.882896128 |
| AC004893.2 | ENSG00000242687.2  | 1.658307935 | 0.938198504 | 1.18190299  |
| DUSP18     | ENSG00000167065.13 | 2.309489319 | 2.53461472  | 3.542391315 |
| IRF1       | ENSG00000125347.13 | 3.06322146  | 0.968874377 | 2.885104003 |
| FGGY       | ENSG00000172456.17 | 1.331872282 | 1.736571048 | 3.018412343 |
| AC073621.1 | ENSG00000215030.5  | 2.858649449 | 1.83227452  | 2.236546637 |
| CD9        | ENSG00000010278.12 | 7.517302448 | 7.994059546 | 7.87004046  |



|              |                    |             |             |             |
|--------------|--------------------|-------------|-------------|-------------|
| RPL21P28     | ENSG00000220749.4  | 2.847950598 | 2.057476861 | 1.163040067 |
| EXD3         | ENSG00000187609.15 | 2.598100354 | 2.890196163 | 2.863317312 |
| RHOJ         | ENSG00000126785.12 | 1.93199431  | 2.89266863  | 3.174127936 |
| AC073111.5   | ENSG00000284691.1  | 1.817315422 | 1.8622724   | 3.590017903 |
| N4BP2        | ENSG00000078177.13 | 3.308128147 | 0.82192714  | 3.383587997 |
| GBP1         | ENSG00000117228.9  | 3.671340873 | 1.426598082 | 1.015389197 |
| ZNF503-AS2   | ENSG00000237149.5  | 1.985284068 | 2.800588584 | 2.956102976 |
| C19orf68     | ENSG00000185453.12 | 2.79484751  | 3.668467803 | 2.223154373 |
| GPR75        | ENSG00000119737.5  | 1.951717103 | 1.366384711 | 0.957649042 |
| LURAP1L      | ENSG00000153714.5  | 1.716040871 | 2.561972871 | 2.1958107   |
| RNF207       | ENSG00000158286.12 | 2.87110569  | 2.476034143 | 1.656512048 |
| MAFG-AS1     | ENSG00000265688.1  | 3.734294721 | 2.142836056 | 2.106212861 |
| SORBS2       | ENSG00000154556.17 | 4.57331012  | 5.267092887 | 1.051947668 |
| ARVCF        | ENSG00000099889.13 | 0.971756214 | 2.872275818 | 3.709633794 |
| ZNF48        | ENSG00000180035.12 | 2.908022693 | 1.719106397 | 2.494698072 |
| AP002990.1   | ENSG00000255508.7  | 3.225392097 | 5.965106392 | 2.914673346 |
| STON1        | ENSG00000243244.5  | 2.016284417 | 1.948696203 | 0.947639294 |
| CAPG         | ENSG00000042493.15 | 6.630621195 | 8.126791105 | 7.683999035 |
| AC068888.1   | ENSG00000257337.6  | 2.532835922 | 2.92236529  | 1.080240989 |
| AC083843.2   | ENSG00000259820.1  | 2.226390404 | 2.776457997 | 1.530101691 |
| AC067838.1   | ENSG00000272338.2  | 1.672044635 | 1.818742161 | 0.898691568 |
| RPL23AP7     | ENSG00000240356.6  | 1.083881675 | 3.359653546 | 3.180926341 |
| AC106791.1   | ENSG00000250159.6  | 2.839295817 | 1.753094432 | 3.681957052 |
| CTBP1-AS2    | ENSG00000196810.4  | 3.209902118 | 1.519468047 | 2.848115745 |
| NPPA-AS1_2   | ENSG00000278852.1  | 1.333674826 | 2.285967767 | 2.308857817 |
| RPL10P16     | ENSG00000178464.6  | 3.718088879 | 2.773738563 | 2.459969967 |
| MLYCD        | ENSG00000103150.5  | 1.529686589 | 1.782413446 | 1.997857523 |
| AC000123.2   | ENSG00000279265.1  | 2.798725344 | 2.182127561 | 2.539409818 |
| ZNF354C      | ENSG00000177932.6  | 2.391866893 | 2.646764747 | 2.537799358 |
| MIR3648-2    | ENSG00000264462.1  | 4.211474617 | 4.898559717 | 3.523549114 |
| AC073046.1   | ENSG00000235499.1  | 3.302610825 | 1.898624648 | 1.937358612 |
| AC090114.3   | ENSG00000280828.1  | 1.485250246 | 2.035489752 | 2.5849191   |
| FAM229B      | ENSG00000203778.7  | 0.931403609 | 2.610376395 | 2.944241557 |
| SNORA11F     | ENSG00000221164.1  | 3.576566161 | 1.697359669 | 2.106770966 |
| ZIK1         | ENSG00000171649.11 | 3.135527558 | 0.902180244 | 2.844457304 |
| LTBP1        | ENSG00000049323.15 | 1.550432508 | 4.146604446 | 1.018006003 |
| MFAP3L       | ENSG00000198948.11 | 1.357920514 | 4.005993291 | 4.074968987 |
| RNFT2        | ENSG00000135119.14 | 2.926535012 | 2.616808798 | 2.115052798 |
| SNORA25      | ENSG00000207112.1  | 3.158946282 | 1.729034833 | 4.507279602 |
| ZNF383       | ENSG00000188283.11 | 2.215256751 | 2.235632333 | 1.614198497 |
| ZNF433       | ENSG00000197647.11 | 2.082903757 | 1.759647499 | 2.730483765 |
| MSRB3        | ENSG00000174099.10 | 3.735355206 | 3.665825463 | 3.821588111 |
| TRAF3IP2-AS1 | ENSG00000231889.7  | 1.963892367 | 2.95193364  | 2.841702388 |
| EEF1AKMT1    | ENSG00000150456.10 | 3.095315695 | 1.032306776 | 3.236625142 |
| HEBP2        | ENSG00000051620.10 | 2.178739356 | 3.004689134 | 3.470614858 |
| PPP1R3F      | ENSG00000049769.12 | 0.861763449 | 3.54704836  | 2.15157447  |

|            |                    |             |             |             |
|------------|--------------------|-------------|-------------|-------------|
| RPS7P1     | ENSG00000263266.2  | 2.844600768 | 2.453674286 | 1.411349392 |
| SCAND2P    | ENSG00000176700.19 | 2.230281784 | 2.736889995 | 1.886454796 |
| C21orf58   | ENSG00000160298.17 | 3.819985443 | 2.934045412 | 1.339047514 |
| FTH1P8     | ENSG00000219507.4  | 1.587772902 | 1.667097621 | 1.51457101  |
| FOXD2-AS1  | ENSG00000237424.1  | 2.666925811 | 2.170027994 | 1.253682279 |
| AC004448.1 | ENSG00000189343.7  | 2.750156709 | 1.364443914 | 0.930750312 |
| REL        | ENSG00000162924.13 | 2.002966783 | 3.01297622  | 1.476046773 |
| DNMT3B     | ENSG00000088305.18 | 2.386539094 | 1.035336274 | 1.533163382 |
| SYTL4      | ENSG00000102362.15 | 2.554193484 | 3.677920526 | 3.505004834 |
| KCNIP3     | ENSG00000115041.12 | 2.538094002 | 3.59000653  | 3.333994895 |
| NPIPBA     | ENSG00000185864.16 | 2.17117931  | 3.208763333 | 3.438125414 |
| SPRY4-IT1  | ENSG00000281881.1  | 2.874618931 | 1.747084826 | 4.895352826 |
| HNRNPH2    | ENSG00000126945.8  | 6.89471904  | 5.120318863 | 5.217831123 |
| LINC00473  | ENSG00000223414.2  | 5.997616024 | 6.378730855 | 0.850174323 |
| AC104581.1 | ENSG00000179859.9  | 2.177817296 | 0.987399721 | 1.249252409 |
| GEMIN8P4   | ENSG00000228175.3  | 2.65499161  | 1.39097229  | 1.382224292 |
| PGBD4      | ENSG00000182405.5  | 2.423551545 | 2.183604179 | 1.693454854 |
| PI4KAP2    | ENSG00000183506.17 | 1.16306417  | 2.025947287 | 2.790484058 |
| CMPK2      | ENSG00000134326.11 | 2.351519797 | 2.171755298 | 2.463931476 |
| RPL7P9     | ENSG00000137970.7  | 2.48273104  | 1.632821239 | 1.154612741 |
| DYRK1B     | ENSG00000105204.13 | 4.235602451 | 4.103706925 | 2.954222401 |
| OPN3       | ENSG00000054277.13 | 2.075549645 | 2.694923306 | 2.657236926 |
| ZNF517     | ENSG00000197363.9  | 1.469009056 | 1.480411964 | 1.605806095 |
| ZNF774     | ENSG00000196391.10 | 1.488224925 | 1.200569128 | 1.033744167 |
| MAGEE1     | ENSG00000198934.4  | 0.973687533 | 2.226974481 | 1.67312515  |
| SNORD99    | ENSG00000221539.1  | 4.477395399 | 1.269694953 | 2.382163419 |
| LLGL2      | ENSG00000073350.13 | 2.16643729  | 2.711131868 | 3.981215445 |
| KIAA1211   | ENSG00000109265.13 | 3.71044264  | 4.392527777 | 4.710430836 |
| THAP2      | ENSG00000173451.6  | 2.064560294 | 1.047390905 | 1.90339814  |
| KCNAB2     | ENSG00000069424.14 | 3.36242681  | 6.314930289 | 5.84748024  |
| AP001157.1 | ENSG00000258297.1  | 1.957402372 | 1.422119623 | 2.244995894 |
| RHOQP1     | ENSG00000258568.1  | 1.367358217 | 1.211942646 | 1.365947735 |
| FCF1P2     | ENSG00000228638.1  | 2.650463736 | 1.762170917 | 2.778892796 |
| HM13-IT1   | ENSG00000235313.1  | 1.605887991 | 1.604977253 | 1.081947803 |
| ZNF846     | ENSG00000196605.7  | 0.832622227 | 2.978814155 | 2.036205201 |
| PIH1D2     | ENSG00000150773.10 | 1.933424716 | 0.929597481 | 1.796601083 |
| ZNF624     | ENSG00000197566.9  | 1.670496713 | 0.881198637 | 2.250242631 |
| JPH1       | ENSG00000104369.4  | 3.926468426 | 2.93929058  | 2.497524809 |
| WVOX       | ENSG00000186153.16 | 3.764134417 | 2.739963775 | 1.806264192 |
| C15orf61   | ENSG00000189227.5  | 2.561161562 | 1.403322524 | 2.335702697 |
| AC131009.3 | ENSG00000273568.1  | 2.555816553 | 2.525725136 | 3.908759311 |
| ZNF225     | ENSG00000256294.7  | 2.838089755 | 1.335853706 | 2.588152305 |
| STAMBPL1   | ENSG00000138134.11 | 4.825933217 | 0.839944872 | 4.829242015 |
| TSPAN5     | ENSG00000168785.7  | 3.140897613 | 0.916688186 | 6.195094521 |
| CDC42EP2   | ENSG00000149798.4  | 4.413628301 | 2.563478134 | 0.910766336 |
| CPEB1      | ENSG00000214575.9  | 1.974903431 | 5.564428533 | 4.926251228 |

|            |                    |             |             |             |
|------------|--------------------|-------------|-------------|-------------|
| ZFP14      | ENSG00000142065.13 | 1.857935722 | 1.059902057 | 2.287003532 |
| EEF1A1P6   | ENSG00000233476.3  | 2.264978978 | 1.161278848 | 1.461171871 |
| VMAC       | ENSG00000187650.3  | 2.90836036  | 3.181321887 | 3.425027122 |
| SOBP       | ENSG00000112320.11 | 3.503293689 | 2.099719345 | 1.214092822 |
| AL137058.2 | ENSG00000273784.4  | 2.458105761 | 1.135627141 | 1.840721329 |
| MCTS2P     | ENSG00000101898.5  | 3.965001861 | 2.505578609 | 3.74390639  |
| CCDC106    | ENSG00000173581.7  | 5.255211152 | 3.996662078 | 4.435726181 |
| TVP23C     | ENSG00000175106.16 | 2.861763866 | 2.165654291 | 1.03829528  |
| ENPP1      | ENSG00000197594.11 | 2.063574848 | 3.513358986 | 1.074731928 |
| LINC02381  | ENSG00000250742.2  | 4.099623939 | 2.596055365 | 0.877266102 |
| HNRNPA3P6  | ENSG00000213300.5  | 1.267912158 | 1.385030606 | 1.469391924 |
| C9orf72    | ENSG00000147894.14 | 3.869658392 | 2.462192764 | 2.779696649 |
| ZBTB3      | ENSG00000185670.7  | 2.375905349 | 2.083549905 | 1.979268103 |
| B9D2       | ENSG00000123810.7  | 3.289341148 | 0.778019401 | 2.013013003 |
| ARHGEF39   | ENSG00000137135.17 | 3.700091738 | 2.888775239 | 0.958737516 |
| CENPP      | ENSG00000188312.13 | 2.212794092 | 1.566166429 | 0.868443821 |
| AC138356.2 | ENSG00000233170.4  | 1.14461663  | 1.073189999 | 1.429500318 |
| UFSP1      | ENSG00000176125.4  | 2.535100675 | 2.644790923 | 0.821988656 |
| SH3BGR     | ENSG00000185437.13 | 1.008767763 | 2.275181173 | 3.807446605 |
| RAP1GAP    | ENSG00000076864.19 | 1.986727492 | 4.950969015 | 3.358017927 |
| FLVCR2     | ENSG00000119686.9  | 0.814617343 | 1.570478364 | 1.804598149 |
| FAM228B    | ENSG00000219626.8  | 0.975633016 | 1.874867381 | 3.533974334 |
| MPP2       | ENSG00000108852.14 | 3.287876469 | 2.908445974 | 0.912890832 |
| AGAP4      | ENSG00000188234.13 | 2.429220826 | 1.847107463 | 1.950882912 |
| EFNA5      | ENSG00000184349.12 | 3.386585263 | 0.990691546 | 4.134843152 |
| GLUD1P3    | ENSG00000250959.2  | 1.792140373 | 1.359450869 | 2.228884517 |
| MCOLN3     | ENSG00000055732.12 | 3.012101579 | 4.645637858 | 7.400638492 |
| AK4        | ENSG00000162433.14 | 4.883501478 | 3.843217664 | 1.850089679 |
| AC239868.4 | ENSG00000272993.1  | 1.613959261 | 1.650129272 | 0.991582686 |
| IKZF4      | ENSG00000123411.14 | 2.125114871 | 1.717877583 | 1.0127785   |
| ZNF653     | ENSG00000161914.9  | 3.122505754 | 1.547258868 | 2.024091312 |
| LAT        | ENSG00000213658.11 | 0.843850535 | 2.868133356 | 0.803706373 |
| Z98884.2   | ENSG00000269925.1  | 1.438731115 | 1.841718501 | 1.838794514 |
| WDR31      | ENSG00000148225.15 | 1.001160708 | 2.342144483 | 0.757707148 |
| LINC02035  | ENSG00000273033.2  | 0.985339722 | 2.789743064 | 1.056526928 |
| AC008982.2 | ENSG00000269688.1  | 1.431122282 | 2.029624637 | 1.531861308 |
| AC073861.1 | ENSG00000242299.1  | 1.952776951 | 1.612961657 | 1.294241666 |
| ZNF93      | ENSG00000184635.15 | 3.655918176 | 3.105125844 | 1.85721653  |
| AC105052.2 | ENSG00000213385.3  | 2.00448569  | 1.151824492 | 2.23258856  |
| SMG1P7     | ENSG00000261556.9  | 2.794771547 | 1.400881609 | 1.432734137 |
| MPP3       | ENSG00000161647.18 | 2.408539612 | 3.311152638 | 0.762423495 |
| HIST1H2BD  | ENSG00000158373.8  | 2.130657244 | 4.807634027 | 1.041329318 |
| SUGCT      | ENSG00000175600.15 | 1.181846509 | 2.550331294 | 2.621048942 |
| ZNF821     | ENSG00000102984.14 | 2.702627394 | 2.557471832 | 2.753403746 |
| MIR7161    | ENSG00000278571.1  | 2.11794951  | 1.453923105 | 3.152841433 |
| CADPS2     | ENSG00000081803.15 | 1.915248968 | 3.506386905 | 4.243455454 |

|              |                    |             |             |             |
|--------------|--------------------|-------------|-------------|-------------|
| AC026412.1   | ENSG00000188002.10 | 3.275657767 | 3.299541224 | 2.112705458 |
| AC005261.4   | ENSG00000268713.1  | 1.716406509 | 1.769642144 | 2.547649686 |
| TNFAIP3      | ENSG00000118503.14 | 3.010473489 | 6.426306968 | 4.332878666 |
| AL161421.1   | ENSG00000275202.1  | 1.688411367 | 2.038196952 | 1.653847245 |
| RRN3P1       | ENSG00000248124.7  | 1.127924904 | 1.152061546 | 4.104176976 |
| KCTD12       | ENSG00000178695.5  | 1.799156105 | 2.92880746  | 4.335333645 |
| AC132192.2   | ENSG00000268403.2  | 1.579447761 | 1.638945098 | 1.551919782 |
| PLEKHH2      | ENSG00000152527.13 | 2.041021273 | 4.297990673 | 3.95687746  |
| AMER1        | ENSG00000184675.9  | 2.665235885 | 1.699230696 | 0.714129623 |
| AP000873.2   | ENSG00000247137.8  | 3.819659304 | 2.468105077 | 2.340161613 |
| AC026271.1   | ENSG00000174977.8  | 1.923328234 | 2.014082184 | 1.417417336 |
| C8orf88      | ENSG00000253250.2  | 4.684007121 | 3.947690979 | 4.445200885 |
| FAM227B      | ENSG00000166262.15 | 0.7653244   | 2.068987221 | 2.987774062 |
| DEPDC4       | ENSG00000166153.16 | 1.362625354 | 1.556914852 | 1.013956061 |
| AC007382.1   | ENSG00000279519.1  | 2.120551026 | 0.743436487 | 1.542636124 |
| FLJ20021     | ENSG00000254531.1  | 1.430684993 | 1.749422711 | 3.599091357 |
| ZHX1-C8orf76 | ENSG00000259305.6  | 1.914778849 | 1.220110015 | 1.463820072 |
| MIR6821      | ENSG00000276753.1  | 1.998490914 | 2.74098991  | 2.380690266 |
| DUXAP9       | ENSG00000225210.9  | 2.703705064 | 0.750538643 | 2.509351824 |
| PATJ         | ENSG00000132849.19 | 1.846873096 | 2.882942658 | 3.595845235 |
| LINC01534    | ENSG00000225975.6  | 0.899536025 | 1.12446742  | 2.175373765 |
| CR381653.1   | ENSG00000278932.3  | 3.332432039 | 3.186939379 | 2.108854246 |
| ZNF438       | ENSG00000183621.15 | 1.735394739 | 0.690820526 | 2.964827482 |
| FAM120C      | ENSG00000184083.11 | 4.49468568  | 3.201510854 | 1.746836207 |
| FGD4         | ENSG00000139132.14 | 4.30674772  | 4.380553869 | 3.759528371 |
| STARD9       | ENSG00000159433.11 | 1.255150786 | 2.315591019 | 2.023727361 |
| CCNT2-AS1    | ENSG00000224043.7  | 1.320907011 | 1.030257875 | 0.808081958 |
| ZNF529-AS1   | ENSG00000233527.8  | 1.96010713  | 2.189190469 | 2.200015983 |
| SYP          | ENSG00000102003.10 | 1.235374794 | 3.248369825 | 1.163565175 |
| LINC00869    | ENSG00000277147.4  | 3.195602211 | 3.22722912  | 1.10506688  |
| LUM          | ENSG00000139329.4  | 0.865704851 | 6.020368576 | 2.995612933 |
| AL096870.2   | ENSG00000260669.2  | 3.09010068  | 1.695468025 | 1.93155527  |
| AC004918.3   | ENSG00000270157.1  | 1.68958365  | 2.473436968 | 2.768285005 |
| GLDC         | ENSG00000178445.9  | 4.826240064 | 3.030545021 | 2.784755562 |
| AC009053.1   | ENSG00000214331.8  | 3.45090542  | 2.079046316 | 3.106325943 |
| FTCDNL1      | ENSG00000226124.6  | 1.864874133 | 3.066260073 | 2.952170967 |
| AMIGO1       | ENSG00000181754.6  | 2.738066429 | 1.285056576 | 1.734785649 |
| AGER         | ENSG00000204305.13 | 2.08842992  | 2.698326503 | 1.811301536 |
| LINC00106    | ENSG00000236871.7  | 1.635241951 | 2.216864238 | 1.053043667 |
| AC025171.1   | ENSG00000177738.3  | 2.600402909 | 2.339493399 | 0.806855501 |
| LIPT2        | ENSG00000175536.6  | 1.931701624 | 1.074890214 | 1.503668102 |
| FAM174B      | ENSG00000185442.12 | 2.07084556  | 5.080267893 | 5.691367759 |
| ZBTB8A       | ENSG00000160062.14 | 1.911473785 | 2.115470264 | 0.629666986 |
| TPBG         | ENSG00000146242.8  | 4.186605215 | 3.022896517 | 1.10447329  |
| PER2         | ENSG00000132326.11 | 0.97218507  | 0.763645118 | 1.758472132 |
| CRIP2        | ENSG00000182809.10 | 5.994621164 | 1.743426916 | 3.492396502 |

|            |                    |             |             |             |
|------------|--------------------|-------------|-------------|-------------|
| DNAJC9-AS1 | ENSG00000227540.1  | 1.994894412 | 1.176574184 | 2.048281889 |
| JMJD7      | ENSG00000243789.10 | 1.703336473 | 1.344330662 | 1.467233033 |
| ZNF324B    | ENSG00000249471.7  | 3.110605402 | 1.963098944 | 1.284564765 |
| AC005229.4 | ENSG00000273314.1  | 2.274171925 | 2.064807489 | 0.874385843 |
| HSD11B1L   | ENSG00000167733.13 | 4.4524987   | 3.118476655 | 3.330298017 |
| FBXO34     | ENSG00000178974.9  | 4.050282147 | 3.867935045 | 3.076826278 |
| PLCG2      | ENSG00000197943.9  | 1.361377561 | 2.950805737 | 2.262361107 |
| SLC2A13    | ENSG00000151229.12 | 4.027186009 | 3.931774809 | 0.594586962 |
| MTURN      | ENSG00000180354.15 | 1.494579289 | 4.073956678 | 2.240375801 |
| RPSAP58    | ENSG00000225178.5  | 2.807279484 | 1.275139135 | 0.851217362 |
| ZKSCAN3    | ENSG00000189298.13 | 0.816417232 | 2.127173297 | 2.842829691 |
| AC010969.2 | ENSG00000269973.1  | 2.083540442 | 0.874032858 | 0.647706595 |
| SFXN2      | ENSG00000156398.12 | 3.691232915 | 2.060671812 | 1.892217294 |
| ZNF618     | ENSG00000157657.14 | 3.580798866 | 3.783940028 | 1.221799419 |
| AC120114.2 | ENSG00000260114.2  | 1.763392719 | 1.801439121 | 2.115370936 |
| LINC00920  | ENSG00000246898.1  | 0.935050961 | 2.846767705 | 4.95930319  |
| AL450326.1 | ENSG00000230555.2  | 1.745023059 | 0.877466555 | 1.806439537 |
| MIRLET7BHG | ENSG00000197182.14 | 2.766049421 | 2.718750733 | 5.421447819 |
| PRELID2    | ENSG00000186314.11 | 0.787572846 | 3.0051288   | 5.266921628 |
| AC005034.5 | ENSG00000271452.1  | 2.96600157  | 2.83294241  | 1.610874755 |
| TTLL11     | ENSG00000175764.14 | 2.418382362 | 2.370469137 | 1.637950455 |
| ZNF514     | ENSG00000144026.11 | 2.816559186 | 4.058803769 | 3.384024474 |
| AC015982.1 | ENSG00000272606.1  | 2.448928459 | 2.483402454 | 0.668024644 |
| C14orf79   | ENSG00000140104.13 | 3.324079319 | 3.583673386 | 0.803956216 |
| POU6F1     | ENSG00000184271.16 | 1.268935692 | 2.105188464 | 2.188373979 |
| MX1        | ENSG00000157601.13 | 2.792599762 | 1.980724329 | 3.62511943  |
| NPIPP1     | ENSG00000188599.17 | 4.172671379 | 2.215125561 | 1.829321345 |
| AC006504.8 | ENSG00000281468.1  | 0.964681903 | 2.441799087 | 2.914563257 |
| ASH1L-AS1  | ENSG00000235919.4  | 2.353890782 | 2.039238849 | 0.7484807   |
| ZC3H12A    | ENSG00000163874.10 | 2.208027682 | 2.024890798 | 0.925095308 |
| HAS2       | ENSG00000170961.6  | 1.173188435 | 3.428861613 | 2.702349465 |
| TMEM173    | ENSG00000184584.12 | 4.990025639 | 0.7635926   | 3.950519227 |
| PSPN       | ENSG00000125650.4  | 1.781946945 | 0.649728444 | 0.724289261 |
| TMEM170B   | ENSG00000205269.5  | 1.537575133 | 2.145641017 | 3.729454333 |
| RPPH1      | ENSG00000277209.1  | 1.087593969 | 2.465968283 | 1.653961695 |
| AC006978.1 | ENSG00000235859.5  | 0.640629531 | 2.538106305 | 2.719506256 |
| GPX8       | ENSG00000164294.13 | 4.707914474 | 5.370358651 | 0.892271987 |
| AC069499.1 | ENSG00000241634.1  | 1.174580799 | 1.277419465 | 1.730797194 |
| ITGA5      | ENSG00000161638.10 | 7.287744416 | 5.334573518 | 0.709916546 |
| GAN        | ENSG00000261609.5  | 2.011937324 | 2.271728631 | 2.288358664 |
| DNAJC28    | ENSG00000177692.11 | 0.880166273 | 1.738757021 | 2.320215282 |
| REEP2      | ENSG00000132563.15 | 4.027271182 | 2.557299834 | 3.530726487 |
| ZNF169     | ENSG00000175787.16 | 2.060557186 | 2.563332201 | 0.74043063  |
| CIB2       | ENSG00000136425.12 | 1.16996481  | 4.158369371 | 4.132769841 |
| AL135999.1 | ENSG00000258727.1  | 2.254191597 | 3.554470423 | 1.070094748 |
| AC022413.1 | ENSG00000280161.1  | 1.831637015 | 0.794683214 | 1.513113232 |

|            |                    |             |             |             |
|------------|--------------------|-------------|-------------|-------------|
| ZNF778     | ENSG00000170100.13 | 3.593941518 | 2.728647491 | 2.903925213 |
| TRDMT1     | ENSG00000107614.21 | 2.678208315 | 2.101867348 | 2.797939805 |
| AC120053.1 | ENSG00000271971.1  | 1.180281278 | 0.823859115 | 1.649056031 |
| EFCAB11    | ENSG00000140025.15 | 2.965274223 | 1.98586987  | 0.948060809 |
| AC004803.1 | ENSG00000250132.6  | 1.956180296 | 1.608234722 | 2.707595515 |
| AC068134.3 | ENSG00000251485.1  | 1.367154222 | 1.012004549 | 2.384230945 |
| AC090181.2 | ENSG00000269951.1  | 1.88426414  | 2.363184899 | 2.472479783 |
| SNORD3B-2  | ENSG00000262074.6  | 2.831796618 | 2.128958858 | 1.26123819  |
| GBAP1      | ENSG00000160766.14 | 1.763825346 | 2.365552918 | 0.858063967 |
| CCDC18     | ENSG00000122483.17 | 3.053189261 | 3.258338319 | 1.325755948 |
| AC008124.1 | ENSG00000273015.2  | 1.86797578  | 1.449419761 | 2.185016375 |
| ZFPM2-AS1  | ENSG00000251003.7  | 5.427800077 | 5.081044894 | 3.231096973 |
| HLX        | ENSG00000136630.12 | 2.066362956 | 0.704655312 | 2.428767824 |
| ZNF493     | ENSG00000196268.11 | 3.2201972   | 2.807795886 | 1.983764668 |
| ZNF887P    | ENSG00000267500.1  | 2.215037927 | 0.787832644 | 1.308834221 |
| AP001160.3 | ENSG00000269176.2  | 2.406273099 | 1.628174741 | 1.056457812 |
| AL353194.1 | ENSG00000229539.1  | 3.435901867 | 1.71388503  | 1.00900843  |
| RPL9P9     | ENSG00000237550.5  | 3.857105407 | 1.501668456 | 4.181867125 |
| AC115837.1 | ENSG00000253341.1  | 2.116070755 | 0.798078106 | 0.750140351 |
| TGFB3      | ENSG00000119699.7  | 2.826312769 | 2.035344442 | 1.121651496 |
| AL513314.2 | ENSG00000276997.4  | 1.514131422 | 1.552501913 | 2.015214466 |
| RGS2       | ENSG00000116741.7  | 4.517447019 | 2.598735668 | 0.692324865 |
| AC005726.2 | ENSG00000258472.8  | 2.042420837 | 3.038179611 | 1.043569025 |
| IBA57      | ENSG00000181873.12 | 2.795129046 | 0.619439037 | 1.564614424 |
| CD200      | ENSG00000091972.18 | 0.779707208 | 4.014583338 | 4.325339536 |
| AC006058.1 | ENSG00000261786.1  | 1.98496408  | 2.280507872 | 2.47085691  |
| ZNF684     | ENSG00000117010.15 | 2.451681089 | 1.933115605 | 1.122784499 |
| SYS1-DBNDD | ENSG00000254806.5  | 2.457096139 | 1.821548865 | 2.080014509 |
| PPM1L      | ENSG00000163590.13 | 1.521513348 | 2.722485335 | 2.205476331 |
| HELB       | ENSG00000127311.9  | 2.54739356  | 1.932379375 | 0.858132497 |
| AL136295.5 | ENSG00000259529.1  | 1.329764205 | 1.291842154 | 2.775836017 |
| PHOSPHO2   | ENSG00000144362.11 | 0.937955998 | 2.902656885 | 2.833130386 |
| GPR155     | ENSG00000163328.13 | 0.838028085 | 2.660196524 | 2.833847959 |
| AC068338.2 | ENSG00000260274.1  | 2.396713674 | 1.536006708 | 1.20686473  |
| ZNF658     | ENSG00000274349.4  | 1.842694252 | 1.970657031 | 1.374394084 |
| NBEA       | ENSG00000172915.18 | 2.463044656 | 3.292505331 | 3.278455116 |
| CRIM1      | ENSG00000150938.9  | 5.420422943 | 3.519918099 | 0.655987954 |
| ANKAR      | ENSG00000151687.14 | 1.086587789 | 0.799000549 | 2.356992926 |
| AC138035.1 | ENSG00000238035.8  | 1.653979338 | 2.252259932 | 1.751025987 |
| KIF6       | ENSG00000164627.17 | 1.612562817 | 1.539212269 | 2.570661526 |
| MST1       | ENSG00000173531.15 | 1.463478373 | 2.684495183 | 2.49995087  |
| HNRNPA1P1  | ENSG00000262333.1  | 2.380316873 | 0.984428748 | 2.213464288 |
| AL118558.3 | ENSG00000271780.1  | 2.094485992 | 2.220732446 | 0.704402536 |
| CCDC85C    | ENSG00000205476.8  | 2.006140377 | 1.737709474 | 1.15285479  |
| HSPE1-MOB4 | ENSG00000270757.1  | 0.894932748 | 2.048388594 | 1.516585689 |
| PRR16      | ENSG00000184838.14 | 0.96136738  | 0.90813475  | 0.994185714 |

|            |                    |             |             |             |
|------------|--------------------|-------------|-------------|-------------|
| AC020915.4 | ENSG00000268516.2  | 0.864201625 | 1.430999203 | 0.519851092 |
| RAPGEFL1   | ENSG00000108352.11 | 3.063881893 | 3.625555034 | 2.153920117 |
| AC068473.5 | ENSG00000274828.1  | 1.74598552  | 2.632479316 | 1.878759222 |
| AC022211.2 | ENSG00000263843.1  | 1.504481401 | 1.391983781 | 0.981173095 |
| YBX1P10    | ENSG00000213866.3  | 1.670907117 | 0.926266367 | 0.950589322 |
| ASB2       | ENSG00000100628.11 | 1.926378086 | 1.360929539 | 4.13377551  |
| TAF1A-AS1  | ENSG00000225265.1  | 0.795056732 | 1.004155247 | 1.52455251  |
| FAM72A     | ENSG00000196550.10 | 3.71733387  | 0.973145576 | 0.49742875  |
| TPK1       | ENSG00000196511.14 | 2.156562763 | 2.517036903 | 2.11334188  |
| KLHL26     | ENSG00000167487.11 | 3.454643833 | 3.062032619 | 1.7276632   |
| AL121845.3 | ENSG00000273154.3  | 1.13386207  | 2.518398119 | 2.445616755 |
| SRR        | ENSG00000167720.12 | 2.388849439 | 0.956733228 | 2.19909991  |
| AP000924.1 | ENSG00000254416.5  | 1.366384843 | 3.996578085 | 1.469251296 |
| AL133243.2 | ENSG00000276334.1  | 1.936758095 | 2.168622727 | 1.193660434 |
| RPL18AP3   | ENSG00000213442.5  | 3.185472467 | 2.508516366 | 0.956799548 |
| SERPINI1   | ENSG00000163536.12 | 0.841117148 | 3.271694604 | 4.366750153 |
| ST20-AS1   | ENSG00000259642.2  | 1.199635046 | 2.39505536  | 2.043387337 |
| NUDT11     | ENSG00000196368.4  | 2.232901974 | 3.231684253 | 0.70950878  |
| IL7        | ENSG00000104432.13 | 2.070779182 | 1.703522645 | 0.641690171 |
| ARSE       | ENSG00000157399.14 | 3.219503497 | 0.781699968 | 2.438099214 |
| ELOVL2     | ENSG00000197977.3  | 1.855933062 | 4.39547829  | 2.760414096 |
| FBXO48     | ENSG00000204923.3  | 0.581793682 | 0.605085294 | 1.654392653 |
| SMURF2P1   | ENSG00000248121.8  | 1.231242268 | 1.313779693 | 2.126803719 |
| NKRF       | ENSG00000186416.13 | 3.159024482 | 2.364409488 | 3.833982167 |
| TLE6       | ENSG00000104953.19 | 2.112247519 | 3.155936955 | 3.112599363 |
| ZNF30      | ENSG00000168661.14 | 1.941489597 | 1.558564462 | 1.343202629 |
| AL606834.2 | ENSG00000269906.1  | 1.569095831 | 2.745409963 | 2.736741148 |
| TCF7L1     | ENSG00000152284.4  | 2.11271479  | 3.412412727 | 1.856620554 |
| DACT1      | ENSG00000165617.14 | 0.51557288  | 2.016877047 | 1.903678215 |
| AP002360.1 | ENSG00000179240.9  | 2.012996462 | 1.48438101  | 1.642863556 |
| CAPN3      | ENSG00000092529.23 | 0.785089528 | 6.769800304 | 8.315541657 |
| TMEM86B    | ENSG00000180089.5  | 1.799033538 | 1.838423447 | 1.060368186 |
| ZNF542P    | ENSG00000240225.10 | 2.569394754 | 2.886380714 | 3.45374251  |
| SIRT4      | ENSG00000089163.4  | 1.285134594 | 0.888427083 | 1.069203622 |
| CYB561D1   | ENSG00000174151.14 | 2.020105363 | 1.505230091 | 2.582987415 |
| AC106886.5 | ENSG00000282034.1  | 3.463197349 | 1.879687211 | 0.93398938  |
| AC127496.7 | ENSG00000280351.2  | 1.65501807  | 0.621914414 | 2.239923714 |
| CEMIP      | ENSG00000103888.16 | 6.799832322 | 6.028596811 | 0.765079219 |
| LRIG1      | ENSG00000144749.13 | 2.294117186 | 3.596123414 | 0.544833619 |
| ZNF34      | ENSG00000196378.11 | 2.146615919 | 1.502534189 | 1.288023639 |
| INE1       | ENSG00000224975.1  | 0.922177971 | 1.951872011 | 0.833273105 |
| CBWD3      | ENSG00000196873.15 | 0.722644198 | 2.737587289 | 0.723328888 |
| AL139260.1 | ENSG00000228436.2  | 0.600724399 | 1.377240345 | 1.25624552  |
| HTR7P1     | ENSG00000183935.5  | 1.349220198 | 1.139250948 | 1.590940567 |
| CA5B       | ENSG00000169239.12 | 4.489362744 | 1.61321271  | 2.147907223 |
| RPS23P8    | ENSG00000230629.2  | 2.654988251 | 1.678134267 | 1.853020102 |

|             |                    |             |             |             |
|-------------|--------------------|-------------|-------------|-------------|
| ZNF35       | ENSG00000169981.10 | 2.715805715 | 2.296141556 | 2.95331979  |
| TSSK6       | ENSG00000178093.13 | 2.113459853 | 1.747917716 | 1.39506138  |
| LRRC27      | ENSG00000148814.17 | 2.66187865  | 2.428586516 | 1.789805889 |
| AC096887.2  | ENSG00000280417.1  | 1.122569923 | 1.857927837 | 0.536960517 |
| GAPDHP62    | ENSG00000251013.1  | 1.069705258 | 1.529061954 | 0.80397183  |
| MEX3B       | ENSG00000183496.5  | 1.928359964 | 0.585399438 | 1.042081404 |
| AC102953.2  | ENSG00000273230.1  | 3.033568068 | 4.180636375 | 0.849139065 |
| GLIPR2      | ENSG00000122694.15 | 0.547365924 | 1.83504935  | 3.368255434 |
| UBE3D       | ENSG00000118420.16 | 1.617198944 | 1.656377648 | 1.182649054 |
| MBLAC1      | ENSG00000214309.4  | 1.722207676 | 3.051449966 | 0.937974335 |
| DHRS4L2     | ENSG00000187630.15 | 3.437441851 | 1.884524519 | 1.193454634 |
| MACROD1     | ENSG00000133315.10 | 5.076424779 | 4.044156816 | 4.691807689 |
| SCAI        | ENSG00000173611.17 | 1.814895235 | 2.693872526 | 1.627513476 |
| HOXA13      | ENSG00000106031.7  | 0.93311341  | 2.071689101 | 0.719198848 |
| AC090607.2  | ENSG00000259562.2  | 0.935926895 | 2.338222952 | 2.095896591 |
| PKNOX2      | ENSG00000165495.15 | 3.440405272 | 2.901281184 | 1.113988451 |
| ASIC1       | ENSG00000110881.11 | 3.330743604 | 3.514674053 | 0.808301077 |
| AC009902.2  | ENSG00000254027.1  | 2.002483202 | 3.007804807 | 1.508636024 |
| TMEM187     | ENSG00000177854.7  | 0.95161468  | 2.010666324 | 0.655961166 |
| AC093726.1  | ENSG00000272760.1  | 1.283217978 | 0.875735267 | 2.270872735 |
| TMSB15A     | ENSG00000158164.6  | 0.8267014   | 1.599431512 | 3.005683934 |
| AC008608.2  | ENSG00000271737.1  | 1.37726533  | 1.142592666 | 0.99656763  |
| AP4S1       | ENSG00000100478.14 | 2.427187197 | 0.95626403  | 0.55742782  |
| TET1        | ENSG00000138336.8  | 1.803477783 | 0.925617854 | 0.677732488 |
| C3AR1       | ENSG00000171860.4  | 1.731477145 | 2.016025939 | 2.944899521 |
| ZNRD1ASP    | ENSG00000204623.9  | 0.710547809 | 1.685358124 | 2.726936967 |
| BOLA1       | ENSG00000178096.8  | 1.474657859 | 3.772592818 | 3.050097253 |
| SNORD63     | ENSG00000206989.1  | 1.23437111  | 1.441519736 | 3.173517078 |
| AC012146.1  | ENSG00000234327.7  | 5.648694244 | 0.71265984  | 3.282704395 |
| PTPRH       | ENSG00000080031.9  | 3.493575345 | 0.653743616 | 4.173088284 |
| GNAZ        | ENSG00000128266.8  | 1.471441495 | 1.787879498 | 0.51670518  |
| ADM5        | ENSG00000224420.3  | 3.266205231 | 2.434474094 | 1.852054286 |
| ZNF790      | ENSG00000197863.8  | 1.721887698 | 1.789969794 | 0.439098976 |
| NLGN1       | ENSG00000169760.17 | 3.38272064  | 3.405776718 | 2.163547251 |
| PALM2-AKAP  | ENSG00000157654.17 | 2.988876986 | 4.458133763 | 0.809317603 |
| ZNF268      | ENSG00000090612.20 | 2.36020947  | 1.806879922 | 1.170412751 |
| GPSM3       | ENSG00000213654.9  | 2.353048056 | 0.562954857 | 1.221663942 |
| FAM110A     | ENSG00000125898.12 | 2.220426292 | 1.632836985 | 0.856464713 |
| PPFIA4      | ENSG00000143847.15 | 2.479798211 | 1.335081123 | 0.943256126 |
| USP2        | ENSG00000036672.15 | 0.672122014 | 1.322685892 | 1.673893169 |
| AC004943.2  | ENSG00000259768.5  | 0.841511289 | 1.705030605 | 1.934173858 |
| AC004890.2  | ENSG00000244560.6  | 2.308652526 | 3.085504708 | 2.184178449 |
| AC091057.3  | ENSG00000269974.1  | 1.039954104 | 0.804436164 | 0.829081902 |
| RNF144A-AS1 | ENSG00000228203.6  | 3.406907289 | 4.566537921 | 0.674523825 |
| SEMA7A      | ENSG00000138623.9  | 4.473469507 | 3.310656867 | 0.561105782 |
| RPS28P7     | ENSG00000227097.5  | 1.987730472 | 1.576909066 | 1.071553363 |



|            |                    |             |             |             |
|------------|--------------------|-------------|-------------|-------------|
| BX679664.3 | ENSG00000244716.3  | 1.990358418 | 2.364298417 | 1.188860566 |
| CDK3       | ENSG00000250506.7  | 1.461922004 | 1.47830293  | 2.200918509 |
| AL121603.2 | ENSG00000258738.1  | 1.539628352 | 0.727795151 | 2.095455632 |
| AC083798.2 | ENSG00000272758.5  | 2.280782516 | 1.770295156 | 2.000886981 |
| ALG14      | ENSG00000172339.9  | 1.393938575 | 2.377125069 | 0.711798028 |
| AC040162.1 | ENSG00000261884.2  | 1.344590267 | 1.124956753 | 2.501652935 |
| TTYH2      | ENSG00000141540.10 | 2.069342218 | 7.110911431 | 6.546347381 |
| AL441992.1 | ENSG00000223478.1  | 3.395377885 | 4.249652255 | 0.675044901 |
| AC007191.1 | ENSG00000279407.1  | 2.040026281 | 0.538250559 | 2.10320449  |
| ANKRD34A   | ENSG00000272031.2  | 3.674411877 | 3.472664446 | 0.763753299 |
| USP49      | ENSG00000164663.14 | 0.742811282 | 0.750267443 | 1.514892094 |
| AFG1L      | ENSG00000135537.16 | 1.440436643 | 1.26277848  | 2.209859741 |
| ZNF747     | ENSG00000169955.7  | 0.408412532 | 1.396799522 | 3.21606016  |
| TSGA10     | ENSG00000135951.14 | 0.885426436 | 2.896213058 | 2.88726182  |
| SOS1-IT1   | ENSG00000229692.3  | 1.547728617 | 0.830447443 | 1.353918854 |
| TBC1D8B    | ENSG00000133138.19 | 0.984784632 | 4.471518632 | 2.822386262 |
| MMP16      | ENSG00000156103.15 | 6.275385828 | 1.540277202 | 2.94899376  |
| MIPEPP3    | ENSG00000233325.3  | 2.383808607 | 0.988314655 | 1.853981732 |
| FLT3LG     | ENSG00000090554.12 | 3.122721286 | 2.694940517 | 0.905126524 |
| MSH5-SAPCD | ENSG00000255152.8  | 1.670194439 | 2.929032689 | 1.222164342 |
| ZNF613     | ENSG00000176024.17 | 1.299018921 | 1.789294774 | 1.683819603 |
| TSPAN10    | ENSG00000182612.10 | 0.703535188 | 5.515770949 | 2.662044776 |
| ZNF547     | ENSG00000152433.14 | 1.714307619 | 1.013713737 | 2.38871624  |
| SH3BP5-AS1 | ENSG00000224660.1  | 1.401272987 | 1.719664538 | 1.604346427 |
| AC092123.2 | ENSG00000274627.1  | 1.486380502 | 1.418990663 | 2.427177033 |
| BBS12      | ENSG00000181004.9  | 2.366512296 | 2.120980443 | 1.90706942  |
| RNF208     | ENSG00000212864.3  | 2.378081474 | 2.453717503 | 3.096724759 |
| ISG20      | ENSG00000172183.14 | 5.540763499 | 4.244466728 | 2.072519559 |
| Z83843.1   | ENSG00000271533.1  | 1.240201071 | 2.247415103 | 1.241673966 |
| ZNF532     | ENSG00000074657.13 | 5.650591735 | 4.500317929 | 5.731012011 |
| AL135925.1 | ENSG00000272447.1  | 2.361244728 | 0.499871161 | 2.122432731 |
| EMB        | ENSG00000170571.11 | 4.928672212 | 3.65278335  | 1.703022485 |
| ZNF425     | ENSG00000204947.8  | 0.913804114 | 0.975261308 | 2.333139213 |
| CCDC171    | ENSG00000164989.16 | 2.06520138  | 0.993889268 | 0.821096876 |
| AC126755.1 | ENSG00000205746.9  | 0.629743975 | 1.105579883 | 1.310419337 |
| EGFL8      | ENSG00000241404.6  | 1.390726778 | 3.22047476  | 1.786734714 |
| SYNE3      | ENSG00000176438.12 | 3.281382678 | 1.145156577 | 1.705808947 |
| HR         | ENSG00000168453.14 | 6.656786752 | 6.657296784 | 2.989149659 |
| TP1P2      | ENSG00000230359.5  | 2.1168836   | 2.766276297 | 1.200202202 |
| SNORD59A   | ENSG00000207031.1  | 2.086897057 | 1.372271255 | 1.954560381 |
| GFPT2      | ENSG00000131459.12 | 5.458181158 | 0.529741318 | 4.136008853 |
| AC105285.1 | ENSG00000245213.6  | 0.907116188 | 1.026757414 | 1.401510407 |
| SNHG20     | ENSG00000234912.11 | 2.135681385 | 1.981778309 | 3.423181113 |
| DHRS12     | ENSG00000102796.10 | 1.837559393 | 3.146537585 | 3.945539955 |
| AC091271.1 | ENSG00000273702.1  | 1.705712137 | 1.363516127 | 1.125525516 |
| ZNF555     | ENSG00000186300.11 | 1.014083232 | 1.561549701 | 2.181630584 |

|            |                    |             |             |             |
|------------|--------------------|-------------|-------------|-------------|
| HNRNPCP2   | ENSG00000204253.4  | 2.266821747 | 1.04626019  | 0.681701289 |
| AC092821.3 | ENSG00000284634.1  | 3.433238523 | 3.1575939   | 3.488408457 |
| DNAJC6     | ENSG00000116675.15 | 4.596450609 | 2.404622766 | 1.311037207 |
| TMEM231    | ENSG00000205084.10 | 2.735395945 | 1.969611721 | 1.992200259 |
| DENND1B    | ENSG00000213047.12 | 2.628427571 | 1.673209757 | 2.86375263  |
| ROM1       | ENSG00000149489.8  | 3.663796273 | 0.823438034 | 1.913768963 |
| DZANK1     | ENSG00000089091.16 | 2.025915095 | 2.279130866 | 0.495905509 |
| VSIG10L    | ENSG00000186806.5  | 2.609104825 | 2.169167648 | 0.881952354 |
| TEC        | ENSG00000135605.12 | 0.711327162 | 1.818577515 | 3.219592731 |
| P2RX7      | ENSG00000089041.16 | 0.544251361 | 3.29881856  | 5.438346079 |
| CYR61      | ENSG00000142871.16 | 5.538246653 | 3.233741534 | 0.665835633 |
| CCDC122    | ENSG00000151773.12 | 2.273304994 | 0.725096919 | 3.677797515 |
| KTN1-AS1   | ENSG00000186615.10 | 2.133428698 | 1.196508616 | 1.621322527 |
| RPL9P7     | ENSG00000238103.4  | 2.568766374 | 1.248020106 | 2.574943133 |
| SEMA6A     | ENSG00000092421.16 | 2.24717126  | 6.752036813 | 1.53517162  |
| TRIP6      | ENSG00000087077.13 | 6.929348965 | 6.513436732 | 0.298821147 |
| ANO7       | ENSG00000146205.13 | 1.776764627 | 3.488807779 | 1.365868044 |
| AL354920.1 | ENSG00000254473.1  | 0.726451643 | 2.443130484 | 1.425771692 |
| ZNF814     | ENSG00000204514.9  | 5.147466365 | 2.813377299 | 3.01161319  |
| TECPR2     | ENSG00000196663.15 | 3.072229073 | 3.717291734 | 0.366202663 |
| C14orf28   | ENSG00000179476.7  | 0.529049698 | 0.863329654 | 1.292047325 |
| TEN1-CDK3  | ENSG00000261408.6  | 2.587148891 | 2.022972662 | 2.931293856 |
| TMEM169    | ENSG00000163449.10 | 1.3397042   | 2.112256513 | 1.212417319 |
| FBXO43     | ENSG00000156509.13 | 2.733663036 | 1.319545202 | 0.446252074 |
| AC242376.2 | ENSG00000274471.1  | 2.011294685 | 0.435467499 | 1.630624958 |
| MIR590     | ENSG00000207741.1  | 1.205612757 | 2.223189319 | 1.775683056 |
| OTUB2      | ENSG00000089723.9  | 2.088939826 | 1.644426858 | 0.409093622 |
| PCDH7      | ENSG00000169851.15 | 4.563381785 | 0.345044594 | 6.141931228 |
| REP15      | ENSG00000174236.3  | 2.341326302 | 1.731896752 | 0.925381104 |
| FGF2       | ENSG00000138685.13 | 4.032868579 | 2.211685017 | 4.197375026 |
| AC015813.5 | ENSG00000279069.1  | 2.215561816 | 2.265214639 | 2.353800124 |
| SEMA3C     | ENSG00000075223.13 | 5.336482602 | 4.296150721 | 4.349347881 |
| LINC01004  | ENSG00000228393.3  | 1.302645496 | 1.990837581 | 2.203661463 |
| DOPEY1     | ENSG00000083097.14 | 2.842023152 | 2.20514739  | 2.320323491 |
| PRSS23     | ENSG00000150687.11 | 6.960708385 | 4.141671945 | 0.458756781 |
| RSPH3      | ENSG00000130363.11 | 2.813114069 | 2.136913235 | 2.174865844 |
| SYDE2      | ENSG00000097096.8  | 0.644307354 | 1.1526884   | 0.969741839 |
| AC007066.2 | ENSG00000261094.2  | 1.147935921 | 1.562206968 | 1.604202985 |
| MAN2B2     | ENSG00000013288.8  | 2.928094277 | 4.308991709 | 5.175230344 |
| AL080317.1 | ENSG00000230177.1  | 1.059604541 | 2.37222612  | 1.511414602 |
| AC087741.1 | ENSG00000262580.5  | 3.812926261 | 2.784933293 | 3.003522247 |
| ZNF792     | ENSG00000180884.9  | 1.855677865 | 2.615107371 | 1.627478754 |
| ZNF678     | ENSG00000181450.17 | 1.494864718 | 0.504447213 | 1.098600216 |
| GGACT      | ENSG00000134864.10 | 0.725651834 | 2.298647906 | 2.794098736 |
| ABLIM1     | ENSG00000099204.18 | 3.348656481 | 3.204796469 | 6.942136081 |
| LIPE-AS1   | ENSG00000213904.8  | 1.545215265 | 2.941656333 | 1.671497719 |

|             |                    |             |             |             |
|-------------|--------------------|-------------|-------------|-------------|
| ALG10B      | ENSG00000175548.8  | 3.132405686 | 2.278104566 | 0.625363298 |
| Z97634.1    | ENSG00000236829.9  | 1.907216253 | 2.901052706 | 2.886547826 |
| AC130324.3  | ENSG00000275185.1  | 1.509766958 | 1.996192257 | 1.080010162 |
| OAZ3        | ENSG00000143450.16 | 0.79246549  | 2.667305483 | 1.21348927  |
| ZNF799      | ENSG00000196466.10 | 1.79365388  | 0.876548871 | 2.156424905 |
| C8orf46     | ENSG00000169085.11 | 0.401683181 | 2.884432022 | 1.597427047 |
| AC245100.8  | ENSG00000280649.2  | 2.062353352 | 2.397770639 | 1.016711523 |
| TMEM86A     | ENSG00000151117.8  | 1.760901025 | 2.600165255 | 2.139944892 |
| AGBL3       | ENSG00000146856.14 | 1.357670576 | 0.983523538 | 1.9334875   |
| RNU6-33P    | ENSG00000207524.1  | 2.273884116 | 3.390600622 | 0.449667551 |
| AC034236.1  | ENSG00000185641.6  | 2.636409985 | 0.354810527 | 1.294407359 |
| ZNF862      | ENSG00000106479.10 | 0.899700683 | 3.108641402 | 4.515546173 |
| LZTS3       | ENSG00000088899.14 | 1.493325927 | 2.929032269 | 0.384095789 |
| KLF15       | ENSG00000163884.3  | 3.348682376 | 4.709988159 | 3.72624461  |
| AL513165.2  | ENSG00000256966.6  | 2.24939674  | 1.873162758 | 1.473581255 |
| AC099343.3  | ENSG00000271646.1  | 2.020958859 | 0.658985193 | 0.698594725 |
| TBC1D2      | ENSG00000095383.19 | 1.216194654 | 2.302675247 | 3.951575274 |
| SLC6A15     | ENSG00000072041.16 | 6.430619671 | 6.107794956 | 5.352147596 |
| AP005482.3  | ENSG00000267249.1  | 0.647321835 | 1.463592667 | 0.702017179 |
| LENG8-AS1   | ENSG00000226696.5  | 2.741250767 | 1.696183609 | 3.014451217 |
| AC055811.4  | ENSG00000278864.1  | 2.465291405 | 0.512560967 | 2.086007399 |
| CDR2L       | ENSG00000109089.7  | 3.523806252 | 1.309387295 | 0.658403965 |
| AP002495.1  | ENSG00000254469.7  | 2.724320323 | 1.383262503 | 1.509130234 |
| TTC39B      | ENSG00000155158.20 | 1.651597155 | 0.663441442 | 2.246209717 |
| EGFL7       | ENSG00000172889.15 | 2.268988304 | 6.315599605 | 4.124467932 |
| AC018797.2  | ENSG00000246560.2  | 0.804825782 | 1.592979115 | 2.183078174 |
| AC064807.1  | ENSG00000228801.5  | 1.422330308 | 1.691249096 | 0.787930748 |
| EGR3        | ENSG00000179388.8  | 4.69706263  | 5.212754988 | 5.134399867 |
| AL109811.3  | ENSG00000271895.2  | 1.337124114 | 1.186914842 | 2.032084023 |
| AC012073.1  | ENSG00000271936.1  | 3.197985541 | 2.078778243 | 0.600349099 |
| JDP2        | ENSG00000140044.12 | 0.996514737 | 2.342171996 | 3.314008676 |
| RBPMS-AS1   | ENSG00000254109.5  | 0.842440588 | 2.991726894 | 0.925915928 |
| WDR17       | ENSG00000150627.15 | 2.275544281 | 2.134873811 | 2.571675398 |
| ENOX1       | ENSG00000120658.13 | 0.579106165 | 2.965954044 | 2.246779548 |
| ZNF19       | ENSG00000157429.15 | 1.08877762  | 1.116483616 | 2.208531878 |
| CEBPD       | ENSG00000221869.4  | 3.530153971 | 3.460872911 | 0.577605345 |
| RPL7P1      | ENSG00000214485.6  | 2.422165922 | 1.422694905 | 1.238194991 |
| KDM4D       | ENSG00000186280.6  | 1.878995149 | 0.465354373 | 2.083945404 |
| SPACA6      | ENSG00000182310.13 | 3.167840749 | 2.23712604  | 0.420557068 |
| ZNF628      | ENSG00000197483.9  | 2.207367313 | 0.815706706 | 1.779361253 |
| AL021707.6  | ENSG00000272669.1  | 2.121456145 | 2.368995692 | 0.779426214 |
| FOSB        | ENSG00000125740.13 | 2.803805317 | 0.882724654 | 1.214782393 |
| CAPN10-AS1  | ENSG00000260942.1  | 0.405453298 | 1.128428444 | 1.166688313 |
| GPR135      | ENSG00000181619.11 | 1.338805213 | 0.389311056 | 0.725639652 |
| PCDHB13     | ENSG00000187372.11 | 1.634411841 | 0.231259162 | 0.971248736 |
| ATP6V0E2-AS | ENSG00000204934.10 | 1.191300303 | 0.778019135 | 1.978977978 |

|             |                    |             |             |             |
|-------------|--------------------|-------------|-------------|-------------|
| LONRF3      | ENSG00000175556.16 | 3.575007977 | 4.758633436 | 4.558856754 |
| SMIM27      | ENSG00000235453.9  | 1.649281236 | 0.69081441  | 1.420912125 |
| PARD6B      | ENSG00000124171.8  | 2.045444461 | 1.554633427 | 2.761015222 |
| LPAR6       | ENSG00000139679.15 | 2.758670462 | 2.393651012 | 1.590706246 |
| C12orf60    | ENSG00000182993.3  | 1.151996309 | 2.55102127  | 2.338476131 |
| TOLLIP-AS1  | ENSG00000255153.1  | 0.9554082   | 1.297043784 | 0.679701013 |
| SLC22A17    | ENSG00000092096.16 | 0.80155567  | 3.185340649 | 0.538793758 |
| EPS8L1      | ENSG00000131037.14 | 0.491294153 | 2.85289919  | 3.250929737 |
| IL17D       | ENSG00000172458.4  | 0.906798571 | 2.211183008 | 1.740936029 |
| THAP9       | ENSG00000168152.12 | 1.372793603 | 1.47128148  | 1.058484224 |
| SLCO3A1     | ENSG00000176463.13 | 4.355028059 | 4.626625716 | 2.821600781 |
| EBLN2       | ENSG00000255423.1  | 1.158392759 | 1.277785592 | 0.630174736 |
| EPHX4       | ENSG00000172031.6  | 3.924147242 | 3.576905573 | 3.402940711 |
| RPL36A-HNR1 | ENSG00000257529.5  | 1.512016478 | 3.545238054 | 2.991551225 |
| DNHD1       | ENSG00000179532.12 | 2.845736649 | 3.592552681 | 1.229626594 |
| ZNF286B     | ENSG00000249459.8  | 2.579512584 | 1.226718914 | 0.762423335 |
| AC004918.1  | ENSG00000244701.1  | 1.283091884 | 1.85054626  | 1.155502101 |
| FLVCR1-AS1  | ENSG00000198468.7  | 2.741586933 | 0.582402076 | 2.029181348 |
| TLR6        | ENSG00000174130.12 | 2.506636652 | 2.302884473 | 4.735542281 |
| NLRP1       | ENSG00000091592.15 | 2.816969028 | 0.406390361 | 0.73313359  |
| AC009303.4  | ENSG00000279227.1  | 0.501773458 | 2.03980275  | 1.584724379 |
| ZNF583      | ENSG00000198440.9  | 0.794864664 | 0.441237617 | 0.898461003 |
| ZNF436-AS1  | ENSG00000249087.6  | 1.907594724 | 0.97882856  | 1.273711176 |
| Z99129.4    | ENSG00000279453.1  | 1.781705341 | 1.116612567 | 0.171229597 |
| ASPHD2      | ENSG00000128203.6  | 1.602680376 | 2.731164499 | 0.503839382 |
| AC120114.4  | ENSG00000279789.1  | 1.499863462 | 1.576302287 | 1.326720366 |
| DSTNP2      | ENSG00000248593.3  | 3.205817458 | 3.133070458 | 3.545151634 |
| SPATA25     | ENSG00000149634.4  | 1.155647237 | 0.909940304 | 0.704950981 |
| MAP1A       | ENSG00000166963.12 | 3.887058652 | 0.420163252 | 2.356259608 |
| AC008115.3  | ENSG00000275560.1  | 1.922430986 | 1.515562717 | 1.872087061 |
| RNU6-8      | ENSG00000202337.1  | 1.939894116 | 0.782817815 | 0.428223998 |
| FCRLB       | ENSG00000162746.14 | 2.416260716 | 1.928813715 | 0.424834836 |
| AL162377.1  | ENSG00000231856.2  | 0.512021424 | 0.566744522 | 0.959699542 |
| ADAMTS7     | ENSG00000136378.14 | 1.039770612 | 1.567052877 | 2.143167677 |
| PSMG3-AS1   | ENSG00000230487.7  | 0.729891427 | 4.215400259 | 1.368432496 |
| AL512625.1  | ENSG00000170161.6  | 3.553748529 | 1.669753846 | 0.532854773 |
| CFAP69      | ENSG00000105792.19 | 1.02202586  | 1.645665308 | 0.774409481 |
| DOK3        | ENSG00000146094.13 | 2.858942058 | 2.122501364 | 0.95278719  |
| AC092902.2  | ENSG00000241288.7  | 1.661791507 | 1.668338861 | 0.578776496 |
| PPP1R26     | ENSG00000196422.10 | 4.224623973 | 5.386084159 | 5.244875884 |
| AC068724.1  | ENSG00000205871.5  | 1.763921541 | 0.968940507 | 0.98456413  |
| AL645568.1  | ENSG00000203739.3  | 0.973897441 | 0.93089362  | 0.618581893 |
| LRRC29      | ENSG00000125122.15 | 2.003082767 | 1.848987405 | 1.647262672 |
| MAST4       | ENSG00000069020.18 | 1.462930412 | 2.177596571 | 2.683188467 |
| CDKL5       | ENSG00000008086.11 | 0.653848043 | 1.144377221 | 3.06272046  |
| SNX24       | ENSG00000064652.10 | 4.759162829 | 4.460068344 | 0.503385804 |

|             |                    |             |             |             |
|-------------|--------------------|-------------|-------------|-------------|
| NFYC-AS1    | ENSG00000272145.1  | 1.016774914 | 0.722320938 | 0.489195032 |
| AC093484.4  | ENSG00000265401.1  | 0.899124852 | 0.433172797 | 0.798980158 |
| AC002546.1  | ENSG00000267194.1  | 2.071598468 | 0.626875013 | 2.96681473  |
| APOC1       | ENSG00000130208.9  | 2.530019618 | 0.499839473 | 8.934613092 |
| AC011468.5  | ENSG00000275055.1  | 1.167648053 | 0.982126492 | 0.930916721 |
| SCARNA12    | ENSG00000238795.1  | 2.379396199 | 2.21841822  | 1.542671837 |
| MELTF       | ENSG00000163975.11 | 7.109001246 | 6.761835462 | 4.286102637 |
| SRGAP1      | ENSG00000196935.8  | 1.258729685 | 2.200275412 | 3.434907254 |
| IL4R        | ENSG00000077238.13 | 2.564181441 | 2.82174683  | 0.289353413 |
| GDPGP1      | ENSG00000183208.12 | 1.012951526 | 1.738136761 | 2.03886018  |
| AC135048.1  | ENSG00000261487.1  | 1.976792761 | 2.304748891 | 1.694828435 |
| SMO         | ENSG00000128602.9  | 4.677318392 | 5.361817738 | 5.154024805 |
| ZNF784      | ENSG00000179922.5  | 2.287393142 | 0.427583268 | 1.747616185 |
| AC132938.3  | ENSG00000265458.1  | 2.596399342 | 0.600356163 | 1.155161987 |
| AC007114.1  | ENSG00000263004.1  | 0.486508219 | 1.552423186 | 2.494079208 |
| FAM149A     | ENSG00000109794.13 | 0.784125989 | 2.441648599 | 3.293699957 |
| ARHGEF28    | ENSG00000214944.9  | 3.469956275 | 1.361434715 | 2.700399667 |
| FAM53A      | ENSG00000174137.12 | 0.914112672 | 0.61671225  | 2.66878342  |
| LINC01588   | ENSG00000214900.9  | 0.504152176 | 2.46663465  | 2.531298956 |
| ARSJ        | ENSG00000180801.13 | 3.707940124 | 0.284542141 | 0.356508786 |
| IDH1-AS1    | ENSG00000231908.1  | 0.17631123  | 1.786908787 | 1.090550224 |
| AL445250.1  | ENSG00000225096.2  | 1.506676169 | 2.148159075 | 1.061953011 |
| TTC25       | ENSG00000204815.9  | 2.88039257  | 2.27179103  | 0.981133569 |
| MRC2        | ENSG00000011028.13 | 5.83763341  | 5.821005893 | 4.304647967 |
| C19orf73    | ENSG00000221916.3  | 1.15970781  | 1.047091407 | 0.952561994 |
| SLC22A23    | ENSG00000137266.14 | 0.48857342  | 4.091350954 | 2.859442437 |
| GTF2IP12    | ENSG00000283050.1  | 0.73681615  | 1.577660261 | 0.972803508 |
| ZNF888      | ENSG00000213793.5  | 2.053682123 | 1.701426341 | 1.756122555 |
| AC005726.4  | ENSG00000264608.1  | 1.285581347 | 2.061724085 | 0.918699931 |
| RNF122      | ENSG00000133874.1  | 0.383222411 | 1.880076739 | 1.582392869 |
| LRTOMT      | ENSG00000184154.13 | 2.450662747 | 0.993207111 | 2.856075037 |
| CYP2U1      | ENSG00000155016.17 | 0.462115594 | 3.758478502 | 4.511179351 |
| ZNF253      | ENSG00000256771.3  | 2.738901172 | 1.444368763 | 1.396348126 |
| MXD1        | ENSG00000059728.10 | 2.231132694 | 2.189395162 | 1.658328226 |
| MZF1-AS1    | ENSG00000267858.5  | 2.969808195 | 1.398571306 | 1.3610402   |
| RANBP17     | ENSG00000204764.13 | 2.622906614 | 2.464987296 | 0.460225293 |
| NFATC1      | ENSG00000131196.17 | 2.605338937 | 4.030269316 | 2.943089336 |
| AC012313.10 | ENSG00000279611.1  | 1.360111856 | 0.821840418 | 1.628107681 |
| ZBTB42      | ENSG00000179627.9  | 1.969058854 | 1.440705641 | 0.263642876 |
| TDRKH-AS1   | ENSG00000203288.3  | 1.558420574 | 0.945971685 | 1.567849058 |
| RPL21P75    | ENSG00000213860.4  | 2.257552387 | 1.46303633  | 0.915332325 |
| PARD6A      | ENSG00000102981.9  | 1.998261571 | 0.937279685 | 1.787854639 |
| RPL41P2     | ENSG00000256338.2  | 1.911458157 | 1.148612183 | 0.41474413  |
| ZNF525      | ENSG00000203326.11 | 2.058182991 | 2.781387397 | 2.202366892 |
| CCDC183-AS1 | ENSG00000228544.1  | 2.11878071  | 1.489303974 | 2.42587535  |
| LINC00526   | ENSG00000264575.1  | 0.645643277 | 1.402685121 | 1.068534499 |

|             |                    |             |             |             |
|-------------|--------------------|-------------|-------------|-------------|
| CCDC69      | ENSG00000198624.12 | 1.801931419 | 0.359217147 | 2.208125696 |
| L3MBTL1     | ENSG00000185513.14 | 0.64098113  | 3.797507831 | 3.282906998 |
| AC010618.3  | ENSG00000269439.5  | 3.289434769 | 2.948596085 | 2.317742304 |
| GTF2IP13    | ENSG00000272556.2  | 0.283098691 | 1.273598884 | 1.465326425 |
| CSGALNACT1  | ENSG00000147408.14 | 5.126619975 | 3.399186594 | 4.442472994 |
| COBLL1      | ENSG00000082438.15 | 2.54902882  | 2.685622756 | 4.135764812 |
| ZNF300      | ENSG00000145908.12 | 3.645954826 | 3.247860183 | 1.968748272 |
| RAB11B-AS1  | ENSG00000269386.5  | 2.471848318 | 1.897610515 | 0.720515076 |
| COLGALT2    | ENSG00000198756.10 | 2.130275975 | 3.656258009 | 4.039284336 |
| AL353743.1  | ENSG00000165121.11 | 1.982961967 | 1.966609104 | 1.563686197 |
| ATP11C      | ENSG00000101974.14 | 4.320298094 | 4.814527109 | 3.601395286 |
| AC090589.3  | ENSG00000270060.1  | 1.210616188 | 1.131215772 | 1.284990183 |
| GMDS-AS1    | ENSG00000250903.8  | 0.914779073 | 1.463554765 | 2.038203358 |
| CYP27B1     | ENSG00000111012.9  | 4.054723398 | 0.83864585  | 2.262958004 |
| DACT3       | ENSG00000197380.10 | 0.128956506 | 1.80100295  | 2.675959129 |
| SGMS2       | ENSG00000164023.14 | 0.31891337  | 2.353550661 | 2.230304228 |
| ETV2        | ENSG00000105672.14 | 0.801353821 | 1.629745579 | 2.238665695 |
| AC087501.5  | ENSG00000271851.1  | 0.434089324 | 0.796693622 | 1.856326729 |
| AL358472.4  | ENSG00000282386.1  | 1.460852326 | 1.538410964 | 0.302561945 |
| AP003392.4  | ENSG00000255121.2  | 3.434543981 | 0.939217589 | 0.361899153 |
| ARHGAP27    | ENSG00000159314.11 | 2.828983314 | 3.355135928 | 3.235113725 |
| ETFBKMT     | ENSG00000139160.13 | 0.788609282 | 0.780597436 | 0.295312711 |
| NR4A3       | ENSG00000119508.17 | 0.299735981 | 6.857485623 | 2.327672471 |
| C1QL4       | ENSG00000186897.4  | 0.711468318 | 2.664475399 | 0.468445569 |
| SPIN2B      | ENSG00000186787.8  | 1.812818827 | 2.130817071 | 1.777067655 |
| AC134772.2  | ENSG00000282827.2  | 1.508686841 | 0.857579474 | 0.479768124 |
| UBE2Q2P1    | ENSG00000189136.8  | 0.648443271 | 1.970841243 | 2.00082115  |
| FAM86C2P    | ENSG00000160172.10 | 2.529559265 | 2.298712912 | 0.452403698 |
| AP005329.3  | ENSG00000272688.1  | 1.526774786 | 2.876116393 | 2.495617507 |
| STX16-NPEPL | ENSG00000254995.4  | 1.624358455 | 1.290349562 | 4.004274456 |
| FLRT2       | ENSG00000185070.10 | 1.818421482 | 1.838408199 | 0.803358071 |
| PCDHB15     | ENSG00000113248.5  | 1.272458922 | 0.297564073 | 0.516059192 |
| FAM229A     | ENSG00000225828.1  | 2.729566934 | 2.662079138 | 0.344772815 |
| AC005696.1  | ENSG00000262050.1  | 0.619844932 | 0.980209914 | 1.979732107 |
| EFNB3       | ENSG00000108947.4  | 2.509033907 | 1.755032998 | 0.229157398 |
| SNORA71A    | ENSG00000225091.3  | 2.419602649 | 2.172572558 | 0.760787788 |
| SNORD46     | ENSG00000200913.1  | 2.778149512 | 1.742950375 | 0.976328537 |
| FXYD3       | ENSG00000089356.18 | 6.967227962 | 3.758229481 | 7.853245441 |
| CADM4       | ENSG00000105767.2  | 6.985782013 | 3.682887696 | 6.291158292 |
| HDX         | ENSG00000165259.13 | 1.221167976 | 1.243340099 | 1.385794197 |
| CYP2J2      | ENSG00000134716.9  | 1.909298259 | 3.633394903 | 2.65384909  |
| MAST1       | ENSG00000105613.9  | 0.479961532 | 3.834846323 | 3.580720134 |
| SPRY4-AS1   | ENSG00000231185.6  | 3.621618401 | 2.158819827 | 3.236164552 |
| ALMS1-IT1   | ENSG00000230002.2  | 1.571934297 | 1.602102121 | 2.347062199 |
| CHKB-AS1    | ENSG00000205559.3  | 0.972594483 | 1.960010716 | 1.46377127  |
| FLJ37453    | ENSG00000179743.4  | 1.6078896   | 0.682389495 | 0.338772682 |

|            |                    |             |             |             |
|------------|--------------------|-------------|-------------|-------------|
| SRGN       | ENSG00000122862.4  | 2.936839684 | 3.370880812 | 0.737731734 |
| SNORA3B    | ENSG00000212607.1  | 2.585992916 | 1.966431193 | 1.698000507 |
| ZBED6      | ENSG00000257315.2  | 4.612449151 | 4.181696723 | 1.722680905 |
| KLF2       | ENSG00000127528.5  | 2.937289582 | 2.329159177 | 0.858206758 |
| HIST1H1E   | ENSG00000168298.6  | 2.606351204 | 1.813626332 | 0.5781126   |
| MGLL       | ENSG00000074416.13 | 4.099687176 | 3.49187002  | 0.643027484 |
| AC107375.1 | ENSG00000259891.1  | 0.665744248 | 0.682362771 | 0.858753965 |
| ARID5A     | ENSG00000196843.15 | 1.259261935 | 2.756221009 | 0.320476473 |
| PDGFRL     | ENSG00000104213.12 | 1.568445327 | 3.922546061 | 0.748246098 |
| AZIN1-AS1  | ENSG00000253320.5  | 0.54511847  | 0.958847824 | 2.127683598 |
| SNORA71C   | ENSG00000201512.1  | 2.660909635 | 1.667346646 | 1.869770165 |
| RN7SL81P   | ENSG00000244218.3  | 0.459179614 | 3.254613038 | 2.130765404 |
| GBP3       | ENSG00000117226.11 | 0.370357825 | 3.997182404 | 2.82136071  |
| AC079922.2 | ENSG00000237753.1  | 0.093733361 | 1.72652368  | 0.849177658 |
| VGF        | ENSG00000128564.6  | 6.336806607 | 9.679697914 | 5.368967164 |
| UBAC2-AS1  | ENSG00000228889.6  | 1.33276568  | 2.403769999 | 0.918647533 |
| ZNF66      | ENSG00000160229.11 | 1.906777477 | 1.17167672  | 0.26237234  |
| MIR6807    | ENSG00000275924.1  | 2.049102495 | 1.509045195 | 0.728948477 |
| AC026740.1 | ENSG00000271781.1  | 1.473163241 | 0.906852944 | 0.842875425 |
| SPAG4      | ENSG00000061656.9  | 1.913022658 | 0.743762747 | 2.376508937 |
| TMPO-AS1   | ENSG00000257167.2  | 3.150833127 | 0.692994537 | 0.174647477 |
| PROSER2    | ENSG00000148426.12 | 3.30300074  | 3.724894049 | 3.631964433 |
| AL928654.2 | ENSG00000251602.6  | 2.030825981 | 1.889955926 | 0.459729168 |
| AC239868.2 | ENSG00000261716.1  | 0.997241637 | 1.434750504 | 0.199806967 |
| SLC25A45   | ENSG00000162241.12 | 3.02063806  | 2.459210905 | 0.277248551 |
| PCAT6      | ENSG00000228288.6  | 2.580271695 | 2.989614186 | 0.830838796 |
| COL9A2     | ENSG00000049089.13 | 4.016299291 | 4.100665923 | 3.743427655 |
| LTBP4      | ENSG00000090006.17 | 5.907866574 | 5.822416768 | 5.045195623 |
| DDX11-AS1  | ENSG00000245614.3  | 1.070828366 | 0.868993651 | 0.815258352 |
| AC026979.3 | ENSG00000271869.1  | 0.676807524 | 1.469465465 | 1.963191889 |
| AL161935.3 | ENSG00000237797.1  | 2.193375027 | 0.616408484 | 3.714509938 |
| TMEM136    | ENSG00000181264.8  | 2.722521428 | 0.773193409 | 1.957094468 |
| AL596094.1 | ENSG00000272764.1  | 1.363744342 | 1.090349564 | 0.40275477  |
| AL441883.1 | ENSG00000261071.1  | 0.641387653 | 1.665362618 | 0.380514151 |
| AP000580.1 | ENSG00000219529.2  | 3.174334139 | 3.301925387 | 3.028538732 |
| AC016727.1 | ENSG00000270820.5  | 0.803855055 | 2.562944157 | 0.68876687  |
| RPS10P7    | ENSG00000223396.3  | 1.135418849 | 0.243802477 | 2.085455894 |
| AC106782.2 | ENSG00000260219.2  | 1.852178221 | 0.625342588 | 0.294531962 |
| ELOCP19    | ENSG00000241975.1  | 0.211563922 | 1.262842069 | 1.099321783 |
| COBL       | ENSG00000106078.17 | 3.279238228 | 3.894648901 | 2.775997942 |
| NFIA       | ENSG00000162599.15 | 2.605510679 | 2.484839679 | 2.10367733  |
| LAMB3      | ENSG00000196878.14 | 3.862348943 | 0.789567883 | 2.092135494 |
| AC012676.5 | ENSG00000280063.1  | 1.984001185 | 2.029628494 | 1.612816491 |
| SPATA7     | ENSG00000042317.16 | 0.996699616 | 1.653463052 | 0.855525829 |
| CERS4      | ENSG00000090661.11 | 3.172741663 | 3.721529107 | 2.435769473 |
| ZNF565     | ENSG00000196357.11 | 1.459484197 | 1.43534236  | 1.52350026  |

|            |                    |             |             |             |
|------------|--------------------|-------------|-------------|-------------|
| MMACHC     | ENSG00000132763.14 | 4.199629007 | 0.090173584 | 3.31101819  |
| AC122688.3 | ENSG00000279233.1  | 0.373088948 | 0.327427562 | 1.46553626  |
| ZNF850     | ENSG00000267041.5  | 1.209206054 | 2.794102991 | 0.117853301 |
| PROCR      | ENSG00000101000.5  | 5.493460431 | 6.396298214 | 4.99423994  |
| RALGPS1    | ENSG00000136828.18 | 0.554649277 | 1.090625186 | 3.374941859 |
| AC108488.1 | ENSG00000242282.6  | 3.146819751 | 2.023858264 | 0.166756271 |
| AC113935.1 | ENSG00000226084.5  | 1.877856943 | 2.051368976 | 1.017708836 |
| HNRNPA1P48 | ENSG00000224578.4  | 4.492044516 | 2.659631522 | 2.698956384 |
| CORO2A     | ENSG00000106789.12 | 2.855628771 | 3.24049377  | 1.394021242 |
| C2orf72    | ENSG00000204128.5  | 0.5916928   | 1.622351963 | 1.662098817 |
| HNRNPA1P7  | ENSG00000215492.6  | 2.71614334  | 0.788917628 | 0.807582491 |
| HSPA1L     | ENSG00000204390.9  | 0.147669869 | 1.715779615 | 2.12327516  |
| SNORA66    | ENSG00000207523.1  | 1.893985987 | 1.910289747 | 0.709772135 |
| PDZD4      | ENSG00000067840.12 | 1.419770961 | 3.459981378 | 3.150665879 |
| AC007038.2 | ENSG00000272807.1  | 1.024034933 | 2.034744093 | 1.807007287 |
| DEPTOR     | ENSG00000155792.9  | 3.088046394 | 2.546161351 | 2.589090497 |
| PTK2B      | ENSG00000120899.17 | 1.231970061 | 1.749955247 | 2.285286149 |
| DNAJC3-AS1 | ENSG00000247400.3  | 1.764702202 | 0.84658702  | 1.78933646  |
| NEK3       | ENSG00000136098.16 | 0.375036881 | 1.777349592 | 3.883769649 |
| ZSCAN18    | ENSG00000121413.12 | 1.357242334 | 2.094005785 | 1.199101775 |
| AC025181.2 | ENSG00000272086.1  | 0.733935645 | 1.494157125 | 1.295066332 |
| AC092910.3 | ENSG00000242622.1  | 1.412058188 | 1.232706794 | 1.285421514 |
| AL035461.2 | ENSG00000275632.1  | 3.02533292  | 1.690774767 | 0.411314227 |
| MIPOL1     | ENSG00000151338.18 | 1.961390251 | 1.602495722 | 2.378360231 |
| AC025857.2 | ENSG00000269899.1  | 0.625445819 | 2.46983096  | 6.800458035 |
| DNAAF4     | ENSG00000256061.7  | 3.057854454 | 3.120604552 | 2.131260034 |
| BEST1      | ENSG00000167995.15 | 0.88296584  | 4.436524034 | 5.665915589 |
| SNORD125   | ENSG00000239127.1  | 2.812692251 | 2.88614445  | 1.815675467 |
| AC004922.1 | ENSG00000284292.1  | 6.346263877 | 7.234930063 | 0.392634222 |
| JHDM1D-AS1 | ENSG00000260231.1  | 2.274803074 | 1.406678266 | 2.191898259 |
| NR6A1      | ENSG00000148200.16 | 0.553663764 | 2.462647526 | 0.196503774 |
| VAX2       | ENSG00000116035.2  | 1.516519274 | 1.80181978  | 0.188449412 |
| AC016026.1 | ENSG00000093100.13 | 0.667456484 | 2.229116668 | 0.897473134 |
| AL161772.1 | ENSG00000278291.1  | 2.44199531  | 2.656176139 | 2.364328449 |
| CROCCP3    | ENSG00000080947.14 | 0.975558198 | 1.526303195 | 2.157322245 |
| AL354740.1 | ENSG00000225339.3  | 1.774654188 | 1.29735026  | 0.21952029  |
| AC107918.4 | ENSG00000284610.1  | 1.317777389 | 3.340866797 | 4.363806601 |
| POLR2J2    | ENSG00000267645.5  | 2.504225812 | 1.70529636  | 3.287644472 |
| ATP1A1-AS1 | ENSG00000203865.9  | 0.560096879 | 0.958714757 | 0.579012038 |
| AC064836.3 | ENSG00000273456.1  | 0.843633722 | 1.967595956 | 2.425370824 |
| MECOM      | ENSG00000085276.17 | 2.416753562 | 2.72967273  | 3.028676731 |
| ST6GALNAC2 | ENSG00000070731.10 | 0.540279994 | 4.124325618 | 5.814028732 |
| RPS24P8    | ENSG00000224094.1  | 2.746272683 | 0.378494969 | 1.355425641 |
| DPYSL3     | ENSG00000113657.12 | 4.842891882 | 4.15873976  | 5.040988483 |
| ZHX2       | ENSG00000178764.7  | 2.23959714  | 2.278081905 | 1.829133608 |
| SNORD68    | ENSG00000200084.1  | 4.054124998 | 3.735223836 | 1.596187948 |



|             |                    |             |             |              |
|-------------|--------------------|-------------|-------------|--------------|
| PCDHGA6     | ENSG00000253731.2  | 0.724625064 | 0.210767444 | 0.405439063  |
| AC107068.1  | ENSG00000259959.1  | 2.280489383 | 0.467451091 | 1.719675834  |
| AURKAPS1    | ENSG00000213033.4  | 1.425268776 | 0.333540881 | 2.130898214  |
| AC074143.1  | ENSG00000265690.7  | 0.469764301 | 1.489096721 | 2.177221214  |
| NPTN-IT1    | ENSG00000281183.1  | 0.21212765  | 0.845440003 | 1.095384628  |
| AC241585.2  | ENSG00000272419.6  | 3.163139241 | 3.394206836 | 2.656706238  |
| EN2         | ENSG00000164778.4  | 4.348207311 | 5.805945797 | 0.535919776  |
| AC026403.1  | ENSG00000229119.3  | 2.357677608 | 1.095452467 | 2.114197436  |
| SNORA72     | ENSG00000207067.1  | 2.407399838 | 1.485441086 | 0.401208776  |
| DENND3      | ENSG00000105339.10 | 2.507327332 | 0.485789028 | 3.231892852  |
| ZNF418      | ENSG00000196724.12 | 0.697571258 | 1.425853052 | 0.560795318  |
| LINC02482   | ENSG00000251580.1  | 2.358499161 | 0.162260974 | 3.588406239  |
| RPP25       | ENSG00000178718.6  | 5.434227122 | 5.895475378 | 0.246379389  |
| BTG2        | ENSG00000159388.5  | 3.498629464 | 3.696407611 | 3.918497781  |
| AC006449.6  | ENSG00000277969.1  | 1.558074846 | 0.971760565 | 1.653976409  |
| AC104506.1  | ENSG00000273204.1  | 1.42056672  | 0.317143415 | 0.278950967  |
| AC048344.4  | ENSG00000277342.1  | 1.958120955 | 1.302717602 | 1.427459844  |
| HOXB8       | ENSG00000120068.6  | 4.569555697 | 2.01267616  | 3.430648363  |
| AC009237.3  | ENSG00000229689.3  | 2.377155765 | 0.532458181 | 2.134744303  |
| METTL27     | ENSG00000165171.10 | 4.546673736 | 2.423128874 | 0.847602274  |
| FOXN3-AS1   | ENSG00000258920.1  | 0.822005565 | 0.182462789 | 0.60746295   |
| AC017100.1  | ENSG00000259985.1  | 2.617019268 | 2.370081675 | 2.981557103  |
| CHST2       | ENSG00000175040.5  | 3.932279565 | 4.790888304 | -0.023946928 |
| NCR3LG1     | ENSG00000188211.8  | 3.102997908 | 3.192837521 | 1.004927592  |
| NAP1L4P1    | ENSG00000177173.5  | 0.726327184 | 1.720026258 | 2.594138147  |
| GRAMD1B     | ENSG00000023171.16 | 7.641499482 | 5.507182058 | 2.052886234  |
| ICAM5       | ENSG00000105376.4  | 3.857346692 | 3.908430556 | 2.185865326  |
| SENP8       | ENSG00000166192.14 | 0.593858059 | 0.055005662 | 0.755552806  |
| ZNF443      | ENSG00000180855.15 | 2.366977917 | 0.993387508 | 2.2747725    |
| C2orf81     | ENSG00000284308.1  | 3.656471016 | 1.130321782 | 0.498470432  |
| ICA1L       | ENSG00000163596.16 | 1.599550789 | 1.093440374 | 3.050492233  |
| FAM161B     | ENSG00000156050.8  | 1.819056453 | 0.321123284 | 2.308706557  |
| 43893       | ENSG00000173926.5  | 0.296153413 | 1.11888568  | 4.020294338  |
| ZNF345      | ENSG00000251247.10 | 0.843665078 | 1.004473499 | 1.349908662  |
| UBA7        | ENSG00000182179.12 | 2.523778845 | 3.052402042 | 0.333662152  |
| FAM212B     | ENSG00000197852.9  | 4.232227396 | 1.579880673 | 1.926899184  |
| AL158152.1  | ENSG00000269929.1  | 1.460850839 | 1.783787124 | 1.023325557  |
| FBXL19-AS1  | ENSG00000260852.1  | 1.785194755 | 2.162082086 | 1.236441743  |
| OSR2        | ENSG00000164920.9  | 1.610474636 | 0.110257147 | 0.75078937   |
| IQCJ-SCHIP1 | ENSG00000283154.2  | 5.347817433 | 3.799082774 | 2.976213963  |
| AC139768.1  | ENSG00000278126.1  | 0.487195995 | 1.282080606 | 1.505694152  |
| AL928921.2  | ENSG00000284693.1  | 0.561058839 | 0.435209153 | 0.383988116  |
| HCN2        | ENSG00000099822.2  | 0.346094213 | 4.031045492 | 4.835333716  |
| PDGFRA      | ENSG00000134853.11 | 1.903526434 | 0.807441842 | 0.840765667  |
| BAHCC1      | ENSG00000266074.8  | 3.890018587 | 4.613019414 | 5.884715017  |
| HMG1N1P36   | ENSG00000235734.4  | 0.623468469 | 0.257886386 | 0.218764621  |

|            |                    |             |              |              |
|------------|--------------------|-------------|--------------|--------------|
| AL121906.2 | ENSG00000275223.1  | 0.721771177 | 1.268219679  | 1.557991121  |
| SAPCD1     | ENSG00000228727.8  | 2.333024779 | 3.070400561  | 1.740145392  |
| TBC1D8-AS1 | ENSG00000272902.2  | 0.159319356 | 0.831041218  | 0.917913912  |
| RBMS3      | ENSG00000144642.21 | 3.930735188 | 0.460490759  | 2.440888162  |
| FST        | ENSG00000134363.11 | 7.4654621   | 2.537756191  | 1.360282692  |
| AL022328.4 | ENSG00000273253.2  | 0.954307368 | 1.258948642  | 2.757711094  |
| HMGB1P10   | ENSG00000213707.2  | 2.633052482 | 1.081771299  | 0.50369722   |
| CCDC78     | ENSG00000162004.16 | 2.894685939 | 4.561467405  | 4.473339066  |
| AC105202.1 | ENSG00000247317.3  | 2.756704367 | 3.325422409  | 2.847244013  |
| AC005839.1 | ENSG00000279089.1  | 0.601680076 | 0.563627731  | 1.411120357  |
| ZRANB3     | ENSG00000121988.17 | 2.31983147  | 3.090201891  | 0.746370281  |
| AC133552.6 | ENSG00000275494.1  | 0.611665068 | 1.137864266  | 1.364534389  |
| ADAM11     | ENSG00000073670.13 | 1.631890493 | 3.251407004  | 0.645665742  |
| CEP126     | ENSG00000110318.13 | 1.670213459 | 0.752818188  | 1.21101862   |
| ZNF709     | ENSG00000242852.6  | 1.649316278 | 0.336356146  | 1.479129498  |
| TM4SF1     | ENSG00000169908.11 | 6.917615141 | 2.511016214  | 1.097691078  |
| GSDMB      | ENSG00000073605.18 | 1.43379421  | 3.081663202  | 0.561884057  |
| AC008393.1 | ENSG00000245317.2  | 0.630402348 | 0.135035207  | 0.989619079  |
| GOLGA2P7   | ENSG00000225151.10 | 1.305809358 | 1.266611155  | 2.778350863  |
| AC243964.3 | ENSG00000279095.1  | 2.974540963 | 1.208682069  | 0.550182432  |
| TIPARP-AS1 | ENSG00000243926.1  | 1.384987425 | 1.295121604  | 0.861070845  |
| AC098487.1 | ENSG00000248161.5  | 0.878168127 | 0.625939595  | 0.504248309  |
| AC090114.2 | ENSG00000273270.1  | 1.089082861 | 1.197667176  | 1.893329646  |
| AP003108.2 | ENSG00000256591.5  | 3.26345618  | 0.929528721  | 1.803882187  |
| GPR176     | ENSG00000166073.10 | 4.203830843 | 1.930564365  | 2.02004163   |
| ANXA1      | ENSG00000135046.13 | 10.0955134  | 2.615188289  | 0.395509326  |
| LRRC46     | ENSG00000141294.9  | 1.833721106 | -0.067144254 | 1.573239965  |
| FLJ27354   | ENSG00000231999.6  | 0.027857193 | 1.113744093  | 3.488614529  |
| CBS        | ENSG00000160200.17 | 0.835369311 | 3.357284626  | 4.221439283  |
| ATXN3      | ENSG00000066427.21 | 2.711149752 | 1.584910429  | 0.66589997   |
| PANX2      | ENSG00000073150.13 | 1.308895907 | 3.154417848  | 0.434195261  |
| ZP3        | ENSG00000188372.14 | 2.076675714 | 2.10339849   | 0.007547144  |
| LCA5       | ENSG00000135338.13 | 1.687478525 | 1.01528715   | 1.853998132  |
| CARD8-AS1  | ENSG00000268001.1  | 1.334144369 | 1.222755976  | 2.428294383  |
| ARHGAP29   | ENSG00000137962.12 | 2.419039878 | 2.51198724   | -0.008976707 |
| AC133041.1 | ENSG00000272710.2  | 2.162343227 | 3.102301079  | 1.923448428  |
| TSPAN12    | ENSG00000106025.8  | 4.901640435 | 3.398818693  | 5.354479749  |
| PROCA1     | ENSG00000167525.13 | 1.081883569 | 0.786999997  | -0.060479175 |
| CNIH2      | ENSG00000174871.10 | 4.069877467 | 0.230712958  | 2.167168172  |
| SRGAP2D    | ENSG00000270872.2  | 3.410682781 | 3.05221628   | 0.415304229  |
| C1orf53    | ENSG00000203724.10 | 3.493444283 | 0.778431666  | 0.107624624  |
| RAB11FIP4  | ENSG00000131242.17 | 0.832015539 | 5.989791017  | 5.003485854  |
| SRP54-AS1  | ENSG00000258704.6  | 1.317746193 | 0.61500397   | 0.298843868  |
| FAM185BP   | ENSG00000214439.3  | 0.20871536  | 0.647887212  | 0.663268381  |
| AC011511.1 | ENSG00000167807.15 | 1.272299532 | 0.547657364  | 0.880129497  |
| FAM83G     | ENSG00000188522.14 | 4.311772001 | 3.183511982  | 2.867129953  |

|             |                    |              |             |              |
|-------------|--------------------|--------------|-------------|--------------|
| AL589666.1  | ENSG00000271793.1  | 2.797591371  | 1.631285393 | 0.560431888  |
| AC023043.1  | ENSG00000260552.1  | 4.851767395  | 3.687618107 | 0.752306153  |
| CCDC88B     | ENSG00000168071.21 | 1.779168343  | 2.271269369 | 3.139830628  |
| PLEKHG5     | ENSG00000171680.21 | 4.28312879   | 3.339540608 | 1.981014787  |
| AL513550.1  | ENSG00000228506.1  | 2.503182335  | 1.295983207 | 2.260301584  |
| HSD3B7      | ENSG00000099377.13 | 0.967048183  | 3.035180617 | 0.09649599   |
| CERS1       | ENSG00000223802.7  | 4.187700215  | 4.376998983 | 2.157859556  |
| NP1PB3      | ENSG00000169246.16 | 1.24178611   | 2.354964367 | 1.85924377   |
| PFN4        | ENSG00000176732.6  | 1.866631312  | 0.747314292 | 0.3927435    |
| BOLA2B      | ENSG00000169627.7  | 2.258049414  | 1.706713381 | 1.961649647  |
| AC026271.4  | ENSG00000264885.1  | 2.74286542   | 0.20465227  | 1.633198675  |
| DYSF        | ENSG00000135636.13 | 0.277409964  | 1.864497336 | 0.246587089  |
| ZNF551      | ENSG00000204519.10 | 2.333341607  | 0.706392978 | 1.005646311  |
| C15orf65    | ENSG00000261652.2  | 2.246773882  | 0.834280935 | 3.388592315  |
| BFSP1       | ENSG00000125864.13 | 3.029896984  | 0.312154117 | 1.759914933  |
| EFEMP2      | ENSG00000172638.12 | 2.260455231  | 2.129665487 | 3.044251771  |
| RHPN1-AS1   | ENSG00000254389.3  | 2.184959102  | 0.873453059 | 0.652584842  |
| AC096992.2  | ENSG00000273486.1  | -0.144168545 | 1.135199812 | 1.161405296  |
| ENC1        | ENSG00000171617.13 | 5.149764754  | 2.624955325 | 3.206529644  |
| AL669831.5  | ENSG00000237491.8  | 1.476548925  | 2.732472932 | 0.177257894  |
| KIAA1958    | ENSG00000165185.14 | 2.725661962  | 2.381756658 | 1.34065524   |
| SMAD6       | ENSG00000137834.14 | 3.777343023  | 2.487630964 | -0.012441229 |
| HOXB13      | ENSG00000159184.7  | 3.550253632  | 2.783041271 | 0.039140007  |
| SLC25A5-AS1 | ENSG00000224281.4  | 0.323832141  | 0.340168619 | 1.524136341  |
| AC002310.1  | ENSG00000235560.3  | 1.010580102  | 0.030953229 | 1.17036104   |
| SCARNA15    | ENSG00000252690.3  | 1.31218421   | 0.157939918 | 0.669292264  |
| ZNF554      | ENSG00000172006.11 | 1.49902523   | 0.949524631 | 0.837149862  |
| BBOF1       | ENSG00000119636.15 | 0.97895702   | 1.669012574 | 1.408632723  |
| RAB6B       | ENSG00000154917.10 | 2.423323615  | 4.655198891 | 5.976130875  |
| CCDC149     | ENSG00000181982.18 | 3.825097266  | 0.35936742  | 5.117877419  |
| LIMCH1      | ENSG00000064042.17 | 5.658653673  | 3.38686096  | 0.082994125  |
| FKBP1B      | ENSG00000119782.13 | 2.289419362  | 3.058774372 | 2.683245641  |
| GSTM2       | ENSG00000213366.12 | 2.795656577  | 4.832309818 | 4.271813878  |
| DDX11L2     | ENSG00000236397.3  | 0.190501081  | 1.883457771 | -0.074184449 |
| PABPC5      | ENSG00000174740.7  | 0.079436946  | 1.30607768  | 2.886403276  |
| LRFN1       | ENSG00000128011.4  | 3.670723795  | 4.289444664 | -0.017469169 |
| ZFYVE28     | ENSG00000159733.13 | 2.729471753  | 0.516126451 | 0.142556366  |
| AC009318.2  | ENSG00000273680.1  | 0.73301236   | 1.493737152 | 0.324289301  |
| ASAH2B      | ENSG00000204147.9  | 2.247366955  | 1.596767278 | 1.506973038  |
| ZNF585B     | ENSG00000245680.9  | 2.53911751   | 1.982096144 | 1.994896163  |
| TMCC3       | ENSG00000057704.12 | 2.130732141  | 1.662980122 | 2.772687664  |
| MIR6850     | ENSG00000283764.1  | 2.1843125    | 1.638171025 | 0.113029975  |
| AC026356.1  | ENSG00000274964.1  | 2.036608961  | 1.617359659 | 0.592172348  |
| PRICKLE1    | ENSG00000139174.11 | 1.930599507  | 0.243205939 | 0.029358727  |
| LY96        | ENSG00000154589.6  | 0.762784898  | 1.253223647 | 4.885192051  |
| LINC00476   | ENSG00000175611.11 | 2.763517382  | 2.134098173 | 1.365988342  |

|            |                    |              |              |              |
|------------|--------------------|--------------|--------------|--------------|
| AL139287.1 | ENSG00000240731.1  | 2.500372703  | 2.866339367  | 1.249742706  |
| CTSO       | ENSG00000256043.2  | -0.043746849 | 0.158584023  | 1.816208773  |
| AC026471.1 | ENSG00000260267.1  | 3.430079197  | 3.046609943  | 0.168024254  |
| SNHG10     | ENSG00000247092.6  | 3.776261948  | 2.488668702  | 0.411060113  |
| AC092821.1 | ENSG00000214776.11 | 3.295184503  | 2.897966965  | 3.907917281  |
| AC092295.2 | ENSG00000267309.1  | 1.743131546  | 0.948381512  | 0.784120079  |
| ELMO3      | ENSG00000102890.14 | 1.589465882  | 0.273624762  | 0.607409499  |
| AC093157.1 | ENSG00000233184.6  | 0.021673475  | 1.981790256  | 1.402062843  |
| LINC00342  | ENSG00000232931.5  | 1.659545336  | 2.55200754   | -0.125366941 |
| WASF4P     | ENSG00000188459.4  | 0.97748209   | 0.929032546  | 0.703152966  |
| RNU6-2     | ENSG00000207357.1  | 1.227846162  | 2.724634021  | 0.170874826  |
| AC006001.2 | ENSG00000226824.6  | 1.664357879  | 3.551834371  | 0.599329473  |
| MGMT       | ENSG00000170430.9  | 3.656681342  | 4.416489488  | 4.255489645  |
| STARD5     | ENSG00000172345.13 | -0.227538062 | 1.924491108  | 1.085008242  |
| SNORD19    | ENSG00000212493.1  | 2.632662109  | 2.641911827  | 0.602554442  |
| U91328.2   | ENSG00000272462.2  | -0.212019287 | 1.207790213  | 2.278452458  |
| EDA2R      | ENSG00000131080.14 | 2.211897481  | 4.933320513  | 5.659493     |
| PDGFA      | ENSG00000197461.13 | 1.75380904   | -0.044329725 | 4.535616022  |
| ZNF815P    | ENSG00000235944.8  | 2.31199736   | 2.549371911  | 1.775223461  |
| AP003469.4 | ENSG00000261087.1  | 0.189053532  | 0.149686019  | 0.96036325   |
| AC113398.1 | ENSG00000242814.2  | 0.82363285   | -0.130231106 | 0.810771056  |
| MIR6894    | ENSG00000277474.1  | 1.394554518  | 1.782936896  | 1.827775153  |
| TCTE3      | ENSG00000184786.5  | 0.566526608  | 0.346943224  | 0.682327036  |
| AC112220.4 | ENSG00000271643.1  | 1.048964548  | 1.456178388  | 1.016526122  |
| ZNF880     | ENSG00000221923.8  | 3.238979789  | 4.654537889  | 4.218975729  |
| TMEM255B   | ENSG00000184497.12 | 3.25696115   | 0.347580821  | 3.077976982  |
| AC245060.5 | ENSG00000274422.1  | -0.156915075 | 1.78059508   | 1.424505515  |
| SYCP2      | ENSG00000196074.12 | -0.029011145 | 3.164887216  | 4.162322882  |
| AP001062.1 | ENSG00000184441.4  | 0.735738401  | -0.220299304 | 0.241736498  |
| MIR503HG   | ENSG00000223749.9  | 2.943119442  | 1.3157432    | 2.25481318   |
| AC008741.2 | ENSG00000274925.1  | 0.82258703   | 1.525038667  | 1.262024626  |
| SOCS2-AS1  | ENSG00000246985.7  | 1.870648545  | 2.085384483  | 0.203694596  |
| ENHO       | ENSG00000168913.6  | -0.151236764 | 0.2094107    | 1.406089893  |
| MCIDAS     | ENSG00000234602.7  | 3.063427416  | 2.226984228  | 1.122564239  |
| ANKRD36B   | ENSG00000196912.12 | 1.733924436  | 1.25882559   | -0.242271169 |
| SNORA75    | ENSG00000206885.1  | 0.836517237  | 1.325395578  | 0.908187322  |
| AC034231.1 | ENSG00000249572.1  | 2.384391867  | 2.189255783  | 2.204084796  |
| LTB4R2     | ENSG00000213906.9  | 1.928781073  | 1.658484368  | 1.349106483  |
| HNRNPA1P1C | ENSG00000214223.4  | 2.112245887  | 0.121973375  | 0.761819974  |
| ZNF10      | ENSG00000256223.5  | 2.136498056  | 2.914985062  | 1.223932338  |
| LSMEM1     | ENSG00000181016.9  | -0.199401091 | 2.065366315  | 0.105462741  |
| AC232271.1 | ENSG00000270012.1  | 0.471084637  | 1.378467391  | 0.85999158   |
| AC009113.1 | ENSG00000259877.2  | 2.498932684  | 1.703055609  | 1.212301176  |
| ZNF571     | ENSG00000180479.13 | 0.60709987   | 1.1098593    | 2.258908696  |
| NDUFV2-AS1 | ENSG00000266053.2  | -0.120405912 | 1.198782727  | 0.332505626  |
| FGFBP3     | ENSG00000174721.9  | 1.008278655  | 0.123310031  | 1.03456408   |

|            |                    |              |              |              |
|------------|--------------------|--------------|--------------|--------------|
| TMEM56     | ENSG00000152078.9  | 2.093982753  | 3.969689105  | 2.672849133  |
| AC097534.2 | ENSG00000272870.1  | 1.861889724  | 0.509614326  | 1.702086866  |
| AL606760.1 | ENSG00000226754.1  | 1.250533273  | 0.857704186  | 0.455409076  |
| AC117503.3 | ENSG00000278861.1  | 1.0998217    | 0.282827147  | 0.467852907  |
| AC004771.3 | ENSG00000262227.1  | 1.512247498  | 0.570381595  | 1.404521542  |
| FAM198B    | ENSG00000164125.15 | 2.437115986  | 4.84422288   | 0.046541216  |
| AL021068.1 | ENSG00000213062.4  | 1.579726802  | 2.171911951  | 0.957169027  |
| FAM167B    | ENSG00000183615.5  | 0.370871224  | 5.297445972  | 1.497164596  |
| AC007040.2 | ENSG00000258881.6  | 1.370087608  | 1.0979588    | 0.280632862  |
| TAS2R14    | ENSG00000212127.5  | 1.203147546  | 1.133676958  | 2.265525647  |
| SNORD101   | ENSG00000206754.1  | 3.815727309  | 0.975963982  | 0.557783388  |
| SUPT3H     | ENSG00000196284.15 | 1.901862125  | 2.308141495  | 3.096550871  |
| ZNF546     | ENSG00000187187.13 | 0.476012493  | 1.158934735  | 0.317539703  |
| RPL12P4    | ENSG00000185834.10 | 1.919871267  | 1.298258352  | 0.255144015  |
| KCNIP2     | ENSG00000120049.18 | 0.298828403  | 2.257936367  | 1.316443081  |
| PRKAA2     | ENSG00000162409.10 | 2.09708154   | 2.319490218  | 0.878616017  |
| PBLD       | ENSG00000108187.15 | 0.955865572  | -0.071416312 | 1.669834953  |
| AL139035.1 | ENSG00000280710.2  | 1.675384731  | 1.153795923  | 1.561333574  |
| SCOC-AS1   | ENSG00000196951.10 | 0.51105327   | -0.051975273 | 2.699602139  |
| LETM2      | ENSG00000165046.12 | 2.45150696   | 0.147951404  | 1.353543074  |
| AC112220.2 | ENSG00000271020.1  | 2.024710143  | 1.914782485  | 1.820429337  |
| P2RX6      | ENSG00000099957.16 | 1.378292956  | 2.531034331  | 0.206466551  |
| FAM151B    | ENSG00000152380.9  | 0.958298148  | -1.4055E-05  | 2.116252427  |
| INO80B     | ENSG00000115274.14 | 4.746863595  | 5.099288507  | 3.359859505  |
| PKIA       | ENSG00000171033.12 | 1.694920962  | 0.301810188  | 3.476122941  |
| SLC9A3-AS1 | ENSG00000225138.7  | -0.166097956 | 6.546896457  | 3.562048754  |
| CDKN1C     | ENSG00000129757.12 | 3.367409927  | 3.01340216   | 2.52137979   |
| ARMC2      | ENSG00000118690.12 | 1.636917401  | 0.598295544  | 1.888901091  |
| AP001893.1 | ENSG00000254694.1  | 0.619113552  | 0.505223646  | 1.030121876  |
| NPPA-AS1   | ENSG00000242349.5  | 0.973555676  | 1.803556296  | 2.393488678  |
| SLC2A10    | ENSG00000197496.5  | 0.084825273  | 5.704785131  | 4.963554855  |
| PLEKHA8P1  | ENSG00000134297.6  | 3.621627326  | 2.813598153  | 0.17986559   |
| AL136295.4 | ENSG00000259522.3  | 4.732299694  | 3.635029817  | 4.322196574  |
| KALRN      | ENSG00000160145.15 | 3.726112734  | 0.53263325   | 3.355133216  |
| C4orf36    | ENSG00000163633.10 | 0.224212488  | 1.973125674  | 4.520858433  |
| MAGI2      | ENSG00000187391.19 | 1.274757284  | 3.050512624  | 3.483024375  |
| AL049840.5 | ENSG00000270108.1  | 0.977643262  | 0.445820741  | 0.761130895  |
| RHBDL1     | ENSG00000103269.13 | 1.891102804  | 1.941934905  | 1.608110528  |
| ZFP69B     | ENSG00000187801.14 | 3.837471958  | 0.268335167  | 1.062234701  |
| AC011815.1 | ENSG00000268573.1  | 1.119517071  | 2.709980515  | 0.374977711  |
| AC096919.1 | ENSG00000226360.5  | 1.755319917  | 1.142310966  | 0.92074434   |
| SAMD5      | ENSG00000203727.3  | 1.626974197  | 2.843861179  | -0.232485013 |
| AC012313.4 | ENSG00000268543.1  | 2.592785046  | 1.381836366  | 0.864827799  |
| AL360181.2 | ENSG00000235245.1  | 1.823475026  | 1.05525064   | 0.641267643  |
| MRPL45P2   | ENSG00000228782.7  | 3.404415877  | 3.324716036  | 3.680074708  |
| PCDHGB2    | ENSG00000253910.2  | 1.689191173  | 1.353934718  | 0.546843312  |

|            |                    |              |              |              |
|------------|--------------------|--------------|--------------|--------------|
| AC078846.1 | ENSG00000273329.1  | 1.260623184  | 1.291893102  | 0.016485929  |
| SSBP2      | ENSG00000145687.16 | 2.749754121  | 0.118655421  | 1.410311419  |
| WWC1       | ENSG00000113645.14 | 1.682618212  | 2.907685352  | 2.281323382  |
| GPR37      | ENSG00000170775.2  | 2.995244784  | 3.79221717   | 2.882895011  |
| GUSBP11    | ENSG00000228315.11 | 0.704589201  | 2.569702264  | 1.693049519  |
| AC090181.3 | ENSG00000278991.1  | 0.224409348  | 0.2751929    | 1.009232735  |
| MMP1       | ENSG00000196611.4  | -0.094273178 | 0.801289509  | 2.974974014  |
| AC093525.8 | ENSG00000279520.1  | 0.187360428  | 1.313462499  | 1.584153601  |
| FNDC10     | ENSG00000228594.3  | 3.488640114  | 4.80319117   | -0.181336493 |
| SRGAP3     | ENSG00000196220.15 | 1.674449181  | 1.813981841  | 0.839181797  |
| SLC43A2    | ENSG00000167703.14 | 1.944899893  | 0.099714455  | -0.127011725 |
| PMEL       | ENSG00000185664.14 | 0.631144185  | 12.92081373  | 10.03109443  |
| SLC26A10   | ENSG00000135502.17 | 1.099590772  | 2.048709552  | 3.327259558  |
| AC004706.4 | ENSG00000282936.1  | 0.949071177  | 0.037120037  | -0.33313895  |
| FAM86JP    | ENSG00000171084.15 | 2.695478424  | 3.012797716  | -0.102034964 |
| SOX6       | ENSG00000110693.17 | 0.041581568  | 4.12092896   | 2.781778589  |
| AC073896.1 | ENSG00000144785.8  | 1.579951482  | -0.154351654 | 2.061720904  |
| FOLH1      | ENSG00000086205.16 | 1.487831142  | 3.071150848  | 2.516265513  |
| Z95115.1   | ENSG00000261188.1  | 3.328249974  | 2.170946442  | 2.46352588   |
| LOH12CR2   | ENSG00000205791.3  | 0.082272169  | 0.183159383  | 2.540549916  |
| AC011503.2 | ENSG00000269397.1  | 1.031701557  | 0.297493942  | -0.255770012 |
| DLX6       | ENSG00000006377.10 | 0.808677833  | 2.049740007  | 1.554400553  |
| SP2-AS1    | ENSG00000234494.7  | 1.220093963  | 1.24645064   | 1.496431012  |
| ERO1B      | ENSG00000086619.13 | 4.885046186  | 2.256013598  | 3.323089256  |
| MIR4690    | ENSG00000266041.1  | 2.22762632   | 1.734333526  | 0.782134251  |
| AC244669.1 | ENSG00000223804.5  | 3.146940834  | 2.845958206  | 1.648651103  |
| AC025449.1 | ENSG00000270558.1  | 2.081224521  | 0.462993159  | 0.196212436  |
| AC008870.2 | ENSG00000260751.2  | 0.677870013  | 1.074571412  | 1.417477386  |
| MIR616     | ENSG00000208028.1  | 1.264930492  | 2.237477921  | 5.000176212  |
| AL137782.1 | ENSG00000261553.5  | 1.350793149  | 0.467025862  | 1.221242083  |
| HCG4       | ENSG00000176998.4  | 0.097594261  | 0.851733341  | -0.343982251 |
| LSAMP      | ENSG00000185565.11 | 2.316278682  | 3.266651398  | 2.207651923  |
| HIST4H4    | ENSG00000197837.3  | 0.99097394   | 2.30531032   | 1.363638908  |
| SCML2      | ENSG00000102098.17 | 3.243033645  | 1.194033629  | 0.067287182  |
| AC012181.2 | ENSG00000261114.1  | 1.769092592  | 2.791171004  | 1.440490179  |
| PMEP1      | ENSG00000124225.15 | 6.74127394   | 5.227181369  | -0.149807241 |
| AC008736.1 | ENSG00000267475.1  | 2.031966807  | 1.497444457  | 1.732995511  |
| AC018690.1 | ENSG00000273306.1  | 1.353670725  | 0.368917663  | 0.881604856  |
| AC022400.5 | ENSG00000272140.2  | 1.179948169  | 0.358985488  | 1.072095321  |
| IFITM3     | ENSG00000142089.15 | 8.780543928  | 3.887261302  | 6.488951113  |
| AP000347.1 | ENSG00000272578.5  | 0.33210591   | 1.15936182   | 2.390388456  |
| H3F3AP6    | ENSG00000178458.5  | 2.449682485  | 0.230388397  | 0.090145894  |
| AP001453.1 | ENSG00000256116.1  | 0.298546419  | -0.018005508 | 1.2907174    |
| CU633906.2 | ENSG00000278903.3  | 1.049951673  | -0.147676707 | 0.509342889  |
| ARIH2OS    | ENSG00000221883.2  | 0.966392975  | 0.336207143  | 0.032238961  |
| AL137002.2 | ENSG00000283828.1  | -0.220039514 | 0.996199448  | 2.046105467  |

|             |                    |              |              |              |
|-------------|--------------------|--------------|--------------|--------------|
| MIR210HG    | ENSG00000247095.2  | 0.249581903  | 0.613698946  | 0.144552601  |
| H1FX-AS1    | ENSG00000206417.8  | 3.367547277  | 0.175981426  | 1.696745767  |
| ARMCX4      | ENSG00000196440.11 | 1.041781282  | 3.462211825  | 2.778418764  |
| FAM86HP     | ENSG00000253540.5  | 2.223910068  | 2.236621402  | -0.098172369 |
| AC145423.2  | ENSG00000274427.1  | 0.597347573  | 1.039609405  | 3.568880444  |
| CLEC2D      | ENSG00000069493.14 | -0.267296505 | 2.736653094  | 2.717686735  |
| SPTY2D1-AS1 | ENSG00000247595.4  | 1.48829807   | 1.895822659  | 1.213071807  |
| LRRC37A3    | ENSG00000176809.10 | -0.364487377 | 1.717345757  | 1.220506122  |
| RFX3        | ENSG00000080298.15 | 2.666406148  | 2.048915962  | 2.452561518  |
| MACROD2     | ENSG00000172264.16 | 0.696284559  | 0.737245209  | 0.392994076  |
| TYW1B       | ENSG00000277149.4  | 2.35486116   | 3.380217901  | 0.707436286  |
| THAP7-AS1   | ENSG00000230513.1  | 2.610269517  | 2.979996404  | 0.224898834  |
| SNORA14B    | ENSG00000207181.1  | 2.765740542  | 0.7551516    | 0.90056584   |
| JMJD7-PLA2G | ENSG00000168970.22 | 1.377469624  | 1.976246011  | 2.132182327  |
| TFEB        | ENSG00000112561.17 | 1.032100104  | 1.893140022  | 2.146664608  |
| FCGR2A      | ENSG00000143226.13 | 5.498133213  | 4.483740408  | 4.220538573  |
| MDH1B       | ENSG00000138400.12 | 0.783014271  | 1.815646656  | -0.040000542 |
| ZNF396      | ENSG00000186496.10 | 0.344914754  | 2.116951973  | 1.460533646  |
| CNKS3       | ENSG00000153721.18 | 2.555391363  | 1.002243504  | 2.625936768  |
| EEF1A1P13   | ENSG00000250182.3  | 1.285072288  | 0.262206591  | 0.450884213  |
| WWTR1-AS1   | ENSG00000241313.2  | 0.571665162  | 1.327065239  | 0.535624807  |
| AL596202.1  | ENSG00000235381.1  | 3.188078493  | -0.142873202 | -0.180013737 |
| CATSPER2    | ENSG00000166762.16 | 0.22332002   | 1.989551664  | 2.03224877   |
| ULK2        | ENSG00000083290.19 | 0.925350236  | 1.238032243  | 4.312049462  |
| P2RX4       | ENSG00000135124.14 | 0.383046514  | 4.957452771  | 4.294031021  |
| LINC01311   | ENSG00000260924.2  | 0.662452173  | 0.866334129  | 0.331325176  |
| HIST1H4H    | ENSG00000158406.4  | 1.029084615  | 3.451202178  | 0.140040351  |
| AC115618.1  | ENSG00000204620.3  | 1.427104564  | 0.193363816  | 0.411270165  |
| NOTCH1      | ENSG00000148400.9  | 3.776146057  | 3.740986446  | 2.849018612  |
| ZNF137P     | ENSG00000123870.10 | 0.569361045  | 1.452519089  | 1.816277719  |
| GREB1       | ENSG00000196208.13 | 0.148888656  | 6.547414638  | 6.366254946  |
| BHLHB9      | ENSG00000198908.11 | 0.365511767  | 0.391246171  | 0.030877798  |
| AC139795.2  | ENSG00000247679.2  | 0.566341069  | 0.875571966  | -0.138143179 |
| LMNTD2      | ENSG00000185522.8  | 0.167464422  | 2.364765414  | 3.064424288  |
| AC120114.1  | ENSG00000247735.2  | 1.788529167  | 0.637550424  | -0.177834122 |
| CCDC7       | ENSG00000216937.13 | 0.743353015  | 0.281429797  | 2.044538111  |
| TTPA        | ENSG00000137561.4  | 1.374112043  | 1.349984857  | -0.344916629 |
| GAPDHP1     | ENSG00000228232.1  | 1.339025111  | 0.430456162  | 0.455226513  |
| GJB1        | ENSG00000169562.9  | 4.844220006  | 6.172854491  | 8.613329418  |
| RASEF       | ENSG00000165105.9  | -0.328014692 | 5.10495135   | 5.603206746  |
| NPIP14P     | ENSG00000226232.8  | 2.055105874  | 1.610562448  | 3.548606817  |
| AC139795.1  | ENSG00000246596.6  | 2.353259384  | 1.745815211  | 2.470235564  |
| SYN3        | ENSG00000185666.14 | 0.793892286  | 2.209045614  | -0.056667275 |
| ZSCAN12     | ENSG00000158691.14 | 1.469812524  | 2.399420416  | 2.777049803  |
| AC138409.2  | ENSG00000215158.9  | 1.302083712  | 1.251181232  | 1.630425933  |
| YJEFN3      | ENSG00000250067.11 | 4.295869257  | 2.754331198  | 1.454682727  |

|            |                    |              |              |              |
|------------|--------------------|--------------|--------------|--------------|
| RCN3       | ENSG00000142552.7  | 2.988973599  | 6.828297332  | 0.01570964   |
| PRSS53     | ENSG00000151006.7  | 2.293689276  | 1.70047846   | 0.92586264   |
| SNORD30    | ENSG00000277846.1  | 3.504796889  | 2.254342296  | 1.040868906  |
| VDAC1P1    | ENSG00000073905.8  | 0.142249232  | -0.146436703 | 0.009176874  |
| MESP1      | ENSG00000166823.5  | 2.067666543  | -0.013123228 | 2.05511706   |
| AC034236.2 | ENSG00000271918.1  | 0.907487774  | -0.224671607 | 1.099531789  |
| PCSK6      | ENSG00000140479.16 | 1.537637386  | 5.197740085  | 8.501027744  |
| RPS7P11    | ENSG00000213326.4  | 1.277871836  | 0.894527293  | -0.106669427 |
| ADAM22     | ENSG00000008277.14 | 3.022349589  | 0.085373206  | 2.106838741  |
| SNORD38A   | ENSG00000202031.1  | 3.157740496  | 2.887343339  | 0.853729439  |
| UBBP4      | ENSG00000263563.5  | 2.991492743  | 0.874392845  | 2.401628672  |
| PRR13P5    | ENSG00000187534.6  | 1.037621615  | 1.084781064  | 0.63719944   |
| AC007405.3 | ENSG00000239467.5  | 0.03909436   | 2.764895528  | 4.76037756   |
| LIFR       | ENSG00000113594.9  | 4.215543821  | 2.072621328  | -0.263858411 |
| MAP3K5     | ENSG00000197442.9  | 1.741304536  | 2.764682543  | 3.66131969   |
| SPEG       | ENSG00000072195.14 | 2.58719357   | 3.307032296  | -0.245260779 |
| ZNF737     | ENSG00000237440.8  | 3.072284013  | 2.907241904  | 1.420335699  |
| DNAJB5     | ENSG00000137094.14 | 1.909728217  | 1.835686425  | 0.116324686  |
| FAM218A    | ENSG00000250486.3  | 0.669337202  | -0.401951455 | 0.117660767  |
| AC018755.3 | ENSG00000269388.1  | -0.081878309 | 1.391058522  | 1.466332194  |
| CCDC157    | ENSG00000187860.10 | 1.481549841  | 0.22641936   | 1.64310037   |
| AP003119.3 | ENSG00000261578.1  | -0.149226484 | -0.076919973 | 3.135456388  |
| AF274858.3 | ENSG00000260081.1  | 0.433766228  | 1.628138194  | 0.614340484  |
| FRAT1      | ENSG00000165879.8  | 3.21454079   | 0.766989616  | 1.345987769  |
| SNORA26    | ENSG00000212588.1  | 3.543140054  | 0.426567054  | 2.393299158  |
| TMC7       | ENSG00000170537.12 | 2.279854064  | 0.958016115  | 0.014022248  |
| ICA1       | ENSG00000003147.17 | 3.419028695  | 2.901523927  | 5.057292807  |
| HMG2N2P5   | ENSG00000234664.1  | 3.32208252   | 1.622482457  | -0.103987195 |
| RAC1P2     | ENSG00000249936.3  | 0.854624756  | 0.520324071  | 0.142083206  |
| LINC00702  | ENSG00000233117.2  | -0.011265743 | 1.953588965  | 0.51109824   |
| AC012640.2 | ENSG00000259802.1  | 1.971923471  | 1.3948273    | 0.014975227  |
| MSANTD3-TM | ENSG00000251349.3  | 1.79235648   | 1.681239098  | 0.323766665  |
| AK3P3      | ENSG00000230042.1  | 0.113312854  | 1.710620214  | 1.652189033  |
| KCTD21-AS1 | ENSG00000246174.7  | 2.907106138  | 0.648647596  | 2.546033973  |
| AC138866.1 | ENSG00000253816.3  | 1.965525861  | 1.041029757  | 1.666586575  |
| AC090739.1 | ENSG00000254165.1  | 0.018622407  | 0.679889052  | 1.355457724  |
| RTN4R      | ENSG00000040608.13 | 1.2135887    | 4.256141789  | 3.567116156  |
| AC090825.1 | ENSG00000259363.5  | 1.594708588  | 1.579195479  | 2.951106533  |
| ERMAP      | ENSG00000164010.13 | 1.41876581   | 1.211688561  | -0.069110989 |
| PCDHGA4    | ENSG00000262576.2  | 2.208628029  | 1.140142496  | -0.212326228 |
| U2AF1      | ENSG00000160201.11 | 0.68475582   | 1.670822607  | 0.806297495  |
| CCT6P3     | ENSG00000234585.6  | 0.553425863  | 1.780761479  | 0.04613004   |
| AFF3       | ENSG00000144218.18 | 0.188548384  | 3.630446993  | 4.477311348  |
| AL121658.1 | ENSG00000272716.1  | 1.919207619  | 0.699073238  | -0.323717219 |
| KIAA1217   | ENSG00000120549.17 | 5.23086038   | -0.279645335 | 3.540110643  |
| C5orf56    | ENSG00000197536.11 | 0.447227595  | 1.007494454  | 2.188574145  |



|            |                    |              |              |              |
|------------|--------------------|--------------|--------------|--------------|
| FRMD6-AS1  | ENSG00000273888.1  | 1.551251883  | 1.07095481   | 0.012647408  |
| AL136295.7 | ENSG00000278784.1  | 1.18423501   | 0.395928776  | 0.335093015  |
| SAMD15     | ENSG00000100583.4  | 2.414105098  | 0.232205042  | 0.237742581  |
| ZNF44      | ENSG00000197857.13 | 3.750739821  | 1.3569625    | 3.127491093  |
| FZD2       | ENSG00000180340.6  | 3.967964067  | 3.102672605  | -0.034342275 |
| AL034549.1 | ENSG00000275784.1  | 0.378232615  | 0.60538648   | -0.108105871 |
| ANG        | ENSG00000214274.9  | -0.230382309 | 1.557048708  | 1.749385726  |
| KLF4       | ENSG00000136826.14 | 5.12782294   | 1.439984144  | 0.915748323  |
| ID4        | ENSG00000172201.11 | 3.196299575  | 2.285785242  | 6.287604735  |
| USP27X-AS1 | ENSG00000234390.4  | -0.288685625 | 0.283609214  | 0.888801659  |
| MIR762HG   | ENSG00000260083.1  | 1.481155633  | 0.109742492  | 0.052962086  |
| REC8       | ENSG00000100918.12 | 0.193127772  | 0.0228018    | 1.8515684    |
| KDM4A-AS1  | ENSG00000236200.5  | 1.971140507  | 1.14092588   | 0.052516275  |
| C5         | ENSG00000106804.7  | -0.144506966 | -0.13154895  | 0.091764276  |
| RUNX2      | ENSG00000124813.20 | 1.944201846  | 1.26385189   | 3.483531932  |
| MIR17HG    | ENSG00000215417.12 | 2.43108605   | 1.694324743  | 0.484764147  |
| FGFBP2     | ENSG00000137441.7  | 2.746633055  | 2.224495611  | 8.438837861  |
| AC107027.3 | ENSG00000261167.1  | 0.197380203  | 0.532845799  | 1.053057776  |
| EIF2S2P4   | ENSG00000128692.8  | -0.027170492 | 0.123749615  | 1.015577561  |
| AC133065.5 | ENSG00000275673.1  | 0.321021991  | 0.598106679  | 2.315851474  |
| AC026250.1 | ENSG00000245522.2  | 1.430724084  | 0.865910011  | 0.748642219  |
| AC003102.1 | ENSG00000260793.2  | 1.384673379  | 1.271425455  | 0.612401194  |
| CD274      | ENSG00000120217.13 | 1.871946535  | 1.020137359  | 4.166072764  |
| AC004908.2 | ENSG00000272812.1  | 0.676541974  | -0.090879661 | 1.012516898  |
| AC004477.1 | ENSG00000263412.1  | 0.513238407  | 0.598283209  | 1.087442757  |
| CASTOR1    | ENSG00000239282.7  | 1.011388539  | 2.34994531   | 2.193605671  |
| MIR1254-1  | ENSG00000221184.1  | 1.301833422  | 0.894552417  | 1.084275585  |
| NBPF10     | ENSG00000271425.7  | 0.83140126   | 0.824521643  | -0.451794297 |
| HOXD1      | ENSG00000128645.14 | -0.194507326 | 2.134415279  | 1.468465414  |
| C15orf52   | ENSG00000188549.12 | 4.647405904  | 4.814307783  | 0.113465658  |
| ZC3H6      | ENSG00000188177.13 | 0.169183138  | 2.312824402  | 3.095540178  |
| TSSK3      | ENSG00000162526.6  | 1.126983388  | 0.397072602  | 0.162071137  |
| C10orf35   | ENSG00000171224.8  | 1.68359148   | 3.430213703  | -0.353131998 |
| LHPP       | ENSG00000107902.13 | 2.306491908  | 2.315606294  | 2.409553902  |
| SYNC       | ENSG00000162520.14 | 1.365888963  | 3.919474035  | 1.658245356  |
| AC004816.1 | ENSG00000259153.1  | 2.355318507  | 1.154056044  | 0.345461597  |
| CLDN1      | ENSG00000163347.5  | 0.174361826  | 0.48937745   | -0.548955762 |
| S100A1     | ENSG00000160678.11 | 8.486485392  | 7.184752905  | 5.590743525  |
| EML2-AS1   | ENSG00000267757.4  | 3.762975696  | 1.528141141  | -0.069558217 |
| AC097468.3 | ENSG00000272644.1  | 1.745104719  | 1.424024476  | 0.115070477  |
| FRMD3      | ENSG00000172159.15 | 4.833544019  | 4.264956546  | 3.081183172  |
| PVRIG2P    | ENSG00000235333.3  | 2.365142495  | 3.519380234  | 3.542521466  |
| Z82243.1   | ENSG00000273243.1  | 1.295266442  | 1.894769896  | 1.635299558  |
| FTH1P23    | ENSG00000242960.1  | 1.348422558  | 1.03045639   | 0.077323895  |
| PCOTH      | ENSG00000205861.11 | 1.007523902  | 2.259485371  | -0.12750655  |
| CCDC191    | ENSG00000163617.10 | -0.157538136 | 0.04830854   | 2.18484464   |

|            |                    |              |              |              |
|------------|--------------------|--------------|--------------|--------------|
| FLRT3      | ENSG00000125848.9  | 5.20731382   | 1.264635776  | -0.162596153 |
| AL031727.1 | ENSG00000226396.1  | 0.274811148  | 1.764956257  | 2.440094983  |
| LINC01355  | ENSG00000261326.2  | 0.317101887  | 0.956148277  | -0.559706433 |
| RPL7AP6    | ENSG00000242071.3  | 1.908062304  | 1.884825613  | -0.31269517  |
| MAN1B1-AS1 | ENSG00000268996.3  | 1.101138659  | 1.368295613  | -0.449552857 |
| AL162595.1 | ENSG00000177788.5  | 2.313813891  | 0.623786637  | 1.282321083  |
| YTHDF3-AS1 | ENSG00000270673.1  | 0.362212496  | 0.26723995   | -0.000629012 |
| CPN1       | ENSG00000120054.11 | 4.319893789  | 4.229305988  | 4.812678256  |
| PPM1N      | ENSG00000213889.10 | 1.555073824  | 2.074766362  | 1.248524506  |
| IFITM2     | ENSG00000185201.16 | 5.002955025  | 2.437232211  | -0.306387637 |
| ZSCAN31    | ENSG00000235109.7  | -0.097336615 | 0.136713113  | 0.635010453  |
| AC022007.1 | ENSG00000206567.9  | 0.653897471  | 1.873577626  | 1.910304961  |
| ZNF320     | ENSG00000182986.12 | 4.692219978  | 4.00485474   | 4.870757687  |
| AC060780.3 | ENSG00000267595.1  | 1.851040738  | 1.927002535  | 2.57689295   |
| FCER1G     | ENSG00000158869.10 | 1.046594923  | 3.606972497  | 5.06051557   |
| AL928654.5 | ENSG00000279495.1  | -0.379658691 | 1.265639679  | 1.397296218  |
| AC010186.3 | ENSG00000257027.1  | -0.317197205 | 2.306955322  | 2.547720867  |
| AC098820.1 | ENSG00000232485.2  | -0.314598704 | 0.94177796   | -0.160982236 |
| RDM1       | ENSG00000278023.5  | 1.884801207  | 1.817057519  | 2.124121868  |
| Y_RNA      | ENSG00000222881.1  | 1.238519816  | 0.78717112   | -0.208748975 |
| AC087499.1 | ENSG00000188013.6  | 1.435264989  | 1.769466542  | 3.028813679  |
| LINC01547  | ENSG00000183250.11 | 2.308991729  | 0.482587298  | 0.016713753  |
| CD302      | ENSG00000241399.6  | 3.543868274  | 3.628655216  | 4.867385108  |
| AC084125.2 | ENSG00000255182.2  | 1.576000937  | 2.10218503   | 0.147214922  |
| MT-TL2     | ENSG00000210191.1  | 1.587827843  | 2.449860056  | 0.445951231  |
| PCDH1      | ENSG00000156453.13 | 4.670325649  | 1.640312659  | -0.576836332 |
| SCNN1D     | ENSG00000162572.20 | 0.074158486  | 1.715828733  | -0.151728695 |
| GBP2       | ENSG00000162645.12 | 5.885151846  | 0.379591929  | 5.395718687  |
| GRAMD1C    | ENSG00000178075.19 | 1.906307709  | 2.247968864  | 2.035894054  |
| GHET1      | ENSG00000281189.1  | 0.536722865  | 0.685992329  | 0.527116889  |
| RHPN1      | ENSG00000158106.13 | 4.044505769  | 2.985545499  | 2.404489168  |
| AC124242.1 | ENSG00000245281.6  | 1.156592544  | 0.002961629  | 2.188442022  |
| LRRK2      | ENSG00000188906.14 | 4.181029252  | 3.096719302  | -0.564987342 |
| MTND4LP30  | ENSG00000198868.3  | 0.533584891  | 1.202201432  | 1.466351805  |
| CASC10     | ENSG00000204682.5  | 2.250900573  | 1.651394028  | 0.89346407   |
| AC079250.1 | ENSG00000230979.3  | 1.765120482  | 1.424122486  | 0.313644099  |
| STON2      | ENSG00000140022.9  | 1.193843215  | 2.408021468  | 1.770203859  |
| EVI2A      | ENSG00000126860.11 | 1.745788052  | -0.191791194 | 3.964370848  |
| AP002748.3 | ENSG00000255517.6  | 2.485920393  | 2.19196121   | 2.21546247   |
| AC004241.3 | ENSG00000276390.1  | 2.278486119  | 0.718934934  | 0.022886753  |
| AL133215.2 | ENSG00000273162.1  | 1.879318737  | -0.162555439 | 0.18054707   |
| AC006058.3 | ENSG00000272121.1  | 0.832429111  | 0.693913698  | 1.038176753  |
| KLHL29     | ENSG00000119771.14 | 2.77994416   | 3.876938136  | -0.498550852 |
| ARF4-AS1   | ENSG00000272146.5  | 2.143377311  | 1.301462713  | 0.499529747  |
| NAGS       | ENSG00000161653.10 | -0.375943321 | 1.140121633  | 2.195491414  |
| MPZ        | ENSG00000158887.15 | 4.140380478  | 1.640206399  | -0.077570577 |

|            |                    |              |              |              |
|------------|--------------------|--------------|--------------|--------------|
| AC023043.4 | ENSG00000274849.1  | 4.404932421  | 3.774735291  | 2.677249994  |
| AC087500.1 | ENSG00000261879.5  | 0.821771609  | -0.09881933  | 0.033866105  |
| SLC29A3    | ENSG00000198246.7  | 2.371475023  | 2.46026383   | -0.20268624  |
| SNORD6     | ENSG00000202314.1  | 2.334971265  | 0.491077389  | 2.547735006  |
| DGCR11     | ENSG00000273311.1  | -0.655534519 | 1.822656648  | 0.687166835  |
| AC005546.1 | ENSG00000266897.1  | 0.581172079  | -0.10830161  | -0.059865102 |
| AP001330.5 | ENSG00000271882.1  | -0.113045387 | 1.534846503  | 0.835294795  |
| HEY2       | ENSG00000135547.8  | 2.077448108  | 2.353464022  | 3.090640257  |
| C9orf116   | ENSG00000160345.12 | 3.10804112   | 3.126941977  | 0.965644774  |
| AL158206.1 | ENSG00000260912.1  | 1.387213432  | 0.801757735  | 1.176068406  |
| MDK        | ENSG00000110492.15 | 5.644512692  | 5.950362063  | 8.020566009  |
| NPPC       | ENSG00000163273.3  | 1.635509205  | 1.963446518  | 3.632773642  |
| PCDHB14    | ENSG00000120327.6  | 0.942504935  | -0.478421169 | 1.28036533   |
| LINC00115  | ENSG00000225880.5  | 1.236799698  | 1.464353261  | 1.194278035  |
| AL161891.1 | ENSG00000276672.1  | 2.882735201  | 0.902188398  | -0.429829314 |
| RPS7P3     | ENSG00000231940.1  | 1.286536285  | 0.385669994  | -0.404076747 |
| AL512353.1 | ENSG00000228192.7  | 3.262128065  | 2.31551971   | -0.165112854 |
| ZNF321P    | ENSG00000213801.4  | 0.721860417  | 0.816089473  | 1.001505822  |
| PKDCC      | ENSG00000162878.12 | 2.871753573  | 1.999340638  | 0.950925552  |
| PPM1H      | ENSG00000111110.11 | 2.15371936   | 4.840313783  | 5.201505125  |
| SLC1A1     | ENSG00000106688.11 | 5.1454223    | 2.572643908  | 2.22347566   |
| KPNA5      | ENSG00000196911.10 | 1.076800895  | 0.762482401  | 1.339971852  |
| snoR1      | ENSG00000281010.1  | 4.564421257  | 3.103853448  | 1.858661692  |
| RANP1      | ENSG00000236603.2  | 1.123305089  | 0.302005217  | 2.043016883  |
| PDE4A      | ENSG00000065989.15 | 4.569668003  | 3.189748837  | 3.656804258  |
| IL17RD     | ENSG00000144730.17 | 0.367503644  | 1.622809946  | 5.872060277  |
| FAM78A     | ENSG00000126882.12 | 4.489946667  | 1.454550627  | -0.648856736 |
| AL133517.1 | ENSG00000232450.1  | 0.364848107  | 0.739967361  | -0.445354955 |
| LYPD1      | ENSG00000150551.10 | 5.59880969   | 5.040599927  | -0.26527045  |
| SNORD20    | ENSG00000207280.1  | 1.169965749  | 1.794939045  | -0.391675342 |
| GDPD3      | ENSG00000102886.14 | -0.116552823 | -0.53195466  | 1.817096419  |
| TSTD3      | ENSG00000228439.5  | 1.617895603  | 1.15994101   | 0.307334468  |
| DLL3       | ENSG00000090932.10 | 2.039466559  | 7.063263555  | 3.114310458  |
| AL359504.2 | ENSG00000271576.1  | 0.002022606  | 0.562707201  | 0.180341639  |
| SHROOM1    | ENSG00000164403.14 | 3.360392229  | 2.649622532  | 3.658604113  |
| GKAP1      | ENSG00000165113.12 | 1.85565486   | 1.979942617  | 2.010274354  |
| AC090198.1 | ENSG00000253106.1  | 0.683728719  | -0.406857569 | 1.197586835  |
| AL357079.1 | ENSG00000237950.1  | 0.166528914  | -0.066866378 | 1.669704506  |
| AC008038.1 | ENSG00000283041.1  | 1.31214503   | 0.939350652  | 1.318314734  |
| AC006504.1 | ENSG00000261770.1  | 0.112314801  | 0.53571889   | 1.528156837  |
| DUSP8P5    | ENSG00000235316.1  | 0.776933063  | -0.146718638 | 0.602829959  |
| LYPD6      | ENSG00000187123.14 | -0.454950248 | 2.956539233  | 2.508340282  |
| LINC01024  | ENSG00000245146.6  | 0.930269725  | -0.229789846 | 1.325570774  |
| AC022098.1 | ENSG00000267169.1  | 1.618931728  | 1.556072439  | 1.461524744  |
| TUBB4A     | ENSG00000104833.11 | 2.99509022   | 6.465717399  | 5.717593095  |
| AL136981.2 | ENSG00000275318.1  | 1.879878178  | 2.245473587  | 0.081603164  |

|             |                    |              |              |              |
|-------------|--------------------|--------------|--------------|--------------|
| RBKS        | ENSG00000171174.13 | -0.188744266 | 2.580928508  | 0.204522348  |
| MMAA        | ENSG00000151611.13 | 0.90899318   | 1.385367208  | 0.7364034    |
| BATF3       | ENSG00000123685.8  | 2.131171517  | 2.303170809  | 1.480214408  |
| AC008555.8  | ENSG00000280106.1  | -0.101029622 | 0.345500428  | 0.292247774  |
| ZNF22       | ENSG00000165512.4  | 4.727671778  | 1.165991092  | 4.46767216   |
| SMIM25      | ENSG00000224397.5  | -0.043288973 | 4.636781785  | 4.525047646  |
| SEMA4G      | ENSG00000095539.15 | 2.083474617  | 3.172654838  | 2.99281155   |
| TBX6        | ENSG00000149922.10 | 1.452261056  | 1.148338144  | 0.78040898   |
| ZNF470      | ENSG00000197016.11 | 1.605886406  | 1.380159535  | 0.450134206  |
| NRROS       | ENSG00000174004.5  | 2.213837402  | 2.728010003  | 6.072198589  |
| HMG2N2P6    | ENSG00000257179.1  | 2.021475889  | -0.191759143 | 1.190862655  |
| AC073548.1  | ENSG00000279861.1  | -0.225511998 | -0.074730516 | 0.561467683  |
| SEMA6C      | ENSG00000143434.15 | 1.567787476  | 2.775595101  | 1.480617339  |
| AC002116.2  | ENSG00000267698.1  | 1.45696773   | 0.491623487  | -0.25028256  |
| SLC7A5P2    | ENSG00000258186.2  | 0.443351191  | 1.970977566  | 2.190556605  |
| SLC9A5      | ENSG00000135740.16 | 2.892953769  | 1.372479336  | 1.888330558  |
| GOLGA6L5P   | ENSG00000230373.8  | -0.125324387 | 0.706666512  | 0.452897857  |
| YBX1P2      | ENSG00000231167.3  | 0.965226333  | -0.193180824 | 0.086070058  |
| TCEANC      | ENSG00000176896.8  | 0.62011341   | -0.167719054 | 1.703888304  |
| AC005840.3  | ENSG00000256433.2  | 2.557000586  | 1.177542796  | 1.48685342   |
| AC010327.5  | ENSG00000276570.1  | -0.436678749 | 0.071486739  | 0.590416168  |
| AC093297.2  | ENSG00000251141.5  | 4.280106437  | 3.272536909  | 3.557198152  |
| TTC3P1      | ENSG00000215105.4  | 0.21681268   | 0.890107958  | -0.50196915  |
| AF001548.2  | ENSG00000263335.1  | 2.073586432  | -0.515534256 | 2.30328965   |
| CBX3P2      | ENSG00000266405.3  | 1.605904007  | -0.122817216 | 0.065953949  |
| HES4        | ENSG00000188290.10 | 0.249875855  | 4.192872401  | 2.544360983  |
| LINC00894   | ENSG00000235703.5  | 0.7783471    | 0.827391944  | 0.576372262  |
| AC079944.2  | ENSG00000241889.1  | 0.30820452   | 2.130034572  | 1.785220417  |
| PPM1E       | ENSG00000175175.5  | 2.465175953  | 2.536122579  | 3.34170288   |
| AL117379.1  | ENSG00000273759.1  | 0.751585316  | 1.091422037  | 0.98615706   |
| DDR2        | ENSG00000162733.16 | 6.327672665  | 3.905401315  | 5.177056409  |
| KIAA0513    | ENSG00000135709.12 | 1.906980196  | 1.454059872  | 1.71648831   |
| SEC14L1P1   | ENSG00000213693.4  | 1.415938817  | 1.524582358  | 2.628698107  |
| DTX3        | ENSG00000178498.15 | 4.388213225  | 2.453874267  | 6.098862528  |
| ARPC4-TTLL3 | ENSG00000250151.9  | 0.636917402  | 1.881321709  | 1.371767241  |
| AL591845.1  | ENSG00000116883.8  | 1.0651242    | 1.376846916  | 0.518261388  |
| GATA2       | ENSG00000179348.11 | 3.984752383  | 2.631363315  | -0.582823172 |
| FGFR4       | ENSG00000160867.14 | 3.152619322  | 4.598513633  | -0.744622106 |
| GNRHR2      | ENSG00000211451.12 | 0.71231165   | 0.533635658  | 0.447433852  |
| AL117336.3  | ENSG00000271335.5  | 2.939997761  | 1.178323657  | 1.217457672  |
| PDE10A      | ENSG00000112541.13 | 2.012430065  | 3.246350516  | 0.489171307  |
| TRAM1L1     | ENSG00000174599.5  | 2.273941923  | 2.097476451  | 1.264718873  |
| CD27-AS1    | ENSG00000215039.6  | 4.136523654  | -0.250179967 | 3.939528651  |
| HCG27       | ENSG00000206344.7  | 0.495170344  | -0.181195097 | -0.260700352 |
| SDAD1P1     | ENSG00000228451.3  | 0.940565964  | 0.609368255  | 1.129944736  |
| IL6R        | ENSG00000160712.12 | 4.611169971  | 5.178826534  | 5.621976892  |

|            |                    |              |              |              |
|------------|--------------------|--------------|--------------|--------------|
| PRRG4      | ENSG00000135378.3  | 1.552997413  | 2.865593244  | 2.919950262  |
| AC009486.1 | ENSG00000261117.1  | 0.308471505  | -0.314265349 | 1.173274601  |
| FNDC4      | ENSG00000115226.9  | 1.678119414  | 2.060091389  | 0.890684222  |
| AC099789.1 | ENSG00000225475.1  | 2.417446076  | 0.703648794  | 0.785614118  |
| AL590094.1 | ENSG00000233593.8  | -0.132649877 | 2.914292435  | 2.48675823   |
| AC007878.1 | ENSG00000281195.1  | -0.520328022 | 0.375995885  | -0.07811672  |
| MAGIX      | ENSG00000269313.5  | 0.605603611  | 1.100198225  | 0.447136267  |
| ZNF620     | ENSG00000177842.11 | 0.853176439  | 2.899853951  | 2.684625749  |
| RNU6-1016P | ENSG00000252498.1  | 0.695242712  | 1.576939081  | 1.099302549  |
| MIR3125    | ENSG00000264370.1  | 0.227864312  | 0.408466116  | 2.351554012  |
| AC244197.3 | ENSG00000241489.7  | 0.233860528  | 0.954395606  | 0.71640221   |
| MAML3      | ENSG00000196782.12 | 4.416481689  | 1.484121066  | 1.907612241  |
| AL390719.1 | ENSG00000217801.9  | 2.414098986  | 4.251174996  | 5.284531527  |
| AC135050.5 | ENSG00000262766.1  | 0.048842631  | 0.727794547  | 0.440254804  |
| AC022364.1 | ENSG00000247934.4  | 0.708256105  | 0.401179272  | 0.41313837   |
| CCDC103    | ENSG00000167131.16 | 0.918909358  | 1.442481946  | 0.734714367  |
| ZNF528-AS1 | ENSG00000269834.5  | -0.334129088 | 2.413194603  | 3.454188264  |
| AC004540.1 | ENSG00000214870.8  | 1.348426629  | 1.75940935   | 1.695253187  |
| AL355472.1 | ENSG00000231663.1  | 1.535090267  | -0.268347784 | 1.117912078  |
| METTL12    | ENSG00000214756.7  | 4.097509224  | 0.350693721  | 1.305720888  |
| AC011603.2 | ENSG00000258017.1  | 1.871518616  | 1.129699993  | -0.055726788 |
| AC099336.2 | ENSG00000236439.4  | 1.803368303  | 1.120173207  | 0.72802817   |
| AC091133.1 | ENSG00000230532.1  | -0.455482032 | 0.276062318  | 0.07434827   |
| AC008536.1 | ENSG00000270067.1  | 1.02611401   | 0.005128551  | 2.11813322   |
| AC021092.1 | ENSG00000186019.10 | 1.693874978  | -0.429079296 | -0.143650547 |
| AC097103.2 | ENSG00000248932.5  | 1.30092565   | 0.066938164  | 1.399710657  |
| ADAMTS17   | ENSG00000140470.13 | 0.466131361  | 2.235383593  | 3.706830608  |
| AC118344.2 | ENSG00000279759.1  | 0.051841871  | 0.304846162  | 0.146213636  |
| BISPR      | ENSG00000282851.1  | 1.169805304  | -0.295987288 | 1.245475933  |
| RPS6KL1    | ENSG00000198208.11 | 2.730848948  | 1.054401568  | 0.983929526  |
| AC009404.1 | ENSG00000236255.1  | 0.288385043  | 1.631470963  | 0.801610942  |
| ZNF487     | ENSG00000243660.9  | 0.429048785  | 0.261367399  | 1.439742343  |
| PTMAP5     | ENSG00000214182.5  | 1.647409705  | 1.093967374  | -0.135386835 |
| AOC2       | ENSG00000131480.8  | 1.138200511  | 3.192676448  | 0.064904435  |
| AC040970.1 | ENSG00000253210.1  | -0.265694386 | 1.582443129  | 2.940684591  |
| AL358472.3 | ENSG00000273026.1  | 0.172972051  | 1.092023475  | -0.458192998 |
| AL451085.2 | ENSG00000271380.1  | 1.499623336  | 1.285610679  | 0.328066811  |
| ADM        | ENSG00000148926.9  | 3.323704046  | 4.934348119  | 6.226946623  |
| FREM2      | ENSG00000150893.10 | 2.88568811   | -0.603462613 | 2.985571692  |
| AC125437.1 | ENSG00000267655.1  | 0.348782141  | 1.333778544  | 2.975687703  |
| SNORD12B   | ENSG00000222365.1  | 3.509902973  | 1.612844114  | 1.172634729  |
| GSTO2      | ENSG00000065621.14 | 0.858190626  | 1.493763699  | -0.519672739 |
| FRY        | ENSG00000073910.20 | 0.128061828  | 1.982114877  | 2.966014698  |
| VWA5A      | ENSG00000110002.15 | 5.207591466  | 2.432648917  | 5.105607463  |
| PDZD7      | ENSG00000186862.17 | 3.058313455  | 1.512958501  | 1.402916837  |
| LPIN3      | ENSG00000132793.11 | 1.344722732  | 4.65320158   | -0.722969804 |

|              |                    |              |              |              |
|--------------|--------------------|--------------|--------------|--------------|
| LINC00910    | ENSG00000188825.13 | 0.416528266  | 1.577490466  | 2.269146979  |
| DOCK11       | ENSG00000147251.15 | 3.270591492  | 2.662143318  | 3.795227802  |
| AC104118.1   | ENSG00000271862.1  | 1.0903279    | -0.774682312 | -0.22304696  |
| CNFN         | ENSG00000105427.9  | 1.326684716  | 1.834925467  | 0.189056039  |
| AC018809.1   | ENSG00000269894.1  | -0.32691351  | 0.612021624  | -0.344892554 |
| MIR6859-1    | ENSG00000278267.1  | 1.236674493  | 3.197083872  | 4.193807904  |
| ADAMTS6      | ENSG00000049192.14 | -0.706480478 | -0.005254605 | -0.350050054 |
| RN7SL3       | ENSG00000278771.1  | 4.028402618  | 2.964585645  | 3.498317909  |
| PRKCA        | ENSG00000154229.11 | 4.165043597  | -0.2843047   | 3.692374787  |
| AC010435.1   | ENSG00000279557.1  | 0.18072287   | 0.508651019  | 0.939463561  |
| CHKB-CPT1B   | ENSG00000254413.8  | 2.440577814  | 2.910242585  | 3.485166529  |
| AC023509.4   | ENSG00000270175.1  | 1.968852263  | 0.750669673  | -0.301117426 |
| PPIAP31      | ENSG00000217094.2  | 1.113041758  | 1.042561759  | -0.268229295 |
| MIR4653      | ENSG00000264425.1  | 1.524813784  | 2.70261617   | 0.715908468  |
| AC004520.1   | ENSG00000273237.1  | 1.955306904  | 1.379925182  | -0.033952587 |
| SPCS2P4      | ENSG00000228589.3  | 0.265321899  | 0.234491189  | -0.074792992 |
| DFNB59       | ENSG00000204311.12 | -0.467148952 | 1.716539038  | 0.883590603  |
| ZNF165       | ENSG00000197279.3  | 0.188929419  | 0.484369339  | -0.42732835  |
| AC023509.3   | ENSG00000267281.2  | 0.10726244   | 1.135502518  | -0.488234388 |
| EPHX2        | ENSG00000120915.13 | -0.607669107 | 2.162648644  | 1.792816319  |
| LINC00685    | ENSG00000226179.6  | 1.24493506   | 1.14257038   | 0.561826642  |
| AC012531.1   | ENSG00000260597.1  | 1.442301328  | 0.239750828  | -0.632499292 |
| AC126755.2   | ENSG00000233024.7  | 1.748908918  | 0.928410191  | 1.988506237  |
| CBLN3        | ENSG00000139899.10 | 0.009877833  | 0.093589415  | 0.681493914  |
| AL121832.3   | ENSG00000275437.1  | -0.168331516 | -0.164090668 | 0.508120409  |
| AC105036.3   | ENSG00000260269.5  | 1.818803406  | 1.213382202  | 1.186642941  |
| AC025594.2   | ENSG00000272899.3  | 0.576129204  | -0.580242053 | -0.3755424   |
| MTMR9LP      | ENSG00000220785.7  | -0.408978756 | 3.09142447   | 0.260816435  |
| AK9          | ENSG00000155085.15 | -0.125252442 | 2.450358283  | 2.648647548  |
| AC004877.2   | ENSG00000280149.1  | -0.871932259 | 0.65918241   | 2.720757404  |
| CAVIN4       | ENSG00000170681.6  | 0.199753154  | 1.741049856  | -0.01212     |
| AP003084.1   | ENSG00000254783.1  | 1.625149951  | 0.143209729  | 1.126229483  |
| GAREM1       | ENSG00000141441.15 | 3.5453317    | 2.87054708   | 0.678167542  |
| SNORD19      | ENSG00000222345.1  | 1.847264856  | 1.438587875  | 1.853813907  |
| AC025171.2   | ENSG00000215068.7  | 1.597798938  | 0.994059245  | -0.025865785 |
| DCST1-AS1    | ENSG00000232093.1  | 2.262741942  | 0.405229954  | -0.809278749 |
| KIAA1614-AS1 | ENSG00000232586.1  | 1.949359214  | 1.874913046  | 0.703308517  |
| SNORD14E     | ENSG00000200879.1  | 3.127982155  | 1.212636636  | 0.125841667  |
| CLDN23       | ENSG00000253958.1  | 1.357106006  | 0.784052034  | 1.381332874  |
| SLC7A7       | ENSG00000155465.18 | -0.261886921 | 1.502905289  | 1.609357167  |
| CXCL16       | ENSG00000161921.14 | 3.070637231  | 1.848549588  | 2.857030212  |
| RPL10P9      | ENSG00000233913.7  | 1.149198526  | -0.235565336 | 0.384890696  |
| ATP8B3       | ENSG00000130270.16 | 0.366410633  | 2.10510107   | 0.03537086   |
| TRPC1        | ENSG00000144935.14 | 2.278052696  | 3.081561226  | 2.543817389  |
| ST7-AS1      | ENSG00000227199.1  | -0.359835602 | -0.140359089 | 2.135593791  |
| PKN3         | ENSG00000160447.6  | 3.918006805  | 3.362685648  | 2.763167901  |

|             |                    |              |              |              |
|-------------|--------------------|--------------|--------------|--------------|
| PLCD4       | ENSG00000115556.13 | 0.703052404  | 2.130237793  | -0.616332179 |
| AC078814.1  | ENSG00000139239.7  | 0.663843894  | 0.916937442  | -0.568161929 |
| SCX         | ENSG00000260428.2  | 1.100814388  | 2.68518549   | 0.460525648  |
| EIF3CL      | ENSG00000205609.12 | 0.968410232  | 0.281189083  | 0.428019229  |
| IL12A       | ENSG00000168811.6  | 0.628652769  | 1.16889549   | -0.228678779 |
| SLC9A9      | ENSG00000181804.14 | 0.582661912  | -0.204306691 | 2.807043251  |
| RFTN2       | ENSG00000162944.10 | 0.621360418  | 1.457909096  | -0.232336035 |
| N4BP2L2-IT2 | ENSG00000281026.1  | 0.142464957  | -0.404236594 | 0.234251823  |
| LINC00623   | ENSG00000226067.6  | 5.291932753  | 3.51514799   | 3.491468963  |
| EIF5AP4     | ENSG00000234743.1  | 1.287470478  | -0.610859123 | -0.477124719 |
| KCNG3       | ENSG00000171126.7  | -0.726273075 | 3.17713166   | 1.008581727  |
| HSD17B8     | ENSG00000204228.3  | 2.397150396  | 3.240625529  | 3.204901949  |
| SHROOM4     | ENSG00000158352.15 | 3.368531868  | 2.314619951  | 1.726727325  |
| AC231981.1  | ENSG00000235078.1  | 0.308263968  | -0.399311462 | 0.383037048  |
| PRDM11      | ENSG00000019485.13 | 2.247021816  | 2.093412965  | -0.319924857 |
| RPS19P3     | ENSG00000240463.1  | -0.659834356 | 0.722312247  | 0.309900079  |
| AC005288.1  | ENSG00000266469.1  | 1.197913621  | 1.245741256  | 0.534105324  |
| AC004982.2  | ENSG00000272894.5  | -0.155062484 | 1.163122904  | 1.538386865  |
| GAS1        | ENSG00000180447.6  | 3.555764529  | 4.266501638  | -0.856878586 |
| PCDHGA1     | ENSG00000204956.5  | 2.805838724  | -0.556868432 | 2.318093089  |
| GPR137C     | ENSG00000180998.11 | -0.063677193 | -0.564302378 | 0.881543469  |
| DCLK2       | ENSG00000170390.15 | 0.28493223   | -0.590648152 | 2.429198077  |
| AC011978.2  | ENSG00000261542.1  | 0.06550526   | 0.394886695  | -0.719835087 |
| NDUFB2-AS1  | ENSG00000240889.1  | 0.798153197  | 1.449408321  | -0.103930708 |
| IRAK2       | ENSG00000134070.4  | 1.751161058  | 0.80071433   | 0.861982064  |
| ENOX2       | ENSG00000165675.16 | 4.563810995  | 5.074591852  | 4.677247607  |
| AC118344.1  | ENSG00000205041.1  | 0.865375956  | 0.989400759  | 2.237005635  |
| HECTD2      | ENSG00000165338.16 | 2.631433515  | 2.632692445  | 3.314365725  |
| LRRC56      | ENSG00000161328.10 | 1.978645058  | 1.307686895  | 0.161454565  |
| CREB5       | ENSG00000146592.16 | 0.137006816  | 5.406678285  | 3.605149649  |
| RIBC1       | ENSG00000158423.16 | 1.435376144  | 0.095313717  | 0.625911505  |
| C7orf57     | ENSG00000164746.13 | -0.096490322 | -0.607242477 | 0.27796619   |
| LRP5L       | ENSG00000100068.11 | -0.806860279 | 1.978458011  | 2.067613205  |
| LINC01144   | ENSG00000281912.1  | -0.211278823 | -0.063382072 | -0.289326354 |
| AC090587.2  | ENSG00000229368.1  | -0.563391107 | 0.666964291  | 1.859570104  |
| MIR6848     | ENSG00000284229.1  | -0.33069602  | 0.280015382  | -0.473380808 |
| PCDH18      | ENSG00000189184.11 | 2.673800831  | 0.152153008  | -0.591091004 |
| SLC25A25-AS | ENSG00000234771.3  | 1.088704575  | 1.009626433  | 0.716219453  |
| KDM8        | ENSG00000155666.11 | 2.089551473  | -0.432116113 | 0.114703389  |
| AL365203.3  | ENSG00000273038.2  | 1.016462123  | 0.955690569  | 0.308009023  |
| AC104447.1  | ENSG00000280173.1  | 1.383788507  | 0.77842384   | -0.948814554 |
| GDPD1       | ENSG00000153982.10 | 3.823909848  | 3.965914916  | 3.929203101  |
| CGN         | ENSG00000143375.14 | 1.291566616  | 3.099437367  | 2.651579035  |
| TRIM46      | ENSG00000163462.17 | 2.671551571  | 3.162579491  | -0.113989442 |
| AC009961.1  | ENSG00000226266.6  | 0.500971943  | 0.133435337  | 1.308351826  |
| CD22        | ENSG00000012124.16 | 3.01904215   | 2.495303447  | 5.73678587   |

|             |                    |              |              |              |
|-------------|--------------------|--------------|--------------|--------------|
| AC022916.1  | ENSG00000266947.1  | 0.69304535   | 0.403788538  | 0.451473041  |
| WASH5P      | ENSG00000282458.1  | -0.026404542 | 1.112967273  | 2.515750548  |
| HOXA3       | ENSG00000105997.22 | 3.95037936   | 3.363609326  | 3.409742288  |
| VILL        | ENSG00000136059.14 | 0.482613389  | -0.500091462 | 2.648328543  |
| SATB2-AS1   | ENSG00000225953.2  | 0.006304818  | 0.532977458  | 1.275338362  |
| AC099778.1  | ENSG00000260236.1  | 0.881265508  | 1.389764624  | -0.662459098 |
| TMC3-AS1    | ENSG00000259343.6  | -0.483271229 | 1.985928684  | 0.779314221  |
| L1CAM       | ENSG00000198910.12 | 4.461571546  | 8.854151667  | -0.17163405  |
| AL355001.2  | ENSG00000275964.1  | 2.80097672   | 1.375435277  | 1.361917985  |
| MIR4737     | ENSG00000264049.1  | 3.286595379  | 1.608557616  | 2.96376763   |
| AC138866.2  | ENSG00000254701.3  | 1.771465455  | 0.811779065  | 0.776218428  |
| TIAF1       | ENSG00000221995.5  | 0.217142222  | 1.019466149  | 1.587926499  |
| AC011477.2  | ENSG00000267481.1  | 1.013321811  | 1.005651779  | 0.404848419  |
| VAV3        | ENSG00000134215.15 | 0.741967984  | -0.757821288 | 2.602474709  |
| C20orf204   | ENSG00000196421.8  | 1.484544779  | 0.749658334  | 0.048863647  |
| AC015912.3  | ENSG00000274213.1  | 2.185005934  | 1.94775839   | -0.341277955 |
| AC005519.2  | ENSG00000258559.2  | 0.015743546  | -0.038904176 | 1.40232429   |
| APOL1       | ENSG00000100342.20 | 1.02844692   | -0.696639965 | 1.343443894  |
| CPEB3       | ENSG00000107864.14 | -0.034544894 | 0.169497517  | 0.755763923  |
| BMS1P1      | ENSG00000204177.10 | 0.429235936  | -0.167987446 | 0.075769043  |
| RBM26-AS1   | ENSG00000227354.6  | 1.144548718  | -0.040204231 | 0.371525517  |
| INTS6-AS1   | ENSG00000236778.7  | 1.04016788   | -0.115123428 | 0.763261125  |
| GOLGA6L9    | ENSG00000197978.9  | 0.58186095   | 0.513232702  | 2.228125626  |
| AL606834.3  | ENSG00000270062.1  | -0.232567553 | 1.670261678  | 2.183535671  |
| AL136018.1  | ENSG00000258657.5  | 3.725070475  | 3.33981195   | 1.769046576  |
| C1QL1       | ENSG00000131094.3  | 2.765186093  | -0.182445681 | -0.629007527 |
| DTX2P1-UPK3 | ENSG00000265479.6  | 1.163178286  | 1.443596082  | 0.329639172  |
| PCF11-AS1   | ENSG00000269939.1  | 1.562020459  | 0.713461092  | 0.32030551   |
| PPT2-EGFL8  | ENSG00000258388.7  | 1.850583213  | 2.272109055  | 2.401263939  |
| PPP1R13L    | ENSG00000104881.15 | 1.910459806  | 0.665413061  | 1.488513656  |
| ABHD14A-AC  | ENSG00000114786.16 | 2.347583782  | 1.71056007   | -0.396142398 |
| FGD6        | ENSG00000180263.13 | 2.032639115  | 0.747121068  | -0.436317787 |
| CASZ1       | ENSG00000130940.14 | 1.079133063  | 0.527095243  | 2.197440655  |
| PLS3-AS1    | ENSG00000271826.5  | -0.466617325 | 1.174882739  | -0.503612023 |
| HIST1H2BN   | ENSG00000233822.4  | 0.759807678  | 1.170087974  | -0.371024379 |
| BCYRN1      | ENSG00000236824.2  | 1.638705678  | 3.600194038  | -0.175548001 |
| AC096677.1  | ENSG00000224536.2  | -0.088890933 | -0.657655434 | 1.766997543  |
| AC036214.2  | ENSG00000272518.1  | -0.131572215 | 1.905446111  | 2.221483379  |
| MRPS31P5    | ENSG00000243406.6  | 2.520401083  | 2.265739113  | 3.337209167  |
| GRHL1       | ENSG00000134317.17 | 1.015917085  | 1.356859899  | 2.05711253   |
| AL139099.1  | ENSG00000244270.1  | 0.230242333  | -0.331900445 | 0.05642905   |
| LPAR2       | ENSG00000064547.13 | 2.646634888  | 3.78058223   | 2.776409956  |
| HIST1H2AG   | ENSG00000196787.3  | -0.624431734 | 1.349500886  | -0.62467209  |
| AC004951.1  | ENSG00000228434.1  | 0.139579712  | 0.175623989  | -0.075520634 |
| SNORD124    | ENSG00000238793.1  | 0.281667066  | 0.898039309  | 2.215511734  |
| ZNF429      | ENSG00000197013.9  | 1.830090132  | 3.024432546  | -0.189803668 |



|            |                    |              |              |              |
|------------|--------------------|--------------|--------------|--------------|
| LINC02246  | ENSG00000281903.2  | -0.008506619 | -0.098982432 | -0.56077945  |
| PITPNM2    | ENSG00000090975.12 | 3.925960934  | 1.786417138  | 4.469884136  |
| AL136040.2 | ENSG00000273783.1  | 0.4067947    | -0.311911724 | -0.069376665 |
| ZXDA       | ENSG00000198205.6  | -0.577929128 | -0.067504955 | 1.41924119   |
| AC008915.2 | ENSG00000260136.5  | 2.590330103  | 1.609994707  | 1.200971944  |
| AC006213.4 | ENSG00000277806.1  | 0.842391409  | 0.507773835  | -0.683320084 |
| C2orf27A   | ENSG00000197927.12 | 1.447430242  | 1.825115902  | -0.761619188 |
| ACER2      | ENSG00000177076.5  | 1.365791343  | 0.570152833  | 0.928949193  |
| LINC01117  | ENSG00000224577.1  | -0.268464697 | 1.245896964  | 1.316773835  |
| P2RY1      | ENSG00000169860.6  | 2.080298902  | 1.791814221  | -0.071426465 |
| MYH14      | ENSG00000105357.15 | 4.472042336  | 4.898629741  | -0.133328898 |
| AC135721.2 | ENSG00000267681.1  | 1.231794745  | 1.623191795  | 3.825229583  |
| APLF       | ENSG00000169621.9  | -0.995730486 | 1.829247638  | 1.620731789  |
| RPL4P4     | ENSG00000229638.1  | 0.416910249  | 0.103608665  | 0.275430787  |
| KIF5C      | ENSG00000168280.16 | 2.857582726  | 5.844643905  | 2.705834872  |
| AC040977.1 | ENSG00000262089.1  | 0.267940105  | 1.647653523  | 1.149447519  |
| AL590666.2 | ENSG00000229953.1  | 5.897972684  | 1.275010722  | -0.580403604 |
| MIF-AS1    | ENSG00000218537.1  | 1.210403289  | 0.023609444  | 0.292718221  |
| AL031985.3 | ENSG00000260920.2  | 3.31190197   | -0.159958534 | -0.067074803 |
| CSPG5      | ENSG00000114646.9  | 0.558875269  | 0.020398202  | 0.757829892  |
| PPFIBP2    | ENSG00000166387.11 | -0.972094837 | 4.349354152  | 4.26189132   |
| AC023813.3 | ENSG00000260052.1  | 0.137227639  | -0.528121744 | 1.555299432  |
| AC084125.4 | ENSG00000265393.1  | 0.587859238  | -0.894791401 | 0.215058302  |
| OCLM       | ENSG00000262180.1  | 0.593589345  | -0.063167351 | 0.190612451  |
| PCDHB5     | ENSG00000113209.8  | 4.025359228  | -0.055163432 | 2.05087131   |
| MTCO2P2    | ENSG00000267541.1  | -0.291569817 | 0.232576627  | 0.723207272  |
| AL022394.1 | ENSG00000272407.1  | 1.345410213  | 0.324409934  | 2.360709546  |
| LRRC37A2   | ENSG00000238083.7  | 0.105844526  | 0.083025101  | 1.800073578  |
| AC090616.6 | ENSG00000266777.1  | -0.102568808 | 1.285538075  | 1.440780694  |
| ZNF404     | ENSG00000176222.8  | 0.258436657  | 0.13717052   | 2.474029174  |
| POU3F2     | ENSG00000184486.9  | 4.870497532  | 2.347362306  | -0.523310473 |
| AC020917.4 | ENSG00000280332.1  | -0.09896084  | 1.692062498  | 0.028961733  |
| GPR63      | ENSG00000112218.8  | -0.147108342 | 0.961073847  | 1.333625018  |
| AGBL2      | ENSG00000165923.15 | 0.178302862  | 0.916922387  | 1.547013898  |
| CSPG4      | ENSG00000173546.7  | 7.984866699  | 6.858087162  | 6.605470107  |
| ADCY10P1   | ENSG00000161912.17 | -0.19860043  | 1.086023879  | 0.633215087  |
| AC007000.1 | ENSG00000213542.3  | 0.929065868  | 0.207301702  | 1.822763251  |
| EYA1       | ENSG00000104313.17 | 5.862672299  | 1.082147476  | -0.979487291 |
| AKNA       | ENSG00000106948.16 | 2.522768327  | 2.516033266  | 3.829620303  |
| MIR6783    | ENSG00000278223.1  | -0.227426998 | 0.531878092  | -0.55863122  |
| AC073415.1 | ENSG00000227470.1  | 1.316928031  | 0.889291412  | -0.406615444 |
| PHYHIP     | ENSG00000168490.13 | 2.128787261  | 0.769691384  | -0.609995745 |
| LAMA1      | ENSG00000101680.14 | -0.923038475 | 7.428976737  | 4.691454798  |
| FCRLA      | ENSG00000132185.16 | 5.174628307  | 5.692404333  | -0.764798434 |
| THBS1      | ENSG00000137801.10 | 7.667230227  | 3.1985246    | 1.275883361  |
| MIR6759    | ENSG00000283621.1  | 1.314437733  | 1.107841976  | 3.591656776  |

|            |                    |              |              |              |
|------------|--------------------|--------------|--------------|--------------|
| AC009812.4 | ENSG00000260317.1  | 0.155489789  | -0.856357478 | -0.874041316 |
| MYADM      | ENSG00000179820.15 | 6.504125467  | 4.8697648    | -0.853568569 |
| EEF1B2P3   | ENSG00000232472.1  | 0.224442138  | 0.708490567  | -0.726170158 |
| TNKS2-AS1  | ENSG00000228701.1  | 0.780044159  | 0.066444027  | -0.174152575 |
| N4BP2L1    | ENSG00000139597.17 | 1.972694019  | 0.080257464  | 3.120388166  |
| AC092115.3 | ENSG00000262136.1  | 0.745502986  | 1.059665785  | 0.416427677  |
| DNM3       | ENSG00000197959.13 | 3.766932357  | 0.004227508  | 1.048433945  |
| RASSF1-AS1 | ENSG00000281358.1  | -0.157610369 | 0.0807588    | -1.052365167 |
| SAMD13     | ENSG00000203943.8  | 0.909595041  | 0.076459378  | 1.716830619  |
| PLCB4      | ENSG00000101333.16 | 2.432368711  | 4.372901323  | 5.648556598  |
| B3GNT5     | ENSG00000176597.11 | 4.175341477  | 2.971941171  | 2.113634863  |
| HMGNI1P4   | ENSG00000224040.1  | 0.57371601   | -0.160683839 | -0.391268734 |
| AL031963.3 | ENSG00000272277.1  | 0.957807244  | 0.164154548  | 0.008475733  |
| RAB7B      | ENSG00000276600.4  | 4.891734333  | 0.100423242  | -0.77850442  |
| CTSV       | ENSG00000136943.10 | -0.375541113 | 5.053411776  | 2.89749151   |
| ZNF285     | ENSG00000267508.5  | 0.176816453  | 0.4575148    | -0.323086801 |
| HOXD3      | ENSG00000128652.11 | 0.325790492  | 0.862353923  | 2.403527365  |
| PKD1P1     | ENSG00000244257.5  | -0.284783923 | -0.313779607 | -0.60253876  |
| ZNF117     | ENSG00000152926.14 | 1.150716993  | 0.092359904  | 0.826078134  |
| FAM27C     | ENSG00000154537.4  | 1.463752203  | 0.121662832  | 1.038284833  |
| C12orf45   | ENSG00000151131.10 | 2.951934528  | 1.725944023  | -0.264861932 |
| AC098934.1 | ENSG00000214796.8  | 2.923749888  | 1.164274277  | -0.554534411 |
| FZD6       | ENSG00000164930.11 | 5.59982844   | 5.846634311  | 6.115905073  |
| AC104958.2 | ENSG00000272502.1  | 4.643289426  | 0.428976749  | 4.04310143   |
| AP001033.2 | ENSG00000273284.1  | 0.023109149  | 2.184693395  | 1.836120267  |
| AC098934.2 | ENSG00000234996.4  | 1.024422256  | 0.496468656  | -0.811973562 |
| DOCK9-AS2  | ENSG00000260992.1  | -0.433508784 | -0.812244873 | 0.673289376  |
| TMTC2      | ENSG00000179104.8  | 5.548612497  | 5.130313424  | 5.040406458  |
| DPY19L1P1  | ENSG00000229358.3  | -0.329130993 | 0.128127808  | -0.507197045 |
| ARHGEF17   | ENSG00000110237.3  | 2.631933263  | 4.514089325  | -0.766661931 |
| CLMN       | ENSG00000165959.11 | 4.144433077  | 2.480681012  | -0.467435927 |
| RRN3P2     | ENSG00000103472.10 | 0.642836205  | 0.08225421   | 0.526968306  |
| CTSS       | ENSG00000163131.10 | 1.164753203  | 1.374427127  | -0.772437257 |
| RPL12P16   | ENSG00000204196.5  | 1.023591529  | 1.63088872   | -0.072811922 |
| AC106795.1 | ENSG00000170089.15 | 4.108326611  | -0.484320225 | 1.532504025  |
| AP001462.1 | ENSG00000269038.1  | 1.005750321  | 0.254496264  | 1.17028734   |
| PLCXD2     | ENSG00000240891.7  | -0.822739013 | 0.506839359  | 2.852851014  |
| PCDHB2     | ENSG00000112852.6  | 2.775899814  | 1.071685603  | 2.369945688  |
| PALM2      | ENSG00000243444.7  | 1.601618808  | 3.037170522  | 1.235370555  |
| SNAI1      | ENSG00000124216.3  | 5.421401642  | 1.805096612  | 4.06305145   |
| AC136469.2 | ENSG00000279827.1  | 0.56190279   | -0.039939315 | -0.657518846 |
| LNP1       | ENSG00000206535.7  | 1.736404895  | 2.450152141  | -0.490382851 |
| AL136295.6 | ENSG00000276698.1  | -0.323315517 | -0.475191132 | -0.035134746 |
| BMP7       | ENSG00000101144.12 | 1.001198153  | 2.043263005  | 7.294503338  |
| AKAP6      | ENSG00000151320.10 | -0.161121787 | 0.418171506  | 1.509613317  |
| AC083862.2 | ENSG00000272941.1  | -0.502242605 | 1.14676777   | 3.019688105  |

|            |                    |              |              |              |
|------------|--------------------|--------------|--------------|--------------|
| DCT        | ENSG00000080166.15 | -0.200430957 | 7.856216485  | 2.084110608  |
| AC139100.2 | ENSG00000278000.1  | 0.137466411  | 0.951915958  | 0.293890734  |
| C1orf220   | ENSG00000213057.5  | 0.770145844  | 0.083711499  | -0.583189812 |
| PDGFC      | ENSG00000145431.10 | 2.263607648  | -0.063788359 | 4.127552973  |
| IKZF2      | ENSG00000030419.16 | 1.891931588  | -0.129728077 | 2.750832258  |
| CTXND1     | ENSG00000259417.2  | 1.167132276  | 2.473879687  | 4.129958702  |
| FNBP1P1    | ENSG00000257800.1  | 1.837196803  | 1.728686484  | 0.563949459  |
| ST8SIA1    | ENSG00000111728.10 | -0.859747076 | 3.871260663  | 5.107536436  |
| AC055855.1 | ENSG00000240821.1  | 1.354104592  | 0.609654663  | 1.646450842  |
| AL590235.1 | ENSG00000261643.1  | 0.026773794  | 0.235702066  | 2.437449772  |
| SRCIN1     | ENSG00000277363.4  | 4.092371361  | 4.074094485  | 1.206861272  |
| HIST1H3H   | ENSG00000278828.1  | -0.460996018 | 1.340394239  | -1.091380699 |
| CEACAM1    | ENSG00000079385.21 | -0.574957554 | 4.977367934  | 4.874176419  |
| MIR6781    | ENSG00000278447.1  | 0.88965004   | 1.666730965  | 0.314491791  |
| AC007906.2 | ENSG00000277639.2  | 0.811993522  | 1.412772064  | 3.793191146  |
| HIST1H2BJ  | ENSG00000124635.8  | 1.068254854  | 2.242673099  | -0.338614895 |
| AC020915.2 | ENSG00000267216.1  | 0.81525143   | 1.462265924  | 1.509373599  |
| AC006213.2 | ENSG00000267058.1  | -0.20824805  | 0.577193736  | 1.39356131   |
| PAIP2B     | ENSG00000124374.8  | -0.320167557 | 0.032251138  | 1.01838172   |
| SIM2       | ENSG00000159263.15 | -0.504653276 | 2.757702675  | -0.048423839 |
| MIR7111    | ENSG00000276712.1  | 2.649139225  | 2.038558861  | 0.131235914  |
| AC145422.1 | ENSG00000256742.1  | 1.239975611  | 1.839456451  | 1.214327139  |
| AC093788.1 | ENSG00000273449.1  | 0.115544429  | -0.670390336 | -0.280786281 |
| EEF1A1P19  | ENSG00000249855.1  | 0.165870443  | -0.03687246  | -0.64942802  |
| CHST7      | ENSG00000147119.3  | 2.58335144   | 2.554614181  | 0.667238578  |
| MIR641     | ENSG00000207631.1  | 1.439797718  | 1.406214395  | 2.580592829  |
| HIST1H2AM  | ENSG00000278677.1  | 1.084847373  | 0.764054007  | -0.624960143 |
| CATSPER2P1 | ENSG00000205771.6  | 0.777980968  | 0.990046418  | 1.365497983  |
| LSR        | ENSG00000105699.16 | 1.284110313  | 2.633285876  | 6.084515861  |
| AP005136.2 | ENSG00000266783.1  | 0.261400419  | 0.352581839  | -0.019116208 |
| AC017116.1 | ENSG00000239775.1  | 1.6484411    | 1.552639274  | -0.370032839 |
| ANKRD29    | ENSG00000154065.16 | 3.583243017  | 2.119512796  | -0.675064009 |
| CCDC96     | ENSG00000173013.5  | 0.950478805  | 0.453356925  | 0.315652086  |
| LINC00893  | ENSG00000241769.7  | 2.179928223  | 1.947032391  | 1.115581174  |
| PRX        | ENSG00000105227.14 | 0.482361318  | 0.947485435  | 1.050416883  |
| ATP6AP1L   | ENSG00000205464.11 | -0.956570756 | 1.146626141  | 2.774830772  |
| ZNF284     | ENSG00000186026.6  | 2.764746705  | 1.589751366  | 0.483936599  |
| C1R        | ENSG00000159403.15 | 3.766921429  | 2.946034174  | -0.770139003 |
| AL117332.1 | ENSG00000275457.1  | 2.057308428  | 1.172190439  | -1.139816034 |
| FOXD1      | ENSG00000251493.4  | 4.956711993  | 1.963563985  | -0.712146278 |
| SHOX2      | ENSG00000168779.19 | 3.573470522  | 4.207578021  | 3.365719632  |
| STK32B     | ENSG00000152953.12 | 5.043220204  | 3.395522999  | 6.380834776  |
| AC099850.1 | ENSG00000224738.1  | -0.208678504 | 0.594562208  | 0.102844999  |
| GOLGA2P5   | ENSG00000238105.7  | 1.021442115  | 0.284965848  | -0.700452777 |
| PPARGC1A   | ENSG00000109819.8  | -0.853330093 | 4.976498755  | 5.9701361    |
| AC120057.5 | ENSG00000279812.1  | 1.860387854  | 1.492020997  | 0.747032428  |

|            |                    |              |              |              |
|------------|--------------------|--------------|--------------|--------------|
| AL645941.1 | ENSG00000223837.2  | 0.822495073  | 0.422949818  | 0.871014599  |
| AC133552.2 | ENSG00000262587.2  | 0.916121669  | -0.577793413 | 0.314867665  |
| ZNF773     | ENSG00000152439.12 | 1.797865831  | 0.092146939  | 2.597056721  |
| NUP210     | ENSG00000132182.11 | 3.037345413  | 5.032447214  | 4.705008387  |
| AC016739.1 | ENSG00000218175.2  | 1.147536728  | 0.014197934  | 0.892163221  |
| SLC16A7    | ENSG00000118596.11 | 3.803262342  | -0.694205614 | 4.822845462  |
| AC097376.2 | ENSG00000273247.5  | 0.475293853  | -0.485415689 | 0.971630695  |
| RPL24P4    | ENSG00000181524.6  | 0.662296467  | -0.20816465  | -0.380765872 |
| TRIM22     | ENSG00000132274.15 | -0.334896059 | 2.087715709  | 0.092773856  |
| AXIN2      | ENSG00000168646.12 | 0.05315587   | 1.870749563  | 5.597425413  |
| AC010359.1 | ENSG00000269961.1  | -0.531050313 | 0.569551857  | 0.353167018  |
| AC019080.1 | ENSG00000213963.6  | -0.791460212 | 0.982035842  | 0.851403837  |
| CIART      | ENSG00000159208.15 | -0.531602462 | 3.902069626  | 3.814436975  |
| DUSP2      | ENSG00000158050.4  | 2.536896399  | 2.188393998  | -0.673360979 |
| AC005538.2 | ENSG00000279809.1  | -0.50123402  | -0.730599973 | -1.058208259 |
| AL353625.1 | ENSG00000213073.4  | -0.500490695 | 0.892041581  | 2.489762996  |
| AC105760.2 | ENSG00000227252.1  | -0.495047342 | 1.140728017  | -0.50327098  |
| AC073073.2 | ENSG00000272604.1  | 2.128032682  | 1.021004602  | -0.994049259 |
| ATP5EP2    | ENSG00000180389.6  | 0.239883158  | -0.492462785 | 0.161682881  |
| FKBP1C     | ENSG00000198225.5  | 0.412115037  | 0.661575591  | -0.942560734 |
| SH3BGRL2   | ENSG00000198478.7  | 2.085484384  | 2.113008137  | 2.607288452  |
| DGCR6      | ENSG00000183628.12 | -0.518343221 | 2.939859654  | 2.1326553    |
| SNORD12C   | ENSG00000209042.1  | 2.642548931  | 0.879799086  | -0.121870846 |
| ATRIP      | ENSG00000164053.19 | 4.245320807  | 3.070622773  | 0.781820169  |
| LRRC75A    | ENSG00000181350.11 | -1.126047373 | 0.915839124  | 4.454571463  |
| LINC00863  | ENSG00000224914.3  | 1.623475545  | -0.650212676 | 0.888446919  |
| FAM124A    | ENSG00000150510.16 | 1.639035935  | 3.35993187   | 2.109048188  |
| FTH1P3     | ENSG00000213453.3  | -0.798300596 | -0.996079064 | -0.223499436 |
| AC100814.1 | ENSG00000272010.1  | -0.270291816 | 0.744584367  | 1.272016498  |
| AL669831.1 | ENSG00000228327.3  | 0.093836168  | 0.514966943  | -0.472969656 |
| PSMB8-AS1  | ENSG00000204261.8  | 0.982499094  | -0.580778607 | -0.322907492 |
| AC060780.2 | ENSG00000267340.1  | 1.721641017  | 1.720539379  | 2.423977852  |
| SCG2       | ENSG00000171951.4  | 3.04759525   | 3.390291663  | -0.958156658 |
| SCARNA7    | ENSG00000238741.1  | -0.119337375 | 1.626539494  | 1.036209378  |
| MAT1A      | ENSG00000151224.12 | -0.288129667 | -0.055632411 | 3.131563185  |
| AC016586.1 | ENSG00000268670.1  | 0.269176586  | 0.79545676   | 0.495731468  |
| ZBTB46     | ENSG00000130584.10 | 0.048690602  | -0.720880244 | 3.604974439  |
| AC016773.1 | ENSG00000270195.1  | 1.003287718  | -0.77605165  | 2.19078401   |
| RN7SL809P  | ENSG00000241217.3  | 0.511923351  | 0.008240468  | -0.237091336 |
| SEMA6D     | ENSG00000137872.16 | -0.389845613 | 4.574305559  | 2.592211234  |
| AL158212.3 | ENSG00000260917.1  | 1.842915633  | 1.265392135  | 2.243640407  |
| 44075      | ENSG00000180096.11 | -0.129897889 | -0.91014001  | -0.497493969 |
| FAM72D     | ENSG00000215784.5  | 3.134076126  | 0.948324158  | -0.519559169 |
| VASN       | ENSG00000168140.4  | 0.153720149  | 0.274024024  | -0.936355466 |
| CAHM       | ENSG00000270419.1  | -0.142737529 | 0.423296273  | 1.208770642  |
| AC073195.1 | ENSG00000271855.1  | -1.149876179 | 0.093697893  | 0.299756034  |

|            |                    |              |              |              |
|------------|--------------------|--------------|--------------|--------------|
| C16orf86   | ENSG00000159761.14 | 2.569488718  | -0.103530932 | -0.305288265 |
| KCNK15-AS1 | ENSG00000244558.5  | 0.083164031  | 0.38980001   | -0.133636426 |
| NCKAP5     | ENSG00000176771.16 | 2.148044983  | 2.172967146  | 0.295668795  |
| AC023157.3 | ENSG00000276900.1  | 1.354642304  | 0.808944569  | -0.775626556 |
| AC010245.2 | ENSG00000272040.1  | -0.581440173 | -0.784252536 | 0.461134126  |
| PLEKHB1    | ENSG00000021300.13 | 3.238644375  | 2.886739258  | 2.035910025  |
| AC062029.1 | ENSG00000234028.3  | 0.493362299  | 0.389299708  | -0.722696292 |
| EML6       | ENSG00000214595.11 | 1.879074828  | -0.84098467  | 1.124154795  |
| Y_RNA      | ENSG00000201555.1  | 0.464705344  | 0.675937842  | 1.399207654  |
| PGF        | ENSG00000119630.13 | 2.417934968  | 4.477090476  | 3.764297019  |
| AC016355.1 | ENSG00000270964.1  | 0.930748068  | 0.786843342  | -0.418035512 |
| ULBP2      | ENSG00000131015.4  | 4.025320151  | 1.395929691  | -1.199463219 |
| MR1        | ENSG00000153029.14 | 1.829405644  | 2.458389156  | -0.468574894 |
| THSD4      | ENSG00000187720.14 | 2.977250877  | 0.219277217  | 0.197488022  |
| PCSK1N     | ENSG00000102109.8  | 1.550097417  | 5.228550134  | 0.449015977  |
| UBAP1L     | ENSG00000246922.8  | -0.904480679 | 4.900367245  | -0.834702777 |
| SNAI3-AS1  | ENSG00000260630.6  | -0.932405908 | 2.462590955  | 1.038191493  |
| APOBEC3D   | ENSG00000243811.8  | 2.787894611  | -0.763527327 | 2.464225325  |
| AC124283.3 | ENSG00000262652.1  | -0.418637292 | -0.623446383 | 0.259584076  |
| AP000692.1 | ENSG00000228107.1  | -0.712748947 | -0.135010315 | 0.908477916  |
| VAMP5      | ENSG00000168899.4  | 6.026690179  | 0.02002952   | 5.564976159  |
| MT-TC      | ENSG00000210140.1  | 4.869056544  | 5.154581738  | 4.493939781  |
| RNU6ATAC   | ENSG00000221676.1  | 1.023623657  | 1.825094935  | 0.749425523  |
| AC123769.1 | ENSG00000226049.3  | -0.876423673 | -0.587447733 | -0.098694418 |
| RGS16      | ENSG00000143333.6  | 3.432498142  | 1.538759571  | 0.350354496  |
| AL513534.1 | ENSG00000260400.1  | 1.58392442   | 0.380346015  | -0.875088573 |
| PRRT2      | ENSG00000167371.17 | 1.889234074  | 0.209729806  | 1.212440175  |
| AC006252.1 | ENSG00000243224.1  | 1.163979563  | 1.223640143  | -0.897163138 |
| STK4-AS1   | ENSG00000227477.1  | -0.977999952 | -0.077357391 | -0.129762198 |
| AC217777.1 | ENSG00000260075.1  | -1.228952088 | 0.617823749  | 0.27643115   |
| LINC00957  | ENSG00000235314.1  | -0.955166157 | 2.837337782  | -0.401154235 |
| SNORA53    | ENSG00000212443.1  | 0.71823306   | 0.725529026  | -0.163061536 |
| MIR1244-1  | ENSG00000284378.1  | 6.022867596  | 5.573870215  | 4.898989832  |
| AC007663.4 | ENSG00000273343.1  | -0.622036161 | 0.655990181  | 0.867909973  |
| LINC00973  | ENSG00000240476.1  | 2.573310913  | 0.687468938  | 4.028512891  |
| TNFRSF10C  | ENSG00000173535.13 | 2.588531757  | 2.445590789  | -0.514223373 |
| ARHGAP20   | ENSG00000137727.12 | -0.48402591  | -0.69791587  | 0.580042372  |
| TCAP       | ENSG00000173991.5  | -0.267988748 | -0.521685518 | -0.968962824 |
| GABPB2     | ENSG00000143458.11 | 2.512215819  | 2.27463982   | -0.864921932 |
| LINC01569  | ENSG00000262468.5  | 2.164908073  | -0.016704767 | 1.259942351  |
| AC116913.1 | ENSG00000261351.2  | 1.307289886  | 0.198434907  | -0.17822442  |
| PAQR6      | ENSG00000160781.15 | 3.966538524  | 2.38530833   | -0.594472617 |
| AC233699.1 | ENSG00000261499.2  | 0.353113278  | -0.202129353 | 0.446354872  |
| HSD17B7P2  | ENSG00000099251.14 | -0.8405977   | 1.085963236  | 0.94904325   |
| DENND2C    | ENSG00000175984.14 | -0.773456831 | 1.600291517  | 1.556789981  |
| HKDC1      | ENSG00000156510.12 | 3.600672856  | -0.936207974 | 1.000979948  |

|            |                    |              |              |              |
|------------|--------------------|--------------|--------------|--------------|
| TOB1-AS1   | ENSG00000229980.4  | -0.237286464 | -0.055370729 | 1.335943066  |
| SMG1P2     | ENSG00000205534.6  | 0.530885084  | 2.264905484  | 2.398204064  |
| CDK14      | ENSG00000058091.16 | 4.857024862  | 2.218111901  | 3.585226062  |
| GNRH1      | ENSG00000147437.9  | -0.809207936 | -0.729645584 | -0.60489614  |
| ZNF891     | ENSG00000214029.4  | 0.927680917  | 0.503245731  | -0.338200175 |
| AL442125.2 | ENSG00000276916.1  | 0.470669062  | -0.870742007 | -0.379212543 |
| AC068338.3 | ENSG00000275645.1  | 1.058989002  | -0.024363271 | 1.068801096  |
| AC092279.2 | ENSG00000279425.1  | 0.607704368  | -0.095734512 | -0.670297532 |
| CCDC30     | ENSG00000186409.14 | -0.335991747 | 1.052864599  | 0.722024885  |
| CCDC140    | ENSG00000163081.2  | -1.049710324 | 0.794721194  | 1.774439179  |
| PYROXD2    | ENSG00000119943.12 | 4.942865414  | 2.094025521  | 9.567119649  |
| AC024293.1 | ENSG00000244313.3  | 1.675077201  | 1.37707186   | 0.345648027  |
| NUPR1      | ENSG00000176046.8  | -0.884665404 | 3.870119662  | 7.957610565  |
| FLG-AS1    | ENSG00000237975.6  | 3.339924614  | 2.461568068  | -1.124865307 |
| CPQ        | ENSG00000104324.15 | -0.638327227 | 5.840153808  | 5.698839163  |
| AL132780.5 | ENSG00000280129.1  | -0.163227796 | -0.124545827 | 0.102024064  |
| AC104986.2 | ENSG00000253948.1  | 1.582629313  | 0.566519798  | 0.44147896   |
| ZNF337-AS1 | ENSG00000213742.6  | 1.633223199  | 0.665533786  | -0.11333978  |
| AC008969.1 | ENSG00000176593.7  | -0.367222706 | -0.568101894 | 2.044593255  |
| RASSF5     | ENSG00000266094.7  | 1.998732682  | -0.5499412   | 1.838862103  |
| AC109347.1 | ENSG00000260526.1  | -0.713597503 | -0.323377279 | 0.809343737  |
| AC009245.1 | ENSG00000230383.1  | 1.172159662  | -0.490604668 | -0.368318632 |
| BMS1P10    | ENSG00000237238.2  | 3.803232729  | 1.720012069  | 3.389034278  |
| KCND1      | ENSG00000102057.9  | 1.179766118  | 0.756540343  | 1.132675007  |
| PSMD6-AS2  | ENSG00000239653.1  | -0.200021753 | -0.173335682 | 0.386063402  |
| KSR1       | ENSG00000141068.13 | 2.463073621  | 2.892464768  | -0.786139407 |
| AQP11      | ENSG00000178301.3  | -0.821310744 | 0.09419216   | 1.216977219  |
| AC006330.1 | ENSG00000280388.1  | -0.429664702 | 0.902785988  | -0.718511412 |
| TLN2       | ENSG00000171914.16 | 2.282733957  | -0.712902584 | 5.470620609  |
| GPC1       | ENSG00000063660.8  | 5.514307729  | 4.833643664  | -0.699289869 |
| AL353804.1 | ENSG00000228906.1  | 0.286376381  | -0.140730968 | 0.859402094  |
| TMEM121    | ENSG00000184986.10 | 3.428605513  | 2.897735378  | 0.396325232  |
| SGMS1-AS1  | ENSG00000226200.6  | -0.35783654  | -0.99859778  | 0.128286256  |
| PRSS12     | ENSG00000164099.3  | 3.504419305  | 3.685864497  | 3.354441722  |
| B3GNT9     | ENSG00000237172.3  | -1.14200763  | 2.609113144  | 1.860620279  |
| AC107959.1 | ENSG00000245025.2  | -0.144799373 | -0.599167246 | -0.342107889 |
| ATP2A1     | ENSG00000196296.13 | 0.87237085   | 0.662826938  | 0.737417226  |
| HNRNPA1L2  | ENSG00000139675.11 | -0.166476649 | -0.910876699 | -0.22769598  |
| BST2       | ENSG00000130303.12 | 1.851850908  | -0.615125904 | 1.543500486  |
| AC011468.1 | ENSG00000260160.1  | -0.569974158 | 2.613178268  | 0.008720517  |
| LEF1-AS1   | ENSG00000232021.6  | -0.673917794 | 2.772647111  | 2.843246529  |
| AL391069.3 | ENSG00000237976.1  | 1.833759899  | -0.156421679 | 0.887854842  |
| EIF4BP7    | ENSG00000225031.1  | 1.144811086  | -0.366617531 | -0.352435762 |
| ITGB1BP2   | ENSG00000147166.10 | 0.408329462  | 0.109540343  | -0.788201234 |
| FAM107B    | ENSG00000065809.13 | 4.188324966  | 3.558173792  | -0.747889679 |
| GHRLOS     | ENSG00000240288.7  | -0.070309214 | 0.790035559  | -0.820917636 |

|            |                    |              |              |              |
|------------|--------------------|--------------|--------------|--------------|
| AC009120.1 | ENSG00000239763.2  | 1.264120695  | 2.173849985  | 0.066970699  |
| AC079414.3 | ENSG00000276007.1  | 0.359753492  | -0.169864201 | -0.534585876 |
| SLC29A4    | ENSG00000164638.10 | -0.875582712 | 3.707437587  | 1.151557795  |
| AC144548.2 | ENSG00000258210.1  | 0.219162508  | 0.186625422  | -0.939347116 |
| MIR6739    | ENSG00000277681.1  | 1.542500095  | 0.258768469  | -0.508069355 |
| SYPL1P2    | ENSG00000265683.1  | 0.266578973  | 0.661225273  | 0.113659992  |
| SAMMSON    | ENSG00000240405.6  | 2.570897184  | 2.268181928  | 1.547051916  |
| TAGLN      | ENSG00000149591.16 | 0.893680488  | 0.570750039  | 0.376521017  |
| AC022211.3 | ENSG00000265800.1  | 0.555982938  | -0.176095647 | -0.960086129 |
| AC064875.1 | ENSG00000225649.5  | 2.869114154  | 4.151094902  | 4.291302186  |
| TMC6       | ENSG00000141524.15 | 3.716422214  | 7.078078759  | 7.067256257  |
| AC138207.4 | ENSG00000264456.1  | -0.081601123 | -0.26937903  | 0.546902022  |
| C1GALT1C1L | ENSG00000223658.7  | 1.043254587  | 1.42170275   | 2.501052933  |
| FTH1P11    | ENSG00000237264.4  | -0.541161649 | 0.327654937  | -0.320684209 |
| PARD6G-AS1 | ENSG00000267270.5  | 0.967724798  | 0.038536194  | 0.597580694  |
| SNORD94    | ENSG00000208772.1  | 0.406963047  | 2.165299348  | 0.797751161  |
| RINL       | ENSG00000187994.13 | 3.080243943  | 3.555844015  | 4.318181251  |
| BX322639.1 | ENSG00000215146.4  | 2.067208785  | 1.442781192  | -1.362941512 |
| ROPN1      | ENSG00000065371.17 | 2.298928118  | 2.418892306  | 2.319066523  |
| AL031673.1 | ENSG00000278383.1  | 1.246971914  | -0.889269499 | 0.002205169  |
| AC026362.1 | ENSG00000256028.2  | 1.171529011  | 0.440183492  | 2.719043512  |
| AC010615.1 | ENSG00000213976.4  | -0.005805738 | -0.802779227 | -0.788240158 |
| POLR2J4    | ENSG00000214783.9  | 1.047300044  | 1.178485064  | 1.266708781  |
| MTRNR2L12  | ENSG00000269028.3  | -0.347888566 | 1.456102639  | 2.486296911  |
| AL355987.4 | ENSG00000273066.5  | -0.185191077 | -0.031105569 | 0.899081801  |
| DLEU2L     | ENSG00000116652.6  | -0.143516937 | 0.94517565   | -0.433657348 |
| HMGA1P8    | ENSG00000233155.1  | 3.117265664  | 0.92891539   | -0.112198309 |
| UQCRHL     | ENSG00000233954.6  | -0.127027768 | -0.786268387 | -1.209630786 |
| AC025423.2 | ENSG00000256664.1  | -0.857103531 | -0.870120622 | -0.941893352 |
| AC127502.1 | ENSG00000215302.8  | -0.546450819 | 0.977693286  | 0.662639066  |
| HAS3       | ENSG00000103044.10 | 2.766988932  | -0.230350565 | -0.570714991 |
| AC253536.3 | ENSG00000232545.1  | 0.005323313  | 0.047118126  | 0.18745368   |
| HPSE       | ENSG00000173083.14 | 1.523721476  | 1.998511113  | 2.195595361  |
| NUAK2      | ENSG00000163545.8  | 1.418843394  | -1.097610491 | 0.054877909  |
| AC111170.3 | ENSG00000279801.1  | 0.042153406  | 1.172955691  | 0.578824728  |
| HMGB1P3    | ENSG00000250011.1  | -0.394112383 | -0.719951029 | -0.344443215 |
| FAM20C     | ENSG00000177706.8  | 7.337568814  | -1.09050196  | 4.445145809  |
| PTMAP2     | ENSG00000197744.5  | 1.002270322  | 0.584448308  | -0.332846782 |
| AL359643.3 | ENSG00000272142.1  | 1.915582226  | -0.826321319 | 0.890534777  |
| AL008729.1 | ENSG00000215022.7  | -0.665112125 | 2.271797497  | 1.506986227  |
| TRO        | ENSG00000067445.20 | -0.676842049 | 3.563823526  | 3.531127957  |
| NBDY       | ENSG00000204272.12 | 5.164786537  | 5.413189863  | 5.082135523  |
| AC008669.1 | ENSG00000260686.1  | -0.23521608  | 0.189376766  | 0.020940622  |
| AC010522.1 | ENSG00000268750.6  | 1.82837715   | 0.801708064  | 0.885277311  |
| IRF5       | ENSG00000128604.19 | 0.505702376  | 3.725380275  | 3.699277936  |
| AC145207.9 | ENSG00000278876.1  | 0.961704869  | 0.965742641  | -0.243390686 |

|            |                    |              |              |              |
|------------|--------------------|--------------|--------------|--------------|
| AL133338.1 | ENSG00000260000.2  | 1.031431589  | -0.538186507 | 0.335642246  |
| YPEL2      | ENSG00000175155.8  | 1.274883739  | 1.148813276  | 1.374651591  |
| NR2F1-AS1  | ENSG00000237187.8  | 1.299399582  | -0.118212236 | 2.537001349  |
| CDKL1      | ENSG00000100490.9  | 2.802266355  | 0.688463285  | -0.210861959 |
| AC027373.1 | ENSG00000260368.1  | -0.619416441 | -0.406049131 | -0.551715298 |
| FAM19A2    | ENSG00000198673.10 | 2.853224015  | -0.255712084 | 1.738053218  |
| AL162386.2 | ENSG00000234740.1  | 0.273283675  | 0.047399414  | -0.787742651 |
| AL132639.2 | ENSG00000258940.2  | 0.241737014  | -0.499110888 | -0.356741253 |
| C1orf54    | ENSG00000118292.8  | 0.1329699    | 1.884210836  | 1.730958796  |
| AC009120.2 | ENSG00000259972.2  | 2.817166658  | 2.973334641  | 1.144125967  |
| AC090948.1 | ENSG00000271964.1  | -0.219416852 | 0.063130773  | -0.62837153  |
| FYB1       | ENSG00000082074.15 | 1.225140689  | 3.973455369  | 1.631852683  |
| FKBP5      | ENSG00000096060.14 | 4.523545598  | 3.697219987  | 5.334107079  |
| AC079848.1 | ENSG00000250012.1  | -0.161285185 | 0.799521475  | 0.712596287  |
| TCEA1P4    | ENSG00000236184.1  | 0.354434409  | 0.076976992  | -0.42314616  |
| VSTM2B     | ENSG00000187135.7  | 1.243123643  | -0.570514559 | 1.163732947  |
| AL442125.1 | ENSG00000276248.1  | -0.132313288 | -0.804358567 | 0.247141492  |
| AC137767.1 | ENSG00000256092.2  | 1.345643074  | 0.000664406  | 0.752370412  |
| AC022211.1 | ENSG00000263786.1  | 1.11828844   | 0.329815606  | -0.467898977 |
| WDFY3-AS2  | ENSG00000180769.8  | 0.174054226  | 0.527239273  | 1.449413222  |
| AC135507.1 | ENSG00000272182.1  | -0.315963461 | 0.457129052  | 1.462627559  |
| AC145423.3 | ENSG00000278112.1  | 1.291737331  | 1.662005774  | 2.747936788  |
| FTH1P15    | ENSG00000218980.2  | 0.887438905  | -0.110783532 | 1.093571246  |
| GTF2IRD2   | ENSG00000196275.13 | 0.029807885  | -0.504337219 | 2.144230684  |
| ACTA2      | ENSG00000107796.13 | 3.284210377  | 4.224268469  | 5.567269678  |
| NBPF20     | ENSG00000162825.16 | 0.496932768  | 0.299369448  | -1.044555762 |
| MYLK       | ENSG00000065534.18 | 2.511775778  | 3.076814073  | -0.859544796 |
| AP001767.4 | ENSG00000279900.1  | 0.207806024  | -0.133696474 | 0.772698785  |
| KCNAB3     | ENSG00000170049.9  | 2.415157443  | 0.670304737  | 0.70279586   |
| CYBRD1     | ENSG00000071967.11 | 4.40783048   | 6.844635763  | 4.391430036  |
| FEZ1       | ENSG00000149557.12 | 5.635620028  | 3.402888025  | 4.858674123  |
| DFFBP1     | ENSG00000232303.2  | 1.310056115  | 0.225620421  | 0.709130763  |
| C1S        | ENSG00000182326.14 | -0.86584048  | -0.290732327 | -0.834856596 |
| STX18-AS1  | ENSG00000247708.7  | 1.577943043  | 0.580693851  | 3.083353346  |
| KLRA1P     | ENSG00000256667.6  | -0.270145385 | 0.259884936  | 1.773638887  |
| CMTM8      | ENSG00000170293.8  | 4.297245444  | 4.507540068  | 4.077703691  |
| RASL10B    | ENSG00000270885.1  | -1.142176543 | 2.587288119  | 3.857091603  |
| SMC5-AS1   | ENSG00000268364.1  | 0.065941079  | 0.649141724  | -0.085461442 |
| AC048341.2 | ENSG00000257354.2  | -0.056556114 | 0.499386538  | 0.125918081  |
| CASC15     | ENSG00000272168.6  | -0.723563541 | 1.557650953  | 2.088794126  |
| ANKRD33B   | ENSG00000164236.11 | 0.770940745  | 3.969885016  | 4.129526666  |
| AL035563.1 | ENSG00000273148.1  | 1.537965042  | 0.941733266  | -0.667645598 |
| TBX19      | ENSG00000143178.12 | 1.631409636  | 1.830861295  | -0.960483659 |
| CYGB       | ENSG00000161544.9  | -0.958326335 | 8.376035514  | 8.842313906  |
| AL627171.2 | ENSG00000282885.1  | -0.453151598 | -0.845183438 | 1.984257522  |
| RAPGEF5    | ENSG00000136237.18 | 1.403031341  | 4.67260939   | 0.418957569  |



|              |                    |              |              |              |
|--------------|--------------------|--------------|--------------|--------------|
| AL137003.2   | ENSG00000272341.1  | -0.110140067 | 0.126714365  | 1.695698611  |
| PWP2         | ENSG00000241945.7  | 3.355111925  | 2.407428675  | 2.133419687  |
| ADHFE1       | ENSG00000147576.15 | -0.821757123 | 0.805953293  | 1.098413672  |
| AC016590.2   | ENSG00000267682.1  | 0.319824782  | 0.21976083   | -0.046139458 |
| PPP1R12A-AS1 | ENSG00000257557.2  | -1.174138745 | -0.797238507 | 0.465206431  |
| CASC2        | ENSG00000177640.15 | 1.198781654  | 0.09722562   | 0.070911992  |
| AL359878.1   | ENSG00000205740.2  | -1.213606727 | 0.203869436  | -0.645187972 |
| AC021016.2   | ENSG00000261338.2  | -0.711132923 | -0.036141894 | -0.692081311 |
| TEN1         | ENSG00000257949.6  | 0.668037287  | 0.137578211  | 1.416814357  |
| GSTT2        | ENSG00000099984.11 | -0.291465652 | 1.814033136  | 0.411484425  |
| AC090948.2   | ENSG00000272498.1  | 0.807391273  | -0.028952884 | -0.709152011 |
| LGALSL       | ENSG00000119862.12 | 2.970317199  | 3.962714177  | 3.89484141   |
| LINC00663    | ENSG00000266904.5  | 0.735646622  | 0.11662931   | 1.800687245  |
| LMO2         | ENSG00000135363.11 | 1.16338398   | -1.28531867  | 2.573541624  |
| ABCA11P      | ENSG00000251595.7  | 1.763582998  | 0.662984785  | 0.384218385  |
| ZCWPW1       | ENSG00000078487.17 | 1.520826188  | 1.323436528  | 1.583836733  |
| HSF2BP       | ENSG00000160207.8  | -0.818118344 | -0.383276855 | 0.543617444  |
| AC006011.1   | ENSG00000244563.1  | 3.438018835  | 6.010219112  | 5.782266513  |
| AP002360.4   | ENSG00000272301.1  | 0.517236756  | 0.68171666   | 1.093433914  |
| AIF1L        | ENSG00000126878.12 | 3.75474295   | 3.305329074  | -1.196870423 |
| PPIAP29      | ENSG00000214975.4  | 0.779564061  | 0.56674598   | -0.524053886 |
| AC009996.1   | ENSG00000259659.1  | 0.187278183  | -1.414788778 | -0.170304215 |
| AL078590.3   | ENSG00000232310.6  | -0.083465752 | 0.293517685  | 0.684611773  |
| FN3K         | ENSG00000167363.13 | -0.65597504  | 5.958993479  | 7.305083242  |
| AL353796.1   | ENSG00000259994.1  | 0.426253463  | 0.180186017  | -0.484605315 |
| AC022306.2   | ENSG00000275580.1  | 0.186531444  | 0.356845997  | 0.740591448  |
| AC073529.1   | ENSG00000234129.7  | 0.9594712    | -0.496385051 | 0.710356374  |
| AC015813.2   | ENSG00000266086.1  | -0.952549374 | 2.101347949  | -0.327699891 |
| COX6A1P2     | ENSG00000226976.3  | 0.57932463   | -0.100104582 | 1.82599477   |
| AL133243.3   | ENSG00000276517.1  | 0.644703179  | 0.010281599  | -0.3240043   |
| USP3-AS1     | ENSG00000259248.5  | 0.775759209  | 0.789417921  | -0.69809292  |
| CCNB3        | ENSG00000147082.17 | 0.008455981  | -1.094408991 | -0.272916053 |
| CAMK1        | ENSG00000134072.10 | 1.379029435  | 4.017419801  | 2.648722544  |
| LDLRAD4      | ENSG00000168675.18 | -0.02757915  | 3.94271961   | 3.431543617  |
| TNFSF4       | ENSG00000117586.10 | -1.041464217 | 1.769078073  | 0.120923722  |
| AC018628.1   | ENSG00000279133.1  | -0.481864578 | 0.900963096  | 1.058607167  |
| HPDL         | ENSG00000186603.5  | 4.627496829  | 3.030235185  | 1.812900015  |
| AC004148.2   | ENSG00000263272.1  | 1.871764459  | -0.630956713 | -0.85889388  |
| AL139089.1   | ENSG00000273723.1  | 1.242022868  | 0.518539028  | -0.203856622 |
| HLA-DPA1     | ENSG00000231389.7  | 7.839268383  | -0.712553825 | 3.122779743  |
| FOXD2        | ENSG00000186564.5  | 1.991979918  | 0.170251374  | -1.452261352 |
| AC239868.1   | ENSG00000220323.3  | -0.996129205 | 0.263022046  | -0.833307903 |
| AC079807.2   | ENSG00000233230.1  | -0.527074976 | 1.27196564   | 0.940997329  |
| CALHM2       | ENSG00000138172.10 | 5.408125762  | -0.691616544 | 5.214017758  |
| ZC3H11B      | ENSG00000215817.5  | -0.832518058 | -1.11355075  | -0.944263803 |
| AC104452.1   | ENSG00000283189.2  | -0.570316819 | 1.347870685  | 1.503211451  |

|            |                    |              |              |              |
|------------|--------------------|--------------|--------------|--------------|
| AC110285.7 | ENSG00000279692.1  | 1.704974883  | 0.870685031  | 2.309658374  |
| LRRC24     | ENSG00000254402.6  | -1.095515289 | 0.969343084  | -0.369688898 |
| BX537318.1 | ENSG00000273145.1  | 0.3391814    | 0.853695805  | 0.846285541  |
| LDHD       | ENSG00000166816.13 | -0.833543323 | -0.940420951 | -1.077552366 |
| AL355802.3 | ENSG00000271754.1  | 2.653796952  | 0.736026162  | -0.622523886 |
| AC007032.1 | ENSG00000273320.1  | -0.725582143 | 1.384897191  | 1.323639563  |
| LY6G5C     | ENSG00000204428.12 | 0.544072217  | 1.202746301  | 1.226316727  |
| AP006621.2 | ENSG00000255142.1  | -0.169936618 | 1.118114051  | -0.247555169 |
| AC027237.3 | ENSG00000259426.5  | 0.682113415  | -0.440143803 | 0.921502913  |
| FTH1P16    | ENSG00000227376.1  | -0.878849715 | 0.431785978  | 1.459101455  |
| ARHGAP24   | ENSG00000138639.17 | 1.732214096  | 3.45065989   | 1.946632378  |
| AL034549.2 | ENSG00000276073.1  | -1.131694559 | -0.654172818 | -0.769084829 |
| CLCF1      | ENSG00000175505.10 | 3.636363913  | -0.363751335 | -0.890409062 |
| AC104763.1 | ENSG00000241157.1  | -0.684458329 | 2.200604914  | 3.621964236  |
| MIR1825    | ENSG00000284125.1  | -1.127063161 | -1.118727901 | -1.243696575 |
| HIST1H2BC  | ENSG00000180596.7  | -0.324957135 | 3.475127593  | -0.415461173 |
| VEPH1      | ENSG00000197415.11 | 0.075441765  | 5.123691268  | 0.027642278  |
| 44078      | ENSG00000108387.14 | -1.046046091 | 5.727622887  | 1.763715401  |
| TUBBP1     | ENSG00000127589.4  | 0.235104735  | -0.365449803 | -1.163987827 |
| CFL1P5     | ENSG00000213830.3  | 0.293025668  | 0.228267467  | 0.387841028  |
| MADCAM1    | ENSG00000099866.14 | -1.079655949 | -0.505025848 | 0.364657178  |
| FBXO2      | ENSG00000116661.10 | 1.538596995  | 4.153954043  | 4.088163978  |
| SPRY3      | ENSG00000168939.11 | -0.968409075 | -0.496672054 | -0.872642449 |
| AL359091.4 | ENSG00000273186.1  | 0.492712792  | 1.91372095   | -0.618689918 |
| RNA5SP383  | ENSG00000199804.1  | -0.007607471 | 0.674282037  | 1.284689347  |
| RPS3AP6    | ENSG00000234797.5  | 1.439428333  | 0.377857614  | 0.663846799  |
| NPM1P9     | ENSG00000231066.3  | 2.156279521  | -0.472206223 | -0.956821484 |
| NGFR       | ENSG00000064300.8  | 4.329384125  | 2.450387495  | 0.279864166  |
| AC102945.2 | ENSG00000279041.1  | -1.016776226 | 1.014237868  | 0.891509236  |
| LINC00472  | ENSG00000233237.6  | 0.424809496  | -0.474681483 | -1.149781621 |
| HIST1H4E   | ENSG00000276966.2  | -0.427815839 | 0.220844977  | -0.925947491 |
| AC105942.1 | ENSG00000235501.5  | -0.595943865 | 0.701539141  | 1.996794724  |
| DNAAF3     | ENSG00000167646.13 | 2.35677578   | 2.153030873  | -0.763406339 |
| ATP2B1-AS1 | ENSG00000271614.1  | -0.60377792  | -1.05808382  | -1.384214564 |
| ZNF185     | ENSG00000147394.18 | -0.063689645 | 1.623914886  | 0.606961161  |
| AP006333.1 | ENSG00000256341.1  | -1.132859    | -0.673473296 | -0.096382698 |
| AL356235.1 | ENSG00000248503.2  | -0.72876557  | -0.206118207 | -0.920385281 |
| RBPM52     | ENSG00000166831.8  | 3.752352762  | 3.220657337  | 4.874413612  |
| FBXO36     | ENSG00000153832.11 | 0.121045116  | -0.171307958 | -0.880967981 |
| ACVR2B-AS1 | ENSG00000229589.1  | 1.001075267  | 2.431545154  | 1.044134037  |
| AC064799.1 | ENSG00000212664.5  | -0.091841942 | 0.42694225   | -0.011921142 |
| SEC31B     | ENSG00000075826.16 | 1.758441141  | 1.314016114  | 2.027797219  |
| AC009318.3 | ENSG00000274315.1  | -0.041610055 | 0.710668016  | -1.420438781 |
| HOXC-AS1   | ENSG00000250451.5  | 1.972889075  | -0.655812424 | 0.25531078   |
| AC006449.5 | ENSG00000277182.1  | -0.340563921 | -0.396571673 | 0.055037526  |
| AC008105.1 | ENSG00000233175.2  | 0.824980899  | 2.084782808  | -0.121368374 |

|            |                    |              |              |              |
|------------|--------------------|--------------|--------------|--------------|
| AC069544.1 | ENSG00000272853.1  | 0.210840309  | 0.089442549  | -0.22084797  |
| STYK1      | ENSG00000060140.8  | -0.676695211 | 1.291111316  | 1.574953199  |
| ZBTB20     | ENSG00000181722.16 | 0.154912646  | 0.361943665  | 2.80715166   |
| FSIP1      | ENSG00000150667.6  | 1.637553684  | -0.704409744 | -0.249379348 |
| ASPHD1     | ENSG00000174939.10 | 4.429914893  | 5.315479796  | -1.116159157 |
| NIPAL1     | ENSG00000163293.11 | 3.128538908  | -0.961468277 | 0.60830634   |
| SNORA2B    | ENSG00000207313.1  | 1.049003325  | -0.090148835 | -0.615932537 |
| FBXL7      | ENSG00000183580.9  | -1.239745901 | 6.201033791  | 2.347231568  |
| AC009065.4 | ENSG00000260778.5  | 0.920967956  | 0.581704435  | 1.161821753  |
| ATP6V1G2   | ENSG00000213760.10 | 1.174740743  | -0.165060933 | 0.03423625   |
| MIR7705    | ENSG00000284570.1  | -1.167390038 | -1.041048603 | -1.262610591 |
| AC010547.5 | ENSG00000261611.5  | -0.000957932 | 1.521917208  | 1.899053383  |
| AC027307.3 | ENSG00000268798.1  | 0.959158817  | -0.72234326  | -0.594220975 |
| AL391684.1 | ENSG00000224934.3  | -0.445502195 | -0.428168726 | 1.255321194  |
| CCDC74B    | ENSG00000152076.18 | 2.959179811  | 0.602327607  | 0.611702476  |
| AF127577.4 | ENSG00000235609.7  | -0.61841282  | -1.414439858 | -0.348746617 |
| EP300-AS1  | ENSG00000231993.1  | -0.545135954 | -1.355801098 | 0.719100264  |
| UCP2       | ENSG00000175567.8  | 2.503045483  | 2.225612428  | 2.484102104  |
| TRPV1      | ENSG00000196689.11 | 1.200022134  | 0.41379031   | -0.343192395 |
| GTSE1-AS1  | ENSG00000277232.2  | -0.274639944 | 0.71690156   | 0.263646179  |
| U47924.2   | ENSG00000272173.1  | 1.821059381  | -0.706929109 | -1.079446731 |
| PCDHGA10   | ENSG00000253846.2  | 1.673897237  | -0.681385892 | 0.174328172  |
| AC009065.5 | ENSG00000261123.1  | -0.416016472 | 0.043561675  | 0.680554067  |
| COL4A2     | ENSG00000134871.17 | 8.688427994  | 7.517641856  | -1.059049793 |
| LINC00518  | ENSG00000183674.11 | -0.775802769 | 5.494134329  | 5.543616805  |
| AL031009.1 | ENSG00000278987.1  | -0.997406579 | -1.140983139 | -0.419617137 |
| MIR3936HG  | ENSG00000233006.6  | 0.935734992  | 0.849463841  | 2.51090916   |
| MAMSTR     | ENSG00000176909.11 | 0.572248928  | 1.500447372  | 1.043550526  |
| LINC01021  | ENSG00000250337.5  | 2.639423092  | 5.586050872  | 5.02523948   |
| AC245140.2 | ENSG00000280195.1  | 1.587694227  | 0.511263762  | -0.992259243 |
| SEC24B-AS1 | ENSG00000247950.6  | 0.385394718  | -0.610986868 | 0.113559786  |
| AC068446.1 | ENSG00000237161.4  | -1.078262211 | -0.275298212 | 0.809317279  |
| AC018638.7 | ENSG00000271553.1  | -1.315676565 | -0.003896309 | 0.075267788  |
| AL356273.3 | ENSG00000279838.1  | -0.603512218 | 1.803789442  | -0.738315975 |
| AC243919.1 | ENSG00000278202.1  | 0.60707625   | -0.979208495 | 0.845119302  |
| AL645728.1 | ENSG00000215014.4  | -0.717013881 | 0.336278379  | -0.925183334 |
| ACAP2-IT1  | ENSG00000229325.1  | -1.377966653 | -0.127782095 | -0.450610803 |
| NRCAM      | ENSG00000091129.19 | 4.26132359   | 3.826902035  | -1.572671806 |
| RPL23AP2   | ENSG00000225067.4  | 1.863156122  | -0.367078445 | 0.435536517  |
| AC012085.1 | ENSG00000186076.5  | 0.553991144  | -0.524356125 | -0.822316812 |
| DTX4       | ENSG00000110042.7  | -1.131998836 | 1.212746622  | 2.290682182  |
| AL353708.3 | ENSG00000272906.1  | -0.008859454 | 0.659784508  | 0.173360124  |
| AL359513.1 | ENSG00000278238.1  | 0.665165823  | -0.220866197 | 0.36869478   |
| PAXBP1-AS1 | ENSG00000238197.5  | 0.705667454  | 0.189700967  | -0.392789402 |
| ALK        | ENSG00000171094.17 | 0.155027776  | -0.643962028 | -0.99734048  |
| AC097461.1 | ENSG00000261428.2  | -0.017514989 | 0.382150868  | -0.973763235 |

|            |                    |              |              |              |
|------------|--------------------|--------------|--------------|--------------|
| BTG3-AS1   | ENSG00000280594.1  | -0.489226836 | 1.379958133  | 0.434688765  |
| GCHFR      | ENSG00000137880.5  | 3.913590216  | 1.702071002  | 3.743251499  |
| GIPR       | ENSG00000010310.8  | -0.324650067 | 1.945182976  | 1.340976511  |
| RPSAP15    | ENSG00000237506.3  | 1.236425294  | 0.34757386   | -0.327805867 |
| ZFP37      | ENSG00000136866.13 | 2.11612467   | 2.47440388   | -1.073565579 |
| H2AFY2     | ENSG00000099284.13 | 3.839042142  | 0.748014111  | 1.771670822  |
| AC124798.1 | ENSG00000260196.1  | 1.885306764  | 1.905673919  | -1.066929179 |
| MIRLET7D   | ENSG00000199133.3  | 1.971197238  | 1.557833435  | 0.80470552   |
| SRGAP2B    | ENSG00000196369.11 | 2.124123802  | 1.431503317  | -0.994447136 |
| AC079684.1 | ENSG00000274943.1  | 0.544803651  | 2.349420316  | -1.062343019 |
| C4orf32    | ENSG00000174749.5  | 3.227934302  | -0.244361766 | 0.849879159  |
| AC026124.2 | ENSG00000276853.1  | -0.334938934 | -0.303670058 | -0.760435861 |
| B3GALT4    | ENSG00000235863.3  | -1.020852591 | 0.296927505  | -0.874494789 |
| LCP1       | ENSG00000136167.13 | -1.471240377 | 2.573878486  | 6.955911361  |
| NR2F1      | ENSG00000175745.11 | 1.896860498  | -1.079451475 | 1.210842524  |
| RPSAP12    | ENSG00000240087.3  | 1.492864843  | 0.151951392  | -1.220519973 |
| AC055713.1 | ENSG00000247373.3  | -0.869063849 | -0.312050172 | 0.6409566    |
| AC016831.1 | ENSG00000226380.9  | -1.341926077 | 3.007530474  | 3.256414834  |
| AC093249.6 | ENSG00000261840.2  | 0.744111519  | -0.780944078 | -0.116757446 |
| SERF1B     | ENSG00000205572.9  | 0.669027416  | -0.481740479 | -0.400035979 |
| AL358472.2 | ENSG00000272654.1  | 1.559125756  | 0.806023909  | -1.123516368 |
| MALAT1     | ENSG00000278217.1  | -1.315807431 | -1.276436079 | -1.363202199 |
| EPHA3      | ENSG00000044524.10 | 6.149742566  | 3.8043221    | -1.666246999 |
| BZW1P2     | ENSG00000198406.7  | -0.247633077 | -0.814828506 | -1.117868048 |
| RPL23AP1   | ENSG00000239257.1  | 0.465159471  | 3.037791047  | 0.900823449  |
| BIRC3      | ENSG00000023445.13 | 0.491524954  | -1.356008767 | 3.186556168  |
| MIR4657    | ENSG00000284261.1  | -1.208340789 | -1.282255734 | -1.262079301 |
| POM121B    | ENSG00000205578.5  | -0.665806457 | -0.933614613 | 0.315418122  |
| AC067931.1 | ENSG00000279766.1  | -0.399899367 | -0.598201858 | 0.026618195  |
| AC091940.1 | ENSG00000250072.5  | 3.252189358  | 1.575170516  | 0.598526246  |
| AL731569.1 | ENSG00000227896.2  | 0.335326048  | -0.842483991 | -0.2659153   |
| AC018413.1 | ENSG00000265778.2  | -0.056761347 | 1.018144088  | 1.801685633  |
| IRAK1BP1   | ENSG00000146243.13 | 0.34818902   | 0.936771384  | 0.089563054  |
| FP565260.1 | ENSG00000275464.4  | 0.282105183  | 0.09750179   | -0.914181441 |
| AL590705.5 | ENSG00000254876.5  | -0.468955652 | 2.36078384   | 1.60085299   |
| AL031432.4 | ENSG00000284602.1  | 0.106855786  | 0.534323072  | -0.394417546 |
| EID3       | ENSG00000255150.2  | -0.516467427 | 0.218570168  | -1.248662203 |
| PCDHB6     | ENSG00000113211.5  | 4.033137669  | -1.070108145 | -1.323861004 |
| UBR5-AS1   | ENSG00000246263.2  | -0.890053807 | 0.000258372  | 1.736059176  |
| AP000766.1 | ENSG00000261098.1  | -0.412337819 | -1.477718427 | -0.162485183 |
| AC019131.2 | ENSG00000272777.1  | -0.634416114 | -0.722660556 | 0.026206959  |
| KIAA1161   | ENSG00000164976.8  | -1.403568453 | 0.802549143  | 0.348548829  |
| FAM46C     | ENSG00000183508.4  | 0.927338048  | -0.619630899 | 1.831607292  |
| AC026356.2 | ENSG00000276115.1  | 0.395569919  | -0.208928434 | -0.719441191 |
| AC134878.2 | ENSG00000278212.1  | 1.167450895  | -0.856987182 | -1.484001596 |
| NINL       | ENSG00000101004.14 | 0.11285614   | 2.933816483  | 2.731829433  |

|            |                    |              |              |              |
|------------|--------------------|--------------|--------------|--------------|
| AMT        | ENSG00000145020.15 | -0.300875285 | 0.455529946  | 1.23876831   |
| AL354696.1 | ENSG00000277662.1  | 0.087890045  | 1.243301851  | -0.169690551 |
| FAM27E3    | ENSG00000274026.1  | 2.030260478  | 1.457921254  | 1.205823469  |
| SHROOM3    | ENSG00000138771.14 | 3.309999947  | 2.388618662  | 3.75180531   |
| AL133367.1 | ENSG00000260285.1  | -0.120497019 | 0.269316431  | -1.561903892 |
| LUZP6      | ENSG00000267697.1  | -1.317489028 | -1.26349558  | -1.423390361 |
| MIR600HG   | ENSG00000236901.6  | 0.730013968  | 2.110997821  | 0.973758207  |
| B3GALT1    | ENSG00000172318.5  | 0.716583666  | -1.226720135 | 2.787419508  |
| AC004801.6 | ENSG00000276814.1  | 0.02860974   | -1.291553718 | -1.347062821 |
| TMEM91     | ENSG00000142046.14 | -0.052638672 | 0.120011675  | 2.332311529  |
| AC069234.5 | ENSG00000277423.1  | 0.43570609   | -0.745966876 | -0.598306285 |
| SETP14     | ENSG00000240489.1  | 0.167456614  | -0.225388934 | -1.162985029 |
| MIR6501    | ENSG00000284448.1  | -1.271233769 | -1.402636478 | -1.451757972 |
| AL078621.3 | ENSG00000279267.1  | -1.243440641 | -1.040969258 | -0.599982795 |
| AC124016.1 | ENSG00000272677.1  | 0.514521686  | -0.877544575 | -0.312577323 |
| AC004801.2 | ENSG00000240399.1  | 1.669968117  | 1.790467708  | 1.973358389  |
| AC074032.1 | ENSG00000272368.2  | 0.470325405  | 1.257066045  | -0.567124178 |
| CHSY3      | ENSG00000198108.3  | -1.190495489 | 2.841434435  | 1.906830719  |
| LRRFIP1P1  | ENSG00000240429.1  | -0.815893105 | 1.36730293   | 0.593248105  |
| EXTL3-AS1  | ENSG00000246339.5  | -1.402564053 | -0.481387946 | -0.573966363 |
| C2CD2      | ENSG00000157617.16 | -0.836394481 | 2.360745783  | 3.070260194  |
| WBP1LP2    | ENSG00000250474.2  | -0.224449472 | -0.848507799 | 0.399160282  |
| AC012184.3 | ENSG00000261777.5  | 0.887315066  | 0.471994053  | 1.373158696  |
| HRK        | ENSG00000135116.9  | 0.528267601  | 2.956937997  | 3.108033559  |
| MICE       | ENSG00000273340.1  | -1.203673967 | 3.352144531  | 1.263035199  |
| LINC00471  | ENSG00000181798.2  | -0.129734357 | -0.011912667 | 0.407509197  |
| CCT6B      | ENSG00000132141.13 | -0.862519322 | 1.029665577  | 1.790806717  |
| AL136162.1 | ENSG00000271888.1  | 1.114418288  | 0.238658364  | 0.458355796  |
| AL356019.2 | ENSG00000258768.2  | 0.056827963  | -0.501324007 | 0.18859545   |
| AC009126.1 | ENSG00000247121.6  | -0.267100533 | -0.811365082 | 0.56543877   |
| AC027682.6 | ENSG00000276075.1  | -0.761187045 | -0.30603008  | -0.091209001 |
| AP000787.1 | ENSG00000245552.6  | 0.565714137  | 1.119271455  | 2.544499307  |
| AL391069.2 | ENSG00000232671.5  | 1.414188855  | 1.20582095   | -1.278845873 |
| AP001486.2 | ENSG00000260966.1  | 0.973905485  | -0.320707345 | -1.368802144 |
| FZD9       | ENSG00000188763.4  | 2.219197606  | 2.921470972  | -1.073703911 |
| RPL39P36   | ENSG00000239912.1  | 0.463331145  | 0.161511198  | -0.243425313 |
| DGKI       | ENSG00000157680.15 | -1.118906957 | 2.308423066  | 2.952999439  |
| SLC4A4     | ENSG00000080493.15 | -0.904575945 | 1.632216125  | 0.031342876  |
| AC025165.5 | ENSG00000270039.1  | 0.302449014  | 0.617631956  | 2.982370308  |
| ROPN1L     | ENSG00000145491.11 | 1.09919453   | 1.337225723  | -1.441802572 |
| ZDHHC11    | ENSG00000188818.12 | 3.685087361  | 4.758315676  | 0.965351457  |
| F8         | ENSG00000185010.13 | 0.654000184  | -0.594528803 | 2.673674038  |
| RAB36      | ENSG00000100228.12 | 3.475388262  | 3.333491866  | 2.256869172  |
| AC007038.1 | ENSG00000229127.1  | -0.938885536 | 0.750354198  | 0.867821151  |
| COL15A1    | ENSG00000204291.10 | 1.17266924   | 0.183108852  | 0.200484286  |
| FAM227A    | ENSG00000184949.15 | 0.20781897   | 0.429501033  | -0.849070247 |

|            |                    |              |              |              |
|------------|--------------------|--------------|--------------|--------------|
| CTRL       | ENSG00000141086.17 | 0.458648575  | -0.529604655 | -0.518526132 |
| MIR4647    | ENSG00000284427.1  | -1.354019032 | -1.37012132  | -1.487259891 |
| LINC01366  | ENSG00000235172.7  | 2.237255134  | 1.779704953  | 0.258446777  |
| AC019226.1 | ENSG00000281469.1  | -1.602891051 | 0.423398022  | 0.077994415  |
| AC020661.1 | ENSG00000251161.3  | 0.538887686  | 0.166608291  | -1.212806851 |
| SNORA41    | ENSG00000207406.1  | 0.533588773  | 1.857409468  | 1.439042781  |
| PIGY       | ENSG00000255072.1  | -1.233921867 | -1.336713313 | -1.472502587 |
| PAN3-AS1   | ENSG00000261485.1  | 1.106730248  | 1.061835952  | 2.158662279  |
| SCN8A      | ENSG00000196876.15 | -0.339355948 | -0.343992079 | 1.804266341  |
| AC068205.2 | ENSG00000283341.1  | 0.486140541  | 1.234396506  | 1.540006814  |
| ISPD       | ENSG00000214960.9  | 0.347573452  | 1.505427768  | -0.945828817 |
| AC012676.1 | ENSG00000262712.1  | 1.432393594  | -0.360396262 | -0.729265728 |
| AC005070.3 | ENSG00000272918.1  | -0.237301059 | -0.294950506 | -0.471129126 |
| ZBED3-AS1  | ENSG00000250802.6  | 1.527043179  | -1.206750901 | 3.117469463  |
| OGFRP1     | ENSG00000182057.4  | 0.771023197  | 0.919859518  | 0.425653281  |
| AC005702.1 | ENSG00000267302.5  | -0.87792121  | -0.450865066 | 2.637433375  |
| PLAUR      | ENSG00000011422.11 | 5.59730933   | 5.625512642  | 5.040585812  |
| CCDC113    | ENSG00000103021.9  | 2.599323943  | 2.319013011  | 0.715329945  |
| DMD        | ENSG00000198947.15 | -1.282928606 | 2.515631672  | 1.269811856  |
| AC007036.3 | ENSG00000251660.1  | -1.467316371 | 2.248278348  | -1.070380183 |
| NAALADL2   | ENSG00000177694.15 | 0.025657953  | 0.224141081  | -1.258993633 |
| ITPKA      | ENSG00000137825.10 | 0.970837975  | -0.862155061 | 4.346613532  |
| RAPGEF4    | ENSG00000091428.17 | 1.535014927  | -1.561851686 | 5.333712056  |
| HSPE1P3    | ENSG00000259746.1  | -0.635731492 | -0.494352348 | -0.27848852  |
| C3orf18    | ENSG00000088543.14 | 2.51848044   | 4.008680869  | 2.241535087  |
| RGPD5      | ENSG00000015568.12 | -0.755051794 | -0.360317402 | 0.086539585  |
| RPS15AP17  | ENSG00000225405.3  | -0.377404669 | -0.285293813 | -0.488909065 |
| PTP4A3     | ENSG00000184489.11 | -0.070290967 | 2.639851655  | 0.633510715  |
| PMS2P2     | ENSG00000278416.1  | -0.379609083 | -1.682973803 | -0.320160272 |
| AC092119.2 | ENSG00000274460.1  | -0.481531819 | -0.283520822 | 0.319493018  |
| EEF1A1P11  | ENSG00000228502.1  | 0.541926535  | -1.13920482  | -0.471749149 |
| SLC44A3    | ENSG00000143036.16 | -1.520431002 | 3.330688153  | 3.56899282   |
| AC007773.1 | ENSG00000267213.4  | 1.469474984  | 1.154456279  | -0.077846242 |
| ALDOC      | ENSG00000109107.13 | 5.137607368  | 1.667315962  | -1.464320916 |
| AP000254.1 | ENSG00000273271.1  | 0.468787981  | -1.395602385 | 0.622763412  |
| AC105219.1 | ENSG00000181097.5  | 1.852801049  | -0.883773141 | -0.223740743 |
| TLR1       | ENSG00000174125.7  | -0.027263415 | -0.572335993 | 2.00679077   |
| AC016949.1 | ENSG00000230732.4  | 0.584748405  | -0.524420678 | 0.396257598  |
| LEAP2      | ENSG00000164406.7  | 1.00200711   | -0.26229533  | -1.48123539  |
| AC020910.4 | ENSG00000274104.1  | 0.814174054  | -0.173596777 | -0.690375472 |
| ENO1P4     | ENSG00000241790.2  | 1.58913506   | 0.802391325  | 1.170198121  |
| BORCS8-MEF | ENSG00000064489.22 | 2.12920165   | 1.976260285  | -1.168616883 |
| AC104563.1 | ENSG00000240036.4  | 0.38886022   | -0.533102028 | -0.36591804  |
| uc_338     | ENSG00000277948.1  | -1.259628464 | 0.174876032  | -0.685281338 |
| AC090519.1 | ENSG00000250130.1  | -1.173556736 | -0.22491934  | 0.582716439  |
| HILS1      | ENSG00000188662.6  | 4.436763699  | 4.564145896  | 3.809520264  |

|            |                    |              |              |              |
|------------|--------------------|--------------|--------------|--------------|
| SCARNA13   | ENSG00000252481.1  | 1.935979032  | -0.716170571 | -0.664526351 |
| COL19A1    | ENSG00000082293.12 | 5.286203407  | 1.135146107  | -1.010819245 |
| AC022167.2 | ENSG00000260276.2  | -0.059948761 | 2.11237151   | 0.705134262  |
| CCDC163    | ENSG00000280670.2  | 3.312167799  | -1.32828158  | 2.302572467  |
| RASAL2-AS1 | ENSG00000224687.1  | 1.160425563  | 1.126665409  | -1.676587024 |
| MIR193BHG  | ENSG00000262454.3  | 0.12006422   | 0.62533825   | 0.057856506  |
| LINC01505  | ENSG00000234323.6  | 0.443817298  | 3.487557628  | -0.943723509 |
| AC007541.1 | ENSG00000260329.1  | 0.902913763  | 0.641822917  | 0.09154337   |
| RPL17P50   | ENSG00000213700.3  | -0.422551772 | 0.471251372  | -0.885960797 |
| RNF128     | ENSG00000133135.13 | 3.788789917  | 2.361618658  | 5.324926747  |
| AC008507.1 | ENSG00000266910.1  | -1.384035602 | 1.002809871  | -0.146467415 |
| QPRT       | ENSG00000103485.17 | 0.622172151  | 7.231268901  | 6.947615631  |
| ARL10      | ENSG00000175414.6  | 0.488791686  | 0.312436776  | 2.653763364  |
| AC009118.2 | ENSG00000276131.1  | 1.151696226  | 0.040556628  | -0.994389994 |
| LINC01001  | ENSG00000230724.9  | 0.470534508  | 1.539837507  | 0.218313006  |
| AC104581.5 | ENSG00000280046.1  | -0.522900145 | -1.39196599  | -1.325413576 |
| AC145285.7 | ENSG00000275807.1  | 0.435944075  | -0.289236838 | 0.185216229  |
| AC021087.3 | ENSG00000260774.1  | -1.304291283 | -0.404009993 | -0.929526874 |
| LINC00638  | ENSG00000258701.1  | -0.399534089 | 0.121138424  | -1.458551131 |
| AC097641.3 | ENSG00000277728.1  | 0.129049915  | -0.02856072  | -0.309162623 |
| AL162431.2 | ENSG00000243155.1  | 0.87939322   | 0.069930564  | -0.512390281 |
| RPL7P32    | ENSG00000231006.1  | -0.392670056 | -0.384904272 | -1.504356022 |
| AC009779.3 | ENSG00000258311.5  | 1.922786875  | 1.493928073  | -1.455248089 |
| PLEKHG1    | ENSG00000120278.15 | 1.683716692  | 3.764423117  | 4.815051268  |
| SNORA31    | ENSG00000199477.1  | -0.313357131 | 0.41535532   | 0.412803182  |
| AC091959.3 | ENSG00000275740.1  | 0.903146872  | -0.535355914 | -0.594717685 |
| TDRP       | ENSG00000180190.11 | -1.700206008 | 0.904664513  | 3.524089032  |
| AC092117.1 | ENSG00000276791.1  | 0.1291274    | 0.912687602  | -1.251453259 |
| AC015712.2 | ENSG00000259583.2  | 0.401647459  | 0.510900433  | -0.605084093 |
| RNA5-8SN4  | ENSG00000275215.1  | 0.763322178  | 0.253213604  | -0.378490591 |
| SUGT1P3    | ENSG00000239827.8  | 0.744439722  | 0.508854243  | 0.122679138  |
| AL662797.2 | ENSG00000272273.1  | -0.140789736 | -1.373405788 | 1.682385527  |
| TMEM240    | ENSG00000205090.8  | -0.21368292  | 0.846890968  | 2.282581478  |
| AP006545.1 | ENSG00000260949.1  | 1.384904124  | -0.342999754 | 0.819275165  |
| BEX2       | ENSG00000133134.11 | 2.468791758  | 4.749027519  | 6.925704299  |
| RN7SL431P  | ENSG00000264384.2  | -0.264708591 | 0.173550691  | -1.44662317  |
| CYCSP24    | ENSG00000227666.1  | 0.483412568  | 2.009935684  | -0.544267906 |
| RN7SL657P  | ENSG00000264293.2  | -0.426647183 | 2.481785833  | 2.637581656  |
| AMDHD1     | ENSG00000139344.7  | -0.661785698 | 1.458617897  | 0.157762885  |
| PTGER4     | ENSG00000171522.5  | -1.18857226  | -0.536125758 | 0.150507915  |
| AC040162.3 | ENSG00000263126.1  | -0.577616888 | -1.050162562 | 0.196229544  |
| AC098614.1 | ENSG00000213846.5  | 4.57206845   | 3.024307782  | 2.175728639  |
| NTN1       | ENSG00000065320.8  | -1.003101614 | 0.22601112   | -0.37270453  |
| HSPD1P1    | ENSG00000213430.6  | -0.886994176 | -0.542879272 | -1.319205156 |
| KLF7       | ENSG00000118263.14 | 2.48117459   | 3.498334502  | 3.111013236  |
| PSCA       | ENSG00000167653.4  | 0.770580449  | 0.940416152  | -0.850813149 |

|            |                    |              |              |              |
|------------|--------------------|--------------|--------------|--------------|
| AC007216.3 | ENSG00000261560.1  | 0.176947407  | -1.182315502 | -0.367670516 |
| LINC01786  | ENSG00000230415.1  | -0.519682534 | 1.638397094  | 0.035135388  |
| SEMA6B     | ENSG00000167680.15 | 5.05569373   | 4.923974777  | 7.304910819  |
| TPD52L1    | ENSG00000111907.20 | 6.431039058  | 3.81671265   | 6.024454143  |
| CYP39A1    | ENSG00000146233.7  | -1.312332937 | 0.461306306  | 0.657823926  |
| AP000873.1 | ENSG00000241020.1  | -1.32404758  | -1.219867727 | -1.264550762 |
| AC132938.6 | ENSG00000279744.1  | -0.359719817 | -0.312655406 | 0.349189543  |
| BATF2      | ENSG00000168062.9  | 1.436693313  | -1.242207717 | 1.165218487  |
| AC008764.6 | ENSG00000269399.2  | 1.066360387  | 1.069255913  | -0.671836114 |
| Z92544.2   | ENSG00000261659.2  | 0.532918704  | 0.521644361  | 0.717343103  |
| LYRM9      | ENSG00000232859.9  | -0.040066962 | 2.378113558  | 2.468756222  |
| SNORD52    | ENSG00000201754.1  | -1.334926474 | -1.413062438 | -1.531291791 |
| MIR877     | ENSG00000216101.3  | -0.613181804 | 0.298561366  | -0.120348949 |
| AC092718.7 | ENSG00000278985.1  | -1.806928637 | -0.848716219 | -0.393575293 |
| MIR3176    | ENSG00000266235.1  | 3.526508378  | 1.682420427  | 2.498740816  |
| YPEL1      | ENSG00000100027.14 | -0.728851681 | -1.194878272 | 1.482251325  |
| MIR198     | ENSG00000284121.1  | -1.687474593 | -1.354862332 | -1.611832435 |
| TLE2       | ENSG00000065717.14 | 1.770589692  | 1.648776957  | 1.929865813  |
| AC137723.1 | ENSG00000264569.1  | -0.633184402 | -0.640156376 | -0.086703733 |
| SNHG22     | ENSG00000267322.2  | -0.956468996 | 1.862470624  | 1.60613556   |
| AC109587.1 | ENSG00000244513.6  | 1.214867153  | -0.682804225 | 0.417106762  |
| ZNF233     | ENSG00000159915.12 | -1.63188668  | -0.309683905 | 1.401520998  |
| AC092902.5 | ENSG00000284624.1  | 0.793011823  | 1.913619534  | 2.229547537  |
| CLSTN3     | ENSG00000139182.13 | 2.593651411  | 3.716646132  | 3.352773602  |
| RGS9       | ENSG00000108370.16 | 1.501649505  | -1.221994743 | 3.778689457  |
| LINC00310  | ENSG00000227456.7  | 0.530890353  | -1.103269617 | -0.427216376 |
| DICER1-AS1 | ENSG00000235706.7  | -0.547636879 | -0.343489635 | 0.467007949  |
| AC096586.1 | ENSG00000272936.1  | 0.763810657  | -0.497481898 | 1.077690985  |
| ARL17A     | ENSG00000185829.17 | 0.106702889  | -0.669031517 | 1.886195693  |
| AL390195.1 | ENSG00000243960.1  | 0.877357582  | 0.763812081  | 0.13274148   |
| ARL17B     | ENSG00000228696.8  | -0.583312238 | -0.726825674 | 2.175895925  |
| ZC3H10     | ENSG00000135482.6  | 2.608467526  | 1.843106741  | -0.675252567 |
| ZFH2-AS1   | ENSG00000157306.14 | 0.245961883  | 0.916461263  | -0.701273234 |
| AC008494.3 | ENSG00000271797.1  | -0.04062615  | -0.922544267 | -0.447818719 |
| RPL37P6    | ENSG00000241431.1  | 0.771992778  | 0.865947231  | -0.365302693 |
| IPO9-AS1   | ENSG00000231871.5  | 0.209578792  | -1.138783799 | -1.672995427 |
| AC116667.1 | ENSG00000271009.3  | -1.294291713 | -0.875791563 | -0.185237194 |
| MIR4700    | ENSG00000284143.1  | -1.659263771 | -1.514959699 | -1.677924149 |
| IQCH       | ENSG00000103599.19 | 1.074782988  | 1.566047516  | 1.031868491  |
| AC080112.2 | ENSG00000266208.1  | 2.312372921  | 4.170975139  | 2.533386709  |
| AC007318.1 | ENSG00000172974.11 | 0.418629749  | -1.442761157 | -1.12247823  |
| SNORD58C   | ENSG00000202093.1  | 0.422942286  | 0.654261121  | 1.614694842  |
| Z98882.1   | ENSG00000277142.1  | 1.022671709  | 1.218522065  | 0.097761839  |
| AC020663.3 | ENSG00000275056.1  | -0.962664016 | -1.293949319 | -1.035259452 |
| CNTNAP1    | ENSG00000108797.11 | 4.664127358  | 3.877319256  | 2.75078203   |
| BMP4       | ENSG00000125378.15 | 2.774032738  | -1.417435141 | 2.230103884  |



|            |                    |              |              |              |
|------------|--------------------|--------------|--------------|--------------|
| AL604028.2 | ENSG00000234329.1  | -1.01414309  | -0.214481697 | -0.159372103 |
| MIR1182    | ENSG00000283799.1  | -1.385741547 | -1.424228358 | -1.50990712  |
| CRYGS      | ENSG00000213139.7  | -1.499008112 | 1.154029976  | 1.745608703  |
| FAM160A1   | ENSG00000164142.15 | 1.75584147   | 0.732219303  | 1.743967767  |
| KLHDC1     | ENSG00000197776.7  | -1.808934762 | -0.946130768 | -1.186998284 |
| NEK11      | ENSG00000114670.13 | -1.376792768 | 1.479782002  | 0.10384413   |
| CDNF       | ENSG00000185267.9  | 0.676018834  | 1.472875608  | -1.051811871 |
| AL671277.2 | ENSG00000237669.1  | -0.466839024 | -0.888148324 | -0.626528292 |
| AC073342.1 | ENSG00000231840.1  | 0.072551514  | -0.214592586 | 0.759089275  |
| SNORD100   | ENSG00000221500.1  | 4.138451742  | 2.124368519  | 0.454475129  |
| PCDHGB1    | ENSG00000254221.2  | 2.765703586  | 1.734632499  | -1.017881333 |
| AC087190.4 | ENSG00000263244.2  | 2.740804903  | 2.718768752  | 5.016403713  |
| AC110285.6 | ENSG00000275966.1  | -0.334552915 | 0.513677501  | 1.278941191  |
| SPTLC3     | ENSG00000172296.12 | -0.593907287 | 2.762323376  | -1.432731639 |
| AL035252.3 | ENSG00000277938.1  | 0.617229832  | 1.539772323  | -1.381646617 |
| MIR1914    | ENSG00000284433.1  | -1.781681513 | -1.355629078 | -1.47212538  |
| CYSRT1     | ENSG00000197191.4  | 0.929567531  | 1.599762105  | -0.369757676 |
| DNAJC19P5  | ENSG00000225808.1  | 1.031533225  | 0.427255691  | 2.068194506  |
| PCDHGB7    | ENSG00000254122.2  | -1.420649271 | -0.35854389  | 0.418534664  |
| AL354872.2 | ENSG00000271992.1  | 0.638331503  | 0.413652355  | 0.552130067  |
| CDKL3      | ENSG00000006837.11 | 0.402530223  | -1.482429808 | 2.578543224  |
| MIR922     | ENSG00000284146.1  | -1.577711189 | -1.414937579 | -1.623625091 |
| AC009902.3 | ENSG00000272425.1  | -1.273035831 | -0.010296943 | 0.309266431  |
| PCDHB16    | ENSG00000272674.3  | 3.951152008  | -1.355772037 | 3.656164809  |
| AL359752.1 | ENSG00000261662.1  | 0.921356636  | -1.691692137 | 1.067265963  |
| AL390066.1 | ENSG00000224950.2  | 1.057593645  | 0.260536421  | -1.458612221 |
| AL008721.2 | ENSG00000272977.1  | -0.892105441 | -0.399606812 | -0.654845652 |
| AL512408.1 | ENSG00000260063.1  | 1.047628317  | 0.091301481  | -1.642288746 |
| CETN4P     | ENSG00000224786.2  | 0.040619313  | 0.253442549  | -0.112007666 |
| TMEM42     | ENSG00000169964.7  | 3.999768932  | 3.35229715   | 2.267204372  |
| PHF11      | ENSG00000136147.17 | 3.718860274  | 2.503690616  | 2.60817529   |
| ROCK1P1    | ENSG00000263006.6  | -1.388819773 | -0.444689609 | 0.529435961  |
| TMSB15B    | ENSG00000158427.14 | 0.237361213  | 0.126823894  | 0.616724675  |
| RTL5       | ENSG00000242732.4  | 0.361885559  | 1.033017874  | -1.691748243 |
| AP001350.2 | ENSG00000280010.1  | 2.021291697  | -0.927055272 | 1.093187645  |
| RPL7P23    | ENSG00000244363.3  | 0.30442036   | -1.078482556 | -0.517660158 |
| MATN1-AS1  | ENSG00000186056.9  | 1.692241968  | 1.584129607  | -0.959160071 |
| NARF-IT1   | ENSG00000266236.1  | -0.513584349 | -0.218803094 | 0.447231711  |
| AC019080.5 | ENSG00000280374.1  | -1.567694791 | -0.299471893 | -0.376636717 |
| NAPA-AS1   | ENSG00000268061.5  | 0.583473065  | -1.251588397 | -0.193001064 |
| BEND7      | ENSG00000165626.16 | 1.536686438  | 3.009061344  | 2.125003021  |
| AC027575.2 | ENSG00000264278.1  | -1.28432022  | -0.536581899 | -0.027671825 |
| AL031665.2 | ENSG00000276026.1  | -0.679972627 | 0.104385522  | -0.523520684 |
| Y_RNA      | ENSG00000206990.1  | -1.691874183 | -1.563987676 | -1.812964714 |
| IQCD       | ENSG00000166578.9  | 0.679019332  | 1.329126144  | -1.048866286 |
| RTN4RL1    | ENSG00000185924.6  | -1.030763283 | -0.188722816 | 4.970459341  |

|             |                    |              |              |              |
|-------------|--------------------|--------------|--------------|--------------|
| TTC28-AS1_2 | ENSG00000276150.1  | 0.639529784  | 0.301654483  | 1.327311634  |
| SMG1P5      | ENSG00000183604.14 | 0.66158476   | -0.529014488 | 0.437284846  |
| AL109614.1  | ENSG00000276603.1  | -1.430369252 | 0.390323754  | 0.820639454  |
| AL121753.1  | ENSG00000261582.1  | 0.462885224  | -0.292247822 | 0.55495832   |
| TBX18       | ENSG00000112837.16 | 3.329622233  | 3.258644097  | -1.165975313 |
| MIR3615     | ENSG00000284186.1  | -1.06210049  | 2.779185927  | 2.063134637  |
| RN7SL608P   | ENSG00000239884.3  | 0.507498474  | 1.163690302  | 1.244695884  |
| AC233728.1  | ENSG00000233250.1  | 0.711591897  | 0.684075121  | 0.602123767  |
| PNMA2       | ENSG00000240694.8  | -1.703438551 | 2.960666718  | 2.159406736  |
| AC091825.1  | ENSG00000280047.1  | -1.267390148 | -1.3455151   | -1.11759861  |
| AC023355.1  | ENSG00000259488.2  | 0.174931173  | -0.393391099 | -1.484625827 |
| AC008764.8  | ENSG00000279529.1  | -0.604498445 | 1.002564467  | -0.213225353 |
| PLAG1       | ENSG00000181690.7  | 3.278334231  | 2.593588907  | -1.764902756 |
| AC092614.1  | ENSG00000227542.1  | -1.235267201 | -1.435602592 | -0.036447303 |
| AC012313.2  | ENSG00000268049.1  | 1.219023389  | 0.300048551  | -0.285531948 |
| AC110769.2  | ENSG00000270019.1  | -1.754191715 | -0.70663691  | -0.959748471 |
| ARNTL2      | ENSG00000029153.14 | 2.266395007  | 2.040868883  | 2.67301713   |
| AC008438.1  | ENSG00000249637.1  | 0.710626889  | 0.231459119  | -0.6888023   |
| GAS6        | ENSG00000183087.14 | 3.143478231  | 2.475587403  | 4.043951687  |
| MIR6824     | ENSG00000284364.1  | -1.749824958 | -1.57784445  | -1.800862625 |
| FHDC1       | ENSG00000137460.8  | 1.267396128  | 1.11769443   | 0.227427358  |
| STXBP2      | ENSG00000076944.15 | -1.446695178 | 5.584778169  | 2.097239263  |
| RNY3P15     | ENSG00000252106.2  | -1.487422882 | -1.441457116 | -1.539876257 |
| PCDHGA2     | ENSG00000081853.14 | 1.228179952  | -0.578649376 | -1.67137585  |
| TMEM38A     | ENSG00000072954.6  | 2.572200945  | 3.151019509  | 0.633048071  |
| AL137077.2  | ENSG00000283078.1  | 0.812157947  | -0.970273808 | -0.182334958 |
| C11orf94    | ENSG00000234776.4  | 1.020679831  | -1.131178526 | -1.070877818 |
| MIR4751     | ENSG00000283842.1  | -1.602124139 | -1.632071092 | -1.723489412 |
| AC023908.3  | ENSG00000261136.1  | -0.367404623 | 0.123434246  | -0.351401497 |
| SNORD70     | ENSG00000212309.1  | 0.005742963  | -0.717645551 | -0.978777587 |
| ZNF763      | ENSG00000197054.11 | -0.14151926  | -1.20197738  | 0.066407279  |
| ELOVL7      | ENSG00000164181.13 | -1.177956946 | 4.546028819  | 5.02746289   |
| TMEM178B    | ENSG00000261115.5  | 2.309206274  | -0.425559506 | 1.38183271   |
| RPL23P2     | ENSG00000176054.6  | -0.09502257  | 0.684296687  | 0.454613574  |
| ADAMTSL4-A  | ENSG00000203804.4  | -0.123877505 | 0.097757024  | -1.60192185  |
| IRX6        | ENSG00000159387.7  | -0.467650679 | 3.208945267  | 3.764783932  |
| ZC2HC1C     | ENSG00000119703.13 | -1.595841713 | 1.039606291  | 1.823656533  |
| MIR3198-2   | ENSG00000283803.1  | -1.682771278 | -1.886593836 | -1.850488171 |
| AL355802.2  | ENSG00000219470.1  | -0.686544756 | -1.230698201 | -0.830714599 |
| GPR162      | ENSG00000250510.7  | -0.764667358 | 0.652209037  | -1.216467822 |
| NRP1        | ENSG00000099250.17 | 5.360262923  | 3.393831261  | -0.067502534 |
| RASGRP3     | ENSG00000152689.17 | -1.834020233 | 2.297481084  | 4.799980061  |
| AC010980.1  | ENSG00000237732.9  | -0.765987802 | -0.864146315 | -1.023150832 |
| CDC42EP5    | ENSG00000167617.2  | 2.131633193  | 1.883794414  | 2.89308322   |
| RPL10P6     | ENSG00000230076.1  | 0.384222135  | -1.263823893 | -0.643853304 |
| SNORD102    | ENSG00000207500.1  | -1.461754756 | -1.470882583 | -1.7161338   |

|             |                    |              |              |              |
|-------------|--------------------|--------------|--------------|--------------|
| MIR5587     | ENSG00000266124.1  | 0.895903289  | -0.226297804 | 2.201678882  |
| AC008610.1  | ENSG00000248367.1  | -0.005516372 | -0.305924723 | 0.599780702  |
| PPP3CB-AS1  | ENSG00000221817.9  | 2.090412548  | 1.14591346   | -0.366362793 |
| AC009237.15 | ENSG00000273305.1  | 0.705507045  | -0.77160132  | 1.722258441  |
| TMEM202-AS  | ENSG00000261423.1  | -0.376476203 | -0.002730743 | -0.105817192 |
| EMG1        | ENSG00000268439.5  | 1.864678956  | 1.540227004  | 0.106424059  |
| IQGAP2      | ENSG00000145703.15 | 1.416052303  | -1.527916339 | 1.896036753  |
| AC027309.2  | ENSG00000253683.1  | 0.576695228  | 0.070866384  | -1.250109831 |
| SPTBN2      | ENSG00000173898.11 | 5.201016176  | 4.205494773  | 4.378441835  |
| AL662797.3  | ENSG00000272540.1  | 0.611015057  | 0.51522991   | -1.335347509 |
| AL031282.2  | ENSG00000268575.1  | 2.029414908  | -0.615734266 | 1.562997824  |
| AC124944.3  | ENSG00000260261.2  | -1.411715473 | 1.322213744  | 1.442925874  |
| HSP90B2P    | ENSG00000259706.1  | -0.060281852 | -1.527239407 | 0.869477522  |
| LINC02018   | ENSG00000272690.5  | 0.560729383  | -0.948161056 | -0.807453678 |
| Metazoa_SRF | ENSG00000277578.1  | -1.545612469 | -1.774155271 | -1.992992095 |
| SNORA57     | ENSG00000206597.1  | 4.340125609  | 2.23381152   | 1.949981558  |
| AC015909.3  | ENSG00000261959.1  | 1.903422725  | 3.904113792  | 1.55436187   |
| MIR6506     | ENSG00000284184.1  | 2.700650687  | 3.772110177  | 2.626351508  |
| AP000526.1  | ENSG00000271127.1  | -0.209105279 | 0.243404699  | -1.261226521 |
| RHOQP2      | ENSG00000232742.3  | -0.503859992 | 1.29452166   | 1.89941702   |
| UXT-AS1     | ENSG00000267064.1  | -0.742871179 | 0.320969125  | -0.407541114 |
| RPL7AP50    | ENSG00000213609.3  | 1.045600008  | 0.42464714   | -1.470248429 |
| SNORD51     | ENSG00000207047.2  | 0.305483299  | 0.586317455  | -0.54220391  |
| PMS2P6      | ENSG00000174384.9  | -0.033509049 | -0.266428518 | -0.264610171 |
| RFTN1       | ENSG00000131378.13 | 2.732355871  | 4.117288548  | -1.579801782 |
| GLIDR       | ENSG00000278175.3  | 1.440647947  | 0.302689031  | -1.580148791 |
| CASP10      | ENSG00000003400.14 | 2.335566651  | 3.030541963  | 4.597350041  |
| TCF7        | ENSG00000081059.19 | 1.618669014  | 1.49196322   | 4.741946284  |
| ZNF582      | ENSG00000018869.16 | 1.455560714  | 0.771979998  | 0.900950841  |
| AC011461.1  | ENSG00000267197.1  | -0.113752447 | 0.057279821  | -0.158771129 |
| LINC01234   | ENSG00000249550.6  | 4.769552574  | 4.460288456  | 1.21590208   |
| AL031848.2  | ENSG00000271746.1  | -1.022084454 | -0.238849514 | -1.070274093 |
| Z97832.2    | ENSG00000272374.1  | -1.500439774 | -0.526299825 | -0.039862421 |
| AL669831.4  | ENSG00000230092.7  | 0.794740252  | 0.666809409  | 0.677370904  |
| TCEA1P2     | ENSG00000230409.3  | -0.17004306  | 0.078597578  | 0.54930271   |
| MYB         | ENSG00000118513.18 | 1.651054263  | 1.137917347  | -1.703124514 |
| ACTG1P20    | ENSG00000241547.1  | 2.059280267  | -0.625731251 | -1.115170961 |
| AC068620.2  | ENSG00000269921.1  | 0.775759445  | 0.216420857  | 0.228904514  |
| Y_RNA       | ENSG00000201217.1  | 0.146867612  | 0.955523906  | -0.252562155 |
| CHN2        | ENSG00000106069.21 | 1.608925196  | 3.428116799  | 6.743245112  |
| PCNPP1      | ENSG00000258359.1  | 1.263812398  | 0.465679906  | -1.258175279 |
| HNRNPKP4    | ENSG00000243547.1  | -0.376171144 | -0.967105861 | -1.957053678 |
| AL591848.4  | ENSG00000260855.1  | -0.661509485 | -0.216130631 | -1.092902017 |
| Y_RNA       | ENSG00000200121.2  | -1.607248675 | -1.610691158 | -1.619499368 |
| SLC7A5P1    | ENSG00000260727.1  | 1.389153773  | 3.473903499  | 4.416820261  |
| AL031847.1  | ENSG00000226944.1  | 2.20246946   | 1.930927528  | -0.881940328 |

|            |                    |              |              |              |
|------------|--------------------|--------------|--------------|--------------|
| PRR19      | ENSG00000188368.9  | 1.352025115  | 2.072863719  | -1.313730425 |
| GPR160     | ENSG00000173890.16 | 0.337024568  | 3.827724439  | 2.510387796  |
| AC009137.2 | ENSG00000266801.1  | -0.861502728 | -0.085168027 | 0.885093216  |
| AC013731.1 | ENSG00000270557.1  | -1.803714295 | -0.087596252 | 0.259085224  |
| AC010654.1 | ENSG00000277369.1  | 0.821562157  | 1.096303784  | -0.562140651 |
| INTS6L     | ENSG00000165359.15 | 0.95669909   | -1.773181908 | 2.140597706  |
| AC002470.1 | ENSG00000272829.1  | 0.095861462  | -0.159196228 | -0.879792997 |
| AP000704.1 | ENSG00000224790.2  | -1.294777317 | -1.083116537 | 0.393285786  |
| AC068896.1 | ENSG00000258539.1  | 0.094866082  | 0.372797941  | 0.090482067  |
| AC114490.1 | ENSG00000241014.1  | 0.17063205   | -0.676763146 | -2.063380499 |
| LINC00173  | ENSG00000196668.3  | -0.630684707 | 2.434706718  | 1.474569627  |
| Y_RNA      | ENSG00000200170.1  | -0.120161036 | 0.499847169  | 1.293119845  |
| GAL3ST4    | ENSG00000197093.10 | 2.168151668  | 1.657603949  | -1.734629354 |
| NTN4       | ENSG00000074527.11 | 3.147271676  | -1.695091416 | -1.13671611  |
| FOXO3B     | ENSG00000240445.3  | 0.167242607  | -0.869139813 | 0.844767776  |
| ATP10B     | ENSG00000118322.12 | 3.020870019  | 2.527959265  | -1.167344931 |
| AC020898.1 | ENSG00000213757.3  | -0.661651108 | -1.123097949 | -1.276051025 |
| AL008729.2 | ENSG00000272379.1  | -0.573550541 | 4.916332486  | 3.580533868  |
| MIR6797    | ENSG00000276926.1  | 1.9144914    | 2.516099088  | 1.802460867  |
| LINC01023  | ENSG00000272523.1  | 1.150075904  | -0.346201141 | 1.701512109  |
| NP1PB11    | ENSG00000254206.5  | 0.014785016  | -1.02008372  | -0.203184534 |
| AC073487.1 | ENSG00000257509.1  | -0.302696373 | -0.100485698 | -0.627540405 |
| ONECUT2    | ENSG00000119547.5  | -1.904134639 | 1.64162121   | 0.93598118   |
| AL390879.2 | ENSG00000234062.7  | -0.589043829 | 0.488621292  | 1.372265597  |
| AC005911.1 | ENSG00000278356.1  | -0.524875044 | -0.09649171  | 0.596071737  |
| RN7SKP269  | ENSG00000202415.1  | 1.021447868  | 0.071053289  | -0.870620712 |
| ZNF575     | ENSG00000176472.10 | 1.975457592  | 0.233641959  | 2.052910072  |
| KCNJ14     | ENSG00000182324.6  | 0.944325602  | 1.458671836  | 0.311479064  |
| AL365181.3 | ENSG00000272405.1  | 6.048801905  | 1.253626468  | -1.413153413 |
| SLC25A34   | ENSG00000162461.7  | -0.236456314 | 0.791390215  | -0.809223954 |
| MIR1306    | ENSG00000284464.1  | -1.539931763 | -1.624721675 | -1.763577662 |
| MIR4687    | ENSG00000284525.1  | -1.494276181 | -1.446895063 | -1.544349572 |
| GCSHP3     | ENSG00000237580.1  | -1.775224095 | -1.66391799  | -1.688991735 |
| FTH1P10    | ENSG00000223361.5  | -0.61847229  | 0.04768506   | -0.120533873 |
| AC020910.5 | ENSG00000279329.1  | 1.363411903  | 0.959114751  | -0.559765378 |
| SNORA73A   | ENSG00000274266.1  | -1.288292618 | -1.574795091 | -1.609964693 |
| EEF1A1P9   | ENSG00000249264.1  | 0.421005798  | -1.064852877 | -1.009720081 |
| SHANK3     | ENSG00000251322.7  | 0.217591114  | 2.98559479   | 1.584816144  |
| AL645933.2 | ENSG00000272221.1  | -0.6081736   | -0.31016621  | -1.489922792 |
| AC008895.1 | ENSG00000279948.1  | -0.353599528 | -1.369949695 | -0.055364518 |
| MIR671     | ENSG00000284191.1  | -1.900953994 | -1.71574666  | -2.027916983 |
| AC005306.1 | ENSG00000267283.1  | -0.642890199 | 2.165005155  | 0.286569832  |
| ABCG2      | ENSG00000118777.10 | 1.230336196  | 2.285202688  | 3.159609649  |
| AL450003.2 | ENSG00000234779.1  | 1.484797634  | -0.457802824 | -0.875332604 |
| KANSL1-AS1 | ENSG00000214401.4  | 1.744996732  | -0.61646329  | 3.680345602  |
| AC007256.1 | ENSG00000213090.2  | -1.396885154 | -0.669725594 | 1.266476684  |

|            |                    |              |              |              |
|------------|--------------------|--------------|--------------|--------------|
| AL357140.2 | ENSG00000228150.1  | 0.321888369  | 1.040494425  | -0.326859453 |
| AC093010.3 | ENSG00000259976.3  | 0.734951543  | -1.421663482 | 2.030789952  |
| ANKRD23    | ENSG00000163126.14 | 0.136431442  | 3.437981707  | 3.311498002  |
| SNORA51    | ENSG00000271798.1  | 1.893998958  | 1.347462637  | -1.553605518 |
| MAP6D1     | ENSG00000180834.7  | 0.130252745  | 2.992711421  | 2.604572274  |
| RPS13P2    | ENSG00000228929.1  | 0.131345379  | -0.556112182 | -0.53530379  |
| MAP3K8     | ENSG00000107968.9  | -1.32515309  | 0.403586902  | 1.757854314  |
| C6orf52    | ENSG00000137434.11 | 0.050006287  | -1.374461473 | 0.780579029  |
| AP000487.1 | ENSG00000246889.2  | 0.496044561  | 0.198825185  | 0.61983022   |
| GNB3       | ENSG00000111664.10 | 2.238501081  | 2.030450335  | -0.531408938 |
| PDLIM1P4   | ENSG00000249274.1  | -0.233174556 | 2.180963704  | 3.541436912  |
| AC092070.2 | ENSG00000269001.2  | 0.141822157  | 2.218620987  | -1.581595139 |
| CHRNA10    | ENSG00000129749.3  | -1.167028418 | -1.203037421 | -0.423312258 |
| JMJD1C-AS1 | ENSG00000272767.1  | -1.555819461 | -1.404923247 | -1.590187885 |
| COL4A1     | ENSG00000187498.14 | 7.7860434    | 6.563168783  | -1.269077963 |
| IL11RA     | ENSG00000137070.17 | 3.406223944  | 1.482661967  | -1.477948371 |
| HMGB1P1    | ENSG00000124097.7  | -0.634274165 | 0.926082462  | -0.364215409 |
| AL122020.1 | ENSG00000213315.5  | -0.234850664 | -0.397838987 | -1.710205826 |
| DPY19L2P3  | ENSG00000227855.3  | -1.043972121 | 0.285324515  | -0.586187968 |
| C2orf82    | ENSG00000182600.9  | -0.745084286 | 1.578417917  | 0.045588405  |
| MED14OS    | ENSG00000234636.2  | -1.010317328 | -1.307115978 | -0.149884164 |
| SRRM3      | ENSG00000177679.15 | 3.027492938  | 4.799565835  | 3.109112038  |
| ITGB4      | ENSG00000132470.13 | -0.737188192 | 0.099818853  | 0.747215345  |
| DOCK3      | ENSG00000088538.12 | -1.930017848 | 1.754788891  | 2.536465955  |
| SAP30L-AS1 | ENSG00000245275.7  | -0.245388471 | -0.181555956 | 0.494212522  |
| ZNF626     | ENSG00000188171.15 | 3.086153555  | 2.609049102  | -1.552486462 |
| TSNAXIP1   | ENSG00000102904.14 | -0.633385168 | -0.983261831 | -0.091523677 |
| TAS2R15P   | ENSG00000212125.2  | -1.895511091 | -0.986101714 | 1.183396323  |
| TPI1P1     | ENSG00000226415.1  | 0.290581673  | -0.864419477 | -1.071969067 |
| AC108673.3 | ENSG00000273437.1  | 0.256030028  | -0.202631387 | 0.026841743  |
| AC011979.1 | ENSG00000239470.3  | 0.793842858  | -0.250814724 | -0.831603419 |
| AC026691.1 | ENSG00000270021.1  | -0.698346587 | -0.249060289 | 0.386623741  |
| AC097263.1 | ENSG00000228519.3  | -0.07039104  | -1.07380294  | -1.403104547 |
| AC084824.1 | ENSG00000257511.1  | -0.704256896 | -1.449306752 | -0.923111046 |
| TAPT1-AS1  | ENSG00000263327.6  | 0.524882648  | -0.47653061  | 1.487324431  |
| AC023055.1 | ENSG00000257390.5  | 4.162380501  | 0.126465749  | 0.599883811  |
| B4GALNT3   | ENSG00000139044.10 | 2.148551381  | 2.328041368  | 5.456704994  |
| HIST2H2AC  | ENSG00000184260.5  | 2.342022213  | 1.781793928  | -1.586908128 |
| CISH       | ENSG00000114737.15 | -1.429987312 | 1.867334778  | 0.731215493  |
| ARHGAP4    | ENSG00000089820.15 | 4.535461303  | 1.631441595  | 0.255946302  |
| AC084880.1 | ENSG00000213144.2  | -1.188583803 | 0.134755238  | 0.700253532  |
| HNRNPUL2-B | ENSG00000234857.2  | 3.111495841  | 1.81562824   | -0.803043482 |
| SLC2A3P1   | ENSG00000253861.1  | -1.342415332 | -1.545615169 | -1.556055974 |
| SLC13A3    | ENSG00000158296.13 | 1.973657553  | -2.111253174 | 0.96065462   |
| PLA2G4B    | ENSG00000243708.10 | 0.082669225  | 2.216250163  | 1.495099151  |
| SNORD25    | ENSG00000275043.1  | -1.409936307 | -1.602104756 | -1.94728229  |

|            |                    |              |              |              |
|------------|--------------------|--------------|--------------|--------------|
| AC005224.1 | ENSG00000231595.1  | 0.143625359  | -0.182754548 | -0.694751002 |
| ELL3       | ENSG00000128886.11 | -0.315853607 | 0.670771728  | -0.016566813 |
| EIF1B-AS1  | ENSG00000280739.2  | -1.560759373 | -0.929975015 | -0.906182535 |
| AC139530.3 | ENSG00000275902.1  | -0.889073649 | -0.398332011 | -0.970605662 |
| SPRED3     | ENSG00000188766.12 | 3.861754599  | 1.144311056  | 1.094073509  |
| AC124319.2 | ENSG00000263069.5  | -0.541135831 | -1.136175842 | 0.632302401  |
| IPO5P1     | ENSG00000269837.1  | 3.260087363  | 1.501506853  | 0.671334313  |
| PMS2P5     | ENSG00000123965.13 | 1.790252409  | 1.604706308  | 3.226617331  |
| AC096642.1 | ENSG00000277007.1  | -1.067497593 | -1.662130197 | -0.771160946 |
| AL022311.1 | ENSG00000279738.1  | -0.567344869 | -0.857569706 | -0.7493349   |
| COL5A2     | ENSG00000204262.11 | 5.243503144  | 5.12328793   | 0.201438802  |
| NPPA-AS1_3 | ENSG00000275915.1  | -0.102552381 | 0.353030474  | 0.858797049  |
| AC021755.3 | ENSG00000259584.1  | -1.108079034 | -1.048017894 | 0.739467115  |
| AF129075.1 | ENSG00000231125.2  | -1.182352134 | -0.684123673 | -0.823554735 |
| AC067750.1 | ENSG00000272631.1  | -0.121349977 | -0.960811362 | -1.013283502 |
| LCP2       | ENSG00000043462.11 | 1.409109187  | 5.784410767  | 5.95412357   |
| ARFGEF3    | ENSG00000112379.8  | -0.388740936 | 2.333898056  | 3.171957504  |
| SNORD1B    | ENSG00000199961.1  | 1.37924723   | 1.737455313  | 3.902691597  |
| AC078785.1 | ENSG00000240057.5  | 0.353365995  | -0.074464332 | 0.506564632  |
| AC005674.2 | ENSG00000261490.1  | -0.341614335 | -0.729454801 | 1.635493439  |
| SDCBP2     | ENSG00000125775.14 | 0.550997874  | 1.813109732  | -0.378867884 |
| KCNK2      | ENSG00000082482.13 | -0.833546675 | -1.547574502 | -1.838594686 |
| snoU2_19   | ENSG00000275146.1  | -1.593408387 | -1.981412132 | -1.406660213 |
| AC000068.1 | ENSG00000185065.6  | -0.562909138 | -0.91872706  | -1.171324721 |
| MIR4523    | ENSG00000284162.1  | -1.531662804 | -1.437430298 | -1.597903575 |
| AL732372.2 | ENSG00000237094.12 | 1.873188543  | 1.492148836  | 0.564374488  |
| NPW        | ENSG00000183971.6  | -0.214301355 | 0.019881791  | -0.091272826 |
| FBXO15     | ENSG00000141665.11 | -0.773922104 | -0.293894366 | 0.827896002  |
| SHB        | ENSG00000107338.9  | 4.891149122  | 4.041576202  | 2.391979754  |
| AL163051.1 | ENSG00000260806.1  | -0.061485885 | -0.017766081 | -1.792504425 |
| YWHAZP3    | ENSG00000229932.3  | -0.747402234 | -0.582652518 | -1.42250034  |
| AC124016.2 | ENSG00000273156.1  | -0.281757965 | -0.963281355 | -1.260670056 |
| CCDC146    | ENSG00000135205.14 | -1.211059294 | 1.086211461  | 0.935388041  |
| PHOSPHO1   | ENSG00000173868.11 | -0.317850317 | 0.329294569  | -1.176097677 |
| SCARNA22   | ENSG00000249784.1  | 2.681311017  | -0.174563814 | -0.146378929 |
| AL031719.2 | ENSG00000280231.1  | 0.357719536  | -1.751300887 | 2.050361477  |
| SEMA3D     | ENSG00000153993.13 | 2.280983727  | -1.726357847 | 2.946665208  |
| AC005005.3 | ENSG00000273387.1  | 0.789312887  | 2.168645874  | 0.853643991  |
| AP000866.6 | ENSG00000279342.2  | 0.051773056  | -0.833890166 | -0.850337537 |
| INPP5J     | ENSG00000185133.13 | 1.134902292  | -1.539542928 | 0.045502128  |
| AC079305.1 | ENSG00000222043.2  | -1.366351273 | 0.069580662  | 0.007490551  |
| LCMT1-AS1  | ENSG00000260448.5  | 0.408532688  | 0.019098182  | 0.178729839  |
| MAP3K7CL   | ENSG00000156265.15 | 0.22755117   | 1.530822348  | 1.34490269   |
| AC011499.1 | ENSG00000267157.1  | -0.309068805 | -1.003515239 | -0.683142483 |
| MIR3605    | ENSG00000284154.1  | 1.869259169  | 0.014818804  | 1.213296322  |
| CDRT4      | ENSG00000239704.10 | 1.453983746  | 0.556453893  | -0.76214625  |

|            |                    |              |              |              |
|------------|--------------------|--------------|--------------|--------------|
| FAM212A    | ENSG00000185614.4  | 0.315637131  | 4.182571903  | -1.767125743 |
| AC080080.1 | ENSG00000279048.1  | -1.544652068 | -0.351232955 | -0.583803702 |
| KCNG1      | ENSG00000026559.13 | 5.783956362  | 3.94981465   | -0.865860666 |
| ZNF540     | ENSG00000171817.16 | -1.636361754 | -1.326402929 | 0.614561928  |
| AC012181.3 | ENSG00000261270.1  | 0.792279812  | 2.571507315  | 2.178974102  |
| CFAP53     | ENSG00000172361.5  | -0.303444197 | -1.661765319 | -1.705425325 |
| INHA       | ENSG00000123999.4  | 0.985963051  | -1.32507243  | -0.496200914 |
| SNORA59A   | ENSG00000239149.1  | 0.414208097  | 0.765847473  | 0.801374972  |
| AC022558.1 | ENSG00000259767.1  | -0.879421831 | -0.980648154 | -1.078900361 |
| AL355032.1 | ENSG00000241494.1  | 0.086809574  | -1.399377375 | -0.781753309 |
| AC008622.2 | ENSG00000275719.1  | 1.006363324  | -0.416780651 | 2.179438326  |
| AC007683.1 | ENSG00000224415.1  | -1.292811095 | -0.314781908 | -1.250994812 |
| AC156455.1 | ENSG00000256546.1  | -0.095314416 | 0.846607536  | 2.179196207  |
| LONRF2     | ENSG00000170500.12 | 2.778224612  | 3.551074007  | 1.879038401  |
| AC006001.4 | ENSG00000275400.1  | -1.721718912 | -1.443249599 | -2.142524591 |
| TIGD4      | ENSG00000169989.2  | 0.897250268  | 0.670030012  | 1.509229883  |
| SNORA79B   | ENSG00000222489.1  | 0.674213721  | -0.184050506 | 1.667809864  |
| AL356299.2 | ENSG00000272945.1  | 0.268509074  | 0.331874076  | -0.744182016 |
| TFAP2E     | ENSG00000116819.6  | -1.925924883 | 0.004734697  | 0.394852139  |
| SNORD26    | ENSG00000276788.1  | 4.543668908  | 3.614055236  | 2.988609902  |
| NID1       | ENSG00000116962.14 | 7.545115344  | -2.132992569 | 5.038134677  |
| AL031666.3 | ENSG00000273451.1  | -0.280322106 | 0.484689001  | -0.867407255 |
| AC139795.3 | ENSG00000272459.1  | -1.36047038  | -1.318864549 | -0.439950875 |
| MYCL       | ENSG00000116990.10 | -0.001586359 | 0.891815691  | 0.066258992  |
| AL442128.2 | ENSG00000277767.1  | -0.683455696 | -0.810045758 | -0.324900202 |
| AC091152.2 | ENSG00000267160.1  | -0.735537012 | -0.210796269 | -0.774776936 |
| TNFSF13    | ENSG00000161955.16 | -1.522853885 | -0.888673804 | 3.385991826  |
| PAQR7      | ENSG00000182749.5  | 3.84357165   | 3.109940181  | 3.858678228  |
| AL157400.5 | ENSG00000249962.1  | -0.970075797 | -0.332331329 | -2.056029446 |
| CUBN       | ENSG00000107611.14 | 0.138220566  | 0.287572681  | -0.80162786  |
| SNORD50    | ENSG00000202335.1  | -1.620018973 | -1.666721497 | -1.714849271 |
| CEP295NL   | ENSG00000178404.9  | -1.287068095 | -0.10226564  | 0.648649054  |
| SSSCA1-AS1 | ENSG00000260233.3  | 0.444451507  | 0.838349735  | 1.008708207  |
| AL391825.1 | ENSG00000229808.1  | 1.656007916  | 1.465501954  | 0.589941464  |
| ZCCHC18    | ENSG00000166707.10 | -0.19839915  | -0.890440435 | -1.451336008 |
| BPTFP1     | ENSG00000263647.1  | -1.530712871 | -1.359616757 | -1.890085225 |
| SSC4D      | ENSG00000146700.8  | -1.036523933 | -0.101263314 | -1.902238012 |
| AL645940.1 | ENSG00000272217.1  | 1.091979981  | -0.32096678  | -0.245952445 |
| FTH1P7     | ENSG00000232187.1  | -1.134638937 | -1.294833648 | -0.744028901 |
| AC099522.2 | ENSG00000272525.1  | 1.908882831  | -0.663886127 | 1.231971452  |
| SLC45A2    | ENSG00000164175.14 | -1.696703764 | 8.457650276  | 8.441725759  |
| snoZ196    | ENSG00000281780.1  | 0.153927621  | 0.505464766  | 0.722181168  |
| EIF5AL1    | ENSG00000253626.3  | 0.173354528  | -1.521718993 | -1.682951823 |
| AC100778.2 | ENSG00000263916.1  | -1.305929134 | -1.950868513 | -0.370305469 |
| FAP        | ENSG00000078098.13 | 2.309774834  | 2.677360706  | 1.943801139  |
| HIST2H2BC  | ENSG00000203819.6  | 0.69495486   | 0.652171755  | -1.254936466 |

|             |                    |              |              |              |
|-------------|--------------------|--------------|--------------|--------------|
| AC112484.2  | ENSG00000231305.3  | -1.494369565 | -1.05145653  | 0.05994836   |
| AC022762.2  | ENSG00000267940.1  | -1.53480336  | 0.027792997  | -0.993961964 |
| PARD3B      | ENSG00000116117.17 | -2.017074061 | 1.657188931  | 2.659101112  |
| PTGES       | ENSG00000148344.10 | 6.289078756  | 3.250747797  | 0.174798379  |
| CDK5R2      | ENSG00000171450.5  | -0.892734984 | -0.467807802 | -0.716844267 |
| ZNFX1-AS1_3 | ENSG00000277967.1  | -0.921973268 | -1.770063565 | -1.701237186 |
| TNFRSF11A   | ENSG00000141655.16 | -0.135048366 | 1.073426846  | 0.694371131  |
| FUT8-AS1    | ENSG00000276116.2  | 0.932629998  | -0.83643941  | -1.028268292 |
| EFNA3       | ENSG00000143590.13 | 2.477964249  | 2.646714977  | 0.852439549  |
| AL121772.1  | ENSG00000274414.1  | 2.993171432  | -0.319979236 | -1.804361741 |
| GPM6B       | ENSG00000046653.14 | -2.164630037 | 6.250542699  | 7.692793196  |
| AC005829.1  | ENSG00000261575.2  | -0.912762147 | 0.193027745  | 1.730142556  |
| AC005520.1  | ENSG00000258653.3  | -0.763475542 | -0.981558431 | 0.392182332  |
| RTCA-AS1    | ENSG00000224616.1  | 0.515812453  | 0.788307782  | -1.041712432 |
| FMR1-IT1    | ENSG00000236337.1  | -0.955825764 | 0.632926755  | -0.205002846 |
| SATB1       | ENSG00000182568.16 | 2.766150629  | 3.885118749  | 4.052933271  |
| U73166.1    | ENSG00000230454.1  | 1.834291115  | -0.268291805 | -1.954655485 |
| SNORA7B     | ENSG00000207088.1  | 1.592443659  | 2.120841342  | -0.06351857  |
| AC007637.1  | ENSG00000256139.2  | -0.976018093 | 1.262278393  | -0.037177585 |
| FAHD2CP     | ENSG00000231584.8  | 1.24368025   | 2.927629163  | 1.92058285   |
| AL138759.1  | ENSG00000244332.1  | 3.516290109  | 2.211660152  | -0.361890419 |
| ANKRD6      | ENSG00000135299.16 | 0.543994458  | 4.624687346  | 4.365670864  |
| GNL3LP1     | ENSG00000215032.2  | 0.791611951  | 0.321966836  | 1.189938228  |
| AC009078.3  | ENSG00000280152.1  | -1.929984819 | -1.29040653  | -1.596480798 |
| RSC1A1      | ENSG00000215695.1  | -1.220820053 | -1.609368302 | -1.628585248 |
| MIR3191     | ENSG00000284411.1  | -1.900934776 | -0.594880336 | -1.698464851 |
| AC009309.1  | ENSG00000273080.1  | 1.866974954  | 1.322176166  | -0.411942989 |
| AC136632.1  | ENSG00000218227.3  | 0.086538106  | -0.876603351 | 0.029868406  |
| ZDHHC2      | ENSG00000104219.12 | 3.3370641    | 2.30890398   | 4.781898513  |
| AC022893.1  | ENSG00000253636.1  | -0.300010316 | -1.462763508 | -1.743773061 |
| TPTE2P6     | ENSG00000205822.10 | -0.795471273 | 0.458606351  | 0.692512732  |
| AC084824.4  | ENSG00000275854.1  | -0.82781366  | -0.128165952 | -0.399601031 |
| AC022613.2  | ENSG00000259523.1  | 0.253487753  | -0.641109822 | -1.130206179 |
| TECRP1      | ENSG00000235043.3  | -0.303491699 | -0.974617901 | -0.103449235 |
| AC090004.1  | ENSG00000268279.4  | -0.386859356 | -0.287689729 | -1.053930391 |
| RASL11A     | ENSG00000122035.6  | 1.800096866  | 0.373631941  | 0.298271724  |
| AC022150.4  | ENSG00000269825.1  | 3.008417034  | 1.772037337  | 2.924633066  |
| AC019205.3  | ENSG00000235174.1  | 1.911495855  | 0.490508652  | 1.296793411  |
| AC015712.6  | ENSG00000272808.3  | 0.828344498  | -1.998082661 | 2.838670949  |
| AC067931.2  | ENSG00000280303.2  | 0.957336272  | -1.55204128  | -2.208960702 |
| HCG25       | ENSG00000232940.5  | 1.409176046  | 0.355939502  | 1.839253277  |
| AC006111.2  | ENSG00000263235.1  | 2.0559078    | -0.426666822 | -1.688052377 |
| MIR1281     | ENSG00000284015.1  | -1.68378905  | -1.543126553 | -1.579739609 |
| AC026471.4  | ENSG00000261474.1  | 2.155293759  | 1.54719993   | -1.136519613 |
| MIR3610     | ENSG00000283956.1  | -1.663322367 | -1.738295555 | -1.849085731 |
| Y_RNA       | ENSG00000200651.1  | -0.39325315  | 2.069502538  | 1.320876047  |



|             |                    |              |              |              |
|-------------|--------------------|--------------|--------------|--------------|
| AC127459.1  | ENSG00000260566.2  | 0.139720437  | -0.104545038 | 0.656169488  |
| AC023024.1  | ENSG00000259172.1  | -1.747185392 | -0.665264828 | -0.896082908 |
| CEP83-AS1   | ENSG00000278916.1  | -0.68936874  | -0.421645265 | -1.24396939  |
| AC024909.3  | ENSG00000274021.1  | 0.085176282  | 1.151689119  | -1.718516799 |
| MORF4L2-AS1 | ENSG00000231154.1  | -1.966535026 | -1.381922483 | -1.418182605 |
| BCO2        | ENSG00000197580.11 | -1.637678242 | 0.827484425  | 0.819210704  |
| AC108673.2  | ENSG00000273174.1  | 0.138020591  | -1.337139593 | 0.195210556  |
| SNORA27     | ENSG00000207051.1  | -1.068058952 | -1.497992656 | -1.773966827 |
| C16orf74    | ENSG00000154102.10 | 1.370791843  | 2.303547538  | -2.089777692 |
| AP002847.1  | ENSG00000279138.1  | -1.659360588 | -1.073475974 | 0.515960917  |
| GRPR        | ENSG00000126010.5  | -1.892335851 | -0.864293449 | -0.792543085 |
| LENG9       | ENSG00000275183.1  | 3.492516974  | 2.600191167  | -1.926337506 |
| ST20-MTHFS  | ENSG00000259332.3  | 0.891764807  | 2.562328383  | 1.477372342  |
| AL139407.1  | ENSG00000277687.1  | -0.859334029 | -0.690849402 | 1.489767497  |
| RUSC1-AS1   | ENSG00000225855.6  | 1.919446888  | 0.859903283  | 0.40747868   |
| PDIA3P2     | ENSG00000224677.1  | 0.719958082  | -0.196513797 | -1.304548324 |
| FAM169A     | ENSG00000198780.11 | 3.417846754  | 1.419076184  | 3.376994591  |
| PSPC1P1     | ENSG00000227879.2  | -0.231212217 | -0.285174976 | -1.425247574 |
| NRTN        | ENSG00000171119.2  | 1.716884689  | 2.482896069  | 2.966908542  |
| C14orf37    | ENSG00000139971.15 | -1.27860109  | 2.679578066  | 2.785568924  |
| FIRRE       | ENSG00000213468.5  | 1.168957002  | 1.497042132  | -1.054079104 |
| uc_338      | ENSG00000274420.1  | -1.201143612 | -1.98834179  | -2.079029531 |
| ACBD7       | ENSG00000176244.6  | 1.802111925  | -1.175753001 | -0.212963584 |
| AC004839.1  | ENSG00000272854.1  | 0.069009638  | -0.894757936 | -1.680145573 |
| ASLP1       | ENSG00000244723.3  | -0.864955082 | 0.204634072  | -0.413625582 |
| AC073389.1  | ENSG00000268584.1  | 0.355106452  | -1.134722663 | -0.58904342  |
| HIST1H2BL   | ENSG00000185130.5  | -1.018088771 | -1.05418106  | -1.619253551 |
| ADNP-AS1    | ENSG00000259456.3  | -1.147385174 | -0.755095654 | -1.290010039 |
| CRISPLD1    | ENSG00000121005.8  | 3.7154317    | 4.038322522  | 3.53449913   |
| AC073352.1  | ENSG00000272662.1  | -0.47200234  | -0.943603926 | -1.923716801 |
| AC138393.3  | ENSG00000278467.1  | 0.831463354  | -0.253094839 | -1.430030828 |
| AC013394.1  | ENSG00000279765.3  | 0.133274836  | -1.014899761 | 1.019884654  |
| AL365434.2  | ENSG00000273124.1  | 2.666115527  | -1.299337062 | -1.16365756  |
| AC017083.2  | ENSG00000273064.1  | -1.091446024 | -0.218928378 | -1.453987374 |
| AC021945.1  | ENSG00000279347.1  | 0.399825522  | -0.861917402 | -1.997728331 |
| NDUFA4L2    | ENSG00000185633.10 | 2.00347578   | 0.216842117  | 2.098274171  |
| IQCH-AS1    | ENSG00000259673.5  | 1.843508157  | -0.754601043 | 1.52006214   |
| LINC02021   | ENSG00000249846.6  | -0.283012627 | 0.668179486  | -0.597370595 |
| SLC9A7      | ENSG00000065923.9  | 2.917249118  | 2.935812113  | 3.083292493  |
| ZEB1        | ENSG00000148516.21 | 4.25287843   | 0.544063544  | 3.357407683  |
| RNA5SP244   | ENSG00000212238.1  | -1.49773729  | -1.860245687 | -1.91303586  |
| BOC         | ENSG00000144857.14 | 2.312918749  | 2.051686491  | 2.773558632  |
| KCNJ2       | ENSG00000123700.4  | -0.040979617 | -1.047129159 | -0.335994468 |
| ZNF788      | ENSG00000214189.8  | 4.710473322  | -0.893137945 | 2.668806025  |
| C1QTNF3     | ENSG00000082196.20 | 0.971497978  | -0.737496639 | 0.090232414  |
| C7orf61     | ENSG00000185955.4  | -0.797210906 | -0.753210758 | -1.24041603  |

|            |                    |              |              |              |
|------------|--------------------|--------------|--------------|--------------|
| MIR4775    | ENSG00000284079.1  | -1.62475552  | -1.360866819 | -1.778817322 |
| KLHL7-AS1  | ENSG00000230658.1  | -1.039383068 | 0.319847958  | 2.570319106  |
| TRIM51     | ENSG00000124900.12 | 3.389770594  | 2.874337343  | 4.462742786  |
| SNORD14B   | ENSG00000201403.1  | -1.80133586  | -1.914953286 | -2.066917768 |
| ENO1-IT1   | ENSG00000236269.1  | 0.068776011  | -0.266091529 | -0.11761682  |
| SUSD5      | ENSG00000173705.8  | 4.194248743  | 0.698515595  | 1.896810054  |
| CLDND2     | ENSG00000160318.6  | 2.154883718  | 0.078273207  | -1.007011113 |
| AC073107.1 | ENSG00000272693.3  | -1.299614009 | -0.864860601 | -2.065154373 |
| FAM72C     | ENSG00000263513.5  | 2.175330477  | 0.76817818   | -1.25140498  |
| AC099343.2 | ENSG00000270426.1  | -1.476912839 | -0.998873796 | -0.956043605 |
| LINC00461  | ENSG00000245526.10 | 1.922867862  | -1.140393484 | -1.931634044 |
| SLC26A4    | ENSG00000091137.11 | -0.72830811  | 0.205896289  | 1.907509213  |
| AC241585.3 | ENSG00000281571.2  | 0.372707725  | 0.903485033  | -1.161824954 |
| NBPF25P    | ENSG00000272150.5  | -0.984800604 | -0.361967171 | -1.445837322 |
| METTL7A    | ENSG00000185432.11 | 1.715110197  | -1.840598422 | 2.520846169  |
| AC005329.1 | ENSG00000248015.6  | 0.902045891  | -0.368749213 | -1.049384553 |
| SNORA40    | ENSG00000210825.1  | -1.862808401 | -2.055356918 | -2.215650308 |
| NMRAL2P    | ENSG00000171658.8  | -1.262185521 | 1.697331775  | 2.564574849  |
| AC010894.2 | ENSG00000226853.2  | 1.041685565  | 1.565329481  | 1.615828503  |
| AC027612.3 | ENSG00000232531.3  | -0.920207923 | -1.963549503 | -0.942345593 |
| AC009118.3 | ENSG00000276259.1  | 1.46175631   | -1.063983414 | -0.58589229  |
| RNU6-312P  | ENSG00000201499.1  | -0.366490251 | 0.281531726  | 0.095733602  |
| LOXL2      | ENSG00000134013.15 | 6.3764687    | 2.815007143  | -1.864084731 |
| AC016629.1 | ENSG00000268784.1  | -1.613708684 | -1.741768828 | -1.810628994 |
| uc_338     | ENSG00000274051.1  | -0.345943089 | 0.976467255  | 0.358305215  |
| CCDC17     | ENSG00000159588.14 | -1.119972945 | -0.153285565 | -2.263146887 |
| AL356056.2 | ENSG00000231187.2  | 0.825481074  | -0.669696363 | -0.415558947 |
| AC025164.2 | ENSG00000245904.3  | -0.831052211 | -0.340465434 | -0.116854162 |
| LINC01232  | ENSG00000280734.2  | 2.469227574  | -1.220345305 | 0.163149316  |
| PRKAG2-AS1 | ENSG00000239911.2  | 0.311809485  | 2.347951594  | 0.455847603  |
| DLG2       | ENSG00000150672.16 | 1.647436673  | -0.959846003 | 1.186832116  |
| ZNF596     | ENSG00000172748.13 | 1.572212427  | 0.576092079  | 0.556021233  |
| AL080276.2 | ENSG00000227627.2  | -0.651502003 | -1.433752203 | -0.140272888 |
| SLIT2      | ENSG00000145147.19 | 2.700113063  | -1.727957253 | 1.726653183  |
| FAM35BP    | ENSG00000165874.12 | 0.079756388  | -1.530435797 | -1.852912319 |
| AL138995.1 | ENSG00000277763.1  | -0.90436495  | -1.125640738 | 1.171433319  |
| AC010997.4 | ENSG00000272692.1  | -1.482173095 | -0.779390935 | -0.405006014 |
| LINC02361  | ENSG00000256576.2  | -1.902926081 | -2.008990132 | -1.181798012 |
| RPL13AP20  | ENSG00000234498.3  | 2.001485043  | 0.224162936  | -1.668174249 |
| AC004492.1 | ENSG00000272072.1  | -1.122445084 | -1.608775147 | -0.37312275  |
| SNORD42B   | ENSG00000238423.1  | 1.472157178  | 1.477602907  | -0.408959397 |
| LYZ        | ENSG00000090382.6  | 4.119238338  | -0.354643433 | 0.022110241  |
| NECTIN1    | ENSG00000110400.10 | 4.684021656  | 3.422924878  | -1.772535605 |
| CNKSR2     | ENSG00000149970.14 | 3.083957281  | 1.737059778  | 1.624183712  |
| APBA1      | ENSG00000107282.7  | -2.226994876 | 2.176070456  | 0.47353054   |
| AC026471.6 | ENSG00000280132.1  | 0.357649769  | -0.768280702 | 0.887511244  |

|            |                    |              |              |              |
|------------|--------------------|--------------|--------------|--------------|
| SNORD45C   | ENSG00000206620.1  | -1.842485338 | -1.738701843 | -2.292727089 |
| ANXA2P2    | ENSG00000231991.4  | -0.45610071  | -0.419428094 | -1.670183338 |
| AC092803.2 | ENSG00000260805.2  | 0.524212752  | -1.124025003 | 0.982563148  |
| BRSK2      | ENSG00000174672.15 | 0.949328656  | 3.615210093  | 0.440935561  |
| AC011477.1 | ENSG00000267419.2  | 2.474324627  | 1.778254094  | 0.952293064  |
| AC073367.1 | ENSG00000225213.2  | -2.061891206 | 0.117095141  | 0.962587967  |
| CALML6     | ENSG00000169885.9  | -1.093020962 | -1.169325094 | -2.127249309 |
| MIR6087    | ENSG00000275110.1  | -1.439789206 | -0.30952266  | -0.33558534  |
| FAM86B1    | ENSG00000186523.14 | 0.644669404  | 0.484232949  | -1.130322321 |
| EMILIN1    | ENSG00000138080.13 | 7.131035499  | -1.923689305 | 6.26023848   |
| NTNG2      | ENSG00000196358.10 | 0.427845546  | 1.466203743  | -0.887986701 |
| AL080317.2 | ENSG00000271789.1  | -0.641357565 | 0.980462314  | -0.729404619 |
| AC008752.3 | ENSG00000267370.1  | -1.208708547 | -1.095023683 | 1.068036892  |
| B4GALNT1   | ENSG00000135454.13 | 6.049238167  | 1.281246177  | 4.202485127  |
| CLTCL1     | ENSG00000070371.15 | 2.523017959  | 1.539686298  | -1.907038786 |
| ARHGAP28   | ENSG00000088756.12 | -1.374316925 | 2.012412399  | 0.936734529  |
| HSPD1P4    | ENSG00000257576.1  | -1.32526847  | -1.724497624 | -1.650080152 |
| AC002094.4 | ENSG00000277450.1  | -0.636135199 | 0.926069593  | 0.766430002  |
| AL139424.2 | ENSG00000284642.1  | -0.238037347 | -0.03675677  | -1.914095708 |
| MIR4517    | ENSG00000284541.1  | -1.569227876 | -1.637713073 | -1.887940247 |
| UGDH-AS1   | ENSG00000249348.1  | -0.806354584 | -1.654297571 | 1.926917358  |
| RGS9BP     | ENSG00000186326.3  | 0.101924612  | 0.179185576  | 1.399596343  |
| AL024507.2 | ENSG00000272476.1  | 1.102713096  | 0.389599607  | -1.667625544 |
| AC004943.1 | ENSG00000259209.3  | -0.84276371  | -1.067091481 | -0.806631501 |
| AC005540.1 | ENSG00000235852.1  | 0.603872381  | 0.681006851  | 1.77769486   |
| RPL3P2     | ENSG00000227939.1  | -0.172573953 | -0.616030332 | -1.031002126 |
| PTPRU      | ENSG00000060656.19 | 3.337730442  | 5.725532496  | -1.53217709  |
| AC128688.2 | ENSG00000261488.1  | -0.693864822 | 0.214547131  | 0.823829768  |
| FAM71F2    | ENSG00000205085.11 | -1.617187304 | 0.23941786   | -1.397933104 |
| SOX8       | ENSG00000005513.9  | 1.643312332  | 2.517273624  | 3.84588757   |
| WTIP       | ENSG00000142279.12 | -2.290554703 | -0.44536783  | -2.178739579 |
| TREX2      | ENSG00000183479.12 | 2.179756401  | 2.653700078  | -0.085865638 |
| RAG1       | ENSG00000166349.9  | -0.290770525 | -0.95543445  | 1.236950577  |
| TNS1       | ENSG00000079308.16 | -1.913728411 | 2.740933408  | 4.737952023  |
| CCNYL2     | ENSG00000182632.15 | 1.155398915  | 2.150139737  | 2.678089015  |
| AC125388.1 | ENSG00000241069.1  | -1.707068872 | -1.686147078 | -1.98038024  |
| AL603750.1 | ENSG00000280099.1  | -1.781045823 | -0.643370913 | -1.326718192 |
| AC013403.2 | ENSG00000272148.1  | -0.645499221 | 1.146953435  | -2.203715453 |
| PDE5A      | ENSG00000138735.15 | 1.269818714  | 2.759111597  | 2.293610016  |
| AP006222.1 | ENSG00000228463.10 | -1.233595158 | -0.128949995 | -1.270672877 |
| MORF4L1P1  | ENSG00000218283.2  | -0.169217094 | -0.717277494 | -0.389131677 |
| RNU6-146P  | ENSG00000207332.1  | -1.677831592 | -2.068764866 | -1.681173485 |
| GNAL       | ENSG00000141404.15 | 1.113956665  | 4.136924975  | -0.995867968 |
| PCDHGA7    | ENSG00000253537.2  | 2.868289067  | 2.285386784  | -1.739359363 |
| AC126474.1 | ENSG00000279148.1  | 1.275964135  | -0.538198571 | -1.452433527 |
| SOCS1      | ENSG00000185338.4  | -1.834432928 | -0.751380226 | 0.166899494  |

|            |                    |              |              |              |
|------------|--------------------|--------------|--------------|--------------|
| MIR612     | ENSG00000283791.1  | -1.869260758 | -1.475690432 | -2.013146205 |
| IDI2-AS1   | ENSG00000232656.7  | -1.387255413 | 0.971772839  | 4.669430977  |
| AL162258.2 | ENSG00000272030.1  | 1.531968285  | 0.830743585  | -0.003700694 |
| AC127070.5 | ENSG00000278949.1  | -0.395465621 | -0.648349664 | -1.289169962 |
| AC008434.1 | ENSG00000249655.1  | -1.707813587 | -1.767474517 | -1.146308356 |
| AGGF1P2    | ENSG00000233435.2  | -0.742984488 | -0.582236505 | 0.868603164  |
| ZNF114     | ENSG00000178150.9  | -2.080937548 | 5.003146536  | -0.918453423 |
| SNORD55    | ENSG00000264294.1  | -1.868449244 | -1.936842608 | -2.114421003 |
| AC005785.2 | ENSG00000279203.1  | 0.555838411  | 0.844009493  | -0.868499897 |
| RBFADN     | ENSG00000261126.7  | -0.688251346 | -0.303428234 | -1.63407517  |
| AC245297.1 | ENSG00000215861.5  | 0.331216966  | 1.661333195  | 2.602598034  |
| TMEM110-M  | ENSG00000248592.7  | 0.678060613  | 1.057734483  | -2.187290692 |
| AC098583.1 | ENSG00000244538.1  | 0.175672498  | -0.824002683 | -1.089365246 |
| AL442663.3 | ENSG00000258813.2  | -1.073015593 | -0.770108433 | -0.666931944 |
| AC244093.4 | ENSG00000277589.1  | -1.293141836 | -0.627458668 | -0.199506949 |
| AC053513.1 | ENSG00000256973.1  | 0.415379024  | -0.38754415  | -0.56657466  |
| AC009570.1 | ENSG00000272986.1  | -1.521648687 | -0.263580483 | 0.295350369  |
| IRF4       | ENSG00000137265.14 | -2.315624442 | 5.822498583  | 6.130535979  |
| YWHABP2    | ENSG00000256464.1  | -0.058285393 | -0.432814283 | -0.629203507 |
| AL136304.1 | ENSG00000272223.1  | 0.628514759  | 0.692005258  | -0.495217998 |
| TUB        | ENSG00000166402.8  | 2.416686217  | 4.460327719  | 3.357641733  |
| TUBA3FP    | ENSG00000161149.12 | 0.360399287  | -0.046793948 | -0.857728375 |
| AC021106.1 | ENSG00000249863.2  | 1.977626789  | 0.276669678  | 1.763196362  |
| AC131009.4 | ENSG00000279283.1  | -2.308905008 | -1.390786532 | 0.295789567  |
| ADAM12     | ENSG00000148848.14 | 1.989416574  | 0.467466131  | -0.360366869 |
| AC025682.1 | ENSG00000263766.5  | -1.091360344 | 0.284303617  | 1.891493623  |
| BMS1P4     | ENSG00000242338.6  | 0.288788159  | -0.604605349 | -0.238873826 |
| CENPS-CORT | ENSG00000251503.8  | 1.360979509  | 0.618047693  | -0.893999207 |
| AP000866.1 | ENSG00000245498.6  | -1.130276988 | -1.882329631 | 0.183786154  |
| SNORD88B   | ENSG00000221381.1  | 4.388342513  | 4.545134492  | 3.115210901  |
| ZNF502     | ENSG00000196653.11 | 0.929819514  | 1.364431749  | -2.104230946 |
| AC108727.1 | ENSG00000248773.1  | -1.525643615 | -0.152187652 | -1.25932429  |
| PRRT3      | ENSG00000163704.11 | 1.123863725  | 1.84738123   | 2.298271215  |
| MIR6845    | ENSG00000284142.1  | -1.597196203 | -1.617174383 | -2.283027046 |
| AC245100.4 | ENSG00000231551.8  | -1.043689555 | 0.822720319  | -1.612982383 |
| AC241952.1 | ENSG00000275131.2  | -1.457621074 | 0.880292516  | 0.143475003  |
| PPIAP11    | ENSG00000251495.1  | 0.252546187  | 0.212878975  | -1.074333464 |
| RPS6P25    | ENSG00000240616.1  | -0.069258491 | 0.083357924  | -0.044842018 |
| RPL39P34   | ENSG00000242255.1  | -1.568441319 | -0.965551781 | -1.435975105 |
| LEPR       | ENSG00000116678.19 | 0.981549506  | -2.41253911  | 3.037336128  |
| LCA5L      | ENSG00000157578.13 | -0.236350958 | -0.003668944 | -0.204312067 |
| RCOR2      | ENSG00000167771.5  | -0.310702357 | 0.847647175  | 3.030190215  |
| LINC01002  | ENSG00000282508.1  | 1.17101341   | 1.533119681  | 0.477762365  |
| GPR75-ASB3 | ENSG00000270898.5  | -0.219062032 | -0.85036964  | -1.916379745 |
| AC137630.3 | ENSG00000272434.1  | 1.142407127  | 1.325004762  | -1.671388419 |
| FAM171A1   | ENSG00000148468.16 | 3.887665699  | 4.264999002  | -2.362404347 |

|            |                    |              |              |              |
|------------|--------------------|--------------|--------------|--------------|
| STX11      | ENSG00000135604.9  | -1.633094135 | 3.432141459  | -1.941365088 |
| KIF21B     | ENSG00000116852.14 | 4.236868877  | -0.801596174 | -2.316965538 |
| DIP2A-IT1  | ENSG00000223692.1  | -1.197679197 | -1.173642755 | -1.800497104 |
| MIR6084    | ENSG00000284005.1  | -1.992111831 | -1.84191085  | -2.149819333 |
| AL391834.2 | ENSG00000273226.1  | 0.613373537  | 0.01977447   | 1.541925148  |
| AC068491.4 | ENSG00000279191.1  | -2.180957752 | -1.044350689 | -1.609322527 |
| ALDH3B1    | ENSG00000006534.15 | 3.196865255  | 2.795559329  | -2.018221197 |
| STAM-AS1   | ENSG00000260589.1  | -2.293021938 | -0.713888299 | -1.030935989 |
| AL122035.1 | ENSG00000258824.2  | -0.273066419 | 0.398658816  | -1.310221635 |
| AHNAK2     | ENSG00000185567.6  | 1.462331827  | 3.427919577  | -2.234687127 |
| MIR937     | ENSG00000284224.1  | -0.365496299 | 0.541944406  | -2.100735323 |
| GPC6       | ENSG00000183098.10 | 4.811205559  | 3.432117823  | 1.331500137  |
| AC040169.3 | ENSG00000274677.1  | 0.304915953  | -1.116063104 | -0.098134752 |
| CRABP2     | ENSG00000143320.8  | 1.051644202  | 1.739922587  | 2.399704559  |
| SETD8P1    | ENSG00000279730.2  | -0.185516301 | -1.575281522 | -0.522234821 |
| RN7SL832P  | ENSG00000243819.4  | 0.913933266  | 0.482757246  | -2.147390173 |
| RGS17      | ENSG00000091844.7  | 2.176951581  | 1.293013939  | 0.431829901  |
| MIR6838    | ENSG00000283969.1  | -1.373794071 | -1.365340079 | -1.787782933 |
| RPL15P18   | ENSG00000228501.2  | 0.488117334  | -0.425816643 | -0.082981905 |
| FGF22      | ENSG00000070388.11 | -1.027288145 | -0.75338809  | -1.010160654 |
| PSD        | ENSG00000059915.16 | -1.042272618 | -0.743300608 | 1.298528031  |
| SNORD89    | ENSG00000212283.1  | -2.078834519 | 2.334377894  | 2.458408395  |
| AC007566.1 | ENSG00000244055.1  | -1.533130046 | -1.741363307 | 0.087138986  |
| SERPINF1   | ENSG00000132386.10 | 4.036617309  | -1.863649332 | 5.525737092  |
| AC092168.2 | ENSG00000232034.1  | 1.000918158  | 0.57083343   | -1.339958708 |
| ZNF75D     | ENSG00000186376.14 | 1.852149186  | 1.010203175  | 0.833499224  |
| ELFN1      | ENSG00000225968.7  | -0.839743068 | 2.011338721  | -2.304504452 |
| AC104794.2 | ENSG00000260077.1  | -1.371090949 | 1.897302404  | -0.125575226 |
| AL135905.2 | ENSG00000266680.1  | 0.101756083  | 1.806079509  | 1.402409085  |
| AC026271.2 | ENSG00000224126.2  | -0.543503826 | -1.27315914  | -1.104675621 |
| POC1B-AS1  | ENSG00000270344.2  | -1.496145641 | -1.89422882  | -2.20943538  |
| AL133355.1 | ENSG00000260461.1  | 1.006613768  | -1.365208708 | -2.01261294  |
| AC084262.1 | ENSG00000260253.1  | -1.192881131 | -0.292641899 | -0.242772514 |
| SNORA61    | ENSG00000278274.1  | -1.695476212 | -1.648296964 | -2.466626818 |
| RPSAP9     | ENSG00000234618.1  | 1.412071591  | 0.800816923  | -0.086571188 |
| ZRSR1      | ENSG00000212643.2  | -1.443283075 | 0.103484318  | -0.567079147 |
| AC109326.1 | ENSG00000279602.1  | 1.670969538  | 0.395401909  | -0.419344931 |
| AC005154.3 | ENSG00000244480.1  | -0.500303471 | 1.285003532  | 0.116903529  |
| OPRD1      | ENSG00000116329.10 | 4.192010524  | 2.664718716  | -1.845706295 |
| RNF139-AS1 | ENSG00000245149.3  | 1.236787701  | 1.27110795   | 1.121056208  |
| AC104113.1 | ENSG00000272308.1  | -0.378281281 | -0.309618077 | 0.083938734  |
| AP001527.2 | ENSG00000277459.1  | -0.014285243 | -1.44600186  | -0.873016115 |
| AC015799.1 | ENSG00000279432.1  | -1.607632678 | -2.203923445 | -1.46097593  |
| AC096536.3 | ENSG00000242396.1  | 1.798836562  | 1.780686575  | 0.745788015  |
| ARHGAP45   | ENSG00000180448.10 | 1.123048564  | 1.59322459   | 5.373454623  |
| AL671710.1 | ENSG00000273192.1  | 0.092806317  | -1.619068015 | -1.800086253 |

|             |                    |              |              |              |
|-------------|--------------------|--------------|--------------|--------------|
| AC068587.6  | ENSG00000283674.2  | -2.163662945 | 3.285384936  | 2.498166031  |
| AC084117.1  | ENSG00000256006.1  | 0.85855685   | 1.314787705  | -0.882091224 |
| AC093768.1  | ENSG00000183199.6  | -1.342847379 | -1.825024237 | -1.641746011 |
| NPIPB12     | ENSG00000169203.16 | 1.445628809  | -0.580506268 | 1.678583978  |
| AC068587.7  | ENSG00000284613.1  | -2.18563726  | 4.436135938  | -0.923385555 |
| AC016629.2  | ENSG00000269032.1  | 0.933375821  | -0.727051285 | -0.626474894 |
| AC020978.8  | ENSG00000263276.1  | -0.902651888 | -2.027601925 | -0.273334201 |
| NCAPGP1     | ENSG00000250290.1  | -0.941323285 | -2.356950878 | 2.888493918  |
| STK32A      | ENSG00000169302.14 | -1.654307093 | 3.183484022  | 5.480642572  |
| SCARNA18    | ENSG00000252139.1  | -1.701077353 | -0.085399668 | -1.998608784 |
| RPL23AP74   | ENSG00000227694.1  | 1.202717022  | -1.68830792  | -0.54738513  |
| MED12L      | ENSG00000144893.12 | 2.36602164   | 1.488427001  | -2.059200042 |
| ADAP1       | ENSG00000105963.13 | 0.560858987  | -1.354888358 | -1.606433162 |
| RPS20P21    | ENSG00000244295.2  | -2.166708567 | -1.626498412 | -1.764603895 |
| PPP1R9A     | ENSG00000158528.11 | 1.769962544  | 1.585720076  | 2.500871829  |
| AL592148.3  | ENSG00000272750.1  | 0.486632715  | -1.860864502 | -1.000569247 |
| THSD1       | ENSG00000136114.15 | -2.387039208 | 1.154217747  | 1.225835048  |
| AC006511.3  | ENSG00000279865.1  | -1.735032756 | -1.030366753 | -2.153609885 |
| DZIP1       | ENSG00000134874.17 | 5.65789084   | 4.718114604  | 3.670802933  |
| AC245595.1  | ENSG00000232527.7  | 1.03544033   | 2.140401793  | -0.538811589 |
| AC108704.2  | ENSG00000279500.1  | -0.463306837 | 0.108971294  | 2.338476459  |
| YPEL4       | ENSG00000166793.10 | 1.976518139  | 2.43474517   | 3.013945301  |
| RN7SKP16    | ENSG00000222112.1  | 2.266588046  | -0.302258213 | 1.254952061  |
| CRYM-AS1    | ENSG00000189149.12 | 0.098002734  | -0.416487838 | -0.002220327 |
| FAM186B     | ENSG00000135436.8  | -0.86367169  | -0.527847929 | -0.872207105 |
| AC104109.2  | ENSG00000270177.1  | 0.504569271  | 0.273165505  | -1.892018583 |
| PKD1P5      | ENSG00000254681.6  | -1.158394736 | 1.243185451  | 1.49102689   |
| MTND5P11    | ENSG00000248923.1  | -1.963578164 | -0.25252945  | -0.205899751 |
| MROH8       | ENSG00000101353.14 | -0.591381525 | 1.327892584  | -0.985438322 |
| MAOA        | ENSG00000189221.9  | 1.874175146  | 3.497242326  | 4.153059765  |
| uc_338      | ENSG00000277916.1  | -2.447099534 | -1.68313919  | -1.635238328 |
| CITED4      | ENSG00000179862.6  | 6.2490726    | 1.003453251  | 2.749573905  |
| AC100827.3  | ENSG00000260534.1  | -1.333236656 | -1.971911385 | -1.85984366  |
| MTSS1       | ENSG00000170873.18 | 1.061619913  | 2.325665108  | 6.878260294  |
| RPS2P55     | ENSG00000216866.5  | -0.360010073 | -1.529238808 | -1.4103701   |
| SYNJ2BP-COX | ENSG00000258644.5  | 0.056268418  | -0.587079372 | 0.856561876  |
| IDNK        | ENSG00000148057.15 | 1.955809005  | 3.077388766  | 0.893973632  |
| AF201337.1  | ENSG00000254332.1  | -1.026009273 | 0.122704407  | -1.212113355 |
| PPP5D1      | ENSG00000230510.6  | -1.690937259 | -2.258069908 | -1.150116759 |
| HMG3-AS1    | ENSG00000270362.1  | -0.230948695 | 0.177073566  | 0.22876504   |
| RASSF2      | ENSG00000101265.15 | -1.984928137 | 3.353829291  | 1.175289941  |
| MGC16275    | ENSG00000246731.2  | 0.280731426  | 3.232505349  | 1.803635017  |
| MYEF2       | ENSG00000104177.17 | 3.5826613    | 4.849590867  | 5.280095161  |
| SYTL2       | ENSG00000137501.17 | 4.063838296  | 3.366848084  | 4.627125602  |
| TNFRSF25    | ENSG00000215788.9  | 2.916107606  | 2.891374463  | 0.459661614  |
| AC024580.1  | ENSG00000279794.1  | -0.079487261 | -1.216853048 | 0.330102333  |

|            |                    |              |              |              |
|------------|--------------------|--------------|--------------|--------------|
| NEURL1B    | ENSG00000214357.8  | -1.378746864 | -1.866946852 | 2.915803258  |
| ANGPTL1    | ENSG00000116194.12 | 1.039808896  | -1.724159908 | -1.694732582 |
| AC108693.1 | ENSG00000239280.1  | -1.646742368 | -2.041008083 | -1.161127662 |
| HNRNPA1P8  | ENSG00000229251.3  | -0.85832045  | -2.248381551 | -2.368623186 |
| MAP7       | ENSG00000135525.18 | -0.274668226 | 4.939540068  | 2.371239035  |
| KRT8P33    | ENSG00000250539.1  | -0.255631617 | -0.285567494 | 0.08670535   |
| AMY2B      | ENSG00000240038.6  | -2.609179861 | 0.388074831  | -2.424367891 |
| AC087741.3 | ENSG00000279259.1  | 0.01397965   | 0.614230224  | 1.079206457  |
| ADSSL1     | ENSG00000185100.10 | 1.550106967  | 2.719899969  | -1.803124034 |
| TOMM6      | ENSG00000214736.7  | 8.098570771  | 3.047699113  | 1.43445064   |
| STPG3-AS1  | ENSG00000275549.1  | -0.181972406 | 0.529132531  | -2.088720535 |
| GNG7       | ENSG00000176533.12 | 2.934072225  | 4.276911126  | 6.243525985  |
| AL160236.1 | ENSG00000258656.1  | -1.713524394 | -2.314459966 | -1.638994527 |
| DDX50P1    | ENSG00000229816.1  | -1.834306934 | -1.547852555 | -2.127674698 |
| BX284668.5 | ENSG00000238142.1  | 2.297176782  | -2.648700731 | 0.431494939  |
| RORA-AS1   | ENSG00000245534.6  | 1.059661607  | -1.314611301 | 1.659323423  |
| AL161729.1 | ENSG00000271155.1  | 0.938378694  | 0.980881248  | -0.651092737 |
| AC145124.1 | ENSG00000255495.1  | -1.756960243 | -0.144233136 | -0.04916183  |
| LINC01285  | ENSG00000203650.8  | -0.054350512 | -0.214810105 | 0.795273261  |
| AL513497.1 | ENSG00000279443.1  | 1.684655212  | -0.270182686 | -2.63617623  |
| C9orf43    | ENSG00000157653.11 | -1.349902667 | 1.16424679   | -0.954881886 |
| ANGPTL6    | ENSG00000130812.10 | -0.533828467 | -0.203481699 | -1.492030695 |
| HOXC11     | ENSG00000123388.4  | 2.57965241   | -2.396327071 | -0.612500613 |
| MLH3       | ENSG00000119684.15 | -1.808976326 | 1.180018306  | 3.673231146  |
| AC069224.1 | ENSG00000260572.1  | -0.069502317 | -0.425209907 | 0.085673815  |
| ALDH5A1    | ENSG00000112294.12 | 2.760413778  | 1.782151769  | 4.020517422  |
| ABCG4      | ENSG00000172350.9  | -1.216012942 | 0.373527115  | -0.685255458 |
| AC008567.3 | ENSG00000278611.1  | 0.113628459  | -1.047873343 | -1.433464656 |
| NEK10      | ENSG00000163491.16 | -0.055856709 | -1.266084698 | -1.818251429 |
| AC116407.2 | ENSG00000277511.1  | 0.098329043  | 1.568494584  | 1.206423323  |
| PHKG1      | ENSG00000164776.9  | -2.331254774 | -0.098284347 | -2.366532819 |
| AL110118.2 | ENSG00000259066.5  | -1.281061762 | 1.015990683  | -0.554898007 |
| BRWD1-AS2  | ENSG00000255568.3  | -1.299945292 | 0.423559546  | -1.107508178 |
| MTX1P1     | ENSG00000236675.1  | -0.702085572 | -1.110334481 | -1.474361303 |
| EPB41L4A   | ENSG00000129595.12 | 0.747022532  | 3.277201295  | 4.586921276  |
| AC018553.1 | ENSG00000277559.1  | 2.58170689   | 1.61602431   | 2.593901975  |
| NTAN1P2    | ENSG00000250569.1  | -0.435875469 | -1.112570971 | -0.760738542 |
| NAT8L      | ENSG00000185818.7  | 4.126354467  | 2.720796437  | 7.405148961  |
| AC027290.2 | ENSG00000280138.1  | -1.73454161  | -0.620214148 | -0.15454834  |
| PIN4P1     | ENSG00000227973.1  | -2.045595052 | -0.411926146 | -0.482689078 |
| CCDC150P1  | ENSG00000256304.1  | 0.373504329  | -0.641885298 | -1.11827232  |
| PRSS27     | ENSG00000172382.9  | 0.190024106  | -0.184390407 | -0.91785673  |
| AC106785.4 | ENSG00000261620.1  | 0.775762775  | -1.334935684 | -2.354583113 |
| AC087392.3 | ENSG00000262228.2  | -1.420174923 | -2.13309243  | 0.38732603   |
| HSPA6      | ENSG00000173110.7  | 0.855922546  | 2.183070308  | 0.95847415   |
| AGGF1P1    | ENSG00000214273.4  | -2.224760976 | -2.299277154 | -0.440272879 |

|             |                    |              |              |              |
|-------------|--------------------|--------------|--------------|--------------|
| ANKRD30B    | ENSG00000180777.13 | -2.27529355  | 2.693638628  | 4.247313577  |
| AL109811.2  | ENSG00000230337.1  | 1.275104277  | 0.558546829  | -0.658718987 |
| OSBP2       | ENSG00000184792.15 | 2.002914141  | -0.667694115 | 3.134324147  |
| PRRG2       | ENSG00000126460.10 | 1.389100112  | 0.808823475  | -1.286088471 |
| F12         | ENSG00000131187.9  | 2.255153461  | 2.213033928  | 2.466838828  |
| MAP4K1      | ENSG00000104814.12 | 0.185673852  | 0.038159323  | -1.056631928 |
| COL11A2     | ENSG00000204248.10 | 2.558283597  | 1.249355709  | 4.289515223  |
| AP001273.1  | ENSG00000279696.1  | 0.15370734   | -2.337570196 | -1.347475586 |
| RPL4P5      | ENSG00000230207.1  | -0.967281079 | -1.094586728 | -0.775698616 |
| AC000120.1  | ENSG00000243107.1  | -1.895636407 | -1.843736843 | -0.807320658 |
| F2RL1       | ENSG00000164251.4  | 2.313578567  | 0.663421626  | -1.55980072  |
| AC092329.4  | ENSG00000284428.1  | 3.968580541  | 2.399853898  | 1.148129529  |
| CEL         | ENSG00000170835.14 | -1.649099681 | -0.53946724  | -1.472449264 |
| HIST2H2BF   | ENSG00000203814.6  | 1.174145085  | 1.922414346  | -1.89528889  |
| C1RL        | ENSG00000139178.10 | 3.581599165  | -0.363696108 | 2.468955051  |
| AKAP5       | ENSG00000179841.8  | -0.345650481 | -1.574188103 | -0.607441747 |
| STOX1       | ENSG00000165730.14 | -2.180407537 | -1.97450275  | 0.352314451  |
| ZNF790-AS1  | ENSG00000267254.5  | 2.565817732  | 2.857666991  | -1.150056775 |
| RN7SL689P   | ENSG00000263432.2  | 2.024076134  | -0.335925033 | -0.998425703 |
| AL160314.2  | ENSG00000258458.5  | -1.017195981 | -0.848923826 | -1.313189337 |
| QRICH2      | ENSG00000129646.14 | -1.849285064 | 1.062567744  | -1.618053302 |
| IMPDH1P8    | ENSG00000224728.1  | 0.491410862  | 0.771838513  | -0.328171317 |
| AC002558.1  | ENSG00000239291.1  | -1.721610462 | -0.514721969 | -1.473878101 |
| AL845472.1  | ENSG00000279561.2  | -0.234590822 | -0.823436231 | -0.509924605 |
| LINC01198   | ENSG00000231817.7  | 3.325171034  | 4.919493129  | 1.840052163  |
| ST3GAL5-AS1 | ENSG00000232504.4  | -0.087138915 | 0.379608473  | -0.113777826 |
| CDS1        | ENSG00000163624.5  | 0.846675236  | 2.293875337  | 3.009011082  |
| GUSBP2      | ENSG00000241549.8  | -1.93738192  | -1.548394193 | 0.979094644  |
| PCDHB10     | ENSG00000120324.8  | 1.40602563   | -2.216803282 | 1.770328455  |
| PLCE1       | ENSG00000138193.15 | 1.601645671  | -2.158817182 | -0.455493363 |
| AC012557.1  | ENSG00000271843.1  | -0.425521233 | -0.106835933 | -2.606175322 |
| SNORD27     | ENSG00000275996.1  | 2.404277853  | 1.747625186  | -1.009933114 |
| GFI1        | ENSG00000162676.11 | 0.332062929  | -1.970923899 | 2.953833586  |
| RHEBP2      | ENSG00000226964.1  | -1.054230263 | -0.56377354  | -0.254156822 |
| AL359921.2  | ENSG00000273058.2  | 1.232126975  | -0.241944441 | -0.280449981 |
| UPF3AP3     | ENSG00000234709.2  | -2.030235954 | 0.706139043  | -0.360829154 |
| MIR100HG    | ENSG00000255248.7  | 5.218720329  | -0.389902685 | 0.070715032  |
| RPL7AP30    | ENSG00000241741.1  | 0.54216288   | 0.262887654  | -2.093304034 |
| ADAMTS1     | ENSG00000154734.14 | 2.670701392  | 4.649135373  | 1.891992825  |
| AL162586.1  | ENSG00000225032.5  | 0.196517025  | 1.218475992  | 0.204177139  |
| AC010973.2  | ENSG00000244151.1  | 0.154758446  | 0.337256088  | -2.000487392 |
| AC009090.1  | ENSG00000260038.1  | -1.387189242 | -1.647513324 | 0.364669058  |
| KCNQ1OT1    | ENSG00000269821.1  | -1.490651455 | -0.58216248  | -2.623339301 |
| AL031587.6  | ENSG00000279010.3  | -0.210606901 | 0.035155199  | -0.003535722 |
| LINC01126   | ENSG00000279873.2  | -0.000463765 | -0.333651927 | -0.588637745 |
| FLJ37035    | ENSG00000224023.10 | -0.090709168 | -1.664430714 | -0.265228468 |



|            |                    |              |              |              |
|------------|--------------------|--------------|--------------|--------------|
| ST13P6     | ENSG00000225259.4  | -1.569090923 | -2.186644564 | -1.438348185 |
| FP565324.1 | ENSG00000283199.1  | 1.493768934  | 0.548787615  | -1.26767493  |
| CTBP2P8    | ENSG00000234383.1  | -1.266706321 | -1.183070376 | -1.835596835 |
| RARRES3    | ENSG00000133321.10 | -0.620642761 | -1.999228079 | -0.305518428 |
| WWTR1-IT1  | ENSG00000241985.1  | 0.844670848  | -0.281292674 | 0.415821466  |
| AC078820.1 | ENSG00000258088.1  | 3.333054903  | -2.170195133 | 4.416245595  |
| AC010200.1 | ENSG00000257803.2  | -2.19470099  | -0.621058142 | -0.005535461 |
| VANGL2     | ENSG00000162738.5  | 1.522803552  | 5.030713014  | 4.244342267  |
| ZNF573     | ENSG00000189144.13 | 3.17528785   | 2.298935862  | 2.297140649  |
| RARA-AS1   | ENSG00000265666.1  | 1.79209698   | 0.699519978  | 1.715341698  |
| AC008429.1 | ENSG00000204758.7  | -1.640282622 | 0.562767791  | -0.419910125 |
| AC009133.1 | ENSG00000238045.9  | 0.698012645  | -1.955746328 | 0.031003443  |
| RDH5       | ENSG00000135437.9  | 2.349472921  | 1.085632635  | -0.29060004  |
| AL118558.4 | ENSG00000272444.1  | -0.763457787 | 0.222364525  | -2.270160068 |
| ASAH2      | ENSG00000188611.14 | -0.897449473 | -1.559401612 | -1.317086488 |
| RNA5SP392  | ENSG00000252714.1  | -1.352708781 | -1.453200397 | -2.239996532 |
| HOTAIRM1_1 | ENSG00000276528.1  | -1.644537535 | -1.350496649 | -1.520339289 |
| RNU6-513P  | ENSG00000251913.1  | -2.248776739 | -2.253909867 | -1.591241799 |
| AL592158.1 | ENSG00000281969.1  | -1.205231192 | 0.145640011  | 0.284931929  |
| DNM1       | ENSG00000106976.20 | 6.309208568  | 2.902578514  | 1.12453019   |
| CCDC110    | ENSG00000168491.9  | -2.46478557  | 1.884987451  | -0.028001101 |
| AL589765.4 | ENSG00000249602.1  | -1.090712252 | 1.330041785  | 1.784292565  |
| AC007336.1 | ENSG00000261997.1  | -0.756058111 | -2.067194891 | -2.096992081 |
| RPS15AP10  | ENSG00000225447.1  | -0.450524425 | -0.93529143  | -1.059662546 |
| AC126118.1 | ENSG00000271993.1  | -0.872811801 | -1.017884917 | -1.587380196 |
| AL450384.2 | ENSG00000240291.1  | 0.898744642  | 0.259496309  | -0.590030458 |
| SORL1      | ENSG00000137642.12 | -0.054819559 | 3.951949651  | 4.608191841  |
| AC013474.1 | ENSG00000235128.1  | -1.70987696  | 1.975418919  | 1.980850785  |
| AC068790.2 | ENSG00000269938.1  | 0.206006473  | -0.128189568 | 0.843203995  |
| MIR3940    | ENSG00000284159.1  | -0.447256314 | 0.243227717  | -0.91578638  |
| GMPS1      | ENSG00000250471.2  | -1.298984844 | -1.31778206  | -1.355612542 |
| DLX4       | ENSG00000108813.10 | 0.86428632   | 1.947108655  | 0.020312802  |
| AL445228.2 | ENSG00000271387.1  | -1.106907178 | -0.040203594 | -0.276531695 |
| LINC01816  | ENSG00000231327.1  | 1.331249438  | 1.627102739  | -2.363015336 |
| TMEM255A   | ENSG00000125355.15 | 3.607129279  | 5.314070951  | 4.116790506  |
| RPL23AP32  | ENSG00000237887.1  | -1.245413622 | -0.873571463 | -0.612110405 |
| AL121612.1 | ENSG00000240914.1  | -0.756723876 | -1.652106959 | -2.050292929 |
| AL954705.1 | ENSG00000231181.1  | -2.137019526 | 0.158035864  | -0.730943459 |
| AP001347.1 | ENSG00000224905.6  | -0.515136959 | -0.199194594 | -2.185371955 |
| AL136531.1 | ENSG00000229728.1  | -0.931815314 | -1.327703225 | -0.648064169 |
| AC018754.1 | ENSG00000272367.1  | 0.787503538  | 0.262082071  | -0.184774472 |
| TAS2R5     | ENSG00000127366.5  | -0.079292562 | 1.287532845  | -1.307696801 |
| AC090970.3 | ENSG00000274528.1  | 1.779259874  | -0.68820165  | -0.974441359 |
| ZNF878     | ENSG00000257446.3  | 1.274686088  | -1.693048631 | -0.182887209 |
| AC005618.1 | ENSG00000272070.1  | 0.248555411  | -2.434098288 | -0.84199241  |
| SNORD43    | ENSG00000263764.1  | 1.691571911  | -1.157102823 | -0.809875392 |

|             |                    |              |              |              |
|-------------|--------------------|--------------|--------------|--------------|
| AL080250.1  | ENSG00000225793.2  | 1.237808501  | -0.247042428 | -0.815662367 |
| AC073130.3  | ENSG00000279086.1  | -2.02291385  | -2.340126796 | 0.086469228  |
| MIR2277     | ENSG00000284336.1  | -1.947309398 | -1.745014151 | 0.524687903  |
| AL136164.4  | ENSG00000279312.1  | 0.447803457  | -0.139095438 | -2.346989474 |
| GAPDHP33    | ENSG00000240244.3  | 0.380848456  | -1.648352711 | -0.289414782 |
| AC022784.8  | ENSG00000279949.1  | -2.340152209 | -0.184498716 | 0.126009664  |
| AP003356.1  | ENSG00000253669.3  | 0.837511904  | -2.493098761 | -0.341199551 |
| TMEM88      | ENSG00000167874.6  | 0.698771059  | 0.264577403  | -0.621411678 |
| SPATA3-AS1  | ENSG00000238062.5  | -1.528794201 | -0.690924524 | -0.993956453 |
| TNFSF13B    | ENSG00000102524.11 | -1.025128255 | 2.163903995  | 0.977053301  |
| SLFNL1-AS1  | ENSG00000281207.1  | -0.150093793 | -1.129635458 | -2.11781842  |
| FP236383.1  | ENSG00000280441.2  | -0.265949666 | -1.035645785 | -2.100653685 |
| AC024257.3  | ENSG00000269514.1  | -1.605384161 | -1.504860479 | -1.493013303 |
| SLX1A-SULT1 | ENSG00000213599.10 | -1.395076019 | -1.904081004 | -1.252492827 |
| SLC10A5     | ENSG00000253598.1  | -1.159390268 | -1.608284261 | -0.65879119  |
| ARAP2       | ENSG00000047365.11 | 2.352953999  | 1.889647676  | 4.383412694  |
| AC022075.1  | ENSG00000245648.1  | 0.640231123  | 0.53016221   | 1.59611847   |
| PNPLA7      | ENSG00000130653.15 | 1.602577477  | 1.451592055  | 0.192973316  |
| SMG1P6      | ENSG00000254634.4  | -1.229011393 | -2.1139173   | -0.711190468 |
| AC087276.1  | ENSG00000254463.1  | 0.230576825  | -0.771207764 | 0.050211933  |
| AC008735.1  | ENSG00000267096.1  | 0.427322614  | -1.788735761 | -0.144295933 |
| RPL24P2     | ENSG00000235065.1  | 0.913341038  | 0.233309096  | -0.089423876 |
| SRRM2-AS1   | ENSG00000205913.6  | 0.930387851  | 0.664265436  | -1.21959481  |
| DKK3        | ENSG00000050165.17 | 2.967056425  | -0.426171776 | 7.019554252  |
| PHGDH       | ENSG00000092621.12 | 7.533765562  | 7.212133135  | 7.408474133  |
| PCDHB3      | ENSG00000113205.5  | 1.332204668  | 1.093132263  | 0.650675491  |
| AC015726.1  | ENSG00000270091.1  | 1.041969625  | -2.162524137 | -0.986362426 |
| AC008569.2  | ENSG00000267474.1  | -0.64610882  | -0.722268447 | -0.617330314 |
| GBX2        | ENSG00000168505.6  | -0.07683763  | 1.928223781  | 3.662451627  |
| C1QTNF12    | ENSG00000184163.3  | 1.002871514  | 0.685152551  | -0.704894938 |
| DKK1        | ENSG00000107984.9  | 4.49212805   | 1.607338959  | -1.951805229 |
| DENND6B     | ENSG00000205593.11 | -0.937964219 | -0.875253786 | 0.36638938   |
| PI15        | ENSG00000137558.7  | 3.930784993  | 4.301153666  | 3.730110355  |
| TSPAN7      | ENSG00000156298.12 | -1.271642238 | 1.668632315  | 6.07464316   |
| AC069307.1  | ENSG00000269949.1  | 1.188395399  | -0.793162126 | -1.753766236 |
| FERMT3      | ENSG00000149781.12 | -1.562638934 | -0.015750417 | -1.822629137 |
| LINC01125   | ENSG00000228486.10 | 1.676377439  | 0.013033495  | -2.578744993 |
| LRRN4CL     | ENSG00000177363.4  | -2.311993231 | -1.518787457 | 3.762674587  |
| RNA5SP424   | ENSG00000212290.1  | -2.053843396 | -2.26749349  | -1.944274436 |
| AC008014.1  | ENSG00000257261.5  | -1.224632315 | 0.208528879  | 1.036596952  |
| RPL4P6      | ENSG00000230071.2  | -1.080504896 | -1.24687184  | -1.209719953 |
| VN1R82P     | ENSG00000268995.1  | -1.730951279 | -1.93362076  | -2.457216796 |
| ADAMTS3     | ENSG00000156140.9  | 2.488762499  | 1.23057451   | 1.45887839   |
| mascrNA-me  | ENSG00000274072.1  | -1.757899232 | -2.377099805 | -2.098762498 |
| AP001469.2  | ENSG00000228137.1  | -0.793748652 | 0.04040699   | -1.060908878 |
| AARD        | ENSG00000205002.3  | 2.336426829  | 0.149987547  | -2.399407222 |

|            |                    |              |              |              |
|------------|--------------------|--------------|--------------|--------------|
| SLC6A17    | ENSG00000197106.6  | -2.566668442 | 5.318453818  | 6.666560866  |
| KIF27      | ENSG00000165115.14 | 1.195314891  | 1.596316929  | 0.613369686  |
| AC046143.1 | ENSG00000229334.1  | 0.595379246  | -0.580254219 | -1.54332804  |
| AC122718.1 | ENSG00000250461.1  | -0.353850843 | 0.015198594  | -1.199054289 |
| AL078621.1 | ENSG00000144158.4  | 0.114601878  | -0.021899565 | -2.539104812 |
| CRYAB      | ENSG00000109846.7  | 2.317441759  | 3.546973894  | 0.435759427  |
| PIGZ       | ENSG00000119227.7  | -1.393175697 | 1.947892703  | -2.282760766 |
| LINC01176  | ENSG00000281404.1  | -1.314655159 | 0.89618082   | -0.898261989 |
| AL133461.1 | ENSG00000282413.1  | 2.034755652  | -1.607088516 | 0.908580283  |
| HIST1H2BG  | ENSG00000273802.2  | 1.028426795  | 1.545531908  | -0.618291563 |
| AL451050.2 | ENSG00000272205.1  | 1.040136923  | -1.207874268 | -0.969898809 |
| AC099568.2 | ENSG00000272931.1  | -0.325777976 | 0.20895747   | 1.567582203  |
| PLA2G12AP1 | ENSG00000224680.4  | -0.67724001  | -1.569506531 | -0.700927708 |
| RABGEF1    | ENSG00000284461.1  | 1.640334026  | 3.105567591  | 0.507063827  |
| SNORD60    | ENSG00000206630.1  | 0.425062089  | -1.205995555 | -2.074103536 |
| TMEM9B-AS1 | ENSG00000254860.5  | 0.486216688  | 2.064639268  | 1.8658379    |
| RPL12P12   | ENSG00000236992.2  | 0.055461312  | -0.00918077  | -1.3748698   |
| KIAA1456   | ENSG00000250305.8  | -2.409122565 | 3.150434936  | 3.329257993  |
| RPLP0P2    | ENSG00000243742.5  | -2.42612188  | 1.450520723  | 1.874186368  |
| RNU1-103P  | ENSG00000252311.1  | -1.460365175 | 0.501536668  | 0.895029557  |
| AF129408.1 | ENSG00000272991.1  | -1.502939641 | -0.660726855 | -1.19864519  |
| CDK20      | ENSG00000156345.17 | 2.759835471  | 3.05134743   | 1.905738421  |
| SLC23A3    | ENSG00000213901.10 | -1.307291145 | 0.80000572   | 1.811233785  |
| AC006213.1 | ENSG00000266921.1  | -1.246409655 | -2.47082551  | -1.085591126 |
| RIMS3      | ENSG00000117016.9  | -1.819679438 | 0.017354143  | 3.014454708  |
| AC130650.2 | ENSG00000276564.1  | -1.287358266 | -0.542904579 | -0.059565904 |
| AC010980.2 | ENSG00000267034.1  | -2.356265914 | 0.389971836  | -0.601167388 |
| AC009269.5 | ENSG00000259744.1  | -0.49784156  | -1.346335792 | 0.2089658    |
| AC025283.2 | ENSG00000262621.4  | -0.421527764 | 0.529926777  | 0.815879314  |
| SPOCD1     | ENSG00000134668.12 | 3.647214411  | 2.395367141  | -2.315578932 |
| DTX2P1     | ENSG00000186704.9  | -2.464618945 | 0.58096934   | 0.879101572  |
| MIR3656    | ENSG00000283704.1  | -1.872713281 | -2.665181372 | -2.749809887 |
| KRT18P5    | ENSG00000236670.1  | -1.200908145 | -0.172179919 | 1.891187105  |
| AC074212.1 | ENSG00000259605.3  | 0.203648932  | -0.052071079 | -1.559404358 |
| HNRNPA3P12 | ENSG00000219102.3  | -1.609393956 | -1.31035582  | -1.879399699 |
| NACAD      | ENSG00000136274.8  | 0.07157132   | 1.684734574  | 1.492360549  |
| EGR2       | ENSG00000122877.15 | -0.906823857 | 2.426819543  | 2.424757101  |
| AL513477.1 | ENSG00000269896.2  | 1.38628984   | 1.858479157  | -2.329288471 |
| RPS20P14   | ENSG00000223803.1  | 0.143802302  | -2.083159334 | -0.98958542  |
| AC073912.2 | ENSG00000256299.1  | -1.646486245 | -0.491920841 | 1.723189405  |
| EIF1AXP1   | ENSG00000236698.1  | 1.901088796  | -1.708877616 | -1.529052917 |
| AC025287.2 | ENSG00000276408.1  | 0.98390706   | -1.5376867   | 0.072866414  |
| AC040160.1 | ENSG00000262691.1  | 0.933948274  | -0.684682514 | 0.022412372  |
| AC016876.3 | ENSG00000276384.1  | 1.181048056  | -1.102452012 | -0.137611194 |
| RUNDC3B    | ENSG00000105784.15 | -0.185648337 | 0.297024892  | 1.033949326  |
| AL451074.2 | ENSG00000224358.1  | 0.290072561  | -0.08517854  | -1.946469506 |

|            |                    |              |              |              |
|------------|--------------------|--------------|--------------|--------------|
| SND1-IT1   | ENSG00000279078.1  | -2.143935152 | 0.557684877  | -0.847985968 |
| AC012651.1 | ENSG00000258461.5  | -2.085497325 | 0.552071318  | 0.879629623  |
| AC006463.2 | ENSG00000235459.5  | -0.592169486 | -0.603166321 | -1.836625525 |
| C18orf65   | ENSG00000275763.3  | 0.259631284  | 1.625042694  | 1.055628128  |
| ACTBP7     | ENSG00000185607.5  | 0.16108104   | 1.053045156  | 1.365278101  |
| RPA4       | ENSG00000204086.4  | -0.766244559 | 0.150699875  | -0.118856138 |
| CYP27C1    | ENSG00000186684.12 | 2.291070687  | -2.723125268 | -1.246409534 |
| AL133325.3 | ENSG00000278041.1  | 0.059018283  | 1.869658457  | -1.384004534 |
| AC090616.7 | ENSG00000278867.1  | -1.636208854 | -1.297305873 | -0.23896306  |
| SCARNA17   | ENSG00000251992.1  | -0.403719158 | 3.341387483  | 2.710969728  |
| HSPD1P11   | ENSG00000251348.1  | -2.191577697 | -2.106246517 | -0.258310859 |
| SNORA17B   | ENSG00000276161.1  | 2.954903378  | 3.027693197  | 2.05204592   |
| RHOA-IT1   | ENSG00000235908.1  | -1.600519556 | -1.430250543 | -2.040422192 |
| PLLP       | ENSG00000102934.9  | 0.021263269  | -0.259788345 | -2.260103507 |
| LINC01465  | ENSG00000221949.5  | -0.754321216 | 0.085656118  | -2.356488824 |
| HIST3H2BB  | ENSG00000196890.4  | 0.532104305  | -0.634511856 | -3.08632407  |
| LAT2       | ENSG00000086730.16 | 0.7980532    | 1.2611402    | 2.463833259  |
| MIR4800    | ENSG00000284276.1  | -1.396730532 | -1.508286895 | -1.54322875  |
| NDUFA6-AS1 | ENSG00000237037.9  | -0.032168936 | -0.246753037 | 0.852165536  |
| POU4F1     | ENSG00000152192.7  | -0.899597495 | 1.821809494  | 4.498466106  |
| AL139289.2 | ENSG00000234694.1  | 1.271769234  | 0.78087476   | -0.563883431 |
| SNORD118   | ENSG00000200463.1  | -1.61807638  | -2.218061177 | -2.843754012 |
| AL049844.1 | ENSG00000257065.1  | -0.52168584  | -0.942962301 | 0.71399028   |
| AC010536.1 | ENSG00000226180.3  | 0.498811555  | -0.078914783 | -1.108848827 |
| GGTA2P     | ENSG00000237766.2  | -1.303930823 | -0.937419847 | -1.30444022  |
| LRRIQ3     | ENSG00000162620.15 | 0.373632216  | 0.05026041   | 0.013802903  |
| ADAM1A     | ENSG00000229186.4  | -1.944263605 | -1.22284079  | -1.617633658 |
| UNC13D     | ENSG00000092929.11 | -1.557110355 | -0.500396633 | 1.242559451  |
| AMH        | ENSG00000104899.7  | 3.135749691  | -1.820272722 | 2.127832318  |
| ZNF665     | ENSG00000197497.10 | 0.624166296  | -1.161861622 | 0.252676899  |
| AC132872.2 | ENSG00000264548.1  | -0.96837467  | -0.600693526 | -2.033134766 |
| WHAMMP3    | ENSG00000276141.4  | 0.438468133  | 0.797548433  | 1.999633928  |
| SNORD5     | ENSG00000239195.1  | -0.465953567 | -2.614728756 | -2.01312013  |
| AC024451.4 | ENSG00000269924.1  | -0.598063343 | -1.330874363 | -1.355373782 |
| RND1       | ENSG00000172602.9  | 0.114321325  | -0.611666393 | 0.33567308   |
| ASIC3      | ENSG00000213199.7  | 1.916394747  | 2.401096284  | -1.835033846 |
| SNORA5B    | ENSG00000200656.1  | -2.806225636 | -1.926168115 | -1.902787244 |
| AL049796.1 | ENSG00000260464.1  | -0.478693532 | -2.687821687 | -1.39350141  |
| SLC35E1P1  | ENSG00000238286.1  | -1.284401216 | -0.506567723 | 1.28213829   |
| FTH1P20    | ENSG00000226564.1  | -0.616051849 | -1.322798934 | -0.369098109 |
| AL022068.1 | ENSG00000228412.7  | -2.217574589 | -0.271626524 | 0.040240507  |
| AC020978.2 | ENSG00000259797.1  | -1.923855607 | -1.363532928 | -0.46872587  |
| ACVR1C     | ENSG00000123612.15 | -1.349423416 | 1.717751337  | 1.763683807  |
| AL078644.1 | ENSG00000273004.1  | 0.760575859  | 0.865161108  | -0.470929064 |
| SORD2P     | ENSG00000259479.6  | -1.997184943 | -0.879967562 | -1.571583306 |
| DNAH7      | ENSG00000118997.13 | -1.114272221 | -0.178117225 | 1.471166857  |

|            |                    |              |              |              |
|------------|--------------------|--------------|--------------|--------------|
| PCDHGA3    | ENSG00000254245.2  | 0.638594429  | -0.021372286 | -1.951395303 |
| RGMB-AS1   | ENSG00000246763.6  | 0.618149278  | -0.251198464 | -0.42539771  |
| KIAA1644   | ENSG00000138944.7  | 3.377175806  | -0.412115041 | 1.311738505  |
| AL117694.1 | ENSG00000258967.1  | -1.911989711 | -1.928683254 | -1.614898969 |
| MIR4658    | ENSG00000284518.1  | -0.273822988 | 0.690674093  | -1.003701419 |
| AL137060.1 | ENSG00000274270.1  | -1.801360784 | -0.616556878 | -0.49561304  |
| AL133330.1 | ENSG00000251194.2  | 0.447710148  | -0.858871313 | 0.408911494  |
| AL583839.1 | ENSG00000227603.1  | 0.031849406  | -0.97301993  | -1.983073641 |
| NDRG4      | ENSG00000103034.14 | 3.314430911  | 4.385154834  | 1.379602411  |
| SNORA17    | ENSG00000281808.1  | -0.258075065 | -2.18514829  | -2.679345217 |
| NKD1       | ENSG00000140807.6  | -0.940997093 | -2.675297522 | 4.345760277  |
| IGDCC4     | ENSG00000103742.11 | -0.634062757 | 3.215265548  | 0.401375664  |
| RN7SL130P  | ENSG00000244256.3  | -0.351458245 | 0.29344892   | 1.050002648  |
| AP003086.1 | ENSG00000251323.2  | -2.028950927 | -0.116875371 | -0.081762572 |
| AC022400.6 | ENSG00000272916.5  | -1.567669809 | -1.545296936 | -1.189876894 |
| PGAM1P8    | ENSG00000255200.1  | -2.085527307 | -1.337884398 | 0.188995719  |
| AC007068.1 | ENSG00000213443.2  | -1.146082616 | -1.239463541 | -1.767152569 |
| PSD4       | ENSG00000125637.15 | 1.930256377  | -1.771558831 | 0.59259851   |
| OVCH1-AS1  | ENSG00000257599.2  | -2.485878346 | -2.730188566 | -2.512308637 |
| FXVD6      | ENSG00000137726.16 | 1.616308088  | 4.159301628  | -1.092803456 |
| AC074033.1 | ENSG00000213178.3  | -1.516165025 | -0.738705415 | -0.923890729 |
| CELSR1     | ENSG00000075275.16 | 4.145154421  | 5.572113002  | 4.72598984   |
| MTRNR2L8   | ENSG00000255823.4  | -2.621767095 | -0.909295334 | 0.376681771  |
| AC067852.6 | ENSG00000267632.1  | -0.514240804 | -0.049185908 | 1.854547186  |
| NOTCH3     | ENSG00000074181.8  | 1.75022534   | 6.037040311  | -2.94352096  |
| PANO1      | ENSG00000274897.2  | -0.441678801 | 0.449820888  | -2.532142523 |
| AC015909.5 | ENSG00000279792.1  | -1.703258676 | -1.666926564 | -1.259191936 |
| SNORA81    | ENSG00000238390.1  | -1.285464904 | 0.172108987  | 0.238920713  |
| GPX1       | ENSG00000233276.3  | 8.079464716  | 8.622443892  | 8.696591913  |
| EGF        | ENSG00000138798.11 | 1.465906247  | -0.848410415 | 3.617521134  |
| KCNAB1     | ENSG00000169282.17 | -2.579927928 | 2.197946281  | 1.775069685  |
| CYBA       | ENSG00000051523.10 | 6.875393673  | 8.001929188  | 5.344462524  |
| AC114495.2 | ENSG00000229447.2  | 0.077288225  | -0.314785466 | -0.055357332 |
| AC004156.1 | ENSG00000267666.2  | -1.259244791 | 0.448133118  | -2.626924476 |
| MUSTN1     | ENSG00000272573.5  | -0.581156672 | 0.613554864  | -1.002233536 |
| AC121761.2 | ENSG00000273987.1  | -1.789911307 | 0.803765469  | 1.497773505  |
| AC079447.1 | ENSG00000241962.9  | -0.918595761 | 1.081350873  | -1.347795055 |
| ALDH1A2    | ENSG00000128918.14 | -1.767344956 | 3.300787891  | 2.202876459  |
| AC145285.2 | ENSG00000251417.2  | -2.998818291 | -0.194234019 | -1.294199324 |
| AP000786.1 | ENSG00000255893.1  | 1.412544874  | 0.493508064  | 1.610068631  |
| AC099668.1 | ENSG00000259970.1  | -2.126419485 | -1.169970826 | -2.17278781  |
| AL132780.4 | ENSG00000279656.1  | -2.433336036 | 0.181122917  | -2.717734558 |
| AC009336.2 | ENSG00000278500.1  | -1.403030249 | -0.968559128 | 0.900861779  |
| VN1R83P    | ENSG00000268521.1  | 1.931311444  | 1.491906698  | 1.216399183  |
| AL732292.2 | ENSG00000273416.1  | -1.778655346 | -1.448808178 | -2.399411771 |
| SPEF1      | ENSG00000101222.12 | -1.065577095 | -1.336526825 | -2.92458899  |

|            |                    |              |              |              |
|------------|--------------------|--------------|--------------|--------------|
| HOTAIRM1_3 | ENSG00000274864.1  | -0.963241932 | 1.569297811  | 1.368389864  |
| CIAPIN1P   | ENSG00000263846.1  | -0.496864202 | -1.75586673  | -1.178293884 |
| AC079949.2 | ENSG00000278266.1  | 3.085546745  | 1.53361526   | -0.830414948 |
| AC107983.2 | ENSG00000273018.5  | 2.436272576  | -2.391183101 | 1.489584138  |
| PCSK4      | ENSG00000115257.15 | -1.804247695 | 1.992123069  | 1.960999088  |
| LINC00921  | ENSG00000281005.1  | -1.066445106 | -1.223312345 | -1.142750829 |
| AL138976.2 | ENSG00000259775.1  | -1.131371598 | 1.063051245  | -0.121142696 |
| GATM       | ENSG00000171766.15 | -1.559451443 | 2.943971532  | 3.183178704  |
| LINC00926  | ENSG00000247982.6  | -1.119810184 | 0.026141545  | -2.188319077 |
| AC010331.1 | ENSG00000277383.1  | 0.151686783  | -0.447022907 | -1.063405871 |
| TMEM265    | ENSG00000281991.1  | -1.065714943 | -1.311975122 | -1.397510164 |
| ZNF883     | ENSG00000228623.5  | 3.799290615  | 2.669509137  | -2.146603203 |
| AC016590.3 | ENSG00000276846.1  | -1.996918328 | -1.05509238  | -2.178151665 |
| ZNF582-AS1 | ENSG00000267454.5  | -0.087651823 | 0.531776355  | 0.394336366  |
| PCDH9      | ENSG00000184226.14 | 1.256348     | -3.137831478 | -1.142715535 |
| LMCD1-AS1  | ENSG00000227110.6  | 0.582608694  | 1.05448084   | 0.324541831  |
| VPS9D1-AS1 | ENSG00000261373.1  | 4.045758575  | 4.498799011  | -2.71425531  |
| GOLGA6L10  | ENSG00000278662.4  | -0.309196618 | 0.106083678  | 2.028013794  |
| AC087294.1 | ENSG00000235530.6  | -0.730538435 | -0.892424872 | -1.090313051 |
| AP000692.2 | ENSG00000273199.1  | 0.201726439  | -1.335571856 | -2.822373996 |
| AL162171.1 | ENSG00000258789.1  | 0.624053763  | 0.045349108  | -0.971267306 |
| EIF4BP6    | ENSG00000197258.5  | -0.220413506 | -1.297373248 | -0.408864229 |
| SPON2      | ENSG00000159674.11 | 6.424378056  | 5.712204109  | 6.659414095  |
| NPAS3      | ENSG00000151322.18 | -0.779020858 | -1.395075565 | 0.982431675  |
| AC016027.1 | ENSG00000225335.3  | -0.448422263 | -1.750594026 | 0.705039834  |
| PALM       | ENSG00000099864.17 | 1.501750783  | 4.624378831  | 0.301189546  |
| AC106820.2 | ENSG00000259895.1  | -0.399169317 | -0.458120895 | -1.297017242 |
| AC087893.1 | ENSG00000274598.1  | -0.356270142 | -0.360854957 | -0.182319849 |
| AL021878.2 | ENSG00000270083.1  | -0.529606068 | 2.214348299  | 0.88589671   |
| CORO2B     | ENSG00000103647.12 | 4.015605514  | 0.106859183  | 4.029313971  |
| Z93930.2   | ENSG00000226471.6  | -1.46741433  | 1.423751001  | 1.645250891  |
| GSTM3      | ENSG00000134202.10 | 3.650221261  | 4.670798949  | 1.608382938  |
| RPSAP26    | ENSG00000242735.1  | -0.09279074  | -1.312361861 | -0.502943954 |
| MNX1       | ENSG00000130675.14 | 2.296295052  | -2.397173284 | 2.675185576  |
| FBXO24     | ENSG00000106336.12 | -0.861849296 | -1.272609904 | -2.266477237 |
| DAPK2      | ENSG00000035664.11 | -1.934713037 | -1.679401228 | -2.223469097 |
| ZMYND10    | ENSG00000004838.13 | 0.56036969   | -2.126362609 | -2.298512586 |
| PHEX       | ENSG00000102174.8  | 1.987250897  | -2.689329134 | -1.158697396 |
| AC007014.2 | ENSG00000274038.1  | -1.453397705 | -1.189894901 | -0.906305444 |
| RPS2P7     | ENSG00000235508.3  | 0.056802736  | -1.218868906 | -1.862756281 |
| PRELP      | ENSG00000188783.5  | -0.560443962 | -0.295329827 | -1.979666687 |
| SMN2       | ENSG00000205571.13 | 4.352057364  | 0.18097789   | 2.366793367  |
| ITGA9      | ENSG00000144668.11 | 4.400968168  | 5.16323646   | 3.34642159   |
| LINC02175  | ENSG00000262155.1  | -2.941221773 | -0.863181394 | -1.988486705 |
| ITGA10     | ENSG00000143127.12 | 2.88311767   | 0.243332494  | 6.416842199  |
| C1orf226   | ENSG00000239887.4  | 3.408493394  | 2.686980453  | 1.494448259  |

|            |                    |              |              |              |
|------------|--------------------|--------------|--------------|--------------|
| AC009041.2 | ENSG00000260807.6  | 1.60217199   | 2.147969414  | 3.650376613  |
| PLEKHG4    | ENSG00000196155.12 | 4.292913299  | 3.44217422   | 4.978787188  |
| SMKR1      | ENSG00000240204.2  | 1.344007504  | 2.421563316  | 1.704678073  |
| AC084876.2 | ENSG00000280426.1  | 0.338278831  | -0.390937893 | -2.693911839 |
| AL596325.2 | ENSG00000272574.1  | -0.032901857 | -0.203414563 | -1.220101991 |
| SYNGR3     | ENSG00000127561.14 | -0.205718106 | 2.540663221  | 2.434530502  |
| PTGES3P1   | ENSG00000234518.2  | 3.067580378  | -2.054048733 | 1.294579196  |
| CA8        | ENSG00000178538.9  | -2.729110189 | 5.021859003  | 4.866655682  |
| AC087289.3 | ENSG00000267426.5  | 0.837746067  | -0.928233637 | -1.247722405 |
| AL139353.1 | ENSG00000203546.7  | -1.712018444 | -0.573761346 | -0.233354451 |
| AC021483.2 | ENSG00000261229.6  | -2.320055305 | -0.67919193  | -0.303509779 |
| AC138969.2 | ENSG00000227827.3  | -2.636170646 | -0.131903251 | 0.110838569  |
| TGFBR3L    | ENSG00000260001.6  | 1.706812921  | -0.019237399 | 0.631918781  |
| AC004908.3 | ENSG00000273402.1  | -1.606774398 | -1.565971008 | -1.125191814 |
| SLC22A4    | ENSG00000197208.5  | 2.202116352  | -0.201562316 | -0.664639532 |
| AC106782.6 | ENSG00000274653.1  | 1.351295494  | -1.395895382 | -1.377593374 |
| CU634019.1 | ENSG00000277067.4  | -0.096520868 | -1.009091509 | 0.245416189  |
| VDAC1P8    | ENSG00000229036.7  | -2.584448079 | -1.776856863 | -0.674435057 |
| AL590999.1 | ENSG00000235033.7  | -1.256257503 | -1.483678038 | -0.982780767 |
| PRKCZ-AS1  | ENSG00000182873.5  | 0.542666229  | 0.540164101  | -0.084696783 |
| AC007390.2 | ENSG00000272054.1  | -1.561523719 | -2.319644885 | -2.386958078 |
| CU633904.1 | ENSG00000276077.4  | -0.312172295 | -1.2442354   | 0.294569654  |
| LINC00337  | ENSG00000225077.2  | 1.076892713  | 0.305253288  | -2.539809524 |

| 7951_mRNA   | HTB69_mRNA  | SH4_mRNA    |
|-------------|-------------|-------------|
| 14.07325311 | 14.97926653 | 14.56142122 |
| 13.7927964  | 15.28564697 | 14.53672272 |
| 13.83213689 | 14.97165528 | 14.12054611 |
| 14.26718931 | 15.12743186 | 14.76353311 |
| 13.20446467 | 14.63879239 | 13.96238051 |
| 14.13592182 | 14.9749507  | 14.44421138 |
| 12.56632007 | 14.18774427 | 13.64152785 |
| 12.0387324  | 12.05495621 | 12.3597337  |
| 13.25956896 | 14.81116897 | 14.17275597 |
| 11.99697296 | 13.77686859 | 12.68929042 |
| 11.95470719 | 13.26256807 | 13.00862642 |
| 11.88565357 | 12.81380039 | 12.37126709 |
| 12.55214872 | 13.65179966 | 12.82905952 |
| 12.56919595 | 13.86211414 | 13.80811    |
| 11.37903681 | 12.34504169 | 12.61828397 |
| 12.4801217  | 11.3080516  | 10.93354523 |
| 11.04191038 | 12.85638339 | 12.23475856 |
| 11.05396761 | 11.05274351 | 11.01572991 |
| 11.35828865 | 10.77271527 | 11.06209442 |
| 10.66024541 | 10.53405127 | 11.65963651 |
| 11.7334547  | 11.12854715 | 10.72691256 |
| 10.59839038 | 10.6365532  | 11.06007137 |
| 10.3451321  | 10.64855275 | 10.72100293 |
| 11.24371312 | 11.26956139 | 10.46210556 |
| 10.5692452  | 10.23037928 | 10.48915134 |
| 11.0335164  | 10.61263897 | 10.36953363 |
| 10.36294143 | 10.10097398 | 11.04472613 |
| 9.962816028 | 10.45411028 | 10.36280134 |
| 10.35501514 | 10.15788    | 10.08863705 |
| 10.35281124 | 9.886794994 | 10.55429318 |
| 9.929565999 | 11.14133852 | 10.7414477  |
| 10.72925298 | 10.90696291 | 10.85359717 |
| 10.56818826 | 9.86114288  | 10.32223669 |
| 12.74834651 | 10.64734641 | 9.888835488 |
| 9.879660288 | 10.00523386 | 10.16372702 |
| 9.641794348 | 9.62441459  | 10.07923758 |
| 9.624322129 | 10.01831667 | 10.22252391 |
| 10.37837341 | 10.08621643 | 9.649170168 |
| 11.26589748 | 9.903347335 | 10.02238273 |
| 9.547868188 | 10.10417193 | 10.47429425 |
| 12.98336871 | 9.705293669 | 11.1784967  |
| 10.25159872 | 9.529979029 | 10.09404711 |
| 9.894169233 | 9.528774324 | 9.599186916 |
| 9.831468442 | 9.474641181 | 10.37479341 |
| 9.876669449 | 11.19280629 | 10.46686732 |



|             |             |             |
|-------------|-------------|-------------|
| 9.907511507 | 9.487381672 | 9.846291198 |
| 9.693508564 | 9.629522926 | 9.852287584 |
| 9.460721584 | 10.53233216 | 10.82595471 |
| 11.79586092 | 10.79960711 | 10.38587921 |
| 9.866106002 | 9.439465691 | 10.61251838 |
| 9.578621676 | 9.55070018  | 9.933066061 |
| 9.556263004 | 9.510416817 | 10.27210011 |
| 9.663783771 | 9.400078423 | 10.47522009 |
| 9.587110475 | 9.939874422 | 9.516991367 |
| 10.09298144 | 9.545034625 | 10.43930233 |
| 12.56095392 | 10.00467418 | 9.36685318  |
| 9.697824132 | 10.84125792 | 9.974716749 |
| 9.884313078 | 10.23289363 | 10.21734455 |
| 10.24345322 | 9.377951526 | 10.56279497 |
| 9.351333716 | 9.778309034 | 10.29674597 |
| 9.659749443 | 9.287490867 | 9.635542459 |
| 9.307294592 | 9.255937891 | 9.774198583 |
| 9.246871474 | 9.835692314 | 9.833272686 |
| 11.55043923 | 9.888623402 | 11.22935292 |
| 9.741448844 | 9.722109569 | 10.04155914 |
| 9.778977509 | 9.158272556 | 10.41612181 |
| 9.898394637 | 9.172701541 | 9.873208578 |
| 9.604060819 | 9.577767697 | 9.428077114 |
| 10.11508106 | 9.541209585 | 10.05505068 |
| 9.218331196 | 10.34796374 | 10.00203606 |
| 10.46738315 | 9.939541339 | 9.940934807 |
| 10.2903074  | 9.9000238   | 9.804599677 |
| 10.63852459 | 9.174139109 | 11.17630318 |
| 9.589213154 | 9.109869806 | 9.759908804 |
| 9.101846333 | 9.234232562 | 9.1132809   |
| 9.775766398 | 9.10080297  | 10.31454178 |
| 9.414697391 | 10.06464535 | 9.171349356 |
| 9.673914808 | 11.04188154 | 10.20350742 |
| 9.732809174 | 9.723145343 | 9.623877178 |
| 8.984923981 | 9.218752204 | 9.300108657 |
| 9.129921136 | 9.152848702 | 9.475299547 |
| 9.63449284  | 9.164043311 | 9.894831493 |
| 9.888654907 | 10.19732271 | 9.089079131 |
| 9.004077567 | 9.062822357 | 9.259663468 |
| 9.279241225 | 9.344353257 | 10.41134312 |
| 9.836976136 | 10.09047948 | 9.879107501 |
| 9.332615828 | 9.09556145  | 9.58699776  |
| 10.49360088 | 9.385671637 | 9.428564534 |
| 9.313911104 | 10.28267645 | 8.981105156 |
| 9.897987943 | 9.673661321 | 9.767521286 |
| 9.714849062 | 9.652629413 | 9.872050561 |

|             |             |             |
|-------------|-------------|-------------|
| 9.409814929 | 8.99685032  | 9.31939491  |
| 9.353353731 | 9.755224822 | 9.348477713 |
| 9.302045977 | 8.817651369 | 9.208462222 |
| 8.787728349 | 10.51465598 | 9.850627932 |
| 8.941388612 | 9.482658633 | 9.646176963 |
| 8.773000998 | 9.286353707 | 9.039834494 |
| 9.341463554 | 8.79315764  | 9.949449098 |
| 8.780123258 | 9.052447049 | 9.338168094 |
| 10.80616573 | 9.796534715 | 10.64806005 |
| 9.515177462 | 9.163280762 | 9.73458488  |
| 8.699364887 | 9.161663539 | 9.689118238 |
| 8.747737703 | 9.128533323 | 9.148041892 |
| 9.017774652 | 8.979377337 | 9.350701648 |
| 10.78633102 | 9.074691056 | 9.14138223  |
| 9.555593258 | 9.990177323 | 10.17776953 |
| 8.976105853 | 8.84407863  | 9.460231595 |
| 9.466409357 | 9.869216804 | 9.946533859 |
| 8.958536954 | 8.668119541 | 8.877245499 |
| 8.955892037 | 8.94696362  | 8.863055259 |
| 10.58713229 | 9.665049268 | 10.96470719 |
| 9.182273952 | 9.161787351 | 9.29452914  |
| 9.18291648  | 9.107102926 | 9.729323537 |
| 8.553831046 | 9.303089329 | 9.207080896 |
| 9.031115273 | 8.908559852 | 9.134412071 |
| 9.116227737 | 9.758749868 | 8.595692669 |
| 9.294456655 | 9.080433595 | 8.62159889  |
| 8.533391746 | 9.459987519 | 8.915576469 |
| 9.361130435 | 8.599279523 | 8.899336397 |
| 9.115661385 | 9.119387811 | 9.201872473 |
| 8.555818709 | 9.651465137 | 9.269488313 |
| 9.167102145 | 8.654929351 | 8.915860336 |
| 8.604157029 | 8.771011173 | 9.112743894 |
| 10.40134607 | 9.888052198 | 9.695598695 |
| 8.513602549 | 9.342893419 | 9.743402937 |
| 9.050034219 | 8.57551562  | 9.042563129 |
| 8.802826705 | 8.97448761  | 9.104137398 |
| 9.331756233 | 8.679892395 | 9.06790141  |
| 9.802101269 | 9.417606919 | 9.897892035 |
| 8.467118724 | 8.64496317  | 8.498471198 |
| 9.072269147 | 8.666865306 | 9.700384363 |
| 8.390021268 | 9.152146401 | 9.332262157 |
| 10.0303315  | 10.29430439 | 11.46046912 |
| 8.719315586 | 8.417595511 | 8.653307218 |
| 9.752599889 | 8.70843217  | 8.421888801 |
| 8.471977599 | 8.458670085 | 8.690997539 |
| 8.332985774 | 8.895249588 | 9.821117963 |

|             |             |             |
|-------------|-------------|-------------|
| 9.219698415 | 8.400457325 | 8.803019531 |
| 8.347812227 | 8.766045312 | 8.519407377 |
| 8.532698086 | 8.583014465 | 8.560711844 |
| 8.849713346 | 9.483883977 | 9.313644125 |
| 8.833183968 | 8.5696203   | 8.551694847 |
| 9.017513172 | 9.12110833  | 9.716771157 |
| 9.007453198 | 8.573652471 | 8.744963217 |
| 8.303096966 | 8.546391218 | 9.078345704 |
| 8.489676474 | 8.731309917 | 9.301413254 |
| 8.678844668 | 8.326320298 | 8.758447344 |
| 9.312874089 | 8.634296446 | 9.403711177 |
| 9.619138376 | 8.683102593 | 8.565356317 |
| 8.695525331 | 10.42977211 | 9.003881976 |
| 8.385557489 | 8.865683784 | 9.655334875 |
| 8.462909443 | 8.685520305 | 9.652936004 |
| 9.631870719 | 8.587943981 | 9.004961933 |
| 8.793815942 | 9.292248419 | 10.03054624 |
| 8.52279765  | 8.709098104 | 8.816449759 |
| 9.422449946 | 8.225673558 | 9.41827295  |
| 8.260008923 | 8.41528674  | 8.895538701 |
| 9.396943911 | 8.91652494  | 9.023822602 |
| 8.978444556 | 9.112572286 | 9.617403138 |
| 9.084202841 | 8.398020427 | 9.489246969 |
| 8.488650452 | 8.517160502 | 8.622313039 |
| 9.584402252 | 8.521895743 | 9.602547094 |
| 9.659157079 | 9.054491688 | 9.054489169 |
| 8.424939147 | 8.521915518 | 8.350991105 |
| 8.319861585 | 8.253489826 | 8.522276188 |
| 8.202679993 | 8.898388864 | 8.932910029 |
| 8.186363462 | 8.56204497  | 8.459179761 |
| 8.695291694 | 8.179865973 | 9.480026895 |
| 8.415961711 | 8.213610803 | 8.136765639 |
| 8.820070989 | 8.564579818 | 8.56028674  |
| 8.580339965 | 8.179073868 | 8.375554589 |
| 8.313756998 | 8.475387732 | 9.007889882 |
| 9.092519227 | 8.137635972 | 8.85742899  |
| 9.260295846 | 8.212171386 | 8.544152052 |
| 9.683926288 | 8.236468503 | 11.26681317 |
| 8.689678571 | 8.96082224  | 8.409233955 |
| 8.452772707 | 8.378240298 | 8.229155504 |
| 8.075726094 | 8.657995495 | 8.990600409 |
| 8.688956367 | 8.082679724 | 9.404020806 |
| 8.771435831 | 8.587847355 | 8.663005744 |
| 8.781416884 | 8.131060863 | 8.113094136 |
| 8.302286519 | 8.420751404 | 8.106268542 |
| 8.679358896 | 8.536564811 | 8.770081872 |

|             |             |             |
|-------------|-------------|-------------|
| 8.233344335 | 8.920726663 | 9.571464152 |
| 8.314339685 | 8.815448807 | 8.467561899 |
| 8.168442384 | 8.073236433 | 8.511731142 |
| 8.86652213  | 8.136410574 | 8.766133145 |
| 8.0389359   | 8.544299268 | 8.661064817 |
| 8.012881412 | 8.217268652 | 8.387125103 |
| 8.77282061  | 8.313858412 | 8.626491528 |
| 8.140655025 | 8.504683542 | 8.314347899 |
| 10.47006115 | 10.82914701 | 8.963398031 |
| 7.999689577 | 8.897903225 | 8.541319631 |
| 9.022598651 | 8.274523304 | 8.457116014 |
| 8.419620134 | 7.989062424 | 8.111058995 |
| 8.104533726 | 8.602016115 | 8.177563959 |
| 8.852473247 | 9.063386773 | 8.594936387 |
| 8.995918544 | 8.781823673 | 8.01348904  |
| 8.37880811  | 8.212184397 | 8.174904851 |
| 9.505750704 | 9.836842912 | 10.4183613  |
| 9.15453684  | 8.177828262 | 8.672549241 |
| 8.550290944 | 8.017058885 | 8.289696683 |
| 11.30065497 | 9.846973253 | 8.604151507 |
| 8.744728256 | 9.078531526 | 8.371451053 |
| 8.529032451 | 8.78002393  | 8.304630924 |
| 8.224099402 | 8.046290801 | 8.218873125 |
| 10.23003802 | 11.01098553 | 12.33720503 |
| 9.069378059 | 8.104295699 | 8.293369686 |
| 8.309367052 | 7.971385029 | 8.267117388 |
| 9.146667942 | 9.173545747 | 7.988003864 |
| 8.731107002 | 9.532915505 | 9.411068793 |
| 8.302850555 | 7.877590017 | 8.141198439 |
| 8.114894042 | 8.505378701 | 8.082970032 |
| 10.18378783 | 8.550098376 | 8.9089707   |
| 8.172310976 | 8.131486618 | 8.245673877 |
| 8.447171137 | 8.204100929 | 8.469115263 |
| 8.361060898 | 7.929122167 | 8.263197882 |
| 7.858280124 | 8.63971544  | 8.698563162 |
| 7.902517014 | 8.301106671 | 8.104983291 |
| 11.08153012 | 10.67174111 | 7.951479201 |
| 7.871486545 | 8.050412536 | 8.398488798 |
| 9.262733654 | 8.672086232 | 8.714588404 |
| 7.967186197 | 8.381888594 | 8.027928689 |
| 8.557489076 | 7.896293874 | 8.110379979 |
| 8.152760468 | 7.888597448 | 8.08444889  |
| 9.217313897 | 8.426992733 | 8.504609934 |
| 7.872661317 | 8.514598216 | 8.282059025 |
| 8.006104238 | 8.252764067 | 8.570181463 |
| 8.31616739  | 9.45593541  | 8.924610412 |

|             |             |             |
|-------------|-------------|-------------|
| 9.028997233 | 9.140064465 | 8.220592797 |
| 8.124890055 | 7.779739634 | 9.420115783 |
| 7.822128974 | 9.035549515 | 9.024899502 |
| 8.776499943 | 7.848107919 | 8.463848661 |
| 8.368755165 | 8.488971089 | 8.760688222 |
| 10.31223773 | 9.534602676 | 10.60043139 |
| 8.783096409 | 9.214704685 | 8.160193715 |
| 9.87891858  | 8.609379889 | 8.013050032 |
| 8.164968665 | 7.792381616 | 8.046051603 |
| 7.988385713 | 7.809049515 | 8.396782465 |
| 7.917141551 | 7.792471496 | 9.015629504 |
| 8.4854341   | 8.505999235 | 8.239256893 |
| 7.775472967 | 9.148808001 | 8.918952774 |
| 7.852297507 | 9.315309335 | 8.476552756 |
| 7.839101449 | 8.048983479 | 8.398728714 |
| 8.06537332  | 8.041093972 | 8.782331441 |
| 8.401490945 | 7.734386559 | 7.97189926  |
| 8.214492882 | 8.259605579 | 8.087281187 |
| 8.690155915 | 8.18393231  | 8.393940616 |
| 9.642544871 | 9.298902453 | 8.077526359 |
| 7.749860555 | 7.715347804 | 8.463376293 |
| 8.350983704 | 7.743605051 | 7.849271588 |
| 7.864504745 | 9.275399207 | 8.619311385 |
| 7.771843853 | 8.136510959 | 8.561996507 |
| 8.230033454 | 7.705965353 | 8.49329172  |
| 8.208820424 | 8.54787738  | 7.70089189  |
| 8.205582189 | 7.800971668 | 7.797330824 |
| 7.756460165 | 7.762209714 | 8.123106489 |
| 9.036777454 | 7.780230935 | 8.617441926 |
| 8.717392012 | 8.398113852 | 8.546497077 |
| 8.242590289 | 7.856434579 | 8.517857008 |
| 8.962416046 | 7.775936116 | 8.353359255 |
| 8.227496674 | 7.673121679 | 8.568528036 |
| 8.165760359 | 8.091552414 | 7.715808877 |
| 8.653097916 | 7.671466973 | 7.835846402 |
| 9.015234428 | 8.364712491 | 8.771632531 |
| 8.647974623 | 8.575543735 | 9.084108239 |
| 8.749063316 | 8.647999056 | 8.287628023 |
| 10.77714697 | 8.800617904 | 9.634080769 |
| 8.025889412 | 10.25137731 | 9.407702656 |
| 7.736759357 | 8.097100576 | 8.018498459 |
| 8.743018186 | 7.723256665 | 8.232892042 |
| 8.595694738 | 8.774761008 | 8.283033115 |
| 8.568204536 | 7.707709827 | 8.132079922 |
| 8.954040601 | 8.429898033 | 8.682668946 |
| 8.019640331 | 8.475896866 | 8.588778839 |

|             |             |             |
|-------------|-------------|-------------|
| 7.642510648 | 8.992765022 | 9.076512547 |
| 8.952791238 | 7.76278798  | 8.445570078 |
| 7.696873087 | 7.948793151 | 8.511376149 |
| 7.979969464 | 8.296069492 | 8.022569087 |
| 7.715899419 | 8.176723365 | 7.745418038 |
| 8.196904465 | 8.378119947 | 7.59849035  |
| 8.887082002 | 7.806090455 | 8.51879769  |
| 8.445546948 | 8.304945475 | 7.920945569 |
| 8.334725146 | 7.59165127  | 8.042395021 |
| 8.400665573 | 8.548419915 | 7.761045741 |
| 7.971458417 | 7.658659776 | 7.838958231 |
| 8.289630318 | 7.932471501 | 8.176735946 |
| 7.64164018  | 7.694989589 | 9.487156634 |
| 7.864468538 | 7.633812727 | 8.503665824 |
| 8.609619831 | 7.648559402 | 8.334590287 |
| 8.02830845  | 8.267327878 | 8.516317457 |
| 9.310541418 | 8.612090275 | 8.222481687 |
| 7.908152681 | 7.841141597 | 7.647745988 |
| 7.668977045 | 7.669247942 | 7.594994627 |
| 7.916064838 | 7.622848699 | 8.120733494 |
| 7.860090222 | 7.542130478 | 7.855133672 |
| 9.585216369 | 8.392769504 | 8.168883594 |
| 8.502341059 | 8.59227467  | 7.652160151 |
| 8.429901668 | 8.109344286 | 8.357592189 |
| 8.2247992   | 8.209226399 | 8.30341531  |
| 7.855797428 | 8.345577587 | 7.774542634 |
| 7.862850216 | 7.557386948 | 7.94871286  |
| 7.663060403 | 7.742394911 | 8.188236365 |
| 7.534456793 | 9.233063162 | 8.176474307 |
| 7.509369197 | 9.12509558  | 8.701193409 |
| 8.892914657 | 9.14373993  | 8.873923617 |
| 8.815751023 | 7.948971853 | 8.712675777 |
| 8.85480138  | 7.933840219 | 8.492436964 |
| 8.849544533 | 7.52843551  | 7.917435902 |
| 7.837368591 | 7.649657429 | 7.526396402 |
| 7.997160794 | 8.357709576 | 7.615397378 |
| 7.805978271 | 8.322944299 | 8.240304906 |
| 8.135629905 | 8.352175433 | 7.679831961 |
| 7.968538629 | 7.43469074  | 7.746377192 |
| 8.396672393 | 8.729777143 | 7.555782265 |
| 8.208517383 | 8.177909385 | 8.114981611 |
| 8.584741692 | 7.452429684 | 9.196579992 |
| 9.914600125 | 9.896481261 | 7.950713834 |
| 7.522658641 | 7.433291637 | 7.845600184 |
| 8.827874752 | 8.544224677 | 7.964022481 |
| 7.908911141 | 7.528999633 | 8.759413304 |

|             |             |             |
|-------------|-------------|-------------|
| 7.93425511  | 8.441847173 | 8.605385944 |
| 7.947177315 | 7.993317371 | 7.483482921 |
| 8.87944133  | 8.384543651 | 8.793228929 |
| 8.725899871 | 10.32857541 | 8.97505196  |
| 8.372048262 | 7.712147979 | 8.122027952 |
| 8.122292353 | 8.105499136 | 7.90268525  |
| 8.281247893 | 8.49158707  | 8.608305905 |
| 7.415212599 | 7.817721833 | 7.397607591 |
| 10.52446126 | 8.1511774   | 9.92640137  |
| 8.501752403 | 7.422648686 | 7.99307147  |
| 7.97295194  | 7.546097183 | 7.487705177 |
| 8.514773936 | 7.57069946  | 7.493958045 |
| 7.423644229 | 7.579954505 | 8.059260935 |
| 7.810528789 | 7.4332452   | 7.713211721 |
| 8.36139456  | 7.401618643 | 7.68988035  |
| 7.580297394 | 7.463706617 | 7.733210534 |
| 8.206351089 | 8.101414161 | 8.684113003 |
| 7.99260771  | 7.540847335 | 7.807381151 |
| 7.725481647 | 7.391433812 | 7.589219892 |
| 7.711340549 | 7.464718743 | 7.603647925 |
| 7.309572406 | 8.388480688 | 8.468743387 |
| 9.341799322 | 7.464494818 | 8.296643916 |
| 8.172718312 | 8.100198057 | 8.170100255 |
| 7.39620414  | 7.455478804 | 8.920085085 |
| 7.4390622   | 7.631208742 | 7.443054678 |
| 10.19912734 | 9.346510872 | 9.72212472  |
| 7.632033037 | 7.915741306 | 8.166677815 |
| 7.700209644 | 7.486683415 | 8.010445372 |
| 8.19968107  | 7.830601089 | 7.724009676 |
| 7.572923311 | 7.693990885 | 7.537242861 |
| 7.658503634 | 7.753139253 | 7.480964909 |
| 7.368203108 | 7.634996858 | 8.577294505 |
| 8.120719857 | 8.636406983 | 7.443496606 |
| 8.075704984 | 7.562976096 | 8.07012026  |
| 7.2777621   | 7.904522903 | 8.889529834 |
| 8.320227476 | 7.512067969 | 8.128073592 |
| 8.047834224 | 7.288728007 | 8.110881023 |
| 8.525881283 | 7.575283598 | 8.141430796 |
| 8.079135017 | 7.788162168 | 8.020786298 |
| 7.369712081 | 7.310357268 | 8.467000535 |
| 7.25882994  | 7.606553025 | 7.96273732  |
| 7.296253459 | 7.957648702 | 7.329801187 |
| 8.031656436 | 7.803248081 | 7.411601128 |
| 9.048178593 | 9.231249803 | 9.046829524 |
| 8.290123398 | 7.789561994 | 8.129636547 |
| 7.7229634   | 7.278606708 | 8.772880566 |

|             |             |             |
|-------------|-------------|-------------|
| 8.510744061 | 7.672987884 | 8.078401871 |
| 8.304444776 | 7.341759205 | 8.579313491 |
| 9.042059746 | 7.363495602 | 7.606730589 |
| 7.36040062  | 7.934969745 | 8.156201926 |
| 8.647648301 | 8.719272237 | 8.686753909 |
| 9.698657043 | 9.281498422 | 7.733118985 |
| 8.13298262  | 7.512021567 | 8.242866954 |
| 7.91910254  | 8.802671401 | 8.26732926  |
| 7.667696416 | 7.271129216 | 7.352521036 |
| 7.703525543 | 8.923574904 | 8.103131675 |
| 7.290026927 | 7.428179865 | 8.163426678 |
| 7.50455454  | 7.326199077 | 8.328647425 |
| 7.386182998 | 7.497057388 | 7.534332319 |
| 7.901544518 | 7.233915801 | 7.283560231 |
| 8.535637335 | 7.900136575 | 8.387554521 |
| 8.012575819 | 7.411650066 | 7.728087279 |
| 8.40331502  | 7.35660322  | 8.283915034 |
| 7.63908466  | 7.760340815 | 7.463985112 |
| 7.452616098 | 7.32051676  | 7.370083529 |
| 7.474725785 | 7.616157048 | 7.286151858 |
| 7.549742764 | 7.244734313 | 7.258403124 |
| 7.267369081 | 7.630621594 | 8.350893422 |
| 7.661787398 | 7.323866015 | 7.415877988 |
| 7.896339067 | 7.682805821 | 7.696651229 |
| 7.358864348 | 7.229859541 | 7.396930263 |
| 7.639218644 | 7.997507721 | 7.377551059 |
| 7.7917259   | 7.22180993  | 7.588436145 |
| 8.082661436 | 8.14498813  | 7.54489365  |
| 7.573512564 | 7.224152735 | 7.794479827 |
| 9.327103027 | 7.29320821  | 7.696409055 |
| 8.563877562 | 7.60688175  | 8.074429263 |
| 7.808273168 | 7.213258768 | 7.960430825 |
| 8.312674705 | 8.73923049  | 9.53054359  |
| 7.697811085 | 7.686462244 | 7.679147522 |
| 8.155920184 | 8.799834829 | 9.582998321 |
| 7.792154089 | 8.30229131  | 7.245658068 |
| 7.632451969 | 7.22068005  | 7.398218122 |
| 10.63864466 | 7.438466371 | 7.58571997  |
| 7.183794752 | 7.374666951 | 7.597576661 |
| 7.51884106  | 7.837012654 | 7.659616738 |
| 7.786697328 | 7.240434163 | 7.752655464 |
| 7.426038764 | 7.999396101 | 8.378852867 |
| 7.795166198 | 7.538134879 | 7.767647207 |
| 7.716960108 | 7.574585605 | 7.964819881 |
| 7.706565023 | 8.245837582 | 7.293994668 |
| 7.32340217  | 8.915416058 | 7.553896438 |



|             |             |             |
|-------------|-------------|-------------|
| 7.549661145 | 7.429374061 | 9.098724339 |
| 7.511044718 | 7.466838211 | 7.674607924 |
| 7.836846868 | 7.381868311 | 7.486330411 |
| 8.191639302 | 7.902610868 | 9.351849239 |
| 8.666324673 | 7.438602194 | 8.409433608 |
| 8.582145296 | 7.16830524  | 7.201403604 |
| 7.520759443 | 7.162304693 | 7.450418489 |
| 8.117633255 | 9.691782367 | 10.07358948 |
| 8.057743271 | 7.19840266  | 8.091059784 |
| 7.529712251 | 7.551726673 | 7.80091166  |
| 9.549184329 | 7.94326254  | 8.468600317 |
| 7.451667748 | 7.298572956 | 8.473432936 |
| 7.507621712 | 8.330197204 | 8.548150768 |
| 7.735941949 | 7.324889443 | 7.496039704 |
| 7.432998395 | 7.183115345 | 8.024684045 |
| 7.119798834 | 8.248343423 | 8.103753402 |
| 7.185139394 | 7.491991218 | 7.850591879 |
| 7.163196351 | 7.228257068 | 7.550976936 |
| 9.607731375 | 7.42921359  | 7.690494685 |
| 8.408961693 | 8.998923566 | 9.708507437 |
| 7.313146855 | 7.98505142  | 7.987282657 |
| 7.383993626 | 8.433208982 | 7.988947896 |
| 7.201721692 | 8.080572489 | 8.409532095 |
| 9.148205036 | 8.136739161 | 7.098271236 |
| 8.231424454 | 7.831087883 | 7.465351234 |
| 8.088828629 | 7.105185793 | 8.104540942 |
| 8.482730009 | 7.508099977 | 8.017346849 |
| 7.728413582 | 7.531673267 | 7.25993427  |
| 7.567175618 | 8.106919716 | 7.910770938 |
| 7.90227935  | 7.379368355 | 8.426334647 |
| 7.986229649 | 7.801204439 | 8.185594168 |
| 7.13366052  | 7.760257503 | 9.243400875 |
| 7.694450825 | 7.492185147 | 7.160717754 |
| 7.49709591  | 7.460524393 | 7.617717958 |
| 7.405041445 | 7.593998066 | 7.106691474 |
| 7.51214835  | 7.173102372 | 7.476721671 |
| 7.374463677 | 7.124490876 | 7.585512898 |
| 7.131582719 | 7.345014838 | 7.281077847 |
| 7.492038568 | 7.847247876 | 8.051245042 |
| 7.435387892 | 7.405451538 | 8.53395318  |
| 7.371476742 | 7.116685378 | 7.344098287 |
| 9.002062479 | 7.482367409 | 7.991585965 |
| 8.593042151 | 7.651891736 | 7.541902284 |
| 7.270076376 | 7.088416846 | 8.067735981 |
| 8.469351096 | 8.342235826 | 8.342569602 |
| 8.053005696 | 8.004422239 | 9.265552579 |

|             |             |             |
|-------------|-------------|-------------|
| 7.532338206 | 7.432275751 | 7.894372007 |
| 7.490851569 | 7.986360514 | 7.373063792 |
| 7.687698704 | 7.379106648 | 7.717008554 |
| 8.032181841 | 7.808704879 | 7.098997902 |
| 8.019032014 | 9.43945921  | 8.501705149 |
| 7.38029979  | 7.646816296 | 7.746047628 |
| 7.592775571 | 7.850279658 | 7.092537195 |
| 7.791580455 | 7.149239966 | 7.60847545  |
| 7.661197887 | 7.894613961 | 8.388014159 |
| 7.349937834 | 7.940138043 | 7.086214896 |
| 7.097400841 | 7.397646514 | 9.016065958 |
| 7.381465139 | 7.413352955 | 7.244192441 |
| 7.177084212 | 7.555244843 | 8.269064351 |
| 7.458307375 | 7.217371785 | 7.437372491 |
| 7.197619483 | 8.375018823 | 7.484630138 |
| 7.360674339 | 7.214131038 | 7.232389301 |
| 7.721955282 | 7.86610917  | 7.037601868 |
| 7.504487588 | 7.758902709 | 7.621288178 |
| 7.436926586 | 7.601916446 | 7.449502231 |
| 8.054526979 | 7.84965589  | 8.70333944  |
| 9.314551414 | 8.961680668 | 8.938117146 |
| 9.435887561 | 7.281462134 | 7.016290141 |
| 7.012736193 | 7.710692286 | 7.881680717 |
| 7.024601899 | 8.084217818 | 8.123357538 |
| 7.737067601 | 7.198435782 | 7.632432354 |
| 8.672297871 | 7.380650412 | 8.108253214 |
| 8.003841483 | 7.585731169 | 7.745121145 |
| 8.019206814 | 7.119835275 | 7.702077384 |
| 7.986514204 | 8.825582357 | 7.904300035 |
| 7.836858784 | 7.434490455 | 8.040145168 |
| 7.104705052 | 7.305179821 | 7.020547152 |
| 7.700205241 | 7.621455582 | 7.014505538 |
| 7.76351664  | 7.529925117 | 8.111698763 |
| 7.258099859 | 7.063164305 | 7.023972682 |
| 8.442057835 | 7.956152109 | 8.705764016 |
| 7.49512219  | 6.997625444 | 7.227337702 |
| 8.228218716 | 6.999169934 | 8.025297837 |
| 9.560411377 | 9.301840997 | 9.608324295 |
| 8.304631608 | 8.519154215 | 7.935788457 |
| 7.055365114 | 7.178815929 | 7.666397564 |
| 7.078094483 | 7.406468818 | 7.81375302  |
| 7.520060963 | 7.191760608 | 7.206380634 |
| 7.383160173 | 7.295932083 | 7.774783625 |
| 7.85012138  | 7.250781059 | 7.695726387 |
| 7.464194774 | 6.965799826 | 7.996290455 |
| 7.615533403 | 7.831002667 | 8.073199047 |

|             |             |             |
|-------------|-------------|-------------|
| 7.106983737 | 7.652056309 | 7.466750574 |
| 8.501571722 | 7.919246641 | 7.06948904  |
| 7.588701744 | 7.556397587 | 7.119359137 |
| 8.371049687 | 8.131716673 | 8.108078569 |
| 7.242935912 | 7.442231421 | 7.034550231 |
| 7.946231921 | 7.228383104 | 7.489880251 |
| 7.127372817 | 6.996842068 | 8.278290451 |
| 8.443569677 | 7.561036365 | 7.467775999 |
| 8.104035633 | 7.237959558 | 7.15974703  |
| 7.672108035 | 6.957792134 | 8.044341259 |
| 7.303908363 | 7.463925558 | 7.68785977  |
| 7.744884975 | 6.972625102 | 7.933314139 |
| 7.563972943 | 6.997808785 | 7.542790789 |
| 7.134469302 | 7.289119469 | 6.945162914 |
| 7.856204627 | 7.267668065 | 6.993851131 |
| 7.837976402 | 6.921607705 | 7.492008709 |
| 7.652670043 | 8.101521864 | 7.436252546 |
| 8.075826979 | 7.2222998   | 7.529184348 |
| 8.29760225  | 6.92597993  | 8.916947318 |
| 7.123960998 | 6.928956582 | 7.117189595 |
| 7.209723968 | 6.875350816 | 7.820843414 |
| 7.153844782 | 7.288630244 | 7.066584308 |
| 7.566578472 | 6.966672668 | 7.452269373 |
| 7.449725797 | 8.45865357  | 7.854478064 |
| 7.639966612 | 7.29474209  | 8.433123887 |
| 6.986867977 | 7.321589644 | 7.163029544 |
| 8.812696926 | 8.386972868 | 8.030946048 |
| 8.717226473 | 7.815332217 | 7.709271751 |
| 6.911131456 | 7.556367516 | 7.281336054 |
| 8.09837601  | 6.917639583 | 9.026194863 |
| 7.024312259 | 7.792613457 | 8.118842254 |
| 7.455480982 | 7.447659992 | 8.033983423 |
| 6.983651014 | 7.026490119 | 7.666675866 |
| 6.95954958  | 7.525065996 | 7.512790825 |
| 7.636167018 | 7.998003285 | 7.371951741 |
| 8.813294276 | 6.971525015 | 6.872732966 |
| 7.402455862 | 7.531235557 | 7.858324638 |
| 6.899344309 | 8.412055167 | 7.003017153 |
| 7.163369785 | 7.98818455  | 7.630438881 |
| 7.629460361 | 7.645599568 | 7.663712132 |
| 6.96992778  | 7.059020605 | 7.056384032 |
| 7.957156265 | 7.487253198 | 7.872407375 |
| 7.515252525 | 8.525646923 | 7.214468179 |
| 7.636382533 | 8.459602184 | 9.016170701 |
| 7.723715446 | 7.173148085 | 7.418009682 |
| 8.219859878 | 7.45527242  | 6.983047446 |

|             |             |             |
|-------------|-------------|-------------|
| 7.821835369 | 7.81545269  | 7.753905986 |
| 7.717783295 | 7.521168454 | 7.190837665 |
| 6.877734403 | 7.136571977 | 7.434929476 |
| 7.842588993 | 7.470297845 | 8.26799332  |
| 8.47681276  | 7.614611255 | 6.96960924  |
| 6.971124553 | 7.452913343 | 7.703276558 |
| 8.03017621  | 7.567979572 | 7.897918177 |
| 9.460911255 | 8.581913963 | 7.720031127 |
| 8.260310747 | 7.889800931 | 8.089289094 |
| 8.279270355 | 7.966596253 | 7.368103487 |
| 7.837017783 | 8.038100918 | 7.739465572 |
| 7.83027192  | 7.835196996 | 7.100205145 |
| 7.303937039 | 7.266690647 | 7.959759396 |
| 6.889955636 | 8.410269582 | 8.295473618 |
| 7.097532958 | 7.702515912 | 7.869030617 |
| 7.746733325 | 7.658541776 | 7.30148671  |
| 8.820105114 | 8.919361689 | 8.446718709 |
| 7.538279294 | 7.090277579 | 7.586702114 |
| 7.977541268 | 7.826711134 | 7.520769838 |
| 7.202037401 | 7.118521654 | 7.314697728 |
| 7.155134512 | 7.413655957 | 7.339393244 |
| 7.470408147 | 7.33928391  | 7.387250586 |
| 7.364484305 | 6.816367252 | 7.562688413 |
| 7.922281828 | 6.891623412 | 8.355115982 |
| 7.244051698 | 7.816014877 | 7.064748744 |
| 6.987496268 | 7.336121523 | 7.08817314  |
| 9.389466922 | 7.936032149 | 7.654334996 |
| 7.200057519 | 6.803319543 | 9.10521992  |
| 7.095231667 | 7.413546146 | 7.110146824 |
| 9.119485729 | 8.157604102 | 7.887911241 |
| 7.85280283  | 8.638853661 | 7.610319431 |
| 8.040312245 | 7.18397983  | 7.639400706 |
| 7.430354451 | 7.377444645 | 7.506353479 |
| 9.125229067 | 9.427557304 | 7.563638563 |
| 8.30645142  | 7.989235337 | 8.249901886 |
| 7.6552599   | 7.345571699 | 9.110878228 |
| 7.779354793 | 7.404753146 | 7.08666217  |
| 6.978557301 | 8.790171711 | 7.648958754 |
| 7.838344547 | 7.96470656  | 7.965069616 |
| 6.780391649 | 7.065747678 | 7.546396331 |
| 7.818949882 | 7.194148319 | 7.461764493 |
| 7.428443484 | 7.625765807 | 7.979254993 |
| 7.349508317 | 7.925950303 | 7.109634363 |
| 6.88096052  | 6.912131909 | 7.163717897 |
| 8.642821859 | 6.961266829 | 7.998209089 |
| 6.799090355 | 7.733922014 | 8.930768166 |

|             |             |             |
|-------------|-------------|-------------|
| 7.651472053 | 7.247799885 | 6.843519774 |
| 7.834470587 | 8.375298385 | 7.688521304 |
| 7.106502822 | 7.652368932 | 7.427763836 |
| 6.876820461 | 7.157086999 | 6.937564911 |
| 8.315333998 | 7.932918399 | 7.211132372 |
| 7.353080176 | 7.191114619 | 7.280914773 |
| 7.195563377 | 7.635875806 | 6.876405155 |
| 7.28260204  | 7.125140244 | 7.936169177 |
| 6.889050676 | 7.007665926 | 7.17102321  |
| 6.846026182 | 6.806121968 | 7.190825218 |
| 7.846212016 | 7.378077694 | 6.796404687 |
| 7.801039304 | 8.432600849 | 9.532311127 |
| 8.005966561 | 7.21150528  | 7.713121263 |
| 7.136126048 | 7.428348447 | 6.904849792 |
| 7.21324981  | 6.784182708 | 7.993290208 |
| 8.986049309 | 8.052011908 | 7.809500033 |
| 7.559057108 | 6.850686769 | 6.990296374 |
| 7.505831585 | 7.538718507 | 7.416520205 |
| 6.958163685 | 7.940549765 | 8.082650559 |
| 7.831531375 | 6.956742254 | 7.505109968 |
| 7.718381853 | 7.923842007 | 7.543963243 |
| 7.299949465 | 7.268251313 | 7.582129136 |
| 7.208773321 | 6.906161484 | 6.875164195 |
| 7.911846055 | 7.348845037 | 6.983792939 |
| 8.081326997 | 7.672268826 | 7.834589135 |
| 9.255757619 | 7.20078116  | 6.865870347 |
| 6.949991695 | 7.127413879 | 7.37784348  |
| 8.130923559 | 7.057003933 | 6.783598264 |
| 8.560113039 | 7.141723044 | 7.436810746 |
| 8.722382255 | 6.866123746 | 8.892153941 |
| 6.821522048 | 6.93500448  | 8.186114346 |
| 7.263353619 | 7.514101104 | 8.324092155 |
| 7.822950269 | 7.699340114 | 7.216521981 |
| 6.73182675  | 8.084534521 | 8.089615532 |
| 8.54112703  | 6.781650146 | 7.434979728 |
| 8.770145432 | 7.546164702 | 7.671548839 |
| 7.772834358 | 7.003688231 | 7.039895272 |
| 8.225668027 | 7.991079274 | 7.880560134 |
| 8.398076266 | 7.66306169  | 6.798564578 |
| 7.049299543 | 7.363155509 | 7.028869297 |
| 8.377515936 | 8.523363706 | 8.054198734 |
| 6.760897861 | 6.846243793 | 7.405834952 |
| 7.05612801  | 6.949017805 | 7.154732913 |
| 7.653737716 | 7.920701793 | 7.743947182 |
| 7.532149935 | 6.99729086  | 7.385910529 |
| 7.28680972  | 7.390050614 | 7.668955737 |

|             |             |             |
|-------------|-------------|-------------|
| 7.464539654 | 7.127508595 | 7.163911166 |
| 6.715016662 | 6.710854325 | 7.036859823 |
| 7.791003752 | 6.819857154 | 7.588845615 |
| 7.379908741 | 6.705917053 | 7.087018972 |
| 6.887513077 | 7.86393495  | 7.699337846 |
| 7.605187384 | 6.853565938 | 7.207702769 |
| 6.926887877 | 7.222167304 | 7.165444716 |
| 6.713191404 | 6.899224013 | 7.383934046 |
| 6.833590409 | 8.140287151 | 7.437973167 |
| 7.440147362 | 7.386945977 | 6.723711981 |
| 6.714333721 | 7.897638609 | 7.547411976 |
| 7.359729938 | 7.424071254 | 6.774973138 |
| 7.448101316 | 6.672806998 | 7.005351655 |
| 7.159634236 | 8.873145674 | 8.232562256 |
| 10.04506924 | 6.777459165 | 8.349185109 |
| 7.735462285 | 7.30388999  | 6.927469937 |
| 8.608570699 | 7.266659923 | 7.316428714 |
| 7.342413531 | 6.800385171 | 7.033064945 |
| 7.732697653 | 6.723135966 | 7.398983482 |
| 7.150290004 | 6.805694841 | 8.333078567 |
| 7.065984999 | 7.491813207 | 7.641759272 |
| 7.594077225 | 6.725896922 | 7.595429798 |
| 7.777526416 | 6.958368607 | 7.660514965 |
| 7.604770179 | 6.822850211 | 7.136051236 |
| 6.808512488 | 7.38615023  | 6.988092398 |
| 7.10242099  | 6.698820678 | 6.81939515  |
| 7.588271278 | 7.087863623 | 6.813319312 |
| 7.481952812 | 7.873138385 | 6.891183838 |
| 7.927380725 | 6.706544071 | 6.958560081 |
| 7.781694211 | 7.217921838 | 7.909507551 |
| 7.633370189 | 8.010717107 | 6.916243274 |
| 8.034307623 | 7.432196158 | 8.048779718 |
| 8.502965308 | 7.733486195 | 6.674012878 |
| 6.967901747 | 7.130771785 | 7.297331698 |
| 7.47474422  | 7.008685962 | 8.068114577 |
| 8.942314818 | 6.685777378 | 8.0302365   |
| 7.413374875 | 7.304797784 | 6.788782423 |
| 6.710207852 | 7.197943586 | 7.723933445 |
| 8.721066467 | 7.790688312 | 7.106811299 |
| 6.799507166 | 6.737281125 | 6.726967894 |
| 6.975365353 | 6.676895944 | 6.813387484 |
| 6.679345317 | 6.766817964 | 6.878170658 |
| 7.994267338 | 7.723407536 | 6.976507046 |
| 7.114503195 | 6.897621748 | 6.77777675  |
| 7.615532158 | 8.108092399 | 8.230903281 |
| 7.229584349 | 7.112113557 | 7.637845634 |

|             |             |             |
|-------------|-------------|-------------|
| 7.693645751 | 6.666847612 | 8.978387653 |
| 7.792596355 | 7.50105838  | 8.036837756 |
| 6.937858662 | 7.805457448 | 6.649225145 |
| 7.956170905 | 7.863812605 | 7.572899861 |
| 7.241882695 | 7.670795397 | 7.792011949 |
| 7.783236564 | 7.214484293 | 8.144814659 |
| 7.156214882 | 7.623517943 | 7.503336138 |
| 7.391390281 | 6.651047162 | 6.898083737 |
| 8.187539654 | 8.271998013 | 7.062102745 |
| 7.222226476 | 7.401093034 | 7.588620339 |
| 7.109186572 | 6.973132138 | 6.634490401 |
| 6.957363657 | 6.699459968 | 6.820366101 |
| 6.87953867  | 7.259864976 | 6.988274117 |
| 6.95843977  | 6.872351539 | 6.629952902 |
| 7.713094056 | 7.246010386 | 7.822390596 |
| 7.120543679 | 7.368593588 | 6.989728333 |
| 7.714244078 | 6.616172135 | 7.082077636 |
| 8.693687571 | 6.878848923 | 8.019540793 |
| 6.892807312 | 7.248420369 | 7.237289261 |
| 8.009828618 | 6.872449843 | 7.363883954 |
| 6.718001622 | 8.054906926 | 7.128470422 |
| 6.654221435 | 7.400090623 | 7.860517499 |
| 7.42029982  | 7.814897535 | 7.915325125 |
| 7.683841433 | 7.469261067 | 6.679588421 |
| 7.276432343 | 7.416494786 | 7.751424802 |
| 7.616208126 | 7.08624859  | 6.930651783 |
| 7.485429828 | 6.653070986 | 6.995256249 |
| 10.57689959 | 7.106301807 | 8.26548002  |
| 6.984578543 | 8.003967472 | 6.607350737 |
| 7.408069698 | 6.917920624 | 6.948358905 |
| 7.78588702  | 7.059294293 | 7.926387742 |
| 7.159454085 | 6.794818237 | 6.713602378 |
| 6.614952905 | 6.70136376  | 7.255831699 |
| 6.834028772 | 6.759914548 | 7.886144306 |
| 7.042165695 | 6.810624078 | 6.852864169 |
| 7.306644922 | 6.893300462 | 7.395307141 |
| 8.553058533 | 8.293049763 | 7.734869406 |
| 8.261180871 | 7.573717331 | 7.337864592 |
| 7.134632335 | 7.547137072 | 7.228093771 |
| 6.707028342 | 6.655843816 | 6.991591707 |
| 6.701567218 | 6.850461584 | 8.831538375 |
| 8.893819495 | 7.720490633 | 7.568221932 |
| 7.484420702 | 7.548854147 | 8.041840786 |
| 7.223403661 | 6.898865316 | 7.015516305 |
| 7.668079282 | 6.590054661 | 7.902969849 |
| 6.724307321 | 7.173604175 | 7.274587877 |

|             |             |             |
|-------------|-------------|-------------|
| 7.670835297 | 7.1877483   | 8.084397456 |
| 7.445453814 | 7.632323235 | 7.145122309 |
| 8.390957708 | 7.293613022 | 8.826373566 |
| 6.774143454 | 7.256409804 | 8.107723041 |
| 7.459003207 | 6.595142772 | 7.105313066 |
| 7.470491053 | 6.627790548 | 7.206163287 |
| 7.836144059 | 7.344782758 | 7.870128353 |
| 7.66434421  | 6.566382286 | 7.07371107  |
| 7.701041007 | 7.456475392 | 6.915881368 |
| 6.629767286 | 6.811723648 | 8.16572852  |
| 6.563464438 | 7.809096429 | 6.78371337  |
| 7.454732087 | 6.865584224 | 7.150432176 |
| 7.602280425 | 6.683374227 | 7.341199104 |
| 7.596264684 | 6.728883075 | 7.131786577 |
| 7.475669357 | 6.737733539 | 6.79073242  |
| 7.18038952  | 7.35604088  | 7.643002044 |
| 7.293367727 | 6.583248327 | 6.806203262 |
| 8.592934379 | 8.004028744 | 6.946952636 |
| 6.997741137 | 7.090083266 | 7.942012887 |
| 7.330793936 | 6.74353469  | 7.332254466 |
| 7.341556807 | 7.155792507 | 8.142876891 |
| 6.996472525 | 7.206412765 | 7.093712716 |
| 6.77912727  | 6.545963288 | 6.655814511 |
| 7.658268206 | 7.739185139 | 8.218575483 |
| 6.568098816 | 6.596623654 | 6.911997249 |
| 7.246071417 | 6.94684677  | 7.743734533 |
| 9.751506798 | 7.324865995 | 6.518354079 |
| 7.043915683 | 6.676632256 | 7.742796334 |
| 6.737238165 | 6.508418349 | 6.848882193 |
| 6.643775489 | 6.58836591  | 6.759873665 |
| 6.921977344 | 6.62949538  | 6.516229938 |
| 8.607772458 | 8.78081648  | 7.191676607 |
| 8.285847575 | 6.535680558 | 7.106357909 |
| 6.786564527 | 6.593747193 | 6.5557004   |
| 9.161300734 | 7.590407152 | 8.433428917 |
| 6.725126329 | 6.804185028 | 6.491322076 |
| 6.966520055 | 6.738346021 | 7.588684247 |
| 6.585128583 | 7.035937755 | 6.728882106 |
| 7.221660389 | 6.922124979 | 7.452549769 |
| 7.199453484 | 6.562633155 | 6.854400752 |
| 7.446238193 | 7.070022181 | 7.062373616 |
| 6.921742    | 6.720932097 | 6.773029799 |
| 7.261150482 | 6.667613163 | 6.728784145 |
| 6.788254764 | 6.657280426 | 7.168331045 |
| 6.598431231 | 6.639181812 | 8.082819714 |
| 7.974599033 | 6.892080078 | 8.317684794 |



|             |             |             |
|-------------|-------------|-------------|
| 7.168228386 | 6.898426125 | 7.456770722 |
| 7.914735105 | 8.04276094  | 7.106187081 |
| 7.211838512 | 6.786605714 | 7.287782671 |
| 6.509578829 | 7.094355676 | 7.258282854 |
| 6.669622257 | 8.07238855  | 7.405053797 |
| 9.120224649 | 8.167173318 | 8.152441811 |
| 7.543180164 | 7.935365731 | 7.219289767 |
| 8.500386539 | 7.460690943 | 7.455736153 |
| 9.403926563 | 9.000386834 | 8.752470232 |
| 6.587501512 | 6.938124445 | 6.654565297 |
| 7.461775424 | 6.591665624 | 6.537431684 |
| 7.109900255 | 6.772540254 | 6.867483587 |
| 7.18684493  | 6.839575095 | 6.943930241 |
| 7.024436531 | 6.730005914 | 6.878213313 |
| 6.632636047 | 9.690329121 | 8.952200589 |
| 7.953683396 | 7.697552307 | 6.640184073 |
| 7.24739005  | 6.627717506 | 7.683283837 |
| 6.479226583 | 6.89654246  | 6.612986647 |
| 9.686430223 | 8.681644003 | 8.798130449 |
| 7.079692485 | 6.660870763 | 7.01043657  |
| 8.248941482 | 8.284474944 | 6.980702406 |
| 7.048625951 | 6.803916809 | 6.817442376 |
| 7.693560465 | 7.009117213 | 7.034791739 |
| 6.499759937 | 7.412238582 | 7.362736764 |
| 8.041657377 | 6.678220686 | 7.603260215 |
| 9.377054483 | 8.400061886 | 8.016307004 |
| 7.668348239 | 6.544383508 | 7.352221661 |
| 6.613043756 | 7.533850067 | 6.477832039 |
| 7.382406969 | 7.250965712 | 8.227778441 |
| 7.885449169 | 9.383377348 | 8.880036766 |
| 7.598882046 | 6.453028573 | 7.684982265 |
| 6.675723753 | 7.448178336 | 7.524884936 |
| 7.219978709 | 7.952116079 | 6.589595538 |
| 6.949904233 | 6.579131676 | 6.700978447 |
| 6.460988163 | 6.673302168 | 6.9554651   |
| 6.790561671 | 7.186510392 | 7.172209512 |
| 6.827407201 | 6.766264929 | 6.599318415 |
| 7.599541879 | 6.625688403 | 7.773437748 |
| 6.592623091 | 7.042274035 | 6.75867969  |
| 6.939011014 | 6.512620758 | 6.654173485 |
| 7.389180355 | 6.602955053 | 7.234727501 |
| 6.444247689 | 7.1345071   | 7.834045519 |
| 7.316592422 | 6.452466021 | 7.141532291 |
| 7.325791906 | 6.597598294 | 7.32263681  |
| 7.50520168  | 6.836891289 | 6.910441067 |
| 6.543136317 | 7.034386253 | 6.67766712  |

|             |             |             |
|-------------|-------------|-------------|
| 8.313672748 | 7.270988689 | 8.057229774 |
| 6.909220164 | 7.065765088 | 6.537469991 |
| 8.040006707 | 6.814248844 | 7.041970307 |
| 7.45394985  | 6.670818    | 6.592418129 |
| 7.245783084 | 7.171528354 | 7.312481161 |
| 6.941757982 | 7.124391016 | 6.518902952 |
| 7.583032708 | 7.092411848 | 6.812310116 |
| 6.44370683  | 7.731115326 | 6.464227951 |
| 6.912916322 | 7.994346964 | 6.871793271 |
| 8.841686486 | 7.372647313 | 8.162715287 |
| 7.660215653 | 7.394168584 | 7.797325584 |
| 6.762281682 | 7.525803124 | 7.15993557  |
| 6.503663519 | 6.614754339 | 6.824291108 |
| 6.548059766 | 6.554637214 | 7.118697382 |
| 7.666903121 | 7.296329488 | 6.989118079 |
| 6.630534894 | 6.878595909 | 7.020424818 |
| 7.264680742 | 6.690204436 | 7.085553116 |
| 6.568974475 | 7.179587047 | 6.411757184 |
| 7.139846226 | 6.536001678 | 6.915192035 |
| 6.918817743 | 6.94109978  | 7.728649348 |
| 6.887521643 | 6.88020556  | 7.284312254 |
| 8.32448551  | 7.12186323  | 7.921014823 |
| 7.362082554 | 6.429614639 | 6.582016905 |
| 8.217270458 | 6.453288143 | 7.210894704 |
| 7.174034494 | 7.076940905 | 7.107111511 |
| 7.0766839   | 7.063732587 | 7.984023472 |
| 7.208219107 | 6.475021807 | 7.246216454 |
| 6.614128049 | 6.557536387 | 6.971178042 |
| 7.368466377 | 6.904787345 | 6.943318879 |
| 7.537129992 | 7.831721808 | 6.923408816 |
| 6.659223891 | 6.503135554 | 7.288639331 |
| 6.892658087 | 7.623957181 | 6.894322531 |
| 7.754721188 | 7.035602785 | 7.387650304 |
| 7.111256781 | 6.375488736 | 6.513418587 |
| 6.794976431 | 6.762669072 | 6.938952263 |
| 7.18544014  | 6.740920989 | 7.281452299 |
| 7.181496611 | 6.662312988 | 6.775782327 |
| 7.735764264 | 6.922420321 | 7.404031699 |
| 6.773103169 | 7.512588342 | 6.536479745 |
| 7.828651682 | 7.189685781 | 8.334044193 |
| 6.617913863 | 6.640171822 | 7.182231347 |
| 6.785193246 | 7.798336604 | 8.242243646 |
| 6.492104263 | 7.220528889 | 6.984323953 |
| 6.704352955 | 7.14806262  | 7.312045121 |
| 7.484205411 | 6.854001486 | 7.768727264 |
| 7.017495765 | 6.418820062 | 7.896927854 |

|             |             |             |
|-------------|-------------|-------------|
| 8.044397862 | 6.759441469 | 6.793231689 |
| 6.666697679 | 7.136598571 | 8.425159028 |
| 6.944933054 | 6.390348873 | 6.559415556 |
| 7.279106593 | 6.386172785 | 7.176768501 |
| 7.649966541 | 6.505229997 | 6.608132931 |
| 6.387872103 | 7.040138023 | 6.981993968 |
| 6.941400002 | 6.565465853 | 6.595359008 |
| 6.471051392 | 6.983567352 | 7.406037043 |
| 6.596258396 | 7.571855969 | 6.556544435 |
| 6.772437721 | 7.075312525 | 6.524082754 |
| 7.520001136 | 6.555459095 | 7.645348426 |
| 6.992503108 | 7.074331064 | 6.974801564 |
| 7.466373169 | 6.384075018 | 6.971874437 |
| 8.304241042 | 6.656951546 | 7.115002743 |
| 7.368763429 | 6.363734768 | 7.752647872 |
| 6.478317045 | 7.546297678 | 7.245774277 |
| 7.503303472 | 6.4212631   | 7.529529501 |
| 7.471904614 | 6.552189727 | 6.860837089 |
| 7.503323962 | 7.851597429 | 6.409241506 |
| 6.682921457 | 7.399647078 | 7.414575577 |
| 7.053528223 | 6.386165916 | 6.813457457 |
| 7.207700016 | 6.852989353 | 7.266367363 |
| 7.108681569 | 6.523213074 | 6.982773474 |
| 8.108368798 | 6.891169992 | 8.188450651 |
| 10.21627095 | 6.417518541 | 8.287419455 |
| 6.805526854 | 6.560310587 | 6.81998783  |
| 7.080572258 | 6.640807831 | 7.304576068 |
| 6.347787388 | 6.996963189 | 7.205844883 |
| 7.266049484 | 6.510247665 | 6.686413594 |
| 6.818571794 | 6.385731785 | 6.517716894 |
| 6.479019766 | 6.976382361 | 6.422404031 |
| 7.733200894 | 6.717295887 | 7.016678397 |
| 7.982859265 | 7.316933745 | 8.146592443 |
| 6.884237431 | 7.255121914 | 6.913012688 |
| 6.327389325 | 6.743731502 | 6.816844451 |
| 6.72813567  | 6.452401115 | 6.501957626 |
| 6.436824964 | 6.907202678 | 7.292372189 |
| 7.061996718 | 7.149035267 | 6.649641816 |
| 7.607920854 | 6.876435119 | 6.94510997  |
| 6.964043856 | 6.336013249 | 6.614904643 |
| 6.760641558 | 6.517016572 | 6.364385356 |
| 8.90246625  | 8.015535599 | 7.759979366 |
| 7.062052463 | 6.497974743 | 7.725708798 |
| 7.130504916 | 7.269622427 | 7.135192891 |
| 6.946425039 | 6.995316378 | 7.14737996  |
| 8.197123184 | 7.020042102 | 7.774126262 |

|             |             |             |
|-------------|-------------|-------------|
| 7.03352592  | 6.361872909 | 6.570691914 |
| 6.431251915 | 6.873575965 | 6.604220893 |
| 6.972727802 | 7.259569322 | 7.795795284 |
| 7.362565664 | 6.969734675 | 7.329802481 |
| 7.109950086 | 6.745228944 | 8.255502167 |
| 7.108633447 | 6.7001736   | 8.191488252 |
| 7.243540317 | 6.908851998 | 7.037084214 |
| 6.352593848 | 6.321231979 | 6.588411326 |
| 7.110575394 | 6.461067276 | 6.587614605 |
| 6.786741796 | 6.704334607 | 6.980345921 |
| 6.641817474 | 7.038469538 | 6.290263954 |
| 8.169884118 | 7.467870781 | 8.171913225 |
| 7.806500588 | 7.098444515 | 6.282884519 |
| 7.570010119 | 7.338635158 | 6.981447815 |
| 6.76497457  | 6.296477264 | 7.379555895 |
| 6.986555866 | 6.297520272 | 6.33871008  |
| 6.804794206 | 7.406204844 | 6.733044538 |
| 6.39306839  | 7.007173306 | 6.740384354 |
| 6.704087238 | 7.812746209 | 7.792582195 |
| 7.272762175 | 7.609114965 | 7.471642946 |
| 8.336870157 | 7.899796301 | 7.496680712 |
| 6.879151987 | 7.856931523 | 7.019836568 |
| 6.350807896 | 6.612649723 | 6.734109742 |
| 7.098513044 | 6.951039731 | 7.279744095 |
| 6.466166774 | 6.413833407 | 6.275174413 |
| 7.32347036  | 6.878066383 | 7.165743101 |
| 7.350111617 | 6.309602075 | 7.3915143   |
| 7.046872608 | 6.739293039 | 7.240357372 |
| 6.485977338 | 6.965210104 | 6.698576799 |
| 7.239651288 | 6.32297926  | 7.021857018 |
| 6.770570707 | 6.580821477 | 7.073206704 |
| 7.444518658 | 6.366976315 | 7.176141234 |
| 7.016681415 | 6.30355811  | 7.318048749 |
| 7.293005211 | 7.439322915 | 7.090697796 |
| 6.28262779  | 6.703585308 | 7.391558183 |
| 6.299655939 | 6.644768151 | 6.878464367 |
| 7.405096728 | 6.259158357 | 6.513437613 |
| 6.383855465 | 6.527591695 | 6.574855752 |
| 7.365077562 | 6.841542831 | 6.734353819 |
| 7.35247512  | 6.404259916 | 6.658721948 |
| 7.252531238 | 6.309901026 | 7.211135793 |
| 6.353663865 | 6.446385558 | 6.559923643 |
| 6.48017187  | 6.507746777 | 6.871750364 |
| 6.348254106 | 6.271327021 | 6.566317053 |
| 6.39203789  | 7.035727795 | 6.745292547 |
| 6.455750322 | 6.745047913 | 7.14993348  |

|             |             |             |
|-------------|-------------|-------------|
| 6.933183909 | 7.103005239 | 6.545722863 |
| 7.669894891 | 6.718234521 | 6.878762598 |
| 6.271775395 | 6.431289644 | 7.014996472 |
| 6.332296488 | 6.983619089 | 6.34746599  |
| 8.313979931 | 6.970500317 | 8.151535273 |
| 7.296226773 | 6.319662734 | 6.297728179 |
| 7.356462561 | 6.83168409  | 6.870683608 |
| 7.407906952 | 6.944734388 | 7.280872962 |
| 6.60994201  | 6.486266787 | 6.990924077 |
| 6.406863632 | 6.639558091 | 6.751671819 |
| 6.85219693  | 6.460528425 | 6.933212952 |
| 7.279641271 | 9.315654432 | 8.434211975 |
| 6.844708951 | 6.794399093 | 7.440356244 |
| 7.909437933 | 8.839759382 | 8.653701219 |
| 6.720597693 | 7.230982464 | 6.233117636 |
| 6.289881829 | 7.825914505 | 9.015844185 |
| 7.242270788 | 6.528593344 | 7.34734056  |
| 7.73805381  | 7.12306542  | 6.290225417 |
| 6.44447297  | 7.105025393 | 6.606720983 |
| 7.200091876 | 7.041064328 | 6.789307511 |
| 9.887282485 | 9.202278276 | 9.555601181 |
| 7.665100681 | 7.196507417 | 6.373217803 |
| 8.703088899 | 6.32176729  | 7.91678148  |
| 7.284743759 | 6.440638515 | 7.316217467 |
| 6.890374209 | 6.316769788 | 6.454182535 |
| 6.782909951 | 6.413747533 | 6.874410688 |
| 10.07058828 | 8.771836419 | 8.634301657 |
| 7.240458941 | 6.279711592 | 7.140743172 |
| 6.644848381 | 7.100477677 | 7.331923463 |
| 7.387305874 | 6.916086359 | 6.889139086 |
| 6.304184442 | 6.785954823 | 6.242529056 |
| 7.391517402 | 6.500692945 | 6.299785106 |
| 6.948587577 | 6.738532459 | 7.293687991 |
| 7.776636666 | 7.234145331 | 7.879074238 |
| 6.224669448 | 6.296132663 | 6.910251192 |
| 7.848281225 | 6.739868537 | 7.11723572  |
| 8.052128693 | 8.353999669 | 7.575242549 |
| 7.356516249 | 6.275022518 | 8.820240682 |
| 6.245818071 | 6.994057586 | 6.850824172 |
| 7.090127938 | 7.375479438 | 7.493079481 |
| 7.224288617 | 6.254183264 | 6.966840777 |
| 7.42411731  | 7.530989073 | 6.992182806 |
| 6.915431774 | 6.292482765 | 7.107497867 |
| 6.923727714 | 6.283507276 | 7.560776233 |
| 6.631729547 | 6.350816784 | 6.437050691 |
| 6.96305849  | 6.221191593 | 6.586585394 |

|             |             |             |
|-------------|-------------|-------------|
| 6.406934548 | 7.87516161  | 8.513269794 |
| 6.615034207 | 6.631271404 | 7.611132473 |
| 7.249255761 | 8.511611449 | 7.475747186 |
| 7.766147929 | 6.599467869 | 6.66819968  |
| 6.189319751 | 6.192038034 | 7.697337953 |
| 7.405361842 | 6.534849795 | 7.536222514 |
| 6.238818171 | 7.188298868 | 7.597449308 |
| 7.302368687 | 6.890008612 | 6.896392273 |
| 7.48395664  | 6.325546193 | 6.710459015 |
| 7.109503901 | 6.460628516 | 7.080493095 |
| 6.727206033 | 6.184270118 | 6.750138457 |
| 6.864130448 | 7.381990797 | 6.487135854 |
| 6.221768108 | 6.321177939 | 6.55017158  |
| 6.526737765 | 6.633831208 | 7.111218515 |
| 6.551686545 | 6.942799707 | 6.491517408 |
| 6.86838756  | 6.688938218 | 7.233992815 |
| 6.534664381 | 7.085666728 | 7.271720439 |
| 6.171794096 | 6.688416848 | 7.119539701 |
| 6.66103394  | 6.407568298 | 7.350926024 |
| 6.354236607 | 7.565311117 | 7.727167813 |
| 8.132781129 | 7.232031625 | 7.426250438 |
| 7.107349693 | 8.301050096 | 6.612514258 |
| 7.948606386 | 6.4072539   | 7.21092427  |
| 6.48298179  | 7.791490796 | 6.383295799 |
| 8.108768211 | 6.467074812 | 8.470302135 |
| 6.34791192  | 6.56937463  | 6.580408214 |
| 6.82640138  | 6.973609571 | 6.169247515 |
| 6.472499878 | 6.868145241 | 7.171982323 |
| 6.783115271 | 6.972220363 | 7.26116235  |
| 6.859826989 | 6.462745661 | 6.1924728   |
| 6.389799249 | 7.411632185 | 7.046154351 |
| 7.209421159 | 7.033471506 | 7.698111886 |
| 6.503109788 | 7.094434675 | 6.235650134 |
| 7.564652839 | 6.211178723 | 7.466765056 |
| 6.690088464 | 6.218117587 | 6.374088289 |
| 6.773292028 | 7.405231203 | 6.464057065 |
| 7.049619175 | 6.267588379 | 6.821292632 |
| 6.650685659 | 6.942793678 | 6.471371618 |
| 6.719178559 | 6.680377507 | 6.455964377 |
| 6.946498556 | 6.441734026 | 6.474072274 |
| 7.612907982 | 6.694885633 | 7.011774734 |
| 7.058386529 | 7.053522214 | 6.183795332 |
| 7.53928584  | 6.366373082 | 7.340931918 |
| 7.070897187 | 7.46686378  | 6.338121011 |
| 6.879136475 | 6.213684851 | 7.017667095 |
| 6.397856037 | 6.369079103 | 6.320055876 |

|             |             |             |
|-------------|-------------|-------------|
| 6.472068083 | 6.853068205 | 6.348119515 |
| 6.698209528 | 7.8968124   | 7.523834404 |
| 6.835613371 | 6.563491264 | 6.706950643 |
| 6.375346139 | 6.800748142 | 6.971234235 |
| 6.628686864 | 6.436830346 | 6.593208751 |
| 6.307666351 | 6.690746288 | 6.594887792 |
| 6.733927483 | 7.064366688 | 7.573843095 |
| 7.783252267 | 7.957265176 | 7.094386528 |
| 8.162413494 | 8.743592933 | 7.945334558 |
| 7.389145166 | 6.829160891 | 7.227030943 |
| 7.872623899 | 7.374555638 | 6.640938899 |
| 6.519657191 | 6.214451254 | 6.511320068 |
| 7.051428184 | 6.250198072 | 6.476378096 |
| 6.137006584 | 6.792588512 | 6.713822825 |
| 6.559386195 | 6.182200969 | 6.90618013  |
| 8.861174051 | 8.439553611 | 8.917948069 |
| 7.389241286 | 6.22112476  | 7.092629313 |
| 7.769972306 | 7.343828445 | 7.770393897 |
| 6.568003747 | 7.883797661 | 8.276289561 |
| 6.263794832 | 6.382351069 | 6.708108129 |
| 6.981764185 | 6.341108477 | 6.592860458 |
| 6.788464973 | 6.422331433 | 6.840334296 |
| 6.498907983 | 6.31018929  | 6.807822134 |
| 6.172399658 | 7.420671482 | 7.013869094 |
| 7.111340209 | 6.331762098 | 7.436550773 |
| 7.239088245 | 6.236194401 | 6.337213345 |
| 6.564286211 | 7.140000698 | 7.832968726 |
| 7.921851293 | 8.163992559 | 6.386965419 |
| 6.351926874 | 6.616585534 | 6.913174615 |
| 7.765158031 | 7.23189705  | 7.346721474 |
| 7.265274914 | 6.889783695 | 7.66827867  |
| 7.010050291 | 6.279486845 | 7.475879235 |
| 7.108786008 | 6.868495646 | 7.09950746  |
| 6.138228696 | 7.368044869 | 6.543534866 |
| 7.763319106 | 6.81717554  | 7.963644508 |
| 7.202926384 | 6.954174764 | 6.667529248 |
| 6.563547908 | 6.178539301 | 6.17277154  |
| 6.585461888 | 7.785644575 | 7.187435984 |
| 6.816138765 | 7.102027432 | 7.330584705 |
| 6.954115851 | 7.233066917 | 7.892078161 |
| 6.107704632 | 6.267188556 | 6.547053388 |
| 6.242296938 | 6.355649967 | 7.014645819 |
| 7.209256174 | 6.145515831 | 7.016721752 |
| 7.384336237 | 6.208457032 | 7.982962833 |
| 7.447117911 | 7.525651248 | 6.8364865   |
| 6.11516492  | 6.63414143  | 6.572453261 |

|             |             |             |
|-------------|-------------|-------------|
| 7.512552764 | 7.442761743 | 6.948349839 |
| 7.53970302  | 6.718995325 | 7.135584039 |
| 6.581499415 | 6.440047193 | 6.373405245 |
| 6.765756968 | 6.773950557 | 7.152202477 |
| 7.680119971 | 7.316477468 | 6.533625436 |
| 6.279637954 | 7.243894281 | 7.255955812 |
| 7.071332324 | 6.667830051 | 6.642870357 |
| 6.459948158 | 6.190936132 | 6.332555089 |
| 6.947566619 | 6.182701132 | 6.430596211 |
| 6.779857452 | 6.127949011 | 6.445373107 |
| 6.61376491  | 6.886472016 | 6.398245351 |
| 6.562727132 | 7.215064591 | 6.57239217  |
| 6.433770607 | 6.359207734 | 6.570916616 |
| 8.510096353 | 8.380476656 | 8.202008836 |
| 6.472707783 | 6.604822412 | 6.367114227 |
| 6.258684908 | 6.301386446 | 6.133401801 |
| 6.12040695  | 6.813905588 | 7.517154084 |
| 7.749275034 | 6.250141792 | 6.991383999 |
| 6.630580482 | 6.661979425 | 6.413976038 |
| 6.171788794 | 6.076398011 | 6.416273443 |
| 6.192993422 | 6.101002014 | 6.506787721 |
| 6.288438156 | 6.531031519 | 7.092776165 |
| 6.562339453 | 6.684571526 | 6.116143786 |
| 6.548441375 | 6.177636832 | 7.17695369  |
| 6.619956789 | 6.393993719 | 6.756829082 |
| 6.799898377 | 7.387414281 | 6.19238551  |
| 6.089480628 | 7.189738959 | 7.074688167 |
| 7.59264968  | 7.536412033 | 7.47219681  |
| 6.89244308  | 7.274584359 | 7.405548883 |
| 6.119145    | 7.881222408 | 7.30975014  |
| 7.580721908 | 7.056174432 | 7.46266806  |
| 6.851313427 | 6.187473351 | 7.226667505 |
| 6.095420555 | 6.176697738 | 6.713421797 |
| 9.743690719 | 7.901472393 | 7.934971864 |
| 6.262419704 | 6.215345572 | 6.44013599  |
| 7.380205631 | 6.283044194 | 6.564311328 |
| 6.15471074  | 7.079688602 | 6.432899933 |
| 6.133484997 | 6.340928093 | 6.91133322  |
| 6.589408028 | 6.77742454  | 7.194455991 |
| 6.355093469 | 6.12633112  | 7.167710924 |
| 6.569169907 | 6.050864802 | 6.228877361 |
| 6.483555406 | 6.284464227 | 6.599710107 |
| 6.569969243 | 6.522308383 | 6.10640812  |
| 7.0635273   | 7.246301034 | 7.847210633 |
| 7.006866222 | 6.895538604 | 6.313579101 |
| 6.339432963 | 7.041009957 | 6.130857122 |



|             |             |             |
|-------------|-------------|-------------|
| 7.184066719 | 7.198085585 | 7.056840499 |
| 6.430530237 | 7.531447887 | 6.222146963 |
| 7.517341271 | 7.448850591 | 7.205703877 |
| 6.882794371 | 6.051421358 | 7.205131495 |
| 6.295101173 | 6.220385258 | 7.928885964 |
| 6.382627239 | 6.179040279 | 7.002732635 |
| 6.395446391 | 6.279398914 | 6.045302016 |
| 7.041354012 | 6.830141845 | 6.297889177 |
| 6.500448983 | 7.38277526  | 7.221747814 |
| 7.211980419 | 6.508566826 | 7.130500694 |
| 7.932334264 | 7.41242377  | 7.484652568 |
| 7.986668594 | 6.127208032 | 6.539095905 |
| 6.764262648 | 6.428735627 | 6.101611768 |
| 6.547974456 | 7.140016872 | 8.175645032 |
| 7.165534314 | 6.515728184 | 6.192386747 |
| 6.20936248  | 6.687061096 | 7.254142535 |
| 6.34940484  | 6.330080992 | 6.060945219 |
| 6.159525025 | 6.138925405 | 6.024963575 |
| 6.465169437 | 6.53182939  | 6.795281255 |
| 6.508290215 | 6.167078089 | 6.928296011 |
| 7.204074725 | 6.695100779 | 7.214646834 |
| 6.876194316 | 6.054583537 | 6.999958193 |
| 7.206995686 | 7.170012902 | 7.15894102  |
| 6.933559075 | 6.222464354 | 6.035355227 |
| 6.113690424 | 6.287019785 | 6.213274339 |
| 6.749547342 | 7.309041309 | 7.036445976 |
| 6.359578978 | 6.503280965 | 6.108747974 |
| 6.934846979 | 7.101659317 | 6.909677103 |
| 7.014923937 | 6.062406337 | 6.285967759 |
| 8.577094951 | 6.106099417 | 6.886266831 |
| 7.036275278 | 6.24747089  | 6.267829219 |
| 6.32663582  | 6.848649511 | 6.098034286 |
| 7.05543576  | 7.162219839 | 6.639858302 |
| 7.62616883  | 7.486256446 | 7.379670314 |
| 6.410302124 | 6.178907698 | 6.627851768 |
| 6.908047769 | 6.724846645 | 6.892950747 |
| 6.600756898 | 6.215274175 | 6.516624156 |
| 7.71882949  | 7.881451831 | 6.523171202 |
| 6.59986337  | 6.383929536 | 6.078640142 |
| 9.907723689 | 8.481615131 | 8.265424113 |
| 7.58323459  | 7.074991062 | 6.080799202 |
| 6.671419968 | 5.994492871 | 6.838185734 |
| 6.621776003 | 6.75769608  | 7.565302809 |
| 6.025194935 | 6.542768266 | 6.641733229 |
| 6.352327574 | 6.342811147 | 6.788621901 |
| 6.517578234 | 6.642108309 | 6.09630564  |

|             |             |             |
|-------------|-------------|-------------|
| 6.170058909 | 6.769894368 | 6.630922611 |
| 8.254745719 | 7.005522031 | 7.812861078 |
| 6.758579895 | 8.145847898 | 6.490490971 |
| 6.756655881 | 6.63729404  | 6.657484674 |
| 7.351561811 | 6.355670982 | 7.845797914 |
| 6.814386506 | 6.248171958 | 6.088272311 |
| 6.478317971 | 6.476455516 | 6.489932604 |
| 6.230997904 | 6.328659314 | 6.827672158 |
| 6.60749909  | 6.77919577  | 6.083967959 |
| 6.761232545 | 7.146800726 | 6.00777618  |
| 6.759699088 | 6.642524633 | 6.557128525 |
| 6.459299544 | 6.152833561 | 6.29354623  |
| 6.042966147 | 6.837112939 | 6.539900502 |
| 7.073936896 | 6.090100114 | 6.224280938 |
| 6.726022823 | 6.598195444 | 7.035738535 |
| 6.899029929 | 6.590011165 | 7.261100455 |
| 7.152443433 | 6.262645662 | 6.875986463 |
| 7.123990107 | 7.092663166 | 7.838861424 |
| 6.94958329  | 6.835709545 | 6.825151067 |
| 6.67889309  | 6.034667135 | 6.381618559 |
| 6.185221418 | 6.115161393 | 6.503694623 |
| 7.551432742 | 7.190101474 | 7.352985583 |
| 7.340125471 | 6.951340959 | 7.772416617 |
| 6.948378164 | 7.631503637 | 7.420886818 |
| 6.139804957 | 6.072227316 | 5.98684528  |
| 7.219867754 | 6.584309075 | 7.291238351 |
| 6.429878556 | 6.446982564 | 7.217903514 |
| 7.323773006 | 6.768671902 | 6.860360165 |
| 7.83080719  | 6.677827085 | 6.859538358 |
| 6.023949547 | 6.624691619 | 6.947675095 |
| 6.212255958 | 6.25561998  | 6.089846982 |
| 6.832703566 | 6.379101385 | 6.044320869 |
| 6.047811713 | 6.034336301 | 6.373952608 |
| 6.37260386  | 6.273312186 | 6.265809432 |
| 6.050779097 | 6.057139996 | 6.05840775  |
| 6.806927929 | 6.392876435 | 6.112353631 |
| 6.760264467 | 6.68264043  | 6.350496664 |
| 6.568849485 | 5.976306277 | 6.719875654 |
| 6.024239259 | 6.233291393 | 6.759538587 |
| 7.076020096 | 6.097252374 | 6.594120505 |
| 6.323689122 | 7.048447104 | 7.373161903 |
| 6.062901542 | 7.742552886 | 6.354808317 |
| 6.17853813  | 7.680848409 | 6.176209911 |
| 6.533272315 | 6.078320919 | 6.045512273 |
| 6.569487632 | 6.055703434 | 6.233822405 |
| 7.701846623 | 6.279106333 | 6.794135973 |

|             |             |             |
|-------------|-------------|-------------|
| 6.972309071 | 5.975916898 | 6.651511031 |
| 6.524400016 | 6.132638846 | 6.041725199 |
| 6.394126516 | 6.671830199 | 7.211555906 |
| 6.928113278 | 6.635213413 | 7.148765413 |
| 6.175344382 | 6.841280811 | 6.08678815  |
| 6.336700145 | 5.985855701 | 6.369161797 |
| 6.234188387 | 7.042055379 | 7.505557946 |
| 7.413111078 | 8.166171723 | 7.505664165 |
| 8.148390447 | 6.888016843 | 7.533135171 |
| 6.569160183 | 7.631028962 | 6.680715578 |
| 7.411643188 | 8.388358652 | 6.96996198  |
| 6.769635178 | 6.758256344 | 6.24465018  |
| 6.340873838 | 6.779117594 | 6.271930153 |
| 6.416379637 | 6.035924934 | 6.891363672 |
| 7.93021835  | 6.001969067 | 6.837013496 |
| 6.49019982  | 5.993045437 | 6.016842813 |
| 6.847614901 | 7.18759176  | 6.711184399 |
| 6.697405451 | 5.998849258 | 7.554975802 |
| 6.025605912 | 6.569434412 | 7.383768641 |
| 6.00891494  | 6.409771742 | 6.035217112 |
| 8.337561893 | 6.940074774 | 6.13851814  |
| 6.631787656 | 6.534449285 | 6.204948186 |
| 6.108127565 | 6.336822267 | 6.054605687 |
| 6.33584007  | 5.940040689 | 6.467148342 |
| 6.74034697  | 6.597506571 | 7.019803328 |
| 6.223821266 | 7.611889584 | 7.9704897   |
| 6.60712389  | 6.255759462 | 6.567793016 |
| 6.468840082 | 6.145017478 | 6.109950512 |
| 6.772577149 | 6.319566252 | 6.483547561 |
| 6.645340011 | 6.340744363 | 6.520518381 |
| 6.364216451 | 6.174554131 | 6.420947312 |
| 6.977513583 | 6.031574583 | 6.878220973 |
| 8.23527367  | 7.457831316 | 7.158938058 |
| 6.64893192  | 6.021609457 | 6.939377906 |
| 6.355295874 | 6.692334513 | 6.519574757 |
| 6.057198933 | 6.132457521 | 6.199285157 |
| 6.438772341 | 6.029149232 | 6.202634439 |
| 6.526787312 | 6.106678843 | 6.592540248 |
| 7.916013347 | 6.897658489 | 7.863410305 |
| 7.181766223 | 7.63389938  | 6.801504257 |
| 7.050056808 | 8.330344315 | 6.441153777 |
| 6.540202233 | 6.17821712  | 6.190341454 |
| 6.442431319 | 6.638388001 | 7.113771062 |
| 6.333001895 | 5.941104907 | 7.175282372 |
| 7.277596065 | 6.27222176  | 7.000888753 |
| 7.714337049 | 8.73381673  | 8.897770829 |

|             |             |             |
|-------------|-------------|-------------|
| 7.305038543 | 6.788891594 | 7.481699228 |
| 5.941181425 | 6.473400693 | 6.389373525 |
| 7.541955166 | 7.28880512  | 6.750454659 |
| 6.879544621 | 6.229193254 | 6.450196681 |
| 7.139231852 | 6.32901167  | 7.133144409 |
| 6.388689259 | 6.912755669 | 6.081162255 |
| 6.364299124 | 5.929910501 | 6.319083861 |
| 6.426081738 | 6.350284477 | 6.674471612 |
| 6.85785608  | 6.859861457 | 6.048933884 |
| 6.856710125 | 6.61440612  | 7.295887279 |
| 7.130311815 | 5.957396177 | 6.231566395 |
| 6.0152487   | 6.808953031 | 7.123787433 |
| 7.683814083 | 7.404840996 | 8.189247313 |
| 6.085815939 | 7.081092707 | 6.123664747 |
| 6.976145326 | 6.209508331 | 5.98798633  |
| 6.569164375 | 6.20023506  | 7.089695393 |
| 6.827397912 | 6.402506572 | 6.577852413 |
| 6.854977156 | 6.150928854 | 7.162732809 |
| 6.150014343 | 6.544249084 | 6.679144929 |
| 6.989634001 | 6.469846783 | 6.271077067 |
| 5.976853288 | 6.500463391 | 6.432094633 |
| 6.653414633 | 6.011567437 | 6.445464617 |
| 6.366881579 | 5.89713653  | 7.518247875 |
| 6.787527196 | 6.472874391 | 5.952249788 |
| 6.756710232 | 5.99819956  | 6.281901273 |
| 6.562022724 | 6.005136877 | 6.181242272 |
| 6.513184595 | 6.625097266 | 6.517320804 |
| 6.071933036 | 7.029657089 | 6.526379133 |
| 7.718416496 | 7.430679772 | 7.000343081 |
| 7.125392314 | 6.192864854 | 6.166112278 |
| 6.510227585 | 6.805764593 | 5.957748608 |
| 7.367199469 | 5.936576107 | 6.548870394 |
| 6.347326229 | 7.770478591 | 6.877676881 |
| 6.77643969  | 6.825989922 | 6.239279917 |
| 7.361464925 | 6.341134188 | 7.156940723 |
| 6.362431774 | 6.436742234 | 6.74202854  |
| 6.249640502 | 6.331108313 | 6.629617905 |
| 7.027597053 | 6.37015966  | 6.652698391 |
| 6.374259132 | 6.083182149 | 6.159680884 |
| 6.253834397 | 6.370168656 | 6.675349905 |
| 6.003645119 | 6.106645398 | 6.971088967 |
| 7.193018839 | 6.596602649 | 5.956230673 |
| 6.511813896 | 6.019464689 | 6.670254093 |
| 6.441970476 | 5.91063596  | 6.009707831 |
| 7.10091838  | 5.936135055 | 7.21040413  |
| 6.617445942 | 6.440968181 | 5.927973598 |

|             |             |             |
|-------------|-------------|-------------|
| 5.921084576 | 5.989661258 | 8.890099532 |
| 6.464786359 | 5.892266351 | 6.683272486 |
| 6.794127898 | 6.065671092 | 6.142914973 |
| 6.306341714 | 5.953869515 | 6.106473845 |
| 7.0470255   | 6.29220283  | 7.173470106 |
| 6.694350176 | 6.34514115  | 6.911511422 |
| 7.699547741 | 7.064503142 | 6.896108991 |
| 6.985444873 | 7.389035    | 6.922582552 |
| 7.696533236 | 6.347205057 | 6.3694495   |
| 6.656859706 | 6.513662916 | 7.068662268 |
| 6.253703653 | 6.124269467 | 5.909984933 |
| 6.749596067 | 7.2510867   | 5.970157167 |
| 7.07639797  | 6.476989579 | 6.450344404 |
| 5.877366639 | 6.511564934 | 6.311238307 |
| 6.512510023 | 6.143461796 | 6.238601531 |
| 6.409828851 | 6.268814473 | 6.61346784  |
| 6.577566989 | 6.08521975  | 7.303334896 |
| 6.494290617 | 6.179773431 | 6.577207471 |
| 6.366503345 | 6.415501432 | 5.986680509 |
| 6.832740229 | 6.209039738 | 6.376210373 |
| 6.523935331 | 6.051241938 | 6.1895472   |
| 7.862567519 | 5.939730755 | 6.394335844 |
| 5.969816572 | 6.558199626 | 6.768671762 |
| 6.296490604 | 6.562439362 | 7.278868999 |
| 7.053406833 | 6.441937827 | 6.619687909 |
| 6.593262096 | 6.03295197  | 6.164973013 |
| 7.07903689  | 6.008365377 | 7.730423384 |
| 6.165934224 | 5.939508399 | 6.0078929   |
| 6.694095316 | 6.363038451 | 6.105862655 |
| 6.041134564 | 6.168166838 | 6.257312357 |
| 6.279579449 | 6.752312989 | 7.762504889 |
| 5.940610987 | 7.19932835  | 7.009766107 |
| 8.263459033 | 8.562872795 | 6.844334803 |
| 6.155612964 | 7.258944722 | 6.858808246 |
| 6.161052501 | 6.592553161 | 6.116076326 |
| 7.347011386 | 6.438854822 | 6.726113492 |
| 5.919060872 | 6.169593166 | 6.514356437 |
| 6.794229201 | 5.937037177 | 7.052154534 |
| 6.60896442  | 6.788084605 | 6.536448081 |
| 6.695625568 | 6.039599373 | 6.603585362 |
| 7.19552872  | 6.675217044 | 7.05535804  |
| 6.660109512 | 6.003874046 | 6.637572508 |
| 7.13755895  | 6.210820805 | 6.785742081 |
| 6.390084661 | 6.050074101 | 6.148347557 |
| 7.086561586 | 6.081132949 | 6.646896101 |
| 6.836351867 | 5.905647517 | 7.368155003 |

|             |             |             |
|-------------|-------------|-------------|
| 7.13754812  | 7.610184918 | 8.181322595 |
| 6.727049123 | 6.608974718 | 6.875418376 |
| 6.468965844 | 5.883432909 | 5.906923719 |
| 6.540445505 | 6.391394745 | 6.023991568 |
| 6.020839582 | 6.531029316 | 7.553753885 |
| 7.966306908 | 6.678905021 | 7.514772426 |
| 6.892442181 | 5.886019027 | 6.958641127 |
| 6.018035617 | 6.396766287 | 6.327656225 |
| 6.728918132 | 5.931211311 | 7.588165043 |
| 6.961199822 | 6.55052522  | 6.350498358 |
| 5.893294345 | 6.298627844 | 6.664554048 |
| 6.470890976 | 6.695640988 | 7.042560259 |
| 7.228331175 | 6.194160792 | 7.130338637 |
| 6.748335319 | 7.22949175  | 6.322599206 |
| 6.85827702  | 6.379658135 | 6.288036512 |
| 6.885619879 | 6.895741481 | 6.054581531 |
| 6.615064101 | 5.887372119 | 6.191514738 |
| 6.309029535 | 6.652054553 | 5.933512419 |
| 6.096500874 | 6.099922412 | 5.850133556 |
| 6.069846595 | 7.240097103 | 6.882681372 |
| 7.000241436 | 8.262891991 | 7.692128035 |
| 5.964075141 | 8.448021349 | 8.962140745 |
| 5.971488689 | 6.079241265 | 6.561166257 |
| 5.881537041 | 6.505024086 | 6.13594017  |
| 7.89844207  | 7.721367819 | 7.06943585  |
| 6.772829701 | 7.197668841 | 6.691236449 |
| 6.493986978 | 5.985340267 | 6.319497024 |
| 7.128697092 | 7.017904783 | 6.013164496 |
| 8.646591235 | 6.858324299 | 8.199052886 |
| 6.13788973  | 5.914808842 | 6.431634391 |
| 5.95757587  | 5.907848045 | 6.105541839 |
| 6.154357575 | 6.715490095 | 6.156879212 |
| 6.256321299 | 6.080884901 | 6.121996887 |
| 7.725813797 | 6.678770697 | 7.286659671 |
| 5.829189522 | 6.601643971 | 6.599874496 |
| 6.254863956 | 6.316730286 | 6.523683361 |
| 7.691561812 | 5.813601253 | 6.737880733 |
| 6.937079651 | 7.043050189 | 6.820720569 |
| 5.940269696 | 5.847210069 | 6.722694685 |
| 6.239687196 | 6.282415909 | 5.995909211 |
| 7.601961563 | 8.187449189 | 7.903580169 |
| 6.587614999 | 6.297942934 | 6.770479836 |
| 7.176219632 | 6.100461721 | 7.325047377 |
| 5.923546068 | 5.997767519 | 5.891785099 |
| 7.158924186 | 8.657418965 | 8.974345639 |
| 5.898870523 | 5.86167684  | 5.878962963 |

|             |             |             |
|-------------|-------------|-------------|
| 7.288469997 | 6.521745723 | 6.133617579 |
| 5.865522978 | 6.263451389 | 5.929279968 |
| 6.347232874 | 6.011727736 | 6.81799799  |
| 6.537736231 | 6.517757989 | 7.064823305 |
| 6.589360993 | 6.245712102 | 6.281723638 |
| 6.038883921 | 6.231596548 | 5.938612368 |
| 6.390476141 | 5.813515677 | 6.261596139 |
| 7.321059674 | 6.33732205  | 6.750833636 |
| 6.699619708 | 6.998658365 | 6.777636807 |
| 6.696908446 | 6.594146087 | 5.974435134 |
| 6.549426445 | 6.17405359  | 6.927035876 |
| 6.565101258 | 6.722812835 | 6.192243792 |
| 5.983464093 | 5.806488742 | 7.287661768 |
| 6.776325556 | 6.898894996 | 5.827163668 |
| 5.805703634 | 7.037778484 | 7.659386992 |
| 7.349253144 | 6.967235623 | 5.969905297 |
| 6.564656456 | 6.278384128 | 6.675553541 |
| 7.243398585 | 6.905899378 | 6.074581381 |
| 6.235615198 | 5.793507287 | 7.088679963 |
| 6.708834073 | 5.854709119 | 6.242886601 |
| 6.045701781 | 6.329105987 | 6.186351823 |
| 6.090464786 | 5.980905571 | 6.260830366 |
| 6.846435962 | 6.230714386 | 6.255778636 |
| 7.016499522 | 5.818371449 | 6.540779423 |
| 5.869086722 | 6.574135807 | 6.598629354 |
| 5.950637762 | 6.734044234 | 7.252312245 |
| 6.950127652 | 6.077992145 | 6.687854348 |
| 6.387286243 | 6.330832546 | 5.97581115  |
| 6.898187947 | 5.838961991 | 7.297053065 |
| 6.670793639 | 7.173404587 | 7.224852581 |
| 7.541316467 | 6.453566    | 7.421979365 |
| 8.909202635 | 8.156188901 | 8.466596308 |
| 6.115858075 | 5.872409284 | 5.878692421 |
| 6.772508958 | 6.42926604  | 6.629899491 |
| 6.425755367 | 5.782398685 | 6.489220149 |
| 6.480787161 | 6.184418004 | 5.851847956 |
| 5.77105357  | 6.359883326 | 6.328611498 |
| 7.074736972 | 5.802064544 | 6.145002937 |
| 6.395405154 | 6.452279297 | 5.920086781 |
| 7.193586009 | 6.65443345  | 6.726064611 |
| 6.248966195 | 5.977275735 | 6.368554556 |
| 5.796996167 | 5.83577119  | 5.943099596 |
| 6.090726276 | 5.871762972 | 6.269197576 |
| 6.927705395 | 7.065837838 | 7.13477627  |
| 7.087553836 | 6.509365354 | 7.267185865 |
| 7.317682948 | 5.845790653 | 6.494199298 |

|             |             |             |
|-------------|-------------|-------------|
| 5.826542258 | 8.2013557   | 6.384913589 |
| 7.869727091 | 6.686509043 | 6.85525704  |
| 6.222443423 | 5.787489143 | 6.106302304 |
| 6.652130694 | 5.834764884 | 5.972956766 |
| 7.015665663 | 6.221453674 | 6.740206372 |
| 6.979525509 | 6.534154117 | 6.25235089  |
| 6.73109278  | 6.350746402 | 7.102301276 |
| 6.837269699 | 6.148786607 | 6.259854204 |
| 6.310820513 | 5.787594117 | 5.855371942 |
| 6.099679305 | 5.788581708 | 5.780579322 |
| 6.663611674 | 5.820353876 | 6.745867892 |
| 6.224403429 | 5.82690559  | 5.844133156 |
| 6.186400288 | 5.976615917 | 5.925913041 |
| 5.904190146 | 7.24580144  | 6.374297929 |
| 7.399374078 | 6.492229844 | 7.032024611 |
| 6.28759929  | 6.39266913  | 6.054736299 |
| 7.888113983 | 7.696001931 | 8.254369773 |
| 6.439369682 | 5.919588269 | 6.032093504 |
| 6.56060313  | 5.949842262 | 5.792629577 |
| 5.829176553 | 5.993351203 | 6.080932323 |
| 6.39719036  | 6.056106515 | 5.902959432 |
| 5.881143593 | 5.804384376 | 5.937351872 |
| 7.312763113 | 6.699862794 | 5.842189141 |
| 6.124453435 | 5.951419577 | 5.814710052 |
| 6.601797393 | 5.86591932  | 6.160429815 |
| 6.461225898 | 5.927069207 | 7.144274791 |
| 6.34055962  | 6.111702121 | 6.450606581 |
| 5.844304429 | 5.879734278 | 6.828516576 |
| 5.847826077 | 6.313112006 | 6.774993971 |
| 6.267896487 | 5.763347531 | 5.850554862 |
| 6.00572472  | 5.823755476 | 6.181007739 |
| 6.842824887 | 6.890212952 | 5.950180746 |
| 6.899905328 | 5.756244252 | 7.550986336 |
| 7.138214365 | 6.838548005 | 7.014488773 |
| 6.8889924   | 6.176927142 | 6.6553862   |
| 6.632591628 | 6.620730354 | 5.885394461 |
| 6.084313182 | 5.759321591 | 7.011229848 |
| 6.248798327 | 6.006432008 | 5.86044894  |
| 6.135845914 | 6.313882444 | 5.89288273  |
| 5.869230385 | 6.154087423 | 6.020812967 |
| 6.606906808 | 6.464610025 | 5.895836176 |
| 5.741155913 | 5.873833791 | 6.515951913 |
| 6.107798253 | 5.764770364 | 6.331429976 |
| 6.837363013 | 6.244023798 | 6.344021446 |
| 6.894227809 | 5.757367069 | 6.551744993 |
| 6.337696183 | 6.294004971 | 7.402086267 |



|             |             |             |
|-------------|-------------|-------------|
| 7.017407398 | 5.968728775 | 6.319504155 |
| 6.132666224 | 6.175184762 | 6.912095512 |
| 7.486845372 | 5.830502831 | 5.790512616 |
| 6.387615638 | 6.167276482 | 6.136697862 |
| 7.338538131 | 7.19576738  | 6.224941824 |
| 5.942697634 | 5.860849442 | 6.538045399 |
| 8.085957368 | 7.009982827 | 7.125765641 |
| 5.730176284 | 6.198118662 | 6.398067646 |
| 6.739875303 | 7.357902707 | 5.827689013 |
| 7.604429508 | 7.440162636 | 8.154316325 |
| 5.981747087 | 5.783133683 | 5.941114252 |
| 6.856588825 | 6.406704193 | 5.774874422 |
| 7.4962549   | 5.898707184 | 6.06488352  |
| 5.845126238 | 5.959773581 | 5.815802562 |
| 6.397072253 | 5.857949891 | 6.946098791 |
| 6.699741969 | 6.272630167 | 5.778116734 |
| 5.727227667 | 6.508989873 | 7.040044891 |
| 6.32392283  | 6.459489552 | 6.652897097 |
| 6.253812561 | 6.994554937 | 6.673254367 |
| 6.38912521  | 6.958679128 | 7.045928352 |
| 6.399777217 | 5.969786209 | 6.397980163 |
| 6.301598324 | 5.794832582 | 6.905812475 |
| 7.199925751 | 6.420602386 | 6.072743092 |
| 6.810490037 | 5.827388074 | 6.96865854  |
| 7.148333414 | 5.980318962 | 6.825314247 |
| 6.113776729 | 5.808026675 | 6.108518773 |
| 7.000799724 | 7.473818058 | 5.786254798 |
| 6.719297328 | 6.033904832 | 6.494638381 |
| 5.908710542 | 6.155750936 | 5.829546452 |
| 6.379397296 | 5.770462482 | 6.898091431 |
| 6.745749367 | 5.856314948 | 6.453052326 |
| 6.768893265 | 5.985207431 | 6.060604263 |
| 6.605781651 | 6.559575435 | 6.306237997 |
| 6.649043834 | 5.836904763 | 5.770083227 |
| 6.740454113 | 6.132037107 | 6.264767879 |
| 6.396160043 | 6.133062614 | 6.148251678 |
| 6.7371235   | 5.794236947 | 7.089435182 |
| 5.970032127 | 5.93927305  | 6.125059543 |
| 6.291666869 | 6.472690821 | 6.55611473  |
| 6.37518544  | 6.735916805 | 5.908336628 |
| 6.884406988 | 5.707118609 | 6.861396825 |
| 6.304971743 | 5.894881902 | 6.623172276 |
| 6.328979078 | 6.768832597 | 6.94672877  |
| 6.218754164 | 6.471103131 | 6.646733745 |
| 6.205047574 | 5.688823421 | 6.167106042 |
| 6.096705959 | 6.148062623 | 5.761894038 |

|             |             |             |
|-------------|-------------|-------------|
| 6.09500683  | 6.242449466 | 5.902184943 |
| 6.424729607 | 6.019366403 | 6.558769082 |
| 6.062805193 | 5.911123835 | 5.806593506 |
| 5.774731042 | 6.376245763 | 7.927785266 |
| 6.168567186 | 7.04417307  | 6.425435602 |
| 6.597695069 | 5.817566117 | 6.526724138 |
| 7.609024348 | 6.481548452 | 7.858992791 |
| 6.529988103 | 6.084215476 | 6.137804071 |
| 6.693233903 | 6.258192667 | 6.334336401 |
| 6.750881668 | 6.645658615 | 6.769434978 |
| 6.055625568 | 7.055842302 | 6.069839105 |
| 6.641279682 | 5.875852915 | 6.709564314 |
| 5.714699769 | 7.493495137 | 7.212410065 |
| 6.538292178 | 5.767968571 | 6.743604382 |
| 6.062478607 | 5.70201318  | 6.308253763 |
| 7.001461118 | 5.916682289 | 6.177966724 |
| 6.244435402 | 5.723881217 | 5.828374213 |
| 6.616648026 | 5.787753298 | 5.896216333 |
| 6.04957786  | 6.022502575 | 5.715216109 |
| 6.161060699 | 6.982120669 | 6.684842426 |
| 5.846362487 | 5.86351817  | 5.818225928 |
| 6.571588994 | 5.707437953 | 6.094804577 |
| 5.872606978 | 5.710840574 | 6.014309702 |
| 6.245887038 | 5.820636442 | 5.868080348 |
| 6.158306402 | 6.320563455 | 5.827906883 |
| 5.902160284 | 6.595806678 | 6.527362737 |
| 6.945687453 | 6.977824786 | 7.716644012 |
| 7.093917899 | 7.030563054 | 7.098707701 |
| 6.775971063 | 5.798921121 | 5.899148991 |
| 5.836590563 | 6.439615488 | 6.504768587 |
| 5.806089496 | 6.063731597 | 6.124712618 |
| 6.097853673 | 6.998820092 | 7.62286691  |
| 6.539045098 | 5.909331688 | 6.811943804 |
| 7.100681965 | 5.993321179 | 6.773348754 |
| 7.486722276 | 6.014669575 | 6.817109646 |
| 6.003243414 | 5.816652009 | 6.557562331 |
| 8.064023464 | 8.147415675 | 6.26381832  |
| 6.780139455 | 6.631627568 | 7.1554744   |
| 6.255897203 | 6.042991853 | 6.176753241 |
| 6.685608727 | 6.672680409 | 5.780625185 |
| 6.034913687 | 5.79251076  | 5.876801946 |
| 6.687944224 | 5.726694594 | 7.353741325 |
| 5.829263106 | 7.692535814 | 5.862578    |
| 6.49016     | 6.078788214 | 5.737784937 |
| 7.027730454 | 6.056887454 | 6.449693093 |
| 6.874234824 | 6.268910819 | 7.034574686 |

|             |             |             |
|-------------|-------------|-------------|
| 7.874161695 | 7.535301709 | 8.556883941 |
| 7.17683441  | 6.291552611 | 6.21357891  |
| 7.12273441  | 6.339340635 | 5.978344749 |
| 5.776380071 | 5.981599439 | 5.772227231 |
| 6.68734461  | 5.808192181 | 5.9997077   |
| 6.398686858 | 6.131177532 | 5.72955146  |
| 6.19935097  | 6.072192875 | 5.680687172 |
| 7.462844133 | 6.75909067  | 6.55367925  |
| 6.643736336 | 5.785017948 | 6.458581582 |
| 6.318064351 | 6.67169363  | 6.06805565  |
| 6.183589448 | 6.153462183 | 6.01679646  |
| 6.692993741 | 5.686906237 | 6.517204453 |
| 5.761284385 | 6.7627591   | 6.344105594 |
| 6.68941558  | 5.737742673 | 6.250627798 |
| 5.709439623 | 8.301245812 | 8.105849542 |
| 5.89444204  | 6.409795183 | 7.42436244  |
| 6.367792354 | 6.065227419 | 5.759912724 |
| 6.268524421 | 5.781716847 | 6.595511835 |
| 7.882346694 | 6.129940719 | 5.672737448 |
| 6.00606222  | 5.721746198 | 6.668432586 |
| 6.665995789 | 6.282303437 | 6.377985638 |
| 5.992063049 | 5.940899075 | 6.211778017 |
| 6.342375595 | 6.478029318 | 5.812720805 |
| 6.910987229 | 6.925260263 | 6.417397271 |
| 6.011896208 | 7.161636752 | 6.470525739 |
| 6.535398382 | 6.380674786 | 7.029232082 |
| 7.13062179  | 5.667057738 | 6.168638136 |
| 6.01966012  | 6.011979422 | 5.654782454 |
| 6.502013146 | 6.343798789 | 5.85031923  |
| 5.872825452 | 6.231729582 | 5.88323093  |
| 5.633647804 | 6.464656823 | 6.160061161 |
| 6.094052666 | 9.290502863 | 8.590576783 |
| 6.841788242 | 6.279750941 | 5.9688754   |
| 5.861831519 | 7.358471332 | 5.885011429 |
| 6.493910429 | 5.970949069 | 6.419640973 |
| 6.354702075 | 5.770740807 | 6.661284069 |
| 6.59482175  | 6.781691794 | 6.775973961 |
| 6.704381608 | 5.763889693 | 8.19511295  |
| 7.467610431 | 5.864632903 | 5.839079382 |
| 6.579231496 | 6.113813904 | 5.846603393 |
| 6.213074792 | 5.661316332 | 7.231106268 |
| 7.630602057 | 6.072387627 | 6.34653856  |
| 7.582432108 | 6.341157378 | 5.678099039 |
| 7.442349472 | 5.721273914 | 6.282029597 |
| 6.006501057 | 7.182357057 | 7.117698532 |
| 6.055553756 | 5.809548986 | 5.939482016 |

|             |             |             |
|-------------|-------------|-------------|
| 6.267791087 | 5.967803558 | 6.411381269 |
| 7.163234669 | 6.529380876 | 6.298180648 |
| 5.896667658 | 6.068480046 | 5.98965627  |
| 7.629680704 | 6.691980406 | 7.564467253 |
| 5.81960646  | 6.232882515 | 5.680040183 |
| 6.461350175 | 5.854049846 | 6.662776163 |
| 5.822615335 | 6.578318591 | 7.273955328 |
| 5.751020059 | 6.394890643 | 6.655684642 |
| 6.578324785 | 5.797170103 | 6.733501929 |
| 8.132423936 | 7.783249202 | 7.497797675 |
| 5.678861971 | 5.924934786 | 5.930314054 |
| 6.023934379 | 6.208845163 | 6.792930962 |
| 6.605644718 | 6.623416988 | 5.936658379 |
| 5.664524086 | 6.062032764 | 5.979458024 |
| 7.576330169 | 7.239280275 | 6.395901065 |
| 6.211400327 | 5.864577193 | 6.040561802 |
| 5.960881543 | 5.998695513 | 6.849209484 |
| 6.423686722 | 5.97141735  | 5.746083121 |
| 7.194822246 | 5.799416229 | 6.133258095 |
| 6.325568477 | 5.683732348 | 6.135893262 |
| 6.82753326  | 5.704315135 | 6.407379848 |
| 5.729054154 | 5.887379148 | 5.888841678 |
| 5.710412585 | 5.986546302 | 6.450865337 |
| 6.218145169 | 6.326891808 | 5.974246371 |
| 6.848568563 | 5.667694673 | 6.519304306 |
| 7.855947774 | 6.58908132  | 6.337080408 |
| 5.882030991 | 6.38676248  | 6.205731145 |
| 5.75249757  | 5.760840347 | 5.737284314 |
| 7.181436671 | 5.95730069  | 6.00708309  |
| 6.440529958 | 5.733010584 | 6.305044033 |
| 6.776053197 | 6.506611989 | 5.696578262 |
| 6.421602089 | 6.110331306 | 6.502449201 |
| 6.630258898 | 5.897587367 | 5.84949436  |
| 5.669227673 | 5.990254838 | 6.185103016 |
| 7.052147986 | 5.675096989 | 5.875997046 |
| 5.913081732 | 6.280173818 | 5.73292144  |
| 6.172709076 | 6.001701481 | 7.07587723  |
| 6.988665466 | 7.241014953 | 6.12833081  |
| 6.174137825 | 5.776232863 | 6.524537598 |
| 6.995646731 | 5.718435927 | 5.992696681 |
| 6.267440542 | 5.915322647 | 6.503484711 |
| 5.765002134 | 6.108071929 | 6.155422407 |
| 7.081228891 | 6.400803096 | 6.672718576 |
| 5.979592817 | 5.816524137 | 6.671589875 |
| 6.152051792 | 6.105370588 | 5.93731826  |
| 8.649339436 | 6.629785623 | 5.748872694 |

|             |             |             |
|-------------|-------------|-------------|
| 6.067947956 | 6.660715573 | 6.825171805 |
| 5.618603533 | 5.982238532 | 6.419484291 |
| 6.177480438 | 5.629789624 | 6.418918305 |
| 7.19644397  | 6.554938034 | 6.331553083 |
| 5.953522857 | 5.625582662 | 5.825117547 |
| 5.911677273 | 5.623717931 | 5.801337322 |
| 6.503569174 | 6.267787787 | 6.583787577 |
| 9.162861059 | 7.978834466 | 7.968227532 |
| 6.000604797 | 6.588458865 | 6.219834133 |
| 7.073231927 | 6.478618854 | 6.63869871  |
| 6.149487564 | 7.879840188 | 6.728812593 |
| 5.717308618 | 6.338515774 | 5.698149658 |
| 5.802312572 | 6.267935951 | 6.288177027 |
| 6.038778009 | 6.378846304 | 6.378621805 |
| 6.636245024 | 6.701284633 | 6.794687384 |
| 6.517780587 | 6.161413145 | 5.883563778 |
| 8.157620968 | 7.693248511 | 7.400738048 |
| 5.86080433  | 5.801588948 | 5.857348741 |
| 6.964437614 | 6.322014898 | 6.39701091  |
| 6.250775942 | 6.672201179 | 6.525150739 |
| 6.18330567  | 6.356104912 | 5.626035274 |
| 6.481056659 | 6.449878434 | 6.508555669 |
| 6.000308294 | 6.566777968 | 6.634746689 |
| 5.695323933 | 6.134278471 | 5.964039089 |
| 6.127447168 | 5.653492575 | 6.249106347 |
| 6.299350239 | 6.070169002 | 5.988278186 |
| 6.247683191 | 5.667715633 | 5.756976854 |
| 7.092305147 | 5.950070731 | 7.985685224 |
| 7.429726997 | 6.996434254 | 7.079513268 |
| 7.055227406 | 6.926819005 | 6.33426917  |
| 6.444912983 | 5.748359135 | 6.141921532 |
| 5.848531638 | 5.658558711 | 6.03330284  |
| 5.632972961 | 5.689605462 | 8.90887612  |
| 6.569229172 | 6.417984523 | 5.878836163 |
| 6.173361342 | 5.578770153 | 6.641964675 |
| 7.187021282 | 7.027324461 | 5.842870918 |
| 6.2580677   | 6.397732182 | 6.195675163 |
| 7.775109869 | 6.675038679 | 5.5913623   |
| 5.777457135 | 6.313479929 | 6.772623881 |
| 8.533509285 | 7.139329675 | 6.246696331 |
| 6.508462756 | 5.697434081 | 6.405366886 |
| 6.107542443 | 5.765090875 | 6.697440552 |
| 5.672973884 | 5.913093661 | 6.618601141 |
| 6.903787274 | 6.240330885 | 6.329242616 |
| 5.896441376 | 6.018417597 | 6.365384599 |
| 6.240834631 | 5.641386184 | 6.804488154 |

|             |             |             |
|-------------|-------------|-------------|
| 6.236274142 | 6.444990397 | 6.479467403 |
| 6.518807946 | 5.975803465 | 6.318791499 |
| 6.919513014 | 5.57341246  | 6.045712012 |
| 6.012108568 | 5.670227862 | 5.94231075  |
| 7.786301583 | 6.08360176  | 6.255247173 |
| 6.206519433 | 5.59494017  | 6.156633503 |
| 5.973584861 | 6.026750446 | 5.860657081 |
| 6.233687901 | 6.036968221 | 5.732423589 |
| 6.247140931 | 6.114815618 | 5.9810304   |
| 6.863264006 | 6.408981092 | 5.648586621 |
| 6.178978986 | 5.924986398 | 6.517106527 |
| 5.985836357 | 6.900418369 | 5.621189581 |
| 6.591839503 | 5.595176611 | 6.649259888 |
| 6.350685713 | 6.405015931 | 6.436047743 |
| 6.381361375 | 5.64354206  | 7.003742721 |
| 6.498960554 | 5.781368962 | 5.678491311 |
| 6.021640157 | 6.458979104 | 6.25873591  |
| 6.49067532  | 6.376919792 | 6.592856338 |
| 6.117565653 | 5.992184707 | 7.068936234 |
| 6.065811413 | 6.068271167 | 5.690323086 |
| 6.462953101 | 5.90057053  | 5.698198526 |
| 6.441462337 | 5.559624535 | 6.363970631 |
| 6.121639002 | 5.852463504 | 5.574131729 |
| 6.913976523 | 5.997029793 | 5.832190227 |
| 5.903046759 | 5.824281271 | 5.858022922 |
| 6.139248767 | 5.59681472  | 6.894040289 |
| 6.920236537 | 5.661338324 | 6.830669268 |
| 5.628113146 | 6.427689854 | 6.132826165 |
| 6.774918647 | 6.433584219 | 5.621717652 |
| 7.234133148 | 6.887923593 | 5.721890585 |
| 5.915429248 | 6.061506854 | 5.634920489 |
| 6.172168404 | 6.350823072 | 6.361390383 |
| 5.863305519 | 6.511001179 | 6.085627212 |
| 6.755153117 | 5.884790175 | 6.213872547 |
| 5.985666986 | 6.561796029 | 6.529110448 |
| 5.814482921 | 5.816213655 | 6.50198993  |
| 5.99540726  | 6.576953058 | 5.87935689  |
| 6.420175504 | 6.058480631 | 6.027032861 |
| 6.88365811  | 6.562415312 | 6.728536797 |
| 5.707585462 | 6.380315577 | 6.249721155 |
| 6.162676881 | 7.070344123 | 6.124008983 |
| 6.106264221 | 6.221196095 | 5.799239642 |
| 6.278318954 | 5.84086125  | 6.366205031 |
| 6.035406805 | 6.318611959 | 5.578981408 |
| 6.782196271 | 6.402456878 | 6.598932169 |
| 6.092099932 | 6.335690716 | 5.606355809 |

|             |             |             |
|-------------|-------------|-------------|
| 6.361018677 | 7.382666283 | 6.468387861 |
| 5.806519019 | 5.97686903  | 5.802334258 |
| 6.171204083 | 6.112732587 | 6.01810009  |
| 6.648867077 | 5.847792833 | 6.097149869 |
| 7.577060538 | 6.200821967 | 6.921425126 |
| 7.180744174 | 6.439278727 | 8.024492127 |
| 7.434332205 | 6.052806147 | 6.208677629 |
| 6.328077951 | 5.547199327 | 6.530941971 |
| 5.827574676 | 6.402289458 | 6.052702076 |
| 5.576622758 | 5.734447718 | 8.003064798 |
| 6.887740986 | 6.816155549 | 6.088424128 |
| 6.447708409 | 6.142402342 | 5.956309263 |
| 5.783345987 | 6.11762375  | 5.611269147 |
| 6.185887312 | 5.5847315   | 6.275108316 |
| 6.071882092 | 6.115508789 | 5.867014779 |
| 5.943252103 | 5.640746571 | 5.64017232  |
| 6.3855286   | 5.623019697 | 6.036078164 |
| 5.870759497 | 5.587407718 | 5.831497812 |
| 6.077192589 | 8.066359796 | 7.185107992 |
| 6.804514701 | 6.184576226 | 5.786260934 |
| 5.596939777 | 5.552508406 | 5.60009489  |
| 5.552674323 | 7.708987817 | 6.992980272 |
| 6.164400065 | 5.627403198 | 6.202204857 |
| 6.514294213 | 5.54726954  | 7.04880558  |
| 5.542530487 | 7.171497592 | 8.157321942 |
| 6.019553999 | 5.88952587  | 5.556675683 |
| 5.917513476 | 5.666947434 | 5.911624798 |
| 6.391569131 | 5.748933001 | 5.796446567 |
| 6.295262776 | 5.680656774 | 5.800946747 |
| 6.002159672 | 6.299427507 | 6.32965145  |
| 6.196524346 | 5.73234407  | 6.551788562 |
| 7.19960684  | 7.509388177 | 6.703516677 |
| 6.604005451 | 5.744231702 | 6.371897985 |
| 7.972297591 | 6.477125269 | 6.114234103 |
| 6.133036212 | 5.988367864 | 5.612439619 |
| 6.015929478 | 5.541257032 | 5.942686519 |
| 6.48851138  | 6.276140364 | 5.787978739 |
| 5.634581072 | 5.55093539  | 5.779078942 |
| 6.474144956 | 6.409861067 | 5.685181969 |
| 5.728941902 | 5.659617927 | 6.09551484  |
| 6.536815537 | 5.876040985 | 6.221172805 |
| 6.524500446 | 6.302893372 | 6.502339719 |
| 6.45720406  | 7.108849289 | 6.863938223 |
| 5.989258166 | 5.572917512 | 5.998978263 |
| 6.200821441 | 6.406617709 | 6.494272021 |
| 6.469881273 | 5.683961548 | 6.30180451  |

|             |             |             |
|-------------|-------------|-------------|
| 6.338043723 | 5.680621952 | 6.054867218 |
| 8.059766583 | 5.774441109 | 7.618538139 |
| 6.160181844 | 6.108164337 | 5.638199113 |
| 6.857800872 | 6.058422361 | 7.373088804 |
| 5.602137485 | 5.823831961 | 6.834338646 |
| 6.148113623 | 5.558994942 | 5.65525019  |
| 6.619916401 | 6.884244226 | 6.408829332 |
| 5.608731939 | 7.072343994 | 7.023815656 |
| 6.793244813 | 5.524392023 | 5.901762422 |
| 5.568988852 | 6.203438765 | 5.685348557 |
| 6.317925893 | 6.750199034 | 6.703839883 |
| 6.225795629 | 5.821105585 | 6.434499228 |
| 6.198662173 | 6.15053588  | 6.10591635  |
| 5.547216312 | 6.857736121 | 6.957761464 |
| 6.164564744 | 5.632662822 | 6.816390155 |
| 6.337478819 | 5.832145508 | 6.571071259 |
| 6.662994234 | 6.328759584 | 6.037104189 |
| 6.348086151 | 5.517339216 | 5.882912017 |
| 7.225166236 | 6.68362571  | 7.019266121 |
| 5.80786432  | 6.227838443 | 6.706714164 |
| 5.958080487 | 5.638249405 | 6.104679036 |
| 5.881178687 | 5.816687417 | 7.01462241  |
| 6.275678447 | 5.641310773 | 6.217939034 |
| 5.758184701 | 5.488711276 | 5.605064088 |
| 6.697593731 | 5.781501481 | 6.377360152 |
| 6.13804837  | 5.585003487 | 5.865293539 |
| 5.701225599 | 6.382479384 | 6.61385622  |
| 6.03174985  | 5.530835369 | 6.247788283 |
| 6.634583673 | 7.348416634 | 5.821448167 |
| 5.769401933 | 5.843208711 | 6.021890583 |
| 6.344711791 | 5.560818339 | 6.144068173 |
| 6.694885535 | 6.066952878 | 5.974835584 |
| 5.901268306 | 5.688154311 | 6.199193357 |
| 7.439015879 | 7.312071769 | 6.411907422 |
| 5.905715143 | 7.441402904 | 7.999040176 |
| 6.304040363 | 5.700682696 | 5.598052289 |
| 5.681074253 | 6.345692894 | 6.516393249 |
| 5.658271764 | 6.620847244 | 6.716794351 |
| 7.527174337 | 6.72053802  | 6.883129016 |
| 6.838647306 | 5.49931019  | 6.523330715 |
| 7.958674122 | 8.394711333 | 7.259175812 |
| 6.693731597 | 5.476954997 | 5.764576781 |
| 6.080959241 | 5.898346317 | 5.550307296 |
| 6.35428098  | 5.612186535 | 5.825178473 |
| 6.519968658 | 6.222380857 | 5.525872456 |
| 6.174965523 | 6.223832426 | 5.72078006  |



|             |             |             |
|-------------|-------------|-------------|
| 6.397372528 | 6.222285751 | 5.904654649 |
| 6.614772325 | 5.948870929 | 6.741345952 |
| 5.878015821 | 5.716857739 | 6.113873121 |
| 5.920276661 | 5.677730999 | 6.526946099 |
| 6.148572317 | 5.775673973 | 5.72339006  |
| 5.997324953 | 5.834159813 | 5.622737749 |
| 5.834598084 | 5.542391658 | 6.727766927 |
| 5.872774892 | 5.669938404 | 6.346619349 |
| 6.592330385 | 5.710682115 | 6.19582774  |
| 6.140286403 | 5.594361374 | 5.485875271 |
| 5.456137827 | 6.662177405 | 5.75761719  |
| 6.483756915 | 6.177620708 | 6.204300148 |
| 6.403022144 | 6.036279688 | 5.661260357 |
| 6.409761884 | 5.855253047 | 5.628251877 |
| 5.579676885 | 6.301075967 | 6.742606804 |
| 5.750713862 | 5.686991714 | 6.03474146  |
| 6.189413103 | 5.989679344 | 5.62732939  |
| 6.741900157 | 7.17976082  | 6.982852276 |
| 6.028167101 | 5.612451883 | 5.685794948 |
| 6.041855774 | 5.5526724   | 6.571960297 |
| 6.124648323 | 5.628342005 | 5.691667428 |
| 5.862771933 | 5.55796284  | 5.823126933 |
| 6.312122214 | 5.714412282 | 6.063819758 |
| 8.062331393 | 7.59179912  | 6.74675036  |
| 6.679460567 | 6.340363401 | 7.404667891 |
| 5.803509588 | 6.586386292 | 6.669722191 |
| 6.864293908 | 5.462581672 | 6.6583508   |
| 6.666410425 | 5.534372155 | 6.620314856 |
| 5.5522178   | 6.247096031 | 6.342499201 |
| 6.459214287 | 5.75619082  | 6.021518803 |
| 5.79652013  | 5.763691519 | 5.710727801 |
| 5.721536222 | 5.523082803 | 6.501770593 |
| 5.937913122 | 5.762016193 | 5.7955959   |
| 5.518317762 | 6.490029215 | 6.208466886 |
| 5.678466675 | 6.073102396 | 5.595192617 |
| 6.764921101 | 5.490501378 | 6.757815679 |
| 6.288251306 | 5.465268046 | 6.098247154 |
| 6.135730553 | 5.84705273  | 5.610875362 |
| 6.969693634 | 6.770170487 | 6.97719004  |
| 6.113007451 | 5.496133795 | 5.773179765 |
| 6.348685904 | 6.42370429  | 6.195933772 |
| 5.766180878 | 6.722266553 | 5.82990276  |
| 5.936905696 | 5.516118615 | 5.804251241 |
| 6.457661814 | 5.490220339 | 5.707210901 |
| 6.377353233 | 5.464044753 | 5.587711983 |
| 5.7603739   | 5.944897147 | 5.492945224 |

|             |             |             |
|-------------|-------------|-------------|
| 6.259461174 | 6.146213418 | 5.565096181 |
| 5.462808074 | 5.76865813  | 5.800233544 |
| 6.436952936 | 5.818746984 | 6.065946875 |
| 5.800064466 | 5.875693943 | 5.552495644 |
| 6.465167257 | 6.907558077 | 6.998849854 |
| 5.807088199 | 6.107775952 | 5.904203935 |
| 7.317111975 | 6.246531089 | 7.443355096 |
| 6.091932341 | 5.938429772 | 6.711487185 |
| 5.514048816 | 6.171697357 | 6.367484086 |
| 5.958495495 | 5.475644029 | 6.067703449 |
| 6.518281798 | 5.576116443 | 7.137985927 |
| 6.664913906 | 6.654496208 | 7.039835288 |
| 5.559796402 | 5.577010401 | 5.967818461 |
| 6.542878594 | 6.222807699 | 6.555246863 |
| 6.755358748 | 5.997864812 | 7.249278186 |
| 5.47427223  | 6.202660047 | 6.105259627 |
| 6.531521875 | 5.785205526 | 6.355164472 |
| 5.923111524 | 5.554486791 | 5.828025124 |
| 5.762563636 | 5.51095126  | 6.612722766 |
| 6.607166341 | 6.048771626 | 6.328536911 |
| 6.18031603  | 5.687436847 | 6.286194228 |
| 5.804158348 | 6.503316689 | 6.42647135  |
| 5.464397859 | 6.110051793 | 5.603563826 |
| 8.478268951 | 7.147240114 | 8.008530025 |
| 6.165767124 | 6.075469995 | 5.525745438 |
| 6.424060205 | 6.155304872 | 6.187917841 |
| 6.273791784 | 5.900260455 | 6.203223578 |
| 6.135194927 | 6.168280494 | 6.970954525 |
| 5.530492736 | 5.586142321 | 5.639908788 |
| 5.832489439 | 6.909149412 | 5.469634597 |
| 6.396548756 | 5.492122005 | 6.14698481  |
| 5.967666877 | 5.487912053 | 5.806222177 |
| 6.461582596 | 5.853210478 | 5.434777681 |
| 6.042993268 | 5.650723945 | 5.655176177 |
| 6.463715588 | 6.35599763  | 5.647075582 |
| 5.878453555 | 5.626949161 | 6.181012035 |
| 5.493891289 | 6.263142897 | 6.264038382 |
| 5.455047445 | 6.602247452 | 5.958973081 |
| 5.880674367 | 5.836318924 | 5.995072023 |
| 7.078289793 | 6.432676067 | 5.997585306 |
| 5.98408584  | 7.065051696 | 5.95915266  |
| 5.803981992 | 7.253358605 | 6.648871824 |
| 5.436441241 | 6.048537674 | 6.370934388 |
| 7.214145974 | 6.098980748 | 6.707369816 |
| 6.195185029 | 5.704351443 | 5.872949899 |
| 6.813184766 | 5.995394841 | 5.931984959 |

|             |             |             |
|-------------|-------------|-------------|
| 6.214794399 | 5.769220674 | 6.243550629 |
| 6.045087761 | 5.471442266 | 6.734713959 |
| 5.456608344 | 5.733709025 | 5.754862356 |
| 6.913427205 | 5.483656092 | 6.443302969 |
| 5.51526052  | 6.142961999 | 5.540944153 |
| 6.001529096 | 5.926412551 | 7.054348462 |
| 5.7356444   | 5.504587159 | 5.65902476  |
| 6.420891675 | 5.708891482 | 6.042220533 |
| 6.008514974 | 5.75338967  | 5.656448411 |
| 6.081351891 | 5.422418507 | 6.036232436 |
| 6.142533993 | 5.429243143 | 5.994287573 |
| 6.137758068 | 6.576590084 | 5.984287615 |
| 5.757891578 | 6.666983703 | 6.122785532 |
| 5.635877411 | 6.103052859 | 5.778337231 |
| 6.516840139 | 6.894610867 | 5.576021637 |
| 5.448554276 | 5.404412279 | 5.841627572 |
| 5.698771178 | 5.48940303  | 6.823086067 |
| 6.079288843 | 6.135741662 | 5.518954227 |
| 6.523533939 | 5.50403963  | 6.144640561 |
| 7.110873681 | 7.168841517 | 6.364206025 |
| 5.483478622 | 5.620434109 | 5.568498346 |
| 5.446122851 | 6.090011771 | 5.784521483 |
| 6.403176431 | 6.659271247 | 6.159849965 |
| 5.689530775 | 5.880025976 | 5.554156884 |
| 5.60290615  | 6.115334793 | 6.276506527 |
| 5.421823311 | 5.798555659 | 5.615040409 |
| 6.278808818 | 6.095795997 | 5.677886963 |
| 6.015845228 | 5.856154683 | 5.658687606 |
| 5.399233221 | 5.935523493 | 7.167998073 |
| 6.105292232 | 5.537099711 | 5.782783224 |
| 6.058978278 | 5.480075356 | 5.818236845 |
| 6.490622892 | 6.583594441 | 6.902200754 |
| 6.349768798 | 5.951116725 | 6.233399271 |
| 6.113094996 | 5.439910861 | 6.044552398 |
| 5.736410174 | 5.857068586 | 6.620938166 |
| 6.519032305 | 6.651840664 | 7.016820799 |
| 7.199403757 | 6.734881334 | 5.998106717 |
| 6.465158025 | 5.979200987 | 6.40330151  |
| 5.677265783 | 5.678331589 | 5.85280963  |
| 5.710958248 | 6.050062314 | 5.747018437 |
| 6.868260923 | 6.262409813 | 5.846896491 |
| 5.88176931  | 5.487235578 | 5.808455041 |
| 6.237659753 | 5.730877274 | 5.639785372 |
| 6.132708936 | 5.646548708 | 6.106002855 |
| 6.646891402 | 5.536015311 | 6.146804616 |
| 7.082674313 | 5.444959821 | 6.673895676 |

|             |             |             |
|-------------|-------------|-------------|
| 6.081919147 | 5.563237524 | 6.203424521 |
| 5.492164182 | 6.80213334  | 5.876022985 |
| 5.509276091 | 6.786353491 | 6.538630475 |
| 6.45695401  | 7.503184697 | 7.084122766 |
| 6.511723669 | 5.976579852 | 6.609899266 |
| 6.266561677 | 6.407582364 | 6.271159138 |
| 6.077517037 | 5.452155268 | 6.643580946 |
| 5.43055255  | 6.283132176 | 5.835299597 |
| 5.410459162 | 5.73052704  | 5.981556762 |
| 6.282858501 | 5.387845255 | 6.196198652 |
| 6.24904624  | 5.432507141 | 5.87951066  |
| 6.384116098 | 6.252577195 | 7.148448558 |
| 5.522070589 | 6.073351604 | 6.757063131 |
| 5.781430663 | 6.206808227 | 6.367037413 |
| 6.848589914 | 7.288822477 | 5.632165263 |
| 5.735395933 | 5.583777954 | 5.544005173 |
| 6.18023187  | 5.389758545 | 5.646317577 |
| 5.489658606 | 5.375926585 | 6.004544929 |
| 6.768584153 | 6.146027821 | 6.370305585 |
| 5.863046833 | 6.109438301 | 5.942344482 |
| 5.463094963 | 5.996214906 | 6.663390388 |
| 5.630761093 | 6.133005596 | 7.019839868 |
| 5.467073619 | 5.952432094 | 6.614036798 |
| 6.694842653 | 5.425686789 | 7.353015124 |
| 5.86840226  | 5.861550688 | 5.529828624 |
| 5.892335298 | 5.479074156 | 5.832458714 |
| 6.444121278 | 5.55480302  | 5.682649353 |
| 5.398802104 | 6.760578652 | 6.259776831 |
| 5.960870656 | 5.439531047 | 5.808143371 |
| 6.705148161 | 6.362782824 | 6.581617052 |
| 5.885766333 | 5.610224821 | 6.127405816 |
| 6.011559504 | 5.480620929 | 5.66803427  |
| 6.496776098 | 5.535701146 | 5.37593576  |
| 6.048056901 | 6.38498898  | 5.547834133 |
| 6.218385923 | 6.042861438 | 5.440584006 |
| 7.315593907 | 6.188645397 | 5.60094487  |
| 6.380275329 | 5.59698204  | 5.940173662 |
| 5.892905891 | 5.415685584 | 5.628849941 |
| 7.148981088 | 5.447185968 | 5.933203256 |
| 6.75755466  | 5.982332519 | 6.385863227 |
| 7.030509317 | 5.402013345 | 6.387021478 |
| 5.462987514 | 5.421252846 | 5.606860323 |
| 6.253182959 | 6.137798573 | 6.355927948 |
| 5.53507862  | 6.251690474 | 6.156815641 |
| 5.533637782 | 5.90519603  | 5.728105708 |
| 5.410907527 | 5.74437471  | 5.731872073 |

|             |             |             |
|-------------|-------------|-------------|
| 6.140305692 | 6.382480412 | 5.600989332 |
| 6.264006072 | 6.157769978 | 5.666542897 |
| 5.373906906 | 5.848227674 | 5.726306505 |
| 6.712669512 | 5.726070868 | 5.436429012 |
| 8.078953623 | 8.106749173 | 7.59886946  |
| 6.669498703 | 5.716839401 | 7.063215343 |
| 5.870871581 | 5.71343782  | 5.977963694 |
| 6.595612886 | 5.611591839 | 6.13994607  |
| 7.337465186 | 6.178135996 | 6.874745387 |
| 6.120129823 | 5.641536581 | 5.530421002 |
| 5.644505548 | 5.846329813 | 5.843136093 |
| 5.912622306 | 5.597926767 | 5.370510782 |
| 7.153965246 | 5.482205564 | 6.335650961 |
| 6.059684405 | 6.047862812 | 5.778128853 |
| 5.816953749 | 6.068360507 | 6.345782226 |
| 6.021510038 | 5.803173959 | 7.473074698 |
| 5.876314289 | 5.39437919  | 5.642305754 |
| 5.736597192 | 6.348450361 | 5.687356183 |
| 5.715604352 | 5.497738316 | 5.953669785 |
| 5.896470913 | 5.381025739 | 5.758846371 |
| 6.779244731 | 5.405937235 | 5.820013755 |
| 7.009502638 | 6.04713545  | 6.57655656  |
| 6.540579023 | 5.796485206 | 6.345240214 |
| 6.724583879 | 5.412075195 | 5.851880486 |
| 5.651633701 | 6.388384834 | 6.395720365 |
| 6.726439775 | 6.41613399  | 7.102668962 |
| 7.264220755 | 5.939538024 | 6.676327698 |
| 6.949854794 | 6.616439796 | 6.166815172 |
| 6.040541223 | 5.485684717 | 5.840742276 |
| 6.777894368 | 6.72064533  | 7.303900352 |
| 6.453738954 | 6.013610007 | 5.954655345 |
| 5.442820764 | 8.345577233 | 7.715989516 |
| 6.907415725 | 6.285418296 | 6.760664776 |
| 6.464721177 | 5.836362381 | 5.567153102 |
| 5.690359963 | 5.641835415 | 5.510498165 |
| 5.912307058 | 5.551400018 | 6.168933648 |
| 6.484474851 | 6.842557416 | 6.802811108 |
| 5.757149249 | 5.733889954 | 6.009792496 |
| 6.451629913 | 5.393689894 | 5.738869503 |
| 5.896174503 | 5.527992453 | 5.883137461 |
| 5.880209819 | 5.60981265  | 5.851189084 |
| 6.368325278 | 6.100404402 | 6.444716838 |
| 7.16310588  | 7.57817979  | 5.761621106 |
| 5.734013068 | 5.679836547 | 6.399959585 |
| 5.710380272 | 5.471999554 | 6.601388323 |
| 5.440698872 | 5.615279809 | 5.397805497 |

|             |             |             |
|-------------|-------------|-------------|
| 6.213950088 | 5.626091071 | 5.991672439 |
| 6.849177077 | 6.291436575 | 6.747293992 |
| 6.439376149 | 6.492080879 | 6.545182121 |
| 6.184277308 | 5.365601819 | 6.366060677 |
| 5.460012417 | 6.51989075  | 7.258603488 |
| 6.093515398 | 5.372150862 | 6.534613858 |
| 6.461637694 | 6.667770476 | 5.418553057 |
| 6.599105559 | 6.316107901 | 6.507877414 |
| 5.823155795 | 6.062214633 | 5.441832938 |
| 6.358118961 | 5.843852463 | 7.126504621 |
| 6.0208009   | 6.200822287 | 7.448604632 |
| 5.574347566 | 6.004174886 | 6.388229144 |
| 6.579556008 | 6.158231926 | 5.664989476 |
| 5.792531162 | 5.844962826 | 5.402872595 |
| 5.751939726 | 6.033474438 | 6.040082674 |
| 6.454262772 | 5.730812121 | 5.372328892 |
| 6.560132507 | 6.65013373  | 6.637330915 |
| 5.760992176 | 5.495069588 | 5.926565453 |
| 5.395979379 | 5.915811777 | 5.653054718 |
| 6.117038173 | 5.379193232 | 5.525364792 |
| 6.597660504 | 5.451570489 | 5.929206622 |
| 7.410757054 | 5.95531879  | 6.27829622  |
| 5.966619316 | 5.388358826 | 5.862682806 |
| 5.689046442 | 5.791032034 | 6.421285127 |
| 6.069334596 | 5.349416361 | 5.462525114 |
| 5.815007047 | 5.321244997 | 6.894545484 |
| 6.156427958 | 5.583016279 | 5.878668478 |
| 6.274219343 | 5.385767252 | 5.976263636 |
| 5.785821696 | 5.372032474 | 5.485698093 |
| 5.605092257 | 5.349525576 | 5.877370516 |
| 6.446577733 | 6.614614985 | 6.416694037 |
| 7.210351976 | 5.397552278 | 5.492619987 |
| 5.324679034 | 6.004315909 | 5.475844343 |
| 5.903648198 | 5.762067501 | 5.512559787 |
| 5.865478649 | 5.343391006 | 6.676378834 |
| 5.495607766 | 6.137923601 | 6.175329129 |
| 5.895981455 | 5.959983346 | 5.372386548 |
| 6.305202334 | 5.744511655 | 5.49800644  |
| 5.786541893 | 5.481026544 | 6.148287323 |
| 6.621673982 | 6.990517916 | 8.264085889 |
| 6.032527206 | 6.063445038 | 6.277673692 |
| 5.64908039  | 6.391083993 | 6.151807653 |
| 5.836590606 | 5.404441572 | 5.843241154 |
| 6.31577278  | 5.522133828 | 7.955659451 |
| 5.637325078 | 5.615427055 | 6.5916145   |
| 6.149907352 | 5.702807867 | 6.029495744 |

|             |             |             |
|-------------|-------------|-------------|
| 6.936906505 | 8.042559447 | 6.058604334 |
| 5.957852049 | 5.83430421  | 5.673967643 |
| 5.84198058  | 5.368849758 | 6.219403777 |
| 5.791572712 | 5.47707572  | 5.486610441 |
| 5.849870221 | 6.062105589 | 5.42161222  |
| 6.746500074 | 5.3831694   | 6.578428255 |
| 6.408721946 | 6.108488854 | 6.741177887 |
| 6.159053794 | 5.539054068 | 5.401860356 |
| 6.941594957 | 5.338461722 | 6.178327831 |
| 5.787180577 | 6.109508891 | 5.551620905 |
| 5.917789379 | 6.3421296   | 5.472846032 |
| 6.727475116 | 5.373226243 | 5.40512156  |
| 5.312653943 | 5.682743197 | 5.47914815  |
| 5.4749206   | 5.397583953 | 5.802569068 |
| 7.139912164 | 7.437511085 | 5.43746681  |
| 7.543042787 | 6.344246259 | 6.670485473 |
| 6.316371196 | 5.334700641 | 6.251686989 |
| 6.830942366 | 6.396546143 | 6.627689783 |
| 5.474789203 | 5.691558616 | 5.657511033 |
| 6.715446367 | 5.362392094 | 6.59295355  |
| 6.010770711 | 5.587538431 | 7.003016206 |
| 6.973260449 | 5.824775652 | 5.337309756 |
| 5.853309814 | 5.644400091 | 7.080212454 |
| 6.116540032 | 5.335455126 | 5.780280948 |
| 5.415954537 | 6.050281191 | 6.254203258 |
| 5.309163711 | 7.418590316 | 7.388099578 |
| 6.504271893 | 5.49848672  | 5.783714602 |
| 5.848875724 | 5.974844953 | 7.278382486 |
| 7.77430705  | 5.633841573 | 6.0952816   |
| 6.635686165 | 5.414749056 | 6.170135578 |
| 5.636589857 | 5.45092947  | 6.085145199 |
| 6.148309492 | 5.876287965 | 6.110056125 |
| 7.463939108 | 5.902762159 | 6.12012044  |
| 6.184389357 | 5.382187871 | 5.927720074 |
| 6.397075043 | 5.456401781 | 5.875893407 |
| 5.676461087 | 5.379281842 | 5.360943669 |
| 6.788416526 | 5.283513879 | 5.723407216 |
| 6.50345677  | 7.320450205 | 6.380115425 |
| 5.982595576 | 5.532802641 | 5.619776491 |
| 5.889264454 | 5.48332175  | 6.468468152 |
| 6.023760757 | 6.223391271 | 6.288025039 |
| 6.566414324 | 7.170484411 | 6.623038138 |
| 6.503129157 | 5.713743226 | 6.584970905 |
| 6.222652987 | 5.348351413 | 6.059360069 |
| 5.351397841 | 5.639969553 | 5.707626393 |
| 5.989031641 | 5.66504598  | 6.121511879 |

|             |             |             |
|-------------|-------------|-------------|
| 5.926013751 | 6.268070333 | 5.302211111 |
| 5.318103677 | 6.07355715  | 5.900343353 |
| 6.266605994 | 6.203155474 | 5.792830036 |
| 5.551744479 | 5.90781836  | 6.308731638 |
| 6.165117383 | 5.709653939 | 5.423431    |
| 7.229729244 | 6.482317272 | 6.328526857 |
| 7.413554681 | 6.191011781 | 6.684276314 |
| 6.423979195 | 6.522030235 | 5.961268629 |
| 8.113833891 | 6.425336735 | 7.358557017 |
| 5.350739624 | 5.578531039 | 5.493624149 |
| 6.283044812 | 6.578550838 | 5.456458104 |
| 6.153633521 | 5.483139349 | 6.034828001 |
| 5.747090694 | 6.223909824 | 6.038639089 |
| 6.033213455 | 5.279809576 | 6.940337343 |
| 5.927557968 | 5.476982684 | 7.64322012  |
| 6.586628901 | 6.261197078 | 5.697657473 |
| 5.377051855 | 5.962350657 | 5.851877074 |
| 7.07860467  | 5.659705584 | 6.303526247 |
| 5.250609975 | 6.916209373 | 6.510067328 |
| 6.5989047   | 5.886624276 | 6.168374625 |
| 5.384188035 | 7.786127238 | 9.3011511   |
| 7.303948571 | 7.395097908 | 7.565816466 |
| 5.579650477 | 6.213647136 | 6.038588067 |
| 6.270894454 | 5.924248992 | 5.661590614 |
| 5.53818128  | 5.579199329 | 5.926250552 |
| 12.1776266  | 11.07438985 | 7.380551236 |
| 5.567768535 | 5.335254213 | 6.98192512  |
| 6.514727351 | 6.085248248 | 6.210405403 |
| 6.396831884 | 6.244894812 | 6.487484031 |
| 5.950928359 | 5.274764614 | 5.426013689 |
| 5.856778618 | 5.866139673 | 5.341876578 |
| 5.419097548 | 5.479054584 | 5.376510789 |
| 5.770521106 | 5.53965636  | 5.745267916 |
| 7.202150563 | 6.26808664  | 5.755940314 |
| 9.551757277 | 7.390985758 | 5.409030375 |
| 6.718013707 | 5.265925333 | 6.083578983 |
| 6.071815557 | 6.259552942 | 5.975907137 |
| 5.588194048 | 5.728941689 | 5.281111359 |
| 6.566797444 | 5.29587508  | 5.661290334 |
| 5.927507709 | 5.535561642 | 5.474809179 |
| 5.752528867 | 5.26780979  | 5.485736132 |
| 5.966329256 | 5.912106178 | 6.855924725 |
| 5.329400006 | 5.582953437 | 6.077942816 |
| 5.569101643 | 5.711282384 | 5.325404383 |
| 5.410695344 | 5.502593441 | 5.464775737 |
| 5.955020926 | 5.868640775 | 5.376522921 |



|             |             |             |
|-------------|-------------|-------------|
| 6.911371266 | 6.991675362 | 6.749452156 |
| 6.27594239  | 5.437550227 | 5.737735985 |
| 6.302788388 | 5.297862809 | 5.799601571 |
| 5.899331245 | 6.118865419 | 6.271663096 |
| 6.406254377 | 5.760708508 | 5.950202518 |
| 5.325831361 | 8.806672093 | 9.138695076 |
| 7.620305076 | 5.372674482 | 7.292123897 |
| 5.289263152 | 7.100879165 | 6.896082776 |
| 5.261493151 | 5.761960218 | 6.161393877 |
| 5.245602288 | 5.802444253 | 5.636241303 |
| 6.529148759 | 5.581271564 | 7.376492034 |
| 6.401978454 | 5.311585792 | 6.623322186 |
| 6.468698907 | 6.077349264 | 6.022398939 |
| 6.114032073 | 5.295834828 | 5.432906192 |
| 6.210017718 | 5.422968641 | 6.415971562 |
| 5.67276384  | 5.273272672 | 6.04804916  |
| 6.490653642 | 5.316416643 | 6.134671418 |
| 5.602507558 | 5.795045923 | 7.401193381 |
| 6.229824993 | 5.829554765 | 6.06256158  |
| 5.654980324 | 5.492477689 | 5.309193665 |
| 6.360744984 | 5.895534838 | 6.748915289 |
| 7.279095221 | 6.389865517 | 7.233927289 |
| 6.684520142 | 5.270450813 | 5.986614589 |
| 5.403015473 | 5.606894887 | 5.416044236 |
| 6.118521261 | 5.693728962 | 5.4617026   |
| 6.316360478 | 6.471778883 | 6.130911497 |
| 6.336611562 | 6.411640236 | 6.024772898 |
| 6.452190543 | 6.365605825 | 5.59767479  |
| 5.829667487 | 6.107084451 | 5.303090413 |
| 6.678286175 | 5.895511279 | 5.4435532   |
| 5.682430498 | 5.311466694 | 6.2573493   |
| 5.25922729  | 5.823041854 | 5.815231168 |
| 6.768745126 | 5.412318056 | 5.964410731 |
| 6.501091561 | 6.005885922 | 5.282990873 |
| 6.923498127 | 7.761722479 | 6.758805365 |
| 5.69949819  | 5.463000996 | 5.764054318 |
| 5.262079297 | 5.372603062 | 5.519701401 |
| 7.344865169 | 6.655061977 | 5.212775179 |
| 5.275939478 | 8.605531162 | 10.16461237 |
| 6.265971315 | 5.795930452 | 5.610100303 |
| 5.983501663 | 5.622636692 | 5.307638628 |
| 7.113930954 | 5.616415934 | 5.344831243 |
| 6.041273345 | 5.25477886  | 5.515110108 |
| 5.624479255 | 5.379214742 | 5.825217201 |
| 6.139608279 | 5.377522963 | 5.667325413 |
| 5.629709964 | 5.254545061 | 5.53089365  |

|             |             |             |
|-------------|-------------|-------------|
| 6.506682119 | 5.453579367 | 5.815554068 |
| 6.880346851 | 6.678593512 | 5.529616063 |
| 6.219308552 | 5.678610316 | 5.472050214 |
| 5.236306596 | 5.535849797 | 5.352192999 |
| 5.413690685 | 6.319561629 | 5.544832088 |
| 5.378842074 | 5.370792497 | 5.247129769 |
| 5.479545359 | 5.953859183 | 6.67681621  |
| 6.29677963  | 5.265966146 | 5.773639935 |
| 5.344123739 | 5.493051982 | 5.736941157 |
| 6.302474239 | 5.52948587  | 5.942826954 |
| 5.693363114 | 5.215653308 | 6.564777401 |
| 5.236146676 | 6.0255401   | 5.555147614 |
| 5.888212092 | 6.480012309 | 6.469861827 |
| 6.418322108 | 5.254557744 | 5.833139478 |
| 5.774233964 | 5.360748191 | 5.735699703 |
| 6.033721615 | 5.938449926 | 6.836065943 |
| 5.279382916 | 6.286223653 | 5.967131803 |
| 6.52482385  | 7.099827444 | 6.317621459 |
| 5.598662987 | 6.103849689 | 6.064004885 |
| 6.438098513 | 5.23119013  | 6.388382298 |
| 6.370772423 | 6.046534448 | 5.898280076 |
| 5.859170163 | 7.35993452  | 5.967244773 |
| 5.547361961 | 5.773082357 | 5.692884    |
| 5.68358063  | 5.451456217 | 5.47443     |
| 5.937176815 | 5.268002425 | 5.242980208 |
| 6.338293546 | 5.216012463 | 6.024463928 |
| 5.439992068 | 5.383359485 | 5.235749113 |
| 6.143644311 | 5.282638247 | 5.522117949 |
| 5.433588165 | 6.58892441  | 5.766036677 |
| 5.79319537  | 5.212956919 | 6.918350338 |
| 6.786158874 | 5.551733704 | 5.326908076 |
| 7.621274764 | 7.674523611 | 7.07310221  |
| 5.58123286  | 5.70598509  | 6.500252841 |
| 5.214058777 | 5.510593442 | 5.814620765 |
| 5.684674687 | 5.207548623 | 7.401082919 |
| 5.182912616 | 5.96201169  | 5.869640173 |
| 5.533238905 | 6.417414902 | 5.651012619 |
| 6.017177284 | 5.244031533 | 6.074996169 |
| 5.697165012 | 6.901354727 | 6.350531245 |
| 5.441390907 | 6.91725962  | 6.835979736 |
| 5.256114471 | 6.006864739 | 5.797173148 |
| 6.848271278 | 5.585477021 | 5.194692641 |
| 5.209933292 | 6.26051353  | 5.595197614 |
| 5.683355475 | 6.535607409 | 6.314028525 |
| 5.602010381 | 5.235192751 | 5.326253829 |
| 5.678077653 | 5.582114499 | 6.167017211 |

|             |             |             |
|-------------|-------------|-------------|
| 7.585053696 | 5.268715218 | 6.350179253 |
| 6.208407784 | 5.953658884 | 5.846438124 |
| 6.333872867 | 5.201454308 | 5.645987467 |
| 6.327128016 | 5.421066348 | 5.626895077 |
| 6.366489813 | 5.240542011 | 5.636314826 |
| 5.989244723 | 5.708040246 | 5.441890243 |
| 7.663201723 | 5.692183248 | 7.473917519 |
| 5.539363633 | 5.501597108 | 6.150424194 |
| 6.144504816 | 5.256884036 | 6.056127645 |
| 5.848104258 | 5.419100528 | 5.36587065  |
| 6.631344334 | 6.29294757  | 6.298271986 |
| 5.36875859  | 5.459640314 | 5.893947258 |
| 5.572202083 | 6.988168319 | 6.238281097 |
| 6.235591487 | 5.64111346  | 5.205722777 |
| 6.212782867 | 5.250015312 | 5.80222421  |
| 5.547809922 | 5.434205166 | 6.590002287 |
| 5.517835942 | 5.366419747 | 6.010592595 |
| 6.72092295  | 5.241931393 | 6.342984377 |
| 6.452817612 | 5.988274171 | 5.975910802 |
| 5.855295814 | 5.278976527 | 5.341594994 |
| 5.95611455  | 5.588862589 | 5.768292318 |
| 7.028204847 | 6.655845982 | 6.636642795 |
| 5.829315524 | 5.251845327 | 6.247437526 |
| 5.303434384 | 6.633336528 | 6.686475241 |
| 5.70311041  | 5.316192383 | 5.512816554 |
| 6.391483002 | 5.464704846 | 5.91767468  |
| 5.812959245 | 5.231394547 | 5.235955841 |
| 5.787257078 | 5.380460159 | 5.334909459 |
| 6.133132891 | 5.819936443 | 5.885971262 |
| 5.192851298 | 5.848522921 | 5.661814583 |
| 5.973117197 | 5.238952365 | 5.940726036 |
| 6.416444169 | 6.077658855 | 6.242238305 |
| 5.897239631 | 6.497824965 | 6.770087398 |
| 5.714403144 | 5.307963229 | 5.360726677 |
| 5.59499413  | 5.432369878 | 5.239937875 |
| 6.061182639 | 5.884863239 | 5.271988507 |
| 6.257128715 | 6.268295078 | 6.39466266  |
| 6.31454098  | 5.904608967 | 6.063021232 |
| 6.414209883 | 5.19199951  | 5.78283642  |
| 5.371922239 | 5.428787505 | 5.562723087 |
| 7.303102227 | 5.372075902 | 5.856819592 |
| 6.511319644 | 5.277510866 | 6.114230935 |
| 5.816661175 | 5.178255275 | 5.889559207 |
| 7.412518024 | 6.125731197 | 8.201877029 |
| 6.426026318 | 5.811368061 | 5.980471178 |
| 6.199558513 | 5.293169104 | 5.18691992  |

|             |             |             |
|-------------|-------------|-------------|
| 7.01589864  | 5.792039436 | 5.23898877  |
| 5.198271424 | 6.347195723 | 5.529395994 |
| 5.705453081 | 5.605453044 | 5.346107594 |
| 6.162427889 | 5.392935373 | 6.247784699 |
| 5.355783653 | 5.215865699 | 6.392069345 |
| 6.577088412 | 5.64140066  | 6.932736126 |
| 6.177924896 | 6.563670268 | 6.167604785 |
| 6.38523401  | 5.313733998 | 5.524129543 |
| 6.032835307 | 6.020682074 | 5.67296127  |
| 6.486265781 | 5.880458875 | 5.576204535 |
| 6.436634888 | 5.236725591 | 5.536482761 |
| 5.789936606 | 6.790405005 | 6.487118817 |
| 5.232488551 | 5.245834211 | 5.831637748 |
| 6.683853605 | 5.245021868 | 6.251178802 |
| 6.605832368 | 5.206703926 | 5.577757258 |
| 5.39951403  | 5.211244522 | 5.220559015 |
| 5.955794884 | 6.206445691 | 6.34521842  |
| 6.39728681  | 5.174156619 | 6.367880103 |
| 5.941933596 | 6.233584019 | 8.370909718 |
| 7.460766626 | 6.855712426 | 6.798864527 |
| 5.862667125 | 5.256219086 | 5.38563035  |
| 6.901122103 | 5.258330408 | 6.127449956 |
| 5.422699393 | 5.841571652 | 5.556937581 |
| 6.294755841 | 6.060687005 | 5.42399823  |
| 6.468222414 | 6.080704998 | 6.038027948 |
| 5.997435106 | 5.379799991 | 7.959669367 |
| 5.400485287 | 5.224077049 | 5.609710164 |
| 6.435268221 | 6.505964556 | 6.408802336 |
| 5.212847342 | 5.736405708 | 5.672672085 |
| 6.072346845 | 5.693907417 | 6.561309217 |
| 5.635267735 | 6.005400971 | 6.0511571   |
| 6.542860311 | 6.932956452 | 5.2551624   |
| 6.419086191 | 5.264124771 | 6.375944993 |
| 5.729785965 | 5.670692928 | 6.631582898 |
| 11.0750036  | 6.769909434 | 5.445173374 |
| 6.514663395 | 5.229689226 | 6.151138413 |
| 5.232068232 | 6.222562515 | 5.635785221 |
| 5.819027361 | 6.241642285 | 5.207833384 |
| 5.646529608 | 6.173937602 | 5.457447906 |
| 6.099701419 | 5.561960886 | 6.490240803 |
| 6.692894482 | 5.250449272 | 6.801996365 |
| 6.382122655 | 5.914440848 | 6.219360266 |
| 5.894150055 | 6.472177923 | 5.794718791 |
| 6.305892004 | 6.285458915 | 5.476586819 |
| 5.493107685 | 5.414233898 | 5.878897119 |
| 5.646791247 | 5.19826801  | 6.406075131 |

|             |             |             |
|-------------|-------------|-------------|
| 6.87525623  | 6.360320307 | 6.32840405  |
| 7.525183146 | 6.886675742 | 7.739739451 |
| 7.923494128 | 7.058461536 | 7.6029251   |
| 6.27526802  | 5.464230103 | 5.162646686 |
| 7.482892537 | 8.783369394 | 7.878819361 |
| 7.271969593 | 5.672808315 | 6.289119625 |
| 5.419925394 | 5.711709996 | 5.591210768 |
| 5.453117321 | 7.223066901 | 5.903789404 |
| 5.433103588 | 5.18647375  | 5.290887793 |
| 8.316913447 | 7.431742327 | 7.031726252 |
| 5.409461856 | 5.248792483 | 5.814333855 |
| 5.938159817 | 5.177475735 | 5.8032401   |
| 6.19139966  | 6.355583128 | 5.978602678 |
| 5.204541045 | 5.438938524 | 5.329443184 |
| 5.502095943 | 5.578250262 | 5.34805602  |
| 6.049954068 | 5.33498838  | 5.581249969 |
| 6.00045306  | 5.694688538 | 5.38694493  |
| 6.190917381 | 5.49527267  | 5.871319655 |
| 6.084619542 | 5.846779884 | 5.888376653 |
| 5.893193386 | 5.690924982 | 5.279539888 |
| 5.594966039 | 6.106839194 | 5.217135905 |
| 6.408789033 | 5.318897156 | 5.575095293 |
| 5.936646303 | 5.41524571  | 5.919031863 |
| 8.48691715  | 6.462874463 | 5.72984356  |
| 6.843807944 | 6.199907152 | 5.647287452 |
| 6.090944904 | 6.053039513 | 5.993791655 |
| 5.929192686 | 5.432559231 | 6.049463198 |
| 5.964251873 | 5.378666538 | 5.858138358 |
| 5.851429273 | 5.449354533 | 5.515908098 |
| 5.58814829  | 5.567869695 | 5.300101989 |
| 5.193815323 | 7.122400845 | 6.007596089 |
| 8.638417338 | 5.145047438 | 8.476746872 |
| 6.221204253 | 5.368013638 | 5.961655796 |
| 5.183624346 | 5.208377231 | 5.687222235 |
| 5.995794841 | 6.161902305 | 5.534639466 |
| 5.8112076   | 5.775560408 | 5.596841276 |
| 8.096279416 | 7.284528442 | 6.485502956 |
| 6.844226348 | 5.131855245 | 6.165651484 |
| 5.929109635 | 5.219653106 | 5.760965447 |
| 5.349181199 | 5.187213252 | 5.164360979 |
| 6.32912594  | 5.354127766 | 5.889569517 |
| 5.184468647 | 5.900762678 | 8.123195688 |
| 5.933887468 | 5.548275616 | 5.370984336 |
| 5.856350616 | 6.467888732 | 5.223296814 |
| 6.042115861 | 5.338600179 | 5.170774486 |
| 5.676596282 | 5.755075591 | 5.833981702 |

|             |             |             |
|-------------|-------------|-------------|
| 5.766227769 | 5.567470725 | 6.236843795 |
| 5.745647933 | 5.843256083 | 6.009334369 |
| 6.10752325  | 5.325752893 | 6.228755039 |
| 5.618474645 | 6.041909541 | 6.105323642 |
| 5.120673772 | 7.392610826 | 8.580252984 |
| 5.685427081 | 6.143838596 | 6.674662132 |
| 6.250359681 | 5.565522266 | 5.164444605 |
| 6.173866224 | 5.393252816 | 5.94694529  |
| 5.448033797 | 5.156287703 | 5.592500516 |
| 6.25856833  | 6.984400731 | 5.218330981 |
| 5.975341578 | 6.600869533 | 6.464409043 |
| 5.995773212 | 5.877430097 | 5.388633607 |
| 6.013852043 | 5.194343458 | 5.387105158 |
| 5.858784612 | 5.949769964 | 5.613056821 |
| 7.374966471 | 6.055182748 | 6.981895271 |
| 6.266335268 | 6.543719766 | 5.562386613 |
| 6.549489485 | 6.379930874 | 5.133839333 |
| 6.399100051 | 5.433711572 | 6.292926492 |
| 5.905614244 | 6.650609154 | 6.453479191 |
| 5.219785571 | 5.670852218 | 5.344647253 |
| 5.903913455 | 6.200064382 | 5.919690336 |
| 6.003958813 | 5.181315999 | 6.286517891 |
| 5.105494048 | 5.706299325 | 5.753501775 |
| 5.213715858 | 5.578698938 | 5.822631038 |
| 5.530705371 | 5.61964532  | 5.991593937 |
| 5.703159537 | 5.247311549 | 6.538151595 |
| 5.783376272 | 6.017564534 | 6.706688935 |
| 6.326347613 | 5.216546959 | 5.498814931 |
| 6.019949439 | 5.151591987 | 5.450230768 |
| 7.066285104 | 5.550674311 | 5.36539789  |
| 5.746142212 | 5.922324822 | 5.564787922 |
| 6.197366646 | 5.659913914 | 5.138814884 |
| 5.179608448 | 5.766337571 | 5.843600114 |
| 6.428721248 | 6.114397554 | 5.736461701 |
| 5.5174565   | 6.374818392 | 6.92410588  |
| 5.223935257 | 5.894590175 | 5.259853123 |
| 5.246122611 | 6.81623683  | 7.445903363 |
| 8.843394204 | 7.36341996  | 6.526183287 |
| 5.856696012 | 5.363421772 | 5.36367543  |
| 5.53276995  | 5.58513799  | 6.59070178  |
| 5.169061909 | 5.32038632  | 5.605839042 |
| 6.409762969 | 5.313696409 | 5.213993693 |
| 6.062405886 | 5.262525597 | 5.499247387 |
| 6.02983706  | 5.84801686  | 6.416293861 |
| 6.00017054  | 5.474411799 | 5.581978034 |
| 7.198900921 | 5.849197371 | 6.576757165 |

|             |             |             |
|-------------|-------------|-------------|
| 5.995636259 | 5.977685786 | 6.06794241  |
| 5.986923566 | 5.164405051 | 5.184239034 |
| 6.495585051 | 9.376666715 | 6.193969563 |
| 6.375609962 | 5.831193469 | 5.174756235 |
| 5.882081163 | 5.631901378 | 5.447420452 |
| 6.599345912 | 6.007136625 | 6.095430488 |
| 5.924535628 | 6.171025397 | 5.151258641 |
| 6.001094628 | 6.049662263 | 6.040775487 |
| 5.595047144 | 5.556716242 | 5.193012689 |
| 5.112149216 | 5.496330055 | 5.359697137 |
| 5.406139475 | 5.465172128 | 5.927793883 |
| 5.871769459 | 5.537187168 | 5.620456754 |
| 5.969521687 | 5.334568556 | 5.183896361 |
| 6.00178013  | 6.526925713 | 6.161461037 |
| 6.337797603 | 5.612578567 | 6.012224538 |
| 6.222794499 | 6.494493483 | 5.170974772 |
| 5.196419347 | 7.149216126 | 6.190418131 |
| 6.58520998  | 5.131873351 | 6.319618708 |
| 5.731317793 | 5.168870026 | 6.370561686 |
| 5.619582724 | 5.327357458 | 5.526970098 |
| 6.127255754 | 6.266330612 | 5.169111453 |
| 5.758210447 | 5.138227893 | 5.295014026 |
| 5.894438016 | 6.109433517 | 5.079859508 |
| 5.076545657 | 6.121294255 | 5.723315493 |
| 5.688308636 | 5.244533442 | 6.606804741 |
| 5.568800879 | 5.105398587 | 6.109451262 |
| 5.195256912 | 5.902542579 | 6.378682831 |
| 6.526124178 | 6.153325445 | 5.912540215 |
| 5.727714067 | 5.1058806   | 5.752501525 |
| 7.090587362 | 6.734296945 | 6.0181072   |
| 6.050087906 | 6.531639973 | 5.965461832 |
| 5.766539651 | 5.115344606 | 5.182232554 |
| 6.064626536 | 6.092802143 | 5.520331677 |
| 5.774189094 | 5.132256632 | 5.683589005 |
| 5.703999438 | 5.105375476 | 5.338918375 |
| 6.253492636 | 5.988254029 | 6.417624632 |
| 5.771525585 | 5.314025096 | 5.407009976 |
| 5.417026684 | 5.247395682 | 6.854407074 |
| 6.70990108  | 5.885168072 | 6.318559646 |
| 5.236679598 | 5.086158268 | 6.750075357 |
| 5.613882469 | 5.192814392 | 5.965105444 |
| 6.063429826 | 6.335425071 | 6.171143033 |
| 6.418788645 | 6.920184725 | 5.94967316  |
| 5.865391222 | 5.131785803 | 5.498081135 |
| 5.436727337 | 5.160790442 | 6.254217233 |
| 5.078770262 | 6.101369149 | 6.166958409 |

|             |             |             |
|-------------|-------------|-------------|
| 6.053732169 | 5.642355455 | 5.881657164 |
| 5.951392111 | 5.162437321 | 6.108516037 |
| 5.076720291 | 5.902410871 | 6.04976798  |
| 6.034813906 | 5.143458967 | 6.048673868 |
| 5.379652548 | 5.258212504 | 6.034539715 |
| 6.769857118 | 5.699597204 | 5.841748801 |
| 5.987863974 | 5.307641629 | 7.056031485 |
| 6.869687684 | 5.812308877 | 6.439715344 |
| 6.641288228 | 5.25784008  | 6.087296673 |
| 5.926076535 | 5.987860434 | 5.425230148 |
| 6.186370959 | 5.466752379 | 5.85641805  |
| 6.829915727 | 5.95459418  | 7.032401493 |
| 5.251513161 | 6.661587334 | 6.017568836 |
| 6.394855147 | 5.854711907 | 5.913245492 |
| 6.178248649 | 5.667254678 | 5.969744573 |
| 5.542830478 | 5.126423291 | 5.61114235  |
| 5.156892081 | 6.135313424 | 6.004653188 |
| 6.418977386 | 5.946505414 | 5.675610986 |
| 5.748970759 | 6.064954582 | 5.615367695 |
| 6.688220205 | 6.054014234 | 5.736273273 |
| 6.364870365 | 5.200996951 | 5.341289727 |
| 5.790323356 | 5.13213635  | 6.439082083 |
| 7.059255943 | 5.10509451  | 6.309462003 |
| 6.340632957 | 5.093128746 | 6.154249876 |
| 5.294124353 | 6.004608166 | 6.224556333 |
| 6.546537704 | 6.141503898 | 6.947123054 |
| 5.619397482 | 5.271635933 | 5.161638043 |
| 6.601359826 | 5.326264092 | 7.6432374   |
| 5.335493637 | 5.931170853 | 6.488928897 |
| 6.719861492 | 7.287648487 | 5.128178352 |
| 7.056712086 | 7.099915899 | 5.142439159 |
| 5.19814514  | 5.335083061 | 5.110694792 |
| 5.529764741 | 5.435350341 | 5.287205475 |
| 5.847574019 | 5.943183546 | 6.031451447 |
| 5.646681798 | 5.057743051 | 5.275820562 |
| 5.41868583  | 5.143887177 | 6.876593406 |
| 5.550526971 | 6.059324744 | 6.158281786 |
| 5.385145774 | 6.015009077 | 5.954820138 |
| 5.670207115 | 5.16799802  | 6.726337582 |
| 6.502107475 | 5.715688139 | 6.071153491 |
| 6.799557754 | 6.346896707 | 6.86353518  |
| 6.543570873 | 5.413212945 | 5.836610954 |
| 5.692272569 | 6.040194543 | 6.162308269 |
| 5.213575597 | 5.559803112 | 5.071754672 |
| 5.123166083 | 5.607791499 | 6.004545735 |
| 6.60168082  | 5.183641272 | 5.738138123 |



|             |             |             |
|-------------|-------------|-------------|
| 5.761811514 | 5.888239194 | 5.307816433 |
| 5.439582155 | 5.331983144 | 5.221551559 |
| 6.002218225 | 6.010850114 | 5.956216155 |
| 5.69979619  | 7.954892198 | 6.277028789 |
| 6.326402679 | 5.611588966 | 6.73276888  |
| 6.169488792 | 5.256764443 | 5.78195145  |
| 6.621800297 | 5.874786507 | 5.121584254 |
| 5.671588192 | 5.378140808 | 5.643425102 |
| 5.712416419 | 6.142805511 | 6.885731699 |
| 5.635959981 | 5.079269653 | 6.335041118 |
| 6.639396938 | 5.533586764 | 6.084547881 |
| 5.189065056 | 5.655900899 | 5.680811504 |
| 6.661154318 | 5.466891449 | 5.737205651 |
| 6.659072608 | 6.839912179 | 6.848593559 |
| 6.125865774 | 5.176820798 | 6.072723786 |
| 6.116142927 | 5.320692581 | 5.647434698 |
| 5.54250639  | 6.185390881 | 5.778327982 |
| 5.732623318 | 5.563356409 | 5.326161186 |
| 6.279427257 | 5.131880081 | 5.912228873 |
| 5.60735607  | 7.565649869 | 5.835657162 |
| 6.348403172 | 6.000792989 | 6.678241742 |
| 5.578686751 | 5.825481333 | 6.018064019 |
| 5.60589895  | 6.046281873 | 5.32900896  |
| 5.36715689  | 5.103622212 | 6.8474763   |
| 6.340606034 | 5.680180107 | 6.676567967 |
| 5.948500075 | 5.246834665 | 6.561397987 |
| 6.290246427 | 6.283597462 | 6.131455141 |
| 6.438353091 | 6.08217664  | 5.738894008 |
| 5.528341077 | 5.129413584 | 5.689446316 |
| 6.343899932 | 5.088127155 | 6.093013395 |
| 6.921935257 | 5.174573091 | 6.095846102 |
| 5.086840354 | 7.591376832 | 6.066358501 |
| 5.274484064 | 6.874245275 | 5.164265541 |
| 5.045398682 | 5.445779419 | 6.24510427  |
| 6.159033837 | 5.606878519 | 5.915523655 |
| 5.329602477 | 5.335600855 | 5.59807535  |
| 5.203733477 | 5.485017532 | 5.917563091 |
| 5.885339513 | 7.168998767 | 5.1713543   |
| 5.48583907  | 5.978422304 | 5.236309884 |
| 5.528031151 | 6.147516333 | 5.248702482 |
| 6.185292322 | 5.713468096 | 6.16937739  |
| 6.333375724 | 6.495546917 | 6.804519723 |
| 5.293607702 | 6.255690737 | 5.589463772 |
| 5.110295743 | 5.195312058 | 6.106801303 |
| 8.276851724 | 5.074370191 | 6.242347068 |
| 6.404852696 | 5.63697964  | 6.047087021 |

|             |             |             |
|-------------|-------------|-------------|
| 5.576227244 | 5.973721763 | 5.422977533 |
| 6.640541279 | 5.101156149 | 5.677333367 |
| 5.04385411  | 5.699902177 | 5.521698661 |
| 6.765868606 | 5.04212086  | 6.539475908 |
| 6.799392216 | 7.676408608 | 6.236387859 |
| 5.063427834 | 5.167977885 | 5.456088109 |
| 6.205440069 | 5.159743132 | 6.584902099 |
| 5.249334624 | 5.133228382 | 5.335502376 |
| 5.641713026 | 5.230526871 | 6.038764493 |
| 5.326643306 | 5.200416791 | 5.866230723 |
| 5.207500125 | 6.140439686 | 5.644192815 |
| 6.775166373 | 5.426230425 | 6.238045585 |
| 6.632881314 | 5.09375785  | 5.526156792 |
| 5.425027431 | 5.454250111 | 6.399292228 |
| 5.748400442 | 5.916008682 | 5.32591551  |
| 5.803028682 | 5.467180668 | 5.59920432  |
| 6.271462483 | 6.226099179 | 5.096019734 |
| 5.633427125 | 5.985516085 | 5.510467529 |
| 5.895043058 | 5.037127866 | 6.239621014 |
| 5.430208709 | 5.527852159 | 5.168251069 |
| 5.944835147 | 5.139871664 | 6.45485671  |
| 5.909152739 | 5.237092704 | 5.832857025 |
| 5.808966914 | 6.308955405 | 7.547648027 |
| 5.783966089 | 5.210993581 | 5.325686078 |
| 5.864170528 | 5.377972415 | 6.819870779 |
| 6.526586976 | 6.206992156 | 6.22673752  |
| 7.51792412  | 6.465930133 | 5.092489315 |
| 5.690681823 | 5.053531634 | 5.503817323 |
| 5.516477064 | 5.344279004 | 5.400875042 |
| 5.206842579 | 5.268689457 | 5.479278748 |
| 5.984283061 | 5.857744095 | 5.828818728 |
| 6.510684745 | 5.49411944  | 6.159426163 |
| 5.15808813  | 5.012292529 | 5.384456769 |
| 5.258274473 | 5.019760958 | 5.406823452 |
| 5.885879703 | 5.0963412   | 6.153087602 |
| 6.150512678 | 5.897128787 | 5.171909967 |
| 5.523079464 | 5.768733878 | 5.111309228 |
| 5.979834498 | 5.984833397 | 5.120491142 |
| 5.937261495 | 5.530235023 | 5.939508066 |
| 5.660074663 | 5.141492392 | 5.761347641 |
| 6.418188377 | 5.246795491 | 5.680662495 |
| 7.258356349 | 6.927783756 | 6.175259614 |
| 5.135056346 | 5.618079952 | 5.72464348  |
| 6.539005037 | 4.993526901 | 5.560781991 |
| 6.725528554 | 5.527325013 | 5.548268645 |
| 5.539744381 | 5.364290436 | 5.276780234 |

|             |             |             |
|-------------|-------------|-------------|
| 6.020380432 | 5.510696984 | 6.663263313 |
| 5.977717365 | 5.314834364 | 6.00882637  |
| 5.99728391  | 6.774796303 | 5.183992666 |
| 6.187129819 | 5.170039175 | 6.224427679 |
| 5.650552912 | 6.022014862 | 5.410452866 |
| 5.812340242 | 6.534740372 | 5.158091705 |
| 5.090880851 | 5.762100782 | 5.008992427 |
| 5.414868768 | 5.307562077 | 5.864500793 |
| 6.899568974 | 6.961498423 | 6.431358465 |
| 5.180005566 | 5.544990581 | 5.531262995 |
| 5.650528615 | 5.421652364 | 5.637226646 |
| 5.092771417 | 6.791286127 | 5.469706973 |
| 6.121470669 | 6.386462306 | 5.386582607 |
| 5.771380399 | 6.103251266 | 5.582062213 |
| 5.290445865 | 5.487253146 | 5.637446232 |
| 5.985758011 | 5.8942505   | 6.07466186  |
| 5.844073824 | 5.070072501 | 6.81532823  |
| 6.10583597  | 5.776726473 | 5.838426232 |
| 5.510376254 | 6.232718651 | 6.44306482  |
| 6.56693503  | 6.428830799 | 7.159388767 |
| 5.438628108 | 5.053334192 | 5.23323279  |
| 6.849650517 | 6.496621515 | 7.013349916 |
| 5.536117806 | 5.004621728 | 6.227755114 |
| 6.221922328 | 5.182496695 | 5.003206824 |
| 5.986866341 | 5.055252486 | 6.424330628 |
| 5.135386089 | 5.248978468 | 6.044110746 |
| 5.163483107 | 5.525245231 | 5.787693363 |
| 6.963924461 | 5.338819111 | 6.511136787 |
| 5.077776821 | 5.776803672 | 5.533203626 |
| 5.594456432 | 5.193985574 | 6.206284401 |
| 5.060562434 | 5.777613991 | 5.671719762 |
| 5.153720329 | 6.133451384 | 5.781165534 |
| 5.257320228 | 5.057482175 | 5.649222168 |
| 7.180241807 | 6.608737191 | 7.30858133  |
| 6.300392341 | 5.341708019 | 6.612541386 |
| 6.238778373 | 7.261841693 | 5.42662399  |
| 5.059954611 | 5.232166486 | 5.433474697 |
| 6.04630912  | 7.287040786 | 6.844475967 |
| 5.445166802 | 5.02196459  | 5.579302127 |
| 5.022607297 | 5.890811287 | 5.994609133 |
| 5.23537153  | 5.840124837 | 5.571709039 |
| 7.340711401 | 5.598129468 | 6.924534696 |
| 5.31737661  | 5.997640892 | 6.485366632 |
| 5.831774602 | 5.634159639 | 5.023782032 |
| 5.592175538 | 5.013590042 | 5.959334335 |
| 5.077537347 | 5.279801991 | 5.199680395 |

|             |             |             |
|-------------|-------------|-------------|
| 4.994807447 | 5.161480878 | 5.576168496 |
| 6.786667166 | 6.057122003 | 5.051320953 |
| 5.986159065 | 5.569991662 | 5.356285805 |
| 5.580459792 | 6.079517868 | 5.121904939 |
| 5.84199539  | 5.087718158 | 6.679992028 |
| 5.181444248 | 6.458267809 | 6.122493371 |
| 6.565633505 | 6.629131724 | 6.146869918 |
| 6.248391735 | 6.366742973 | 6.118178021 |
| 6.335379532 | 5.119959343 | 6.094370334 |
| 5.096945332 | 5.261670685 | 5.693465922 |
| 5.748384591 | 5.213502893 | 5.27673234  |
| 5.17052987  | 5.214879951 | 5.012218784 |
| 5.86779285  | 5.181207251 | 5.498642222 |
| 5.972724047 | 5.053650218 | 5.269546596 |
| 5.954797426 | 6.318612086 | 7.009389281 |
| 6.408201813 | 8.77117499  | 7.239823782 |
| 5.458869071 | 5.12947225  | 6.355896113 |
| 5.155725996 | 5.342172674 | 5.150426863 |
| 5.151279074 | 5.911212662 | 6.849393462 |
| 5.028634936 | 6.156172298 | 5.700232832 |
| 5.047171204 | 5.587295386 | 5.311096257 |
| 5.300606455 | 6.481637802 | 7.259928495 |
| 6.165446175 | 5.009120234 | 6.398319965 |
| 6.997526313 | 5.600574035 | 6.6885893   |
| 5.625224161 | 5.476655262 | 5.552016804 |
| 5.763216276 | 5.378579396 | 5.299817692 |
| 5.056868827 | 6.368960421 | 6.481071989 |
| 6.203559968 | 5.210647093 | 6.178758149 |
| 5.44961233  | 4.965937024 | 6.714062579 |
| 5.045353122 | 5.316149503 | 5.559283991 |
| 5.791864838 | 5.168807222 | 5.294360819 |
| 6.789383808 | 5.346497012 | 6.591323999 |
| 6.352225355 | 5.675313904 | 6.385199006 |
| 5.769599692 | 5.016742181 | 6.050579432 |
| 5.59572058  | 5.158273678 | 5.278572157 |
| 6.337045583 | 6.112434118 | 6.397801211 |
| 5.266104862 | 6.143156266 | 6.409202087 |
| 6.722734286 | 9.045477883 | 7.980520463 |
| 5.5470626   | 6.53625239  | 6.067326127 |
| 6.931361693 | 5.888274185 | 7.812170673 |
| 5.712125131 | 5.712144268 | 5.156190543 |
| 5.543481029 | 5.151167749 | 5.484319212 |
| 5.021936649 | 5.638053153 | 5.331387073 |
| 5.104523656 | 5.72816762  | 5.217968756 |
| 5.787911159 | 5.434063017 | 5.569697901 |
| 7.834453323 | 6.249188825 | 5.367096364 |

|             |             |             |
|-------------|-------------|-------------|
| 5.562369103 | 5.471848357 | 5.344473265 |
| 5.239579625 | 5.076198243 | 5.216047829 |
| 6.486236023 | 5.558486186 | 5.906355391 |
| 5.923014846 | 5.0070179   | 5.406673648 |
| 5.134216279 | 6.943689241 | 7.071368183 |
| 5.473385688 | 5.045686842 | 5.26295715  |
| 7.675265876 | 6.75744824  | 6.485131909 |
| 5.641418819 | 5.1549311   | 5.590016972 |
| 5.623111336 | 5.436460562 | 6.173524601 |
| 6.205657193 | 5.494794958 | 5.534972169 |
| 5.915663775 | 6.676257048 | 5.060400045 |
| 5.050390852 | 5.404928456 | 5.52975498  |
| 6.179580665 | 5.544688897 | 5.366266577 |
| 5.399527914 | 4.956489324 | 5.445537705 |
| 5.337591606 | 5.194052727 | 5.279780792 |
| 5.356193979 | 4.995632419 | 7.132278179 |
| 5.723785469 | 5.387466682 | 5.911355793 |
| 5.333770325 | 5.491155693 | 5.7986666   |
| 6.599579215 | 5.371715836 | 5.048849871 |
| 5.231335813 | 5.283454223 | 5.566590264 |
| 6.31092295  | 6.506666543 | 6.031740851 |
| 5.640087188 | 5.38296027  | 5.829430681 |
| 5.395499326 | 5.034530144 | 5.135989485 |
| 5.293852572 | 4.965187387 | 6.403998075 |
| 6.866437534 | 5.628256376 | 6.309322418 |
| 5.66723458  | 6.488279828 | 5.533390004 |
| 6.682922182 | 6.547111926 | 5.129494002 |
| 6.831513    | 5.752873652 | 6.706272702 |
| 5.55286402  | 5.397555523 | 5.684875135 |
| 5.791759647 | 6.067113294 | 6.519537886 |
| 5.854409586 | 5.005079282 | 5.844183996 |
| 5.306322005 | 5.041485724 | 5.464039917 |
| 5.930087945 | 5.763970543 | 5.795738222 |
| 5.800315295 | 5.707852541 | 6.119360381 |
| 5.081480701 | 5.10253981  | 5.282986716 |
| 5.921641946 | 5.011191363 | 5.238726878 |
| 5.636040001 | 5.164578332 | 5.53606456  |
| 5.008184535 | 5.576394772 | 5.033913006 |
| 5.228234557 | 5.655448644 | 6.268730428 |
| 5.702921692 | 5.828480497 | 5.513356406 |
| 5.884693889 | 5.211569536 | 5.620427386 |
| 5.137123795 | 5.404748293 | 5.063338926 |
| 6.514685538 | 5.012010688 | 5.319252322 |
| 6.417908786 | 6.507675159 | 5.51497619  |
| 5.507324211 | 5.49852443  | 5.000459945 |
| 6.577991837 | 5.241672804 | 5.74920822  |

|             |             |             |
|-------------|-------------|-------------|
| 6.121362055 | 5.611490494 | 5.671913138 |
| 5.334472589 | 5.923645832 | 6.034248984 |
| 6.005936724 | 5.566253298 | 5.101454518 |
| 5.763494751 | 5.001986374 | 5.924970515 |
| 5.616668371 | 5.60767053  | 5.146812446 |
| 6.598872858 | 5.897928608 | 5.655982919 |
| 5.002211678 | 5.801171702 | 5.06594941  |
| 5.395337903 | 5.770954249 | 4.964799156 |
| 5.877372047 | 5.44315019  | 5.360632639 |
| 6.104383037 | 5.229381566 | 4.973408747 |
| 5.387375461 | 4.956543094 | 6.175960105 |
| 5.528330309 | 5.864565943 | 5.543043605 |
| 5.915556161 | 5.131042075 | 5.996565502 |
| 5.17662889  | 5.827139267 | 6.193835865 |
| 5.12374448  | 5.226009873 | 5.122529294 |
| 4.979831922 | 7.131796194 | 8.012219717 |
| 5.793276253 | 5.016038318 | 5.882687359 |
| 5.912131112 | 5.061449087 | 5.952093158 |
| 7.038899462 | 5.234280786 | 6.931785218 |
| 5.036684059 | 5.828922674 | 5.821475477 |
| 6.616502632 | 5.189092637 | 5.281924116 |
| 6.072524538 | 6.305045277 | 5.595397138 |
| 6.672242714 | 5.380445987 | 6.19651455  |
| 5.804139975 | 5.166529648 | 5.341738466 |
| 5.704696348 | 5.025096713 | 5.629347941 |
| 5.670589335 | 5.456831905 | 4.981791529 |
| 5.176869183 | 5.705594786 | 5.524820524 |
| 5.808581774 | 4.943962693 | 5.288071204 |
| 5.214332111 | 5.053443326 | 5.842510568 |
| 6.925013811 | 7.563208388 | 6.32904552  |
| 7.36351145  | 6.062142204 | 5.353013655 |
| 6.489643942 | 6.013183714 | 5.72840423  |
| 5.542039109 | 4.965502589 | 5.630406959 |
| 6.42886707  | 5.278868922 | 6.003899186 |
| 5.243251826 | 6.006764474 | 5.608288006 |
| 6.032599349 | 5.478113539 | 5.561551896 |
| 5.890995325 | 5.067323918 | 5.097320426 |
| 5.706728883 | 5.717786127 | 5.370584189 |
| 5.532704825 | 5.382812368 | 5.392253809 |
| 6.802916769 | 5.072580117 | 5.324181041 |
| 5.391073847 | 4.970636673 | 7.521180241 |
| 5.380592991 | 5.582717129 | 5.19705896  |
| 5.947828093 | 5.71004846  | 6.347516702 |
| 5.928349627 | 5.709519957 | 6.183954362 |
| 5.771303156 | 5.882719708 | 5.821092749 |
| 5.89990159  | 5.705941367 | 5.581123663 |

|             |             |             |
|-------------|-------------|-------------|
| 5.142920074 | 5.12053457  | 5.060581837 |
| 5.052414668 | 8.436378259 | 6.516182951 |
| 6.435155166 | 5.549795711 | 5.299673842 |
| 5.9499324   | 4.95677763  | 6.038554922 |
| 4.934959814 | 5.320796886 | 6.330649054 |
| 6.060328914 | 5.076051549 | 6.831460631 |
| 5.50527001  | 5.695080781 | 5.538223836 |
| 6.142377475 | 5.611808863 | 5.868939114 |
| 5.428227605 | 5.539725411 | 5.03278182  |
| 5.373862342 | 4.942144574 | 6.332075434 |
| 6.118678747 | 6.072385702 | 5.361984337 |
| 5.487850667 | 5.20663467  | 5.811021158 |
| 5.976517735 | 5.305568971 | 5.555390634 |
| 4.928475249 | 5.094311809 | 5.444686387 |
| 6.638426717 | 6.384560595 | 4.954981251 |
| 5.860737522 | 5.331410449 | 5.920343915 |
| 6.360653281 | 5.362408472 | 5.851101395 |
| 5.755386298 | 6.577651273 | 5.667188086 |
| 6.623209418 | 5.709608354 | 4.933053982 |
| 5.968126824 | 5.828231854 | 5.151649398 |
| 6.091441589 | 5.405772936 | 5.423526131 |
| 5.866755906 | 5.365619964 | 6.130523663 |
| 5.716811485 | 7.05584947  | 5.1649093   |
| 5.477809099 | 5.663679118 | 5.946181667 |
| 5.75065737  | 4.915667879 | 5.758545507 |
| 5.659151838 | 5.684048048 | 5.435321411 |
| 5.125207671 | 5.970024074 | 6.038829695 |
| 6.210156685 | 5.549808789 | 5.896189395 |
| 5.492170952 | 5.51397566  | 4.95720764  |
| 6.046546857 | 5.769470322 | 6.203173407 |
| 5.137253907 | 4.890974243 | 5.207612553 |
| 5.571202437 | 5.344994579 | 5.089206508 |
| 6.072894681 | 4.979304828 | 6.611399774 |
| 6.00233835  | 5.95776095  | 5.405311115 |
| 5.764163254 | 4.98252889  | 5.608017215 |
| 7.335577629 | 5.011692015 | 6.678397359 |
| 5.174716262 | 6.221651769 | 5.621667204 |
| 6.017973171 | 4.990331528 | 6.205997817 |
| 5.443761987 | 5.233404547 | 5.274643862 |
| 6.283560599 | 4.947161871 | 5.638475783 |
| 5.50544123  | 5.68870674  | 5.095553559 |
| 5.435960103 | 5.865483388 | 5.577365094 |
| 5.935742059 | 5.221698006 | 5.344052097 |
| 5.669280038 | 5.847643636 | 5.303116339 |
| 6.034562859 | 6.326669785 | 5.721884282 |
| 5.984952343 | 5.511852724 | 5.797836632 |

|             |             |             |
|-------------|-------------|-------------|
| 6.027865869 | 4.933461173 | 5.170180353 |
| 6.665054109 | 8.210659734 | 5.339578501 |
| 5.738397975 | 5.133888243 | 6.290434997 |
| 5.676815779 | 5.709066752 | 5.650877284 |
| 4.954690462 | 5.112085993 | 5.160431838 |
| 6.400465895 | 5.228926543 | 6.521285589 |
| 5.538325933 | 5.275111519 | 5.291183914 |
| 5.585309686 | 4.970271397 | 5.477281523 |
| 5.96009834  | 5.783168025 | 6.279946888 |
| 5.63628786  | 5.901600251 | 4.992641889 |
| 6.152127198 | 4.980617107 | 5.636895781 |
| 5.577904362 | 6.06706443  | 5.344828459 |
| 6.305862555 | 4.927256909 | 5.017016575 |
| 5.643005122 | 5.961051406 | 5.692541115 |
| 7.750825309 | 6.452005174 | 6.305673894 |
| 6.558565814 | 5.708318219 | 6.895705187 |
| 5.823198718 | 5.910252302 | 5.696301395 |
| 4.931160119 | 5.103441922 | 5.419230067 |
| 5.311617895 | 5.067511258 | 5.773360454 |
| 5.019792613 | 5.433441161 | 5.367535049 |
| 5.500643805 | 5.149404816 | 5.028179069 |
| 5.261788333 | 5.417072389 | 4.994441202 |
| 6.818183228 | 5.315135445 | 5.045029808 |
| 7.229912247 | 5.246736008 | 7.395808348 |
| 5.512215267 | 4.953228262 | 5.95556507  |
| 4.992966509 | 5.417573143 | 6.30024842  |
| 5.400334313 | 5.067907275 | 4.893007468 |
| 5.544237239 | 5.586564959 | 5.353230958 |
| 6.656514902 | 4.910194258 | 6.769136427 |
| 5.173544017 | 5.649777554 | 5.266743869 |
| 5.663244467 | 5.137666116 | 5.446443123 |
| 6.524498709 | 5.196529384 | 4.991223268 |
| 6.733713142 | 6.22331809  | 6.558178315 |
| 5.3125958   | 4.961509109 | 5.658562185 |
| 8.752424989 | 6.377896474 | 8.961153835 |
| 5.135456994 | 5.90603554  | 5.194537353 |
| 6.093614372 | 4.868221201 | 8.829479056 |
| 5.487132037 | 4.942906888 | 6.237241891 |
| 5.781874841 | 6.089000277 | 6.333926204 |
| 5.875920906 | 4.947180735 | 5.69114956  |
| 5.991035331 | 4.935688691 | 5.618712741 |
| 5.442188244 | 5.143650425 | 7.063451026 |
| 5.079631947 | 4.894428491 | 5.369337624 |
| 5.103727408 | 4.998537647 | 5.111923108 |
| 5.763648936 | 4.875010623 | 6.244750204 |
| 5.075478792 | 5.143822134 | 5.615146273 |



|             |             |             |
|-------------|-------------|-------------|
| 5.573773145 | 5.416689419 | 4.995619749 |
| 5.030377411 | 5.260700459 | 5.721130707 |
| 5.383035924 | 5.392189204 | 5.781780346 |
| 6.619340323 | 5.926167777 | 5.147689582 |
| 6.507486168 | 5.345569413 | 5.48059552  |
| 6.097614074 | 5.457617822 | 5.921172878 |
| 5.266404375 | 6.10262856  | 5.513800506 |
| 5.26773176  | 5.912304496 | 6.140466646 |
| 6.579025326 | 6.610992811 | 6.424281577 |
| 5.261393833 | 5.097336146 | 4.995362002 |
| 6.316603737 | 5.814792264 | 4.941058316 |
| 4.88514062  | 5.822634979 | 5.420603263 |
| 5.116539966 | 5.126864792 | 5.373399569 |
| 5.626533302 | 4.950759579 | 5.753988274 |
| 6.263889105 | 5.057801098 | 6.008923651 |
| 5.520742181 | 5.557529411 | 4.942517583 |
| 4.913607367 | 5.27343102  | 5.151945715 |
| 5.769679293 | 5.909648225 | 6.400388666 |
| 5.760326875 | 5.312772008 | 6.884523363 |
| 6.584167306 | 6.736601031 | 6.218017274 |
| 5.219219651 | 4.974614913 | 5.461617178 |
| 6.130700874 | 4.904421835 | 5.410630483 |
| 7.868834    | 4.988141323 | 7.16338693  |
| 5.676559069 | 5.095160684 | 5.108234324 |
| 5.281261288 | 5.899105176 | 5.539899921 |
| 6.010766503 | 5.321245931 | 6.312351816 |
| 5.966333605 | 5.269608396 | 5.755175912 |
| 5.507652195 | 5.298011172 | 5.276856263 |
| 5.051149311 | 4.943135958 | 5.903722451 |
| 5.923700459 | 4.91905829  | 5.672566782 |
| 4.946910074 | 5.461250543 | 6.282845531 |
| 6.157533072 | 5.801794813 | 5.661798466 |
| 5.203396447 | 4.902987212 | 5.751274437 |
| 5.993244973 | 5.471823306 | 5.442299796 |
| 5.65520965  | 4.908573877 | 5.317872317 |
| 5.784963512 | 5.477471601 | 4.928087039 |
| 5.55634344  | 5.174393752 | 5.030988042 |
| 6.373881895 | 4.950778783 | 5.353555198 |
| 4.846518565 | 5.162528962 | 5.333542779 |
| 5.403902336 | 5.028944367 | 5.814593618 |
| 6.152131181 | 5.715119527 | 5.070598497 |
| 5.617427233 | 5.231949129 | 5.163927449 |
| 5.140440279 | 7.101257886 | 6.17244199  |
| 5.200500476 | 5.029823274 | 5.642702202 |
| 5.417811437 | 5.060144549 | 5.66102558  |
| 5.075500983 | 5.007325576 | 5.532631268 |

|             |             |             |
|-------------|-------------|-------------|
| 5.236097002 | 5.173098693 | 5.708777985 |
| 5.588398012 | 4.988224591 | 5.67139092  |
| 5.283271311 | 5.327229375 | 5.389944934 |
| 6.004383087 | 4.917833597 | 5.016097146 |
| 6.040549123 | 4.887325424 | 5.90673555  |
| 7.072827027 | 6.191333015 | 6.403938133 |
| 5.516786184 | 5.490016949 | 5.546516184 |
| 5.914203695 | 4.874730408 | 6.192399761 |
| 5.044817809 | 5.013096133 | 5.270396016 |
| 5.606745941 | 5.62728503  | 5.691729874 |
| 7.131021775 | 6.005488898 | 4.964625694 |
| 6.048338821 | 4.892808931 | 4.959529271 |
| 5.203129909 | 5.429375958 | 5.007183024 |
| 5.64772831  | 4.980458588 | 5.600157717 |
| 5.627591183 | 4.905133391 | 5.565511187 |
| 6.043507004 | 4.939928648 | 5.453982875 |
| 5.127033118 | 5.080333933 | 5.504361729 |
| 6.081807508 | 5.535701092 | 6.685759518 |
| 7.01954201  | 6.391073401 | 7.626216124 |
| 6.326394882 | 5.783214839 | 4.968442839 |
| 5.0050606   | 5.404548492 | 5.733522098 |
| 6.87065927  | 6.079222002 | 4.838779823 |
| 4.851262121 | 5.565900018 | 5.268178425 |
| 6.814631131 | 5.039199674 | 5.595622419 |
| 5.140958404 | 5.382176752 | 5.154726205 |
| 7.053823688 | 6.151446041 | 6.599992433 |
| 5.238333571 | 5.88211107  | 5.486948504 |
| 5.846761713 | 5.011276523 | 5.482063212 |
| 6.063034532 | 5.350329172 | 4.960343899 |
| 5.095640732 | 4.913912289 | 4.888258424 |
| 5.860533147 | 5.009149733 | 4.910292554 |
| 5.302060575 | 5.318498574 | 5.358157276 |
| 4.917230461 | 5.400317566 | 6.045189654 |
| 6.222165579 | 6.229942052 | 5.334904738 |
| 5.762245251 | 5.292868894 | 5.461071957 |
| 7.148783335 | 4.95424271  | 7.202972889 |
| 4.970495175 | 4.847479296 | 5.584668684 |
| 5.526461599 | 4.954352574 | 5.378881273 |
| 5.481348475 | 5.695938683 | 5.298357683 |
| 6.060850354 | 5.851705864 | 5.833713055 |
| 4.884069293 | 5.534196853 | 5.609378363 |
| 6.286222458 | 5.490429606 | 5.941070275 |
| 5.903962113 | 5.583353901 | 5.934784328 |
| 5.795747319 | 5.161512111 | 4.943523229 |
| 5.110303312 | 6.867794707 | 5.370440802 |
| 6.013809348 | 5.528225469 | 5.64661474  |

|             |             |             |
|-------------|-------------|-------------|
| 4.928629873 | 5.20943449  | 4.875616241 |
| 5.541522113 | 4.998599716 | 5.603306142 |
| 5.042165571 | 4.9182823   | 5.655529448 |
| 5.452284564 | 4.943481654 | 5.103186378 |
| 5.461310846 | 6.235140062 | 5.900327881 |
| 5.729514787 | 5.835547959 | 5.84062135  |
| 6.064583493 | 5.29701943  | 5.589207249 |
| 4.896403618 | 6.132388385 | 5.736068473 |
| 5.625809984 | 5.070232847 | 4.862833797 |
| 4.883870105 | 4.883569106 | 5.254809185 |
| 6.116942761 | 4.953154566 | 5.157029949 |
| 5.317552315 | 6.060203605 | 5.620064955 |
| 5.69952326  | 5.521409849 | 5.468137542 |
| 5.667768513 | 5.727161458 | 6.455585475 |
| 5.112222646 | 5.318137901 | 5.057595188 |
| 5.639872435 | 5.454520518 | 5.717833186 |
| 4.934525316 | 9.127141157 | 7.340470282 |
| 4.951004097 | 4.968330413 | 4.865322436 |
| 6.025417521 | 6.012028766 | 6.186510418 |
| 6.014008222 | 5.429588302 | 4.999953594 |
| 5.725423335 | 4.920068635 | 5.063010721 |
| 5.781630865 | 5.012894192 | 5.774652376 |
| 5.734902343 | 5.146809415 | 5.563457891 |
| 5.519510873 | 5.022738466 | 5.539119689 |
| 5.249571941 | 5.043479393 | 5.561728935 |
| 5.438729722 | 4.885953992 | 6.510674522 |
| 5.491169101 | 5.381692914 | 5.410380782 |
| 6.273980227 | 7.711344289 | 7.63692962  |
| 5.716198608 | 4.930711882 | 5.732797083 |
| 5.673943265 | 4.858706791 | 5.748027691 |
| 4.821036005 | 6.080228819 | 6.171866114 |
| 5.960552509 | 5.231146393 | 4.99230553  |
| 6.497742617 | 5.51233106  | 5.742745953 |
| 5.098398663 | 4.812384627 | 5.544039514 |
| 4.964932399 | 5.305291809 | 5.407902447 |
| 5.575487717 | 4.872441688 | 4.893301443 |
| 4.959762559 | 6.052219408 | 5.48200924  |
| 7.239687292 | 5.772395306 | 6.163833827 |
| 6.682856408 | 6.576659506 | 6.345362636 |
| 5.354575258 | 5.294915603 | 6.721964481 |
| 7.413011458 | 6.633053092 | 7.469284572 |
| 5.445020354 | 6.222956584 | 5.031441513 |
| 4.97949618  | 5.091234983 | 5.439551154 |
| 6.478375317 | 5.063912447 | 5.84452949  |
| 5.004083704 | 5.316918069 | 5.301446605 |
| 5.118975986 | 5.464110952 | 7.005585827 |

|             |             |             |
|-------------|-------------|-------------|
| 5.601194469 | 5.768841541 | 6.085872554 |
| 6.879821252 | 6.590577412 | 4.91357478  |
| 6.141457047 | 4.843354656 | 5.571306429 |
| 5.07062129  | 5.050631579 | 5.290204295 |
| 5.58719425  | 4.841264907 | 6.604908105 |
| 5.093348455 | 5.003698131 | 5.288150854 |
| 6.48748804  | 6.678106589 | 5.432310103 |
| 5.140992695 | 4.802322616 | 4.902355585 |
| 5.789044037 | 6.096356649 | 5.963389585 |
| 6.170043538 | 5.997252232 | 4.901410118 |
| 6.057354172 | 5.185520711 | 4.932813128 |
| 5.76170223  | 4.948772291 | 6.487264576 |
| 4.809230757 | 5.628955583 | 5.793057226 |
| 4.930218176 | 5.091881533 | 5.396647019 |
| 6.61882012  | 5.998222417 | 5.911208503 |
| 6.086896587 | 4.981695302 | 5.38423285  |
| 6.383832113 | 6.254458758 | 4.817961202 |
| 6.619623203 | 5.954656689 | 4.831017166 |
| 5.877321184 | 5.742763848 | 6.128976794 |
| 5.035688499 | 5.583295036 | 4.810468676 |
| 5.563773623 | 5.163572823 | 5.075711556 |
| 5.620213821 | 5.284776468 | 5.169919443 |
| 5.942407249 | 5.025646637 | 5.00887817  |
| 5.050531704 | 5.607390371 | 5.975810871 |
| 5.325260005 | 5.348881722 | 4.940239146 |
| 5.563196329 | 5.282172463 | 5.814163554 |
| 7.480463582 | 5.951251441 | 6.078129372 |
| 6.580000184 | 5.954271438 | 6.159329139 |
| 5.645449431 | 4.97215357  | 5.884661497 |
| 5.056883998 | 5.583149504 | 5.175973357 |
| 5.162042063 | 5.169340059 | 5.113836019 |
| 6.23612777  | 5.508172397 | 4.796141838 |
| 6.063668372 | 5.246336528 | 5.99694954  |
| 5.248890347 | 4.875215339 | 5.481521172 |
| 5.838470706 | 4.955755823 | 7.165673449 |
| 6.524446731 | 5.90958215  | 5.099589755 |
| 6.380728522 | 5.098187987 | 5.8716618   |
| 5.035410931 | 5.781062863 | 5.640834832 |
| 6.602952627 | 5.901665482 | 5.717192292 |
| 8.546084209 | 5.838110641 | 4.854158634 |
| 5.233737939 | 4.842238759 | 5.333048793 |
| 5.430224989 | 4.959665369 | 5.865800382 |
| 6.015070042 | 4.863829509 | 5.748234945 |
| 5.279910747 | 4.859173802 | 5.168748671 |
| 5.941934611 | 5.786219685 | 5.556676109 |
| 5.556543855 | 6.208209466 | 4.866706259 |

|             |             |             |
|-------------|-------------|-------------|
| 5.241709482 | 8.075368444 | 7.988702149 |
| 6.872225323 | 6.288939225 | 7.026154398 |
| 5.566886081 | 4.965599456 | 5.69775328  |
| 6.575999757 | 8.178705587 | 6.380900456 |
| 4.781875004 | 5.505436811 | 5.818052268 |
| 5.493481804 | 4.965958545 | 5.090223034 |
| 6.007202683 | 5.656240962 | 6.070718489 |
| 6.170673467 | 4.823804691 | 6.071125395 |
| 6.876492467 | 7.094306188 | 6.544460918 |
| 5.170786674 | 5.359492923 | 4.959510442 |
| 5.779155083 | 5.325304861 | 5.832659747 |
| 6.359367338 | 5.009805754 | 6.102235101 |
| 5.026248655 | 5.630835169 | 6.174538462 |
| 5.540692699 | 4.905939335 | 6.15081938  |
| 5.876454247 | 5.462531573 | 5.391587971 |
| 5.658097046 | 5.273576821 | 5.134096687 |
| 5.562076885 | 5.832706929 | 6.235062742 |
| 5.455832316 | 5.456435648 | 5.515173049 |
| 4.915153585 | 7.265454945 | 6.461839397 |
| 5.054078956 | 5.039919195 | 5.387427141 |
| 5.494946197 | 4.908533729 | 5.770673103 |
| 5.5144743   | 4.818327364 | 5.393397643 |
| 5.915806751 | 6.839184207 | 6.979617013 |
| 5.737633283 | 4.967171901 | 5.782647218 |
| 6.033022022 | 4.983017885 | 6.060600152 |
| 5.701646084 | 5.768220295 | 5.174368968 |
| 5.14900262  | 5.304079943 | 4.941374826 |
| 7.232019413 | 6.505657797 | 5.090059625 |
| 5.392574769 | 6.24168168  | 6.346231194 |
| 4.848361042 | 5.547725021 | 5.333696789 |
| 4.825695115 | 4.822229736 | 5.40291199  |
| 5.971899538 | 5.484720927 | 4.994304685 |
| 5.49086316  | 6.009658921 | 4.784201061 |
| 5.184705122 | 5.774270356 | 5.856263874 |
| 5.996689499 | 5.449072604 | 5.744571315 |
| 5.257530283 | 5.142464747 | 5.126536221 |
| 5.988900575 | 4.833992641 | 5.658781229 |
| 6.052718933 | 6.059513321 | 5.813795499 |
| 5.524454085 | 4.943935254 | 5.33194187  |
| 5.730512682 | 6.029043134 | 5.014471491 |
| 5.118767388 | 5.986836888 | 5.594659223 |
| 5.075110581 | 5.024586926 | 5.232409439 |
| 6.012832024 | 5.280161999 | 6.786175285 |
| 5.037854469 | 5.968015409 | 5.765699017 |
| 4.911268408 | 5.531795026 | 5.1803865   |
| 6.926702899 | 7.17793752  | 5.964995495 |

|             |             |             |
|-------------|-------------|-------------|
| 5.486397807 | 5.35713287  | 4.929318097 |
| 5.474599847 | 4.800634397 | 4.989362003 |
| 5.659769457 | 5.503806143 | 5.181171223 |
| 5.558064239 | 4.932387396 | 4.896982167 |
| 5.426964422 | 5.022299197 | 5.429721747 |
| 5.615978946 | 4.844938563 | 5.577770132 |
| 6.99416778  | 5.814041854 | 6.534874686 |
| 5.373971081 | 5.19941897  | 5.648223272 |
| 6.146496538 | 5.324154032 | 6.08264868  |
| 6.118618158 | 6.437887633 | 5.626572336 |
| 5.971983696 | 5.654099403 | 6.254977868 |
| 4.783925829 | 6.4262324   | 6.18798094  |
| 6.708648985 | 5.872815348 | 7.042850637 |
| 5.432168566 | 6.067685308 | 5.384817505 |
| 6.216860127 | 4.9153683   | 4.901329678 |
| 6.405390707 | 4.817193734 | 5.419962842 |
| 5.109594233 | 5.174405585 | 6.027187042 |
| 6.247624777 | 6.456111403 | 5.608064922 |
| 5.455889731 | 5.630576455 | 5.916582099 |
| 8.966059415 | 4.843675279 | 5.628316387 |
| 6.118091933 | 6.732100546 | 6.296478543 |
| 5.584253469 | 6.15970834  | 5.910843084 |
| 5.938492909 | 5.41512429  | 6.486578953 |
| 5.650495515 | 6.66463373  | 7.812000936 |
| 5.293192264 | 5.453868228 | 5.180766356 |
| 5.620262768 | 5.80084172  | 6.22879482  |
| 5.707654343 | 4.853744994 | 5.049574113 |
| 5.288647501 | 5.287903412 | 4.861081378 |
| 4.763384979 | 6.370931232 | 6.274128866 |
| 5.203699907 | 5.293276022 | 4.924778882 |
| 5.486146745 | 5.100333858 | 4.964197055 |
| 8.179071394 | 4.81775224  | 6.728130655 |
| 5.901156261 | 5.344150665 | 5.532752733 |
| 4.794440054 | 5.275487487 | 4.938409984 |
| 6.034349443 | 5.067494849 | 5.531838467 |
| 5.095971219 | 6.032308239 | 5.885740825 |
| 5.568085017 | 4.824919389 | 5.454045227 |
| 6.289527473 | 4.80360432  | 5.716157504 |
| 5.408163047 | 5.728352225 | 5.983945151 |
| 5.934819049 | 5.743647574 | 5.8748189   |
| 4.830572892 | 5.55963645  | 6.409551102 |
| 5.301698597 | 5.01146354  | 5.562837447 |
| 5.16093783  | 5.603163456 | 4.849338568 |
| 5.327291443 | 5.722173423 | 6.464274061 |
| 5.630713461 | 5.245692407 | 5.117246666 |
| 5.231496054 | 5.281973295 | 4.827797073 |

|             |             |             |
|-------------|-------------|-------------|
| 5.715959396 | 5.315785418 | 5.163423592 |
| 5.049073451 | 5.573431787 | 6.172801084 |
| 5.820441709 | 5.372531367 | 5.100519515 |
| 7.230354967 | 5.099996416 | 6.507333369 |
| 5.20875965  | 4.910460103 | 4.885801223 |
| 6.267933523 | 6.225716985 | 6.089853809 |
| 5.324283832 | 4.88476934  | 5.067205158 |
| 6.577982935 | 4.786645212 | 6.075064587 |
| 5.225492144 | 4.884519799 | 6.601436735 |
| 5.844348776 | 5.243898087 | 4.747560183 |
| 5.525161183 | 5.802925269 | 4.924664616 |
| 5.871335259 | 6.022748886 | 5.617537973 |
| 5.381991496 | 5.012105227 | 6.298920078 |
| 5.167469154 | 5.505384591 | 4.871242017 |
| 5.363581611 | 5.243337668 | 5.599005831 |
| 6.169408928 | 4.845469633 | 5.868835695 |
| 5.980372675 | 4.852036936 | 5.53761975  |
| 7.257139978 | 5.000763617 | 5.138189988 |
| 6.163240071 | 4.777894845 | 5.975579384 |
| 5.358231019 | 5.115917023 | 5.57044996  |
| 6.700692424 | 4.871431682 | 5.739008896 |
| 5.425910175 | 5.085271443 | 4.984482062 |
| 6.07459262  | 5.773200503 | 5.287850164 |
| 5.161948697 | 5.063783914 | 7.306929834 |
| 5.40036157  | 5.222310179 | 4.952368751 |
| 5.641987764 | 4.912857427 | 5.245583022 |
| 6.432287735 | 6.550487643 | 6.280456725 |
| 5.175011573 | 7.083091019 | 4.837283371 |
| 5.63749212  | 5.472514199 | 6.133765591 |
| 5.969314854 | 5.23922613  | 4.919732715 |
| 5.99530885  | 5.574144198 | 5.752565706 |
| 5.172600527 | 5.050098744 | 5.256195283 |
| 6.328886056 | 5.184698048 | 5.711958619 |
| 5.290716817 | 4.792845923 | 5.166294924 |
| 5.371148963 | 4.781868651 | 5.367250036 |
| 5.662069943 | 7.377619865 | 6.809135337 |
| 5.678185618 | 4.821845744 | 5.045514671 |
| 6.432507026 | 6.270578514 | 5.819024832 |
| 4.844669925 | 4.795958517 | 5.689468506 |
| 6.549335916 | 5.852373971 | 5.617804507 |
| 5.061564272 | 4.93151524  | 5.678180656 |
| 5.673656823 | 6.116701144 | 6.22455752  |
| 5.880233447 | 5.745681971 | 5.351712976 |
| 5.450508133 | 5.265191812 | 5.803324194 |
| 5.459807802 | 5.316159666 | 5.340076551 |
| 5.930249397 | 5.26928065  | 5.639856047 |

|             |             |             |
|-------------|-------------|-------------|
| 6.500981597 | 5.594725865 | 5.939133469 |
| 5.41391745  | 6.451088501 | 7.359205526 |
| 4.808519439 | 5.360881711 | 6.097402294 |
| 4.910177633 | 4.844997719 | 5.122232403 |
| 6.412796946 | 4.914993156 | 5.76808925  |
| 6.668363136 | 6.318440535 | 6.464159042 |
| 5.688521846 | 4.850199989 | 5.073429501 |
| 6.321119655 | 5.314348429 | 6.502951728 |
| 5.68772732  | 5.025958194 | 5.10450044  |
| 5.847424507 | 5.543736017 | 6.134906028 |
| 5.642770155 | 5.508257291 | 5.519204234 |
| 7.776022819 | 5.426823862 | 4.88644017  |
| 5.649256587 | 5.022548433 | 5.793927286 |
| 6.261632578 | 5.065282135 | 5.847909481 |
| 4.887720953 | 5.923700409 | 6.176379517 |
| 5.613375216 | 4.782961808 | 5.15891018  |
| 6.136124064 | 5.085970125 | 5.160542851 |
| 5.767242872 | 5.922332781 | 5.854883276 |
| 4.890312109 | 4.960233926 | 5.861481512 |
| 5.6385084   | 4.921552009 | 5.411666422 |
| 4.938180439 | 5.244002502 | 5.242185132 |
| 4.818631391 | 5.815770433 | 4.909511367 |
| 5.31444234  | 5.298065019 | 5.71141117  |
| 5.228863775 | 5.39176766  | 5.489143164 |
| 5.713328579 | 4.759308698 | 5.404842446 |
| 5.89937317  | 5.415354415 | 5.510716982 |
| 6.217389569 | 4.866213433 | 5.156009805 |
| 5.247658496 | 4.836704334 | 5.031545301 |
| 5.676332035 | 4.965288929 | 4.911143275 |
| 6.648580047 | 4.758125185 | 5.028454202 |
| 5.08823604  | 5.02482072  | 5.02898644  |
| 4.762150734 | 5.055028471 | 4.97163306  |
| 5.924527099 | 4.724650969 | 5.872705655 |
| 5.641952284 | 4.839748853 | 5.874284481 |
| 5.929598829 | 4.81592379  | 5.12597241  |
| 5.321879701 | 5.281461408 | 5.333949217 |
| 5.324957211 | 5.336373245 | 5.062541037 |
| 5.164693918 | 4.986144271 | 5.007227462 |
| 5.702996557 | 4.996876366 | 5.032174406 |
| 5.182140079 | 4.795831752 | 5.129991082 |
| 5.0955959   | 5.207954353 | 5.466580879 |
| 5.517342663 | 4.988057583 | 5.207783809 |
| 5.350573811 | 5.057601617 | 5.295473539 |
| 5.305997592 | 5.320232538 | 5.380288615 |
| 6.663104955 | 4.850883321 | 5.669277355 |
| 4.9329506   | 4.850559156 | 4.963110425 |



|             |             |             |
|-------------|-------------|-------------|
| 4.833939356 | 5.006645904 | 5.573534966 |
| 5.242743882 | 5.292682619 | 5.82624289  |
| 6.330194631 | 5.859008495 | 6.643840494 |
| 5.735900951 | 4.783894843 | 5.558764469 |
| 5.591282031 | 6.180780714 | 7.40657135  |
| 5.728071584 | 4.770378935 | 5.542898318 |
| 7.366531533 | 6.522535851 | 7.122618262 |
| 6.146091235 | 4.763720231 | 5.020778443 |
| 5.352145482 | 4.846970378 | 5.173091247 |
| 6.240742751 | 4.817625208 | 6.203785568 |
| 5.489484707 | 4.924134352 | 4.880614293 |
| 5.427605728 | 4.705265772 | 5.967769671 |
| 4.738085907 | 6.032656286 | 5.778082376 |
| 5.898617565 | 5.332873842 | 5.930682695 |
| 4.811620344 | 5.44355778  | 6.576234859 |
| 6.266166437 | 4.913980764 | 5.123276382 |
| 7.733649374 | 5.511641469 | 6.769201405 |
| 6.024713709 | 5.017242524 | 5.880370965 |
| 5.76551483  | 5.187997671 | 6.049447728 |
| 5.22924153  | 5.049582631 | 4.970772229 |
| 7.481359251 | 7.320746835 | 4.736603503 |
| 4.88017002  | 5.193044773 | 5.31692183  |
| 5.419326075 | 4.908661094 | 4.777378871 |
| 5.184398852 | 4.700042887 | 5.281822399 |
| 5.555026387 | 5.654513186 | 6.33909292  |
| 4.897008203 | 6.020824172 | 5.701871165 |
| 5.677826617 | 4.906364164 | 5.560552648 |
| 5.1736081   | 6.142906275 | 5.140184749 |
| 6.469627289 | 5.197363885 | 7.317634356 |
| 9.497555124 | 4.864312073 | 8.80212336  |
| 5.353213847 | 7.547924344 | 6.558496698 |
| 5.90682087  | 4.989437289 | 4.848288234 |
| 6.042730188 | 5.419350477 | 4.831135584 |
| 5.097606047 | 4.760530759 | 5.343206428 |
| 4.905947668 | 5.267183966 | 5.556108759 |
| 5.785108058 | 4.844461421 | 5.552809103 |
| 6.830380189 | 6.062051678 | 5.984542733 |
| 4.771414392 | 5.257127286 | 5.744727696 |
| 6.179220728 | 4.731331221 | 5.056056807 |
| 6.216753926 | 4.775905803 | 5.303616146 |
| 5.378767895 | 4.914846613 | 4.821249351 |
| 5.153297729 | 5.52234622  | 6.494691929 |
| 6.025035677 | 5.11812707  | 5.309688315 |
| 6.850583189 | 4.779350924 | 7.382776018 |
| 5.514782798 | 5.740819731 | 5.271115991 |
| 6.793763235 | 5.825618062 | 7.361190993 |

|             |             |             |
|-------------|-------------|-------------|
| 5.104690045 | 4.76440358  | 5.182688689 |
| 4.848796486 | 5.385650285 | 6.179291154 |
| 4.791869231 | 5.22827652  | 5.926187608 |
| 5.515840709 | 5.346326622 | 5.853168468 |
| 4.792769392 | 4.932898849 | 5.147207456 |
| 5.267242436 | 5.473596735 | 5.875169348 |
| 5.28820545  | 4.78918163  | 4.798179695 |
| 5.030126994 | 4.759765862 | 4.991775658 |
| 4.854877201 | 5.751274626 | 5.250578335 |
| 4.808996132 | 4.810848623 | 5.764412566 |
| 6.064639081 | 4.756555756 | 6.054987319 |
| 5.858908608 | 5.799030633 | 5.803662926 |
| 6.074996253 | 5.299024484 | 5.102410756 |
| 4.923885032 | 5.328396701 | 5.993651385 |
| 6.36485558  | 4.95082346  | 5.511089195 |
| 5.37031782  | 5.032949039 | 4.81617732  |
| 5.066760427 | 4.942014992 | 5.062516728 |
| 5.136926078 | 5.539783505 | 5.31014409  |
| 5.638638864 | 5.742621591 | 5.253053185 |
| 6.462394587 | 5.96994807  | 5.832615063 |
| 4.892771488 | 5.374385665 | 5.047445845 |
| 7.219735296 | 6.129496246 | 6.405872468 |
| 4.7571987   | 6.633490165 | 6.359232968 |
| 5.651873223 | 5.550958312 | 5.919846939 |
| 6.630974049 | 5.420120752 | 6.58352094  |
| 5.330500416 | 5.077853218 | 4.889631765 |
| 5.015419118 | 4.824975302 | 4.96194972  |
| 5.596680448 | 5.057359709 | 5.812608274 |
| 6.002182848 | 4.778306279 | 5.965709209 |
| 5.431190368 | 5.473424652 | 5.297371015 |
| 5.504277835 | 5.551523203 | 6.031942688 |
| 4.685769666 | 4.779325174 | 4.942372978 |
| 5.822249919 | 4.736189088 | 4.821717063 |
| 6.576766948 | 6.782058527 | 6.710021321 |
| 4.970599792 | 5.168871137 | 4.924380559 |
| 6.672949854 | 6.976250072 | 6.956099152 |
| 6.762106165 | 6.283403423 | 7.30790314  |
| 5.309640063 | 4.923459944 | 5.738751073 |
| 5.319937336 | 4.810288989 | 4.883273236 |
| 6.118489979 | 5.330205791 | 6.055357064 |
| 5.613474062 | 5.54224513  | 4.765086353 |
| 5.329034017 | 4.838108328 | 5.359321544 |
| 4.742570268 | 6.812952877 | 5.044962724 |
| 5.958635896 | 5.595001291 | 5.598365665 |
| 5.709880275 | 6.248602705 | 6.322010401 |
| 6.367923583 | 4.782638214 | 6.347986842 |

|             |             |             |
|-------------|-------------|-------------|
| 6.388449509 | 5.110048559 | 4.705745623 |
| 5.611010296 | 5.454359566 | 5.337224918 |
| 5.05668399  | 5.464534318 | 5.989475271 |
| 5.372011127 | 4.689037643 | 4.68788779  |
| 4.691453143 | 6.044889588 | 4.97090311  |
| 6.30763008  | 5.507632487 | 4.742906311 |
| 4.88111885  | 4.69024497  | 4.893069012 |
| 5.453219499 | 4.778736096 | 5.68328908  |
| 4.698538589 | 5.566301506 | 5.24289735  |
| 6.87293517  | 5.964228001 | 6.159142308 |
| 5.559521204 | 5.676426223 | 4.689807542 |
| 5.017455001 | 5.065975226 | 5.476620842 |
| 4.743625565 | 4.988859595 | 5.473720284 |
| 5.138862078 | 5.463858124 | 5.048760633 |
| 5.866789751 | 5.152820208 | 5.140796056 |
| 5.7914319   | 5.819364113 | 5.583905721 |
| 5.405845465 | 4.717384198 | 5.140323783 |
| 5.98863039  | 5.563996344 | 5.546118866 |
| 7.095377661 | 4.731713101 | 6.033096824 |
| 5.405008937 | 5.91175384  | 6.466620009 |
| 5.074590994 | 4.66482841  | 5.059555203 |
| 7.071555774 | 6.195687706 | 4.999141811 |
| 6.326430506 | 4.981553705 | 5.012380369 |
| 4.675993913 | 4.903309804 | 5.350342143 |
| 4.646127575 | 4.807062592 | 4.819545292 |
| 4.983643877 | 5.789756103 | 4.796391578 |
| 6.243370052 | 6.345069374 | 5.214516485 |
| 4.979114768 | 5.380085801 | 5.243419791 |
| 5.291531306 | 5.052345431 | 4.893103585 |
| 4.703474926 | 6.107760379 | 6.01495844  |
| 6.422802516 | 4.966090613 | 6.146828684 |
| 5.796498531 | 5.070502478 | 4.700193848 |
| 7.078377239 | 5.817907877 | 7.005054737 |
| 5.708632806 | 5.529225462 | 5.165895238 |
| 4.830650388 | 4.975104493 | 6.199402135 |
| 5.523049928 | 4.812098522 | 5.169786589 |
| 6.266662042 | 5.452801511 | 6.527834725 |
| 4.890528878 | 5.060598281 | 5.725426009 |
| 4.94140542  | 7.562938403 | 7.131438012 |
| 11.3405555  | 9.133934755 | 8.107244416 |
| 5.930354512 | 4.714189652 | 5.962866983 |
| 4.750582456 | 4.946504012 | 5.002945462 |
| 5.777308853 | 5.136682555 | 5.294124773 |
| 5.166701866 | 4.977585029 | 5.201234371 |
| 5.86579002  | 5.496872768 | 5.660989233 |
| 4.716823254 | 5.694695399 | 5.424737789 |

|             |             |             |
|-------------|-------------|-------------|
| 5.493239223 | 5.058973139 | 7.835809463 |
| 5.49370764  | 5.08164042  | 5.22486084  |
| 5.211041568 | 4.68876048  | 4.964302135 |
| 5.6836544   | 4.643655669 | 5.873823519 |
| 6.694170693 | 6.166412404 | 6.039969353 |
| 7.108709545 | 6.198568731 | 5.464869776 |
| 6.243179862 | 4.918845326 | 6.018946311 |
| 5.526000558 | 5.45171186  | 5.530720366 |
| 4.812250342 | 5.178756017 | 5.142532634 |
| 6.483992345 | 5.225715943 | 4.707165993 |
| 6.319190191 | 5.691407981 | 5.684191576 |
| 6.449153096 | 7.250753248 | 6.953057083 |
| 4.782487672 | 5.734745329 | 5.434062863 |
| 4.847239354 | 4.67521437  | 6.361022963 |
| 5.527114675 | 4.741153458 | 5.129971122 |
| 5.1872028   | 5.099342025 | 5.190486586 |
| 5.936130399 | 4.712745794 | 6.556358311 |
| 5.711769357 | 5.325983027 | 4.784669006 |
| 5.434973272 | 4.949241154 | 4.973785454 |
| 5.495184668 | 5.539349554 | 4.721046334 |
| 5.919946437 | 4.664722398 | 5.245544436 |
| 6.983807294 | 5.417836315 | 5.426732502 |
| 5.844591451 | 5.790737737 | 6.595649332 |
| 5.52753427  | 5.502604686 | 5.745802937 |
| 5.254182641 | 5.438086721 | 5.70597971  |
| 5.684166883 | 5.07236226  | 5.116542109 |
| 5.624499663 | 4.883079531 | 5.693647301 |
| 4.916780999 | 4.988388458 | 6.344467049 |
| 4.960242687 | 5.234463603 | 4.716383843 |
| 5.840083118 | 4.709118321 | 6.105955532 |
| 4.808557911 | 5.78150459  | 5.505570258 |
| 5.024014756 | 5.868259539 | 5.376029764 |
| 5.246815077 | 4.928760328 | 4.74413126  |
| 4.995393697 | 4.900714485 | 5.008516038 |
| 4.780931063 | 5.933428328 | 5.842871669 |
| 4.950704266 | 4.670601245 | 5.337886973 |
| 4.673371806 | 5.2266835   | 4.782501964 |
| 5.613672083 | 8.145832784 | 9.32194909  |
| 5.235299134 | 4.645694076 | 4.834505832 |
| 5.864766205 | 5.730766552 | 5.466655029 |
| 5.834106508 | 5.067543927 | 5.16846873  |
| 6.949449219 | 5.481442604 | 4.709927349 |
| 6.232724409 | 7.385241116 | 4.777121591 |
| 5.838631932 | 6.514424035 | 6.573927725 |
| 4.879654141 | 5.160216212 | 4.794677582 |
| 5.093799662 | 5.120771229 | 4.808227644 |

|             |             |             |
|-------------|-------------|-------------|
| 6.184377496 | 4.749162941 | 5.718216492 |
| 6.287466968 | 4.845584605 | 5.033991469 |
| 5.524460943 | 5.659674994 | 5.347270815 |
| 5.18738909  | 4.977956676 | 4.984238326 |
| 5.072355791 | 4.947176798 | 4.710530682 |
| 4.637256263 | 5.157317414 | 5.823498452 |
| 5.157875505 | 4.957274908 | 5.590293264 |
| 6.339289992 | 5.386301752 | 5.730733703 |
| 4.826494683 | 4.642485897 | 5.383679677 |
| 6.93917583  | 5.974634522 | 6.133240329 |
| 5.699249735 | 5.17454638  | 5.607759213 |
| 5.634476742 | 5.493836581 | 4.611024046 |
| 6.288788499 | 5.936397631 | 5.299551679 |
| 5.945189646 | 5.31988685  | 5.481580287 |
| 5.698511895 | 5.881922308 | 5.722304877 |
| 5.588683705 | 5.336537011 | 4.963809273 |
| 6.187658586 | 5.616104313 | 5.83538568  |
| 6.868822789 | 5.580328825 | 6.705405893 |
| 5.75960852  | 5.15388428  | 5.431473142 |
| 5.765293683 | 5.170145743 | 5.943023882 |
| 5.744238688 | 4.687646387 | 5.576778771 |
| 5.405803062 | 4.658256424 | 5.317716928 |
| 6.255393912 | 4.683827716 | 5.231272184 |
| 5.765842733 | 4.652937383 | 5.719989735 |
| 6.373389662 | 5.336551074 | 4.631329842 |
| 5.067724166 | 4.951788322 | 5.789712132 |
| 5.034083144 | 4.732227035 | 5.816392429 |
| 5.004990949 | 5.013388382 | 5.521875784 |
| 4.710795796 | 5.245979268 | 4.957650179 |
| 4.740446761 | 5.205097348 | 5.63405476  |
| 5.324303908 | 5.012341811 | 5.470011677 |
| 5.883482113 | 4.80606758  | 5.407314193 |
| 4.619714318 | 4.755428748 | 5.08570114  |
| 5.402299344 | 6.518052824 | 5.771341756 |
| 4.637403064 | 6.345333625 | 5.529566858 |
| 4.765998074 | 5.810257721 | 5.185621402 |
| 4.683174015 | 5.488456229 | 5.791504955 |
| 5.743353836 | 5.206971458 | 5.795936869 |
| 4.761547289 | 4.719486208 | 5.070209816 |
| 5.554859271 | 5.008077339 | 4.672333998 |
| 5.261874541 | 4.741153396 | 4.822868302 |
| 5.511204812 | 5.847204762 | 5.735436402 |
| 6.56962834  | 5.713823899 | 7.373139962 |
| 5.216839934 | 4.72326351  | 4.841287425 |
| 4.960491125 | 5.349165287 | 5.08800329  |
| 6.221050203 | 6.312811081 | 5.1617582   |

|             |             |             |
|-------------|-------------|-------------|
| 6.332126755 | 6.239136205 | 8.275139312 |
| 5.645128744 | 5.6649985   | 5.430025261 |
| 5.088086439 | 4.660335638 | 5.026999694 |
| 4.902613034 | 5.65506286  | 5.733388141 |
| 6.584221886 | 6.70105905  | 4.96202997  |
| 6.252710945 | 6.016770012 | 6.329207717 |
| 4.997091753 | 4.855747397 | 5.298093254 |
| 5.364923368 | 6.125204806 | 5.711085288 |
| 5.483854708 | 4.602852522 | 5.353858713 |
| 7.068060197 | 6.216378227 | 7.77256715  |
| 5.979963225 | 4.99873169  | 6.097511677 |
| 5.43254854  | 4.636360687 | 4.99288288  |
| 5.397836874 | 5.298156067 | 5.450410593 |
| 5.498216664 | 4.685155134 | 5.172831605 |
| 5.40162823  | 5.334241081 | 6.078916878 |
| 4.904321535 | 4.647391796 | 6.135706219 |
| 5.003587578 | 5.661492967 | 5.807508398 |
| 4.701423286 | 4.916129769 | 5.341486906 |
| 5.555341893 | 5.240148768 | 5.66478995  |
| 5.512501481 | 5.365412986 | 5.647376451 |
| 5.812210274 | 5.938563165 | 6.323727841 |
| 6.090169645 | 6.52474027  | 5.841816598 |
| 6.149950021 | 4.627528994 | 5.005941915 |
| 5.716313247 | 5.150585626 | 5.442297169 |
| 5.170041719 | 5.602506283 | 5.262940549 |
| 5.425041328 | 5.287391089 | 5.792575732 |
| 4.813422867 | 5.759795155 | 6.476348153 |
| 6.461142209 | 5.410588635 | 5.364297518 |
| 5.054943157 | 5.301876952 | 4.777796286 |
| 4.921491108 | 4.631761307 | 5.700597954 |
| 5.282908731 | 5.316940749 | 4.907896466 |
| 5.58381588  | 4.617660068 | 5.68827376  |
| 4.629518812 | 4.837089212 | 5.974140089 |
| 5.81680287  | 5.371609621 | 5.392680155 |
| 5.210953962 | 4.866526134 | 4.768347397 |
| 4.86326525  | 5.334325451 | 4.696792729 |
| 5.219761987 | 5.622613192 | 4.630531086 |
| 5.838068402 | 5.759844495 | 6.386062814 |
| 6.126486005 | 4.655747247 | 6.06724788  |
| 6.904263777 | 5.840028411 | 6.066469861 |
| 5.72486186  | 5.920240064 | 4.854206422 |
| 5.377902297 | 4.647348807 | 5.385016895 |
| 4.975823329 | 4.655224441 | 5.041261339 |
| 5.680984497 | 5.149052236 | 5.069784046 |
| 5.254207745 | 4.755888927 | 5.782913473 |
| 6.046204688 | 5.9644949   | 5.674814291 |

|             |             |             |
|-------------|-------------|-------------|
| 5.446361995 | 5.573072344 | 5.475772152 |
| 6.410276571 | 6.017561809 | 5.446301471 |
| 5.093811326 | 5.113299774 | 4.875783347 |
| 5.456391342 | 5.267869133 | 4.77123467  |
| 5.166307176 | 4.700050262 | 5.059267298 |
| 5.671957957 | 4.602261635 | 5.37011458  |
| 4.88733975  | 4.745783485 | 5.465270379 |
| 4.615094513 | 5.423690664 | 5.462150648 |
| 6.276391993 | 5.606747864 | 5.871405057 |
| 5.598277329 | 4.680904317 | 5.500163235 |
| 5.040630343 | 6.466297555 | 4.74140752  |
| 5.596718732 | 4.9082361   | 5.928152301 |
| 5.808940767 | 4.720461598 | 6.034407974 |
| 5.10999153  | 4.740154796 | 5.782369403 |
| 5.737723795 | 5.086482186 | 5.88637995  |
| 5.657579903 | 5.53582514  | 4.863750738 |
| 5.647771025 | 5.396072991 | 4.626057981 |
| 4.972528004 | 5.696763331 | 4.867319959 |
| 5.845533427 | 4.669346885 | 5.488214186 |
| 5.192481554 | 5.055146874 | 5.307443551 |
| 5.16972555  | 4.929272095 | 5.199579878 |
| 6.167576997 | 5.614471486 | 5.656037491 |
| 5.198748891 | 4.732418566 | 5.241391613 |
| 5.384256135 | 5.365952273 | 4.744167808 |
| 6.152494254 | 5.595318771 | 5.891077671 |
| 6.114780749 | 5.80310728  | 6.854119594 |
| 4.702329681 | 4.663112039 | 5.800709562 |
| 5.341902016 | 5.113081436 | 5.222342538 |
| 5.944150371 | 5.378670865 | 4.851302863 |
| 5.834534398 | 4.804555734 | 5.784584212 |
| 5.307047633 | 5.514146458 | 5.142305399 |
| 6.425784366 | 5.541909212 | 5.198541311 |
| 5.788966445 | 5.070872897 | 6.173511811 |
| 5.550173484 | 4.633751253 | 6.513856104 |
| 5.913220476 | 5.78166887  | 5.505860449 |
| 5.800457491 | 4.763773331 | 6.359394139 |
| 6.68551746  | 6.72674791  | 6.2020609   |
| 5.540880066 | 5.689825109 | 5.283344836 |
| 5.024915322 | 4.673974156 | 5.565856244 |
| 4.985131448 | 5.279654967 | 5.104586115 |
| 5.178343999 | 4.61649496  | 5.624136654 |
| 5.010495106 | 5.480223727 | 5.018897358 |
| 5.587869441 | 5.040101913 | 5.863679429 |
| 5.030515888 | 5.447880863 | 5.676822136 |
| 4.992419828 | 4.879520011 | 5.375610848 |
| 5.637501406 | 4.676248089 | 4.903265612 |

|             |             |             |
|-------------|-------------|-------------|
| 6.102645842 | 7.008191152 | 7.081116966 |
| 5.689420601 | 6.643881093 | 5.798097407 |
| 5.930925391 | 4.829282069 | 4.851989516 |
| 5.989494853 | 4.648363005 | 5.310830979 |
| 5.328441642 | 5.557140194 | 5.741441591 |
| 6.897588432 | 4.642085617 | 6.608405838 |
| 5.984588825 | 5.079782553 | 4.645915311 |
| 5.515382349 | 5.358304511 | 6.016288979 |
| 4.699277097 | 5.365813332 | 4.675483198 |
| 5.175149043 | 4.674787286 | 5.261610583 |
| 5.407652762 | 5.536915638 | 5.497318679 |
| 5.907144886 | 5.055268263 | 4.667506476 |
| 5.437316193 | 5.011361804 | 5.000487109 |
| 6.326204621 | 5.059950615 | 5.829031124 |
| 7.296747241 | 5.904313389 | 4.863420151 |
| 5.774933307 | 4.753203955 | 5.890352953 |
| 6.2978272   | 5.379480212 | 5.550914177 |
| 5.250749883 | 4.765662455 | 5.416327982 |
| 5.589357266 | 4.821726431 | 5.20796098  |
| 5.970135696 | 4.598386303 | 5.693336204 |
| 5.857118383 | 4.786832797 | 5.475079317 |
| 5.261457255 | 4.693751979 | 5.078392645 |
| 4.670606933 | 4.682564133 | 8.348845508 |
| 5.301168427 | 4.797577022 | 5.254303023 |
| 4.602171566 | 5.006726639 | 4.662054223 |
| 5.954521217 | 5.726440153 | 4.801603612 |
| 6.269115673 | 4.89856631  | 5.153743207 |
| 6.895519199 | 8.087356327 | 5.953970475 |
| 5.734295404 | 5.828167757 | 5.509354642 |
| 4.790430211 | 4.702858516 | 5.517460547 |
| 5.356160441 | 5.458658186 | 5.044875358 |
| 5.11841563  | 4.598776412 | 5.245604623 |
| 4.660105406 | 4.655782109 | 5.907200884 |
| 5.286008688 | 5.395726694 | 4.669204356 |
| 4.846833186 | 4.715597601 | 4.876189651 |
| 6.542687906 | 4.655896211 | 6.49963581  |
| 4.593573151 | 5.199415247 | 5.051397822 |
| 4.726947285 | 4.931159984 | 5.410283965 |
| 5.085791513 | 4.968830292 | 4.772278579 |
| 6.155907878 | 5.687562221 | 6.026148781 |
| 4.908170804 | 4.669639176 | 5.87606278  |
| 5.028535795 | 5.042705782 | 4.758321245 |
| 5.516285823 | 4.619011322 | 5.752968597 |
| 7.11681412  | 6.273008679 | 5.74861391  |
| 5.296492963 | 5.758870678 | 5.729766814 |
| 4.890240368 | 5.762504667 | 4.961178093 |



|             |             |             |
|-------------|-------------|-------------|
| 5.024932233 | 5.426132523 | 5.203869445 |
| 4.85814776  | 5.542966141 | 5.009199335 |
| 5.517822517 | 5.192408946 | 5.535643351 |
| 4.694264082 | 4.749251128 | 5.754333122 |
| 6.48531744  | 4.942576343 | 4.894080349 |
| 5.350166613 | 4.599408593 | 5.361643521 |
| 4.910944293 | 5.677470439 | 4.945826224 |
| 5.261389786 | 5.649158672 | 5.63577688  |
| 5.592863255 | 4.698670476 | 4.831364043 |
| 4.78538811  | 6.751764768 | 5.817128437 |
| 6.073937521 | 6.17319585  | 5.982641016 |
| 4.57422995  | 7.108745777 | 5.408900675 |
| 4.814515397 | 4.871822241 | 4.809558521 |
| 4.86768545  | 6.712125149 | 6.545920619 |
| 6.611152228 | 6.698671404 | 6.933578664 |
| 4.76261712  | 4.902391052 | 4.99109496  |
| 5.252150757 | 5.09404348  | 5.271613927 |
| 5.396154516 | 5.066596418 | 4.990998096 |
| 6.716265196 | 6.519769748 | 6.356862496 |
| 4.854123876 | 4.940513221 | 4.763289023 |
| 7.37852973  | 4.721635075 | 6.100222074 |
| 5.474776487 | 4.647692128 | 5.133621556 |
| 5.039825319 | 4.619824401 | 5.146916921 |
| 5.282333876 | 5.631255962 | 4.670415409 |
| 6.397978427 | 6.380593645 | 5.860379511 |
| 5.943182464 | 4.685626133 | 5.237096184 |
| 5.407599082 | 4.690116091 | 4.645144586 |
| 5.427772108 | 4.769134855 | 4.954892735 |
| 5.0628314   | 4.9381363   | 5.102217277 |
| 5.137715281 | 4.850900182 | 5.125081994 |
| 5.120286583 | 5.987356186 | 4.809359946 |
| 5.888738048 | 5.494733356 | 4.751005053 |
| 5.446719498 | 5.061611093 | 5.643262698 |
| 5.045776727 | 5.367714778 | 5.666481911 |
| 4.580894224 | 5.217992946 | 4.984768969 |
| 6.278066822 | 5.639152793 | 4.690330105 |
| 4.77023713  | 4.785846906 | 5.131125347 |
| 4.827855571 | 4.705656139 | 5.426451363 |
| 5.627164665 | 4.631038161 | 5.628338023 |
| 4.546823249 | 4.659945108 | 5.169570975 |
| 5.815372445 | 4.738286466 | 5.431959839 |
| 6.364445837 | 4.619515995 | 5.82868823  |
| 5.605731179 | 5.664996807 | 4.806484904 |
| 4.960016633 | 4.818721351 | 5.737295274 |
| 5.858096352 | 4.619837671 | 5.377200982 |
| 5.229319317 | 5.157951531 | 4.633977123 |

|             |             |             |
|-------------|-------------|-------------|
| 6.248893487 | 4.852440475 | 5.70395032  |
| 5.543688015 | 5.165483618 | 5.700325834 |
| 5.335421651 | 5.380195261 | 6.069531473 |
| 5.418771443 | 5.678146289 | 4.619057558 |
| 6.094613518 | 4.806028592 | 5.485943937 |
| 5.506738028 | 4.585624072 | 6.506596473 |
| 4.754875662 | 5.597676481 | 5.602018079 |
| 5.780229555 | 5.012823552 | 4.883447822 |
| 7.446935759 | 7.872111694 | 5.404272346 |
| 4.673217459 | 5.267921341 | 4.914999011 |
| 5.377454397 | 4.842173328 | 4.947092377 |
| 6.152033999 | 5.254172021 | 4.914032151 |
| 4.832584403 | 5.054444102 | 5.868655573 |
| 4.992917258 | 4.88633882  | 5.093788502 |
| 5.414925679 | 4.865882063 | 5.630296902 |
| 4.911868386 | 4.558703093 | 5.246982727 |
| 6.131856609 | 6.532702754 | 5.367094653 |
| 5.170132958 | 4.706780276 | 4.765776548 |
| 4.90187694  | 4.857156422 | 5.864236758 |
| 6.441351817 | 5.457528245 | 5.209820737 |
| 5.433979354 | 5.226510989 | 5.279607055 |
| 6.275245437 | 4.592301538 | 6.124706393 |
| 5.349303919 | 4.856468966 | 5.463343502 |
| 5.392840062 | 4.573985694 | 5.876502751 |
| 7.806051131 | 6.70386837  | 5.509540216 |
| 6.038833881 | 6.107773423 | 6.757197636 |
| 6.17646441  | 4.597229845 | 5.069152994 |
| 5.517476537 | 4.629896521 | 4.705283576 |
| 5.213811062 | 5.390719197 | 5.281680248 |
| 5.759054793 | 5.062392883 | 5.612022565 |
| 5.457318246 | 4.632775688 | 5.425002998 |
| 4.628724254 | 4.761992159 | 4.823038132 |
| 4.853865942 | 6.53973821  | 5.51255594  |
| 5.497985029 | 5.004380504 | 5.592912314 |
| 4.811631704 | 5.806852306 | 5.615840679 |
| 5.96159779  | 5.230408477 | 4.688274701 |
| 7.062277281 | 7.169602779 | 6.686576055 |
| 5.587527645 | 5.40525798  | 5.883309505 |
| 6.297347874 | 5.922155313 | 6.517895852 |
| 4.643868753 | 5.224273561 | 5.053394227 |
| 5.394237958 | 5.558186303 | 5.676616617 |
| 5.37731243  | 4.95547652  | 6.446734072 |
| 6.313754682 | 5.401601523 | 5.771104547 |
| 5.064768143 | 5.095563322 | 4.800964132 |
| 5.618938998 | 6.529884756 | 5.630773941 |
| 5.145975856 | 4.730768897 | 5.56349652  |

|             |             |             |
|-------------|-------------|-------------|
| 4.81043144  | 5.047342022 | 5.462570385 |
| 5.061306765 | 4.71451285  | 4.645926186 |
| 5.444723899 | 4.700054606 | 5.068464934 |
| 4.634172799 | 4.927763669 | 6.086644457 |
| 4.98729909  | 5.518829981 | 4.934343131 |
| 5.660208247 | 4.53461053  | 4.873149444 |
| 5.783442149 | 5.054196823 | 4.733193659 |
| 6.145457683 | 5.244148297 | 5.695158813 |
| 6.29313297  | 4.552927127 | 5.312838924 |
| 5.011320817 | 5.221615028 | 5.15968935  |
| 5.744773916 | 4.521630397 | 5.736951922 |
| 6.474399796 | 6.343831796 | 6.230663494 |
| 4.997704    | 4.607147206 | 5.317099654 |
| 5.869533775 | 5.109588977 | 6.311541205 |
| 5.588551398 | 4.723042128 | 5.291155872 |
| 5.215691643 | 4.608389893 | 5.167613438 |
| 4.543464808 | 5.558571351 | 5.50185025  |
| 6.340615325 | 4.553116587 | 4.980955169 |
| 10.54515566 | 5.371345941 | 4.80091521  |
| 6.209240109 | 6.154821262 | 5.408301381 |
| 4.90229032  | 4.894286555 | 4.605515902 |
| 5.663118597 | 5.133766775 | 4.538598596 |
| 5.529416486 | 4.489482967 | 5.899068664 |
| 5.176565637 | 5.171133551 | 5.268119317 |
| 5.792728666 | 4.87877942  | 5.382703769 |
| 5.197082705 | 4.552172309 | 5.193246143 |
| 6.286681893 | 6.421394548 | 6.468095536 |
| 5.496451004 | 4.687381725 | 5.202782408 |
| 6.156800719 | 5.757077209 | 5.356768758 |
| 5.3155686   | 5.076999026 | 4.542087419 |
| 4.49164395  | 5.321708618 | 4.85153585  |
| 6.024202262 | 5.480606727 | 5.695042749 |
| 5.878693284 | 5.15662948  | 5.580792701 |
| 5.347940449 | 5.184927988 | 5.603566087 |
| 5.038842673 | 5.628849457 | 5.313826643 |
| 5.179282502 | 4.55177836  | 4.96189483  |
| 6.680069025 | 4.558131472 | 5.629780358 |
| 6.301404717 | 5.026524373 | 5.71525049  |
| 5.145023565 | 6.250537783 | 5.033385146 |
| 4.640859333 | 4.96571636  | 4.983219675 |
| 5.440693986 | 4.806810266 | 4.697289125 |
| 5.417146495 | 4.681673014 | 5.557781423 |
| 6.232631477 | 5.335556647 | 5.714999077 |
| 5.393400708 | 6.066326219 | 6.947577206 |
| 5.414309761 | 4.932348152 | 5.30952728  |
| 6.470181669 | 4.550829379 | 4.696888807 |

|             |             |             |
|-------------|-------------|-------------|
| 5.75015611  | 5.017685892 | 5.685156976 |
| 6.017112273 | 4.665726832 | 6.812982805 |
| 6.132919233 | 5.408002717 | 5.264412675 |
| 6.516909171 | 5.718459677 | 6.453293666 |
| 4.972586042 | 5.208664968 | 5.003101808 |
| 4.543843583 | 4.57661901  | 5.221791381 |
| 4.495355263 | 4.806774657 | 5.910536341 |
| 6.811705386 | 5.822512476 | 6.401085296 |
| 5.983680345 | 5.730224817 | 5.886565674 |
| 4.937256822 | 4.744853634 | 4.852361943 |
| 5.466878829 | 5.888506182 | 5.7527759   |
| 5.226869778 | 4.68669902  | 5.10879743  |
| 5.185937533 | 4.532991627 | 4.671668141 |
| 6.204192108 | 5.67547106  | 5.052228655 |
| 4.589797603 | 6.109506588 | 5.353773974 |
| 5.905822173 | 5.440016752 | 5.401193371 |
| 5.234206851 | 4.535211657 | 4.846703203 |
| 5.229118467 | 4.524653236 | 6.910229126 |
| 5.551495358 | 6.317252849 | 4.903119415 |
| 5.368353357 | 4.891914217 | 5.089553545 |
| 4.81080245  | 4.593587509 | 5.17764271  |
| 4.568581771 | 4.659442536 | 4.719299732 |
| 4.94064864  | 4.601632323 | 4.783204716 |
| 5.314058435 | 4.795472699 | 4.528904927 |
| 4.806262206 | 5.12841227  | 5.293705008 |
| 6.241624779 | 5.588509481 | 4.704368352 |
| 4.673278118 | 5.506722884 | 5.831914306 |
| 5.650709538 | 4.777292739 | 4.571359906 |
| 4.72926738  | 5.640885972 | 5.826884478 |
| 5.503657059 | 6.655217758 | 6.090545454 |
| 5.402140615 | 4.510149989 | 4.912368458 |
| 6.379643206 | 4.808838581 | 4.582818705 |
| 4.833609013 | 5.241337381 | 5.076916153 |
| 7.799968653 | 4.69868659  | 4.503829282 |
| 5.316613665 | 5.606531277 | 4.476309485 |
| 6.125988066 | 5.540198267 | 5.642635669 |
| 5.705630605 | 5.316695798 | 5.725892789 |
| 5.11737973  | 4.721174399 | 4.70918435  |
| 6.192433418 | 5.66908464  | 4.810007572 |
| 5.963898348 | 4.705064953 | 5.94530952  |
| 4.536875771 | 4.596270124 | 4.598760256 |
| 6.687345908 | 5.807258247 | 5.807789597 |
| 4.732899586 | 4.595844494 | 5.548597785 |
| 4.78953316  | 5.582252201 | 5.198902254 |
| 5.710564116 | 4.532026917 | 5.084275549 |
| 4.509890754 | 5.051117617 | 5.594472133 |

|             |             |             |
|-------------|-------------|-------------|
| 5.071008331 | 4.90597842  | 5.526423102 |
| 5.367799709 | 5.653176322 | 5.241847007 |
| 5.629436371 | 5.893411321 | 6.997866382 |
| 5.419361922 | 4.51744552  | 6.661379507 |
| 6.042750254 | 4.529691512 | 5.738512698 |
| 5.577567423 | 5.071876657 | 6.065892925 |
| 5.426483591 | 4.611791529 | 5.256229264 |
| 5.22311295  | 4.521218594 | 6.049191159 |
| 4.563085859 | 4.475764695 | 4.661072604 |
| 5.649360891 | 4.517433493 | 5.063643624 |
| 4.808984575 | 5.079901254 | 4.526305263 |
| 4.859217662 | 4.64445231  | 5.234628994 |
| 5.426661226 | 5.072553448 | 5.785026745 |
| 5.170558886 | 4.922527167 | 4.456289498 |
| 4.888587603 | 5.049229813 | 5.702155502 |
| 5.647819175 | 4.750362945 | 5.057290436 |
| 6.040403026 | 4.550282054 | 5.989852031 |
| 4.523264928 | 4.949208315 | 5.065769322 |
| 5.792251083 | 4.775482413 | 5.211827148 |
| 6.615793095 | 4.548856241 | 5.511555916 |
| 4.667706085 | 4.934639508 | 5.32264678  |
| 4.594850888 | 4.89221155  | 5.624963409 |
| 6.824189003 | 5.769395828 | 5.795847625 |
| 5.766217721 | 5.503048421 | 6.253988203 |
| 6.22339095  | 5.894901445 | 5.355471895 |
| 4.538378711 | 5.305488056 | 4.988406484 |
| 8.867907667 | 8.01664084  | 6.593534463 |
| 4.562663766 | 6.352514148 | 6.233033356 |
| 4.757306469 | 4.926317001 | 5.128528299 |
| 6.095639629 | 4.604781518 | 5.264669979 |
| 5.371882493 | 4.693475396 | 4.552833898 |
| 4.860214001 | 5.425962972 | 5.315350352 |
| 4.557917936 | 5.379491651 | 5.663225193 |
| 4.500398198 | 5.789363993 | 5.270104561 |
| 4.77372969  | 4.784153866 | 5.072750176 |
| 6.374209216 | 5.949921779 | 6.213954898 |
| 4.720562327 | 4.861515456 | 6.253033378 |
| 4.534068139 | 5.108091784 | 4.742681363 |
| 4.602144052 | 4.723365539 | 5.271835399 |
| 5.537864266 | 4.651952793 | 5.76863894  |
| 5.875282296 | 4.945274783 | 4.517767984 |
| 5.001602175 | 4.892473124 | 5.11471788  |
| 5.005547532 | 5.052327301 | 5.503699671 |
| 4.501657909 | 4.869495454 | 4.762209114 |
| 5.390901514 | 4.565708326 | 5.403719797 |
| 4.888318541 | 4.995044238 | 4.531820395 |

|             |             |             |
|-------------|-------------|-------------|
| 5.316355684 | 4.583187055 | 6.065324032 |
| 6.934879034 | 5.954188169 | 4.778876566 |
| 5.718345478 | 5.295267689 | 4.615993796 |
| 5.645811099 | 6.394187705 | 5.357565202 |
| 5.222452592 | 5.519727417 | 4.616922588 |
| 5.521935181 | 4.677006344 | 5.199017039 |
| 5.058444938 | 4.503624098 | 4.62786526  |
| 4.977786464 | 4.621565906 | 5.066264414 |
| 6.469296501 | 4.575907404 | 4.923972842 |
| 5.925762052 | 5.755135723 | 5.89338314  |
| 5.5206607   | 4.656999001 | 4.587053341 |
| 4.798570225 | 4.869821736 | 4.789725324 |
| 4.68261846  | 5.383547536 | 4.806579302 |
| 5.509136346 | 6.523428466 | 5.562206458 |
| 5.787782802 | 4.707262975 | 4.697202151 |
| 5.204347114 | 5.2118134   | 5.664573084 |
| 5.850750904 | 5.212760573 | 4.616727019 |
| 4.469338889 | 4.735924751 | 5.246807608 |
| 4.743350145 | 4.508147304 | 5.223576089 |
| 4.840009179 | 5.197931914 | 4.843982672 |
| 4.709971707 | 4.962670648 | 4.497818148 |
| 5.608794782 | 5.225087007 | 5.050769471 |
| 7.496114591 | 6.763426041 | 4.81546479  |
| 4.768422504 | 4.674396421 | 4.628262406 |
| 5.669756129 | 5.488001227 | 4.954054139 |
| 6.100573906 | 4.622922146 | 4.488833532 |
| 4.595785834 | 4.828244779 | 5.496719717 |
| 6.57484378  | 5.024156861 | 5.743032094 |
| 6.316491526 | 4.94876605  | 4.799792855 |
| 6.092294676 | 5.025365519 | 4.867518256 |
| 5.434994261 | 5.115176053 | 4.472417372 |
| 5.918653661 | 4.579582695 | 7.04800304  |
| 5.661115069 | 5.107193778 | 5.283320119 |
| 5.128280383 | 5.186267729 | 5.782442905 |
| 4.959663686 | 4.710476785 | 4.807511184 |
| 4.812213399 | 4.869580737 | 4.631891081 |
| 6.165506235 | 5.570229334 | 4.496430109 |
| 4.888853368 | 4.53449512  | 5.311066644 |
| 4.910909191 | 4.809909592 | 5.262099403 |
| 4.482639939 | 4.589719074 | 5.113756923 |
| 4.611468157 | 4.964437977 | 5.073375152 |
| 6.534609718 | 5.969494876 | 4.827468964 |
| 4.616441104 | 5.090331782 | 5.715125883 |
| 5.443240786 | 5.062894418 | 5.975272272 |
| 5.170621904 | 4.496431678 | 5.90087402  |
| 6.736508006 | 5.790799717 | 5.231199597 |

|             |             |             |
|-------------|-------------|-------------|
| 5.476229889 | 6.643105484 | 6.409223974 |
| 5.359736647 | 5.040288384 | 4.805643264 |
| 6.097595274 | 4.473001347 | 4.786214159 |
| 4.864217579 | 4.924571889 | 5.331048857 |
| 5.05562427  | 4.804983211 | 4.578513208 |
| 4.65616519  | 5.389422928 | 5.350132648 |
| 6.532187013 | 4.751727428 | 5.064221421 |
| 5.015091929 | 4.765477293 | 4.550586932 |
| 6.405433357 | 4.499867222 | 5.337048216 |
| 5.364914828 | 4.67189294  | 4.674952269 |
| 5.639445973 | 4.547649704 | 5.317909569 |
| 6.133818393 | 4.986493989 | 5.928484773 |
| 5.541938396 | 4.693042513 | 5.134491883 |
| 5.173817282 | 4.472240294 | 5.412392766 |
| 5.068887107 | 6.246961968 | 6.366205588 |
| 6.600151211 | 6.274694673 | 6.787230038 |
| 5.620062774 | 5.72502824  | 5.22369744  |
| 5.705225514 | 4.432752047 | 4.591244917 |
| 5.223309633 | 5.020744095 | 4.517781412 |
| 5.983246972 | 5.191687791 | 5.173626601 |
| 4.871061482 | 4.862640663 | 5.297156853 |
| 5.295419587 | 4.651832539 | 4.935343997 |
| 4.574559647 | 5.284921677 | 5.504038217 |
| 5.768843693 | 5.124808816 | 5.391386584 |
| 6.104253042 | 4.482175894 | 5.161277346 |
| 5.315711278 | 6.46896773  | 5.576576017 |
| 7.066672967 | 7.549888531 | 6.284018894 |
| 5.524121847 | 5.57978179  | 4.634210681 |
| 6.013038708 | 6.350582284 | 4.859062395 |
| 4.698442438 | 4.43261983  | 5.400441356 |
| 5.42069203  | 4.998679858 | 5.205484843 |
| 6.23359892  | 4.685118411 | 4.940458592 |
| 6.688571786 | 4.648388217 | 5.822781571 |
| 4.472518726 | 4.949114727 | 5.231466292 |
| 4.699899004 | 4.646104089 | 4.859606823 |
| 5.620577516 | 5.739878303 | 6.537688678 |
| 5.28571214  | 5.146421292 | 5.065045211 |
| 5.642678499 | 4.536348919 | 5.758873682 |
| 5.400940167 | 5.452910261 | 4.912196239 |
| 5.449343403 | 5.017839876 | 5.410917181 |
| 5.82560944  | 4.449865018 | 6.056140056 |
| 8.757854081 | 7.739358263 | 6.998746939 |
| 5.700824243 | 4.563779902 | 4.593619698 |
| 5.555550372 | 5.487445823 | 5.650129372 |
| 6.341170239 | 5.247601796 | 5.758675762 |
| 6.899018683 | 5.679924064 | 6.58751017  |

|             |             |             |
|-------------|-------------|-------------|
| 5.728995483 | 5.492007362 | 4.580562023 |
| 5.777072595 | 5.57701059  | 5.056255621 |
| 5.253589181 | 4.619278201 | 4.764450471 |
| 4.86763089  | 4.795087154 | 5.319513808 |
| 4.638098213 | 4.8847912   | 4.607351407 |
| 4.678234272 | 4.778365897 | 4.736008419 |
| 5.447358973 | 5.751440284 | 4.919915364 |
| 4.733097177 | 5.276814201 | 6.821605888 |
| 5.957445403 | 4.498882609 | 4.455164439 |
| 4.90738759  | 5.020668014 | 4.824878171 |
| 4.92389031  | 5.416299048 | 6.057745442 |
| 4.792208201 | 4.873242804 | 4.881455428 |
| 5.237576643 | 5.021225566 | 5.95452733  |
| 5.494740826 | 5.419671228 | 5.179567085 |
| 4.482378742 | 4.810453558 | 4.515490459 |
| 5.04117893  | 4.76094119  | 4.743786695 |
| 5.645402926 | 4.480881156 | 5.987814171 |
| 5.574961421 | 4.448285277 | 5.251594596 |
| 4.48804399  | 4.996846628 | 5.055200985 |
| 5.751381022 | 4.927976165 | 5.359358736 |
| 5.689668269 | 4.836588827 | 5.79213972  |
| 4.945874726 | 4.490443652 | 4.542565967 |
| 5.483437961 | 4.450941321 | 4.571446902 |
| 5.225298552 | 4.651501588 | 5.509161464 |
| 4.502121812 | 5.210102838 | 4.673738981 |
| 5.674737258 | 4.401104546 | 4.871757212 |
| 7.121716875 | 4.427948111 | 5.782810127 |
| 5.278660301 | 5.725560441 | 5.377645106 |
| 5.751836564 | 5.441819926 | 4.626133223 |
| 4.615199868 | 5.082628934 | 5.272441007 |
| 6.193571987 | 5.458497696 | 5.86401768  |
| 5.575481529 | 4.795171393 | 4.412029128 |
| 6.232265685 | 5.834157035 | 7.181703463 |
| 5.478937945 | 4.534510955 | 4.788657599 |
| 5.436434674 | 4.594800385 | 5.267624214 |
| 5.374018936 | 5.036717026 | 5.49765916  |
| 4.845311323 | 4.917275064 | 5.070917915 |
| 5.111054109 | 4.670100217 | 5.092917004 |
| 6.107628468 | 4.964195933 | 5.388143641 |
| 5.114627054 | 4.419342513 | 6.002584183 |
| 4.996969343 | 4.519129669 | 5.514196894 |
| 4.97957261  | 4.62384551  | 5.417127756 |
| 5.834622018 | 4.990541378 | 4.496817095 |
| 5.198942222 | 4.573457944 | 5.437534073 |
| 4.743752174 | 6.384358801 | 5.804707315 |
| 5.160528108 | 4.541571759 | 5.345207238 |



|             |             |             |
|-------------|-------------|-------------|
| 4.444630602 | 4.791488165 | 4.953500258 |
| 5.660334966 | 4.515368024 | 5.555898459 |
| 5.645467089 | 5.254245423 | 4.544818721 |
| 5.149741055 | 4.483322915 | 4.501042172 |
| 4.638966444 | 4.815539405 | 4.574259828 |
| 4.417437396 | 5.653304481 | 6.557641576 |
| 4.423483369 | 4.994218991 | 4.966020211 |
| 6.223407354 | 4.651206755 | 5.657144349 |
| 5.811299284 | 5.398253051 | 6.009409827 |
| 4.385044105 | 5.512762839 | 5.491617651 |
| 5.471157735 | 5.189311252 | 4.821638713 |
| 4.880051258 | 4.535654002 | 4.881556662 |
| 5.036664186 | 4.418731611 | 4.657243077 |
| 5.120197296 | 4.492300079 | 4.457585348 |
| 4.625960692 | 4.484840354 | 5.54435886  |
| 4.525397029 | 4.739151125 | 4.912380821 |
| 4.48818018  | 6.896446404 | 6.198738666 |
| 5.199395658 | 4.759100836 | 5.185258365 |
| 5.261456269 | 4.876015709 | 5.428746773 |
| 6.291377235 | 4.918791111 | 4.69969379  |
| 5.824849076 | 5.855444571 | 4.924720495 |
| 4.808734159 | 6.60211875  | 6.553654923 |
| 5.568577766 | 4.415223506 | 4.89101654  |
| 6.898548369 | 5.34995643  | 5.84294485  |
| 5.510949116 | 5.594881735 | 4.455129602 |
| 5.287336784 | 4.434149005 | 5.443890884 |
| 6.076773352 | 5.119514466 | 5.775221726 |
| 5.777769261 | 5.916719448 | 5.270030695 |
| 5.219799966 | 5.773597813 | 4.834953247 |
| 5.6690291   | 5.689379197 | 5.041496375 |
| 4.43481656  | 5.260187854 | 6.393016906 |
| 5.288214071 | 5.361565731 | 5.123134301 |
| 5.053760401 | 5.414856541 | 4.772841648 |
| 5.458569649 | 5.12755368  | 5.023455827 |
| 4.860253261 | 4.7822494   | 5.456355537 |
| 4.748140923 | 4.686914515 | 6.341554334 |
| 5.1115026   | 4.452479749 | 4.859363035 |
| 5.026023944 | 4.915140411 | 4.998634371 |
| 5.211056975 | 5.696902756 | 5.522570188 |
| 5.785972896 | 5.645194803 | 4.506715986 |
| 4.820961761 | 4.836498454 | 5.33264961  |
| 5.80900229  | 5.619829206 | 5.00294436  |
| 5.28547489  | 5.368031425 | 4.576037109 |
| 4.66649861  | 4.381100437 | 4.575549092 |
| 5.237101824 | 5.033198305 | 5.282863513 |
| 5.738364128 | 4.423425376 | 4.946218235 |

|             |             |             |
|-------------|-------------|-------------|
| 5.463397419 | 5.810458134 | 6.39195407  |
| 5.498112041 | 5.595754433 | 5.013302374 |
| 4.448510619 | 4.726039312 | 5.353957116 |
| 5.842974742 | 4.561834383 | 5.593110911 |
| 4.545377369 | 4.438298322 | 5.12114688  |
| 5.427628384 | 5.537696947 | 5.882674717 |
| 5.256767877 | 5.597753679 | 5.969719043 |
| 5.792973174 | 4.988903211 | 4.990907911 |
| 5.277754729 | 4.673700867 | 4.489756044 |
| 5.000249435 | 4.982417178 | 5.406027722 |
| 4.788246544 | 4.856758093 | 5.73443462  |
| 6.910885628 | 4.892961782 | 6.010864126 |
| 4.970077748 | 5.394096245 | 5.721942702 |
| 5.914460287 | 5.379056246 | 5.276802799 |
| 5.047713938 | 5.686777815 | 4.724217313 |
| 4.414285654 | 5.744633301 | 5.427481705 |
| 4.455266305 | 5.680513531 | 5.323353329 |
| 5.5040961   | 5.350671443 | 4.664088526 |
| 5.434511422 | 5.188357323 | 4.443807662 |
| 5.27802083  | 5.099939301 | 5.507578532 |
| 6.072870951 | 5.698239229 | 5.839316516 |
| 4.416374013 | 5.1289829   | 5.460990639 |
| 5.20334901  | 5.770206246 | 5.919620857 |
| 7.065134075 | 4.54664538  | 6.180124218 |
| 4.574993724 | 4.549495311 | 4.535479682 |
| 5.06186585  | 5.383349397 | 4.85707238  |
| 5.431644994 | 4.961708323 | 4.843195256 |
| 6.441212759 | 4.666809891 | 5.431341923 |
| 5.669806314 | 5.042073584 | 4.906306382 |
| 4.518976013 | 7.13756634  | 4.517040122 |
| 5.569288725 | 5.528301209 | 4.918376952 |
| 5.824634117 | 5.874637956 | 4.766675365 |
| 5.595173779 | 5.811508361 | 6.294393898 |
| 6.317937038 | 5.524954321 | 4.888237602 |
| 5.32806228  | 4.933932356 | 4.955058358 |
| 5.131098432 | 5.696877054 | 4.433382187 |
| 4.759267237 | 4.797329223 | 4.472057325 |
| 6.540320283 | 4.389801533 | 6.306996957 |
| 5.75126343  | 5.022826837 | 4.917518818 |
| 4.825582038 | 4.448456201 | 4.632716287 |
| 6.510726986 | 6.31323292  | 5.620765277 |
| 5.04077883  | 4.752948713 | 5.330718829 |
| 4.997625182 | 5.069484411 | 4.823667823 |
| 5.498179799 | 4.354752833 | 4.814570119 |
| 4.859466037 | 4.393358975 | 5.085101776 |
| 5.337049905 | 4.829190403 | 4.427935266 |

|             |             |             |
|-------------|-------------|-------------|
| 5.543446589 | 5.244619252 | 5.208825883 |
| 4.438793462 | 5.414352446 | 5.869239369 |
| 4.815323383 | 4.449886157 | 5.15485698  |
| 4.499045255 | 6.059550843 | 6.042613908 |
| 4.413699364 | 5.335721144 | 5.489633016 |
| 5.545638421 | 5.700830841 | 5.189043032 |
| 6.520350862 | 5.097388615 | 5.395664724 |
| 4.375284687 | 5.157073851 | 4.831060899 |
| 5.626977828 | 5.672882802 | 5.284920264 |
| 4.421648084 | 5.353660119 | 5.936393516 |
| 5.640384275 | 4.474634239 | 4.914695713 |
| 6.3031531   | 4.373187639 | 5.275553075 |
| 4.410910331 | 5.392715618 | 5.45145737  |
| 5.118423193 | 4.363394548 | 5.172468693 |
| 6.621000699 | 6.122557015 | 6.498526548 |
| 4.398097245 | 4.711197734 | 5.819705454 |
| 4.438909093 | 5.641772603 | 5.037505877 |
| 5.299249307 | 4.906048787 | 4.908095826 |
| 6.090096596 | 6.334165415 | 5.811215084 |
| 4.593874949 | 4.416480423 | 4.774389812 |
| 6.492639538 | 6.026970585 | 6.022445829 |
| 5.517026273 | 4.666385201 | 4.956516508 |
| 4.768722906 | 4.695288274 | 4.767819604 |
| 6.740700242 | 5.571871962 | 5.000252332 |
| 5.468915363 | 5.034518735 | 4.61630318  |
| 5.149234495 | 5.018033594 | 5.041788743 |
| 4.935613243 | 4.380474887 | 4.798864424 |
| 4.528975085 | 4.386207603 | 4.920072259 |
| 5.507326231 | 4.762891332 | 4.614952253 |
| 4.836484545 | 5.527393855 | 4.788668635 |
| 5.657809044 | 4.910953436 | 6.040683177 |
| 4.350324221 | 4.604940978 | 6.012165468 |
| 5.4711458   | 5.10460431  | 5.235219807 |
| 6.117446999 | 4.401088622 | 4.375611602 |
| 4.372973939 | 6.317427478 | 6.825320575 |
| 6.980841128 | 5.123604641 | 4.367664379 |
| 5.198906722 | 4.350510934 | 4.781533946 |
| 5.017180251 | 5.033192179 | 4.974321513 |
| 4.700225141 | 5.044792744 | 4.58879356  |
| 5.39824651  | 5.107798188 | 5.637064663 |
| 5.371981833 | 4.527555582 | 5.148881349 |
| 5.850774269 | 5.255124075 | 4.779103139 |
| 4.422728247 | 5.128327399 | 5.447160473 |
| 5.732050853 | 4.843737355 | 5.610107062 |
| 4.788644231 | 4.778099645 | 5.407922959 |
| 5.561729541 | 5.383734311 | 5.150025236 |

|             |             |             |
|-------------|-------------|-------------|
| 5.969853798 | 5.423110488 | 4.965836488 |
| 4.82829974  | 4.529436967 | 5.183262857 |
| 5.604220635 | 5.401568204 | 6.822015033 |
| 5.529494421 | 5.876942031 | 5.110827277 |
| 6.980717805 | 7.185411591 | 6.088460993 |
| 4.873878688 | 4.581644974 | 4.930774754 |
| 4.915417477 | 4.516932868 | 5.323142429 |
| 5.364711434 | 4.536786947 | 4.854667255 |
| 5.198761018 | 4.51839034  | 4.683971762 |
| 4.476008436 | 4.949013066 | 4.630752516 |
| 4.996981129 | 5.491108431 | 6.247536121 |
| 4.990969153 | 4.848877312 | 4.942790877 |
| 4.619007474 | 5.424894387 | 4.876447335 |
| 4.445675592 | 5.937769354 | 4.775851551 |
| 5.83023569  | 4.470098494 | 7.269829637 |
| 5.736728723 | 5.525024581 | 4.947183106 |
| 5.743381142 | 4.890738662 | 5.803928423 |
| 5.347272594 | 5.203018087 | 5.737546659 |
| 5.708401946 | 5.105579667 | 4.704847211 |
| 5.210685154 | 5.222875882 | 5.293001224 |
| 5.393197767 | 4.765652909 | 4.702381406 |
| 5.282810424 | 5.505273496 | 6.035626919 |
| 4.654961013 | 4.449424294 | 5.261280472 |
| 6.04737757  | 4.470430503 | 5.746513998 |
| 5.463643259 | 5.681904472 | 5.313344763 |
| 4.339850136 | 4.491281926 | 4.843461116 |
| 4.915632419 | 4.36819738  | 4.515807341 |
| 4.522258849 | 5.476025138 | 5.883307492 |
| 5.38795875  | 5.112463485 | 4.852400638 |
| 5.425969146 | 4.36883604  | 5.067904094 |
| 6.485043412 | 5.594588941 | 5.599097961 |
| 6.019076051 | 5.580326095 | 4.531183402 |
| 4.863823851 | 4.782374291 | 4.946519696 |
| 5.588798904 | 4.809460257 | 4.945542913 |
| 5.157665178 | 5.290394945 | 4.951922706 |
| 5.748464821 | 5.811306926 | 4.430730966 |
| 4.521214066 | 4.360595239 | 5.566886713 |
| 5.720736171 | 5.175318969 | 5.359704937 |
| 7.238230313 | 4.617436649 | 5.876461209 |
| 5.678370334 | 4.441833274 | 5.431833836 |
| 5.082599687 | 4.371270159 | 4.631732933 |
| 4.812916899 | 4.681873326 | 4.669413346 |
| 4.331294875 | 4.777325553 | 5.58893743  |
| 6.844872262 | 4.394429075 | 7.019304085 |
| 5.972349727 | 5.947565671 | 4.343399757 |
| 4.989404474 | 4.893419712 | 4.356127149 |

|             |             |             |
|-------------|-------------|-------------|
| 5.243256026 | 5.183472512 | 5.74194631  |
| 6.226249795 | 4.429294859 | 5.33208189  |
| 5.1272787   | 4.938822022 | 5.36842637  |
| 5.065315878 | 4.433798516 | 6.244795894 |
| 4.673230703 | 5.17854906  | 4.772540546 |
| 5.823312556 | 5.507560717 | 4.38674943  |
| 6.218477465 | 5.287796539 | 5.617399521 |
| 4.689927761 | 5.566383072 | 5.159824057 |
| 5.353186254 | 5.222564944 | 4.368884363 |
| 5.395769279 | 4.906898856 | 5.212021428 |
| 5.217175385 | 5.847657499 | 4.329707198 |
| 5.092908557 | 4.47928353  | 5.288445764 |
| 5.324238567 | 4.787461682 | 4.653595601 |
| 5.06281856  | 4.628520285 | 4.49964674  |
| 4.929951392 | 4.927776931 | 6.076289203 |
| 5.194307906 | 4.391223717 | 5.184331024 |
| 4.544329705 | 4.590255959 | 5.032630362 |
| 6.729916939 | 5.909957448 | 6.121445088 |
| 4.816687768 | 4.623777007 | 4.833475058 |
| 5.370610904 | 4.361470678 | 4.851585395 |
| 5.003907203 | 4.711799521 | 5.003906386 |
| 4.444860143 | 5.463856956 | 4.544715606 |
| 5.525163681 | 6.115817948 | 4.321119526 |
| 6.005419418 | 5.715615698 | 6.885045428 |
| 4.378981563 | 5.067844762 | 5.847613417 |
| 4.537736047 | 4.800446388 | 4.585216266 |
| 4.355185412 | 5.656751248 | 4.963866464 |
| 4.604200401 | 4.478357469 | 5.182750665 |
| 7.408962384 | 4.533119921 | 7.331796114 |
| 5.741172287 | 5.546797196 | 5.147052738 |
| 5.779120897 | 5.709918693 | 6.326117746 |
| 4.40614169  | 5.98939944  | 6.237450144 |
| 5.501862224 | 4.7635867   | 4.592622387 |
| 4.384018928 | 5.30777384  | 5.236572463 |
| 4.910551805 | 5.208575508 | 5.012089328 |
| 5.601511648 | 5.516247438 | 5.173581642 |
| 4.855117042 | 4.401758202 | 5.675115604 |
| 4.436650163 | 5.404940714 | 5.01771493  |
| 4.415283145 | 4.480024938 | 4.860740463 |
| 5.36678568  | 5.168749324 | 5.442153947 |
| 4.440898141 | 5.255140586 | 6.249484841 |
| 4.790571207 | 4.533832268 | 4.419324093 |
| 5.879797017 | 4.902033885 | 5.525733819 |
| 4.712346613 | 4.487568803 | 4.374388397 |
| 4.965539464 | 4.726133838 | 4.87528528  |
| 4.931116017 | 4.407193907 | 5.052154075 |

|             |             |             |
|-------------|-------------|-------------|
| 4.765869413 | 4.472065685 | 4.799128845 |
| 4.62129608  | 4.817713848 | 4.339700712 |
| 4.586441919 | 5.132728277 | 5.210830001 |
| 5.331827419 | 6.317741388 | 6.003055612 |
| 4.786286524 | 4.483949155 | 5.179690506 |
| 4.709068893 | 4.505788249 | 5.27517398  |
| 4.701451694 | 4.535804488 | 4.725443934 |
| 4.492305071 | 5.496847948 | 5.297816167 |
| 5.617992332 | 4.436145471 | 4.467125474 |
| 5.661196419 | 5.343195363 | 4.757322517 |
| 6.004711828 | 6.334409896 | 6.10366897  |
| 5.390309041 | 4.580856707 | 4.972183346 |
| 5.625158482 | 5.157089937 | 5.06335169  |
| 4.991349587 | 5.05486136  | 5.154106867 |
| 4.857862858 | 4.389713438 | 4.949616715 |
| 4.461248058 | 4.336222023 | 5.064475266 |
| 5.324123041 | 4.661711444 | 4.565638095 |
| 4.390379091 | 5.153001911 | 5.026797296 |
| 5.002415933 | 5.19041673  | 5.412411477 |
| 5.742896298 | 6.112463751 | 5.113859873 |
| 5.174103685 | 4.728514019 | 5.193586926 |
| 4.43270652  | 4.33455471  | 4.897960414 |
| 5.348923313 | 4.375164728 | 5.606416272 |
| 4.856335303 | 4.699779058 | 4.868586306 |
| 4.956921627 | 4.364237151 | 4.758537643 |
| 5.227459253 | 4.860973528 | 4.852345994 |
| 4.855025825 | 4.422265702 | 6.651125127 |
| 4.548046779 | 4.701021014 | 4.606297668 |
| 4.516838877 | 5.503677007 | 5.061455795 |
| 4.742610628 | 4.402373036 | 5.265812896 |
| 4.678061078 | 4.991720801 | 5.412859481 |
| 4.836950659 | 4.756274317 | 4.903399576 |
| 4.833325653 | 5.122101973 | 5.242399597 |
| 4.795695447 | 4.425291838 | 4.753084656 |
| 5.463085746 | 4.345877872 | 5.213587892 |
| 5.532842387 | 4.455216742 | 5.487251454 |
| 6.187552294 | 6.799605892 | 5.75563768  |
| 4.360310706 | 4.689601819 | 4.443139314 |
| 5.127915447 | 4.392414423 | 5.012646702 |
| 4.397900793 | 5.578640587 | 4.587115332 |
| 5.639058041 | 5.123658671 | 5.870315375 |
| 6.812323259 | 6.821923547 | 7.085995988 |
| 4.310814936 | 5.177053847 | 4.993375563 |
| 4.924735923 | 4.799576758 | 5.773028373 |
| 5.686849062 | 4.329639778 | 4.83799437  |
| 5.025166493 | 4.301654768 | 5.255776574 |

|             |             |             |
|-------------|-------------|-------------|
| 4.870602592 | 4.368664578 | 5.214940267 |
| 8.33871401  | 6.655726488 | 7.170538555 |
| 4.912888606 | 5.339928307 | 5.081076507 |
| 4.920626588 | 4.686819973 | 5.398111697 |
| 5.30563986  | 5.455860221 | 5.351448283 |
| 4.635050609 | 5.180490162 | 5.514915333 |
| 4.795107231 | 4.350433913 | 4.66895665  |
| 5.115559673 | 4.378670666 | 5.140158726 |
| 5.224926164 | 4.299516259 | 4.86357981  |
| 4.674490474 | 4.539027212 | 5.10417033  |
| 5.214700804 | 5.635973227 | 4.783110107 |
| 5.365805553 | 4.76019771  | 5.073603256 |
| 4.545648914 | 4.773082734 | 4.367504968 |
| 5.82509365  | 5.124652324 | 5.107587039 |
| 6.270939253 | 5.250798603 | 6.236836308 |
| 5.033732115 | 4.828106512 | 5.394657005 |
| 4.310347614 | 5.301112521 | 4.456869713 |
| 4.853591772 | 4.348815627 | 4.847819722 |
| 4.569057806 | 4.548924449 | 5.100286825 |
| 5.049758358 | 4.427821668 | 4.773197471 |
| 5.086103567 | 4.98234717  | 5.15089958  |
| 5.122874715 | 4.847288966 | 4.518985303 |
| 6.064518759 | 5.576738426 | 4.29966648  |
| 5.335844537 | 5.274755326 | 5.718615806 |
| 4.901748806 | 4.477544945 | 4.414797882 |
| 5.276058908 | 5.443929002 | 5.769875409 |
| 4.64469084  | 4.743373323 | 4.376535999 |
| 4.921606969 | 4.694308151 | 5.590070356 |
| 5.655791128 | 4.931748594 | 5.906061919 |
| 5.479370762 | 4.787375295 | 5.348553904 |
| 4.939689537 | 4.585254112 | 5.359917608 |
| 5.829185212 | 5.182477776 | 4.569621    |
| 5.405907181 | 4.328330549 | 5.114678756 |
| 5.954196547 | 4.309985687 | 4.84527111  |
| 7.52620449  | 5.121291758 | 5.77137842  |
| 6.337898387 | 5.116056082 | 5.32741669  |
| 5.287622383 | 4.575630298 | 5.297786062 |
| 4.421734892 | 5.384860383 | 5.589219388 |
| 5.250697583 | 5.39579868  | 6.560555881 |
| 5.885034209 | 4.661870598 | 5.10978684  |
| 5.241521519 | 5.338892925 | 5.392748645 |
| 6.446926358 | 4.962481207 | 4.398404761 |
| 5.417656597 | 4.986644812 | 4.830154777 |
| 4.735477516 | 4.305853765 | 4.95007884  |
| 4.329971573 | 4.507694198 | 4.983711097 |
| 5.332899357 | 4.619174108 | 4.403715935 |

|             |             |             |
|-------------|-------------|-------------|
| 6.084086426 | 4.478769862 | 6.192818329 |
| 4.556682139 | 4.496096021 | 4.997043804 |
| 5.267688525 | 5.214128537 | 5.469596124 |
| 5.248817473 | 5.61160884  | 4.313648358 |
| 4.615557613 | 4.587158462 | 5.25301993  |
| 5.261020888 | 5.59444493  | 5.007194534 |
| 4.816628504 | 5.433572892 | 4.503263254 |
| 4.765763742 | 5.22769297  | 5.282031011 |
| 4.92540654  | 4.471438275 | 4.487181544 |
| 4.402845259 | 4.412215688 | 4.464063836 |
| 4.29372746  | 4.774800319 | 5.155305104 |
| 5.648261144 | 4.735393928 | 5.522156499 |
| 4.429476089 | 4.903267115 | 4.579508544 |
| 4.761559584 | 5.095260631 | 5.114063275 |
| 6.484339134 | 5.925349914 | 6.051647396 |
| 4.628353136 | 4.491021251 | 4.615340602 |
| 5.535130182 | 5.80641751  | 4.3099537   |
| 5.330450566 | 4.337224761 | 5.205790994 |
| 4.564717399 | 4.438608668 | 4.580663387 |
| 5.102098818 | 4.520203117 | 4.936774796 |
| 4.361913593 | 5.025790843 | 4.956191117 |
| 4.325617161 | 4.972341949 | 4.547600947 |
| 4.271801888 | 7.253749985 | 7.052146961 |
| 4.761751006 | 4.517728399 | 4.908890421 |
| 4.651263229 | 4.361573805 | 4.867545575 |
| 5.290438723 | 5.236138312 | 5.115293205 |
| 5.009672863 | 5.375524686 | 5.534947111 |
| 4.491821317 | 4.622834894 | 4.381912038 |
| 4.686989046 | 4.313611965 | 5.25377948  |
| 4.808540067 | 4.835584809 | 4.736581329 |
| 4.792441813 | 4.295902428 | 5.200695287 |
| 6.635877482 | 4.288313595 | 4.487019498 |
| 5.129331811 | 5.021951234 | 4.374689565 |
| 5.479162943 | 5.178375838 | 4.358973419 |
| 9.52084253  | 4.643301333 | 4.375051835 |
| 4.4104656   | 4.483829182 | 5.045300889 |
| 5.397359115 | 4.552448811 | 5.336353    |
| 5.105493973 | 5.838331681 | 5.509504065 |
| 4.748010971 | 4.765630729 | 4.532394891 |
| 7.572960128 | 6.26328695  | 6.380050676 |
| 5.998915699 | 5.095938541 | 5.582927048 |
| 5.493200567 | 4.631349739 | 4.997644388 |
| 4.629833541 | 5.429736952 | 5.012772615 |
| 5.703730539 | 4.323484673 | 5.110114919 |
| 4.39856602  | 4.964117035 | 4.591100073 |
| 5.97247167  | 4.32008308  | 5.355455251 |



|             |             |             |
|-------------|-------------|-------------|
| 5.122050312 | 5.44700549  | 5.568677835 |
| 4.552874469 | 5.227849207 | 5.188269643 |
| 5.243775374 | 4.438644612 | 5.736994303 |
| 5.003591945 | 4.821141599 | 4.386866622 |
| 4.907216089 | 4.902229641 | 4.314386559 |
| 5.49725116  | 4.792689596 | 4.467250388 |
| 5.373365776 | 4.593367883 | 4.253750447 |
| 4.995105571 | 5.472353363 | 4.778934185 |
| 5.7090891   | 5.251078738 | 4.430958714 |
| 5.052402535 | 5.420518355 | 4.673096997 |
| 5.577443458 | 5.078672395 | 4.27167001  |
| 5.172222239 | 5.129058293 | 5.218839153 |
| 4.504369149 | 5.580888603 | 5.860007837 |
| 5.041223934 | 4.585059995 | 4.897402069 |
| 5.402970718 | 5.03046085  | 4.902027778 |
| 5.471526928 | 4.407966947 | 4.775528252 |
| 4.295321761 | 4.414311247 | 5.08464601  |
| 5.142305365 | 5.29909537  | 5.338278065 |
| 5.02335266  | 4.339987566 | 5.015272249 |
| 5.353981805 | 5.687591487 | 5.715497462 |
| 5.919876495 | 4.517700294 | 5.094387764 |
| 6.123197563 | 6.284746585 | 6.236795424 |
| 4.673460626 | 5.567980582 | 6.455813339 |
| 6.090212032 | 6.070989502 | 6.361354423 |
| 4.654295775 | 4.538783675 | 4.369368273 |
| 5.183949103 | 4.309180525 | 4.696039079 |
| 6.742714281 | 5.755588599 | 6.418023365 |
| 4.889091592 | 5.662742899 | 5.446628604 |
| 5.496249659 | 5.470254149 | 5.84849884  |
| 5.631433681 | 4.580574333 | 5.297641253 |
| 6.124791551 | 5.254751618 | 5.390786554 |
| 5.315882768 | 4.456205273 | 4.652185681 |
| 4.676781708 | 4.319240733 | 4.996958333 |
| 5.140924771 | 6.704950244 | 6.044984336 |
| 4.890777907 | 4.698635349 | 4.403022477 |
| 4.737984426 | 4.903410388 | 4.954864535 |
| 5.215766559 | 5.087037875 | 4.518517869 |
| 5.672447468 | 4.49556082  | 5.538155773 |
| 5.267861688 | 4.995960588 | 5.358069054 |
| 5.488829146 | 4.501951377 | 4.330971513 |
| 5.221621392 | 4.468607346 | 4.813112218 |
| 4.980183302 | 5.267392488 | 5.004399094 |
| 5.619098144 | 4.352561232 | 5.490599133 |
| 4.586472149 | 4.728875979 | 4.516913692 |
| 6.850991725 | 5.396538989 | 5.066963903 |
| 5.471814236 | 5.851607188 | 4.956626821 |

|             |             |             |
|-------------|-------------|-------------|
| 4.980896459 | 4.460838745 | 5.397017722 |
| 6.33693105  | 5.020690646 | 4.664151317 |
| 4.239673066 | 4.952463811 | 4.599452799 |
| 4.265360689 | 5.339890088 | 4.603953166 |
| 5.390213908 | 4.639031339 | 4.285102517 |
| 4.248011726 | 4.8672931   | 5.268310978 |
| 4.776839455 | 5.201689064 | 4.624536648 |
| 5.734975413 | 6.816606943 | 4.389404625 |
| 5.329916046 | 4.559907751 | 5.226287291 |
| 5.860447081 | 5.671356667 | 5.62521864  |
| 5.544134469 | 4.339102655 | 5.089603725 |
| 4.764384912 | 4.333078074 | 5.231100578 |
| 5.040614372 | 4.810887307 | 4.228103342 |
| 5.121814207 | 4.855574949 | 5.666035854 |
| 4.445799537 | 4.34599839  | 4.749906497 |
| 5.564150221 | 4.890553807 | 4.495926979 |
| 4.630275755 | 4.787403136 | 4.744565894 |
| 4.539200043 | 4.283154441 | 4.417831276 |
| 4.236364707 | 4.569929818 | 5.206511104 |
| 6.030511672 | 4.392885249 | 5.53751257  |
| 6.018016823 | 4.644959489 | 6.478720641 |
| 5.337059272 | 4.928933196 | 4.699238496 |
| 4.325203958 | 4.40955266  | 7.597246567 |
| 4.537135955 | 4.801175645 | 4.691846527 |
| 4.437721924 | 4.267008608 | 4.641092347 |
| 4.907948072 | 4.862310469 | 4.278180842 |
| 4.339009731 | 5.189524158 | 5.122247748 |
| 5.287158455 | 4.47033544  | 5.05334146  |
| 5.268097679 | 4.387342153 | 4.597699095 |
| 5.481856593 | 5.401247916 | 4.993289638 |
| 4.953335445 | 4.800706628 | 5.132770757 |
| 5.818750515 | 4.285335884 | 5.360791123 |
| 5.382926658 | 4.790980627 | 4.726756018 |
| 4.253899891 | 4.541853856 | 4.491321398 |
| 4.51017597  | 6.170283615 | 4.307974762 |
| 5.293636871 | 4.659558518 | 4.928022852 |
| 5.050736399 | 4.214535418 | 5.260115135 |
| 4.590491175 | 4.517702315 | 4.993384752 |
| 4.409960237 | 5.161122723 | 5.099973096 |
| 6.478485489 | 7.128591517 | 6.708488372 |
| 4.60602825  | 4.349591009 | 4.539582931 |
| 4.415304451 | 4.271093595 | 5.679212395 |
| 4.726446675 | 4.274396992 | 4.339785145 |
| 5.70594977  | 4.716214151 | 4.343201688 |
| 4.427171772 | 4.473397137 | 5.112383063 |
| 6.399134845 | 4.919092031 | 6.726196978 |

|             |             |             |
|-------------|-------------|-------------|
| 5.275747661 | 4.747299714 | 4.515058565 |
| 5.310773326 | 4.959815328 | 5.32371816  |
| 5.725205634 | 6.463246869 | 6.635519248 |
| 6.055044796 | 4.257094384 | 5.200516554 |
| 5.621459438 | 5.174001868 | 5.883321872 |
| 5.113418204 | 5.807705491 | 5.667759771 |
| 5.331102503 | 4.266571868 | 4.269996589 |
| 5.488603163 | 4.644331924 | 4.265333207 |
| 5.168075458 | 4.200952057 | 5.022071828 |
| 4.22288771  | 4.410317158 | 4.461132346 |
| 4.791189274 | 4.475694759 | 4.423079523 |
| 4.269477535 | 4.747751388 | 6.115079581 |
| 6.387945368 | 4.426128179 | 4.860433502 |
| 6.003842114 | 4.666103234 | 5.504461896 |
| 4.900086035 | 4.845776322 | 4.230724922 |
| 5.554363162 | 4.277954518 | 5.075796085 |
| 6.191825906 | 4.802934587 | 5.145717982 |
| 4.718554929 | 4.227928296 | 4.847553725 |
| 5.079935159 | 4.406866692 | 5.284918403 |
| 6.666957389 | 5.660706301 | 5.559926172 |
| 4.654060418 | 4.262323975 | 4.326823478 |
| 4.241927376 | 4.972286479 | 4.899058709 |
| 5.336974861 | 4.50958243  | 4.997517061 |
| 5.707087139 | 4.992625185 | 5.031312623 |
| 5.028109261 | 6.174572849 | 5.725832687 |
| 5.200409359 | 4.427843456 | 4.970094053 |
| 5.79221961  | 4.87634277  | 5.287355849 |
| 4.703883107 | 6.122715172 | 6.104981481 |
| 5.069942903 | 4.237365825 | 4.81956118  |
| 4.469728149 | 4.488493389 | 4.299981959 |
| 5.268218717 | 4.263255293 | 4.704994253 |
| 4.940218786 | 4.240082145 | 4.434569247 |
| 4.573536511 | 4.655670082 | 4.649696454 |
| 5.605162857 | 5.363369923 | 5.408364111 |
| 6.42499244  | 4.478578744 | 4.638442493 |
| 5.006046028 | 5.490227884 | 5.024926356 |
| 5.229583003 | 4.237436919 | 4.919038377 |
| 4.915398474 | 4.287021769 | 4.398470081 |
| 5.422207504 | 5.117950288 | 5.296925193 |
| 5.078328443 | 4.264282174 | 4.770658596 |
| 6.367612525 | 4.368616744 | 5.43918162  |
| 4.653596967 | 5.05514769  | 4.54127795  |
| 6.836543882 | 4.280004138 | 6.801069377 |
| 5.873937332 | 6.25970205  | 4.963707343 |
| 4.633783535 | 4.201175128 | 5.234804863 |
| 5.49389961  | 5.018905877 | 5.421791575 |

|             |             |             |
|-------------|-------------|-------------|
| 6.458320686 | 4.608157734 | 5.192148414 |
| 4.49314202  | 4.454343378 | 4.239241407 |
| 4.857359725 | 4.537161651 | 4.342586603 |
| 4.521829874 | 4.247422151 | 4.392875958 |
| 4.988752967 | 5.011334298 | 4.275021825 |
| 6.732376328 | 5.839429424 | 5.886592626 |
| 4.82921612  | 4.599300584 | 4.604409447 |
| 4.75345357  | 4.654363962 | 5.588941272 |
| 4.627750371 | 4.22447124  | 4.92290364  |
| 4.286872021 | 5.253786138 | 6.415538244 |
| 5.098137106 | 4.284875116 | 5.066834976 |
| 4.96142006  | 5.646210417 | 4.33966799  |
| 6.238877658 | 6.883307539 | 6.342284205 |
| 4.175885656 | 4.706185744 | 4.460046462 |
| 4.259837364 | 4.347743284 | 5.769980206 |
| 4.360748804 | 4.701162551 | 5.038311649 |
| 6.370945719 | 5.705205349 | 6.675184834 |
| 5.293291853 | 5.265084156 | 4.601138153 |
| 5.110687456 | 5.192430059 | 5.191210032 |
| 4.728854671 | 4.258098201 | 5.19680437  |
| 4.683277619 | 4.496379955 | 4.349796806 |
| 5.363258497 | 4.235237558 | 5.497098955 |
| 4.211395809 | 5.342045352 | 4.73639595  |
| 4.669203953 | 4.456875728 | 5.435924295 |
| 5.458114991 | 5.102678824 | 4.203490662 |
| 5.294508314 | 6.005745851 | 5.250598703 |
| 4.384515576 | 5.056416986 | 4.433913517 |
| 4.323436632 | 5.195643226 | 6.338868021 |
| 5.911354375 | 6.526312796 | 5.366642137 |
| 4.26246231  | 4.619017355 | 4.737271554 |
| 5.193610755 | 4.760946709 | 4.776456077 |
| 4.49862774  | 4.494854254 | 4.32098843  |
| 5.840994333 | 4.832463916 | 4.386236714 |
| 5.391278369 | 5.926268806 | 5.418679142 |
| 4.597722671 | 4.522178245 | 5.026454761 |
| 5.461880439 | 4.861509157 | 4.846858784 |
| 5.154336548 | 4.536145193 | 4.516931409 |
| 4.922263677 | 5.001132301 | 4.310938672 |
| 4.509327751 | 4.509099659 | 4.472060613 |
| 5.175212337 | 4.17459746  | 5.360421779 |
| 5.334309836 | 4.73755117  | 5.235470924 |
| 5.143486426 | 4.423668304 | 5.015921141 |
| 5.113003992 | 5.004065888 | 4.47733793  |
| 5.234719926 | 4.651153288 | 5.12148092  |
| 4.885414199 | 4.248887769 | 4.694158153 |
| 5.247178752 | 5.00692971  | 4.886018672 |

|             |             |             |
|-------------|-------------|-------------|
| 4.57667921  | 5.255989312 | 4.992714529 |
| 6.000299509 | 5.064759839 | 4.304464203 |
| 4.355651969 | 4.887470572 | 4.165424214 |
| 4.672776177 | 4.391441159 | 4.522116366 |
| 4.262848552 | 4.525158249 | 4.834397758 |
| 5.689253192 | 5.004693541 | 6.657025679 |
| 5.025373272 | 4.166030233 | 4.8876834   |
| 4.715547665 | 4.31077923  | 4.939876536 |
| 5.558428064 | 4.689017772 | 4.660205391 |
| 5.573280205 | 6.164240477 | 4.396146186 |
| 5.601461194 | 4.787329479 | 5.289515694 |
| 4.89278193  | 5.126670402 | 4.793184292 |
| 4.48200472  | 4.912688968 | 4.789283634 |
| 4.19291301  | 4.736039704 | 5.386399083 |
| 4.232090606 | 4.646004785 | 4.434150396 |
| 5.249007    | 4.998979407 | 4.682928981 |
| 4.258748123 | 4.29956127  | 4.797946712 |
| 5.529577951 | 4.718342096 | 5.66828656  |
| 4.422787612 | 4.854301683 | 5.263035515 |
| 4.533013956 | 5.963545694 | 5.761955458 |
| 4.512753891 | 4.903169656 | 5.586788908 |
| 6.279774693 | 4.963542851 | 4.1914318   |
| 5.478088588 | 5.386784008 | 5.1393239   |
| 5.505892452 | 4.823717848 | 4.845663745 |
| 4.634339565 | 5.5001751   | 5.33173956  |
| 5.777351422 | 4.174200737 | 5.698220852 |
| 4.401732373 | 4.491274825 | 4.872480151 |
| 5.882958859 | 4.614226747 | 4.251867442 |
| 5.721568015 | 5.15174713  | 4.920871207 |
| 4.626817756 | 4.582142642 | 4.933543282 |
| 5.179939263 | 4.486981272 | 4.862114243 |
| 5.049168746 | 4.252313121 | 4.928811673 |
| 4.702256381 | 4.512531317 | 4.810652383 |
| 4.55413313  | 5.28068049  | 5.105698295 |
| 5.371271957 | 4.224001938 | 4.55284166  |
| 4.634939257 | 4.71969189  | 4.836178562 |
| 5.034735062 | 4.708832362 | 5.377429053 |
| 4.547813596 | 4.65359153  | 5.209547671 |
| 5.121615592 | 4.829713061 | 5.189010164 |
| 4.618888336 | 4.747854689 | 5.214007488 |
| 5.157115454 | 4.458394775 | 4.782460683 |
| 5.423216664 | 4.635069803 | 4.693982896 |
| 4.849836995 | 4.52718352  | 4.358066445 |
| 5.232078141 | 4.23083969  | 5.108063607 |
| 5.079291277 | 4.303610592 | 4.414845199 |
| 5.666973243 | 5.293876728 | 4.504549566 |

|             |             |             |
|-------------|-------------|-------------|
| 4.782621784 | 4.75905241  | 4.188276674 |
| 5.105646164 | 4.258524798 | 4.619162232 |
| 5.117077727 | 4.449209151 | 5.204866191 |
| 5.220731869 | 5.077188209 | 4.54768559  |
| 5.46419247  | 4.720881184 | 4.452936642 |
| 4.90124602  | 4.264792359 | 5.313948502 |
| 5.254731199 | 5.695200928 | 4.953119944 |
| 4.164206015 | 5.989377012 | 6.359413055 |
| 5.694281214 | 4.231137044 | 5.478797048 |
| 4.153526336 | 4.88596456  | 5.321469399 |
| 5.182158386 | 4.610099033 | 4.970162407 |
| 4.565326153 | 4.965747796 | 4.192885119 |
| 5.138198434 | 5.378975275 | 4.284272195 |
| 5.329881707 | 4.153728789 | 5.488204238 |
| 5.426348439 | 7.056512731 | 4.552437084 |
| 4.990244425 | 4.331748769 | 4.747196332 |
| 5.589763159 | 4.569308098 | 6.894112074 |
| 4.510896755 | 5.036877282 | 5.286114432 |
| 5.703711503 | 4.288539627 | 4.984930084 |
| 5.87550336  | 5.041729776 | 5.198890908 |
| 5.75848073  | 5.012966319 | 5.006342453 |
| 6.199285171 | 5.375955769 | 4.746096854 |
| 5.781635097 | 4.511367475 | 4.75210664  |
| 5.576748302 | 4.351895999 | 6.110810089 |
| 4.206368279 | 4.870108662 | 4.546406407 |
| 7.109915283 | 4.277180836 | 7.304694569 |
| 5.326082379 | 4.197907085 | 4.895522796 |
| 5.382578794 | 4.24091694  | 4.926033831 |
| 4.316701754 | 4.628482442 | 4.94770378  |
| 5.656962054 | 5.295191772 | 5.309479392 |
| 5.335049829 | 4.964146341 | 5.244965883 |
| 5.2045484   | 4.596397474 | 4.590243948 |
| 4.525914717 | 4.205070521 | 5.544932935 |
| 5.183345099 | 4.993354453 | 5.563976215 |
| 4.189203143 | 4.340214288 | 4.831170359 |
| 4.820895695 | 5.064707717 | 4.283995475 |
| 4.822668614 | 4.250606604 | 4.433428037 |
| 4.587997996 | 5.00115057  | 4.898509587 |
| 5.577308307 | 5.968539253 | 4.936579904 |
| 4.38821521  | 4.321145686 | 4.403377269 |
| 6.233938078 | 4.371338969 | 5.684848116 |
| 4.360927875 | 4.808903565 | 4.32938614  |
| 4.23828752  | 5.011716436 | 4.746838983 |
| 5.098216979 | 4.885879097 | 4.810935897 |
| 5.486210839 | 5.68498563  | 4.247486264 |
| 4.250520719 | 4.226986849 | 5.564287519 |

|             |             |             |
|-------------|-------------|-------------|
| 5.361040932 | 5.060313494 | 5.64689957  |
| 4.676744559 | 4.616860185 | 4.249085136 |
| 4.812250821 | 4.775672623 | 5.688746386 |
| 4.62977019  | 4.399885151 | 5.188572762 |
| 5.061653778 | 4.13676372  | 5.651805983 |
| 5.315425096 | 4.865992032 | 5.342781589 |
| 5.772407262 | 4.184696476 | 5.407726367 |
| 5.313624659 | 4.470653826 | 5.125394574 |
| 5.557426005 | 5.352920005 | 5.403680151 |
| 5.135723782 | 4.88490233  | 4.609089237 |
| 6.69788026  | 4.881564432 | 6.470391641 |
| 5.431006892 | 5.121405526 | 5.25832546  |
| 4.477714442 | 4.284133774 | 4.390330974 |
| 5.014309325 | 4.442694268 | 4.505801613 |
| 5.300047035 | 4.141177318 | 5.263421853 |
| 6.464349919 | 5.329317093 | 5.742958719 |
| 4.952137984 | 5.24118252  | 5.954059377 |
| 4.181682082 | 4.541229459 | 4.974550318 |
| 4.764203206 | 4.310220249 | 5.039363035 |
| 5.668717992 | 5.634601264 | 4.278483349 |
| 4.651926053 | 4.214166828 | 4.855969041 |
| 4.846199834 | 4.218314987 | 4.54241633  |
| 6.184656375 | 5.621586693 | 5.561342961 |
| 6.191931516 | 5.431168404 | 4.36207069  |
| 5.378825361 | 5.457023443 | 4.275532992 |
| 4.158934582 | 5.129358531 | 5.37789025  |
| 5.823583482 | 6.230277217 | 6.427952576 |
| 4.137769328 | 4.62047819  | 5.023555353 |
| 5.533042393 | 4.813225942 | 4.829309336 |
| 4.447799186 | 4.180729314 | 5.218680996 |
| 4.840453876 | 4.385692788 | 4.560681161 |
| 4.217513366 | 4.396065407 | 4.519561309 |
| 4.422963    | 4.596662718 | 4.188852103 |
| 4.739726423 | 4.467196454 | 4.920029099 |
| 6.182198192 | 4.144036891 | 7.628738289 |
| 4.730263546 | 4.199884402 | 4.945807183 |
| 6.263908909 | 4.222791307 | 5.233222943 |
| 4.370510559 | 4.14128059  | 4.644919714 |
| 6.41710034  | 4.694517127 | 5.423018851 |
| 4.616287712 | 5.318646881 | 6.166837347 |
| 4.366377483 | 4.178212737 | 4.463135103 |
| 4.439552615 | 5.434624899 | 5.187053648 |
| 5.201548391 | 4.774431937 | 4.924772518 |
| 6.223157897 | 4.111027593 | 4.327695347 |
| 5.231394529 | 4.764017734 | 5.493932344 |
| 5.485909433 | 5.02033184  | 5.304487269 |

|             |             |             |
|-------------|-------------|-------------|
| 4.180192242 | 4.154030458 | 4.816726899 |
| 5.07723206  | 4.840879117 | 4.331638479 |
| 6.332009627 | 4.993553744 | 4.313551398 |
| 5.419000888 | 4.877112626 | 4.182713332 |
| 5.294376676 | 4.130094069 | 4.846016611 |
| 7.008673429 | 7.022805433 | 6.933404577 |
| 4.535569425 | 4.603266979 | 4.142585692 |
| 4.763301104 | 5.78572305  | 5.13301834  |
| 4.28900423  | 5.097902747 | 5.737926472 |
| 4.767031568 | 4.386309657 | 5.114687854 |
| 4.799675082 | 5.251333738 | 5.293811589 |
| 4.561196591 | 4.411690546 | 4.185689465 |
| 4.855212909 | 4.244186568 | 4.461482984 |
| 4.797249281 | 4.427139462 | 4.442419261 |
| 4.68788716  | 4.606704816 | 4.885859419 |
| 4.733408566 | 4.2540936   | 4.189340834 |
| 4.921759587 | 4.223837221 | 4.300403456 |
| 4.283823597 | 5.27277244  | 5.697714696 |
| 4.174538241 | 6.341473196 | 6.010619019 |
| 5.437968803 | 5.494732874 | 5.920811107 |
| 4.684961914 | 4.912424594 | 4.480431528 |
| 4.37469754  | 4.52907495  | 5.132962518 |
| 4.957194899 | 4.22648546  | 5.382570573 |
| 4.576443309 | 5.369947742 | 4.97623351  |
| 5.01608402  | 4.591142232 | 4.368454163 |
| 4.95546127  | 4.762779405 | 5.321258757 |
| 4.518002844 | 4.849274267 | 4.67030395  |
| 4.458651282 | 4.493127679 | 6.284844797 |
| 4.663981774 | 4.427647742 | 4.937338259 |
| 6.247052781 | 6.707359351 | 4.185519502 |
| 5.877166704 | 5.371429401 | 5.233971074 |
| 5.59552515  | 5.298557836 | 5.040571672 |
| 5.036884751 | 4.13863308  | 4.847185671 |
| 4.554980143 | 4.463147824 | 4.276431999 |
| 5.687322893 | 4.352415356 | 5.276572032 |
| 6.010515511 | 5.170292698 | 5.750560653 |
| 5.620929888 | 4.991054623 | 4.546571364 |
| 5.34722872  | 6.530338107 | 4.35862914  |
| 5.193734931 | 4.259325368 | 5.045865526 |
| 5.185606562 | 4.71091859  | 4.708570969 |
| 5.561772991 | 4.5906347   | 5.229278138 |
| 4.820406032 | 4.115876251 | 5.038310144 |
| 5.749554757 | 5.099447502 | 4.853802413 |
| 5.187786012 | 5.068590955 | 5.314349207 |
| 5.44785682  | 4.866971131 | 4.594990924 |
| 5.613195091 | 4.656129247 | 5.048857157 |



|             |             |             |
|-------------|-------------|-------------|
| 4.271295335 | 5.016030052 | 5.570755686 |
| 4.913348923 | 4.157699465 | 5.281552    |
| 4.43586356  | 4.1656762   | 4.127700885 |
| 4.896107279 | 4.202662484 | 4.683544562 |
| 4.753198965 | 5.033936997 | 4.966230863 |
| 4.752683307 | 5.727197855 | 5.875407038 |
| 4.533205877 | 5.375133422 | 5.29199481  |
| 4.987722404 | 4.214891753 | 5.958656294 |
| 4.83495516  | 4.461549275 | 5.680174268 |
| 5.50324152  | 4.679341271 | 5.41468376  |
| 5.421043887 | 4.18317581  | 4.533858579 |
| 4.707268603 | 4.212118594 | 4.505418607 |
| 4.128194186 | 5.000716382 | 4.670261461 |
| 5.83526232  | 4.804011355 | 5.399125632 |
| 4.424611934 | 6.425425447 | 4.892017135 |
| 4.836586047 | 4.611388967 | 5.123105868 |
| 4.278491152 | 4.279987562 | 4.663407808 |
| 6.704436052 | 4.12229041  | 5.164245465 |
| 5.520091854 | 4.121194492 | 4.920786355 |
| 4.998120221 | 5.481686277 | 4.567314736 |
| 5.63675937  | 5.530039783 | 4.123765142 |
| 4.894938489 | 4.168467918 | 4.91562821  |
| 5.243574508 | 4.341057898 | 4.707217848 |
| 7.242752138 | 5.634719215 | 6.101104203 |
| 5.278730146 | 4.826154656 | 4.30377391  |
| 4.345067022 | 4.585691452 | 4.275098512 |
| 4.904067101 | 4.111328382 | 5.018402518 |
| 4.153253824 | 4.906844959 | 4.820403325 |
| 5.057709944 | 5.442044029 | 4.128878392 |
| 5.030029296 | 4.482706779 | 6.938552208 |
| 4.559137828 | 4.46027735  | 4.778776842 |
| 4.320490331 | 4.897229506 | 4.751490786 |
| 5.340300778 | 4.131014713 | 6.297892383 |
| 5.412236203 | 4.245472073 | 4.554946317 |
| 4.67401075  | 4.867525332 | 4.413334467 |
| 4.406488619 | 4.69622123  | 4.174290052 |
| 5.564518633 | 4.145748408 | 5.232963916 |
| 4.56569863  | 4.725208228 | 4.27160662  |
| 4.428158624 | 4.896195537 | 4.811398563 |
| 4.161585983 | 4.475988124 | 4.459020097 |
| 4.435665543 | 4.464388083 | 4.536139272 |
| 6.67889268  | 5.165485146 | 5.195221916 |
| 5.384360553 | 4.184790689 | 4.607544741 |
| 5.138001246 | 4.573785797 | 5.516513457 |
| 5.01849253  | 4.192857908 | 7.086541265 |
| 4.81744869  | 4.811277586 | 6.664415727 |

|             |             |             |
|-------------|-------------|-------------|
| 4.779593452 | 4.127608511 | 4.963658872 |
| 4.608584016 | 5.005279984 | 4.891574923 |
| 4.989113701 | 4.217696282 | 5.06854837  |
| 4.94631704  | 5.267935083 | 4.954270665 |
| 4.721102405 | 4.24093362  | 4.165935466 |
| 5.866902526 | 4.133605493 | 4.43396183  |
| 5.256779399 | 5.777856117 | 5.671806356 |
| 4.736537462 | 4.169977508 | 4.720739148 |
| 5.110226407 | 4.743642124 | 5.15577217  |
| 4.590657146 | 5.339452292 | 4.578352045 |
| 5.697182604 | 4.876298208 | 4.680662577 |
| 5.268976221 | 4.977492629 | 4.734921674 |
| 4.702841504 | 4.217207327 | 4.334841169 |
| 4.48359439  | 4.654853777 | 4.180535382 |
| 4.834284466 | 4.11269328  | 4.945426523 |
| 5.43765467  | 4.557942319 | 4.718637215 |
| 5.297478206 | 4.107153442 | 5.854756669 |
| 4.928976578 | 4.226742684 | 5.097021314 |
| 7.271581752 | 5.908458713 | 5.469835768 |
| 5.004446662 | 4.131562787 | 4.781810977 |
| 4.103962266 | 4.685285254 | 4.306122574 |
| 4.137056212 | 4.670753913 | 4.970508425 |
| 4.748740965 | 4.252470347 | 4.16360103  |
| 5.081644579 | 4.42140054  | 4.878448451 |
| 4.403758349 | 4.51238051  | 5.606448913 |
| 4.14975122  | 4.695430595 | 4.360964407 |
| 5.274072376 | 4.364460418 | 5.24630358  |
| 4.790033217 | 4.643905242 | 4.323938678 |
| 4.239942778 | 5.285024345 | 4.650446839 |
| 4.40865275  | 4.150070968 | 4.150817541 |
| 5.865883765 | 4.889890679 | 4.345181744 |
| 5.044538748 | 5.465044116 | 4.783979517 |
| 5.141675007 | 5.133266671 | 5.124620328 |
| 5.550373886 | 4.807666155 | 4.307485515 |
| 4.323305388 | 4.263622557 | 5.143745153 |
| 5.150543589 | 4.080190854 | 5.145500068 |
| 5.110873879 | 4.578555168 | 4.110553743 |
| 4.08794432  | 4.422673919 | 4.387606091 |
| 4.665925837 | 5.669723466 | 4.397212338 |
| 4.692492286 | 4.385913477 | 4.395979919 |
| 4.982568265 | 4.235493895 | 4.390575855 |
| 4.691451721 | 5.147433912 | 4.915380039 |
| 5.336426721 | 4.298374698 | 5.298886905 |
| 6.496864812 | 4.252459824 | 5.148161783 |
| 4.542036506 | 4.797653031 | 5.040088601 |
| 4.684690501 | 4.169040262 | 4.296257428 |

|             |             |             |
|-------------|-------------|-------------|
| 4.070120008 | 4.394519546 | 4.929493034 |
| 4.769491989 | 5.640744099 | 5.029541278 |
| 5.627447554 | 4.323949002 | 4.717959805 |
| 4.823005402 | 5.248693872 | 4.179752547 |
| 4.706741328 | 4.543139569 | 4.267365159 |
| 4.109052176 | 4.712224037 | 5.144303346 |
| 4.605216199 | 4.166476823 | 4.74894897  |
| 5.073687647 | 4.832859167 | 4.878371221 |
| 5.528876689 | 4.083582343 | 5.113851921 |
| 6.319039775 | 5.684492365 | 5.016111091 |
| 4.207587934 | 5.133139655 | 5.033222929 |
| 4.469717501 | 4.333030652 | 4.666156261 |
| 5.277591563 | 4.106186964 | 5.174139827 |
| 4.851267697 | 4.194116268 | 5.186821416 |
| 4.158297539 | 6.025790926 | 5.566341354 |
| 5.231835168 | 4.951119212 | 5.126949864 |
| 4.409483489 | 4.429561364 | 4.628794123 |
| 4.500115738 | 4.183770772 | 4.390993929 |
| 4.668079816 | 4.155827644 | 5.096574822 |
| 5.769273137 | 5.050462943 | 4.422914052 |
| 5.192621777 | 5.737621324 | 4.402487342 |
| 5.879573651 | 4.160703849 | 5.471237941 |
| 4.10741849  | 4.668142856 | 4.649927922 |
| 4.385317834 | 4.912455383 | 5.525788193 |
| 5.375449801 | 4.891407389 | 4.342337856 |
| 4.151359487 | 6.191068279 | 4.999159382 |
| 4.800975537 | 4.618334346 | 5.07204168  |
| 4.904272705 | 4.634985872 | 4.477940326 |
| 4.101396024 | 4.26836475  | 4.854813898 |
| 5.357147487 | 4.65708801  | 4.145181619 |
| 5.097248063 | 4.123193056 | 4.987934749 |
| 5.474130697 | 5.509570128 | 4.675504312 |
| 5.384361771 | 4.26589122  | 4.333199526 |
| 6.383265049 | 5.941360984 | 4.839176224 |
| 4.087592498 | 5.161561389 | 5.42284241  |
| 5.538229019 | 5.158489919 | 4.608977739 |
| 4.601516273 | 4.19861496  | 5.317692851 |
| 4.243120707 | 4.487508233 | 4.942551063 |
| 4.913816219 | 4.871023618 | 5.797391311 |
| 6.037963289 | 4.864886644 | 6.054042175 |
| 4.747063397 | 5.532146876 | 4.31726122  |
| 4.442030877 | 4.376000481 | 4.178379229 |
| 5.371066498 | 4.344806079 | 5.105228916 |
| 4.607473001 | 4.11394258  | 4.909632993 |
| 5.178569839 | 4.143982472 | 4.977635581 |
| 5.009674801 | 5.274671491 | 4.805128923 |

|             |             |             |
|-------------|-------------|-------------|
| 4.198215108 | 5.1121949   | 4.532486789 |
| 4.402829127 | 4.197827271 | 4.499825402 |
| 5.569181939 | 5.01276969  | 4.532284798 |
| 5.271039689 | 5.230744878 | 6.653740008 |
| 5.006299624 | 4.180659318 | 5.220738672 |
| 4.469738401 | 4.556802662 | 4.389403363 |
| 5.585860005 | 4.834643386 | 5.836429974 |
| 5.157270358 | 4.926797693 | 5.120878552 |
| 4.747443609 | 4.082241664 | 4.685650334 |
| 4.545450634 | 4.550081281 | 4.694208195 |
| 4.860947916 | 4.955525133 | 4.36626719  |
| 5.057219957 | 4.198456146 | 4.526480878 |
| 5.995615981 | 5.068079011 | 4.154771546 |
| 5.468563919 | 5.23605762  | 5.703798314 |
| 4.380229383 | 4.403453847 | 5.076067429 |
| 4.483120464 | 4.089652145 | 4.60822092  |
| 5.259352171 | 4.126589084 | 4.977531272 |
| 7.220671568 | 5.438121888 | 6.272460797 |
| 4.243639335 | 5.504881982 | 5.709156687 |
| 5.455906639 | 4.644157638 | 4.118863742 |
| 4.656868994 | 4.28922835  | 4.471404231 |
| 6.548869841 | 6.135610491 | 4.807732219 |
| 4.91960658  | 4.34488015  | 4.211736015 |
| 5.063043239 | 4.20290195  | 4.595749078 |
| 4.93977804  | 4.757771391 | 5.182664645 |
| 6.171824744 | 6.231732236 | 5.148836999 |
| 5.648409142 | 5.375024444 | 5.34323222  |
| 4.173509453 | 4.613638806 | 4.292648105 |
| 5.3246159   | 4.180718311 | 4.523852348 |
| 4.938551638 | 4.313140644 | 5.155649026 |
| 4.197268024 | 4.848999451 | 4.339975947 |
| 4.62823789  | 4.101074147 | 4.607235933 |
| 6.064873522 | 6.418259174 | 4.730866623 |
| 5.175002547 | 4.457020865 | 5.537576728 |
| 5.444394358 | 5.076633575 | 5.719169359 |
| 5.514002736 | 4.962386539 | 4.800770256 |
| 4.734270397 | 4.210250643 | 4.282388594 |
| 4.89759894  | 5.643617436 | 5.864123867 |
| 4.037256201 | 4.787933144 | 4.9969122   |
| 4.450581951 | 4.119075307 | 5.224111878 |
| 5.336710802 | 4.158320813 | 4.775362016 |
| 4.437548373 | 4.329731109 | 4.696302054 |
| 4.821118876 | 4.317600839 | 5.051030625 |
| 4.258643304 | 4.884469495 | 4.387665342 |
| 4.843643382 | 5.28630311  | 6.063033515 |
| 5.263235347 | 5.013668784 | 4.448820165 |

|             |             |             |
|-------------|-------------|-------------|
| 4.175704457 | 4.275073188 | 7.545633842 |
| 5.253722046 | 5.346924966 | 4.033191291 |
| 5.019336214 | 4.765443425 | 4.925125083 |
| 4.747470235 | 5.416028004 | 5.257376859 |
| 4.547621049 | 4.318169287 | 4.821033925 |
| 4.79439662  | 4.399497009 | 4.555923856 |
| 5.7476303   | 4.333073471 | 4.500683936 |
| 4.895516425 | 5.378791873 | 4.183536591 |
| 5.153507062 | 5.607978534 | 5.410452004 |
| 6.739966055 | 5.135477791 | 6.311063481 |
| 4.940141097 | 4.191679621 | 4.40470261  |
| 5.122356549 | 4.218935743 | 4.839202989 |
| 4.135061419 | 4.920467017 | 4.666590621 |
| 4.121779361 | 5.896101574 | 5.510701396 |
| 6.183025872 | 5.29457233  | 5.706182268 |
| 4.272732513 | 4.613388276 | 4.801776832 |
| 5.479064643 | 4.068468119 | 5.799632513 |
| 4.321446558 | 4.720039832 | 4.858504696 |
| 5.292705341 | 5.513534278 | 4.4674169   |
| 4.994468818 | 4.618106071 | 5.454544417 |
| 4.170838331 | 4.747811673 | 5.299234424 |
| 5.425474909 | 4.534650653 | 4.581606107 |
| 4.499945139 | 4.504010511 | 4.653160765 |
| 4.773156681 | 4.755609336 | 5.322564126 |
| 5.023021434 | 4.095916523 | 4.76618328  |
| 4.219410923 | 4.101660087 | 5.738165125 |
| 4.877149451 | 4.472248265 | 4.363857995 |
| 5.472668532 | 4.417726825 | 4.64635569  |
| 5.631717297 | 4.948977704 | 4.632871998 |
| 4.071666446 | 5.100493262 | 6.033315679 |
| 5.281248398 | 5.048006096 | 4.726448959 |
| 5.392469083 | 5.128976788 | 6.461872609 |
| 4.634040046 | 4.315115799 | 4.20559945  |
| 4.686641268 | 4.830116158 | 4.159932959 |
| 6.464747578 | 5.515129925 | 4.70743156  |
| 4.797746612 | 4.475210165 | 4.06037452  |
| 4.232662846 | 4.876596036 | 4.723772754 |
| 4.201090168 | 4.366688348 | 4.425718233 |
| 4.197608998 | 4.16755154  | 5.643779657 |
| 4.705678706 | 4.440409239 | 4.756158181 |
| 4.774640834 | 4.685770298 | 4.655375268 |
| 4.801098276 | 4.163958105 | 4.833992155 |
| 4.548335412 | 4.175611436 | 4.553874982 |
| 4.165094938 | 4.406446199 | 5.476363609 |
| 4.798991392 | 4.542340902 | 4.27150306  |
| 5.105043481 | 4.757707819 | 4.131273217 |

|             |             |             |
|-------------|-------------|-------------|
| 4.619842254 | 5.092930887 | 4.168155391 |
| 4.796167058 | 5.031794818 | 5.887168828 |
| 6.321538692 | 4.029372443 | 6.27789969  |
| 4.151837545 | 4.37942341  | 4.483787802 |
| 5.299845903 | 4.064037695 | 5.0529428   |
| 5.330216922 | 5.01693208  | 4.356566122 |
| 5.456309375 | 5.2376914   | 5.689399688 |
| 6.805971808 | 5.799001329 | 6.651714259 |
| 4.673417944 | 4.485491987 | 4.922107524 |
| 4.984278854 | 5.058584983 | 4.661543148 |
| 4.108890257 | 4.652125713 | 5.263617755 |
| 5.336412106 | 4.30750843  | 4.721486566 |
| 6.047323686 | 5.404780284 | 5.747964385 |
| 5.184207186 | 4.049011335 | 4.494387458 |
| 4.322396621 | 4.433196316 | 5.952716962 |
| 4.371636214 | 4.253938084 | 4.396048718 |
| 4.090990529 | 4.084691953 | 4.502068457 |
| 5.346796711 | 4.902454102 | 4.923655948 |
| 5.56753938  | 4.337572716 | 5.486147983 |
| 5.343488928 | 5.050927287 | 4.547634296 |
| 4.145890822 | 5.951979962 | 4.957488503 |
| 5.799174169 | 4.328404032 | 5.599179301 |
| 4.589402683 | 5.303389482 | 4.277624015 |
| 4.648041793 | 5.408294477 | 6.020533135 |
| 4.618921865 | 4.719739596 | 5.443007071 |
| 5.899897992 | 4.900220906 | 4.111215727 |
| 4.033402526 | 4.985758703 | 4.628840525 |
| 4.521680015 | 4.423652878 | 4.994611556 |
| 4.775851256 | 5.857049001 | 6.201392351 |
| 4.23970361  | 4.755313044 | 4.404544649 |
| 5.128863654 | 4.723162676 | 4.909044221 |
| 5.303172797 | 5.110179108 | 4.605982622 |
| 4.839389213 | 4.020339779 | 4.858992617 |
| 5.953032035 | 4.3255875   | 4.684506223 |
| 4.281863377 | 5.587137175 | 5.867772912 |
| 4.482401296 | 4.293385149 | 5.123552237 |
| 4.279651587 | 5.592128456 | 5.723785623 |
| 7.634015222 | 4.97551384  | 4.748246411 |
| 4.864430466 | 5.073798317 | 7.865490978 |
| 4.92390914  | 4.942184645 | 4.665484628 |
| 4.054135977 | 4.992333367 | 5.054156567 |
| 7.050531992 | 4.209962088 | 4.389252562 |
| 4.92114194  | 4.058257015 | 6.113632248 |
| 5.367633249 | 4.917111911 | 4.880953972 |
| 4.294851709 | 4.115874065 | 5.029244508 |
| 4.251024389 | 4.131264819 | 4.459660819 |

|             |             |             |
|-------------|-------------|-------------|
| 4.019981373 | 4.056153252 | 5.152985423 |
| 4.371543879 | 4.429785044 | 4.987913186 |
| 5.381064165 | 4.914702206 | 5.323555879 |
| 4.296236739 | 4.337096343 | 4.886830345 |
| 5.398589452 | 4.173513873 | 5.286017369 |
| 5.108381521 | 4.015888024 | 4.285884886 |
| 6.028624904 | 6.678946046 | 5.253181619 |
| 6.5741398   | 7.462086075 | 5.738258445 |
| 4.860858603 | 4.767898679 | 4.180730159 |
| 4.93903112  | 5.428636204 | 5.577367805 |
| 4.870700441 | 5.172239091 | 4.369195117 |
| 4.137213049 | 4.218571881 | 5.048721242 |
| 4.309923118 | 4.781224038 | 4.183119669 |
| 4.145918481 | 4.840313621 | 4.339245452 |
| 4.122174834 | 4.035681478 | 4.183271524 |
| 5.483889666 | 4.135704449 | 4.429874787 |
| 4.482931989 | 4.722848582 | 5.047183025 |
| 4.241807622 | 4.751996966 | 4.314977387 |
| 5.795530076 | 6.388868785 | 6.408703215 |
| 5.043571694 | 4.370179409 | 4.099842924 |
| 8.170449614 | 8.247631346 | 5.930120049 |
| 4.454718268 | 5.58575878  | 5.538631671 |
| 6.267339934 | 4.717879984 | 6.171424859 |
| 5.97291837  | 4.091444063 | 4.709262132 |
| 4.422370188 | 5.008781693 | 4.919735437 |
| 4.441164072 | 4.013545328 | 4.837756382 |
| 4.664556191 | 4.114598151 | 5.638140148 |
| 4.027318208 | 5.239368598 | 4.353099209 |
| 4.061282905 | 5.529743017 | 4.314536265 |
| 5.472647498 | 4.16973011  | 4.947254093 |
| 4.03799502  | 4.69508872  | 4.312909433 |
| 4.958290757 | 4.019640745 | 4.505283335 |
| 4.279241639 | 5.015417002 | 4.017888282 |
| 5.056013223 | 4.472417683 | 5.159914424 |
| 4.857170547 | 4.19468659  | 5.397238353 |
| 5.425525906 | 5.261235336 | 4.057932819 |
| 5.209142401 | 4.660343478 | 4.9118576   |
| 4.576839632 | 4.105697845 | 4.645213198 |
| 5.313436298 | 4.128794349 | 5.613474576 |
| 5.069481327 | 4.646495766 | 5.416406006 |
| 4.228851874 | 4.887344822 | 6.221630532 |
| 5.378430753 | 4.811338315 | 6.864277069 |
| 5.347265613 | 5.222790072 | 4.045422276 |
| 4.152591886 | 5.287460939 | 4.683552821 |
| 4.660652073 | 4.181856623 | 5.408876162 |
| 6.71819617  | 5.664053996 | 5.940861552 |

|             |             |             |
|-------------|-------------|-------------|
| 4.037486806 | 4.635322341 | 5.181792621 |
| 4.52801706  | 4.630027928 | 4.489792218 |
| 7.59601757  | 4.794687428 | 4.73474533  |
| 4.822693699 | 4.253222118 | 5.686310602 |
| 4.381979559 | 4.52539332  | 4.26017232  |
| 4.381708619 | 4.08969843  | 4.799729557 |
| 5.590227586 | 4.491935268 | 5.653731629 |
| 5.200236649 | 4.15830551  | 4.648031876 |
| 5.116432634 | 4.627694542 | 5.405716044 |
| 4.908447228 | 5.142794225 | 5.880288171 |
| 5.140798556 | 4.147481038 | 4.643208712 |
| 5.124009604 | 5.246831142 | 4.089059684 |
| 5.149074333 | 5.340704999 | 4.123462319 |
| 5.129766357 | 5.944336813 | 4.060165167 |
| 4.153574278 | 4.609391679 | 4.954945287 |
| 6.618303693 | 4.69927397  | 5.530103596 |
| 4.691014582 | 4.770082386 | 4.810863972 |
| 5.477893102 | 4.170053197 | 6.021408954 |
| 4.113648127 | 4.141559184 | 4.843139445 |
| 5.378708214 | 3.981359312 | 5.372073906 |
| 5.974840929 | 5.531151055 | 5.694889121 |
| 5.201381775 | 4.105291631 | 4.562704297 |
| 4.585645042 | 5.339573344 | 5.105371773 |
| 6.231465477 | 4.34478253  | 5.737316553 |
| 5.645620623 | 5.410722115 | 5.145814908 |
| 6.06957987  | 4.908656412 | 5.307563833 |
| 4.798511369 | 4.581572467 | 4.126913384 |
| 4.570561124 | 4.170730545 | 4.209957079 |
| 5.079000271 | 5.831467478 | 4.444319254 |
| 5.641980593 | 4.076263519 | 4.868586505 |
| 4.786534025 | 4.553517675 | 4.6454214   |
| 5.298517411 | 4.631276462 | 4.975178157 |
| 4.581298907 | 4.105630448 | 4.268745544 |
| 5.054299058 | 4.350852072 | 4.102933162 |
| 4.864269727 | 4.668735367 | 5.061867516 |
| 4.221274884 | 4.620949974 | 5.421628939 |
| 5.449354101 | 4.830899664 | 5.44266539  |
| 4.567447441 | 4.860812646 | 4.799084143 |
| 4.649583651 | 4.847908364 | 5.852262526 |
| 5.106163792 | 4.359709135 | 5.009497195 |
| 3.984308466 | 4.17905999  | 4.840474188 |
| 4.18566643  | 5.392740116 | 4.399864168 |
| 6.784687675 | 6.788176136 | 4.212092717 |
| 5.27954135  | 5.404601208 | 6.060074948 |
| 4.219119718 | 4.848909988 | 4.806425329 |
| 4.689394593 | 4.997979234 | 4.894247995 |



|             |             |             |
|-------------|-------------|-------------|
| 4.072166954 | 4.516910616 | 4.207116122 |
| 4.934559615 | 4.772480954 | 4.800813152 |
| 5.21317142  | 4.990965924 | 4.795999999 |
| 5.233232993 | 4.339261787 | 4.403972148 |
| 5.055624208 | 4.15383607  | 4.884810992 |
| 5.480524107 | 4.621207616 | 6.263379762 |
| 4.950895473 | 5.189914494 | 4.932944803 |
| 4.008278556 | 5.422550797 | 5.171239318 |
| 5.392982325 | 4.383241109 | 5.777401708 |
| 5.044534228 | 4.986917475 | 5.791579423 |
| 5.011099955 | 4.385113942 | 4.813894562 |
| 6.228670509 | 4.219626582 | 5.836004329 |
| 5.09202097  | 4.033611107 | 4.663246172 |
| 4.35873486  | 4.063099051 | 4.800728667 |
| 4.201267168 | 5.015698342 | 5.0256357   |
| 6.199742627 | 5.128709694 | 5.758963397 |
| 4.610490841 | 4.515200944 | 4.942981236 |
| 4.026913746 | 4.584431633 | 4.670857534 |
| 5.160163198 | 4.19669136  | 4.588546638 |
| 4.968286894 | 4.557404262 | 4.088467903 |
| 5.011680297 | 4.831496601 | 4.869114601 |
| 4.376941283 | 4.042425329 | 4.424151087 |
| 5.848570114 | 4.0618748   | 4.093911639 |
| 5.094440396 | 4.694512397 | 4.247714728 |
| 4.471999074 | 4.727464446 | 4.518191883 |
| 4.290188197 | 3.975886166 | 4.786807569 |
| 5.600227486 | 4.040879988 | 4.546182566 |
| 4.518424297 | 4.209237405 | 4.004986759 |
| 4.943662782 | 4.215219975 | 4.980396792 |
| 4.564996842 | 4.280017263 | 4.077022071 |
| 4.976188213 | 4.020042484 | 4.323737211 |
| 5.303090223 | 4.253514187 | 5.261561223 |
| 6.008520614 | 4.046910041 | 6.173715702 |
| 5.376432556 | 4.104001999 | 4.584576609 |
| 4.519217425 | 4.448651016 | 4.06087962  |
| 6.319295022 | 7.398189759 | 5.96595317  |
| 4.447713085 | 4.153436774 | 4.870814864 |
| 6.451264024 | 4.733679592 | 4.755685153 |
| 6.312181888 | 4.386486717 | 4.171638267 |
| 4.751899642 | 5.07025144  | 4.489601745 |
| 4.864338422 | 3.99659919  | 4.674033019 |
| 4.765029936 | 4.601594622 | 5.533206648 |
| 5.300001321 | 5.384495042 | 6.392452709 |
| 5.702869543 | 4.057517821 | 5.916683089 |
| 7.46764329  | 7.558134782 | 4.715431558 |
| 3.998137358 | 4.419104271 | 4.199192225 |

|             |             |             |
|-------------|-------------|-------------|
| 4.46607319  | 4.109381945 | 4.298498407 |
| 5.611862631 | 3.953320408 | 4.721733437 |
| 4.423962095 | 4.030997756 | 4.009293836 |
| 5.070863128 | 4.656555639 | 4.426773102 |
| 4.658160126 | 5.069156711 | 4.012588771 |
| 4.414114333 | 4.358993389 | 4.525007663 |
| 5.418484049 | 4.228542208 | 5.292493076 |
| 5.979953982 | 4.144766917 | 5.301217246 |
| 6.012353108 | 4.008277828 | 6.033325892 |
| 4.306503367 | 4.774697372 | 4.723139166 |
| 5.474582957 | 4.970920786 | 5.316877037 |
| 4.688465615 | 4.73043624  | 3.968072022 |
| 4.877623265 | 4.703454991 | 4.140150299 |
| 5.491962733 | 4.772404982 | 4.936466656 |
| 4.429705315 | 4.157062125 | 4.429026509 |
| 5.615797182 | 5.322107468 | 4.949930979 |
| 4.191676329 | 4.517124717 | 4.182770183 |
| 5.251630813 | 4.703995282 | 3.989161596 |
| 4.774253636 | 4.004728609 | 5.065606931 |
| 5.485241639 | 4.909566093 | 3.999840694 |
| 4.50205038  | 5.613955184 | 7.27311081  |
| 5.496962526 | 4.486399608 | 4.869900179 |
| 4.853355477 | 4.530452936 | 5.513538452 |
| 4.998608497 | 4.626027221 | 4.055093834 |
| 4.951943253 | 3.949480779 | 4.696509341 |
| 4.947138481 | 4.083243998 | 5.325361545 |
| 6.116396699 | 6.545366438 | 5.084913946 |
| 5.20215573  | 4.023785804 | 5.787784777 |
| 5.484080263 | 4.357779241 | 4.616466402 |
| 5.165974038 | 4.418255464 | 4.302910062 |
| 5.797840394 | 5.706521806 | 5.758576595 |
| 4.819079408 | 4.601873954 | 4.685031165 |
| 4.122725407 | 4.570348717 | 6.609980143 |
| 4.359331993 | 3.999214795 | 4.599553714 |
| 4.859229527 | 4.68060139  | 4.246687009 |
| 4.751875073 | 4.295160297 | 4.217787557 |
| 4.824542534 | 4.353389482 | 4.730269719 |
| 4.234022674 | 5.084036491 | 6.950092557 |
| 4.707624923 | 4.100090497 | 5.998620477 |
| 5.466955995 | 4.31927169  | 5.446539416 |
| 4.685496924 | 4.221839708 | 5.246080957 |
| 5.269741959 | 6.151727125 | 5.61895171  |
| 7.079741741 | 6.439845453 | 6.237534398 |
| 4.591264447 | 4.135022058 | 4.662370465 |
| 4.841873967 | 5.901479711 | 6.103888084 |
| 4.338736691 | 4.018215181 | 4.415021759 |

|             |             |             |
|-------------|-------------|-------------|
| 4.929591303 | 5.073663588 | 5.810813725 |
| 5.294496193 | 4.097813408 | 4.277618441 |
| 4.932314087 | 4.519443082 | 4.216217074 |
| 4.291340151 | 4.421296756 | 4.627782446 |
| 4.731159924 | 4.568859605 | 4.756956945 |
| 4.316366014 | 4.733222149 | 4.25615846  |
| 5.291953686 | 5.282110341 | 3.93294315  |
| 4.337251944 | 4.468734564 | 3.941006824 |
| 3.978471126 | 5.646891762 | 4.663916001 |
| 4.747717442 | 4.241641939 | 5.194856473 |
| 5.146376656 | 4.577783706 | 5.07056229  |
| 4.026888911 | 3.953461772 | 4.302533614 |
| 4.727217958 | 4.618280331 | 3.996548154 |
| 5.0636503   | 4.030580564 | 5.075204488 |
| 4.71656     | 5.424233774 | 4.130248157 |
| 5.900396265 | 4.771015889 | 5.197067045 |
| 6.083243964 | 4.317088765 | 5.187308855 |
| 4.24121923  | 4.564407741 | 3.932608899 |
| 5.046143329 | 4.643545231 | 5.46755355  |
| 4.619704351 | 4.516620942 | 4.590885555 |
| 4.986241126 | 5.034382298 | 5.07784808  |
| 5.001906314 | 4.311283465 | 4.753110162 |
| 5.866847991 | 5.010821493 | 6.396698998 |
| 5.60485235  | 4.058009882 | 4.710661081 |
| 4.078010856 | 4.181320649 | 4.794890387 |
| 5.352704556 | 6.048338528 | 6.353161266 |
| 5.001796288 | 4.705104354 | 4.230186976 |
| 5.196969587 | 4.093849593 | 4.877853918 |
| 6.038398962 | 6.366724385 | 4.629261427 |
| 5.069655164 | 5.902259477 | 7.034565937 |
| 5.181475207 | 5.000484777 | 4.035796037 |
| 4.611767801 | 4.034572647 | 4.22275971  |
| 4.281571373 | 4.450304035 | 4.720068066 |
| 5.073837064 | 5.358871335 | 4.087952904 |
| 4.941534305 | 4.794263307 | 4.525215815 |
| 5.050249594 | 4.033780305 | 5.823668279 |
| 7.056891176 | 4.844594169 | 4.408884392 |
| 5.411235543 | 4.637807752 | 4.77689861  |
| 5.871345445 | 5.367242039 | 4.172601348 |
| 4.396581911 | 3.924300193 | 4.046852166 |
| 6.062504031 | 4.528690098 | 4.800390618 |
| 5.366025281 | 5.780556416 | 5.396743002 |
| 4.847983523 | 3.952413986 | 5.659546662 |
| 4.640418435 | 4.196581208 | 4.530403991 |
| 3.924481677 | 4.457952195 | 4.584486856 |
| 5.240597845 | 4.583778427 | 4.119010623 |

|             |             |             |
|-------------|-------------|-------------|
| 4.962564191 | 5.141894538 | 4.809134991 |
| 3.949027259 | 4.574818884 | 4.116553514 |
| 5.565711262 | 4.337138835 | 3.944120806 |
| 5.083819943 | 4.735040648 | 4.096024863 |
| 5.231091877 | 3.949941623 | 5.631286378 |
| 4.467603903 | 4.103522459 | 4.246956891 |
| 4.909703277 | 4.032008756 | 5.10140671  |
| 4.709646203 | 4.846318219 | 5.190093578 |
| 4.292281198 | 4.629807575 | 5.761132512 |
| 4.645368449 | 5.395991696 | 3.987941394 |
| 5.713558502 | 4.156012118 | 4.736252285 |
| 4.402228132 | 4.080912235 | 4.167122742 |
| 4.057023406 | 7.921719724 | 7.986623877 |
| 5.261898479 | 4.01081389  | 5.513788018 |
| 5.019740643 | 4.494201712 | 7.029270134 |
| 6.201035072 | 6.641452813 | 6.007493012 |
| 5.013868818 | 4.387329694 | 5.023079505 |
| 4.239797152 | 4.477404709 | 4.240196494 |
| 4.268116834 | 4.099787951 | 4.00316755  |
| 4.691710771 | 4.39911798  | 4.747139114 |
| 5.350183249 | 4.01297592  | 4.224308644 |
| 4.220477594 | 4.48863663  | 4.855759424 |
| 6.963378754 | 6.340656558 | 4.153806212 |
| 5.54142494  | 4.1355351   | 4.275305426 |
| 4.166732784 | 4.191368225 | 4.473204603 |
| 4.379046788 | 4.631167017 | 4.168740286 |
| 6.871987143 | 7.293618413 | 5.871105834 |
| 4.927584165 | 4.013323632 | 4.113356669 |
| 4.305439041 | 6.940472321 | 7.876958951 |
| 4.130182498 | 4.027373668 | 4.115947139 |
| 4.73427827  | 4.099479859 | 4.778051392 |
| 4.163297601 | 4.043213013 | 4.219240341 |
| 4.532639245 | 4.318907095 | 5.04595631  |
| 4.639680886 | 4.083132581 | 3.973953768 |
| 4.715484775 | 3.977318725 | 5.699375538 |
| 5.24161942  | 4.894262315 | 4.497927278 |
| 4.414716101 | 4.017705668 | 4.465089153 |
| 5.625682679 | 4.426107829 | 5.438316591 |
| 4.9766384   | 3.97522201  | 5.187302989 |
| 5.310259843 | 4.050893405 | 4.719132082 |
| 5.191571487 | 4.442003672 | 4.441583159 |
| 4.19780814  | 4.041436508 | 4.004174106 |
| 5.25621101  | 5.058450117 | 4.673750129 |
| 5.402614783 | 5.043260581 | 5.077000444 |
| 6.641410871 | 4.711595683 | 6.177589224 |
| 4.45019845  | 4.372223248 | 4.006314098 |

|             |             |             |
|-------------|-------------|-------------|
| 5.255690933 | 4.687886728 | 5.060933644 |
| 6.022059834 | 4.919047398 | 5.688239408 |
| 4.241416271 | 3.969156444 | 4.679683447 |
| 4.614156347 | 4.817126927 | 4.238350925 |
| 4.49094872  | 3.992935028 | 4.755757564 |
| 4.119746725 | 5.317827606 | 4.83142491  |
| 3.912701332 | 4.06136466  | 4.227326541 |
| 5.319810666 | 4.167034616 | 4.78880385  |
| 4.517427797 | 3.972570133 | 4.133331675 |
| 4.305431436 | 4.888576787 | 5.051715883 |
| 4.070295141 | 3.93828258  | 4.587792377 |
| 5.365412097 | 4.608568054 | 4.800221914 |
| 3.954732213 | 5.532265777 | 6.265827632 |
| 4.034431937 | 4.467077101 | 4.37218699  |
| 5.459942577 | 4.628465817 | 4.635156764 |
| 4.103348091 | 4.526136943 | 4.504203207 |
| 5.090919096 | 4.681147647 | 5.412569233 |
| 5.418659328 | 4.325442208 | 4.713415401 |
| 4.921365663 | 4.116007692 | 4.8410985   |
| 5.179222869 | 4.28723714  | 4.702580343 |
| 5.575019863 | 5.698967598 | 5.08298847  |
| 5.025054014 | 4.635370411 | 4.510078193 |
| 4.925039223 | 3.896070949 | 4.813887678 |
| 3.955340423 | 6.812898262 | 5.165094199 |
| 5.017497019 | 4.384156775 | 3.963173991 |
| 3.956626026 | 3.973966951 | 5.65327439  |
| 7.001157973 | 5.39374755  | 3.99349884  |
| 6.444802683 | 3.883972638 | 5.137494307 |
| 6.150806829 | 5.310188554 | 3.940306993 |
| 4.357055572 | 4.46555797  | 4.177388492 |
| 4.94378063  | 3.928262998 | 4.197144311 |
| 4.656578684 | 3.961339928 | 4.607063669 |
| 5.791469109 | 4.790724651 | 3.971277334 |
| 4.582065085 | 5.171544567 | 4.563481549 |
| 3.925464876 | 6.648862488 | 7.175814001 |
| 4.543358369 | 4.073833947 | 4.116308379 |
| 4.08881862  | 4.464168543 | 4.518696065 |
| 5.421411299 | 4.574348564 | 6.016030854 |
| 5.738346288 | 5.546499494 | 5.074679336 |
| 5.092161844 | 5.008686656 | 4.172252369 |
| 5.496043995 | 4.675953177 | 4.972095951 |
| 4.437565528 | 4.229183008 | 4.723342454 |
| 4.520899322 | 3.969797577 | 5.128434612 |
| 6.906381646 | 5.284803228 | 5.755963364 |
| 5.616855522 | 4.717262254 | 4.920853837 |
| 3.974594312 | 4.726272971 | 4.419970461 |

|             |             |             |
|-------------|-------------|-------------|
| 4.197683491 | 4.72187823  | 5.307703421 |
| 6.291542139 | 5.263846183 | 5.239791812 |
| 4.607724532 | 5.025324025 | 5.329157386 |
| 4.913652486 | 4.105460773 | 4.674161068 |
| 4.067824496 | 4.067709003 | 4.913755782 |
| 5.282635421 | 5.798558491 | 4.001717272 |
| 5.524321449 | 5.163594744 | 5.997010166 |
| 4.756794933 | 4.01185902  | 4.43669563  |
| 4.488042621 | 3.93797833  | 4.425398709 |
| 4.945115757 | 5.212283646 | 4.759085818 |
| 4.752523432 | 5.868202907 | 5.348940549 |
| 4.210450391 | 4.815241277 | 4.054510501 |
| 4.702427073 | 3.929676309 | 5.966044539 |
| 5.139419558 | 5.272821435 | 5.091001478 |
| 4.671073848 | 4.3361651   | 4.565578733 |
| 4.992219954 | 4.052074621 | 4.504943469 |
| 4.372631055 | 4.185151824 | 4.096383194 |
| 3.968611957 | 4.460336414 | 4.134722894 |
| 4.864113703 | 4.964239864 | 3.998469635 |
| 4.049049616 | 4.406993723 | 4.231062885 |
| 4.770527214 | 4.296832097 | 4.173397006 |
| 4.395846193 | 4.065973201 | 4.795367327 |
| 4.70154367  | 4.394149286 | 4.546950272 |
| 5.72494052  | 4.299555717 | 4.111479928 |
| 5.606648072 | 3.97351252  | 5.087457361 |
| 4.65914401  | 4.331593959 | 4.480019451 |
| 4.766234176 | 5.068108753 | 4.917166341 |
| 4.14056685  | 4.135184569 | 3.992727326 |
| 4.681494104 | 4.284953662 | 3.966915644 |
| 3.939774414 | 4.461805754 | 5.131146488 |
| 4.544738994 | 3.96866831  | 4.893004981 |
| 5.950136486 | 3.870632103 | 5.271124228 |
| 5.723813704 | 5.273646801 | 5.326740471 |
| 5.416209426 | 5.674000904 | 5.767024314 |
| 4.71842083  | 4.764019246 | 4.033393985 |
| 6.006019854 | 5.345260173 | 4.234980903 |
| 4.831573572 | 4.000445956 | 4.397035912 |
| 5.210644482 | 4.389894481 | 5.73230802  |
| 7.072043266 | 6.895183342 | 6.661861872 |
| 4.382814791 | 4.087963334 | 4.567060578 |
| 5.014765355 | 7.332003605 | 6.828936628 |
| 5.635175747 | 5.022813805 | 4.434021597 |
| 4.1031355   | 4.467317663 | 4.902070579 |
| 4.738503778 | 4.340453549 | 4.706316724 |
| 5.543804341 | 4.013236963 | 4.940298724 |
| 6.682394608 | 4.000202173 | 5.673187133 |

|             |             |             |
|-------------|-------------|-------------|
| 4.89928902  | 3.944020703 | 4.122454898 |
| 5.36839871  | 5.545212656 | 5.40807678  |
| 5.638117818 | 5.068143394 | 5.857626263 |
| 4.235460124 | 4.030529215 | 4.602510148 |
| 4.894697412 | 4.639499521 | 4.452215511 |
| 4.884285423 | 4.137185581 | 4.055858398 |
| 4.373532983 | 5.159172295 | 6.877162306 |
| 4.099347325 | 4.0233016   | 4.941197626 |
| 4.795137472 | 4.481150012 | 5.062256044 |
| 5.40157748  | 5.670042147 | 4.741188048 |
| 4.390337654 | 4.768922138 | 3.977247454 |
| 4.405022666 | 4.429285243 | 4.785349613 |
| 4.778707385 | 3.894559935 | 4.551410568 |
| 3.905411574 | 4.549221506 | 4.880843041 |
| 5.400035031 | 4.128785133 | 4.840392651 |
| 3.946006605 | 5.089485878 | 4.645631601 |
| 7.053608918 | 4.794582716 | 4.944201913 |
| 3.937704607 | 4.740881651 | 4.995348671 |
| 5.360680011 | 4.10585402  | 4.685016775 |
| 5.65288539  | 5.143325556 | 3.87547844  |
| 4.372417787 | 5.087080004 | 4.702958439 |
| 7.118435212 | 5.502813279 | 6.651742652 |
| 4.168224684 | 4.943645806 | 4.834983508 |
| 3.958747411 | 3.846142941 | 4.091476379 |
| 5.329082299 | 4.004971109 | 4.504020903 |
| 3.907921478 | 3.885265843 | 4.398696361 |
| 4.521838938 | 3.929538293 | 4.837939976 |
| 5.422536509 | 4.100656422 | 3.939578235 |
| 5.434377251 | 4.372633169 | 5.291152654 |
| 5.531509876 | 5.10500004  | 6.276706782 |
| 5.359730343 | 4.913601466 | 5.25168052  |
| 4.560967029 | 4.482473714 | 4.478977228 |
| 4.890074179 | 4.015904843 | 4.24741499  |
| 4.00717501  | 4.140402132 | 4.521713159 |
| 5.166123476 | 4.677455453 | 3.926344931 |
| 5.367607719 | 4.495612469 | 4.226699184 |
| 4.397509631 | 4.53928462  | 4.598846754 |
| 4.312837293 | 4.523844054 | 3.863822185 |
| 7.165729212 | 5.505171322 | 3.855894381 |
| 3.950274979 | 3.90288637  | 4.628827852 |
| 3.96584212  | 3.894982829 | 4.951042921 |
| 4.915755503 | 4.800408208 | 4.264650264 |
| 4.725033544 | 4.316730245 | 4.311235819 |
| 6.576666198 | 4.767500106 | 4.993197188 |
| 4.861542406 | 5.186764407 | 4.981775613 |
| 4.666786011 | 3.892567167 | 4.636089134 |

|             |             |             |
|-------------|-------------|-------------|
| 4.349414542 | 3.955758952 | 4.464703508 |
| 6.457111115 | 4.787759221 | 4.211576806 |
| 3.933423626 | 4.33757953  | 4.608456021 |
| 5.006020345 | 3.934171095 | 4.091314075 |
| 4.897336855 | 4.417564729 | 5.202710023 |
| 5.232320689 | 4.064893229 | 4.608822405 |
| 3.949891088 | 3.846400215 | 4.063794737 |
| 3.925317891 | 5.163056437 | 5.700112515 |
| 4.72358875  | 4.16069921  | 5.092411499 |
| 4.462025182 | 4.384232482 | 4.395107594 |
| 4.099331799 | 4.407488775 | 3.98428026  |
| 3.886599488 | 4.363468347 | 4.057065232 |
| 5.022024587 | 4.419999051 | 5.844437405 |
| 5.394060884 | 3.860459941 | 5.180573492 |
| 4.865782816 | 3.997944879 | 4.900329693 |
| 4.512158178 | 5.331800651 | 4.767528815 |
| 3.849693524 | 4.172762448 | 4.594572903 |
| 5.445715251 | 4.567877859 | 5.287332541 |
| 5.81488101  | 5.198798457 | 5.073812801 |
| 5.066997002 | 3.871031249 | 4.694067443 |
| 5.331063417 | 4.317020803 | 5.124395391 |
| 4.491894279 | 4.670070345 | 4.56870396  |
| 4.89126087  | 5.157790267 | 5.069171728 |
| 4.843077572 | 4.372672775 | 4.667435903 |
| 4.478368715 | 4.192503169 | 4.194519001 |
| 5.070468156 | 3.888791025 | 4.75260698  |
| 3.843389051 | 4.16875577  | 4.441261447 |
| 5.447382466 | 4.838833035 | 4.236393106 |
| 4.818904844 | 4.076212253 | 5.632129526 |
| 3.868278974 | 4.017947476 | 4.334802467 |
| 4.705966783 | 5.290449594 | 4.193055959 |
| 4.164724933 | 4.423619347 | 4.010186642 |
| 4.453457234 | 3.896759988 | 4.30016943  |
| 5.132767412 | 5.104170473 | 3.837721098 |
| 4.224058045 | 4.504236544 | 5.641835438 |
| 5.266729005 | 3.866470722 | 6.092727248 |
| 3.900970897 | 4.114274305 | 4.45480334  |
| 5.852843713 | 4.179483408 | 4.883510734 |
| 4.942175112 | 4.951484559 | 5.266215499 |
| 5.376104293 | 4.047183391 | 4.419989132 |
| 4.725557598 | 5.846470084 | 4.448533086 |
| 3.870286483 | 4.166516665 | 4.993408838 |
| 4.025410969 | 3.852313513 | 4.394521565 |
| 4.925902472 | 4.343673856 | 5.089403269 |
| 6.428480498 | 5.568967656 | 3.875256664 |
| 5.184269529 | 3.978116128 | 6.399592523 |



|             |             |             |
|-------------|-------------|-------------|
| 6.036806216 | 4.097568286 | 3.883768801 |
| 5.044192438 | 4.157119096 | 4.569177617 |
| 4.413813598 | 4.862619098 | 5.231718468 |
| 4.320104283 | 4.33390786  | 4.464298016 |
| 4.112748067 | 4.127912653 | 4.525577402 |
| 4.690712798 | 4.632551314 | 4.255803949 |
| 4.422673146 | 4.140105781 | 4.096990304 |
| 4.299550174 | 4.452103593 | 4.275019658 |
| 4.839343117 | 4.624482093 | 3.90189274  |
| 4.632842186 | 4.061987444 | 4.644999715 |
| 4.609987083 | 4.203266677 | 4.575160736 |
| 4.526611123 | 6.43016138  | 6.72421338  |
| 5.429131833 | 3.87143854  | 4.552790184 |
| 4.453816241 | 4.116098511 | 4.622269257 |
| 4.571860837 | 4.584311398 | 4.514959384 |
| 4.448292683 | 4.079002557 | 3.932426893 |
| 5.962423966 | 5.207325159 | 5.445456804 |
| 5.196207902 | 3.847512635 | 5.178228808 |
| 4.222508657 | 3.977225145 | 4.340619006 |
| 4.766670832 | 6.79595125  | 6.739569961 |
| 5.089235339 | 3.962563742 | 4.44438549  |
| 5.916408903 | 4.16227149  | 3.907981593 |
| 4.926831174 | 4.05266344  | 5.011008968 |
| 6.197903116 | 5.490702479 | 5.644301725 |
| 4.302617971 | 5.046134219 | 4.954994234 |
| 4.152826046 | 3.839364963 | 4.638988717 |
| 4.764105188 | 4.605568945 | 4.570832487 |
| 4.971704468 | 6.613648624 | 5.657765248 |
| 5.084746068 | 4.366932872 | 5.998306173 |
| 4.5334859   | 5.698503731 | 5.412858802 |
| 5.373425874 | 4.576035793 | 3.936868023 |
| 4.82954508  | 4.703783128 | 3.885522201 |
| 5.181118607 | 4.631851399 | 4.874898073 |
| 6.047880991 | 4.522115194 | 4.393085023 |
| 5.348543894 | 5.577512532 | 5.403888723 |
| 4.698821936 | 4.174653566 | 3.934572765 |
| 6.046371946 | 4.242472341 | 6.009183884 |
| 5.284590583 | 3.961889601 | 6.232524284 |
| 4.985356505 | 4.590162707 | 4.529226247 |
| 4.456108835 | 4.662103965 | 5.295502271 |
| 5.964863614 | 4.561934255 | 5.153230696 |
| 5.029960816 | 5.228546686 | 5.127023742 |
| 3.943618821 | 5.522787386 | 6.704913446 |
| 4.741890728 | 4.602408761 | 3.998297225 |
| 6.168462695 | 4.892161647 | 4.79388308  |
| 5.087817362 | 3.942383859 | 4.698250529 |

|             |             |             |
|-------------|-------------|-------------|
| 4.262624982 | 4.854381362 | 6.247412279 |
| 4.640436857 | 3.960415069 | 4.79645591  |
| 5.767064485 | 4.128691183 | 4.455478925 |
| 4.070769074 | 4.189594128 | 4.515029206 |
| 4.163210427 | 4.739704049 | 4.100714608 |
| 5.564768105 | 6.846762631 | 6.271272926 |
| 5.166932321 | 4.080628359 | 3.847624241 |
| 5.216538436 | 3.882600882 | 4.345104949 |
| 4.317615986 | 4.139243417 | 4.557917564 |
| 5.29835674  | 4.133460298 | 4.188460566 |
| 3.882221449 | 4.75526292  | 4.083178847 |
| 4.120000178 | 4.221250328 | 4.084755341 |
| 4.731572146 | 4.618815645 | 5.092658115 |
| 4.681086879 | 4.575208112 | 4.336624864 |
| 5.496925357 | 4.155238349 | 4.243526022 |
| 4.068619292 | 3.990777426 | 5.962539293 |
| 5.144674922 | 4.164459409 | 4.407174395 |
| 5.605859273 | 7.356565688 | 6.627758353 |
| 5.280192322 | 4.765537372 | 4.43760722  |
| 5.361358887 | 3.840242328 | 5.636732035 |
| 4.873029408 | 4.453537065 | 4.510538314 |
| 5.095126325 | 3.847111118 | 3.967855892 |
| 5.157885271 | 3.877150365 | 4.269184818 |
| 3.865582398 | 4.619547288 | 4.434971011 |
| 5.317153603 | 4.384617805 | 4.000159247 |
| 6.022758181 | 4.823114184 | 5.411762453 |
| 3.857554829 | 4.137902577 | 4.42332883  |
| 5.095569986 | 4.593622618 | 4.66182001  |
| 4.944592613 | 4.807478866 | 4.442156537 |
| 5.28314159  | 4.423765667 | 4.955558754 |
| 4.245135665 | 5.319573756 | 4.98277207  |
| 4.371888069 | 4.355199764 | 4.469434096 |
| 5.293141453 | 3.928698316 | 5.415182492 |
| 5.414505905 | 5.410149381 | 5.39172831  |
| 5.709813955 | 3.917522408 | 4.429204003 |
| 4.701664747 | 3.915687995 | 5.780954332 |
| 3.975864251 | 4.094305199 | 4.431490837 |
| 4.755253085 | 4.132652716 | 5.164704431 |
| 5.509729701 | 3.861218789 | 4.7800767   |
| 4.75871504  | 3.996749921 | 4.627375756 |
| 4.68471077  | 5.517911594 | 3.948644993 |
| 4.399436613 | 3.917038945 | 4.14166883  |
| 5.026464346 | 3.96329523  | 4.855470429 |
| 4.062256974 | 4.564313587 | 4.720491925 |
| 4.850140122 | 5.047477343 | 4.144296741 |
| 4.759538318 | 4.499408102 | 4.024965348 |

|             |             |             |
|-------------|-------------|-------------|
| 4.054852902 | 4.260663196 | 4.232544364 |
| 5.14883789  | 5.276188514 | 4.519875271 |
| 4.670125358 | 4.856825231 | 4.104521219 |
| 4.881892674 | 4.465262134 | 4.785140884 |
| 4.911862373 | 3.810771942 | 5.308710856 |
| 4.844760251 | 4.950198871 | 3.820999794 |
| 4.066891682 | 4.728680043 | 4.10485179  |
| 4.77260198  | 5.431557419 | 4.147517812 |
| 4.235678689 | 3.884110211 | 4.618575072 |
| 4.515165873 | 3.809538509 | 4.679819192 |
| 4.054625034 | 3.906629992 | 6.290640591 |
| 5.479334889 | 6.063835824 | 6.934385618 |
| 5.264983721 | 5.067366147 | 5.07811485  |
| 5.082187    | 4.461438248 | 4.537293243 |
| 5.252150063 | 5.540194233 | 5.489627926 |
| 3.942536805 | 4.943689183 | 4.95037131  |
| 5.254630899 | 4.355241398 | 3.965256978 |
| 5.015478247 | 4.572715544 | 4.980893942 |
| 4.59440404  | 4.331309738 | 4.64631766  |
| 4.112787254 | 4.785988545 | 3.788626798 |
| 4.474875038 | 3.885950823 | 4.290990529 |
| 3.935512105 | 4.234535126 | 4.772208668 |
| 4.534454669 | 4.547607852 | 4.167344681 |
| 4.416989348 | 4.226109856 | 4.317325372 |
| 4.916175731 | 4.503751914 | 4.390572749 |
| 5.231898378 | 4.836075379 | 4.015141649 |
| 4.668450057 | 4.365591726 | 4.680104009 |
| 5.399784791 | 5.394478498 | 4.942829649 |
| 4.23656399  | 4.149719545 | 4.34986467  |
| 4.393273231 | 3.912010695 | 4.730388223 |
| 5.414454246 | 4.274265592 | 5.205099898 |
| 4.383077703 | 3.830031079 | 4.526561136 |
| 5.160197903 | 4.631408974 | 4.603863196 |
| 5.945900783 | 5.170203511 | 5.778172715 |
| 4.262282974 | 3.960355401 | 4.651359142 |
| 5.476372402 | 4.161038368 | 5.136768538 |
| 5.4285358   | 4.726036808 | 5.611896029 |
| 4.523601908 | 4.112504609 | 4.766641222 |
| 4.997584351 | 4.00116625  | 5.536689501 |
| 3.88359509  | 4.245106646 | 4.381607627 |
| 4.618105393 | 3.934886828 | 4.046441945 |
| 3.854852015 | 4.524272392 | 4.737242222 |
| 3.799182692 | 4.029438159 | 4.752701434 |
| 4.363177739 | 4.394190432 | 4.627542566 |
| 4.660771989 | 3.946960445 | 4.439837657 |
| 4.563104843 | 4.123455068 | 4.322532779 |

|             |             |             |
|-------------|-------------|-------------|
| 4.485821348 | 4.47109582  | 4.568230743 |
| 7.199945508 | 7.084941897 | 6.158754999 |
| 6.022045728 | 3.890938369 | 4.867066964 |
| 3.856141964 | 4.199484005 | 4.630905598 |
| 7.066008413 | 3.859571184 | 4.594904568 |
| 5.928388974 | 3.798849928 | 5.219299846 |
| 4.158016328 | 4.886800648 | 4.98508426  |
| 4.598149913 | 4.77565617  | 5.380141576 |
| 5.253360948 | 4.665907585 | 4.378139692 |
| 4.410853043 | 3.85974933  | 3.952372909 |
| 5.128425086 | 4.993218744 | 5.424422506 |
| 4.553896843 | 4.631039035 | 4.856422063 |
| 6.35002419  | 3.969595003 | 5.31528296  |
| 4.099802851 | 4.6217307   | 4.965669106 |
| 5.796297347 | 4.649015471 | 4.008704266 |
| 4.330445162 | 4.266324033 | 4.707630511 |
| 5.168705393 | 3.818996348 | 5.44461256  |
| 4.226368075 | 4.158192269 | 4.059552877 |
| 3.865994373 | 6.612898673 | 6.64157434  |
| 5.20524641  | 3.806171945 | 6.989974327 |
| 6.327181098 | 3.805354224 | 5.326254629 |
| 5.211011675 | 3.81844955  | 5.594871594 |
| 5.32887243  | 5.829323625 | 5.025687674 |
| 5.902983314 | 3.868114247 | 5.028525431 |
| 3.916931659 | 4.315080079 | 4.151364766 |
| 4.718565335 | 4.212541431 | 4.182863834 |
| 4.680087909 | 3.994844442 | 5.633316237 |
| 4.777442727 | 5.279240465 | 4.610607071 |
| 4.620237841 | 4.496008102 | 4.13961217  |
| 4.269960147 | 3.800119588 | 4.143847978 |
| 5.385669717 | 4.446754213 | 5.119754315 |
| 5.174608803 | 3.891731926 | 5.028664495 |
| 4.096735882 | 4.941781384 | 4.559389978 |
| 4.101956729 | 4.474869873 | 5.727023634 |
| 4.446368746 | 3.893883256 | 5.131661957 |
| 4.178978519 | 3.832487241 | 3.937735821 |
| 5.557314932 | 3.91287414  | 6.341950293 |
| 5.587477354 | 4.297300407 | 4.812971214 |
| 7.460437596 | 5.466458595 | 5.11974988  |
| 4.436248373 | 3.811528466 | 4.370270202 |
| 4.397847343 | 4.043652885 | 4.502887435 |
| 4.27200256  | 4.062980657 | 3.84955433  |
| 6.37572405  | 4.88303402  | 5.817044204 |
| 4.924564414 | 4.183683351 | 4.858706952 |
| 3.839584754 | 4.861551708 | 4.699509067 |
| 4.7852112   | 5.32173209  | 3.823781933 |

|             |             |             |
|-------------|-------------|-------------|
| 5.17275232  | 4.089193536 | 4.328034765 |
| 4.447228308 | 4.436504138 | 5.069655106 |
| 4.548218984 | 4.715165247 | 4.26667344  |
| 4.01067094  | 4.63577014  | 4.754429035 |
| 4.356584922 | 4.210897823 | 3.978895713 |
| 5.168898161 | 4.88876289  | 5.973442926 |
| 4.249047264 | 3.902623807 | 4.369667625 |
| 5.983349592 | 5.377529288 | 4.268583228 |
| 5.795524274 | 3.916726965 | 7.556913254 |
| 4.948197913 | 4.169135073 | 4.82342879  |
| 3.894140008 | 3.888711685 | 5.090199743 |
| 5.215696513 | 4.028296567 | 4.081623969 |
| 6.506404529 | 3.798595369 | 4.825613279 |
| 5.105743808 | 4.813564432 | 5.740946872 |
| 5.783925932 | 3.804897905 | 5.663498584 |
| 5.214142414 | 5.013261587 | 5.425747022 |
| 3.99669829  | 5.496273577 | 4.641642127 |
| 5.813554834 | 5.442635341 | 6.155618352 |
| 5.084489001 | 4.164387756 | 3.852716735 |
| 4.781342288 | 5.14435499  | 4.643332978 |
| 5.211872041 | 4.808230845 | 4.181332532 |
| 5.242999122 | 4.449997448 | 4.757473038 |
| 6.158027781 | 4.312734518 | 6.536530127 |
| 4.128278965 | 4.493458099 | 4.963967619 |
| 4.834221589 | 4.27426263  | 5.464755374 |
| 5.282144885 | 5.060196508 | 3.919548727 |
| 3.820902133 | 4.159792465 | 4.079041241 |
| 4.704093871 | 3.999974388 | 4.14752037  |
| 3.872791063 | 4.340542906 | 4.154848854 |
| 5.522681409 | 4.865053965 | 5.175288111 |
| 5.059332135 | 6.127543613 | 6.210949582 |
| 3.99149445  | 4.833152436 | 5.136813963 |
| 3.738020441 | 5.610135352 | 6.615299396 |
| 4.399985495 | 3.825545349 | 5.070622509 |
| 4.30987986  | 4.266146462 | 4.562342557 |
| 4.522784038 | 4.343305919 | 4.231212482 |
| 3.916459329 | 4.431214824 | 3.934932375 |
| 4.810924799 | 4.422193919 | 4.501172887 |
| 3.958352714 | 5.306421883 | 4.473907365 |
| 5.110496017 | 3.855727922 | 5.143772579 |
| 3.776208215 | 4.179973751 | 4.652961411 |
| 3.916801883 | 4.61305011  | 4.017585166 |
| 6.005292904 | 3.923095311 | 4.085357407 |
| 5.824806772 | 5.465394459 | 4.004053793 |
| 4.332359947 | 3.76026269  | 3.896213521 |
| 6.858129087 | 4.533042102 | 4.333251104 |

|             |             |             |
|-------------|-------------|-------------|
| 5.466788698 | 4.470522225 | 4.107644987 |
| 6.283775322 | 5.101792969 | 4.940674858 |
| 4.521609628 | 4.541850246 | 4.355050054 |
| 3.904703569 | 3.892650254 | 4.438115439 |
| 4.69334391  | 3.928113356 | 5.015554047 |
| 6.6921705   | 6.028970365 | 6.86276964  |
| 5.105704123 | 3.93653194  | 4.242455343 |
| 5.249797382 | 4.911991769 | 5.057285559 |
| 4.41544523  | 3.772989036 | 4.607661907 |
| 6.10158662  | 3.753658784 | 5.804477513 |
| 3.919761473 | 4.586072818 | 3.881136585 |
| 4.799099934 | 3.884415173 | 4.033958283 |
| 4.746506009 | 3.796373894 | 4.012702855 |
| 4.760954105 | 4.262389176 | 4.238762981 |
| 3.771563672 | 4.497850876 | 4.270464718 |
| 7.247163203 | 6.001930429 | 6.434583835 |
| 4.259361709 | 4.326754921 | 8.888379499 |
| 4.325956805 | 4.31871774  | 4.604981663 |
| 4.268506668 | 3.732208567 | 4.218197403 |
| 5.087891648 | 4.421089074 | 4.853697283 |
| 4.530816785 | 4.421648492 | 4.587728238 |
| 4.234002186 | 3.879086594 | 4.277630938 |
| 4.987276866 | 4.716782233 | 3.81836794  |
| 4.635082974 | 4.271448206 | 3.77893476  |
| 4.356610099 | 4.148226153 | 4.84574692  |
| 4.519425727 | 3.839591394 | 3.975660996 |
| 5.257961555 | 5.14803591  | 4.646265308 |
| 4.863733787 | 4.96043862  | 5.023684695 |
| 5.225931516 | 5.854006809 | 5.687126728 |
| 3.842068057 | 4.314303295 | 4.6899664   |
| 7.851503987 | 4.04667734  | 5.228961136 |
| 4.985165627 | 5.775912141 | 5.444181904 |
| 4.222181006 | 4.951129326 | 4.870209722 |
| 4.560436743 | 4.72699938  | 4.01628537  |
| 4.755436377 | 6.104304422 | 3.90178897  |
| 4.239129826 | 3.981788865 | 4.421574917 |
| 4.479870405 | 4.198320717 | 4.344628882 |
| 6.487471939 | 5.350037107 | 4.871495437 |
| 4.552596652 | 4.441698786 | 5.763325057 |
| 3.926077922 | 4.514767119 | 4.462722776 |
| 4.80752043  | 3.810619746 | 4.320543732 |
| 5.706566227 | 3.748597901 | 4.829615818 |
| 5.909534962 | 4.866795223 | 5.150779852 |
| 4.510031135 | 5.08788987  | 4.878634939 |
| 5.002445144 | 4.700769665 | 4.206572101 |
| 4.402889983 | 4.092591686 | 3.81141465  |

|             |             |             |
|-------------|-------------|-------------|
| 4.328938724 | 3.893088741 | 4.459516036 |
| 4.233757109 | 3.770159714 | 4.453933875 |
| 5.042183025 | 4.359411583 | 4.522292583 |
| 4.839684891 | 3.856680329 | 5.551088528 |
| 5.684095636 | 7.06863029  | 6.508012656 |
| 4.941208439 | 3.882271105 | 5.345340948 |
| 4.863081253 | 4.115167172 | 5.209255138 |
| 4.653538887 | 4.057746645 | 4.399076626 |
| 5.476638703 | 4.046092864 | 4.707131358 |
| 3.856228153 | 4.518953009 | 5.735718456 |
| 4.959981749 | 3.822003332 | 5.164440373 |
| 4.351642585 | 4.089558769 | 3.866614    |
| 5.613044984 | 3.987667934 | 5.17010842  |
| 4.168524089 | 4.726648128 | 4.015510643 |
| 5.303823807 | 3.972032592 | 4.608794279 |
| 4.896193707 | 3.830315124 | 4.978361384 |
| 4.274936171 | 4.461551585 | 4.078337817 |
| 4.484852161 | 4.251160883 | 3.920477146 |
| 4.420052109 | 3.857800899 | 4.859679584 |
| 3.723230413 | 5.695013522 | 5.080623075 |
| 5.294804215 | 5.575535575 | 4.791367917 |
| 4.847629363 | 4.393229871 | 3.875658822 |
| 4.160914757 | 4.253917062 | 4.64998589  |
| 5.221966599 | 4.679416086 | 4.44029553  |
| 5.324044736 | 4.761966293 | 4.74017988  |
| 4.225866524 | 4.270506206 | 5.059081743 |
| 3.933080676 | 3.930078887 | 5.395841511 |
| 4.589298743 | 5.135589256 | 3.759107604 |
| 4.769583127 | 4.09894176  | 3.773130165 |
| 5.239282697 | 3.722971362 | 4.281078408 |
| 3.881821539 | 4.341424216 | 3.925255188 |
| 4.025601401 | 4.009653739 | 5.078958047 |
| 4.3624001   | 4.310960766 | 4.340009007 |
| 4.935623456 | 3.823544692 | 4.443577116 |
| 5.134970744 | 3.927348044 | 4.911510898 |
| 3.780720462 | 3.736788436 | 3.796239854 |
| 4.631927982 | 4.880771401 | 5.482222135 |
| 3.758549388 | 4.184786854 | 4.620395951 |
| 5.345100147 | 4.20595593  | 4.017833856 |
| 5.493432663 | 4.799895589 | 5.318294366 |
| 4.839563142 | 4.816667967 | 5.444545642 |
| 4.590631454 | 4.070004559 | 4.66151672  |
| 5.318005233 | 6.919931351 | 6.263602738 |
| 4.259057057 | 4.060433709 | 3.768126241 |
| 4.04025359  | 4.687757312 | 5.839256554 |
| 4.043329521 | 4.334374803 | 4.840580033 |

|             |             |             |
|-------------|-------------|-------------|
| 4.651971015 | 4.273578149 | 4.312333916 |
| 4.526255618 | 4.533364601 | 3.803062857 |
| 6.30453209  | 5.271282891 | 6.248367232 |
| 4.870370072 | 3.733703498 | 4.214408732 |
| 4.031778977 | 3.768864346 | 4.140934804 |
| 3.81643114  | 8.166520374 | 8.087800733 |
| 5.30616039  | 5.018611431 | 4.86798755  |
| 4.725704208 | 4.076660216 | 5.00668624  |
| 4.19535784  | 3.764857448 | 5.212374647 |
| 4.959182243 | 4.272145425 | 4.068905238 |
| 5.299130923 | 3.800887115 | 5.075436606 |
| 7.360222304 | 4.380611474 | 5.671343619 |
| 4.624213586 | 3.746903605 | 4.863601383 |
| 4.016576144 | 4.046271941 | 4.592688405 |
| 4.670204609 | 4.450908929 | 3.76728292  |
| 4.786505937 | 4.44327797  | 4.747851793 |
| 4.159155603 | 4.591039662 | 4.571033798 |
| 4.601999645 | 3.851300663 | 4.033572155 |
| 3.753082079 | 3.948028806 | 3.805674162 |
| 4.211658682 | 4.342437349 | 3.692769398 |
| 5.686715981 | 3.698699777 | 5.222811194 |
| 4.428815575 | 3.89297975  | 4.930175255 |
| 6.031663093 | 4.356824436 | 5.008529005 |
| 5.2529368   | 5.081885149 | 4.269095934 |
| 4.89702349  | 3.749380494 | 4.702690226 |
| 4.908566462 | 4.35438159  | 5.12549815  |
| 4.435547098 | 4.499567898 | 4.137025371 |
| 4.734617454 | 3.756424167 | 5.831981962 |
| 5.014029769 | 3.767408726 | 5.317803856 |
| 4.272553917 | 4.014378157 | 4.707427498 |
| 4.912645759 | 3.790061308 | 4.520128928 |
| 4.16506614  | 4.002339182 | 3.860899585 |
| 4.951446787 | 4.767936486 | 3.864282013 |
| 4.232526087 | 4.916030532 | 4.331427344 |
| 5.973331521 | 3.702036452 | 4.728506392 |
| 4.194156121 | 3.97677361  | 5.061605461 |
| 4.967684811 | 4.017622522 | 4.994389685 |
| 5.211209203 | 4.353465361 | 3.691570306 |
| 4.425620024 | 4.187535439 | 4.325892405 |
| 3.865601417 | 3.855176261 | 3.902940437 |
| 4.303028365 | 5.125346024 | 5.043709691 |
| 4.565659625 | 4.735191246 | 4.944444103 |
| 4.022907873 | 5.472883131 | 4.731634182 |
| 3.74806981  | 3.744835441 | 4.27909003  |
| 5.209284846 | 4.483836346 | 3.952198368 |
| 4.708388032 | 4.007617407 | 5.411400361 |



|             |             |             |
|-------------|-------------|-------------|
| 4.451874536 | 4.131929865 | 4.158942946 |
| 4.77910556  | 4.184123678 | 4.58126121  |
| 5.801796124 | 4.676768172 | 4.521457537 |
| 4.626376571 | 4.535153994 | 4.276029553 |
| 4.843211014 | 4.090691463 | 4.492097479 |
| 4.429086613 | 3.894527403 | 3.855066862 |
| 4.10824136  | 3.820683305 | 4.179205124 |
| 4.368024727 | 4.040432905 | 4.124141681 |
| 4.333733987 | 3.718103016 | 4.080658209 |
| 5.57898268  | 4.289761947 | 3.995593437 |
| 4.259206519 | 4.047776705 | 4.46862696  |
| 5.564822805 | 5.100901368 | 5.908924116 |
| 4.702487201 | 3.856757927 | 4.458450668 |
| 5.592515499 | 5.759514092 | 6.509810727 |
| 4.120747358 | 3.90373291  | 4.568458079 |
| 4.477642946 | 3.695751372 | 4.949548766 |
| 5.411016283 | 4.603539797 | 5.180335706 |
| 4.642749935 | 3.775225102 | 3.917854571 |
| 4.980932876 | 3.810744138 | 4.886487959 |
| 4.003064961 | 3.784900685 | 5.104144072 |
| 4.599732512 | 3.748677443 | 4.517211096 |
| 3.873204599 | 3.896981673 | 3.89085597  |
| 5.376822924 | 4.884409227 | 3.83923426  |
| 3.952339314 | 3.811539287 | 3.909576755 |
| 5.485578309 | 5.165816194 | 4.474079252 |
| 4.81753258  | 3.811023932 | 5.248330882 |
| 4.68199778  | 4.353837658 | 4.251699027 |
| 4.694615772 | 4.53786974  | 3.849822704 |
| 4.60636141  | 7.149612027 | 7.150531907 |
| 5.382793451 | 5.034330917 | 4.377896977 |
| 4.29782375  | 3.97543935  | 4.88998523  |
| 4.877099871 | 3.794201218 | 4.512042403 |
| 6.608469568 | 5.179948538 | 5.330156625 |
| 5.125659513 | 5.196469396 | 5.175582458 |
| 4.099501358 | 4.312504163 | 4.051036679 |
| 3.915156274 | 4.924062983 | 4.330814599 |
| 3.980921169 | 3.780908989 | 3.988655888 |
| 4.649740763 | 3.678120999 | 4.671265809 |
| 4.242853507 | 4.946251036 | 3.74693517  |
| 5.90590372  | 5.800121292 | 5.633885246 |
| 5.885374697 | 5.291361735 | 5.623232144 |
| 3.730395782 | 5.146546474 | 4.799710607 |
| 4.805156131 | 4.889788903 | 5.657058731 |
| 3.786950449 | 3.670542966 | 5.594180138 |
| 4.19857217  | 3.745008899 | 3.760453053 |
| 4.843517892 | 3.779951365 | 4.683551159 |

|             |             |             |
|-------------|-------------|-------------|
| 4.53951102  | 4.125501698 | 4.566453696 |
| 6.811960176 | 5.083303889 | 6.16837502  |
| 4.912397855 | 4.257902154 | 5.22935558  |
| 5.411195058 | 5.771070742 | 5.597666639 |
| 4.807325917 | 3.795638126 | 4.108408048 |
| 4.133902986 | 3.971552026 | 3.849682253 |
| 4.62326885  | 5.343647754 | 5.427264067 |
| 5.670384457 | 5.113539215 | 5.494979507 |
| 4.784265772 | 4.665524079 | 4.698053778 |
| 4.314564854 | 5.623209194 | 4.4502473   |
| 5.700903037 | 4.785118597 | 5.783948627 |
| 4.30559693  | 3.720969168 | 3.950851787 |
| 5.308879337 | 5.719319303 | 7.214229892 |
| 4.345841394 | 4.93335299  | 4.698366631 |
| 4.259129168 | 5.922187728 | 5.467081144 |
| 4.867326477 | 3.695479251 | 4.490903452 |
| 5.084840467 | 5.172309497 | 5.126187106 |
| 5.121704068 | 4.258293835 | 4.893032303 |
| 4.353328979 | 4.088404002 | 4.006964446 |
| 4.710173416 | 3.877693157 | 4.518364663 |
| 5.11997954  | 4.906372713 | 4.107220728 |
| 4.616914089 | 3.816649125 | 4.018286421 |
| 5.735223139 | 4.254009583 | 4.740829627 |
| 4.389111056 | 4.568307408 | 4.3665914   |
| 4.969878589 | 4.013598155 | 4.212825564 |
| 4.723183673 | 3.662830698 | 4.599626714 |
| 4.353348068 | 4.621028123 | 3.859647035 |
| 7.135076773 | 3.686069647 | 5.15602116  |
| 4.989454716 | 4.11369887  | 3.877828931 |
| 4.109222901 | 4.113403199 | 4.824992544 |
| 4.42630825  | 3.91757596  | 3.805971142 |
| 4.826318961 | 4.418482608 | 4.959973554 |
| 4.503644704 | 4.336202557 | 4.083528491 |
| 3.818526234 | 3.750398105 | 3.759362027 |
| 5.552061758 | 3.645093552 | 4.975775572 |
| 4.348391812 | 4.578505899 | 3.861560735 |
| 4.347885382 | 6.359006603 | 6.234935808 |
| 5.530964989 | 3.685938543 | 5.573630862 |
| 3.706055378 | 4.269365775 | 3.798362649 |
| 5.323879816 | 5.350050339 | 4.863514403 |
| 4.86653744  | 3.785358549 | 4.526727928 |
| 4.841122995 | 4.352136478 | 3.860432267 |
| 4.983984558 | 3.976926315 | 3.820836655 |
| 6.04463984  | 3.77554178  | 5.428961216 |
| 5.413978606 | 5.299086346 | 4.593769229 |
| 5.002455717 | 3.672759108 | 4.182648501 |

|             |             |             |
|-------------|-------------|-------------|
| 5.35842151  | 5.252838653 | 5.756824991 |
| 6.050785273 | 5.659333128 | 3.808247821 |
| 4.586401811 | 4.425448619 | 4.336987514 |
| 4.898139908 | 3.746257594 | 4.222824901 |
| 3.669512642 | 4.914353379 | 4.274351682 |
| 6.058160033 | 4.307711153 | 3.749233118 |
| 4.453399626 | 3.740106214 | 4.300960758 |
| 5.304516496 | 4.138288573 | 4.025496952 |
| 4.179890066 | 4.928438794 | 4.360515822 |
| 4.748661892 | 3.705615151 | 4.270545695 |
| 4.833675743 | 4.451954014 | 4.976167535 |
| 4.526265003 | 3.693469038 | 4.292042713 |
| 3.975057154 | 3.721675007 | 4.422831264 |
| 5.43123377  | 3.708782456 | 4.814636093 |
| 4.540732596 | 3.84939195  | 3.934305052 |
| 5.053967575 | 4.84233269  | 5.6150016   |
| 4.568901872 | 4.605207331 | 4.527106388 |
| 5.629191255 | 4.281179517 | 6.076409249 |
| 4.588692608 | 4.306129875 | 4.25629834  |
| 5.201502291 | 3.793862037 | 4.223349649 |
| 6.716385427 | 4.821439795 | 6.202739728 |
| 7.127443381 | 3.720286399 | 4.428076593 |
| 3.963930701 | 3.870578163 | 4.5402861   |
| 3.725022316 | 6.013147072 | 4.075584178 |
| 4.549486328 | 4.927950073 | 5.293125413 |
| 3.771005137 | 4.575619168 | 4.509470387 |
| 4.291751859 | 3.698695154 | 4.576951004 |
| 4.537719788 | 3.902056657 | 4.627371863 |
| 5.058156091 | 4.261710686 | 4.873925864 |
| 5.04692693  | 3.997063541 | 3.715337891 |
| 4.344362704 | 4.025724416 | 3.727019234 |
| 3.836238292 | 6.116245293 | 8.46637117  |
| 5.248253118 | 5.300859573 | 6.175290567 |
| 4.029300672 | 3.755042011 | 5.47931863  |
| 3.959541333 | 4.285575961 | 3.965601541 |
| 4.737865478 | 3.941870265 | 4.552108978 |
| 5.535939315 | 4.10180652  | 4.02564312  |
| 4.732182129 | 4.799785775 | 4.775800713 |
| 4.814476541 | 5.06820143  | 4.780765327 |
| 4.442424686 | 4.137662973 | 4.922913716 |
| 5.104465536 | 4.131715959 | 5.331996772 |
| 4.280970022 | 3.752532294 | 4.405055282 |
| 4.069069709 | 4.885268507 | 4.38235738  |
| 6.043436659 | 4.766998631 | 6.23203616  |
| 3.645395944 | 5.381400791 | 6.203359222 |
| 4.580936042 | 4.289366652 | 4.352488818 |

|             |             |             |
|-------------|-------------|-------------|
| 4.72780622  | 5.010465342 | 4.089976635 |
| 3.744344783 | 4.072580294 | 4.216069645 |
| 5.230463974 | 3.994707583 | 4.871704358 |
| 4.804128842 | 4.300237735 | 5.088654173 |
| 5.440937325 | 4.735855025 | 4.807308746 |
| 4.254945993 | 4.695367754 | 5.415969648 |
| 5.47866438  | 3.838729604 | 5.425678734 |
| 5.596122919 | 3.647166572 | 7.661861311 |
| 5.127261754 | 3.81788294  | 4.958391507 |
| 4.869772282 | 3.713430207 | 4.617439205 |
| 5.148765583 | 4.919545072 | 4.563676458 |
| 5.048061488 | 4.79162387  | 4.808409    |
| 4.299403509 | 4.273337915 | 4.056092913 |
| 5.160119971 | 4.292253829 | 3.91496397  |
| 5.166723377 | 4.946965643 | 4.54730147  |
| 4.205522151 | 3.627628453 | 5.058325302 |
| 3.676320123 | 4.063268177 | 4.044621359 |
| 4.067926635 | 3.853721873 | 4.709746839 |
| 4.186313599 | 3.759975099 | 5.106927414 |
| 4.191481055 | 3.985837567 | 4.18392931  |
| 5.649220666 | 4.076128421 | 5.606966442 |
| 5.135484035 | 4.749637754 | 5.155524853 |
| 4.349159811 | 3.83424413  | 3.918474454 |
| 4.010205854 | 4.572050776 | 4.464285796 |
| 3.988483313 | 4.276831602 | 5.31559704  |
| 3.803083793 | 3.893681268 | 4.007560229 |
| 4.222785297 | 4.870912552 | 4.443342535 |
| 4.49988836  | 4.229725617 | 3.618987217 |
| 3.672718803 | 5.418907666 | 4.798451653 |
| 5.350022074 | 4.198531996 | 3.921151652 |
| 3.891940044 | 3.675283504 | 3.86652184  |
| 4.272902171 | 4.012791119 | 5.283824802 |
| 4.161228321 | 3.735740385 | 5.975118684 |
| 4.574591436 | 4.64931516  | 4.282969946 |
| 5.093617619 | 4.371095937 | 4.852394993 |
| 5.071126509 | 3.629350706 | 4.678749327 |
| 4.442387385 | 3.713923255 | 3.871726665 |
| 4.109939115 | 3.646440856 | 5.036627783 |
| 4.644734544 | 3.753343318 | 4.381805354 |
| 4.748085083 | 4.429185908 | 4.636578458 |
| 3.791759227 | 4.908034751 | 6.625941945 |
| 3.776562489 | 4.00324176  | 5.753922749 |
| 5.85190409  | 4.265968899 | 3.720407283 |
| 5.382679302 | 3.646446517 | 6.737632394 |
| 4.381253711 | 3.770720816 | 3.98985042  |
| 5.511037487 | 4.190502088 | 4.951090529 |

|             |             |             |
|-------------|-------------|-------------|
| 4.476640629 | 4.123682905 | 3.810151101 |
| 4.371285984 | 4.584284427 | 4.097268584 |
| 4.319037174 | 4.181143564 | 3.723277682 |
| 4.25823476  | 4.240940332 | 4.180250684 |
| 5.396805779 | 4.524663648 | 4.459527737 |
| 5.673244732 | 5.907324265 | 6.383183045 |
| 5.070574    | 4.285823985 | 5.09227794  |
| 4.362600748 | 4.446119109 | 4.601183192 |
| 5.076356986 | 4.551757666 | 6.325174275 |
| 4.376593845 | 4.333079249 | 4.32425992  |
| 5.044958827 | 4.625455257 | 3.722727403 |
| 3.644461859 | 4.71175804  | 5.632619347 |
| 5.622380457 | 3.66485324  | 5.121758715 |
| 4.144731098 | 4.829852726 | 3.613068251 |
| 5.468405144 | 4.763829758 | 4.977972273 |
| 3.648380318 | 4.545873096 | 4.176528861 |
| 4.523007263 | 4.025089682 | 4.687794205 |
| 4.357955582 | 3.605518461 | 4.663321244 |
| 4.633096647 | 4.409380197 | 4.374805986 |
| 5.001189599 | 4.458523768 | 4.680948233 |
| 4.819109217 | 4.645057234 | 3.735059867 |
| 4.572671891 | 4.34277696  | 3.736198497 |
| 4.809797995 | 4.649396984 | 4.619873772 |
| 3.797766252 | 4.576369583 | 4.697631396 |
| 4.591634737 | 5.005871022 | 3.757257217 |
| 4.487521024 | 4.499751525 | 3.681500207 |
| 4.386433564 | 4.214967752 | 4.112867904 |
| 4.254727085 | 3.666991302 | 5.339113766 |
| 4.718555785 | 3.718359921 | 5.165838013 |
| 4.455185411 | 5.038972631 | 4.321911572 |
| 4.695466889 | 3.677831708 | 4.618412685 |
| 3.893555843 | 4.008272929 | 4.172108118 |
| 4.426642148 | 5.085521823 | 4.420426195 |
| 5.471379129 | 4.635611815 | 3.703619178 |
| 4.250055138 | 4.34445679  | 4.263161963 |
| 4.381262793 | 4.402120984 | 4.804509423 |
| 4.439800596 | 4.039103065 | 3.820057767 |
| 4.50916857  | 4.162984665 | 3.720442638 |
| 4.950603892 | 3.866848831 | 3.649238012 |
| 3.820833586 | 3.653489926 | 3.995301959 |
| 5.077455242 | 4.405379731 | 3.735061505 |
| 4.550786857 | 3.583540385 | 4.385525813 |
| 3.898424399 | 3.613896061 | 3.845680111 |
| 6.004396886 | 4.859445878 | 5.57623726  |
| 5.16338776  | 5.152931935 | 4.883250588 |
| 5.893693069 | 4.1057543   | 4.79421513  |

|             |             |             |
|-------------|-------------|-------------|
| 4.382399024 | 4.454801089 | 5.260144663 |
| 4.805941462 | 3.638021978 | 4.597176703 |
| 5.54683026  | 4.354982926 | 6.015689958 |
| 4.59407124  | 3.953319721 | 4.093863975 |
| 4.712081835 | 4.717052065 | 4.794373509 |
| 5.033977638 | 4.756146881 | 4.80649681  |
| 4.506868145 | 3.93023726  | 4.441958741 |
| 4.770489888 | 4.374814341 | 4.582881879 |
| 3.594014917 | 4.071171967 | 3.790149164 |
| 4.920275628 | 4.377737454 | 4.736361027 |
| 5.425877547 | 4.411824309 | 3.650317307 |
| 4.046260775 | 4.03809358  | 4.682729043 |
| 5.656286782 | 3.623634412 | 7.337559489 |
| 5.514999141 | 5.024330414 | 6.039323202 |
| 5.101853672 | 3.723742094 | 3.875791704 |
| 4.177402857 | 3.953351851 | 4.344549132 |
| 6.797850622 | 5.2103881   | 5.193476301 |
| 5.542309845 | 4.42998802  | 3.65502649  |
| 5.502849094 | 4.151214057 | 4.868903146 |
| 5.191076294 | 5.118215015 | 5.469691813 |
| 4.134643464 | 3.663473503 | 4.980296039 |
| 4.703071325 | 3.578553514 | 4.72041405  |
| 4.649546765 | 5.210860319 | 4.640110299 |
| 3.943131158 | 3.9788558   | 4.328610262 |
| 3.777371015 | 5.580784455 | 5.914294243 |
| 4.412770918 | 3.564806339 | 4.145314226 |
| 4.417642529 | 3.788974932 | 3.664928821 |
| 4.614860211 | 3.713734881 | 3.791248394 |
| 4.130891256 | 4.108265114 | 4.271167448 |
| 3.899156036 | 4.073427454 | 3.614470549 |
| 7.647754586 | 3.886190528 | 6.002904567 |
| 3.697809812 | 4.673572253 | 5.315248617 |
| 4.584282039 | 5.133863286 | 5.340693571 |
| 5.27909964  | 3.606254339 | 4.942478596 |
| 4.715295291 | 3.699165418 | 3.767979696 |
| 4.882227502 | 3.970628435 | 3.637721244 |
| 5.932563483 | 4.293433053 | 5.210979957 |
| 6.189560756 | 4.824483248 | 3.571017547 |
| 7.228319556 | 5.980820202 | 5.176889744 |
| 5.26385908  | 4.525256335 | 5.639416666 |
| 4.069340325 | 5.277811411 | 4.775688359 |
| 5.492230606 | 3.960348016 | 4.460962383 |
| 4.370174633 | 3.859234439 | 4.408870855 |
| 6.691470163 | 4.274926126 | 5.367469785 |
| 4.00747901  | 4.650559767 | 4.436922249 |
| 5.412677603 | 5.557377833 | 5.00184556  |

|             |             |             |
|-------------|-------------|-------------|
| 4.535609228 | 4.766865049 | 4.121967929 |
| 4.23993584  | 3.860412804 | 4.761719143 |
| 4.751289267 | 4.119764088 | 3.873292922 |
| 5.269685578 | 4.26574715  | 5.363792923 |
| 4.877064786 | 4.158447474 | 4.847582753 |
| 5.119824922 | 4.450188304 | 6.117824162 |
| 3.998479424 | 4.246778455 | 3.711786298 |
| 4.197684551 | 4.297984383 | 3.786383051 |
| 3.956822316 | 4.385122575 | 4.476362185 |
| 4.619541366 | 4.167008018 | 3.567272162 |
| 4.412449248 | 3.659219847 | 3.710236064 |
| 4.87941292  | 3.683319459 | 4.268681952 |
| 4.066582235 | 4.715560675 | 4.963836234 |
| 4.489472255 | 4.136929101 | 4.345300936 |
| 4.4109389   | 3.94751554  | 4.709372483 |
| 3.670708547 | 5.459288063 | 4.12912026  |
| 3.780043479 | 3.58754308  | 3.780088468 |
| 4.39375756  | 3.662523881 | 5.229148856 |
| 4.315034285 | 4.250497047 | 4.247625523 |
| 4.404366948 | 3.800810228 | 4.421744639 |
| 3.666594389 | 3.740773039 | 5.945697153 |
| 4.137583738 | 5.087057253 | 3.748576933 |
| 4.883935448 | 3.610999928 | 4.226347233 |
| 4.279753957 | 4.266743244 | 4.224976502 |
| 4.678434976 | 4.026998232 | 3.888967681 |
| 5.266887644 | 3.634808615 | 4.582453528 |
| 4.588194842 | 5.057946156 | 3.853308919 |
| 3.947679622 | 4.785398559 | 4.187235331 |
| 6.143744978 | 7.134493766 | 6.082472136 |
| 5.432860958 | 4.983425614 | 3.865995863 |
| 4.015448607 | 3.846355141 | 3.795422347 |
| 4.162090741 | 3.66130075  | 4.0248932   |
| 3.710747728 | 4.975326094 | 4.449924165 |
| 4.134143226 | 3.771886649 | 4.704662421 |
| 3.844053409 | 5.123811812 | 4.727284721 |
| 4.030774965 | 3.767419535 | 4.337216128 |
| 3.782200472 | 3.803195248 | 5.136801511 |
| 4.072321745 | 4.038758609 | 3.604385954 |
| 4.150506385 | 3.558054404 | 3.863255572 |
| 5.105837757 | 3.934768489 | 4.610043756 |
| 4.217687388 | 3.832088289 | 3.998326599 |
| 5.221391671 | 4.204728052 | 4.635625414 |
| 4.062454515 | 3.678911889 | 3.915577834 |
| 4.05213918  | 3.624690909 | 3.691571683 |
| 4.48877367  | 3.756720278 | 3.901261321 |
| 4.52016565  | 3.718590223 | 7.414188839 |

|             |             |             |
|-------------|-------------|-------------|
| 4.379209622 | 3.845549444 | 4.195690025 |
| 5.024538142 | 3.865229581 | 6.434035271 |
| 5.754070313 | 3.575239666 | 5.063671496 |
| 5.324686452 | 5.379698156 | 3.882401234 |
| 6.600684534 | 4.188917216 | 3.672034115 |
| 4.291656686 | 4.220709119 | 3.892728655 |
| 5.893109571 | 4.698032741 | 3.725582223 |
| 4.267656091 | 4.229868262 | 5.048291216 |
| 5.514044525 | 4.258426372 | 3.745126607 |
| 4.907271148 | 3.691468869 | 4.620373032 |
| 4.744558936 | 3.593808298 | 4.338166676 |
| 5.14161035  | 4.309435243 | 3.586355235 |
| 5.301209691 | 3.701982056 | 4.232511251 |
| 3.55329652  | 4.601989466 | 6.208025038 |
| 4.49517125  | 3.667673274 | 4.449338083 |
| 3.777905925 | 3.924763521 | 3.637700497 |
| 3.890526242 | 5.30607764  | 5.642834496 |
| 5.018597936 | 3.71012439  | 5.467350607 |
| 4.369182544 | 4.345433175 | 5.568873278 |
| 5.4966335   | 4.013507303 | 4.755344813 |
| 5.046511744 | 4.537612818 | 5.458224462 |
| 4.177469665 | 3.733021974 | 4.24995904  |
| 4.194089448 | 3.565138942 | 4.443861972 |
| 4.638125093 | 3.579495795 | 3.860772816 |
| 4.93767649  | 3.76765548  | 5.113446462 |
| 4.801596966 | 4.347688981 | 5.953486515 |
| 4.199695673 | 3.542650097 | 4.740064309 |
| 3.718341986 | 4.770513722 | 3.984421552 |
| 4.464117585 | 4.584448838 | 4.635273252 |
| 4.434248475 | 4.097643572 | 4.642630959 |
| 3.771679307 | 4.021674193 | 3.897055934 |
| 4.322186602 | 3.779687501 | 3.975693894 |
| 5.12764633  | 5.231312497 | 3.602283278 |
| 3.660817015 | 4.175267197 | 5.087992914 |
| 4.46060664  | 4.021528925 | 4.889304303 |
| 4.460994233 | 3.833138185 | 4.872810237 |
| 4.941169643 | 5.180063943 | 4.367564771 |
| 4.256423966 | 3.563076068 | 3.794245388 |
| 3.671300723 | 4.427084942 | 4.475628196 |
| 4.130855029 | 3.801537194 | 4.039663289 |
| 4.949554946 | 4.58342789  | 3.598196534 |
| 4.399039949 | 3.95364842  | 3.902109352 |
| 4.198094235 | 3.584252487 | 4.532185544 |
| 5.7037092   | 5.307160911 | 3.676215915 |
| 4.848024612 | 4.434613226 | 4.328861275 |
| 4.296391943 | 3.517395189 | 3.98764234  |



|             |             |             |
|-------------|-------------|-------------|
| 4.263554854 | 3.640480712 | 4.637476469 |
| 4.257792454 | 3.92376013  | 3.69235096  |
| 4.036229109 | 3.605099976 | 4.747746158 |
| 4.663639795 | 4.098582437 | 4.020657895 |
| 3.531762775 | 3.817686738 | 3.761909131 |
| 4.791234596 | 3.650850681 | 4.744356692 |
| 4.128009401 | 4.240901978 | 3.662434258 |
| 5.869437317 | 5.250825013 | 3.641351272 |
| 4.258510818 | 3.636490052 | 5.013995498 |
| 3.734948699 | 4.240678638 | 4.405586627 |
| 4.590940621 | 4.02766784  | 4.205466759 |
| 4.395914984 | 4.963264845 | 4.556751407 |
| 4.505825662 | 4.097897108 | 5.255615015 |
| 4.598496925 | 3.833097293 | 4.719987722 |
| 4.604760034 | 4.030306212 | 5.293508886 |
| 4.231866348 | 3.585760504 | 3.803542114 |
| 4.093163302 | 4.227024423 | 4.427847851 |
| 5.204084121 | 3.536376759 | 4.758478995 |
| 4.780209242 | 4.571366356 | 4.350339895 |
| 4.376451236 | 5.108063479 | 4.834014309 |
| 4.74107498  | 5.288030871 | 4.104899032 |
| 3.739289269 | 4.959465493 | 5.264119345 |
| 5.251843375 | 4.248384543 | 3.59183136  |
| 4.628847215 | 5.897105805 | 5.913442546 |
| 5.06327342  | 3.897298187 | 5.603377589 |
| 3.996489132 | 3.668049464 | 4.074326138 |
| 4.31132421  | 3.640885277 | 3.70954614  |
| 5.029499568 | 4.449034413 | 4.962371964 |
| 3.826862515 | 3.760469643 | 4.903999091 |
| 5.174720931 | 3.680799562 | 4.216349894 |
| 5.340919812 | 3.561925731 | 4.565139187 |
| 4.575887112 | 4.616893218 | 3.584031063 |
| 4.306182806 | 5.027029344 | 3.951999521 |
| 4.324735195 | 4.506877281 | 5.743021546 |
| 5.184154383 | 4.498036337 | 5.132616178 |
| 4.229948563 | 4.61565954  | 4.514148627 |
| 3.758638766 | 3.830833945 | 3.697225235 |
| 5.857306665 | 4.182884917 | 5.080131532 |
| 4.600711601 | 3.664132505 | 4.739196885 |
| 4.675936915 | 3.740519586 | 4.64596784  |
| 3.675536834 | 5.723529811 | 5.082487771 |
| 4.510383417 | 3.578182638 | 5.018814574 |
| 5.211248842 | 3.734627693 | 4.077571822 |
| 4.659480571 | 4.52845582  | 3.750037769 |
| 5.511554275 | 4.281970092 | 3.737331635 |
| 6.734964767 | 5.516217571 | 6.044389706 |

|             |             |             |
|-------------|-------------|-------------|
| 4.097001409 | 4.997886693 | 3.684734352 |
| 4.479387511 | 3.546333171 | 4.000651241 |
| 3.765803755 | 5.715602627 | 5.89844179  |
| 4.144333842 | 4.793717006 | 3.719176442 |
| 3.492305403 | 4.637999158 | 4.253998019 |
| 5.857780466 | 3.655811183 | 4.332281841 |
| 4.446403734 | 3.739678974 | 3.890429837 |
| 4.871648648 | 3.567313257 | 4.534395039 |
| 4.95199869  | 3.676221987 | 4.657355129 |
| 4.596298037 | 3.599926972 | 4.068510832 |
| 4.748565744 | 3.519380485 | 4.017528032 |
| 3.540085677 | 5.138353837 | 4.549989178 |
| 4.881943555 | 3.731452065 | 4.730898072 |
| 4.732537292 | 3.846525054 | 4.682136691 |
| 5.046574032 | 4.421726135 | 5.062616362 |
| 4.202561921 | 4.384491394 | 4.327712244 |
| 5.579934144 | 3.830378692 | 3.825372367 |
| 4.456485272 | 3.637409989 | 4.433938669 |
| 3.990712735 | 4.107065186 | 4.256360365 |
| 4.35111262  | 4.154748017 | 4.367696783 |
| 5.421958913 | 5.417891456 | 5.124472745 |
| 3.990722505 | 4.215821207 | 4.686468042 |
| 5.992142944 | 5.848110191 | 4.568945611 |
| 4.106513145 | 4.452700235 | 3.539854529 |
| 4.909955813 | 4.336791042 | 4.70632403  |
| 6.082631534 | 5.196757946 | 5.457440513 |
| 3.688146029 | 3.604592535 | 3.536699833 |
| 4.76487368  | 3.546784141 | 4.143957369 |
| 5.900904714 | 4.933678243 | 5.48025433  |
| 4.586371259 | 3.735051207 | 4.898323235 |
| 4.384003834 | 3.866921228 | 4.788235361 |
| 4.176355484 | 3.763323549 | 4.201117649 |
| 4.046021409 | 4.021187005 | 3.960421307 |
| 4.188863961 | 4.138605909 | 4.195102206 |
| 3.515342233 | 4.374949625 | 4.038703209 |
| 3.636087742 | 3.558896075 | 4.079356211 |
| 3.616260774 | 6.019267224 | 4.146960087 |
| 4.1760102   | 4.574167842 | 3.620929271 |
| 4.745867173 | 5.457877539 | 7.145043657 |
| 5.274179791 | 7.428510884 | 6.016247171 |
| 4.279042367 | 3.847123267 | 3.510760952 |
| 3.614583058 | 4.457201684 | 4.263213562 |
| 4.668324353 | 3.956867677 | 4.443729079 |
| 4.454131359 | 3.687952704 | 4.135269363 |
| 4.927384162 | 3.587569519 | 4.177078118 |
| 4.554878723 | 4.086782941 | 3.962666386 |

|             |             |             |
|-------------|-------------|-------------|
| 4.081510684 | 3.945169325 | 3.9741365   |
| 3.888865685 | 4.112984201 | 4.405923803 |
| 6.112743421 | 3.602110963 | 5.331902123 |
| 3.686777227 | 3.674577927 | 5.544560954 |
| 5.003299809 | 5.295621365 | 3.711881495 |
| 3.73429633  | 4.315527822 | 4.704706875 |
| 4.04075731  | 3.790784965 | 4.15051234  |
| 3.689707284 | 4.493838365 | 4.245884269 |
| 3.948066748 | 4.153467657 | 4.191323779 |
| 5.051348082 | 4.832012375 | 5.714797266 |
| 3.69652867  | 3.813432859 | 3.763587348 |
| 6.244079605 | 3.85657447  | 4.709040024 |
| 4.686023582 | 4.806104586 | 3.84774825  |
| 4.562923258 | 4.300996867 | 5.468411412 |
| 4.1040072   | 3.916533602 | 4.277665242 |
| 4.53619059  | 3.823352378 | 4.292409118 |
| 3.569521646 | 5.180924028 | 5.813076383 |
| 4.24422707  | 5.495819091 | 4.816458077 |
| 4.697497203 | 3.831070298 | 4.687859976 |
| 5.378812569 | 3.683799474 | 4.681844827 |
| 4.65722942  | 4.338416255 | 4.09827985  |
| 5.736529633 | 4.280443853 | 6.139380559 |
| 4.118251477 | 4.706737316 | 4.464206485 |
| 4.818372553 | 3.630259485 | 5.136697993 |
| 4.180396114 | 3.738633719 | 3.862614264 |
| 4.308980424 | 3.83631721  | 3.544121985 |
| 4.861868044 | 4.048573728 | 4.964844591 |
| 3.739373145 | 3.864669221 | 4.196611494 |
| 4.040576091 | 6.865533779 | 3.966969257 |
| 5.679429428 | 4.34127022  | 4.225395363 |
| 4.088648448 | 3.977318718 | 4.827620594 |
| 4.962734028 | 4.654279165 | 4.474248276 |
| 4.158231647 | 3.918094156 | 3.980532976 |
| 4.356832511 | 3.483929354 | 3.635735663 |
| 4.247570041 | 3.515102774 | 4.686165706 |
| 5.765997395 | 4.820118232 | 4.718764217 |
| 6.047641499 | 5.357950131 | 5.788349116 |
| 5.611965454 | 4.615087304 | 4.139276249 |
| 4.180591187 | 4.28420963  | 4.271821552 |
| 4.383527255 | 3.602274833 | 3.997139642 |
| 4.487828989 | 3.71550633  | 4.426112486 |
| 3.71510519  | 3.821889991 | 3.946052436 |
| 4.363274326 | 5.911618578 | 5.093085548 |
| 5.786949362 | 3.832716132 | 5.228339153 |
| 4.580629913 | 4.361240895 | 4.659608341 |
| 4.003415109 | 3.886173872 | 3.483060464 |

|             |             |             |
|-------------|-------------|-------------|
| 6.143197342 | 4.172157819 | 3.773134755 |
| 5.484743119 | 3.740432287 | 4.319000855 |
| 5.698931976 | 4.411153553 | 4.413271159 |
| 4.789946352 | 4.956896414 | 3.557801638 |
| 3.900648273 | 4.572402504 | 3.943156442 |
| 5.319232497 | 3.70583957  | 4.302019205 |
| 5.437207277 | 5.74673957  | 3.49104191  |
| 5.507212281 | 4.453887906 | 3.750066409 |
| 4.561990604 | 4.809267784 | 3.865086475 |
| 5.423017092 | 4.114645883 | 4.409954966 |
| 4.566091709 | 4.633668483 | 4.729319252 |
| 5.126879185 | 3.49239953  | 6.184678691 |
| 3.729548534 | 4.522071474 | 4.762530364 |
| 3.678499286 | 4.74417882  | 4.614248059 |
| 3.755442614 | 4.38582274  | 3.512916593 |
| 4.565921828 | 3.840460336 | 4.438910393 |
| 5.757189041 | 9.598883015 | 7.516102368 |
| 4.986676699 | 3.466435676 | 3.898159887 |
| 4.962552154 | 3.705724885 | 5.211958868 |
| 3.968115259 | 5.348737845 | 4.812024778 |
| 4.084436183 | 3.603982464 | 3.788269904 |
| 5.319390496 | 3.483184921 | 4.42993245  |
| 6.140068776 | 3.614655342 | 4.659793078 |
| 5.494604628 | 4.339055655 | 4.72273347  |
| 5.094303565 | 3.498622313 | 4.766946596 |
| 5.32329359  | 3.588192702 | 4.445656569 |
| 3.66083587  | 3.861684021 | 4.280195142 |
| 5.587806411 | 4.419931068 | 4.243332302 |
| 4.062946909 | 3.910326908 | 4.010495125 |
| 5.629592557 | 3.466120619 | 5.383770438 |
| 4.295990833 | 3.485852769 | 3.978359096 |
| 4.272426854 | 4.074978082 | 4.493397795 |
| 3.636739914 | 3.733134938 | 4.332469522 |
| 4.224649743 | 3.877012791 | 3.65319918  |
| 7.920483676 | 4.800024988 | 6.984038292 |
| 4.620682747 | 3.541465971 | 4.469417777 |
| 5.804691054 | 5.251200836 | 4.029970189 |
| 3.835729568 | 3.517399252 | 3.440815914 |
| 4.314115032 | 4.633773543 | 4.182074226 |
| 5.734916474 | 4.038548611 | 5.118008603 |
| 5.272096682 | 5.105215532 | 5.861236644 |
| 4.698655963 | 3.502840674 | 4.141924253 |
| 4.221210023 | 3.557094867 | 4.044263626 |
| 6.354929341 | 4.372280732 | 4.034066535 |
| 3.584014619 | 3.593825022 | 3.975504834 |
| 5.2105053   | 4.014734315 | 4.628286374 |

|             |             |             |
|-------------|-------------|-------------|
| 3.810255099 | 4.229277357 | 4.094000322 |
| 4.243139932 | 5.096745065 | 4.764381265 |
| 6.082841095 | 3.51431328  | 4.311809939 |
| 3.748110968 | 4.605897737 | 3.652895941 |
| 4.382776646 | 3.605030387 | 4.578255066 |
| 4.206692426 | 3.956703863 | 4.235421822 |
| 5.94239388  | 7.401638942 | 7.128364263 |
| 4.459852222 | 3.649336418 | 4.763438218 |
| 6.431681225 | 4.980446487 | 4.18202479  |
| 4.126720264 | 4.928268445 | 4.072495068 |
| 5.257512772 | 3.842559155 | 4.572372995 |
| 5.559878795 | 4.62488451  | 5.474679153 |
| 3.475935045 | 4.09503105  | 3.817903182 |
| 5.413526152 | 3.725800791 | 6.164994476 |
| 3.442757222 | 5.026663448 | 4.719081017 |
| 4.423980569 | 4.00765249  | 4.559243757 |
| 4.386457842 | 3.578914892 | 4.258024667 |
| 4.509132092 | 3.540477444 | 4.130968041 |
| 3.597867595 | 4.037688845 | 4.04517403  |
| 5.410172695 | 4.792940349 | 4.580881559 |
| 4.055522913 | 3.599536561 | 4.134391209 |
| 4.386190983 | 3.55770654  | 5.99181928  |
| 4.32132316  | 3.80841026  | 4.627313652 |
| 5.284120639 | 3.71452638  | 4.677804894 |
| 3.481427604 | 3.709404235 | 3.843573361 |
| 3.927208714 | 3.600096339 | 3.853793819 |
| 4.385692954 | 3.525655534 | 4.193599466 |
| 5.077747193 | 3.475556721 | 4.687597544 |
| 3.562798709 | 3.492423189 | 3.824569733 |
| 4.441803983 | 4.998932175 | 5.232474369 |
| 5.747610168 | 3.486010802 | 4.051015281 |
| 4.127338999 | 3.840677886 | 3.512307359 |
| 3.847780274 | 3.863855603 | 3.868041209 |
| 5.561864726 | 3.43581515  | 4.588654154 |
| 4.167385858 | 3.702711116 | 4.60577843  |
| 3.670989599 | 4.202159831 | 3.879162911 |
| 4.864777274 | 3.703164316 | 4.133941847 |
| 6.261767299 | 3.632510283 | 6.392350325 |
| 3.822173013 | 3.525010884 | 3.941154223 |
| 4.757812571 | 5.474202536 | 4.820789067 |
| 6.840118329 | 4.130970602 | 5.879356489 |
| 3.603290458 | 4.297452121 | 5.751925902 |
| 4.136600138 | 4.091222706 | 4.830501272 |
| 6.836209131 | 3.886090603 | 5.580053319 |
| 3.644948176 | 3.586922949 | 4.193429762 |
| 4.011233562 | 4.162735065 | 4.266087752 |

|             |             |             |
|-------------|-------------|-------------|
| 3.839465328 | 3.583247168 | 3.540769418 |
| 5.682998765 | 4.719692814 | 6.70564236  |
| 5.68394284  | 5.227627324 | 5.303090561 |
| 4.388324737 | 3.918182794 | 4.445121506 |
| 4.216419149 | 4.432398889 | 4.892166183 |
| 4.649653755 | 3.55439172  | 4.877929916 |
| 3.560555465 | 3.4354347   | 4.931263362 |
| 4.951751819 | 5.058271592 | 4.551768618 |
| 3.465933128 | 4.219954371 | 5.296327989 |
| 5.311843198 | 4.873013741 | 5.02029889  |
| 5.770631337 | 4.287868994 | 3.646656523 |
| 4.136259558 | 4.019224685 | 3.441267638 |
| 4.975784595 | 4.483607472 | 4.445851826 |
| 3.812594303 | 4.109132205 | 4.789485562 |
| 5.118636038 | 3.606198967 | 4.782013695 |
| 5.058391651 | 3.567704827 | 5.013967143 |
| 4.581722294 | 4.000159541 | 4.486586009 |
| 4.032867034 | 3.627965748 | 3.616683517 |
| 4.609313898 | 3.942210233 | 3.662540152 |
| 4.106175224 | 3.479181135 | 4.340556942 |
| 4.553388702 | 3.422321195 | 4.132863709 |
| 6.605439    | 3.714733616 | 3.845828319 |
| 3.525750965 | 6.586356783 | 6.327935568 |
| 4.178230256 | 4.028951219 | 4.365800614 |
| 6.784638966 | 4.416380457 | 3.441803279 |
| 4.229076807 | 3.527639213 | 3.832565724 |
| 4.302635502 | 4.539123416 | 4.644652487 |
| 4.447113437 | 4.297879908 | 4.367380315 |
| 3.556716937 | 4.89641379  | 6.010399242 |
| 5.111961771 | 4.774517542 | 5.066998422 |
| 3.599292005 | 3.616637607 | 3.766616533 |
| 5.596015224 | 4.687496846 | 5.183252    |
| 3.683135492 | 3.88626449  | 4.248912496 |
| 4.684402106 | 4.207031289 | 3.699829404 |
| 3.562249433 | 3.654417719 | 4.410385984 |
| 3.747328736 | 3.844535497 | 3.473152998 |
| 4.997359505 | 4.61624975  | 3.805036986 |
| 4.050182808 | 3.71164268  | 4.046147054 |
| 4.151878986 | 3.736865952 | 3.740764078 |
| 4.48609885  | 5.02310664  | 4.631887901 |
| 5.165732819 | 3.47797262  | 5.083312735 |
| 5.059007385 | 4.871860296 | 5.246532332 |
| 5.014093889 | 4.410778383 | 4.334274315 |
| 4.211088497 | 3.663405454 | 5.540829434 |
| 4.393766807 | 3.438576227 | 3.530613279 |
| 4.854550619 | 3.863899633 | 4.91241752  |

|             |             |             |
|-------------|-------------|-------------|
| 4.636557429 | 3.501645959 | 4.767153529 |
| 4.060525413 | 3.844854765 | 4.137270178 |
| 5.331171279 | 4.692901967 | 5.164835004 |
| 3.63695134  | 3.492866021 | 4.069852304 |
| 4.955170093 | 4.446482999 | 5.471957699 |
| 3.498490527 | 4.767587021 | 4.281403912 |
| 5.777239525 | 3.414654064 | 4.472230065 |
| 4.29735172  | 3.583713554 | 3.986071223 |
| 5.297750667 | 4.21879686  | 4.088075486 |
| 4.405060082 | 3.525693599 | 4.957773789 |
| 4.696457456 | 5.392461706 | 3.461000192 |
| 4.921799405 | 3.560417991 | 4.276058604 |
| 5.509524351 | 3.869015449 | 4.680489068 |
| 3.535142571 | 4.117841132 | 4.349434784 |
| 4.380131408 | 3.776572736 | 4.353546413 |
| 6.080317897 | 3.444268422 | 4.332376668 |
| 6.222162612 | 4.240744076 | 3.543224325 |
| 4.997990453 | 3.773110203 | 4.23620329  |
| 4.569189626 | 4.144282405 | 3.638553081 |
| 3.69381178  | 4.149046731 | 6.839758743 |
| 4.817490487 | 3.442160903 | 4.540671798 |
| 3.968807676 | 4.557894239 | 3.528163331 |
| 6.073396973 | 4.454974314 | 4.559574658 |
| 4.129575781 | 3.421689848 | 3.983887219 |
| 4.723302016 | 4.581764992 | 4.624429915 |
| 4.406684237 | 4.31314008  | 3.417708562 |
| 4.310925178 | 3.600139234 | 3.482932132 |
| 6.416340391 | 3.534128788 | 5.191087355 |
| 6.122657149 | 4.377843602 | 4.327499962 |
| 4.344592615 | 4.780382299 | 4.662515997 |
| 5.298672499 | 5.092959943 | 5.021760276 |
| 4.167533345 | 4.276312022 | 3.585698726 |
| 4.619148434 | 4.122127416 | 4.296267504 |
| 5.129669984 | 3.473381495 | 4.850594894 |
| 4.921618701 | 4.705644338 | 5.448201046 |
| 4.487205984 | 3.603582037 | 4.885941088 |
| 4.504475429 | 3.552300165 | 4.617941287 |
| 5.5282489   | 4.355042824 | 5.053118046 |
| 6.633752705 | 5.04123361  | 4.70726172  |
| 3.784419    | 3.908081407 | 4.760706761 |
| 4.492964898 | 4.54091449  | 5.874213507 |
| 4.160757692 | 3.43305035  | 3.867084084 |
| 3.593472341 | 3.49243914  | 7.394205937 |
| 6.04568665  | 4.526808429 | 5.385290863 |
| 4.556635893 | 4.146575548 | 3.679870428 |
| 4.297025096 | 3.518704447 | 3.925831009 |

|             |             |             |
|-------------|-------------|-------------|
| 3.535408622 | 6.105107959 | 6.69480491  |
| 3.488898147 | 4.334281779 | 4.081927018 |
| 3.481892863 | 3.896659806 | 5.39397779  |
| 4.072115508 | 3.429230591 | 3.669999577 |
| 5.90805155  | 7.651988422 | 6.125589742 |
| 4.321134484 | 3.956928638 | 4.233473883 |
| 3.478070712 | 4.139016278 | 4.081005293 |
| 4.818095411 | 3.588803003 | 4.38748981  |
| 3.805537109 | 4.808513386 | 3.758305083 |
| 3.569482649 | 4.898777076 | 6.312533331 |
| 3.681369279 | 5.062265879 | 3.384413612 |
| 4.486299796 | 3.378086216 | 4.960989618 |
| 4.47176705  | 3.599603205 | 4.71731002  |
| 4.578002179 | 4.092210588 | 4.000910038 |
| 3.529807871 | 3.558957038 | 3.677720568 |
| 5.274096029 | 3.460187585 | 4.582908406 |
| 3.920214589 | 4.02760948  | 4.585819947 |
| 3.490956355 | 5.051360395 | 4.679240564 |
| 3.97075688  | 3.581331951 | 4.241280941 |
| 4.736138655 | 3.643305254 | 3.886360914 |
| 4.620942405 | 4.440540762 | 4.557679579 |
| 4.230040357 | 4.216727266 | 3.614339387 |
| 3.910612003 | 3.996964533 | 4.148367255 |
| 3.51478892  | 4.544947352 | 4.318466651 |
| 5.986882846 | 3.601661038 | 5.085009036 |
| 4.704259221 | 4.234563114 | 4.35666079  |
| 5.23938896  | 4.62344124  | 5.37930481  |
| 4.315208883 | 3.994583056 | 3.753366865 |
| 3.609253011 | 4.420203383 | 4.392343256 |
| 4.850538278 | 4.681688245 | 4.685298592 |
| 4.15439224  | 4.290641292 | 3.666602956 |
| 4.045884772 | 4.669002146 | 4.239684667 |
| 4.40921871  | 3.896902904 | 3.814262336 |
| 5.09563043  | 3.817084365 | 3.782386658 |
| 7.194969231 | 3.399693829 | 6.396555626 |
| 3.414154709 | 3.527778558 | 4.108019516 |
| 4.765142776 | 4.122475326 | 4.321529989 |
| 3.532518682 | 3.752170591 | 3.65683269  |
| 3.636345244 | 3.621329452 | 4.169989233 |
| 4.219789976 | 3.461088857 | 4.043226242 |
| 4.575210884 | 3.997086852 | 4.16762904  |
| 4.190307061 | 4.878969494 | 4.319917217 |
| 4.928340801 | 4.266740645 | 4.510065913 |
| 4.524425069 | 4.133738268 | 3.669723132 |
| 4.896833874 | 3.797816517 | 4.846724164 |
| 5.212876386 | 3.508504719 | 4.20182031  |



|             |             |             |
|-------------|-------------|-------------|
| 4.136138552 | 3.58556668  | 3.678444875 |
| 5.539108367 | 3.841638991 | 4.329969445 |
| 5.752276197 | 4.248915749 | 5.117091508 |
| 5.0355382   | 5.561560543 | 6.257313201 |
| 4.654706289 | 3.436126301 | 4.617672722 |
| 4.512636733 | 4.928542419 | 3.675412237 |
| 5.792474832 | 4.496635918 | 5.31043926  |
| 4.671717883 | 3.589358886 | 4.411832742 |
| 4.675861354 | 4.758508497 | 3.832410175 |
| 4.280175555 | 3.519599192 | 3.665766136 |
| 3.785150818 | 3.392613455 | 5.429224495 |
| 4.83375396  | 3.408622019 | 6.105851918 |
| 4.025207143 | 4.094418797 | 4.778281081 |
| 6.583090056 | 7.203376149 | 5.508951084 |
| 4.034868943 | 3.941126476 | 4.28709613  |
| 7.543599818 | 4.51915858  | 4.551760044 |
| 4.125225192 | 4.032881347 | 3.708227728 |
| 5.307489716 | 3.857632778 | 5.292351186 |
| 4.036068252 | 4.13563417  | 4.29770693  |
| 4.538207351 | 3.425537406 | 3.783503383 |
| 4.771613343 | 4.464346431 | 3.435626128 |
| 4.167654503 | 3.486336816 | 3.976566177 |
| 4.076615252 | 4.261089663 | 3.639304337 |
| 3.707281412 | 3.796687117 | 4.103241958 |
| 4.52264013  | 3.788158816 | 4.444834201 |
| 4.36596688  | 3.858125667 | 4.221720044 |
| 4.407236139 | 3.394396488 | 4.328438122 |
| 4.704966127 | 4.980099477 | 4.817281741 |
| 4.418735082 | 3.404396063 | 4.23755627  |
| 4.357763183 | 5.055204862 | 4.462795263 |
| 4.138665984 | 3.516624646 | 3.835141967 |
| 9.88265731  | 3.539416738 | 4.833592399 |
| 3.411531148 | 3.499807315 | 3.820420301 |
| 4.595575615 | 3.586871558 | 4.133485522 |
| 4.015408552 | 3.809630428 | 4.086254957 |
| 5.630945978 | 3.371802641 | 3.994868693 |
| 5.715525975 | 4.619775102 | 5.12257111  |
| 3.477538555 | 4.701748959 | 3.712457331 |
| 4.126472807 | 3.732393879 | 4.018945858 |
| 3.999130315 | 3.894916871 | 4.968845918 |
| 3.863580524 | 3.544680782 | 3.836249317 |
| 3.570884468 | 3.664184238 | 5.966090844 |
| 3.431116528 | 5.07737596  | 5.055118789 |
| 4.162954393 | 3.775449629 | 3.614034244 |
| 3.52529895  | 4.11972981  | 3.507037303 |
| 4.918524445 | 3.934210214 | 4.126986294 |

|             |             |             |
|-------------|-------------|-------------|
| 4.631244707 | 4.071399202 | 4.117869828 |
| 5.015980794 | 3.374814805 | 3.520565511 |
| 3.828353825 | 3.70832808  | 3.440739534 |
| 3.367658612 | 4.789651916 | 4.576579101 |
| 4.892513413 | 3.464222201 | 4.425936594 |
| 4.958034335 | 3.456195988 | 4.432820287 |
| 5.016234539 | 4.047129941 | 3.747357792 |
| 3.533111039 | 4.657373846 | 3.941365384 |
| 5.501796523 | 4.321987692 | 3.610290658 |
| 4.990289219 | 5.67184084  | 5.846164174 |
| 4.206242851 | 3.732283746 | 3.940716767 |
| 4.511180753 | 3.531014298 | 4.739334399 |
| 3.498343351 | 3.43511824  | 3.574627157 |
| 4.368579514 | 5.799321095 | 4.442377367 |
| 4.328449847 | 3.431283584 | 3.636547466 |
| 3.848009238 | 3.96968809  | 4.530121023 |
| 7.418510221 | 5.131579153 | 4.297956798 |
| 3.898529085 | 4.559431266 | 4.194197873 |
| 3.756896549 | 4.439659115 | 5.074311507 |
| 4.012184156 | 3.709612312 | 4.0783401   |
| 3.547024884 | 4.891972313 | 5.608777151 |
| 3.441505166 | 4.178650765 | 4.202912505 |
| 4.645528299 | 3.374291192 | 4.543191096 |
| 3.394752556 | 3.814148382 | 5.10907513  |
| 4.856491289 | 3.367400387 | 4.304659663 |
| 4.855721656 | 3.352202958 | 4.597675881 |
| 3.432483774 | 4.156284332 | 4.198814482 |
| 5.581167554 | 3.539275471 | 4.888865227 |
| 4.869691359 | 3.987483648 | 3.608913762 |
| 4.351277121 | 3.41630238  | 3.901875381 |
| 3.390518524 | 4.367140188 | 4.041697731 |
| 5.980633638 | 6.170668793 | 5.463215309 |
| 3.767741302 | 3.743794647 | 3.608187838 |
| 4.749187009 | 3.854886331 | 4.860145878 |
| 3.426510281 | 5.042086199 | 4.70545901  |
| 3.651501243 | 3.331093313 | 3.729065147 |
| 6.732374363 | 4.346682074 | 3.517104527 |
| 4.278754988 | 3.659531281 | 3.968476297 |
| 3.759872171 | 5.735762833 | 6.372876399 |
| 5.147110486 | 5.099690897 | 3.8647883   |
| 3.955491349 | 3.49980208  | 3.381545383 |
| 3.838074802 | 3.824297132 | 4.699016406 |
| 3.64010396  | 3.888231422 | 3.471563263 |
| 4.649785567 | 3.743153254 | 3.809538026 |
| 4.174240856 | 3.490437026 | 3.476937862 |
| 6.252243032 | 4.630482189 | 4.850278843 |

|             |             |             |
|-------------|-------------|-------------|
| 3.918300356 | 4.05243175  | 3.472716216 |
| 3.502887192 | 5.041342336 | 5.305613902 |
| 4.716121968 | 3.765830056 | 4.183479646 |
| 4.605825667 | 3.371224299 | 3.478064617 |
| 5.282813104 | 4.917998222 | 5.616763191 |
| 3.927620436 | 3.417642457 | 4.43467991  |
| 3.827918383 | 4.306592645 | 3.60951624  |
| 3.640200075 | 3.437298435 | 3.685780605 |
| 5.04055895  | 4.354921249 | 5.337340529 |
| 3.566200357 | 4.469180663 | 4.920114669 |
| 5.066809682 | 5.178872652 | 3.822570147 |
| 5.757596559 | 7.39932051  | 6.927202291 |
| 3.654865403 | 4.045722464 | 3.859736632 |
| 4.043868001 | 3.781860783 | 3.552388614 |
| 3.892392058 | 3.42603492  | 3.315475384 |
| 4.701260346 | 3.402229174 | 4.087617702 |
| 3.59302538  | 3.329771456 | 3.753180041 |
| 4.488766953 | 3.335754292 | 4.156739971 |
| 4.798955592 | 3.44316721  | 3.602976746 |
| 4.826281693 | 4.129269021 | 3.924869919 |
| 4.8114366   | 3.47639654  | 3.998112203 |
| 4.126877521 | 3.365544873 | 3.954258374 |
| 4.439409554 | 4.250955251 | 4.167513927 |
| 3.706410145 | 3.471442852 | 4.789060319 |
| 3.841892008 | 3.315652218 | 5.449312711 |
| 4.788364546 | 4.210906702 | 3.938967904 |
| 3.620191567 | 5.28001847  | 4.246812586 |
| 3.968832258 | 5.482095016 | 5.171266813 |
| 4.534635965 | 4.723167242 | 5.074519473 |
| 4.386185014 | 4.641391299 | 3.513455297 |
| 5.207839474 | 4.593493594 | 5.294467795 |
| 4.361735257 | 3.50544118  | 4.536390527 |
| 5.328777759 | 5.278354476 | 4.72848652  |
| 3.42478997  | 4.016373638 | 3.874232225 |
| 6.336692271 | 5.786738592 | 3.479264196 |
| 3.914791641 | 3.449611832 | 3.726696352 |
| 4.354679998 | 3.889517851 | 3.590223775 |
| 4.938213785 | 4.518473946 | 4.513009506 |
| 4.323611409 | 3.744810623 | 3.445634068 |
| 5.630757784 | 3.487959039 | 4.889084677 |
| 3.522920938 | 3.838343194 | 3.735041346 |
| 3.446889226 | 4.972775544 | 5.648492808 |
| 3.941151399 | 3.496740656 | 3.814610413 |
| 3.453348696 | 3.646419312 | 3.850837898 |
| 3.470175956 | 7.299814989 | 7.741697946 |
| 4.156708815 | 3.666600657 | 3.828574635 |

|             |             |             |
|-------------|-------------|-------------|
| 3.536370259 | 3.69501114  | 3.421587259 |
| 4.948228371 | 3.424678585 | 4.308522783 |
| 4.402874574 | 3.395722525 | 3.89940827  |
| 4.04482364  | 3.367903553 | 4.063526321 |
| 3.960247466 | 3.950219114 | 4.018692068 |
| 3.724617217 | 3.384061879 | 4.338863248 |
| 4.591683315 | 3.390635773 | 4.422746585 |
| 4.663767533 | 3.681188579 | 4.163618898 |
| 5.093010781 | 4.219091368 | 4.099737486 |
| 4.576262809 | 3.842715071 | 3.359233758 |
| 4.23335612  | 4.466368829 | 5.031118993 |
| 4.196844542 | 3.333786735 | 4.058452558 |
| 3.79462611  | 4.307079468 | 4.67204243  |
| 3.553254163 | 3.401018521 | 4.897660182 |
| 4.42835466  | 4.480510372 | 3.402372113 |
| 5.18318352  | 4.928325288 | 4.354315973 |
| 4.486163267 | 3.71612588  | 3.727491429 |
| 6.688437804 | 3.808621517 | 3.957990465 |
| 4.491003288 | 3.840088162 | 4.188116349 |
| 6.368274332 | 5.609211822 | 5.165326652 |
| 4.827597952 | 4.080094485 | 3.462422255 |
| 5.008280083 | 4.965569529 | 5.732940457 |
| 6.192128587 | 4.956863057 | 5.976707372 |
| 5.026959515 | 3.868797143 | 4.65216432  |
| 5.165512773 | 4.797824479 | 5.17227916  |
| 5.307280679 | 4.129427633 | 4.643939864 |
| 4.719280312 | 4.437418258 | 3.42750765  |
| 6.613853119 | 4.604008735 | 6.144835332 |
| 3.572173538 | 3.353095206 | 3.985830384 |
| 4.011757585 | 3.351885275 | 3.706132012 |
| 4.888588605 | 4.285912059 | 4.329245552 |
| 3.771286202 | 4.030478008 | 4.122497601 |
| 3.973330066 | 3.464353962 | 4.1915573   |
| 3.738066971 | 3.718811229 | 3.411813428 |
| 4.470562006 | 3.458894511 | 3.382983827 |
| 3.505250409 | 4.402916347 | 4.471066238 |
| 6.061044474 | 4.780692472 | 4.707685272 |
| 4.149796596 | 4.186598967 | 4.171774341 |
| 6.040795272 | 3.668058703 | 4.158187651 |
| 4.648634559 | 4.367358361 | 4.057000052 |
| 3.545836999 | 3.618889379 | 3.697403021 |
| 5.893371032 | 5.090414661 | 5.397171199 |
| 4.868005347 | 4.939080315 | 3.531412979 |
| 4.153190585 | 3.402445757 | 4.734141557 |
| 5.26391057  | 4.820868421 | 4.830976616 |
| 5.059623239 | 4.000659117 | 4.56875956  |

|             |             |             |
|-------------|-------------|-------------|
| 3.568885094 | 3.341907791 | 5.488848336 |
| 6.345425698 | 3.339449198 | 5.038502517 |
| 4.083993108 | 4.471784029 | 4.457588529 |
| 3.671597293 | 3.363717505 | 4.267955683 |
| 3.369893746 | 4.263525746 | 4.771619463 |
| 4.208303522 | 4.077904442 | 3.387277443 |
| 5.402812904 | 4.563674817 | 3.486350848 |
| 4.825140498 | 4.610089091 | 3.724371938 |
| 4.793330649 | 4.309598189 | 5.23306705  |
| 3.50786679  | 3.860049692 | 3.674563602 |
| 4.870664978 | 3.362604647 | 4.682515099 |
| 5.175614727 | 3.677270986 | 3.884197461 |
| 4.52090184  | 3.345293228 | 4.181946314 |
| 4.20605227  | 3.806057199 | 4.255303786 |
| 4.456348041 | 4.640553902 | 4.51796712  |
| 5.308095774 | 3.397529075 | 5.160105429 |
| 3.481729192 | 3.83064542  | 3.788868256 |
| 3.3820798   | 4.101998327 | 3.80588321  |
| 4.52430318  | 3.334247671 | 4.756905493 |
| 4.352459375 | 5.116459181 | 5.69685413  |
| 3.89759418  | 3.704285845 | 3.43761338  |
| 3.590540783 | 3.426711917 | 3.664232635 |
| 4.379702153 | 4.814935477 | 4.162536391 |
| 4.841027146 | 4.619057483 | 4.795479759 |
| 4.861199119 | 4.047830005 | 6.125866799 |
| 3.385556026 | 3.55228456  | 3.543690519 |
| 4.731647289 | 4.075243924 | 6.092140138 |
| 3.700835342 | 3.352333357 | 3.902230172 |
| 4.162172679 | 3.337407587 | 4.344222206 |
| 6.700459786 | 5.602523366 | 5.577734449 |
| 4.140762346 | 5.161592157 | 4.790027227 |
| 4.862660708 | 4.374584053 | 4.66247404  |
| 4.920995821 | 3.745116866 | 3.94915701  |
| 4.992787734 | 4.321146759 | 5.685705334 |
| 4.038797906 | 3.686751981 | 4.413011548 |
| 3.805106175 | 3.346357825 | 3.979220245 |
| 4.913063088 | 3.350289196 | 4.374711257 |
| 4.349424416 | 3.999042404 | 3.375434215 |
| 4.47393679  | 4.218521511 | 5.008846064 |
| 4.068669312 | 3.305667976 | 4.662766058 |
| 5.351937604 | 3.333360481 | 4.639648937 |
| 5.943966741 | 3.673818058 | 4.430676684 |
| 4.168974435 | 3.786387589 | 4.275319492 |
| 5.950440578 | 3.464169341 | 5.008717207 |
| 3.926317389 | 3.340372824 | 3.403690095 |
| 4.148370837 | 3.340279999 | 4.093408705 |

|             |             |             |
|-------------|-------------|-------------|
| 4.733836074 | 3.846795809 | 4.678976217 |
| 3.312751079 | 3.98445428  | 4.104193877 |
| 4.521781489 | 3.863098729 | 4.347402455 |
| 6.533821023 | 5.824744645 | 5.226583855 |
| 5.57612787  | 3.707762348 | 4.224443301 |
| 4.250928343 | 3.739028114 | 5.045443779 |
| 4.070752769 | 3.417198571 | 3.546503943 |
| 3.810103871 | 3.421008031 | 4.406299233 |
| 3.596026743 | 4.04246497  | 4.59645626  |
| 4.921749766 | 3.326012088 | 4.021775153 |
| 4.595245237 | 3.469735995 | 3.326167853 |
| 4.569212616 | 4.301083109 | 3.834236205 |
| 4.098355848 | 3.40128081  | 4.049593987 |
| 4.245077021 | 3.468340693 | 4.384041128 |
| 4.830455379 | 3.559585177 | 3.28562325  |
| 4.239489646 | 4.171408804 | 3.415906747 |
| 4.130832167 | 3.286679224 | 3.87617263  |
| 5.004137881 | 4.702888219 | 4.977547543 |
| 3.815238153 | 3.451756564 | 3.674647625 |
| 3.945114727 | 5.398350323 | 5.9003379   |
| 5.165111452 | 4.797227499 | 4.808610866 |
| 4.630406785 | 3.955215452 | 3.789820564 |
| 5.142708793 | 4.830805908 | 3.533917612 |
| 3.374645957 | 3.877467155 | 3.473184282 |
| 5.222883605 | 4.070477801 | 4.84356815  |
| 4.230953258 | 3.247870545 | 4.288555797 |
| 4.888275472 | 4.416604476 | 3.436713134 |
| 4.453049162 | 4.84952631  | 4.030660252 |
| 4.096005055 | 4.127101695 | 3.640875455 |
| 3.551893675 | 5.199761526 | 4.590529446 |
| 3.958772154 | 3.460894857 | 3.352594328 |
| 4.712240459 | 3.469613445 | 4.505437565 |
| 4.723901133 | 4.008964977 | 3.400815142 |
| 5.91648544  | 4.883350751 | 4.480080149 |
| 4.14068166  | 4.232603346 | 4.005692321 |
| 4.603773093 | 3.938542561 | 3.490611238 |
| 3.57503066  | 4.062776748 | 4.429253745 |
| 4.447111262 | 4.502769332 | 3.953403524 |
| 3.735011438 | 3.743853842 | 3.363766524 |
| 5.000186522 | 3.755393653 | 5.123636951 |
| 3.46863556  | 3.346541304 | 3.688300691 |
| 4.639574202 | 4.919234398 | 5.045707335 |
| 4.041695962 | 4.400951191 | 3.916099612 |
| 4.474226551 | 3.260610818 | 3.521348445 |
| 5.615571771 | 4.200208185 | 4.019912527 |
| 5.831400859 | 4.40587296  | 3.350873931 |

|             |             |             |
|-------------|-------------|-------------|
| 3.882941543 | 4.697555813 | 3.459877047 |
| 4.729189741 | 3.483628429 | 4.025368555 |
| 5.566145812 | 4.593609717 | 5.195523458 |
| 3.530649041 | 4.655490311 | 3.472200727 |
| 3.343809736 | 4.59538161  | 4.232168336 |
| 3.373833477 | 3.330217891 | 3.265871697 |
| 4.421612633 | 3.848387936 | 3.274038728 |
| 3.804841288 | 3.622828585 | 5.140316693 |
| 6.508548258 | 3.251085956 | 4.165833868 |
| 4.32453108  | 3.285608322 | 3.362542088 |
| 3.904545835 | 4.544886868 | 4.642802894 |
| 4.381914608 | 4.692792835 | 3.535252068 |
| 3.5434071   | 4.360659968 | 4.558242722 |
| 5.081862197 | 6.53297062  | 3.463752064 |
| 4.75252074  | 4.627299269 | 3.399767075 |
| 3.280792865 | 5.214918048 | 5.739089911 |
| 5.74688556  | 4.229699881 | 4.729119532 |
| 3.986595448 | 3.810211345 | 3.362555482 |
| 6.454925329 | 4.101421943 | 4.306271296 |
| 4.064421342 | 3.380315544 | 4.496481328 |
| 4.370343914 | 4.1647519   | 3.806887514 |
| 4.773822984 | 3.780856116 | 3.566878429 |
| 4.639561552 | 4.20356669  | 3.74479454  |
| 4.740816212 | 3.641976517 | 3.443538804 |
| 3.911720844 | 3.41911977  | 3.86824156  |
| 3.618262817 | 3.45117242  | 4.225297534 |
| 3.753198387 | 3.351212622 | 3.712585101 |
| 3.792446741 | 4.803475847 | 4.558583761 |
| 5.355577057 | 4.649110146 | 4.876710632 |
| 5.389027482 | 4.111407885 | 4.091195783 |
| 4.721213219 | 4.309831399 | 3.322395333 |
| 5.782406878 | 3.269679128 | 5.022221707 |
| 3.994125399 | 4.49718264  | 4.137726809 |
| 6.520554761 | 4.988088828 | 3.28727291  |
| 4.210827587 | 3.431237942 | 4.114577963 |
| 4.981956083 | 3.834581069 | 4.410240855 |
| 3.798062747 | 4.121350784 | 3.703701559 |
| 4.673553084 | 4.348525929 | 3.933932812 |
| 5.849376222 | 5.684129857 | 5.2540406   |
| 4.820072934 | 4.513154439 | 3.964102548 |
| 5.162439012 | 5.294509834 | 3.323023936 |
| 3.318104186 | 4.137777092 | 3.556918121 |
| 3.937541606 | 3.509333194 | 4.098084215 |
| 4.105937485 | 4.229856492 | 4.434326273 |
| 4.512409418 | 3.96293702  | 3.669367756 |
| 3.848124126 | 3.797071056 | 3.732538061 |

|             |             |             |
|-------------|-------------|-------------|
| 4.843872456 | 4.290338277 | 3.735906762 |
| 4.481314093 | 3.343577696 | 4.852398546 |
| 4.747739898 | 4.653314238 | 4.640935447 |
| 3.221029504 | 3.968542826 | 4.610860347 |
| 4.177071991 | 3.9136702   | 4.044450503 |
| 3.950491367 | 3.354908224 | 4.045291295 |
| 4.920514176 | 3.415782309 | 4.994865261 |
| 4.930893142 | 3.851841444 | 3.961297008 |
| 3.819374882 | 3.318307293 | 4.20493358  |
| 3.879138152 | 3.384688433 | 4.31924332  |
| 3.36048365  | 6.568211483 | 6.861794752 |
| 4.547161417 | 3.960919821 | 3.505393997 |
| 4.762809463 | 3.273669645 | 3.607357294 |
| 3.774186591 | 3.812292195 | 4.705073272 |
| 5.038550615 | 4.614426334 | 4.625937749 |
| 3.934768259 | 3.628060459 | 4.984045801 |
| 3.600919448 | 3.83589821  | 3.32271489  |
| 4.305097105 | 4.762002628 | 4.875729147 |
| 3.650107013 | 3.545985692 | 3.2538934   |
| 4.285413214 | 3.768574033 | 4.205797613 |
| 3.356247724 | 3.923988301 | 3.8528364   |
| 4.438118228 | 3.519349141 | 4.432488084 |
| 3.974882194 | 3.23724566  | 4.852639233 |
| 4.867140676 | 3.39752759  | 4.296615148 |
| 4.379154325 | 4.143900655 | 5.030161715 |
| 4.306528234 | 3.787789315 | 3.535902837 |
| 4.400615806 | 3.297012788 | 3.798360967 |
| 4.827708821 | 4.564242559 | 3.816352006 |
| 4.636428689 | 3.458712992 | 4.414365455 |
| 5.229401749 | 3.220106846 | 3.639370414 |
| 4.06293937  | 4.228185658 | 4.649418047 |
| 8.126573585 | 3.236438245 | 4.769336367 |
| 4.619801044 | 4.02299087  | 3.331537956 |
| 5.993684671 | 4.991334833 | 4.606374913 |
| 3.933487882 | 3.257886171 | 4.97465719  |
| 4.256622601 | 3.841784128 | 4.761913556 |
| 3.947158482 | 4.697507785 | 5.94348991  |
| 5.631922687 | 5.970991607 | 4.563727881 |
| 4.405948623 | 3.415401438 | 4.657388832 |
| 3.297468162 | 4.072358251 | 4.052850028 |
| 4.688674417 | 5.519913809 | 4.247017663 |
| 4.663511468 | 3.343910709 | 4.112331554 |
| 3.882875209 | 3.461649339 | 4.248763666 |
| 5.82550779  | 5.294505881 | 6.665934182 |
| 4.48262768  | 3.398472822 | 3.398887397 |
| 4.789605836 | 4.328203586 | 3.938628233 |



|             |             |             |
|-------------|-------------|-------------|
| 3.368766747 | 5.125197908 | 6.588897953 |
| 3.964895754 | 6.477902537 | 4.565698228 |
| 5.782031075 | 4.96109141  | 5.128688571 |
| 4.538776757 | 3.468724111 | 4.581923647 |
| 4.218613845 | 3.666887753 | 3.627096408 |
| 4.097838368 | 3.298940062 | 4.708339198 |
| 3.407401628 | 3.452660942 | 3.987555179 |
| 4.020897446 | 3.778066322 | 3.654113436 |
| 4.334629888 | 4.409100454 | 3.381013089 |
| 4.051531211 | 3.368203938 | 4.975099548 |
| 4.189257209 | 3.247507396 | 3.942229745 |
| 3.248582082 | 5.51538775  | 5.400122644 |
| 5.481492145 | 5.389367531 | 5.17602364  |
| 3.98767151  | 3.43971487  | 3.884011898 |
| 4.256159043 | 4.553351294 | 3.370330536 |
| 3.350592648 | 4.014461952 | 3.353974437 |
| 4.911556752 | 3.632940954 | 5.367607956 |
| 5.050685479 | 4.492524451 | 3.604566077 |
| 4.933548468 | 3.509791547 | 4.158035141 |
| 3.907164764 | 3.824739978 | 3.41567228  |
| 4.436482904 | 4.422254024 | 3.59255925  |
| 4.775545797 | 3.216229231 | 5.173920828 |
| 5.330892039 | 4.535352324 | 3.892754433 |
| 3.400391558 | 4.351090065 | 5.073421878 |
| 4.693176024 | 3.428033311 | 4.015880166 |
| 7.203792679 | 3.226965264 | 6.511370928 |
| 4.329228287 | 4.469058986 | 6.04650133  |
| 5.570248792 | 3.545720269 | 3.514203335 |
| 4.723960723 | 3.734298646 | 4.721825492 |
| 4.184777161 | 5.563608627 | 5.543973766 |
| 4.516004172 | 3.879239406 | 3.220025794 |
| 4.059222641 | 4.001597156 | 3.66082362  |
| 4.619584965 | 4.375486068 | 5.211277835 |
| 3.706886434 | 5.261555859 | 4.459413439 |
| 4.207314276 | 3.25914128  | 3.620703973 |
| 3.867218275 | 3.215533277 | 4.03238043  |
| 3.813055717 | 3.460084956 | 4.403551999 |
| 5.359764422 | 3.93941542  | 5.030110977 |
| 4.887410135 | 3.858677401 | 3.327920173 |
| 3.289248104 | 3.401653506 | 4.448968836 |
| 4.922859654 | 3.933059028 | 3.282798782 |
| 5.082410626 | 3.238796794 | 4.223168683 |
| 4.003889991 | 3.938740795 | 3.272096967 |
| 4.68892731  | 4.287296397 | 4.884402905 |
| 3.708248447 | 3.258423268 | 3.404899906 |
| 4.170691096 | 4.657119358 | 4.23314834  |

|             |             |             |
|-------------|-------------|-------------|
| 3.910014836 | 3.370560392 | 4.431823473 |
| 6.667474177 | 5.022720739 | 3.381390183 |
| 4.627453554 | 3.653485609 | 4.158275083 |
| 4.243236178 | 3.337219397 | 5.576801625 |
| 4.750505498 | 3.862396989 | 3.749056705 |
| 4.786567324 | 3.831256522 | 4.222425319 |
| 3.297163644 | 5.073927281 | 5.362886986 |
| 6.493514513 | 4.919099112 | 4.893187492 |
| 3.686954822 | 5.357407437 | 5.74670612  |
| 6.305976742 | 3.214615108 | 5.558340746 |
| 3.192563684 | 3.931160418 | 6.032581258 |
| 4.490846708 | 3.716591709 | 3.188915411 |
| 3.179751098 | 3.772052064 | 4.031936832 |
| 4.417243114 | 5.112791078 | 4.66377124  |
| 4.218171512 | 3.922039902 | 3.811019925 |
| 4.84299624  | 3.262309407 | 4.451521018 |
| 3.865553855 | 3.840849971 | 3.281548815 |
| 4.998485036 | 4.276776397 | 3.607624645 |
| 4.08679635  | 4.036664439 | 3.25948407  |
| 4.678630534 | 4.509351243 | 4.821223353 |
| 3.783822822 | 3.567006513 | 3.330904956 |
| 4.751061066 | 4.285985989 | 3.763250358 |
| 4.885269064 | 3.91073627  | 4.124739513 |
| 5.104378273 | 3.795002364 | 4.89509543  |
| 3.511838389 | 3.212861385 | 3.489684066 |
| 3.723545878 | 4.136630772 | 4.006601001 |
| 4.049653171 | 3.90247994  | 3.363367812 |
| 3.830809783 | 3.408584187 | 3.949255472 |
| 4.532532868 | 3.666584895 | 4.065168353 |
| 4.169842783 | 3.817266437 | 4.374052429 |
| 4.364277114 | 5.610508677 | 5.174713914 |
| 4.460728606 | 4.492540775 | 3.92401496  |
| 3.285592142 | 3.661414161 | 3.436952712 |
| 5.192489349 | 5.114144808 | 3.23722638  |
| 6.445539505 | 4.366780463 | 4.147748163 |
| 4.55474496  | 3.807192471 | 4.94501663  |
| 5.132091262 | 3.890935929 | 4.69199866  |
| 4.063238406 | 4.070016226 | 4.544719275 |
| 3.292274593 | 4.387420174 | 4.322011402 |
| 3.869372316 | 5.085994917 | 4.612962721 |
| 4.093127164 | 3.807757041 | 3.797371766 |
| 4.072085444 | 3.265352276 | 3.795485613 |
| 4.604203992 | 3.265655539 | 3.868618551 |
| 4.416683997 | 3.794481034 | 4.251778509 |
| 3.590395904 | 4.297260945 | 3.791645688 |
| 5.698042033 | 7.525747367 | 3.352625017 |

|             |             |             |
|-------------|-------------|-------------|
| 4.47319015  | 5.770056949 | 5.497799164 |
| 3.670979967 | 3.282035454 | 3.307912115 |
| 3.302587427 | 4.919682281 | 5.147229635 |
| 3.501242651 | 3.571841515 | 3.712234883 |
| 3.605194193 | 3.97932891  | 4.202468179 |
| 4.588300422 | 4.044313007 | 4.824735922 |
| 4.950385547 | 3.932663711 | 3.434507237 |
| 3.559849081 | 3.657005684 | 3.483888544 |
| 4.383112773 | 3.322844568 | 4.001852646 |
| 4.368421952 | 3.49323429  | 3.214506224 |
| 4.166425339 | 3.466943035 | 4.163199129 |
| 3.901874085 | 4.484942813 | 5.308279742 |
| 4.179039417 | 3.988810261 | 3.842924682 |
| 4.358958712 | 3.311395548 | 5.750229102 |
| 4.163827306 | 4.230749617 | 4.72622694  |
| 3.304708767 | 4.109495045 | 4.308358719 |
| 4.956007295 | 4.35381006  | 3.736099802 |
| 4.471672793 | 3.300601615 | 5.230409704 |
| 4.473142657 | 3.599730434 | 3.340213765 |
| 3.998814359 | 3.76652918  | 4.645051184 |
| 4.741259793 | 3.196160527 | 3.703898048 |
| 4.419241594 | 3.897766876 | 3.346315359 |
| 4.176695354 | 3.697627792 | 4.757678504 |
| 3.304367265 | 5.006596343 | 4.661913031 |
| 5.190411161 | 3.298818471 | 5.827795545 |
| 10.6617619  | 3.158116285 | 8.119445152 |
| 4.031537597 | 3.301544024 | 5.097773483 |
| 4.56463637  | 4.464327398 | 4.225816413 |
| 3.462902356 | 3.631723334 | 3.473154638 |
| 4.745076684 | 6.345568223 | 6.019353144 |
| 4.0122297   | 3.163327715 | 3.482666808 |
| 4.894626655 | 3.776997315 | 3.880905704 |
| 4.63302239  | 3.328436988 | 4.191177222 |
| 4.174525921 | 3.649875563 | 4.031722951 |
| 5.014929115 | 3.472926335 | 4.056420633 |
| 3.35441327  | 3.400748909 | 4.24699564  |
| 5.93755606  | 5.856371019 | 5.545798527 |
| 5.608157677 | 4.127108165 | 4.493456744 |
| 5.984060066 | 4.755082225 | 5.955073659 |
| 3.329549426 | 3.584968303 | 4.087028847 |
| 6.203977427 | 3.908168171 | 4.694941624 |
| 3.94257828  | 4.120258959 | 3.605182567 |
| 3.298629733 | 3.849093417 | 4.909399838 |
| 3.448093125 | 4.371731655 | 4.659940257 |
| 4.302214146 | 4.043798745 | 3.825794587 |
| 5.663210642 | 5.625547157 | 4.79912392  |

|             |             |             |
|-------------|-------------|-------------|
| 3.411286718 | 4.092052377 | 3.762593471 |
| 3.531673756 | 3.993511826 | 4.944108793 |
| 4.382397459 | 3.521440749 | 3.498942235 |
| 3.178174646 | 3.639582795 | 4.52042395  |
| 3.757877114 | 3.188711518 | 3.874682254 |
| 3.443575882 | 3.644950447 | 4.232731222 |
| 6.65819882  | 5.878384799 | 5.875810095 |
| 4.181815913 | 3.289876882 | 4.660706727 |
| 3.801247726 | 3.764087092 | 3.825978346 |
| 4.263664532 | 4.146074305 | 4.522123647 |
| 3.239877417 | 4.3095482   | 4.744314865 |
| 6.539074537 | 6.204765761 | 4.129998786 |
| 3.630040758 | 3.626066883 | 3.44718028  |
| 4.144841349 | 3.262230881 | 4.022325975 |
| 4.084763993 | 4.158638284 | 5.280775061 |
| 4.115975032 | 4.652653942 | 3.243018476 |
| 4.130010545 | 3.212135114 | 4.364074283 |
| 3.916574471 | 3.52996083  | 3.794252679 |
| 4.703255141 | 4.768150737 | 3.247044805 |
| 3.360274764 | 3.770276946 | 4.577939134 |
| 3.301663566 | 3.720655414 | 4.825607292 |
| 4.697816948 | 3.816233087 | 4.519727448 |
| 3.228415268 | 4.373297263 | 5.063508619 |
| 4.875509884 | 5.137760345 | 4.705807929 |
| 3.78698915  | 5.2710778   | 6.204257917 |
| 4.486348805 | 3.49707102  | 4.511401303 |
| 4.871268727 | 4.836929856 | 4.156777631 |
| 3.238208364 | 4.287349693 | 5.07690256  |
| 4.942336413 | 3.320873814 | 4.33623893  |
| 3.137844566 | 4.406756826 | 4.657381353 |
| 4.539407274 | 3.634968097 | 4.449221474 |
| 5.184393791 | 4.935932265 | 4.216135721 |
| 4.552402053 | 3.222767392 | 4.13856258  |
| 3.388791521 | 3.544036883 | 4.460763597 |
| 4.608653137 | 3.589658007 | 3.235050431 |
| 4.7048716   | 3.142269846 | 3.957838518 |
| 4.033703986 | 3.401237198 | 4.165124525 |
| 4.220377042 | 3.458784588 | 4.472300476 |
| 5.345776429 | 4.411111473 | 3.90619298  |
| 6.751558083 | 4.390106143 | 4.739047582 |
| 3.94634897  | 4.925153576 | 3.694143974 |
| 5.822952658 | 5.441768765 | 5.907178392 |
| 4.278466941 | 3.824474207 | 3.671108545 |
| 5.267784268 | 3.94099187  | 3.650186244 |
| 3.433561319 | 3.131693748 | 3.236678084 |
| 3.482040429 | 3.184326298 | 3.319154262 |

|             |             |             |
|-------------|-------------|-------------|
| 4.055520627 | 3.142837538 | 4.398268349 |
| 3.952790437 | 4.825378261 | 4.149316542 |
| 3.253536645 | 4.794665233 | 4.022376577 |
| 4.266088348 | 3.303889913 | 3.383840904 |
| 4.226800531 | 4.221736029 | 3.205864967 |
| 3.595874487 | 3.685616634 | 3.189586831 |
| 5.314426237 | 4.415737261 | 3.520495485 |
| 3.367324159 | 4.740793259 | 4.183937544 |
| 3.198192087 | 3.70285639  | 4.843003398 |
| 4.296765218 | 3.876790221 | 4.319044331 |
| 4.182269445 | 3.588328143 | 3.336761556 |
| 5.219802589 | 4.88022564  | 3.882486776 |
| 4.30403999  | 4.549930563 | 4.287110419 |
| 4.458778209 | 3.223563873 | 4.063175494 |
| 4.441697847 | 3.795257303 | 4.406202648 |
| 4.992863562 | 4.055128997 | 4.186678958 |
| 3.927351105 | 3.211526822 | 4.296369963 |
| 5.678550222 | 3.339773656 | 3.744588877 |
| 5.113270173 | 3.254560806 | 4.055685981 |
| 5.180590971 | 3.173674007 | 3.837153103 |
| 4.525912197 | 3.926033671 | 4.560475459 |
| 3.837971774 | 3.116231511 | 4.433038434 |
| 4.27477873  | 4.634609942 | 4.504142802 |
| 5.039018417 | 3.784509387 | 5.363812835 |
| 4.283496916 | 4.627440374 | 4.515330619 |
| 3.492457669 | 3.828734835 | 3.508021589 |
| 4.939098649 | 4.513369453 | 4.925483849 |
| 4.299825674 | 3.169505393 | 3.60617192  |
| 4.893629869 | 3.288433368 | 4.580011543 |
| 4.452620808 | 3.716584193 | 3.136446987 |
| 4.995820422 | 3.889393576 | 4.804644494 |
| 3.69807209  | 3.451045873 | 3.642396688 |
| 3.517909346 | 3.835328884 | 3.591629691 |
| 4.691086049 | 4.095410253 | 3.431074008 |
| 5.046084131 | 4.14899231  | 5.118709787 |
| 4.223178829 | 3.191410083 | 4.139608449 |
| 3.581266191 | 3.669269149 | 4.252042544 |
| 4.188664907 | 3.544622648 | 3.691403492 |
| 4.897559675 | 3.156431035 | 5.648006073 |
| 4.770824218 | 3.847518261 | 3.201992745 |
| 5.270252615 | 3.816721559 | 4.607630069 |
| 4.91586431  | 4.513399316 | 5.502804996 |
| 5.993853976 | 5.53436124  | 3.321776278 |
| 4.138210275 | 3.197601845 | 3.901957618 |
| 5.399672468 | 3.359652618 | 4.659452775 |
| 4.082907757 | 3.323356929 | 3.929374887 |

|             |             |             |
|-------------|-------------|-------------|
| 4.63741101  | 4.16174455  | 4.494571532 |
| 3.482333535 | 3.132375119 | 3.426308546 |
| 4.555867292 | 4.989285557 | 3.221149225 |
| 4.429260705 | 4.549106462 | 4.467660756 |
| 3.577809055 | 3.456567216 | 3.269766111 |
| 4.228935331 | 4.945583277 | 3.199107928 |
| 3.1396694   | 4.446396823 | 4.322858075 |
| 4.406150164 | 3.521998332 | 3.153116018 |
| 4.935346326 | 4.100153426 | 4.38212705  |
| 4.094780421 | 3.245724077 | 4.559039814 |
| 4.01893185  | 4.390758516 | 3.97644802  |
| 3.218106275 | 3.210755863 | 3.296410416 |
| 5.778576096 | 5.200719191 | 5.466374848 |
| 4.04421205  | 4.842456342 | 4.671667877 |
| 4.40183693  | 3.098999215 | 3.776478527 |
| 3.814139201 | 4.358979889 | 3.241157951 |
| 5.196181627 | 3.461329916 | 4.894654909 |
| 3.17709969  | 4.042788958 | 4.255923769 |
| 3.8593661   | 3.406943704 | 3.921679861 |
| 5.01154756  | 3.193390185 | 4.232171186 |
| 6.267609228 | 5.970795249 | 6.486530672 |
| 3.642710838 | 3.597691728 | 3.686275495 |
| 3.190245984 | 3.12417845  | 3.343588474 |
| 3.756852035 | 3.115821691 | 3.917740695 |
| 5.159354115 | 4.482398882 | 4.317855402 |
| 5.068787357 | 4.274686694 | 4.705552987 |
| 4.784410282 | 4.152168945 | 5.027703395 |
| 6.265222973 | 3.728233591 | 3.558331042 |
| 4.879716742 | 5.474102992 | 5.22979026  |
| 3.81544365  | 3.857263973 | 3.353656657 |
| 3.574289596 | 3.208433924 | 3.908631009 |
| 3.555240255 | 6.774196821 | 7.894015662 |
| 4.47809627  | 3.156524713 | 4.310870891 |
| 3.897305878 | 3.938188025 | 4.310878246 |
| 3.579851153 | 3.327670954 | 3.654146621 |
| 5.813561375 | 3.219021949 | 7.411793974 |
| 3.237922853 | 3.608252248 | 3.357562724 |
| 5.476583044 | 4.353115905 | 4.147603753 |
| 4.130467948 | 3.556031285 | 4.20505301  |
| 4.043636169 | 3.960639716 | 4.440590363 |
| 4.321068282 | 3.45047206  | 4.020887554 |
| 4.094817506 | 3.986085081 | 3.995755639 |
| 4.17055377  | 3.352707113 | 3.525784692 |
| 4.012811611 | 3.721464507 | 3.393122855 |
| 4.130730736 | 3.443419986 | 3.49056793  |
| 3.763705255 | 3.541126034 | 4.409063919 |

|             |             |             |
|-------------|-------------|-------------|
| 4.25881219  | 3.137349342 | 4.122885144 |
| 4.440622457 | 4.304977318 | 3.177051264 |
| 3.290047567 | 3.95232411  | 3.708608198 |
| 4.260042386 | 4.588370707 | 4.640501251 |
| 4.067274153 | 3.185719202 | 3.523725679 |
| 5.771782475 | 3.1299249   | 4.201739691 |
| 4.040012336 | 3.567497371 | 4.555797938 |
| 5.826072716 | 3.233155652 | 4.748766148 |
| 4.20180906  | 4.641983139 | 4.243908656 |
| 3.589369029 | 3.217991561 | 4.303112126 |
| 3.496958699 | 3.214964103 | 5.472487212 |
| 4.141099687 | 3.55299232  | 3.216401278 |
| 6.611875711 | 3.875982266 | 3.180569969 |
| 3.948802145 | 3.571598351 | 4.697342381 |
| 4.837398887 | 3.171847621 | 3.437535148 |
| 4.247563952 | 4.32388463  | 3.712166433 |
| 4.723100887 | 4.479850291 | 4.405734098 |
| 4.753781322 | 3.902142095 | 4.775824968 |
| 3.53481724  | 4.151430035 | 4.151713377 |
| 3.482981314 | 3.202172841 | 5.023092061 |
| 5.705360182 | 5.165438343 | 4.832866548 |
| 7.520433534 | 5.18851381  | 5.424552722 |
| 6.068428678 | 6.131955979 | 6.125215655 |
| 5.926593196 | 5.360218621 | 5.277120172 |
| 3.886137285 | 3.242483325 | 4.707121125 |
| 4.559200466 | 3.8481042   | 3.142740317 |
| 4.01423868  | 4.337458438 | 4.206268779 |
| 4.070608204 | 3.731769637 | 3.231965246 |
| 3.354441619 | 4.856187333 | 4.736571204 |
| 4.380480437 | 3.844851177 | 3.965917283 |
| 4.373888773 | 4.876522223 | 5.04565538  |
| 3.27650249  | 3.702860663 | 3.645940728 |
| 3.290926458 | 4.422585496 | 4.805824519 |
| 4.151704549 | 3.607266527 | 4.538339016 |
| 4.023506783 | 4.231685857 | 3.178330082 |
| 4.281369784 | 4.469226291 | 4.274139113 |
| 4.191965395 | 3.479501765 | 3.849155626 |
| 4.701570542 | 3.645753153 | 3.185881213 |
| 3.71290696  | 3.412763278 | 3.329362183 |
| 5.130663405 | 3.926783494 | 5.141104364 |
| 4.072807214 | 3.489834797 | 4.135166099 |
| 3.989858873 | 3.510108476 | 3.225134294 |
| 4.130215658 | 3.97980739  | 3.792321118 |
| 3.228295115 | 4.186924194 | 4.223015868 |
| 3.405016081 | 4.141905329 | 3.488008455 |
| 3.415055425 | 3.415931457 | 4.424821777 |

|             |             |             |
|-------------|-------------|-------------|
| 4.530063512 | 3.414107632 | 4.043717355 |
| 4.489232642 | 4.793644669 | 5.014658432 |
| 3.431197544 | 3.372956051 | 3.150547518 |
| 4.320511664 | 3.712040377 | 3.112776337 |
| 4.112805362 | 4.291793605 | 3.701354363 |
| 4.283182196 | 4.32529742  | 4.328516465 |
| 3.241009227 | 3.183190945 | 3.523676626 |
| 3.856392134 | 3.272365907 | 3.958565727 |
| 3.150634156 | 3.721195515 | 4.750411381 |
| 4.15641147  | 3.845025883 | 3.131145029 |
| 3.37834862  | 3.141723972 | 3.565088101 |
| 3.105338177 | 4.504571632 | 4.246586099 |
| 4.819208528 | 4.021166263 | 4.451466368 |
| 6.209773507 | 4.842446002 | 3.410478063 |
| 3.737816333 | 4.304066234 | 3.706106882 |
| 4.998029329 | 3.150839944 | 4.427302311 |
| 4.242903352 | 3.099032059 | 6.388338111 |
| 4.636461522 | 3.880571026 | 4.810866372 |
| 4.27269749  | 3.237529827 | 3.96027468  |
| 3.843780655 | 3.937204437 | 4.199523019 |
| 3.898546041 | 3.366361114 | 3.552964818 |
| 4.857746181 | 4.214162787 | 4.421230704 |
| 6.817792245 | 5.774345006 | 4.852945198 |
| 3.619405963 | 3.542261913 | 3.112209752 |
| 5.25548134  | 3.214268217 | 3.631896609 |
| 6.789221704 | 6.144046741 | 5.356129289 |
| 3.117673207 | 3.93582536  | 3.206253812 |
| 4.1236688   | 3.166813107 | 4.438352125 |
| 3.64954005  | 3.127678446 | 4.652357754 |
| 3.138428699 | 3.913455368 | 5.307349694 |
| 4.134034926 | 3.880338725 | 3.199280751 |
| 4.8527884   | 4.788771277 | 5.69805538  |
| 3.408827559 | 4.559805139 | 4.858665756 |
| 5.241307098 | 4.661645845 | 4.675081084 |
| 5.618503842 | 5.243661379 | 4.276559677 |
| 3.852798958 | 4.124744285 | 4.712898995 |
| 4.648944029 | 4.720007229 | 3.789467177 |
| 3.683082177 | 3.559871372 | 4.287126681 |
| 3.148750074 | 3.764698353 | 3.91618089  |
| 3.41461961  | 3.522933307 | 4.152138655 |
| 3.25244852  | 6.347415575 | 4.055126605 |
| 4.025729375 | 5.415929273 | 3.442316924 |
| 4.944750084 | 4.089586173 | 3.092130995 |
| 3.823349203 | 3.333179136 | 3.587303058 |
| 4.246051012 | 3.143112927 | 3.324440823 |
| 4.780445026 | 3.263281013 | 5.087953136 |



|             |             |             |
|-------------|-------------|-------------|
| 4.409531246 | 4.286898417 | 3.698973529 |
| 3.439162982 | 3.581467043 | 3.673460857 |
| 4.240727716 | 4.485506714 | 4.514718062 |
| 4.012327235 | 3.265348415 | 3.065920322 |
| 4.915680346 | 3.949035552 | 4.928196252 |
| 4.399807809 | 3.541536646 | 4.568416554 |
| 3.344087595 | 3.061278783 | 3.552316236 |
| 6.954685803 | 5.635182988 | 5.916643775 |
| 4.68982414  | 4.015951993 | 4.854617495 |
| 6.800318178 | 3.263437831 | 4.567961484 |
| 4.627099661 | 3.555972338 | 3.647922079 |
| 3.77888737  | 4.587557439 | 3.353813411 |
| 3.935196863 | 3.053603426 | 3.71173911  |
| 4.257482731 | 4.097662931 | 3.49998465  |
| 4.283218108 | 4.230233719 | 4.020296438 |
| 4.470520889 | 3.806845263 | 3.24133095  |
| 5.662194666 | 4.231480621 | 4.329275458 |
| 4.756927189 | 3.186067817 | 3.335688478 |
| 3.83818872  | 3.84312864  | 3.740942661 |
| 3.244464894 | 7.667172052 | 3.17612336  |
| 4.491738557 | 4.838518499 | 3.288440946 |
| 3.156701419 | 5.432463422 | 5.619693897 |
| 5.367272244 | 4.449385804 | 3.229879055 |
| 3.85305049  | 3.171052585 | 3.234803635 |
| 3.394091178 | 3.085882942 | 3.452067476 |
| 4.125504074 | 3.106795573 | 3.92051687  |
| 8.10693966  | 3.16960597  | 5.756826662 |
| 5.396298765 | 3.66596604  | 3.999821205 |
| 4.218914854 | 6.009931541 | 4.417379075 |
| 3.931593409 | 3.980235436 | 4.318871089 |
| 3.644117803 | 4.231805039 | 3.800705212 |
| 5.989032051 | 3.270205164 | 3.680267008 |
| 5.321614497 | 3.083356349 | 4.008909879 |
| 3.046612124 | 3.266544046 | 3.426614516 |
| 4.534706436 | 4.029637382 | 4.513602226 |
| 6.024658938 | 3.981340082 | 4.333886063 |
| 4.455851776 | 4.398295808 | 4.785542418 |
| 4.564918771 | 4.718792807 | 4.165181875 |
| 5.364401282 | 5.199726201 | 3.900626898 |
| 3.418959025 | 3.6386455   | 3.28917997  |
| 5.178331237 | 4.785033201 | 3.922964775 |
| 5.229280337 | 3.201194231 | 4.154889697 |
| 4.420850955 | 3.983184672 | 4.015423536 |
| 4.603431675 | 4.197233363 | 4.349611943 |
| 4.069048054 | 3.691540573 | 3.515930168 |
| 3.178982412 | 3.565358897 | 3.309293562 |

|             |             |             |
|-------------|-------------|-------------|
| 4.067290772 | 3.1494771   | 4.796032543 |
| 3.085858584 | 3.362839916 | 4.640935171 |
| 4.152784377 | 3.047274078 | 4.028954176 |
| 5.156529928 | 4.118652187 | 4.037957428 |
| 4.837215363 | 3.296083453 | 4.616182464 |
| 3.478120671 | 3.320796051 | 3.452320365 |
| 3.775931676 | 3.377368089 | 3.321064243 |
| 3.617630434 | 6.060449765 | 5.486970897 |
| 4.037524805 | 3.613134945 | 3.748323119 |
| 4.45410119  | 3.5795289   | 4.197064625 |
| 3.111507669 | 4.016160796 | 3.729061584 |
| 4.276171212 | 3.141775104 | 3.600280706 |
| 3.766211307 | 3.334264541 | 4.188415214 |
| 3.875113485 | 3.64271215  | 3.0358666   |
| 3.118609909 | 3.6316588   | 5.29019617  |
| 3.99776584  | 3.420365444 | 3.298446952 |
| 4.329964846 | 3.364068033 | 4.455809635 |
| 3.18455168  | 3.707553808 | 4.478038956 |
| 4.829733409 | 4.512048239 | 4.180999529 |
| 4.56354089  | 3.093264509 | 4.631021303 |
| 3.138568945 | 3.115070277 | 3.531039244 |
| 3.723424705 | 3.652562966 | 3.927282644 |
| 4.51410397  | 3.083753163 | 4.192008467 |
| 4.055596259 | 3.172111275 | 3.19577409  |
| 3.500536246 | 4.48799755  | 3.138043437 |
| 3.591646869 | 4.090434286 | 3.819110187 |
| 4.089845149 | 3.144119471 | 4.090330854 |
| 3.803929576 | 3.396586654 | 4.066881342 |
| 3.472061871 | 3.210608148 | 3.85466504  |
| 4.248499146 | 4.8355324   | 3.16829624  |
| 3.457344563 | 4.034879683 | 3.900816097 |
| 4.919703454 | 4.879052779 | 4.065746993 |
| 4.390933135 | 3.357185167 | 3.155498591 |
| 4.353907985 | 3.782845133 | 3.207071695 |
| 3.741791183 | 3.969659605 | 3.349552886 |
| 3.66730233  | 3.626492862 | 3.817642243 |
| 3.866325686 | 4.193761534 | 4.725732386 |
| 3.008442914 | 4.332559426 | 4.506893383 |
| 3.750911746 | 3.022011555 | 3.560468932 |
| 3.34795613  | 4.91298606  | 4.407936593 |
| 5.480211122 | 4.995416976 | 5.176490657 |
| 4.496871625 | 4.012621418 | 3.665192958 |
| 3.885238034 | 3.291904165 | 3.30989373  |
| 4.479158295 | 3.162801268 | 3.777494557 |
| 4.350002991 | 3.012937118 | 4.449453117 |
| 3.98871661  | 3.404429254 | 3.022370749 |

|             |             |             |
|-------------|-------------|-------------|
| 4.765362335 | 4.155967381 | 3.288203166 |
| 3.773389283 | 3.924455228 | 3.768529472 |
| 4.851623747 | 4.717667276 | 4.135148513 |
| 3.970390394 | 4.781635822 | 4.513358512 |
| 4.790605272 | 3.775611156 | 4.080945438 |
| 3.943231472 | 3.37165999  | 3.037644835 |
| 3.901712675 | 3.569091841 | 4.30638041  |
| 3.842140885 | 3.153771544 | 3.574830249 |
| 3.649273888 | 3.553934707 | 3.102067921 |
| 3.613824015 | 3.220683607 | 3.877536412 |
| 4.742183336 | 3.663533951 | 3.736042823 |
| 4.000564369 | 3.22444801  | 3.146817027 |
| 5.378857766 | 3.858649839 | 4.983321698 |
| 4.54723052  | 3.954471218 | 3.975564806 |
| 4.707659387 | 3.039098055 | 4.025352741 |
| 4.804794083 | 3.038651782 | 3.501811453 |
| 4.104854746 | 3.126527052 | 3.354825129 |
| 5.291818129 | 3.590968914 | 5.464306739 |
| 4.103749318 | 3.232373153 | 3.410974236 |
| 3.117418715 | 5.805766114 | 7.470336466 |
| 3.796939208 | 3.960293598 | 4.079874494 |
| 4.900161461 | 4.628455343 | 5.077766549 |
| 4.424166351 | 4.536785981 | 3.928661264 |
| 3.830493274 | 4.060627684 | 4.128435458 |
| 5.458204393 | 3.048066726 | 5.088378358 |
| 3.626222371 | 3.530987477 | 3.701755463 |
| 3.811722647 | 3.266892513 | 3.381286817 |
| 4.930727947 | 6.27449549  | 4.516618985 |
| 5.127056762 | 5.110539167 | 5.474069898 |
| 3.32232611  | 3.70736914  | 3.080112493 |
| 3.134391908 | 3.838889634 | 5.224312117 |
| 4.407245082 | 3.006269016 | 3.855531139 |
| 3.558970904 | 3.333993088 | 3.707746307 |
| 3.352216485 | 4.379875086 | 5.416406881 |
| 5.951529106 | 3.166006911 | 9.545347355 |
| 5.781106786 | 4.677441048 | 5.328623171 |
| 6.719268    | 5.711643172 | 3.134128928 |
| 4.435650878 | 3.052729706 | 3.889663423 |
| 3.816509023 | 3.764832555 | 3.415537473 |
| 4.081943241 | 2.99085208  | 4.724882913 |
| 3.19166848  | 3.168692342 | 3.506204845 |
| 3.117688047 | 3.394481078 | 3.592889763 |
| 4.447548009 | 2.969620009 | 3.386479965 |
| 3.362512908 | 3.776157893 | 4.28040187  |
| 4.190102404 | 2.995720532 | 4.203806993 |
| 3.055878065 | 3.268253462 | 3.214565368 |

|             |             |             |
|-------------|-------------|-------------|
| 4.632942818 | 4.404093075 | 3.267519009 |
| 3.76017938  | 3.451191268 | 5.735783529 |
| 5.104626232 | 3.711672757 | 4.863068667 |
| 4.930609045 | 3.139298369 | 4.499761915 |
| 3.474227686 | 5.648626595 | 4.328087473 |
| 3.225452269 | 3.679060941 | 3.624600674 |
| 2.988002514 | 3.63343435  | 3.707883144 |
| 5.08865262  | 3.115632298 | 5.009053114 |
| 4.326702759 | 3.104456809 | 3.303902953 |
| 3.611702565 | 4.311922198 | 3.204139409 |
| 4.656643873 | 4.364702343 | 5.137986099 |
| 4.70574168  | 3.356733938 | 3.868576117 |
| 5.356258286 | 4.286111242 | 4.856646226 |
| 6.014668999 | 4.080602031 | 3.045352884 |
| 4.027466795 | 3.197036915 | 3.342893823 |
| 4.038289824 | 3.054653554 | 4.225884527 |
| 4.772568741 | 3.497595545 | 3.238763429 |
| 5.944948294 | 3.073214733 | 4.868420322 |
| 3.699147783 | 3.723650239 | 4.015823592 |
| 3.379681167 | 3.839658869 | 4.267831863 |
| 3.50988637  | 3.368109344 | 4.336539774 |
| 5.123561943 | 3.052927241 | 5.076131505 |
| 3.234616112 | 3.085613834 | 3.386046555 |
| 3.841465749 | 3.685862979 | 4.714528706 |
| 4.268841037 | 3.241772348 | 3.570219504 |
| 3.767149375 | 3.931908849 | 3.457501011 |
| 3.399108633 | 2.995476717 | 3.587633266 |
| 6.304066096 | 4.23084559  | 5.70298272  |
| 3.919213901 | 3.640550358 | 3.929647219 |
| 4.394609355 | 4.767369054 | 4.391284792 |
| 3.778237807 | 4.452435415 | 5.501013729 |
| 5.558932891 | 5.750684099 | 3.670389978 |
| 4.272796877 | 2.981284218 | 4.185831507 |
| 5.664688051 | 5.095682299 | 5.30934917  |
| 3.312835644 | 3.851003272 | 2.987292417 |
| 3.43136272  | 3.31719927  | 3.069359574 |
| 3.937786684 | 3.499296044 | 3.576418081 |
| 3.299548233 | 5.371499051 | 3.033095266 |
| 3.685243393 | 3.407613199 | 4.057507476 |
| 3.165518182 | 4.018175023 | 3.289916858 |
| 4.303846968 | 3.117420571 | 3.549610775 |
| 5.53021178  | 3.379823139 | 3.433155079 |
| 4.59302926  | 3.434709207 | 7.487942323 |
| 3.485587054 | 3.944371268 | 4.128558218 |
| 4.222115375 | 3.768223316 | 3.471382918 |
| 3.94146625  | 2.967858301 | 4.27025387  |

|             |             |             |
|-------------|-------------|-------------|
| 3.252891065 | 4.346445853 | 4.323977476 |
| 3.19512853  | 3.126691737 | 3.404220706 |
| 3.459957229 | 3.121256508 | 3.375312623 |
| 3.919081772 | 3.909539935 | 3.062571488 |
| 3.745549005 | 3.035864979 | 4.35905168  |
| 3.617623887 | 3.494466649 | 3.173568871 |
| 4.048223857 | 5.200430344 | 4.665935185 |
| 4.413779648 | 3.851998451 | 3.898844548 |
| 3.748017474 | 3.652342068 | 5.158404773 |
| 4.429854254 | 3.981746394 | 4.031871254 |
| 2.93529206  | 3.189396138 | 3.736338788 |
| 4.024522869 | 4.916165426 | 5.356418022 |
| 4.195175466 | 3.710153117 | 3.950632622 |
| 3.812452875 | 3.080089354 | 3.245911842 |
| 5.052041835 | 3.795627306 | 4.389196803 |
| 3.586806602 | 3.23971155  | 3.209191856 |
| 3.350541289 | 4.028900187 | 4.178720671 |
| 3.01016725  | 3.848198347 | 3.07496981  |
| 4.855792663 | 3.368099833 | 4.845088239 |
| 4.556982578 | 3.092116645 | 3.68382444  |
| 3.096640398 | 3.607622161 | 3.393093873 |
| 4.218864968 | 4.811044716 | 3.693158676 |
| 4.019305393 | 3.491973158 | 3.724920718 |
| 3.793874611 | 3.048802011 | 3.264021408 |
| 3.749143523 | 3.088157697 | 6.044360591 |
| 2.997020534 | 4.096620171 | 3.429213232 |
| 3.958088773 | 3.032971819 | 5.918918535 |
| 4.090522705 | 3.767562121 | 4.095777238 |
| 3.927602895 | 4.059803101 | 3.334352303 |
| 4.107753612 | 3.083167535 | 3.461052731 |
| 4.100234414 | 3.013651322 | 3.658964234 |
| 3.574091807 | 4.380982615 | 2.983321078 |
| 3.936128155 | 3.859220036 | 3.284660108 |
| 4.239410954 | 2.99232086  | 4.119963799 |
| 3.362120192 | 3.50769534  | 3.631965159 |
| 3.217996226 | 2.986259235 | 4.812383511 |
| 3.877360752 | 3.679169649 | 4.11610057  |
| 3.355480891 | 3.661508595 | 3.023227018 |
| 3.030510073 | 4.772270119 | 5.654711003 |
| 3.750385927 | 3.996664741 | 3.501750623 |
| 3.556251564 | 3.808870036 | 3.551874924 |
| 3.266758674 | 3.244736498 | 3.544227155 |
| 4.414160667 | 3.471721009 | 4.331361589 |
| 4.35729756  | 3.868606267 | 4.014046432 |
| 4.083915787 | 3.5080282   | 3.751877431 |
| 3.938581048 | 3.40271811  | 3.289046826 |

|             |             |             |
|-------------|-------------|-------------|
| 3.957638838 | 3.01790647  | 4.202242176 |
| 3.88411986  | 5.748594053 | 3.514464458 |
| 7.069318898 | 3.036934627 | 3.649556584 |
| 4.206105134 | 3.109954392 | 3.966259469 |
| 4.232150168 | 3.351890376 | 3.467996754 |
| 3.083555812 | 4.078649245 | 3.697619764 |
| 5.590833907 | 2.993525213 | 4.925251076 |
| 4.195092994 | 3.588428515 | 3.22673022  |
| 3.507146716 | 3.431382801 | 3.380918692 |
| 3.545451707 | 3.023591375 | 3.941954389 |
| 3.393758181 | 3.192687737 | 3.208854193 |
| 4.199349414 | 3.847793945 | 4.615145809 |
| 5.378842228 | 5.22613471  | 3.027217777 |
| 3.459857269 | 3.108070959 | 3.339256302 |
| 3.959295004 | 2.92381796  | 3.399753947 |
| 3.880791633 | 5.170161127 | 4.844079427 |
| 3.869975373 | 4.019770134 | 2.958037144 |
| 3.653444333 | 3.414012779 | 3.27824469  |
| 4.386873248 | 3.818077011 | 3.047990742 |
| 7.619648143 | 3.119445727 | 5.558959403 |
| 3.259222669 | 4.212924985 | 3.607194341 |
| 5.341099601 | 4.794328098 | 4.313513992 |
| 3.178112707 | 3.648142744 | 3.449414316 |
| 4.449560671 | 2.977412558 | 3.090802287 |
| 4.651420634 | 4.704508553 | 4.02019293  |
| 5.431579016 | 4.40125799  | 3.863503966 |
| 4.28668877  | 4.294070563 | 4.37611501  |
| 4.445994658 | 3.748426246 | 3.368512056 |
| 3.6311405   | 3.144851075 | 3.490876335 |
| 3.363111179 | 3.529507477 | 3.847448065 |
| 5.017699637 | 3.039688458 | 3.22247303  |
| 3.046250141 | 4.570949224 | 4.918097458 |
| 5.083252515 | 3.756135779 | 3.998753462 |
| 4.006227766 | 4.157335343 | 4.015559167 |
| 4.543304662 | 3.281531312 | 4.160937463 |
| 4.157567334 | 3.284298637 | 4.733013662 |
| 3.265000592 | 3.16569029  | 4.4251938   |
| 3.41484745  | 3.418131057 | 3.704060356 |
| 3.774058966 | 3.055309301 | 3.342432999 |
| 4.831026983 | 3.637359464 | 3.454776663 |
| 4.861825046 | 3.104876288 | 4.400089626 |
| 3.445114443 | 4.138720086 | 3.398235359 |
| 4.629168139 | 3.685990267 | 4.07845614  |
| 4.296567406 | 4.474363811 | 8.124360199 |
| 4.667781579 | 4.512202554 | 5.140971593 |
| 4.875273892 | 4.100496598 | 4.337664162 |

|             |             |             |
|-------------|-------------|-------------|
| 5.483464629 | 3.802635337 | 2.96054062  |
| 4.282544162 | 3.350343417 | 4.464212726 |
| 3.808270112 | 3.324994805 | 3.22640609  |
| 4.739398098 | 4.695059966 | 3.028475051 |
| 4.804403355 | 3.06440463  | 3.991316725 |
| 4.480587703 | 2.940877039 | 4.593671845 |
| 4.436676768 | 2.954444799 | 8.244195081 |
| 5.115928146 | 3.187990776 | 3.13615176  |
| 3.255062198 | 3.054310803 | 3.8389942   |
| 2.982047601 | 3.29787348  | 4.117763346 |
| 4.358183119 | 2.933471043 | 3.636266526 |
| 3.006587867 | 3.40185368  | 3.256505075 |
| 3.969471687 | 4.462160737 | 4.367132377 |
| 3.931886561 | 3.102607639 | 3.941032111 |
| 4.880342619 | 5.187782395 | 3.675282967 |
| 4.00129346  | 3.614896638 | 3.221536156 |
| 3.61000876  | 4.000644884 | 3.618879121 |
| 4.217298313 | 4.283382994 | 3.386800696 |
| 4.383420584 | 2.925735719 | 4.065437213 |
| 3.687473712 | 3.314370153 | 4.944718628 |
| 4.410565982 | 4.209898927 | 3.864082918 |
| 3.87070369  | 3.118413039 | 3.86438556  |
| 4.233994668 | 3.40814088  | 4.632267469 |
| 3.83185071  | 2.932075889 | 4.265901753 |
| 4.687603686 | 3.068294703 | 3.827265852 |
| 2.929171201 | 5.14209615  | 5.511181077 |
| 3.640426324 | 3.58959631  | 3.473257186 |
| 5.194725284 | 5.062281213 | 3.070379869 |
| 3.597815992 | 2.938939778 | 3.22789471  |
| 5.060900389 | 3.209067078 | 5.066865229 |
| 4.904399812 | 3.028975723 | 4.313138791 |
| 4.306309555 | 2.986274728 | 4.389787558 |
| 3.964977786 | 3.687377967 | 3.266237976 |
| 5.128279285 | 4.095000873 | 4.788867971 |
| 4.072130653 | 3.255674771 | 3.317314688 |
| 5.045924528 | 4.164833564 | 3.97681319  |
| 3.341483901 | 3.412503028 | 3.263952536 |
| 5.46755045  | 3.103624768 | 3.681176037 |
| 3.130223945 | 3.807447005 | 3.843076641 |
| 3.976484996 | 4.07187191  | 3.055822257 |
| 4.583251724 | 3.181061972 | 4.164852438 |
| 3.160751915 | 2.986262364 | 4.199732368 |
| 3.44491578  | 3.330455648 | 2.893291315 |
| 4.218842434 | 3.08098481  | 5.293005936 |
| 2.875400112 | 5.236220381 | 5.146336775 |
| 4.91185928  | 3.079928176 | 3.941604516 |

|             |             |             |
|-------------|-------------|-------------|
| 3.757469651 | 3.015484675 | 5.272845562 |
| 4.301711239 | 3.079534577 | 3.240677071 |
| 4.201153638 | 3.043801526 | 4.37106877  |
| 4.52476476  | 4.215201647 | 4.309591265 |
| 4.31279666  | 3.530401113 | 4.180392681 |
| 2.973748001 | 3.395827268 | 3.599396716 |
| 3.898068318 | 4.158099619 | 2.997470036 |
| 4.216663081 | 2.948395853 | 4.232176888 |
| 3.096427091 | 4.174438088 | 3.284043669 |
| 4.147630444 | 4.314990792 | 5.170039719 |
| 4.395078338 | 4.090173625 | 3.723802996 |
| 3.066045444 | 3.51119529  | 3.733398197 |
| 3.893240284 | 3.738854485 | 3.986838875 |
| 3.731652513 | 6.473470479 | 6.19033504  |
| 3.965887948 | 3.762697553 | 3.912639486 |
| 5.141624878 | 3.089606966 | 3.561308568 |
| 3.463324392 | 4.19393442  | 3.455308694 |
| 3.892308624 | 2.939144482 | 4.925937994 |
| 3.850477079 | 3.632248846 | 3.154172072 |
| 3.614033721 | 4.319972082 | 7.118225579 |
| 5.054754917 | 7.134237285 | 6.230557398 |
| 3.245589582 | 3.752745569 | 3.789263044 |
| 3.616911313 | 2.962548354 | 3.847172077 |
| 5.566197956 | 5.332481375 | 5.176444679 |
| 4.885107081 | 4.713640835 | 5.514432449 |
| 4.050397026 | 3.037390615 | 3.350399495 |
| 4.482302861 | 2.971651019 | 3.738539411 |
| 3.624292068 | 3.235111512 | 3.332428568 |
| 4.710574813 | 4.209348275 | 4.463666758 |
| 3.528156507 | 3.793776696 | 3.190945546 |
| 4.152463132 | 2.966857617 | 4.030651992 |
| 2.9131081   | 3.395414456 | 5.006844063 |
| 3.900256745 | 3.534306793 | 3.412423373 |
| 4.295274393 | 2.865526589 | 3.433433499 |
| 4.257764621 | 5.590048973 | 3.153266217 |
| 4.28215734  | 3.544823942 | 4.979832101 |
| 3.596795164 | 3.182033173 | 3.088169624 |
| 4.445849353 | 3.187300904 | 3.696496656 |
| 4.283333152 | 3.791135649 | 3.265113518 |
| 4.597364485 | 4.613389193 | 3.203665893 |
| 4.345580057 | 3.569465964 | 3.668739368 |
| 3.105406683 | 3.978776356 | 3.750564349 |
| 3.978170803 | 4.3906722   | 3.680564702 |
| 6.233504684 | 5.253790163 | 3.306017478 |
| 4.41281502  | 3.388677991 | 4.02379447  |
| 3.209316158 | 3.124379419 | 2.914786817 |



|             |             |             |
|-------------|-------------|-------------|
| 3.514648468 | 3.588018672 | 3.518992089 |
| 4.746398759 | 4.474481706 | 4.385898669 |
| 3.363854137 | 3.10974522  | 3.213624977 |
| 3.176622274 | 3.059356075 | 3.81922113  |
| 3.787143649 | 3.915027805 | 3.519690448 |
| 4.766105673 | 3.536094842 | 3.742698556 |
| 3.776754762 | 4.223442837 | 3.527180639 |
| 3.892536141 | 3.143866495 | 3.573646591 |
| 4.87987867  | 3.361153243 | 3.09232013  |
| 3.87155039  | 3.034016985 | 3.425170007 |
| 5.508646708 | 3.134833566 | 4.638940948 |
| 5.263439822 | 4.872898928 | 4.814792851 |
| 4.221293925 | 2.877368297 | 4.634573145 |
| 4.23707709  | 3.286874536 | 5.185787102 |
| 4.674950072 | 3.849575713 | 3.774671734 |
| 4.086414245 | 3.389160707 | 4.131607067 |
| 3.051654857 | 3.478479233 | 3.843165103 |
| 7.730455023 | 3.472732147 | 10.74208978 |
| 3.29226383  | 3.168392005 | 3.530451914 |
| 4.357805739 | 3.076457247 | 4.447765604 |
| 8.023545165 | 4.416152771 | 7.825487871 |
| 2.970283418 | 3.965600551 | 3.266168634 |
| 3.053853407 | 3.207978094 | 2.925929887 |
| 3.877650125 | 3.406918835 | 3.720592699 |
| 3.608409119 | 4.819331791 | 3.252260946 |
| 3.131105031 | 3.042990497 | 3.392203931 |
| 4.405418043 | 3.699566401 | 4.245480065 |
| 3.613804918 | 3.168938592 | 3.012695019 |
| 4.34772742  | 3.463820188 | 2.857615219 |
| 4.226462813 | 2.973898524 | 4.134616011 |
| 2.886574914 | 3.351554203 | 2.974365641 |
| 3.65579376  | 3.621615323 | 3.638684498 |
| 3.898074979 | 4.876142612 | 3.495780231 |
| 5.874535567 | 5.445407588 | 3.280057666 |
| 4.275037983 | 2.866714574 | 6.235858144 |
| 3.754573868 | 4.152622448 | 3.181607094 |
| 3.417287271 | 2.837163684 | 3.608931844 |
| 3.981754543 | 3.21901947  | 3.44892747  |
| 4.718840607 | 2.873140212 | 3.567691504 |
| 3.782554313 | 2.856886689 | 3.56117693  |
| 2.906230113 | 3.846918208 | 4.19410324  |
| 8.958200849 | 3.058834215 | 4.033973205 |
| 3.712926376 | 4.107512682 | 4.822846832 |
| 4.322615199 | 3.045566068 | 4.640709774 |
| 5.191909896 | 3.369697753 | 3.283319513 |
| 4.545602357 | 3.241079458 | 3.183092212 |

|             |             |             |
|-------------|-------------|-------------|
| 3.718503405 | 3.316890856 | 4.451926182 |
| 3.010537926 | 3.449060322 | 3.180699059 |
| 2.93904689  | 4.00449457  | 3.142273721 |
| 4.877066857 | 3.78141683  | 3.890992402 |
| 3.431074774 | 3.536774514 | 3.753836632 |
| 3.993096696 | 3.143577225 | 4.379425265 |
| 2.955420428 | 4.983636988 | 4.084998646 |
| 3.698204339 | 3.380464774 | 3.115228824 |
| 4.986624856 | 4.031912697 | 3.763362268 |
| 4.652498745 | 3.123121185 | 4.065626499 |
| 4.999703916 | 3.300529368 | 2.88523442  |
| 3.758456608 | 3.732720418 | 3.733494659 |
| 3.650449711 | 3.91411125  | 3.733318296 |
| 3.620114281 | 2.991975072 | 4.745042578 |
| 4.284197496 | 3.1688805   | 3.278591886 |
| 3.74944058  | 4.218888539 | 2.887296914 |
| 6.148885118 | 3.160540272 | 4.609957053 |
| 5.167181552 | 5.229536895 | 4.892911843 |
| 4.795919552 | 4.346260117 | 3.98407621  |
| 4.36342389  | 4.059544242 | 3.425014544 |
| 5.227168985 | 2.971530819 | 4.848208907 |
| 4.261492728 | 3.289570541 | 5.129686926 |
| 3.047918941 | 3.51422061  | 4.547508199 |
| 4.600919958 | 7.874108494 | 4.587285552 |
| 4.196637127 | 2.898944899 | 3.013869288 |
| 4.157412719 | 3.898131762 | 2.901452377 |
| 3.407214026 | 4.030601982 | 2.884999119 |
| 5.471309461 | 3.646621976 | 4.09912611  |
| 3.182582157 | 3.696609969 | 4.365922022 |
| 4.259455102 | 6.876231849 | 2.856653684 |
| 3.150334804 | 3.007459948 | 3.470110013 |
| 3.931854208 | 3.567382427 | 4.494894588 |
| 4.612532612 | 3.691813114 | 2.920100026 |
| 3.657550581 | 3.832620096 | 3.893078745 |
| 3.120160149 | 3.853030073 | 3.58939217  |
| 3.18945233  | 3.915379171 | 2.966325426 |
| 3.821695794 | 3.684941799 | 3.00458407  |
| 4.077884326 | 2.956473627 | 4.492408611 |
| 4.317815471 | 3.989069751 | 3.968361621 |
| 4.131475189 | 3.443042283 | 5.13141682  |
| 4.871646607 | 4.30953007  | 3.402596494 |
| 4.472861767 | 3.294855382 | 4.680804333 |
| 3.878014157 | 3.377026645 | 3.90077606  |
| 4.54708114  | 2.964648109 | 4.201052809 |
| 4.562618882 | 3.690838191 | 3.285703399 |
| 2.843857572 | 3.271746442 | 3.380325637 |

|             |             |             |
|-------------|-------------|-------------|
| 3.653237442 | 3.454705324 | 2.839020477 |
| 4.555414539 | 4.332418246 | 3.366641217 |
| 3.275800284 | 3.33448547  | 3.660963771 |
| 3.370582619 | 3.873085449 | 3.992739839 |
| 3.310593217 | 3.95227577  | 3.873878058 |
| 3.774499539 | 3.035919453 | 5.046819699 |
| 3.405264891 | 3.079634599 | 3.390506677 |
| 2.776819879 | 3.437509843 | 3.74062905  |
| 3.185570044 | 2.792538715 | 3.19604852  |
| 3.843679193 | 3.551053474 | 3.716065854 |
| 5.500028031 | 3.528439639 | 4.527312965 |
| 3.110086333 | 3.098173227 | 2.856706203 |
| 3.130570899 | 2.947955297 | 3.095956345 |
| 4.601792953 | 3.750472737 | 4.790912826 |
| 6.716982624 | 3.521841993 | 3.490133285 |
| 4.487932133 | 3.049336231 | 3.896611063 |
| 3.678953329 | 2.897002466 | 4.724972367 |
| 4.323547663 | 4.006721361 | 5.084688239 |
| 3.659795308 | 3.30166108  | 3.785971044 |
| 3.395250737 | 3.360221113 | 3.251865087 |
| 5.400611412 | 4.105699959 | 3.557995683 |
| 3.775049674 | 3.025204918 | 3.630955387 |
| 4.382701745 | 5.261408985 | 4.718173724 |
| 4.210815278 | 3.040483927 | 3.20980446  |
| 5.068749015 | 4.151309316 | 4.043098697 |
| 3.565608705 | 3.875775211 | 3.764055632 |
| 3.379729181 | 3.95913498  | 3.191141531 |
| 4.47880197  | 2.813678791 | 3.070385797 |
| 2.807787365 | 3.42425993  | 3.553771734 |
| 4.798844941 | 3.876072596 | 4.81283606  |
| 3.691791699 | 2.906214658 | 4.542461025 |
| 3.290176861 | 2.878508234 | 3.535827162 |
| 4.74896974  | 3.4719064   | 2.964865422 |
| 4.110144358 | 3.298240261 | 2.885634261 |
| 5.165682129 | 3.239805    | 6.884530877 |
| 3.696139525 | 3.072988471 | 3.816968486 |
| 4.154445769 | 4.440547137 | 4.984501613 |
| 4.364829105 | 2.80838269  | 3.128688069 |
| 3.811361169 | 4.223791532 | 4.163160495 |
| 3.777650421 | 3.810052597 | 3.627084636 |
| 4.196114391 | 3.099191012 | 2.999652055 |
| 5.459198389 | 4.973974248 | 2.787912946 |
| 4.678321402 | 4.203860284 | 4.034901022 |
| 3.63603452  | 3.658631108 | 4.166825312 |
| 4.699148004 | 2.821835257 | 3.75613791  |
| 3.328954477 | 4.231173361 | 3.407320741 |

|             |             |             |
|-------------|-------------|-------------|
| 4.579235393 | 2.904316474 | 3.878742511 |
| 4.067673765 | 3.352716036 | 4.026309557 |
| 4.695228467 | 2.800735011 | 4.538790225 |
| 4.854509268 | 3.757317106 | 3.467167344 |
| 3.461238863 | 3.394123712 | 4.274537116 |
| 5.992191953 | 3.990737133 | 4.860112512 |
| 2.952128019 | 2.976460435 | 3.390213077 |
| 4.057368832 | 2.824249274 | 2.971141425 |
| 2.848446027 | 3.697465059 | 3.070350555 |
| 3.74096568  | 3.07727803  | 3.904493797 |
| 4.419200186 | 3.317711626 | 3.10638717  |
| 3.554220495 | 3.887313283 | 4.31828363  |
| 3.582469044 | 2.914398676 | 4.393383954 |
| 3.528956108 | 3.079833864 | 2.854903637 |
| 3.605392445 | 3.113084528 | 4.179550619 |
| 3.373873213 | 3.598780552 | 3.307402744 |
| 4.277038279 | 2.785660625 | 4.014848552 |
| 2.815105354 | 3.822233413 | 4.180034535 |
| 3.491918008 | 3.093437795 | 3.323991599 |
| 3.387760508 | 5.034808888 | 4.606181792 |
| 2.775616936 | 3.194483914 | 3.745712646 |
| 2.780106765 | 2.910724319 | 3.232511188 |
| 4.480408174 | 3.517868832 | 4.249879634 |
| 3.536345839 | 3.38281734  | 3.180735629 |
| 4.354103242 | 2.771806721 | 5.001818323 |
| 4.074595588 | 2.863784543 | 3.434936972 |
| 2.873520414 | 3.125377378 | 4.705519467 |
| 3.190463082 | 2.947456707 | 3.022570426 |
| 7.70465103  | 5.319385593 | 6.245482782 |
| 5.009782559 | 2.835403908 | 2.915444376 |
| 4.567856382 | 2.861552122 | 3.486310429 |
| 2.771792904 | 4.086303972 | 3.483217081 |
| 3.674007997 | 3.772700354 | 2.931705187 |
| 2.803678806 | 4.818446312 | 5.012319321 |
| 3.284616151 | 3.113751329 | 3.029632719 |
| 3.913215633 | 2.97899416  | 4.369011597 |
| 3.195260681 | 4.544598428 | 4.316013853 |
| 3.54068203  | 3.911977346 | 3.317215404 |
| 3.341664858 | 2.812909059 | 5.33482307  |
| 4.826183164 | 3.855833359 | 2.809056852 |
| 2.786296056 | 3.048760472 | 2.937451387 |
| 3.053240897 | 3.062845677 | 3.25020367  |
| 4.487642398 | 4.12775506  | 3.059849087 |
| 4.170386478 | 3.340953108 | 3.524594669 |
| 3.590954247 | 3.49097823  | 3.274309006 |
| 3.836139449 | 2.863503634 | 3.771989652 |

|             |             |             |
|-------------|-------------|-------------|
| 3.762113427 | 3.40195791  | 2.974289746 |
| 3.708845158 | 3.509341473 | 3.712751238 |
| 5.338371694 | 4.769563778 | 2.859206612 |
| 3.804447551 | 2.862684763 | 3.857964187 |
| 3.255408849 | 3.516467748 | 3.16826283  |
| 4.238813249 | 3.709374211 | 4.194794953 |
| 3.299782985 | 3.026727424 | 3.922498897 |
| 3.645746902 | 3.836093407 | 3.197397478 |
| 4.058743899 | 4.106359518 | 4.064596857 |
| 3.353585405 | 4.650472079 | 5.084408651 |
| 4.109606352 | 2.935609712 | 3.183697113 |
| 3.689691962 | 3.072652232 | 4.021194131 |
| 3.903245539 | 2.804107706 | 4.458758007 |
| 6.042683936 | 6.220917443 | 4.411659415 |
| 4.7286907   | 3.387709724 | 3.93116759  |
| 3.422554009 | 2.86549295  | 3.42176133  |
| 3.063352834 | 3.698280564 | 3.093923732 |
| 3.557508385 | 4.174053269 | 3.192753904 |
| 6.019734694 | 5.584186341 | 3.114049208 |
| 3.030918615 | 2.926777166 | 3.318147839 |
| 4.104757033 | 3.079335869 | 3.91635065  |
| 4.162210342 | 4.840707393 | 4.741050689 |
| 3.526145312 | 3.674453388 | 2.91328218  |
| 3.674750617 | 3.851001041 | 3.939244725 |
| 5.184849032 | 4.076955749 | 2.866948354 |
| 4.101603188 | 2.776867209 | 3.624306032 |
| 2.94958523  | 2.951013743 | 3.301383085 |
| 3.808718154 | 4.134555393 | 4.027234813 |
| 3.084569568 | 2.997506487 | 4.404281619 |
| 7.594443812 | 4.301331579 | 3.814491424 |
| 3.389746784 | 3.241193209 | 3.344674051 |
| 6.674515755 | 2.805313868 | 6.819447938 |
| 3.018610624 | 3.030527417 | 4.755529725 |
| 5.730331284 | 3.523499376 | 3.207490796 |
| 3.209979699 | 2.83500899  | 4.078649315 |
| 3.250721169 | 3.747494282 | 3.230000865 |
| 3.470988756 | 3.481074312 | 2.767546518 |
| 2.902398999 | 3.504162837 | 3.012561754 |
| 4.262032442 | 3.125038227 | 4.084852542 |
| 5.311561061 | 5.00752555  | 4.913521429 |
| 4.774570146 | 3.826617219 | 2.88850039  |
| 3.983648392 | 2.713685179 | 3.313811156 |
| 3.297131643 | 3.718745493 | 3.45140749  |
| 2.817275604 | 7.329067271 | 6.24967072  |
| 4.035946827 | 4.303682482 | 5.901752827 |
| 3.236204808 | 2.777010491 | 4.581856626 |

|             |             |             |
|-------------|-------------|-------------|
| 4.442491994 | 2.785977533 | 3.586888676 |
| 3.134547844 | 4.271211105 | 3.404835585 |
| 3.765650564 | 4.251456573 | 3.500076251 |
| 3.48893099  | 2.967062093 | 2.761479238 |
| 5.206768116 | 4.040249734 | 4.808134872 |
| 3.362163819 | 4.290312357 | 2.852764409 |
| 3.785571004 | 3.907728214 | 4.152692308 |
| 5.413268074 | 3.389727999 | 3.212761717 |
| 4.263231411 | 2.861208079 | 4.14215733  |
| 7.519267773 | 2.88597275  | 8.18691005  |
| 3.492770551 | 3.552155689 | 3.234753399 |
| 2.942837831 | 3.436287499 | 3.194845158 |
| 4.605306966 | 3.35775045  | 5.300533652 |
| 3.925845317 | 3.888547045 | 2.926150635 |
| 3.087061896 | 2.772251138 | 3.588500832 |
| 3.822730307 | 3.117701486 | 3.956446965 |
| 3.453722663 | 3.24991587  | 3.128030186 |
| 4.087022512 | 2.780085846 | 3.079852107 |
| 5.225534105 | 4.005030575 | 2.801212213 |
| 4.57005598  | 3.837890595 | 3.405285433 |
| 3.185771143 | 3.003044597 | 3.014392135 |
| 4.786774692 | 3.742909693 | 3.830371329 |
| 3.551032781 | 3.715070099 | 3.040871952 |
| 3.237059327 | 2.960836237 | 3.581191905 |
| 4.015332152 | 2.893665451 | 2.851524013 |
| 3.114623775 | 3.702292936 | 2.912908639 |
| 2.795159358 | 3.588222639 | 4.171511032 |
| 4.265173206 | 4.170792274 | 3.775903929 |
| 4.436851547 | 4.092083843 | 4.776560489 |
| 5.693750295 | 2.88654674  | 5.783939134 |
| 4.219107023 | 2.848740488 | 3.986370167 |
| 3.80651149  | 5.066671945 | 4.175890815 |
| 2.905783938 | 3.919182543 | 3.191377279 |
| 3.964978213 | 3.205904192 | 4.502798227 |
| 4.128489974 | 2.988709442 | 4.274489367 |
| 6.025726345 | 3.308123842 | 2.745055178 |
| 3.178143713 | 2.932687356 | 3.5743903   |
| 3.010646685 | 3.039580406 | 3.030600837 |
| 4.619056084 | 4.857230433 | 4.490843886 |
| 4.026929457 | 3.443888084 | 4.109434356 |
| 3.959617142 | 2.948515273 | 3.651108085 |
| 4.656319605 | 2.738775354 | 4.365055615 |
| 3.705009202 | 3.085360665 | 3.310002848 |
| 3.857717343 | 2.904754636 | 3.408927918 |
| 4.169934434 | 2.890596716 | 4.468746797 |
| 4.289529347 | 4.624823211 | 2.949275482 |

|             |             |             |
|-------------|-------------|-------------|
| 3.36016915  | 2.789226334 | 3.343291292 |
| 4.303122162 | 5.148371736 | 3.799354816 |
| 3.720048855 | 2.846402315 | 4.031527944 |
| 3.879431504 | 4.279952044 | 4.195639174 |
| 4.13102343  | 3.363945544 | 3.310262508 |
| 3.867932854 | 3.379277891 | 2.947973294 |
| 3.036758877 | 3.489259426 | 3.256064511 |
| 3.673933921 | 2.912709909 | 2.899508879 |
| 6.725531588 | 3.757966312 | 3.091971969 |
| 3.708547316 | 4.675685206 | 4.223296226 |
| 3.117111757 | 3.347960117 | 2.730580443 |
| 2.72632254  | 3.313139393 | 2.879491044 |
| 4.743274672 | 4.70479126  | 2.765601516 |
| 3.58361006  | 2.783309855 | 3.482703617 |
| 4.11618523  | 3.614014723 | 4.530134015 |
| 4.107622449 | 2.735173944 | 3.865437991 |
| 3.769144822 | 3.506240499 | 4.12168843  |
| 2.802672529 | 3.412396899 | 3.743745362 |
| 3.477771808 | 3.209281322 | 4.09033611  |
| 4.220342898 | 4.904454598 | 3.274986553 |
| 4.933176812 | 6.599038461 | 4.407797256 |
| 3.775780117 | 3.223338109 | 2.902893724 |
| 3.260012605 | 3.423039199 | 3.50671926  |
| 2.797019272 | 2.81318811  | 5.864502062 |
| 3.700242998 | 2.928994561 | 3.682562853 |
| 4.355260279 | 2.682026419 | 4.632701916 |
| 2.888378488 | 2.991134041 | 2.78928605  |
| 3.958228632 | 3.213773606 | 3.158530737 |
| 5.047462763 | 3.21246405  | 3.55169288  |
| 3.819865525 | 3.577853992 | 2.772799446 |
| 3.364587102 | 3.50751655  | 3.091256969 |
| 3.205118263 | 2.855273227 | 3.923621147 |
| 5.576590353 | 3.195896129 | 2.865766091 |
| 4.606661441 | 6.201153639 | 3.716976454 |
| 4.251724372 | 3.661084756 | 4.13536345  |
| 3.408764333 | 3.74594587  | 3.27450442  |
| 2.804348347 | 4.519169246 | 3.556529827 |
| 4.039560323 | 2.895865836 | 3.41298581  |
| 3.699977175 | 4.274588222 | 4.126796772 |
| 4.341911967 | 3.599681521 | 3.674291968 |
| 3.783156689 | 4.203817855 | 3.809079488 |
| 4.943374065 | 4.183626056 | 4.432104422 |
| 4.889484546 | 5.093779836 | 4.461660938 |
| 2.861899827 | 5.335255544 | 4.245440526 |
| 4.505779842 | 2.698438094 | 4.937619104 |
| 3.717904415 | 2.792916854 | 4.338988406 |

|             |             |             |
|-------------|-------------|-------------|
| 2.949016731 | 2.875254239 | 3.178467499 |
| 4.122568183 | 4.076326648 | 2.680376553 |
| 4.68667565  | 4.172264742 | 3.848431971 |
| 3.759933129 | 4.132496325 | 2.935638381 |
| 3.926210539 | 4.612537258 | 2.791881705 |
| 3.115521027 | 3.147199815 | 2.936710706 |
| 3.675202428 | 4.068266959 | 3.368480533 |
| 2.714803365 | 3.69332011  | 4.396803797 |
| 4.562291073 | 2.871055557 | 4.098043497 |
| 2.834666449 | 3.409637395 | 3.725677699 |
| 3.695482909 | 2.83681756  | 3.250403984 |
| 3.3309604   | 3.001372478 | 2.864910128 |
| 4.563436545 | 2.711642494 | 3.445304592 |
| 4.00965078  | 2.797367024 | 3.672774097 |
| 3.485971438 | 3.1377059   | 3.126072793 |
| 3.63579866  | 3.13323101  | 2.651463585 |
| 3.219291129 | 2.685321412 | 3.900163939 |
| 4.145264068 | 3.068441412 | 2.663788321 |
| 4.013103114 | 3.008231477 | 6.411014367 |
| 3.554772901 | 3.82343024  | 3.85171748  |
| 4.4332593   | 3.061512207 | 3.754376852 |
| 4.107190734 | 3.143061042 | 3.163853544 |
| 3.083409572 | 3.3021199   | 4.928948192 |
| 5.772799282 | 4.319159548 | 4.346207932 |
| 3.223334388 | 3.982126975 | 3.748329915 |
| 4.094948022 | 2.689316623 | 3.927624278 |
| 4.76607022  | 3.83046726  | 4.979856231 |
| 3.118817047 | 2.986880828 | 2.658363574 |
| 5.464871083 | 4.71381961  | 5.96243802  |
| 3.39435197  | 3.861700802 | 4.574097521 |
| 3.28089664  | 3.261080249 | 3.491261222 |
| 3.206592551 | 4.276298828 | 2.699821612 |
| 3.426714081 | 3.033830918 | 2.874552707 |
| 3.779058725 | 4.408378605 | 4.442617284 |
| 3.01012492  | 2.915740697 | 2.758827402 |
| 4.211465922 | 3.021282272 | 3.863045857 |
| 5.272517052 | 4.043170239 | 4.801169046 |
| 2.755540568 | 4.94511332  | 3.936541557 |
| 3.42671062  | 3.000294886 | 3.520765788 |
| 4.133751257 | 3.964733006 | 3.220904546 |
| 3.908050187 | 3.124139314 | 3.753699684 |
| 3.203003145 | 3.953341452 | 4.137239067 |
| 4.472866111 | 4.002715415 | 4.475650038 |
| 5.388980239 | 3.455169933 | 4.956455127 |
| 3.85235642  | 2.86532225  | 3.146231468 |
| 2.636202938 | 4.332214599 | 4.071449849 |



|             |             |             |
|-------------|-------------|-------------|
| 2.766950818 | 5.016543198 | 3.915448372 |
| 4.171065489 | 3.842329747 | 3.019706008 |
| 3.60356502  | 2.899005147 | 3.621057324 |
| 3.847668256 | 2.815016537 | 3.029071222 |
| 3.123713422 | 6.506898867 | 4.177069088 |
| 4.715932048 | 3.004041911 | 2.746123571 |
| 2.920441136 | 4.435578927 | 4.26234968  |
| 3.897533261 | 3.254364701 | 2.723703341 |
| 2.687169484 | 4.509638705 | 5.232907242 |
| 4.061819713 | 2.780464755 | 3.387481397 |
| 4.506387222 | 2.671861188 | 4.732793838 |
| 2.682182736 | 6.715086661 | 4.412153188 |
| 3.882365976 | 3.833631675 | 2.920978906 |
| 3.186337495 | 2.664572319 | 3.240767817 |
| 4.055004456 | 3.546867098 | 2.659491685 |
| 3.118231925 | 2.770234892 | 3.815925992 |
| 3.554782658 | 2.954742947 | 3.92283517  |
| 2.66251196  | 3.528698924 | 3.978926227 |
| 3.647557461 | 4.224971232 | 4.231194206 |
| 3.748243774 | 3.783509992 | 3.705195839 |
| 3.122131214 | 2.922916066 | 3.259256634 |
| 4.470519389 | 3.519018393 | 4.449478334 |
| 7.929208769 | 3.65852558  | 2.911897743 |
| 4.000976646 | 3.221336934 | 4.721663812 |
| 4.767296455 | 4.502872866 | 4.12348888  |
| 5.042335687 | 3.266930371 | 4.213663971 |
| 4.237373528 | 4.894585773 | 4.225967442 |
| 2.82692485  | 4.111623034 | 3.58079431  |
| 2.762288132 | 3.724238593 | 3.624496912 |
| 2.8031399   | 2.95829285  | 3.883534513 |
| 5.478652755 | 3.997052496 | 5.279108891 |
| 3.612451924 | 3.502435097 | 3.630480159 |
| 3.212670295 | 3.806839135 | 4.333873847 |
| 3.673523922 | 2.996301876 | 2.831166373 |
| 2.923732496 | 4.328987753 | 2.947199106 |
| 2.627061933 | 2.954680231 | 3.310991265 |
| 3.787309251 | 3.500831723 | 3.448121211 |
| 4.17834694  | 4.178433593 | 5.200462339 |
| 3.942171287 | 4.9348538   | 3.511771344 |
| 3.913854385 | 3.365601641 | 2.912200464 |
| 3.851717773 | 3.027144194 | 3.392274639 |
| 3.939357301 | 3.117340332 | 2.890426911 |
| 3.406955502 | 4.034862947 | 2.591776882 |
| 2.787176021 | 2.831381178 | 3.460234623 |
| 2.944668653 | 5.488304729 | 5.798420713 |
| 2.944098973 | 3.745800464 | 3.040948098 |

|             |             |             |
|-------------|-------------|-------------|
| 2.647670388 | 3.117790792 | 2.993790946 |
| 5.215380307 | 2.859987405 | 3.604465992 |
| 3.588650297 | 2.633391161 | 3.752236476 |
| 5.544433475 | 5.132582099 | 5.462110265 |
| 4.027251122 | 3.865732867 | 3.407862447 |
| 2.712120297 | 3.619432849 | 2.711567905 |
| 4.171892593 | 3.911115447 | 4.002181004 |
| 2.791993847 | 3.33743863  | 4.333941106 |
| 4.786385463 | 3.675470273 | 4.00771362  |
| 7.484338872 | 4.680913471 | 5.970735836 |
| 4.824598653 | 3.85230419  | 4.49757747  |
| 5.331392212 | 4.174935    | 5.921091647 |
| 3.299822424 | 2.795720216 | 3.734385113 |
| 3.055402945 | 3.105089671 | 3.467984547 |
| 3.8923031   | 3.805391895 | 3.660452737 |
| 3.536687853 | 2.664468159 | 3.202697637 |
| 4.573131734 | 3.085877982 | 2.699961584 |
| 4.245775134 | 2.780161636 | 3.849051029 |
| 3.267679028 | 2.66481267  | 3.071972    |
| 3.779447485 | 3.471735509 | 3.379819435 |
| 4.591947276 | 5.010497157 | 4.210618353 |
| 4.483994248 | 2.591049623 | 3.488844549 |
| 2.613511919 | 3.371708425 | 5.130763087 |
| 5.81581603  | 2.963143686 | 4.499024741 |
| 3.511250915 | 2.58347105  | 2.990366941 |
| 3.427295951 | 2.617706274 | 3.184000233 |
| 3.916753292 | 2.681270851 | 3.428709504 |
| 3.211992476 | 2.786986731 | 2.695441986 |
| 4.098951956 | 3.76146154  | 3.984257699 |
| 4.281768388 | 2.586687854 | 3.991920557 |
| 4.705887601 | 4.017561688 | 4.386882646 |
| 3.671067195 | 2.867830763 | 3.314175741 |
| 4.068907628 | 3.222263428 | 3.770806522 |
| 2.740342155 | 3.362069388 | 4.757065289 |
| 3.702528101 | 2.699470335 | 4.846996662 |
| 4.595709553 | 3.855760866 | 3.957808659 |
| 4.302860933 | 3.474135448 | 4.295365389 |
| 2.895548106 | 3.421098557 | 4.064119436 |
| 4.123087279 | 2.61678745  | 3.464449489 |
| 2.96482142  | 2.883909874 | 3.817775083 |
| 3.59109349  | 2.606798971 | 3.591841597 |
| 5.316985756 | 2.633045142 | 3.461231592 |
| 3.871355963 | 3.2063156   | 2.976537681 |
| 4.130041683 | 5.270813132 | 3.884637443 |
| 4.724749203 | 2.743077636 | 8.102261892 |
| 2.96845869  | 3.136057844 | 2.792768526 |

|             |             |             |
|-------------|-------------|-------------|
| 2.70385738  | 4.3264106   | 6.037702352 |
| 3.960465676 | 2.662973073 | 3.159095345 |
| 4.46475947  | 4.576972312 | 4.677537768 |
| 3.331424421 | 2.964901532 | 2.864680967 |
| 2.987349155 | 4.581120012 | 5.494819897 |
| 2.605785301 | 3.413450496 | 3.547534071 |
| 3.305189371 | 3.012594418 | 2.726785579 |
| 3.563982876 | 2.770486184 | 3.919009935 |
| 3.320114754 | 2.695568322 | 3.893906509 |
| 4.455487102 | 2.600271768 | 4.583954786 |
| 2.818870486 | 3.79894685  | 3.868764601 |
| 3.35904719  | 2.80045826  | 3.454280054 |
| 2.798843774 | 2.971975759 | 2.616195955 |
| 3.355328431 | 3.40044374  | 3.042190134 |
| 4.573468354 | 2.651923387 | 3.635991146 |
| 3.517272991 | 3.597585443 | 3.989002156 |
| 4.204475812 | 3.780694601 | 2.872576074 |
| 3.417954374 | 2.632251498 | 3.995408622 |
| 3.334587437 | 2.772750332 | 3.476974654 |
| 3.539122778 | 3.434109754 | 2.642103879 |
| 3.881696021 | 2.593030683 | 3.461607747 |
| 3.407299226 | 3.79512408  | 2.828692058 |
| 3.855860894 | 3.222967491 | 4.875590247 |
| 3.33635456  | 2.585071389 | 3.668395324 |
| 4.485001325 | 2.631117116 | 4.004767635 |
| 3.86078208  | 3.984261647 | 2.879606548 |
| 3.779148806 | 3.640399318 | 4.565475752 |
| 5.230158581 | 2.887134928 | 4.317638957 |
| 2.846807438 | 3.143106084 | 2.638456207 |
| 3.013913039 | 3.582162542 | 2.623062074 |
| 5.268753028 | 3.850226749 | 2.953901207 |
| 2.772913377 | 3.837529111 | 4.02500292  |
| 3.469101947 | 4.355865689 | 3.930807767 |
| 2.631157611 | 3.415565167 | 3.807864923 |
| 3.89958132  | 3.22707617  | 2.578090736 |
| 3.181307868 | 2.893859062 | 3.049842769 |
| 3.572003716 | 3.458965407 | 3.265828968 |
| 4.821839884 | 2.952187965 | 3.260394258 |
| 3.172429448 | 3.484389733 | 3.364505327 |
| 2.952160537 | 2.669488921 | 2.630232894 |
| 2.995621871 | 3.079364054 | 3.19756589  |
| 4.085993939 | 3.195986448 | 2.974195923 |
| 4.172256388 | 4.564256149 | 4.869974076 |
| 3.315638816 | 2.914858794 | 3.799760657 |
| 3.548568365 | 3.985285902 | 4.248668976 |
| 3.4211332   | 2.902157393 | 4.127308009 |

|             |             |             |
|-------------|-------------|-------------|
| 3.924043384 | 3.047842644 | 3.517889439 |
| 5.650366778 | 3.597253934 | 3.64124754  |
| 2.971200982 | 7.8294043   | 7.77288256  |
| 2.919930913 | 2.654096741 | 2.756910748 |
| 4.203185891 | 3.491466434 | 2.621980558 |
| 2.717610069 | 3.035149672 | 4.118570893 |
| 5.533537527 | 6.044137943 | 5.597992859 |
| 2.566880939 | 4.130157762 | 4.756927432 |
| 7.257118299 | 3.811301846 | 2.703507583 |
| 2.727241765 | 3.700223937 | 3.196827114 |
| 3.500780897 | 2.773654621 | 2.639958673 |
| 4.150613907 | 2.543330384 | 4.420107261 |
| 2.613458246 | 3.606024006 | 4.252587289 |
| 3.45185948  | 2.892510996 | 3.393003106 |
| 6.107896214 | 2.807867025 | 2.657701307 |
| 3.416998925 | 2.618219269 | 4.181162346 |
| 4.477025289 | 2.760399488 | 3.892783142 |
| 3.181253581 | 2.564682473 | 4.094450287 |
| 3.852882499 | 4.220338063 | 2.90956395  |
| 3.624709179 | 2.844289855 | 2.859122935 |
| 4.732821679 | 2.908273699 | 3.301103268 |
| 5.324529112 | 2.768161373 | 3.36521046  |
| 2.777773788 | 4.251622094 | 2.961261089 |
| 2.72439747  | 3.492161937 | 3.71258647  |
| 3.733021759 | 2.903160501 | 3.413088073 |
| 4.072059754 | 4.649414434 | 2.554049505 |
| 3.480580618 | 4.080276173 | 4.113524203 |
| 3.904221539 | 4.707047328 | 3.353022902 |
| 3.413270706 | 4.657753784 | 3.628383015 |
| 5.133232623 | 3.364864603 | 3.260357738 |
| 3.852498989 | 4.432674146 | 2.709321821 |
| 2.857768942 | 3.597182373 | 5.388232344 |
| 2.558742663 | 3.85125634  | 4.602209367 |
| 2.787548229 | 2.70197518  | 4.403478567 |
| 2.729741967 | 3.297682792 | 2.631393052 |
| 4.516393262 | 2.799522663 | 4.319714095 |
| 2.948303048 | 3.039080087 | 4.702194857 |
| 2.928257288 | 3.719467047 | 3.463475504 |
| 3.347008675 | 2.85951822  | 3.373310913 |
| 4.05470783  | 2.908391572 | 2.837117258 |
| 4.315841041 | 3.692171769 | 3.418299025 |
| 3.823530475 | 2.762591674 | 3.484681562 |
| 4.662004103 | 5.327429045 | 2.58309131  |
| 4.356499233 | 2.724399283 | 6.063333272 |
| 4.791199431 | 2.549059934 | 2.707505172 |
| 2.674212467 | 2.555387456 | 2.971569242 |

|             |             |             |
|-------------|-------------|-------------|
| 3.281517825 | 2.882100492 | 4.051445536 |
| 3.813423654 | 3.028223014 | 3.173033638 |
| 4.705066841 | 3.893328084 | 4.349970497 |
| 3.570748046 | 3.12020714  | 4.496876875 |
| 3.998018701 | 3.823368135 | 4.482188436 |
| 4.6912327   | 4.202590038 | 4.036586313 |
| 4.588137756 | 3.854353042 | 4.170912294 |
| 3.473492247 | 2.797593825 | 4.500318027 |
| 3.026215289 | 2.896090341 | 2.710033729 |
| 2.624501115 | 2.853153071 | 3.864914399 |
| 4.271377044 | 2.668222065 | 2.984085536 |
| 4.935495674 | 2.751144592 | 2.747257166 |
| 2.945974525 | 3.147388658 | 3.303892905 |
| 3.957936001 | 3.251073062 | 4.250381227 |
| 3.450444405 | 2.605958763 | 5.286884972 |
| 2.967947759 | 4.00177964  | 5.08784247  |
| 3.855893254 | 3.535850578 | 2.845239622 |
| 3.57644173  | 3.122911417 | 2.827168667 |
| 4.398246895 | 4.611680092 | 4.650236013 |
| 5.454625152 | 3.021308782 | 3.240703425 |
| 3.147647655 | 4.519163019 | 5.414744813 |
| 2.633980699 | 3.178492559 | 4.11491024  |
| 3.867769357 | 3.534806981 | 2.638468112 |
| 4.353929617 | 3.244437168 | 2.907403978 |
| 3.128625128 | 2.939341409 | 2.71868434  |
| 4.963445635 | 4.930903183 | 5.853105209 |
| 4.167669488 | 3.500143107 | 2.558774781 |
| 6.039974365 | 4.365277189 | 3.070439875 |
| 3.316062762 | 4.033605276 | 3.292584777 |
| 4.567907511 | 4.221822476 | 3.735333015 |
| 3.563837704 | 4.304591298 | 3.33133337  |
| 2.76193386  | 3.015961252 | 4.435140411 |
| 4.608722964 | 2.516222167 | 3.463043033 |
| 7.027204284 | 7.632217116 | 2.601408937 |
| 3.461228245 | 2.59568476  | 4.427415284 |
| 4.1815173   | 3.06512199  | 3.743603709 |
| 4.857840785 | 3.395185092 | 2.796111298 |
| 4.09465489  | 3.713943789 | 2.717853851 |
| 3.889881947 | 3.128129986 | 4.023260951 |
| 3.517802881 | 3.506560839 | 2.959151608 |
| 3.331210928 | 3.058966525 | 3.497551016 |
| 3.660782077 | 3.278608515 | 3.55602803  |
| 3.314567184 | 3.078055153 | 2.490675013 |
| 2.654189311 | 4.700518913 | 5.123012624 |
| 3.491997469 | 2.53451412  | 3.37101215  |
| 2.925179931 | 4.743422788 | 4.509057215 |

|             |             |             |
|-------------|-------------|-------------|
| 3.904440878 | 2.776200128 | 4.335845413 |
| 3.486168677 | 3.068238222 | 3.051540704 |
| 3.358073583 | 2.679372215 | 4.511575642 |
| 3.716050401 | 2.718570943 | 2.992658693 |
| 2.706089613 | 2.958022651 | 4.072927259 |
| 3.526571426 | 3.311440856 | 3.545951267 |
| 2.556546729 | 2.5400066   | 2.608678819 |
| 2.591163041 | 4.296406331 | 4.427607244 |
| 4.586777154 | 3.096129221 | 3.301577597 |
| 4.678755215 | 3.11461974  | 3.913428823 |
| 3.078507914 | 2.64933751  | 3.012755012 |
| 7.050001399 | 3.832127703 | 2.572275044 |
| 5.141900501 | 4.062024974 | 2.72085314  |
| 2.99905441  | 2.603107733 | 3.721103432 |
| 4.178093848 | 5.967424671 | 2.72482582  |
| 3.126268321 | 3.619751071 | 3.621334291 |
| 3.615210912 | 3.041418364 | 2.643589948 |
| 3.125852738 | 2.544020468 | 4.271204146 |
| 3.60415765  | 2.56029561  | 2.628275643 |
| 4.364561931 | 3.746021542 | 4.148388468 |
| 4.366288425 | 2.503568816 | 3.800424696 |
| 4.418471959 | 2.480121446 | 3.833655081 |
| 4.802379696 | 3.487813019 | 4.447253983 |
| 3.983182679 | 5.163126608 | 5.381737084 |
| 3.63561562  | 4.096829141 | 5.184041209 |
| 3.104503245 | 5.784788269 | 5.144101175 |
| 3.884212621 | 3.208577421 | 4.792002147 |
| 3.357639371 | 2.631716056 | 2.927513544 |
| 4.448272803 | 4.688498023 | 3.658619629 |
| 3.57412443  | 3.584199113 | 4.347729682 |
| 3.001942973 | 3.014427771 | 2.783970974 |
| 2.922503607 | 3.334612937 | 4.025793906 |
| 3.192497545 | 2.67343722  | 2.760002461 |
| 4.027222413 | 2.979599779 | 2.689932822 |
| 4.311415117 | 3.108898216 | 4.034431606 |
| 3.581806369 | 2.583182873 | 3.409868317 |
| 3.415833143 | 4.450378091 | 4.190974157 |
| 3.899425358 | 2.633955141 | 3.832683536 |
| 3.306718879 | 3.107052608 | 4.978051544 |
| 4.116071533 | 2.639557939 | 2.850356024 |
| 3.768066137 | 3.188595075 | 2.998936818 |
| 6.559532578 | 6.253852138 | 6.331727001 |
| 3.365401844 | 3.922520798 | 3.194520637 |
| 4.93463652  | 5.323275077 | 5.002194241 |
| 3.730008726 | 2.510425138 | 3.074077007 |
| 2.840989505 | 2.626658921 | 2.780081859 |

|             |             |             |
|-------------|-------------|-------------|
| 2.780044924 | 3.045837964 | 3.871970194 |
| 3.067664925 | 3.199040625 | 3.387638213 |
| 2.631380969 | 3.10634187  | 2.607556421 |
| 4.968564259 | 3.897071691 | 5.530821036 |
| 3.504055748 | 3.339279456 | 3.568702187 |
| 2.778712192 | 2.61921926  | 3.978209717 |
| 3.979271415 | 3.000153581 | 3.860131342 |
| 4.094035084 | 2.587780887 | 3.11265176  |
| 3.418158468 | 2.479033125 | 3.968448202 |
| 3.125328334 | 2.623796923 | 3.215406552 |
| 2.752693645 | 5.544431092 | 3.498538968 |
| 4.736713524 | 3.581429485 | 4.271885878 |
| 3.976998655 | 3.116847752 | 3.729410685 |
| 4.266404185 | 3.207474491 | 2.731393792 |
| 4.839472148 | 3.468902154 | 3.533698877 |
| 4.329698597 | 4.044143795 | 5.855319552 |
| 4.406602851 | 5.149966014 | 4.278764016 |
| 4.134095981 | 2.500371471 | 3.451652418 |
| 3.428446132 | 2.646332462 | 2.640274875 |
| 3.252986245 | 4.593136989 | 6.286043588 |
| 2.909957163 | 2.545773846 | 3.787651147 |
| 4.495869185 | 2.60432328  | 3.599026755 |
| 5.398907382 | 4.286211146 | 2.634996088 |
| 3.316399979 | 3.190632483 | 2.800646865 |
| 2.660506504 | 3.099876857 | 3.202470366 |
| 3.619498379 | 3.251977406 | 2.733987784 |
| 4.949021446 | 3.495123257 | 4.538587391 |
| 4.192070061 | 4.13515917  | 4.748546552 |
| 3.118604853 | 2.585672751 | 2.73019868  |
| 4.383019839 | 2.876445575 | 3.768503454 |
| 2.789648871 | 2.540986104 | 3.466916861 |
| 3.674939149 | 2.875408214 | 3.133873611 |
| 2.824583309 | 3.109277764 | 2.688270039 |
| 4.268016704 | 4.484548446 | 3.591754117 |
| 3.021209071 | 2.805466358 | 2.684713504 |
| 3.60493908  | 3.940145027 | 4.45583163  |
| 3.32638772  | 3.900908034 | 3.853552007 |
| 6.144015687 | 3.208853674 | 2.870772439 |
| 3.112052238 | 4.016959513 | 2.483383604 |
| 3.67932591  | 3.011491339 | 2.873907809 |
| 4.105347633 | 5.832480402 | 3.318487394 |
| 3.426960137 | 2.735799668 | 2.928821469 |
| 2.891276788 | 3.558537933 | 2.518171366 |
| 7.50543161  | 4.340860689 | 3.590093148 |
| 4.125847923 | 3.198561624 | 2.781344412 |
| 5.020155821 | 4.309313369 | 4.484374301 |

|             |             |             |
|-------------|-------------|-------------|
| 3.900772399 | 2.535684056 | 2.619254678 |
| 3.530202046 | 3.062800376 | 4.210122274 |
| 4.462333874 | 3.239715319 | 3.839301749 |
| 3.358694297 | 2.58414372  | 2.963484287 |
| 3.362043176 | 4.058193784 | 2.521287219 |
| 4.658877056 | 3.422749655 | 4.346064794 |
| 4.890561552 | 2.598087381 | 3.417915298 |
| 3.372377933 | 3.021566711 | 3.719247309 |
| 2.504409486 | 3.427960993 | 4.963193007 |
| 3.557580839 | 4.11115838  | 3.724024385 |
| 4.931593141 | 2.948385358 | 3.632643465 |
| 6.501304778 | 3.591689078 | 2.483811256 |
| 5.350448303 | 4.135903734 | 2.731670244 |
| 5.144291553 | 2.530305041 | 3.236753009 |
| 3.329970928 | 2.490232438 | 4.157052207 |
| 3.012301445 | 4.111409733 | 3.03608754  |
| 3.788561646 | 2.475951512 | 3.117721213 |
| 3.526719154 | 2.535240145 | 4.845939321 |
| 3.846441663 | 2.619674064 | 3.706968004 |
| 4.439554366 | 3.075957789 | 3.7134806   |
| 2.459693313 | 3.053390552 | 3.46124081  |
| 3.173066351 | 2.620992427 | 2.598903542 |
| 2.946252245 | 2.681616479 | 2.553908839 |
| 3.741123584 | 3.781721083 | 4.018025507 |
| 3.582603244 | 3.787349124 | 2.5076123   |
| 3.353753644 | 2.444571337 | 2.958252475 |
| 3.645574408 | 3.012241693 | 2.431954897 |
| 2.591948547 | 3.604438596 | 3.317762504 |
| 4.520287468 | 4.499813266 | 4.113449782 |
| 3.542529181 | 3.770810714 | 3.618848058 |
| 3.329791932 | 2.821665848 | 2.971132317 |
| 4.087614587 | 2.613720043 | 3.740997718 |
| 2.497681067 | 5.165251866 | 4.999116262 |
| 3.308021488 | 3.037554382 | 2.935244589 |
| 3.199885276 | 2.523470526 | 4.089087393 |
| 4.335629405 | 2.543619579 | 4.452867449 |
| 3.398615124 | 3.702094808 | 2.593243385 |
| 4.105189076 | 2.472063489 | 2.476430419 |
| 4.172959176 | 2.656425934 | 3.699436969 |
| 6.06433319  | 4.651218193 | 6.545325374 |
| 3.475859931 | 2.94823937  | 3.022384502 |
| 3.431640488 | 2.543619287 | 3.065315701 |
| 2.662388673 | 4.224879383 | 4.479198332 |
| 2.767527134 | 2.64250566  | 2.855035963 |
| 2.551569864 | 3.92060986  | 3.69392034  |
| 5.830374991 | 5.794710746 | 4.862346714 |



|             |             |             |
|-------------|-------------|-------------|
| 4.128293475 | 2.53704482  | 4.301320488 |
| 3.878973603 | 2.998243673 | 3.56485676  |
| 4.142238622 | 2.864648949 | 3.20320662  |
| 2.970038062 | 2.489186108 | 2.771564252 |
| 3.272910712 | 2.560545103 | 2.529208827 |
| 4.158360315 | 3.84211174  | 4.960155643 |
| 3.779167406 | 3.536110238 | 2.965103741 |
| 2.997555762 | 2.787067321 | 3.169634085 |
| 2.83437903  | 2.885207895 | 2.68340226  |
| 2.682404285 | 2.824897179 | 3.231695219 |
| 4.325482776 | 3.688547719 | 3.587221264 |
| 2.786212715 | 3.08457959  | 3.011978754 |
| 3.023548339 | 3.689332138 | 3.345803766 |
| 4.525951805 | 4.128276924 | 3.175948564 |
| 2.858249191 | 2.612182055 | 3.491279923 |
| 4.04893718  | 3.78608133  | 2.749857185 |
| 4.745564506 | 3.208012242 | 3.116473636 |
| 3.77508761  | 2.694970935 | 3.737909469 |
| 3.913333324 | 2.760338393 | 3.359958061 |
| 4.802324098 | 3.15147347  | 4.990574668 |
| 7.156154389 | 2.552494733 | 4.527534947 |
| 4.136495367 | 2.798080648 | 4.195027347 |
| 3.26155033  | 2.952280884 | 2.483230206 |
| 4.043229245 | 3.478680212 | 3.936163313 |
| 3.224048868 | 3.070275075 | 3.43439944  |
| 4.086903919 | 2.457027274 | 4.473087992 |
| 2.440038417 | 2.686760474 | 2.676003516 |
| 2.413638004 | 2.821015855 | 4.725236677 |
| 5.247808734 | 3.205820888 | 4.065572783 |
| 3.590771698 | 2.398115628 | 2.867057776 |
| 3.702534493 | 2.915248285 | 3.642620124 |
| 3.976967034 | 3.793949406 | 2.491376741 |
| 4.366860578 | 2.410079359 | 4.113248751 |
| 6.234329821 | 4.257558741 | 4.312249275 |
| 3.735222997 | 3.077104224 | 2.97241604  |
| 4.306039245 | 3.476016999 | 3.563716249 |
| 4.204736543 | 3.001037568 | 2.496665665 |
| 3.013017658 | 2.789803205 | 2.838908474 |
| 3.072655272 | 2.496471125 | 3.083361485 |
| 5.687637578 | 4.929360835 | 5.004057216 |
| 3.286543208 | 3.739446134 | 2.899963511 |
| 2.513981832 | 3.15832692  | 4.548818723 |
| 4.198864176 | 4.560308487 | 2.574218658 |
| 7.502933254 | 6.113681263 | 5.6813678   |
| 3.412634907 | 2.490182798 | 3.616000629 |
| 3.055963699 | 3.118627064 | 3.067684483 |

|             |             |             |
|-------------|-------------|-------------|
| 2.752934548 | 2.560780408 | 5.005366967 |
| 2.602213975 | 2.625011428 | 2.553505878 |
| 2.375511155 | 6.161046425 | 3.213517849 |
| 2.378288356 | 3.663843656 | 2.936614464 |
| 2.87215176  | 2.974820475 | 2.503710202 |
| 9.068152255 | 6.279714577 | 7.085215945 |
| 3.983123313 | 3.056881246 | 2.37290294  |
| 4.08181328  | 3.821655705 | 3.281512584 |
| 5.091225932 | 3.258776411 | 3.238419062 |
| 4.422776903 | 3.020604452 | 3.665136338 |
| 3.833514324 | 2.516786494 | 6.283244071 |
| 3.548072106 | 3.458935064 | 2.400370182 |
| 2.532479322 | 3.807638528 | 4.063438717 |
| 2.411786588 | 4.070641438 | 5.624365953 |
| 3.344256841 | 2.600147566 | 3.215130304 |
| 3.211926869 | 2.868198891 | 2.98534749  |
| 2.776281147 | 3.118201364 | 2.469341592 |
| 4.245149422 | 2.988971747 | 2.80780535  |
| 3.349558628 | 3.386803106 | 2.84303574  |
| 4.042768108 | 2.477211674 | 3.713079307 |
| 2.41743819  | 2.612165341 | 2.61773942  |
| 5.984181122 | 2.9377776   | 6.100269024 |
| 3.153162247 | 4.09881859  | 2.408700317 |
| 4.871915548 | 5.504040943 | 4.925121552 |
| 3.791846545 | 2.640864244 | 2.349945786 |
| 2.643773571 | 2.847653044 | 2.990909591 |
| 7.031189668 | 2.373124302 | 6.133252735 |
| 4.661070766 | 3.993700959 | 3.718496037 |
| 3.402225875 | 3.963415833 | 2.475379912 |
| 3.567240397 | 3.532674716 | 4.16215706  |
| 3.766207205 | 2.509752382 | 3.396997011 |
| 3.467621877 | 3.735682115 | 3.493940967 |
| 4.062449581 | 2.449927202 | 2.80242877  |
| 3.091189356 | 2.543598957 | 2.926509287 |
| 3.384582117 | 2.735143277 | 3.459661897 |
| 3.800837802 | 2.542200739 | 4.025071141 |
| 2.499547452 | 3.750421535 | 4.044884274 |
| 3.337634004 | 3.001176214 | 4.359399275 |
| 3.8661143   | 2.397859925 | 3.818007956 |
| 2.336680947 | 3.116310193 | 5.473069535 |
| 4.334112229 | 2.921195897 | 2.830649386 |
| 3.2620106   | 2.370387515 | 3.066710293 |
| 4.238386093 | 2.821114562 | 4.156533789 |
| 2.44979338  | 3.533930379 | 3.017119174 |
| 4.002632561 | 3.222103156 | 2.377662382 |
| 3.238810339 | 2.960713321 | 2.410954749 |

|             |             |             |
|-------------|-------------|-------------|
| 3.26934021  | 5.249398729 | 4.534702945 |
| 3.517730831 | 3.028423684 | 3.009712059 |
| 4.566908694 | 4.485725455 | 2.699403653 |
| 3.484122207 | 4.74186549  | 6.187803318 |
| 3.144168839 | 3.050557864 | 2.426553301 |
| 3.640555167 | 2.378304852 | 3.780894309 |
| 3.344642958 | 2.855228778 | 3.440162582 |
| 3.74261729  | 2.487893651 | 2.881049938 |
| 3.546383778 | 2.319704603 | 3.777892914 |
| 3.67727543  | 3.279504132 | 3.414612597 |
| 2.522008119 | 3.62722173  | 5.945695634 |
| 3.968485161 | 2.806380562 | 3.311100695 |
| 2.412939224 | 3.319521787 | 3.603456061 |
| 2.473150948 | 3.027313074 | 3.398547491 |
| 3.233588936 | 2.528348474 | 3.096198962 |
| 3.642422741 | 2.541572159 | 3.571516881 |
| 4.41355896  | 3.729208957 | 3.551855272 |
| 3.163798154 | 2.469807739 | 2.959880353 |
| 3.040610696 | 2.969335402 | 3.505017297 |
| 3.28150451  | 2.598864224 | 3.199712934 |
| 4.969170818 | 2.514045828 | 4.721836477 |
| 4.357343752 | 2.343729137 | 2.849393653 |
| 3.917594295 | 3.024636891 | 3.977728427 |
| 3.96240902  | 2.447906695 | 3.041473041 |
| 3.734228657 | 2.989027124 | 4.628524657 |
| 5.000947385 | 4.079633884 | 2.397646392 |
| 5.350380711 | 3.753906552 | 3.586394652 |
| 2.47311533  | 2.51804753  | 2.64618361  |
| 3.496227281 | 3.562474061 | 3.783049664 |
| 2.91372522  | 2.624213497 | 3.016332353 |
| 5.494728951 | 4.244574056 | 2.358846095 |
| 3.234305207 | 2.941030148 | 3.525157568 |
| 3.326833781 | 4.883134986 | 2.450556233 |
| 4.401676522 | 3.232301883 | 2.970737984 |
| 2.579577432 | 3.739572587 | 3.07380415  |
| 4.18641151  | 3.609437566 | 3.766817057 |
| 7.620809699 | 8.803574326 | 3.092109194 |
| 2.515186658 | 4.035834609 | 4.041655802 |
| 4.501798324 | 2.701779044 | 3.22690418  |
| 2.617614113 | 3.854614227 | 3.990991691 |
| 4.804749261 | 4.243424761 | 4.383204544 |
| 4.819135646 | 2.44449969  | 2.756751782 |
| 7.008050637 | 3.171244531 | 2.531120589 |
| 3.77806849  | 5.447080403 | 2.383600024 |
| 3.703835272 | 3.937619753 | 2.526926657 |
| 4.738224334 | 2.424134649 | 4.241959951 |

|             |             |             |
|-------------|-------------|-------------|
| 3.061156582 | 2.609560569 | 3.107460059 |
| 3.381476046 | 2.323992008 | 3.260270382 |
| 3.875918313 | 3.849041029 | 2.531002539 |
| 5.394880786 | 2.402163276 | 4.312304785 |
| 5.329819053 | 3.212901563 | 3.37532934  |
| 3.403795629 | 3.44917371  | 3.303168869 |
| 2.950333604 | 2.427467057 | 3.717309396 |
| 3.661929073 | 3.195341903 | 2.523404542 |
| 3.62077369  | 4.438918671 | 3.70312679  |
| 4.232862238 | 2.346927094 | 2.497633186 |
| 2.873546082 | 2.839691231 | 3.720968527 |
| 4.821665697 | 4.323257219 | 2.874139645 |
| 2.971078851 | 3.094001325 | 3.566944935 |
| 3.907059897 | 2.30527695  | 4.577971018 |
| 2.730518363 | 3.095714147 | 2.382561907 |
| 5.673819859 | 5.568979296 | 7.183694426 |
| 4.827638859 | 2.502196459 | 4.165493541 |
| 5.751554888 | 3.8248723   | 5.728453378 |
| 2.703117855 | 3.159337145 | 4.125671995 |
| 3.710718691 | 3.590215498 | 2.448798553 |
| 2.495677361 | 3.013147631 | 3.200130002 |
| 4.025643286 | 2.473810033 | 2.929671054 |
| 4.970684242 | 2.441089543 | 4.36495045  |
| 5.002955656 | 2.30771767  | 3.0113234   |
| 4.457128959 | 2.54500964  | 4.496332748 |
| 3.601742582 | 2.44557237  | 3.9670541   |
| 3.44152279  | 3.163217224 | 2.693707359 |
| 3.754748539 | 3.115325782 | 3.099791619 |
| 3.674830904 | 2.360281236 | 3.88771266  |
| 6.970791902 | 5.31557099  | 2.830668848 |
| 4.639980712 | 2.545905926 | 2.635510442 |
| 2.693070294 | 3.810530023 | 3.786569324 |
| 3.711036981 | 3.506515646 | 3.789272804 |
| 4.218779702 | 4.748710524 | 5.187325979 |
| 4.447831992 | 2.433403904 | 3.489826287 |
| 4.653333173 | 5.384083413 | 4.195613142 |
| 2.507849721 | 3.134058053 | 5.227779554 |
| 2.945772895 | 3.314476884 | 2.756342371 |
| 2.916082621 | 2.70515272  | 2.670966309 |
| 5.157981034 | 4.263158871 | 5.329020448 |
| 3.885563885 | 2.400195159 | 3.958610779 |
| 4.474160071 | 2.39580464  | 4.275340526 |
| 2.824009927 | 3.027746482 | 2.415684651 |
| 5.253641956 | 2.309155993 | 4.110183352 |
| 4.4341727   | 3.630946789 | 3.981493142 |
| 5.839956382 | 4.44674831  | 5.401759477 |

|             |             |             |
|-------------|-------------|-------------|
| 2.940679147 | 2.54465621  | 3.544238438 |
| 2.403813693 | 2.657247537 | 2.948859666 |
| 4.350219548 | 2.743551529 | 3.63704121  |
| 4.148317565 | 4.374978139 | 3.721092911 |
| 3.774010672 | 3.353012079 | 3.03094929  |
| 2.415093179 | 2.875514373 | 3.305593938 |
| 3.220569211 | 2.97569664  | 2.293174266 |
| 3.784581416 | 3.106307076 | 3.923152    |
| 3.428745604 | 3.098037606 | 2.324319782 |
| 3.079862462 | 3.079228491 | 2.734195532 |
| 5.179927586 | 2.5664667   | 3.748011887 |
| 3.121784027 | 5.037083794 | 4.960021743 |
| 2.851220654 | 2.439525134 | 3.865781505 |
| 3.750988958 | 3.818355158 | 3.826106775 |
| 5.346195465 | 2.724984109 | 3.464587713 |
| 2.944507411 | 3.588815616 | 4.128363794 |
| 3.975169294 | 2.451487397 | 3.132881428 |
| 3.675301913 | 3.173174143 | 3.602029386 |
| 4.770667241 | 2.938391208 | 4.13747112  |
| 3.32351304  | 2.91757635  | 3.328414916 |
| 3.249936746 | 2.905482973 | 3.545394307 |
| 3.70320367  | 3.765453931 | 2.268141296 |
| 5.281380533 | 2.309086944 | 3.331958271 |
| 2.947586019 | 2.560544393 | 2.727938266 |
| 3.527093823 | 2.718814794 | 2.918671353 |
| 5.063559078 | 2.40707542  | 3.365928751 |
| 3.091291392 | 3.686297866 | 3.919572853 |
| 2.891238844 | 2.939303226 | 3.014130003 |
| 4.298202258 | 2.854268552 | 3.164871747 |
| 4.490475398 | 2.494827898 | 4.966831043 |
| 6.049859797 | 4.819931195 | 4.993697076 |
| 2.650315735 | 2.702567151 | 3.30181558  |
| 2.80773228  | 3.071606242 | 2.381803887 |
| 2.543806263 | 2.68370855  | 3.873200893 |
| 2.595077589 | 4.695081133 | 4.996335294 |
| 3.075172242 | 2.510208098 | 2.336339478 |
| 3.741577269 | 2.507440009 | 2.482334084 |
| 2.891190567 | 3.093043809 | 2.47471084  |
| 3.157070139 | 2.690629133 | 2.635048468 |
| 2.774665505 | 2.914530584 | 3.019401278 |
| 3.550021786 | 2.602895884 | 2.53889464  |
| 5.444062909 | 2.315856952 | 2.399572531 |
| 3.492264068 | 2.32570644  | 3.019596423 |
| 4.205440606 | 2.34122177  | 3.393969939 |
| 3.415012549 | 2.871406689 | 2.296782357 |
| 3.741187843 | 2.947056212 | 2.248733974 |

|             |             |             |
|-------------|-------------|-------------|
| 5.032019933 | 2.601624558 | 4.583030639 |
| 3.298443189 | 2.701433933 | 2.379525688 |
| 4.146979831 | 2.893908625 | 3.666860379 |
| 4.993643671 | 2.689023813 | 4.923061229 |
| 4.422387929 | 3.508785842 | 3.271102831 |
| 2.727225086 | 3.049455032 | 2.571417858 |
| 2.823551613 | 3.690700056 | 3.087188596 |
| 2.324326238 | 2.761310294 | 3.503734921 |
| 3.292567482 | 3.862062374 | 3.623396718 |
| 3.283841562 | 2.377072855 | 2.915633639 |
| 4.469946922 | 7.453957538 | 2.5502743   |
| 2.890649685 | 3.179183157 | 3.928225757 |
| 4.008909982 | 2.337278965 | 2.834334062 |
| 3.353828078 | 2.98748894  | 4.031119753 |
| 2.971705776 | 3.307513636 | 4.262742576 |
| 3.42312713  | 2.545100555 | 3.237181116 |
| 8.256870475 | 3.361232923 | 6.936167269 |
| 3.475827533 | 2.415313833 | 3.81362432  |
| 4.21219725  | 3.466258573 | 4.670536321 |
| 3.42048696  | 3.399111661 | 3.615086786 |
| 4.741176614 | 4.472664592 | 2.663041334 |
| 2.220016377 | 3.771948123 | 3.433814827 |
| 4.306516492 | 3.329302833 | 2.479336664 |
| 3.778738686 | 3.226403946 | 3.142388393 |
| 3.207512184 | 4.018724058 | 2.882785489 |
| 3.729589827 | 2.711360818 | 3.112591879 |
| 2.453063938 | 2.699111028 | 2.790451895 |
| 2.949536337 | 4.023723235 | 2.338446035 |
| 3.379365474 | 2.233841058 | 3.321155853 |
| 2.615297642 | 2.582319556 | 3.463059914 |
| 2.698174366 | 3.120597078 | 3.128940204 |
| 3.738008912 | 3.274939732 | 3.093490539 |
| 4.11881768  | 2.858116695 | 3.4453716   |
| 5.318826675 | 2.990143415 | 5.011080032 |
| 2.335497497 | 3.376169842 | 4.724236673 |
| 3.386425775 | 2.322613612 | 2.960814047 |
| 3.510254534 | 3.491410887 | 4.45545711  |
| 2.78294626  | 3.2032395   | 2.727365934 |
| 3.79915378  | 2.439338683 | 3.320903486 |
| 5.126828358 | 4.868639601 | 4.292367727 |
| 2.400727213 | 3.50707204  | 3.44182216  |
| 2.761292354 | 2.274893843 | 3.883922888 |
| 2.354733086 | 4.04602481  | 4.266476085 |
| 4.336706536 | 2.796858261 | 2.451178918 |
| 2.562608454 | 2.281915578 | 3.012260969 |
| 2.330791927 | 3.243664467 | 2.529892381 |

|             |             |             |
|-------------|-------------|-------------|
| 2.392809504 | 2.593817383 | 3.825135342 |
| 2.948331958 | 3.474850863 | 3.169648361 |
| 2.344561852 | 2.562211273 | 2.234162479 |
| 2.295302105 | 3.455539878 | 4.059751113 |
| 4.144238965 | 2.806493111 | 3.151002185 |
| 4.482474493 | 3.103571555 | 3.81480951  |
| 4.204478679 | 4.179138406 | 3.126101959 |
| 2.27409814  | 4.719974407 | 3.997547542 |
| 3.670129579 | 5.200168146 | 3.780379669 |
| 3.298679202 | 2.355862737 | 3.101694532 |
| 3.875380798 | 2.448767169 | 4.315762014 |
| 3.76596201  | 3.439211441 | 2.641530826 |
| 3.336221779 | 2.336569808 | 2.55352055  |
| 4.317522543 | 2.386829641 | 3.534968051 |
| 4.307995996 | 3.048392018 | 3.877157449 |
| 2.336773202 | 2.961898075 | 2.875969438 |
| 2.934130106 | 2.788546541 | 5.169026278 |
| 3.39964582  | 2.280718195 | 2.63698598  |
| 3.962850891 | 3.754014938 | 4.671603537 |
| 3.701971187 | 2.405780821 | 2.89979163  |
| 3.937491015 | 4.430129438 | 2.524750018 |
| 5.231530333 | 3.985850402 | 4.637007178 |
| 4.305380926 | 2.365326504 | 4.558547596 |
| 2.373801055 | 2.856201707 | 3.177207512 |
| 2.520771417 | 3.193805784 | 5.653743615 |
| 3.633937638 | 3.340884098 | 3.227084725 |
| 3.503653512 | 2.907091834 | 3.11768852  |
| 2.893912962 | 2.392718201 | 2.370025822 |
| 4.628068777 | 2.966216463 | 2.392067114 |
| 2.964701041 | 2.934089785 | 3.332662826 |
| 2.921009113 | 2.586396878 | 2.312580688 |
| 3.279061918 | 2.394505084 | 3.301149887 |
| 3.64379458  | 5.348440453 | 5.10830184  |
| 3.229814533 | 2.278310741 | 4.694561458 |
| 3.27103105  | 2.589611225 | 2.641976851 |
| 5.991944106 | 8.733622251 | 7.513317187 |
| 4.087575274 | 3.723954117 | 3.116424442 |
| 2.494473209 | 2.834663312 | 2.600692194 |
| 4.154415265 | 2.794157729 | 4.080116787 |
| 3.798874009 | 3.693485897 | 3.919917628 |
| 5.116314768 | 3.110129542 | 3.539558251 |
| 2.655596504 | 2.249632977 | 2.376514366 |
| 3.950651532 | 3.092372304 | 2.370658155 |
| 2.344189808 | 5.422050051 | 6.30928147  |
| 4.610246675 | 2.864934251 | 2.257002636 |
| 2.328330993 | 4.385747631 | 5.389158942 |

|             |             |             |
|-------------|-------------|-------------|
| 2.788390496 | 2.487552534 | 2.630431076 |
| 5.062597483 | 5.410593518 | 4.033709762 |
| 3.890391199 | 3.063073279 | 3.570851082 |
| 2.359233437 | 2.904076115 | 2.44141686  |
| 4.42603336  | 2.34999036  | 5.755875761 |
| 4.297386579 | 3.415982773 | 3.536267285 |
| 4.367284853 | 3.779732316 | 4.192578519 |
| 2.987051522 | 2.998528964 | 3.853817677 |
| 3.73383811  | 3.721328599 | 3.862295811 |
| 2.660909936 | 3.577417028 | 4.242549193 |
| 5.452079815 | 3.991232421 | 5.186365124 |
| 4.632237162 | 2.979664984 | 3.665976183 |
| 3.765978556 | 2.489189642 | 2.488384374 |
| 2.278818665 | 2.414202349 | 4.150466159 |
| 4.822435336 | 2.392883109 | 4.238418642 |
| 3.397899545 | 4.077609987 | 4.459770794 |
| 3.357431706 | 3.241447903 | 3.910903127 |
| 3.033904137 | 2.666270963 | 3.028484662 |
| 3.531520813 | 2.253099433 | 3.637730234 |
| 2.783534815 | 3.128734499 | 3.116731628 |
| 4.224856648 | 2.20357902  | 2.811818897 |
| 3.166121656 | 2.750798374 | 3.110614109 |
| 2.82332976  | 2.994029099 | 2.622268125 |
| 3.921536497 | 2.260589392 | 3.625950107 |
| 4.411751461 | 3.518010433 | 2.250903724 |
| 3.92071025  | 5.050354974 | 2.30720231  |
| 2.291621849 | 4.639278781 | 4.8693587   |
| 3.216937111 | 2.904868378 | 2.446570431 |
| 2.724033939 | 3.449042383 | 3.09275909  |
| 3.868416011 | 2.300646598 | 4.123437308 |
| 3.515856716 | 2.315259095 | 2.795798296 |
| 2.361485224 | 2.867366697 | 3.013301049 |
| 3.222450479 | 4.596930059 | 5.455918009 |
| 3.808344677 | 2.343945954 | 3.231514291 |
| 5.162337714 | 5.235136574 | 4.168378953 |
| 5.596647242 | 4.049184379 | 2.862991844 |
| 3.765250063 | 2.7161652   | 4.346742056 |
| 3.687197706 | 3.38106451  | 4.066363839 |
| 4.302833998 | 3.269649261 | 3.485588489 |
| 3.840130928 | 3.459064894 | 2.798958664 |
| 2.337197313 | 2.723038316 | 2.645256733 |
| 4.007711186 | 2.215258917 | 4.84110102  |
| 2.734796928 | 2.176187101 | 3.088121616 |
| 6.926405858 | 5.170657246 | 2.75427557  |
| 3.813193302 | 2.297911394 | 2.596254203 |
| 3.680327232 | 2.581740381 | 2.388754531 |



|             |             |             |
|-------------|-------------|-------------|
| 2.67997605  | 2.591424036 | 3.1341494   |
| 2.481466577 | 2.425007015 | 2.346557164 |
| 3.375746012 | 2.284538901 | 3.106849115 |
| 2.325668585 | 3.153059872 | 4.710636567 |
| 3.839401676 | 2.567442205 | 3.322225083 |
| 3.826260831 | 3.484252756 | 3.835746486 |
| 3.708679533 | 3.413292156 | 3.660936877 |
| 4.655617373 | 3.85019147  | 3.981144917 |
| 3.340054044 | 2.391922571 | 2.153336574 |
| 3.278411573 | 2.492237318 | 3.10687508  |
| 3.801890284 | 3.854462273 | 2.157874447 |
| 4.455026654 | 2.957334526 | 3.412157204 |
| 2.430252017 | 2.936959003 | 3.209560805 |
| 3.720323336 | 2.416993677 | 2.972821492 |
| 2.68231375  | 2.952564085 | 3.452582337 |
| 2.727309363 | 2.15725946  | 2.331420024 |
| 3.658733394 | 2.895770575 | 3.898533445 |
| 2.951325598 | 3.38677423  | 2.684269553 |
| 2.713528255 | 2.112610774 | 2.861032584 |
| 4.334147562 | 3.73694373  | 4.820218945 |
| 3.369892137 | 2.634603004 | 2.570954231 |
| 2.400245407 | 2.796722944 | 2.146672092 |
| 3.62306202  | 2.479901588 | 2.273612702 |
| 3.638168674 | 2.66663189  | 4.247413482 |
| 4.741382323 | 2.294991001 | 2.827190838 |
| 2.203744274 | 2.223679228 | 2.757306138 |
| 3.022846973 | 2.3560113   | 3.072637412 |
| 2.181039696 | 2.278084276 | 3.283192067 |
| 2.252610563 | 3.098760537 | 2.881124125 |
| 3.107163618 | 3.875711468 | 3.775170345 |
| 2.145812499 | 3.369777604 | 3.452630925 |
| 4.174917111 | 3.900604767 | 2.193640783 |
| 2.306885681 | 3.700027817 | 4.13263869  |
| 3.934385657 | 4.767042575 | 4.278484109 |
| 4.396275976 | 2.369872566 | 2.466506089 |
| 3.570124922 | 2.609215147 | 3.002415272 |
| 2.796473939 | 2.901506766 | 3.416830772 |
| 3.078284852 | 2.975868308 | 2.503743793 |
| 4.161881794 | 3.671237877 | 4.34169868  |
| 2.953127612 | 2.113320538 | 3.39271734  |
| 3.424477692 | 2.507310621 | 3.809736421 |
| 4.247419416 | 2.376596591 | 4.711532386 |
| 2.254051152 | 2.168635517 | 3.312308605 |
| 3.933327548 | 2.330248216 | 3.589434101 |
| 3.550982716 | 3.769729429 | 2.915406146 |
| 3.216065402 | 2.805262791 | 2.219707446 |

|             |             |             |
|-------------|-------------|-------------|
| 2.726417052 | 2.469736165 | 2.3408641   |
| 3.908743592 | 3.853165108 | 2.322919103 |
| 5.817957248 | 3.799330532 | 4.684617698 |
| 3.6484371   | 2.595191611 | 2.94394014  |
| 2.848170555 | 2.142020942 | 2.973717162 |
| 3.615188324 | 2.133680108 | 2.809191318 |
| 4.185158059 | 3.450366659 | 2.784046027 |
| 3.598808262 | 2.294267589 | 3.394361108 |
| 4.214365802 | 4.038290045 | 2.529678654 |
| 3.110668089 | 3.598084535 | 2.706326658 |
| 2.573899846 | 3.747491718 | 3.962604388 |
| 2.158476886 | 2.905549117 | 3.843353973 |
| 2.870065989 | 2.25733915  | 2.864757256 |
| 2.891079429 | 2.822126376 | 2.231264186 |
| 3.115798905 | 2.749120385 | 2.528348868 |
| 2.330741104 | 3.940241568 | 4.319739094 |
| 3.104618337 | 2.825248468 | 2.752258863 |
| 2.181728657 | 3.181567493 | 3.21537306  |
| 2.945190615 | 2.134975659 | 2.545766061 |
| 3.453615218 | 2.276445144 | 3.471813151 |
| 2.531134848 | 4.997814205 | 4.690999347 |
| 5.114246052 | 3.043612096 | 3.36325822  |
| 2.915931302 | 2.920559397 | 2.650436058 |
| 3.110087088 | 3.08438466  | 2.557776273 |
| 4.094116634 | 3.156188179 | 3.334435786 |
| 2.852461956 | 2.784172973 | 2.572312407 |
| 4.045829866 | 4.40531869  | 3.616475575 |
| 2.574826821 | 2.13575101  | 2.66237147  |
| 3.567292006 | 3.076601945 | 2.209330543 |
| 2.840757442 | 3.622147657 | 3.662219609 |
| 3.490558479 | 2.514891688 | 3.17548931  |
| 2.844630288 | 2.97259088  | 3.423026097 |
| 2.138333917 | 2.441852183 | 3.829214456 |
| 2.363689746 | 2.669571046 | 3.429330183 |
| 2.657195566 | 4.005187451 | 3.845696057 |
| 2.496076841 | 2.816829685 | 2.928082778 |
| 2.524946858 | 3.822518661 | 2.511088221 |
| 5.333257095 | 3.48723556  | 3.0162719   |
| 2.508588562 | 2.55609918  | 2.236679218 |
| 2.376831187 | 2.379188045 | 3.091897428 |
| 2.166620324 | 2.887538474 | 3.914590028 |
| 2.20299256  | 2.944329527 | 2.433184507 |
| 2.920147248 | 2.236420967 | 3.262697063 |
| 4.511483028 | 2.947742117 | 3.369319095 |
| 2.182907877 | 3.53146296  | 7.136796799 |
| 4.494981678 | 3.429687091 | 4.415983411 |

|             |             |             |
|-------------|-------------|-------------|
| 2.711977548 | 3.280029315 | 3.094685014 |
| 3.036198112 | 2.380360247 | 2.631158878 |
| 2.94920731  | 2.148480885 | 3.340059294 |
| 3.031085436 | 3.252472121 | 4.944777596 |
| 6.529041548 | 3.940900442 | 2.797287693 |
| 5.702989968 | 6.26410535  | 4.645628874 |
| 2.405745363 | 2.277166269 | 2.214251901 |
| 4.867544194 | 4.51941282  | 4.921628191 |
| 4.510725931 | 3.705333687 | 3.188732595 |
| 4.0731426   | 2.427500911 | 2.445589848 |
| 2.355902288 | 2.919250932 | 2.82156595  |
| 6.686526021 | 2.216306258 | 5.696963489 |
| 3.633575864 | 2.750842931 | 3.410347397 |
| 4.532498139 | 3.683200143 | 2.276172549 |
| 4.161487003 | 3.305900952 | 3.402114742 |
| 3.396415706 | 2.870998216 | 3.025126669 |
| 6.08828171  | 3.612990019 | 3.969555228 |
| 3.100111252 | 3.969601737 | 3.559285419 |
| 3.928007679 | 2.343650273 | 3.509297415 |
| 5.779669942 | 2.134425877 | 6.518415197 |
| 4.034244489 | 3.514989578 | 3.672411167 |
| 3.322493257 | 4.073403914 | 4.599995864 |
| 3.112972825 | 2.561906623 | 2.499769744 |
| 4.226879275 | 2.201039445 | 2.98632561  |
| 4.005233381 | 2.116251311 | 3.391221339 |
| 2.177300127 | 2.971139815 | 3.788180282 |
| 2.916889339 | 2.366291507 | 2.316313124 |
| 2.879156369 | 2.11597413  | 3.582709413 |
| 3.241266867 | 3.014152595 | 2.820085313 |
| 2.206898456 | 4.123741735 | 3.562372667 |
| 3.09260711  | 2.2474789   | 2.362183991 |
| 2.832396863 | 2.703129271 | 2.502546851 |
| 3.732716369 | 5.036228794 | 3.98356541  |
| 3.7721199   | 2.24890415  | 5.866535813 |
| 3.514304927 | 2.254822375 | 3.80476406  |
| 2.587655469 | 3.979065243 | 4.040632862 |
| 3.511296675 | 2.135762107 | 4.86024982  |
| 3.760359979 | 2.209118685 | 3.90441625  |
| 4.113131451 | 2.163670072 | 3.207722443 |
| 2.966599437 | 2.479135506 | 2.459760681 |
| 3.086342068 | 2.082093133 | 2.935708856 |
| 4.930737314 | 2.79034689  | 2.88257291  |
| 3.332919977 | 3.385288648 | 5.088788346 |
| 3.51338245  | 2.142602896 | 3.270936365 |
| 2.631814154 | 2.804112487 | 3.049942355 |
| 3.539035394 | 2.191041654 | 2.446507291 |

|             |             |             |
|-------------|-------------|-------------|
| 2.1077045   | 3.799056113 | 3.1313707   |
| 3.245857306 | 4.236145995 | 2.823441571 |
| 3.618408335 | 3.147422287 | 3.942203871 |
| 2.727453475 | 2.131437869 | 2.319605666 |
| 3.683870596 | 3.998013256 | 2.641877556 |
| 2.567326887 | 2.48776353  | 2.167822509 |
| 2.244442105 | 5.853414964 | 4.960792964 |
| 7.476069643 | 6.8314756   | 7.811488403 |
| 3.505273045 | 3.380525985 | 2.543884933 |
| 5.098815216 | 4.140549415 | 2.454342633 |
| 5.11031125  | 2.073984718 | 4.073617093 |
| 6.079664163 | 4.22297066  | 2.397752787 |
| 3.623385331 | 3.285436497 | 2.136131873 |
| 2.77680531  | 2.579723431 | 2.31789375  |
| 3.646224413 | 2.823055875 | 3.547072377 |
| 2.202319508 | 4.023104494 | 5.338554586 |
| 3.210867724 | 2.367298399 | 4.372631111 |
| 2.127929606 | 2.287044942 | 2.394134842 |
| 3.717586911 | 3.560656222 | 4.364698179 |
| 2.723872415 | 3.26210453  | 2.253710491 |
| 2.903249047 | 3.650588664 | 2.52435331  |
| 2.280760362 | 3.011972658 | 2.387239543 |
| 4.508826383 | 3.046402598 | 2.130501213 |
| 2.346682054 | 2.058415771 | 2.802723262 |
| 2.499598288 | 2.331305523 | 2.442375887 |
| 2.765829433 | 2.080921217 | 2.708239461 |
| 3.2576648   | 2.046907243 | 3.084134993 |
| 4.695780412 | 3.959254664 | 3.843811077 |
| 2.265728396 | 4.432831033 | 4.689613514 |
| 4.43542815  | 2.314224581 | 4.216547081 |
| 3.321862932 | 2.127781102 | 3.25436787  |
| 3.985829356 | 4.009625959 | 5.569007563 |
| 3.42012253  | 2.524508971 | 3.131295836 |
| 2.727768877 | 3.861132034 | 3.067745218 |
| 3.026262765 | 3.271349855 | 2.269323927 |
| 2.668758363 | 2.240688295 | 3.111161136 |
| 4.106777829 | 2.588921703 | 3.160952392 |
| 4.536130556 | 3.805026053 | 2.13138345  |
| 4.548491602 | 2.326027286 | 2.43688296  |
| 2.739056556 | 2.360952791 | 2.333860383 |
| 6.471246506 | 2.210053711 | 6.196290108 |
| 4.275581305 | 3.655092496 | 2.180846789 |
| 2.374448419 | 3.026624628 | 2.355624132 |
| 3.454829226 | 2.359469988 | 3.232498713 |
| 3.453788524 | 3.057131052 | 2.265349135 |
| 5.275607171 | 4.267579855 | 4.868615267 |

|             |             |             |
|-------------|-------------|-------------|
| 5.183109156 | 3.896536688 | 3.009206903 |
| 3.998064701 | 3.798742914 | 2.396410158 |
| 4.040840112 | 2.794902845 | 2.059463757 |
| 3.941810094 | 4.64962616  | 2.362689208 |
| 2.237225298 | 2.927451011 | 3.294183493 |
| 2.723727402 | 2.860315695 | 2.720896581 |
| 4.033210978 | 2.683713832 | 2.818183906 |
| 2.104430124 | 3.363992859 | 2.972773066 |
| 2.817164586 | 2.070016396 | 3.242802833 |
| 2.811818388 | 2.410208314 | 4.221385019 |
| 3.444065543 | 4.345893183 | 4.261272499 |
| 5.001641945 | 2.160327629 | 4.683643647 |
| 3.851822787 | 2.0366203   | 3.333948703 |
| 5.519094089 | 6.456627056 | 2.12129505  |
| 2.915076095 | 2.124055036 | 2.714733593 |
| 3.299566983 | 2.523225952 | 3.089345628 |
| 3.004300094 | 3.016805886 | 2.63708368  |
| 2.545820624 | 2.472990037 | 2.158929565 |
| 5.41874666  | 3.767490024 | 3.883660024 |
| 4.296270613 | 3.815304466 | 3.746272177 |
| 2.368520914 | 2.669849652 | 2.452670367 |
| 3.324786643 | 4.390825997 | 4.118751509 |
| 6.927684812 | 2.461841697 | 3.3592597   |
| 2.253876243 | 3.47283787  | 2.446355471 |
| 4.604889912 | 3.526978789 | 4.058171443 |
| 3.997020504 | 2.879294955 | 2.207663853 |
| 6.358611429 | 5.528963043 | 6.50000832  |
| 4.348212561 | 3.597549458 | 4.01794254  |
| 3.325370677 | 2.836787614 | 2.201273279 |
| 2.666101105 | 3.056752085 | 3.646989763 |
| 1.994293411 | 3.035733076 | 2.621198465 |
| 6.087792331 | 6.076799854 | 6.344364317 |
| 2.895234172 | 2.401083106 | 3.185935749 |
| 2.824127347 | 2.51155231  | 2.937261232 |
| 3.202963396 | 3.087951462 | 3.109404975 |
| 3.492349812 | 2.631156196 | 2.082915741 |
| 2.632449783 | 3.461209117 | 2.560027562 |
| 2.251467394 | 3.902419144 | 6.693377977 |
| 3.166064422 | 2.168869448 | 2.798641132 |
| 3.4917085   | 2.972197667 | 2.243298604 |
| 2.003257559 | 4.164498168 | 2.091371036 |
| 6.152070977 | 2.780287784 | 3.29373402  |
| 3.885264912 | 3.415834587 | 3.276927686 |
| 3.330495428 | 2.817692038 | 2.223448656 |
| 4.52568384  | 2.839605466 | 3.902216943 |
| 2.868966523 | 2.494762131 | 4.517812086 |

|             |             |             |
|-------------|-------------|-------------|
| 2.57788325  | 2.461594171 | 2.677889329 |
| 2.744876382 | 2.771894851 | 3.558582828 |
| 3.610975032 | 3.01368712  | 2.071841142 |
| 3.364641817 | 2.24035849  | 3.115763702 |
| 3.273071002 | 2.228123771 | 3.117812392 |
| 2.338810675 | 2.370375657 | 2.639213061 |
| 3.042450013 | 2.285700009 | 4.421492627 |
| 5.555756324 | 3.982121437 | 2.337455208 |
| 2.475558537 | 2.539003334 | 3.411589697 |
| 3.51512958  | 2.089900316 | 2.607407348 |
| 3.326582516 | 2.052540521 | 2.862623262 |
| 4.51590647  | 3.793256064 | 4.40097666  |
| 3.541590038 | 3.142518645 | 2.654862208 |
| 2.904652821 | 4.661047979 | 3.456042928 |
| 4.283782206 | 3.897371645 | 3.795940395 |
| 4.216644623 | 1.974307735 | 3.152094513 |
| 2.314796748 | 2.951578462 | 2.466000283 |
| 2.057893452 | 3.318038934 | 5.881324693 |
| 3.966608885 | 2.118080908 | 3.294008296 |
| 7.683404071 | 2.063494068 | 5.098764069 |
| 5.578794937 | 2.301029055 | 5.869119285 |
| 2.981530553 | 2.462226402 | 2.077412692 |
| 5.978293532 | 4.86780331  | 2.117125281 |
| 4.119702088 | 2.885281157 | 3.177494363 |
| 2.128203278 | 2.917551239 | 2.452591197 |
| 3.440395179 | 3.415797533 | 2.660928097 |
| 5.329885008 | 4.577302961 | 3.95621015  |
| 2.00331356  | 3.007804991 | 3.867938331 |
| 4.873365974 | 3.249087862 | 3.599172375 |
| 5.004557119 | 3.851503158 | 2.03892044  |
| 2.976265521 | 3.144401949 | 3.483585075 |
| 2.943040739 | 2.235547185 | 2.616434496 |
| 5.906486689 | 3.875728843 | 2.939389876 |
| 2.918819941 | 2.985254847 | 2.25943018  |
| 2.464842888 | 2.572370251 | 2.797323134 |
| 3.837794294 | 5.148166416 | 4.889657169 |
| 1.993586011 | 2.830505466 | 3.538846219 |
| 2.997717396 | 2.718133998 | 2.085125038 |
| 3.170919886 | 1.985897913 | 2.296831765 |
| 2.70493204  | 2.247502846 | 2.135016523 |
| 2.957131104 | 2.146775215 | 2.638021692 |
| 2.600388622 | 2.096387068 | 2.469911827 |
| 3.092798143 | 4.30155182  | 4.076002315 |
| 3.982037402 | 4.062020135 | 3.572474286 |
| 3.24576927  | 2.110774081 | 3.192616386 |
| 2.031887506 | 3.44912882  | 3.356069941 |

|             |             |             |
|-------------|-------------|-------------|
| 4.144748431 | 2.296928437 | 4.372204319 |
| 4.04987324  | 2.978138377 | 3.641911407 |
| 4.428672946 | 3.607416293 | 2.814099322 |
| 3.286270036 | 1.933883488 | 2.292558312 |
| 2.215519315 | 2.684666449 | 3.490288381 |
| 3.68417277  | 3.424715408 | 2.233746175 |
| 3.618660667 | 3.99434326  | 2.429634601 |
| 4.352003406 | 2.275579553 | 3.672818388 |
| 2.637523498 | 2.898198211 | 2.888088016 |
| 4.038098398 | 2.379717495 | 2.698588244 |
| 2.637617806 | 2.355768262 | 2.362435359 |
| 2.18280615  | 2.157577323 | 2.295879522 |
| 2.342066364 | 2.980751677 | 3.091245183 |
| 2.993513341 | 3.070016061 | 3.107239784 |
| 3.712402796 | 2.076686035 | 2.757930852 |
| 3.914124    | 5.641254743 | 2.25614713  |
| 2.96125593  | 2.412640119 | 2.855952845 |
| 2.444904923 | 2.035788809 | 3.215773742 |
| 4.539380175 | 3.536413144 | 2.038397929 |
| 4.314985038 | 3.773653863 | 2.428036892 |
| 2.371931258 | 3.368559321 | 2.811417012 |
| 2.620202091 | 2.68275779  | 3.498930866 |
| 3.195057457 | 2.106539509 | 4.430143218 |
| 3.846477366 | 3.257421308 | 2.929936188 |
| 3.700148542 | 5.461287006 | 5.657850146 |
| 2.109586853 | 2.557017183 | 3.318704545 |
| 2.02539919  | 3.056335627 | 2.521789098 |
| 3.625309956 | 2.695061212 | 2.025338416 |
| 3.275124768 | 2.107022753 | 2.909447238 |
| 6.019737128 | 4.36007191  | 6.086631891 |
| 2.323764292 | 2.058475683 | 2.513559044 |
| 2.254223069 | 2.352456686 | 2.306194779 |
| 3.944725352 | 2.333600259 | 7.090979709 |
| 4.68169876  | 4.154400531 | 2.281944601 |
| 3.747049983 | 5.018303611 | 3.03322013  |
| 5.090695342 | 3.682589334 | 1.983256012 |
| 2.834454972 | 3.09192936  | 3.195649185 |
| 3.58239606  | 2.205536563 | 2.533119521 |
| 2.822824399 | 3.358466359 | 2.894089213 |
| 2.001268544 | 4.027210963 | 5.380494117 |
| 7.319783842 | 3.236745629 | 6.657764196 |
| 3.908877984 | 2.145088308 | 3.357985241 |
| 2.536966662 | 2.011207217 | 2.745722866 |
| 2.494246182 | 2.452094152 | 2.679751165 |
| 3.254862531 | 3.632212571 | 1.969319215 |
| 4.324476036 | 2.314971742 | 4.871952215 |

|             |             |             |
|-------------|-------------|-------------|
| 5.034327267 | 3.535856469 | 2.946654116 |
| 3.078303352 | 2.51256269  | 2.075084797 |
| 2.485792423 | 3.210787246 | 2.624453183 |
| 2.484642579 | 2.189449414 | 1.988608552 |
| 4.371861464 | 1.973536575 | 3.12869389  |
| 2.651988374 | 2.384118866 | 4.223130601 |
| 3.6126047   | 4.155877334 | 1.950098272 |
| 2.665311717 | 3.597721072 | 3.149378523 |
| 5.384592867 | 2.697045535 | 1.900697445 |
| 3.395020105 | 1.956640275 | 2.900412904 |
| 3.833172453 | 2.320220497 | 2.082139534 |
| 3.458059573 | 3.296091478 | 1.910443334 |
| 3.722919798 | 3.289108024 | 3.407006659 |
| 2.475324333 | 2.468373641 | 2.059247353 |
| 2.363042691 | 1.898723915 | 3.002124498 |
| 3.161805449 | 2.765915131 | 2.995201104 |
| 4.723664479 | 3.260259094 | 1.988308643 |
| 2.031408155 | 3.049639373 | 5.078742736 |
| 2.728606321 | 2.22205608  | 2.02700739  |
| 3.796909826 | 5.913308134 | 5.185850562 |
| 2.095956119 | 2.927274355 | 1.934667679 |
| 2.234858581 | 2.710433015 | 2.564000551 |
| 3.618662179 | 3.011744534 | 2.334727097 |
| 3.759336955 | 3.400282228 | 2.637448451 |
| 4.878244326 | 2.318196813 | 2.074441357 |
| 2.845141149 | 2.290096959 | 2.939285598 |
| 1.962449722 | 2.725493858 | 3.332574243 |
| 2.089338127 | 3.691122233 | 3.823592673 |
| 2.929216573 | 2.94160974  | 2.099656845 |
| 2.402866981 | 2.151067859 | 3.220751386 |
| 7.647828873 | 5.244557934 | 5.988852775 |
| 2.02080077  | 3.338733095 | 3.014967761 |
| 2.478496038 | 3.045891219 | 2.758005606 |
| 2.962299263 | 3.33223815  | 2.076003128 |
| 3.509586246 | 2.068559813 | 2.310835493 |
| 2.251856533 | 3.389822974 | 2.687553556 |
| 2.556279371 | 1.92424916  | 2.688028659 |
| 4.316729075 | 3.989563385 | 3.571839068 |
| 2.20174543  | 4.31089519  | 3.60287219  |
| 2.130712582 | 2.048004241 | 2.975601432 |
| 2.611466277 | 2.40839925  | 4.312155272 |
| 4.507475317 | 2.005633648 | 4.416973506 |
| 4.704422493 | 3.062422644 | 2.591723159 |
| 1.998624407 | 2.488034962 | 3.476353251 |
| 2.588395388 | 2.0546863   | 2.56965234  |
| 2.551431855 | 2.552543343 | 2.689545645 |



|             |             |             |
|-------------|-------------|-------------|
| 3.076204337 | 3.417571274 | 3.83304971  |
| 2.849544135 | 3.379362362 | 1.991411683 |
| 3.40771473  | 2.014640836 | 3.209769761 |
| 2.225763308 | 4.507578388 | 4.862938826 |
| 2.036303518 | 3.129517835 | 2.919631019 |
| 3.109580175 | 2.809614133 | 2.702603802 |
| 3.666013556 | 2.764391977 | 2.705411262 |
| 3.860022937 | 2.017448204 | 3.530194459 |
| 2.225670942 | 1.975121638 | 2.774259577 |
| 3.172782037 | 2.072386743 | 3.261255964 |
| 3.521261283 | 2.60633455  | 2.705452752 |
| 3.206161018 | 2.174695177 | 2.410173001 |
| 6.336261031 | 2.603455414 | 2.339538133 |
| 2.467028598 | 2.953021948 | 2.233993837 |
| 6.419140916 | 4.297819619 | 5.858456473 |
| 3.201635906 | 2.371028405 | 3.55933921  |
| 2.886728222 | 2.938328618 | 2.480913354 |
| 3.312424336 | 2.722150905 | 1.984870598 |
| 3.363074367 | 3.663687259 | 3.223532621 |
| 3.413996925 | 1.971432864 | 3.00026124  |
| 2.425811732 | 2.963432883 | 2.13238027  |
| 4.210072456 | 4.712014681 | 4.750376661 |
| 3.180194007 | 3.468980639 | 3.008679614 |
| 4.081774929 | 3.962604572 | 4.44908512  |
| 3.048826494 | 2.53145433  | 1.905575716 |
| 2.211824931 | 2.806493879 | 2.695690491 |
| 2.485968201 | 3.175602903 | 4.649905167 |
| 1.95908367  | 3.680570658 | 3.97917317  |
| 4.615943439 | 2.437343606 | 4.36184943  |
| 4.472640275 | 3.083176133 | 2.847059722 |
| 6.577496744 | 4.21696989  | 1.965212828 |
| 3.273681288 | 3.148465451 | 2.097383815 |
| 1.949301187 | 2.262951439 | 3.011359544 |
| 3.684598411 | 2.185699538 | 3.885709941 |
| 5.118723147 | 6.634049174 | 5.491209137 |
| 4.220757854 | 2.364594663 | 4.304219204 |
| 5.623606166 | 2.689931644 | 1.840368703 |
| 3.617594937 | 3.311878154 | 2.368378794 |
| 4.322220639 | 1.855999898 | 4.167184298 |
| 1.991849004 | 3.46660196  | 2.483905458 |
| 3.178814306 | 2.697884265 | 2.819592039 |
| 3.725626161 | 2.067547719 | 4.117860356 |
| 2.541522381 | 2.331557056 | 3.912485342 |
| 2.444261111 | 1.859307409 | 2.125568996 |
| 2.157763083 | 3.341062847 | 2.516351418 |
| 2.531998344 | 1.870100059 | 3.423144791 |

|             |             |             |
|-------------|-------------|-------------|
| 2.316624805 | 2.209299735 | 2.946687048 |
| 3.294799739 | 1.908502438 | 2.552706536 |
| 2.563738229 | 3.390685564 | 3.513376618 |
| 2.93739773  | 2.932348027 | 3.132380547 |
| 5.917202722 | 1.94848269  | 6.087752291 |
| 3.482646271 | 3.849024986 | 2.970499246 |
| 5.31372507  | 3.451394975 | 5.1846884   |
| 2.614027857 | 2.609207827 | 2.496516124 |
| 2.459745177 | 2.537033422 | 2.24992417  |
| 2.251164674 | 3.193644676 | 1.936954637 |
| 4.293506075 | 3.458470322 | 2.123946133 |
| 3.731619248 | 3.673460148 | 3.229261426 |
| 3.349856049 | 3.560823408 | 2.996736675 |
| 2.606086236 | 2.58365507  | 2.801622154 |
| 4.072783389 | 3.304629584 | 2.866904663 |
| 2.028456449 | 3.857583276 | 3.914882439 |
| 2.514913482 | 2.658258833 | 2.370562576 |
| 3.47414757  | 2.615291964 | 2.036460249 |
| 1.940637368 | 2.452702518 | 4.403896988 |
| 4.25884811  | 2.444448894 | 1.860150545 |
| 4.617986292 | 3.199073985 | 2.957233187 |
| 2.690503501 | 2.411362089 | 2.847018092 |
| 1.866938663 | 3.365098653 | 2.870397856 |
| 4.294887782 | 4.130663994 | 3.027417519 |
| 1.866139837 | 2.000394098 | 2.967781553 |
| 2.615196361 | 2.11944173  | 3.479484255 |
| 3.333821343 | 2.467793097 | 1.994264413 |
| 4.509615776 | 3.386110392 | 1.966095227 |
| 3.70297266  | 2.754510322 | 3.205728965 |
| 3.42813527  | 2.463893871 | 2.923422944 |
| 3.386545454 | 3.402763522 | 3.418549643 |
| 2.666574883 | 3.417521981 | 2.167787142 |
| 4.038491594 | 2.636989501 | 1.901307673 |
| 2.844787701 | 2.003322726 | 2.716868947 |
| 3.964666905 | 3.420352558 | 3.729784594 |
| 3.949694236 | 2.114765343 | 2.393980775 |
| 3.256402248 | 2.74666336  | 3.159038605 |
| 2.500464961 | 2.43955605  | 2.369856277 |
| 4.867899841 | 4.75613158  | 3.640807508 |
| 4.889319598 | 3.960912904 | 4.913078194 |
| 2.323528653 | 2.773226366 | 3.399932442 |
| 2.475301933 | 3.061228997 | 4.206132419 |
| 3.329275686 | 3.558771852 | 3.302555889 |
| 1.923203428 | 3.956184337 | 2.213512002 |
| 2.428220817 | 2.311955354 | 2.464135313 |
| 2.087337221 | 2.563223    | 2.526815465 |

|             |             |             |
|-------------|-------------|-------------|
| 3.824176942 | 2.178505664 | 2.379766955 |
| 3.530978486 | 3.127064802 | 3.726494227 |
| 2.589055343 | 3.505179229 | 2.516781589 |
| 2.229116028 | 2.135565831 | 2.054435872 |
| 2.107672599 | 3.1934996   | 2.24423608  |
| 4.518798039 | 2.056385593 | 1.946336095 |
| 2.651043566 | 2.761975568 | 3.151248866 |
| 3.55948511  | 4.363074421 | 1.89192404  |
| 4.679761651 | 1.928237144 | 3.480491329 |
| 2.863194961 | 2.180638806 | 3.211611634 |
| 1.796447153 | 2.328546683 | 2.429784124 |
| 3.193147178 | 2.227428081 | 2.549717633 |
| 3.581446768 | 4.058305551 | 3.702116185 |
| 4.60534076  | 2.90898092  | 5.972539938 |
| 1.78129472  | 3.425152894 | 2.8859368   |
| 4.358100755 | 3.682038456 | 1.972185162 |
| 3.306084574 | 2.558769817 | 3.108378951 |
| 2.277792319 | 2.613779213 | 2.979870105 |
| 7.24054324  | 3.380155685 | 2.671657666 |
| 3.531021967 | 3.13785847  | 2.357125888 |
| 3.099207342 | 2.12184533  | 2.730308543 |
| 2.751498932 | 4.087176242 | 1.859940043 |
| 2.598092864 | 3.070264676 | 2.15881699  |
| 3.493806666 | 4.901313187 | 1.978097742 |
| 2.96405492  | 1.876014774 | 2.018644963 |
| 3.438075274 | 1.939236494 | 3.994206815 |
| 4.663885155 | 3.486866616 | 2.139406617 |
| 3.344988893 | 4.971487305 | 3.907195675 |
| 3.346535891 | 1.840655159 | 2.717256653 |
| 2.198862717 | 2.515919996 | 2.899771456 |
| 3.02148741  | 2.264613414 | 2.741938459 |
| 2.435209135 | 1.985543716 | 3.045905064 |
| 2.373415524 | 2.813327409 | 2.93069012  |
| 2.685237014 | 2.322544022 | 3.273989107 |
| 5.749164058 | 1.837341269 | 6.189342214 |
| 3.805537807 | 2.66795638  | 4.490540142 |
| 2.445327457 | 3.750891056 | 3.383794633 |
| 2.090556868 | 2.395603286 | 1.867964005 |
| 2.745168392 | 2.931323405 | 5.108693274 |
| 5.156598122 | 4.21824759  | 4.35588931  |
| 3.944817079 | 3.657518318 | 2.299244696 |
| 2.347029456 | 2.117064139 | 2.633237896 |
| 2.621898769 | 2.453450956 | 2.079981704 |
| 3.13643204  | 1.961213112 | 2.372058862 |
| 2.510340256 | 2.582891794 | 2.189206718 |
| 3.307150785 | 2.325070388 | 2.64942491  |

|             |             |             |
|-------------|-------------|-------------|
| 3.626909672 | 2.19872652  | 4.019695072 |
| 2.274522354 | 3.554597955 | 2.724361263 |
| 2.259167863 | 2.741368503 | 2.016790746 |
| 4.927228249 | 4.836480191 | 5.462252534 |
| 5.004660748 | 1.909518057 | 4.018700872 |
| 2.626513225 | 3.403233946 | 3.168571329 |
| 2.016054085 | 3.004382362 | 2.444053669 |
| 2.12601403  | 2.346820838 | 2.249115531 |
| 3.807930862 | 3.976746214 | 3.852042302 |
| 3.714891093 | 3.635815682 | 3.462661502 |
| 4.078127427 | 2.803569924 | 2.95380501  |
| 4.20398492  | 3.778235687 | 4.068812505 |
| 2.64929115  | 1.971891785 | 2.978102073 |
| 4.415193953 | 4.035670266 | 1.999723741 |
| 2.415157948 | 2.160024986 | 1.777019909 |
| 2.972454907 | 3.01556662  | 1.996724743 |
| 2.548140232 | 4.553542588 | 2.511755816 |
| 2.703630754 | 1.998815893 | 2.29612053  |
| 4.05941542  | 1.912989634 | 4.644882662 |
| 2.796951113 | 3.935397197 | 2.190514618 |
| 2.877037844 | 1.838404544 | 1.953416059 |
| 3.118601398 | 2.683655062 | 3.02921047  |
| 3.549545615 | 1.820824892 | 3.045491092 |
| 2.62110025  | 3.017588789 | 1.986778165 |
| 4.188715741 | 3.166015578 | 1.862611393 |
| 2.098479795 | 2.17017968  | 1.835947952 |
| 7.162783554 | 5.703389334 | 4.933062413 |
| 2.748471888 | 2.399104542 | 1.974064908 |
| 3.049664821 | 2.631375286 | 2.932300232 |
| 2.505244082 | 2.121712122 | 1.936772175 |
| 1.948097867 | 2.705957985 | 3.42766161  |
| 3.643372145 | 3.103435948 | 4.343402238 |
| 2.399652132 | 2.253192117 | 1.788838848 |
| 2.543710158 | 2.004542326 | 2.0866045   |
| 3.388693531 | 3.702843712 | 4.816545234 |
| 3.441321082 | 2.778543797 | 3.018460846 |
| 2.517532478 | 2.875989267 | 3.168589276 |
| 2.96772247  | 5.041258868 | 3.729612299 |
| 2.69143519  | 2.339614745 | 2.531337729 |
| 2.218353903 | 2.300600526 | 3.243677781 |
| 5.313042809 | 4.993148633 | 4.568179513 |
| 2.066586383 | 3.512651271 | 3.975299701 |
| 2.603680817 | 1.95867072  | 2.047540746 |
| 3.681515212 | 2.610940312 | 2.786964735 |
| 4.261834353 | 3.780002592 | 3.266641576 |
| 1.759356232 | 5.586140542 | 4.675677131 |

|             |             |             |
|-------------|-------------|-------------|
| 3.514470839 | 3.726440094 | 2.700838281 |
| 2.398981063 | 1.846037954 | 1.903694724 |
| 2.131155108 | 2.045050455 | 1.856358799 |
| 2.10872987  | 3.90695637  | 2.798148268 |
| 2.101560359 | 1.909383655 | 1.989664107 |
| 2.67108088  | 2.519410796 | 3.577716133 |
| 4.123432698 | 2.432107235 | 3.683281438 |
| 2.168052829 | 1.960611391 | 2.006218704 |
| 3.803968564 | 2.168233808 | 2.516761295 |
| 2.430602182 | 2.818758174 | 2.918445038 |
| 3.868831733 | 4.190343546 | 5.631483028 |
| 2.905666982 | 2.958421737 | 4.079428677 |
| 1.895901639 | 4.039202213 | 3.585813014 |
| 4.072220591 | 2.86696449  | 2.664593892 |
| 3.854291368 | 7.3964346   | 5.025761071 |
| 3.553388606 | 1.780456342 | 3.094269355 |
| 2.28438555  | 2.293777927 | 2.428706642 |
| 2.836026565 | 3.076056025 | 2.837510318 |
| 2.664362196 | 2.037558128 | 2.888355104 |
| 1.916830886 | 2.991937684 | 3.860585095 |
| 6.259995923 | 6.970536717 | 7.721430173 |
| 3.636200925 | 3.662158342 | 3.306438231 |
| 5.323494649 | 3.168454803 | 3.843665035 |
| 2.972266514 | 2.635426658 | 2.444263484 |
| 3.629676417 | 2.319695005 | 1.96208499  |
| 3.013038666 | 2.788087054 | 2.223049378 |
| 3.260504314 | 2.49888784  | 2.891308842 |
| 3.739617244 | 2.687310886 | 2.080032938 |
| 2.136367143 | 2.352012238 | 2.727313732 |
| 2.862076851 | 3.053659868 | 2.088851903 |
| 2.151288526 | 3.10009466  | 1.791124094 |
| 2.981911961 | 3.027095089 | 3.433219054 |
| 2.781338388 | 2.126324386 | 1.763045171 |
| 2.154983697 | 1.805718799 | 3.702131334 |
| 3.173293026 | 2.472134564 | 2.816613578 |
| 7.514776829 | 1.893101569 | 1.905639637 |
| 2.096139861 | 3.771223992 | 3.344425589 |
| 2.750492908 | 1.901333318 | 1.822797662 |
| 3.016715998 | 2.798582223 | 1.892206272 |
| 1.768837905 | 2.048844844 | 3.452784581 |
| 3.31480677  | 1.778181004 | 2.792965733 |
| 4.667668445 | 4.074113917 | 2.140059626 |
| 2.745725664 | 2.532873276 | 2.144554364 |
| 2.297026458 | 1.724541337 | 2.229428892 |
| 1.746526899 | 4.276969406 | 6.225298555 |
| 1.966554519 | 3.378720864 | 2.288435037 |

|             |             |             |
|-------------|-------------|-------------|
| 1.769714348 | 3.711178662 | 1.847655887 |
| 1.997433944 | 2.778564333 | 2.700228344 |
| 3.427300398 | 2.376663666 | 2.67834628  |
| 3.466195779 | 1.746960116 | 3.432415551 |
| 2.880409553 | 1.826713745 | 2.00174019  |
| 3.04048121  | 1.78269608  | 3.057755439 |
| 1.964121331 | 2.332309175 | 2.200729662 |
| 3.034723677 | 3.28263604  | 3.542432564 |
| 3.207071276 | 2.364661655 | 4.112494104 |
| 3.729691218 | 1.914118116 | 4.101057839 |
| 2.903790529 | 2.559001249 | 2.019113452 |
| 1.891564    | 1.76325409  | 2.076187846 |
| 3.265844437 | 1.791374742 | 3.449276646 |
| 3.208413808 | 1.829885805 | 3.183234677 |
| 4.306282669 | 1.7898431   | 3.233464151 |
| 2.430917571 | 3.185443461 | 2.872984016 |
| 2.042446429 | 2.349181479 | 3.234716639 |
| 1.731504798 | 2.715656766 | 3.599200139 |
| 1.665092578 | 2.403189328 | 2.456079385 |
| 3.313350959 | 1.954674555 | 2.899564035 |
| 6.477530716 | 3.163266088 | 1.945064414 |
| 2.23010211  | 2.729925597 | 3.19270658  |
| 3.026359366 | 2.633906936 | 2.668892497 |
| 3.148826705 | 1.750768778 | 2.465148053 |
| 8.057887538 | 7.147606322 | 8.162853377 |
| 2.41564121  | 2.529806467 | 2.091395989 |
| 2.4464088   | 2.377811942 | 2.658490571 |
| 2.863154544 | 1.690853227 | 1.955572836 |
| 1.86211697  | 2.688400267 | 2.895584829 |
| 1.840950534 | 3.826050477 | 2.808288562 |
| 1.810548005 | 3.726311039 | 2.884032058 |
| 2.832889598 | 1.705877187 | 3.140724341 |
| 2.927542991 | 3.284085592 | 2.666038984 |
| 1.710001899 | 2.28674158  | 2.119287448 |
| 3.725094474 | 2.087788591 | 3.685396322 |
| 3.61970575  | 1.739628134 | 3.084013636 |
| 1.882436107 | 6.518875443 | 6.662829007 |
| 4.417534714 | 1.805038768 | 3.996247252 |
| 2.036494358 | 4.692240955 | 5.744030942 |
| 4.209681389 | 2.984314965 | 3.406964073 |
| 1.736148308 | 2.68358419  | 4.537520509 |
| 1.733959622 | 2.855380964 | 2.176084058 |
| 5.07693972  | 1.759810548 | 3.58885908  |
| 3.062484774 | 2.998043028 | 4.580616552 |
| 4.221884816 | 4.252739838 | 1.948631349 |
| 3.127475257 | 2.742696103 | 2.386452651 |

|             |             |             |
|-------------|-------------|-------------|
| 2.628883115 | 2.631009254 | 3.355107054 |
| 3.009747106 | 1.894186333 | 3.731503592 |
| 5.589168803 | 1.822433326 | 3.575211428 |
| 3.224745001 | 2.12713387  | 3.743163166 |
| 3.176598717 | 2.266872556 | 2.330343056 |
| 3.263638072 | 3.083017109 | 1.738456451 |
| 4.03518489  | 3.659956975 | 1.941731011 |
| 1.678522385 | 5.004354533 | 3.940847009 |
| 2.393575657 | 2.743714557 | 3.45119721  |
| 4.726182904 | 2.148926401 | 4.024881639 |
| 3.839726772 | 3.333955281 | 1.979109854 |
| 4.858436085 | 6.82464771  | 2.631708433 |
| 4.469085388 | 1.699528185 | 4.054331611 |
| 2.835604075 | 2.026037781 | 1.737540959 |
| 1.749327732 | 1.616182667 | 4.185398073 |
| 3.058595875 | 3.33171201  | 2.708294907 |
| 3.409298792 | 2.220049522 | 2.23729659  |
| 2.639198746 | 1.749879573 | 3.016082479 |
| 6.563170818 | 1.724387675 | 8.684954113 |
| 5.349090906 | 1.669576476 | 2.531038918 |
| 1.726688568 | 3.854080798 | 5.347556329 |
| 3.393861574 | 3.828612695 | 2.65776234  |
| 2.871289048 | 2.942415514 | 1.977111023 |
| 2.518038896 | 1.730373956 | 2.777307801 |
| 2.642265914 | 2.200541245 | 2.796222988 |
| 5.762093657 | 4.825709476 | 1.816528883 |
| 1.74499653  | 1.7007524   | 2.297186109 |
| 4.484699731 | 4.28686962  | 5.006568175 |
| 4.257558473 | 2.283668012 | 1.766745451 |
| 2.342733594 | 1.872343929 | 3.924892225 |
| 4.552661856 | 2.66501311  | 3.751664442 |
| 1.708545984 | 3.032429352 | 6.965713743 |
| 1.616138329 | 2.28131332  | 1.930948387 |
| 4.290747315 | 3.668245559 | 2.390099391 |
| 4.703635983 | 4.958941763 | 3.78748485  |
| 1.749138893 | 4.378618774 | 3.534888118 |
| 4.17066287  | 1.843037323 | 2.703079029 |
| 3.095238007 | 2.38847175  | 1.737146596 |
| 3.937902832 | 2.788606888 | 2.014147567 |
| 1.72561288  | 1.833333933 | 2.817364699 |
| 2.585094558 | 3.258197545 | 2.116262324 |
| 1.980363923 | 2.47617201  | 2.735870997 |
| 6.244042368 | 3.290496164 | 1.576869923 |
| 3.416394883 | 3.103750144 | 1.76890313  |
| 1.866362066 | 2.14846214  | 2.685955348 |
| 3.506528178 | 1.801132342 | 2.539494241 |

|             |             |             |
|-------------|-------------|-------------|
| 2.031699327 | 2.90452549  | 2.36213055  |
| 2.481072548 | 2.386727498 | 2.105398262 |
| 2.741385707 | 3.337760497 | 2.158064604 |
| 4.405846655 | 4.133733553 | 2.676702845 |
| 5.441050827 | 5.585967066 | 1.709965449 |
| 2.675646217 | 3.602070588 | 3.150521251 |
| 2.623579646 | 2.007828451 | 1.662061369 |
| 5.733811059 | 5.468811164 | 5.414890182 |
| 3.443853281 | 2.45064692  | 1.869678562 |
| 3.004809532 | 1.783661001 | 3.289802681 |
| 2.723829097 | 2.226776949 | 2.135005563 |
| 2.710713661 | 1.727112734 | 3.743424295 |
| 2.184199244 | 2.35450334  | 2.357727282 |
| 2.223590129 | 3.033623472 | 2.943344389 |
| 2.137403443 | 2.311394497 | 2.482655668 |
| 4.271620783 | 1.810156526 | 3.690662565 |
| 2.999278678 | 2.590791166 | 1.665254385 |
| 2.472648956 | 1.997793454 | 3.266646403 |
| 2.254397942 | 1.797864802 | 2.519557951 |
| 1.845996781 | 2.04161576  | 2.296496523 |
| 2.202126317 | 1.94466203  | 2.100266236 |
| 3.5018052   | 3.542590694 | 1.846671255 |
| 2.682403196 | 2.238215583 | 2.010976694 |
| 2.356745752 | 1.619924717 | 3.262894492 |
| 3.726044905 | 3.027699875 | 2.755393854 |
| 2.206424737 | 2.6334863   | 2.296888843 |
| 1.865782307 | 7.472328535 | 6.22479029  |
| 5.392125219 | 2.939251642 | 5.149467653 |
| 2.931526466 | 2.10547449  | 2.564009655 |
| 1.591139922 | 2.715154254 | 2.510433616 |
| 2.351719592 | 2.709903924 | 1.657913176 |
| 2.775547017 | 1.603053466 | 2.730237499 |
| 3.133752717 | 1.654406507 | 2.071667149 |
| 5.555912457 | 3.678975245 | 1.951994705 |
| 4.866769993 | 1.584879269 | 2.770780325 |
| 2.174573569 | 2.225546062 | 1.853699263 |
| 2.301023229 | 1.88454495  | 2.139775962 |
| 1.784280193 | 2.368357638 | 2.471352975 |
| 2.202569553 | 3.272779595 | 6.887008019 |
| 3.339174115 | 2.488556701 | 3.749187826 |
| 4.466338504 | 3.409756366 | 4.544007409 |
| 2.960833051 | 1.756903889 | 2.400686338 |
| 1.85672317  | 3.298915084 | 2.976806511 |
| 2.570823867 | 2.094414581 | 2.299461186 |
| 4.053602187 | 1.639797466 | 2.78304134  |
| 2.305395216 | 2.053138756 | 1.667758604 |



|             |             |             |
|-------------|-------------|-------------|
| 3.539359843 | 3.700594104 | 2.946104297 |
| 6.039661196 | 5.01130182  | 4.100033938 |
| 2.335279777 | 2.120058916 | 2.192685235 |
| 3.181000271 | 2.161185714 | 3.357396562 |
| 2.616967686 | 2.753160873 | 2.762121966 |
| 1.805160152 | 3.36974463  | 1.891662084 |
| 1.752986802 | 2.570120897 | 3.196909962 |
| 5.278679896 | 2.93702142  | 3.807541208 |
| 1.53678305  | 3.735727039 | 3.755590655 |
| 3.122467678 | 3.11795286  | 3.302378435 |
| 5.444298573 | 1.854429235 | 3.655030239 |
| 3.44877048  | 1.852651062 | 2.610847168 |
| 3.104514679 | 1.687854662 | 2.057038406 |
| 1.78202975  | 3.321286814 | 2.63425413  |
| 1.824008307 | 2.757099604 | 3.25489644  |
| 2.12410985  | 3.644947911 | 3.257989333 |
| 2.537603358 | 2.457150979 | 2.483864481 |
| 3.703619421 | 3.660434521 | 2.454399427 |
| 2.559853824 | 2.144745573 | 1.841204079 |
| 2.959919149 | 2.079727343 | 1.720143754 |
| 3.402652585 | 6.037633289 | 3.396589009 |
| 2.506043001 | 2.263878703 | 2.221556249 |
| 1.764878556 | 2.634823278 | 4.02859103  |
| 2.909530582 | 3.132831785 | 2.186917088 |
| 4.4867384   | 1.528377226 | 2.508824472 |
| 3.047009217 | 2.827037386 | 2.80235005  |
| 4.603546486 | 4.700394362 | 2.244150877 |
| 2.954945389 | 2.994258098 | 2.367694141 |
| 2.642440725 | 3.327779805 | 4.572922662 |
| 4.699737863 | 3.6205191   | 4.566386925 |
| 2.298608977 | 1.581083218 | 2.106084835 |
| 2.771287253 | 2.639253948 | 1.870550333 |
| 6.913096259 | 2.415658877 | 4.428560865 |
| 2.170463018 | 1.68571662  | 2.250528888 |
| 1.614016054 | 1.940681517 | 2.503610833 |
| 4.127102956 | 3.555206012 | 3.919553678 |
| 2.423122963 | 1.74423908  | 1.756465204 |
| 2.370446311 | 1.748786225 | 3.058500715 |
| 1.687490512 | 2.287222814 | 3.049191908 |
| 3.993558864 | 2.210223318 | 2.213298533 |
| 1.80024353  | 4.080493202 | 4.379172421 |
| 3.316562775 | 1.578079969 | 1.700838136 |
| 2.144859875 | 1.991316758 | 1.691068715 |
| 3.413791739 | 2.652706578 | 3.346825173 |
| 3.854617483 | 3.380462427 | 2.99975039  |
| 3.073562794 | 2.003228404 | 3.781451366 |

|             |             |             |
|-------------|-------------|-------------|
| 3.953383815 | 3.594091888 | 5.181004907 |
| 4.828853182 | 2.046588314 | 3.694334504 |
| 2.714727339 | 2.456263338 | 1.826659886 |
| 1.649584264 | 2.146737634 | 2.622131701 |
| 2.640344567 | 3.769066089 | 2.537029602 |
| 1.664610943 | 2.766795753 | 5.258951579 |
| 1.537345243 | 1.820629938 | 2.441468696 |
| 3.268616885 | 2.458902301 | 3.263344391 |
| 3.067866719 | 2.193085602 | 2.112445932 |
| 3.976743893 | 2.865391184 | 2.885363767 |
| 2.998227904 | 2.136711765 | 2.699803656 |
| 1.829268933 | 4.079303323 | 3.683552517 |
| 2.283436643 | 4.475503826 | 4.814474098 |
| 1.619883736 | 4.791314139 | 3.126005603 |
| 1.611152578 | 2.419240165 | 2.681016096 |
| 3.286462518 | 3.365098787 | 3.702695566 |
| 4.481024946 | 3.401738472 | 4.223959087 |
| 3.250301159 | 2.960297335 | 2.796365507 |
| 4.067400878 | 6.408631885 | 2.956796033 |
| 3.936154089 | 2.854310407 | 3.691114999 |
| 2.558597882 | 2.49843029  | 2.297191508 |
| 2.254434712 | 1.999912694 | 2.618909576 |
| 2.409477064 | 1.721656355 | 2.482288006 |
| 1.811164066 | 2.449932852 | 4.349072031 |
| 5.291196695 | 1.531441188 | 4.091120194 |
| 3.529702532 | 2.917665225 | 2.456302005 |
| 2.917502481 | 3.044287829 | 3.985486178 |
| 2.385932043 | 1.660666594 | 5.236907995 |
| 3.214844778 | 3.767879405 | 3.474726316 |
| 1.562302284 | 2.754572954 | 2.985393849 |
| 2.128422218 | 1.850193238 | 3.038336096 |
| 4.217811329 | 2.884809672 | 1.845396755 |
| 2.324729101 | 2.643231247 | 2.325528295 |
| 3.688883169 | 3.858887705 | 2.359447285 |
| 4.573430256 | 3.002230842 | 4.01433954  |
| 3.874955782 | 3.144395943 | 1.667281605 |
| 4.269758053 | 1.582731147 | 3.088954578 |
| 2.258889773 | 1.799383774 | 1.703212049 |
| 3.23284394  | 2.751517089 | 3.641964427 |
| 4.156462202 | 1.661027433 | 2.503385142 |
| 1.506303328 | 3.785340193 | 3.715734186 |
| 3.510207407 | 2.272455023 | 1.800551383 |
| 7.323419162 | 3.007542803 | 3.377197438 |
| 3.495430675 | 2.974301792 | 2.782558208 |
| 3.543891595 | 2.17283964  | 3.675516802 |
| 1.603440659 | 5.484882985 | 5.781415492 |

|             |             |             |
|-------------|-------------|-------------|
| 2.816701816 | 1.761895901 | 3.95560653  |
| 1.554576012 | 2.438748763 | 2.822381022 |
| 3.373328937 | 1.938911676 | 2.099447327 |
| 1.629274488 | 4.056786069 | 3.427708637 |
| 2.265412727 | 2.474380693 | 2.591726018 |
| 1.639005813 | 3.928265776 | 4.784926146 |
| 2.233445655 | 2.284221965 | 2.789153234 |
| 2.121630502 | 5.444454974 | 1.763193326 |
| 3.668599809 | 3.256992037 | 1.85483925  |
| 3.807663078 | 3.158318383 | 3.394903528 |
| 3.176772084 | 3.200336391 | 2.431711911 |
| 2.063489783 | 1.751861687 | 1.756841502 |
| 3.48581218  | 1.688191177 | 2.112318497 |
| 2.576271792 | 3.583311332 | 4.921909703 |
| 3.022306651 | 3.324040157 | 1.623836899 |
| 1.742838735 | 2.590882952 | 2.048326786 |
| 7.127480497 | 1.802181113 | 3.040010773 |
| 1.678003779 | 2.664716391 | 2.17423329  |
| 2.868947313 | 1.731933651 | 2.989560761 |
| 2.10584673  | 5.314158461 | 3.845904631 |
| 2.946514957 | 4.378897814 | 2.274610041 |
| 2.828728012 | 1.571290421 | 2.409524638 |
| 5.439198729 | 2.829517297 | 3.293563881 |
| 1.593578269 | 2.960209652 | 2.67495053  |
| 2.276152864 | 1.605282025 | 2.046842352 |
| 2.240078098 | 2.103288147 | 2.079148202 |
| 2.318694323 | 2.094387353 | 2.075174292 |
| 1.492282218 | 4.691940483 | 2.263609921 |
| 2.596841294 | 1.652325135 | 2.005039598 |
| 2.546570397 | 1.728688539 | 2.556724794 |
| 1.485353321 | 1.864503541 | 2.535318099 |
| 3.672014471 | 4.044879966 | 2.866805215 |
| 2.115278011 | 2.233139866 | 3.134610877 |
| 5.079678041 | 2.579123188 | 1.842193507 |
| 2.416671183 | 1.760134645 | 1.747270625 |
| 1.843048153 | 2.195859814 | 1.564892362 |
| 2.587586182 | 2.337209518 | 2.254878461 |
| 2.967857226 | 1.494352986 | 3.893730247 |
| 5.205966667 | 1.633253694 | 4.907406272 |
| 3.141345633 | 3.475162857 | 2.268947808 |
| 1.974975676 | 1.935883944 | 1.549269364 |
| 1.661085252 | 2.211890799 | 3.327091569 |
| 2.307786057 | 3.774819014 | 2.237013391 |
| 2.987465033 | 1.769211715 | 2.110113792 |
| 2.278448013 | 1.838256746 | 2.009106501 |
| 3.236133441 | 1.464527164 | 2.666646129 |

|             |             |             |
|-------------|-------------|-------------|
| 4.616666532 | 1.575355412 | 2.013612792 |
| 2.717635219 | 1.880988469 | 2.789410503 |
| 3.008740279 | 3.521885938 | 1.707176264 |
| 2.72959043  | 2.811748959 | 2.352844783 |
| 1.815495002 | 2.318357472 | 2.625231323 |
| 2.447607978 | 3.063078753 | 3.096952903 |
| 4.571298172 | 3.885641428 | 4.36370602  |
| 2.529867268 | 2.167112588 | 1.783015851 |
| 3.287516548 | 2.091820054 | 2.728645493 |
| 4.460480068 | 2.073441122 | 4.546779518 |
| 1.631845093 | 2.653304907 | 4.92640189  |
| 3.620049325 | 1.492018201 | 4.346809971 |
| 4.059843951 | 1.57760336  | 3.946064649 |
| 2.614364521 | 2.117339156 | 1.967185567 |
| 2.329211459 | 1.788027582 | 5.039622469 |
| 4.773634291 | 1.473156703 | 6.851465007 |
| 3.870998621 | 1.510717126 | 3.493126534 |
| 3.154691533 | 2.793389008 | 3.113996588 |
| 2.531299812 | 2.321390796 | 3.09465096  |
| 5.164166326 | 1.78134601  | 2.90225028  |
| 2.557777173 | 1.54265272  | 2.054711092 |
| 1.929670045 | 2.113747816 | 1.816548629 |
| 4.102065314 | 2.752546776 | 3.716395628 |
| 2.819482997 | 3.653162663 | 3.124722506 |
| 2.251574355 | 2.372080204 | 1.973521204 |
| 1.709309346 | 1.990104069 | 5.855933501 |
| 4.831002085 | 3.814116812 | 1.561866345 |
| 3.518833483 | 1.66800471  | 3.952023333 |
| 5.255135474 | 2.505697196 | 2.613332206 |
| 2.182901292 | 3.975343045 | 2.358383861 |
| 2.536618419 | 2.504259654 | 1.635071317 |
| 6.259042204 | 5.59491387  | 1.595497978 |
| 2.859224741 | 4.842179841 | 3.431858198 |
| 2.988144582 | 1.721120405 | 1.620690702 |
| 3.638229851 | 1.958183067 | 3.64608897  |
| 4.255491533 | 2.291963726 | 3.476179162 |
| 3.732388018 | 3.216411554 | 4.124770806 |
| 2.305077022 | 1.990572128 | 2.229647311 |
| 4.34762707  | 2.784070664 | 1.461678587 |
| 4.726031013 | 3.41347916  | 4.309683144 |
| 4.179166495 | 3.628451472 | 3.319924804 |
| 3.144426824 | 1.476431936 | 2.521769259 |
| 2.306280525 | 2.255110739 | 1.589086039 |
| 3.470569223 | 1.464002449 | 2.291703382 |
| 2.727714163 | 2.408896794 | 2.213886501 |
| 1.628115768 | 3.851544294 | 4.069183199 |

|             |             |             |
|-------------|-------------|-------------|
| 3.700545401 | 1.408869812 | 3.088507408 |
| 1.747027247 | 2.546477478 | 1.550514952 |
| 2.538219928 | 2.740150938 | 1.569371748 |
| 2.187669124 | 2.6901659   | 2.609913977 |
| 1.652979115 | 1.852399659 | 2.158678141 |
| 2.828113753 | 2.283602013 | 2.537192441 |
| 2.325394656 | 2.485164565 | 1.718993659 |
| 3.806330677 | 4.580119874 | 3.655509372 |
| 2.128242751 | 3.086540497 | 1.812755642 |
| 1.50407751  | 1.878261587 | 1.855916385 |
| 2.751613888 | 2.05954732  | 3.826674209 |
| 3.681544417 | 1.570901774 | 3.769753517 |
| 2.640446683 | 1.821894615 | 1.89319391  |
| 2.869972341 | 1.727987174 | 2.734131732 |
| 2.15845137  | 1.4285205   | 1.744574117 |
| 4.068566065 | 4.244087042 | 1.776346611 |
| 4.837829355 | 8.002704323 | 7.747252083 |
| 1.780219511 | 1.770141083 | 2.092456128 |
| 3.227457607 | 2.815558694 | 3.386997183 |
| 1.978214541 | 2.944028709 | 2.187832736 |
| 2.460956855 | 2.254824238 | 1.785359312 |
| 2.918017612 | 2.145272676 | 1.846497352 |
| 3.883911605 | 3.790938424 | 3.726221512 |
| 2.778531974 | 3.585089658 | 1.525882816 |
| 2.926884363 | 2.297719294 | 2.909123305 |
| 2.522232494 | 1.774601116 | 3.71054744  |
| 2.299223164 | 1.961021237 | 2.129446737 |
| 2.334444442 | 2.424620136 | 2.639456316 |
| 2.082406335 | 1.733927388 | 2.419543535 |
| 3.419500425 | 2.045258597 | 3.105938704 |
| 2.942402093 | 3.167397052 | 1.639544621 |
| 2.448546514 | 2.236824951 | 1.695014495 |
| 4.160115067 | 3.292838785 | 2.173985369 |
| 2.823329608 | 1.653984081 | 1.808771943 |
| 3.821788476 | 3.083720786 | 3.376489949 |
| 2.184409958 | 2.503830199 | 2.159854135 |
| 1.954518709 | 1.665770215 | 1.545890531 |
| 3.296127358 | 3.886020403 | 3.283397467 |
| 3.637829945 | 2.76774114  | 1.672268522 |
| 2.116841598 | 2.495255515 | 1.651821761 |
| 2.68864443  | 1.538778588 | 3.122356686 |
| 2.392176922 | 2.14783121  | 1.523102133 |
| 1.458785837 | 4.370006529 | 5.983028606 |
| 2.960461282 | 1.609230295 | 2.007129416 |
| 3.79873692  | 3.149114112 | 2.963403452 |
| 2.194718697 | 1.848170393 | 2.423649924 |

|             |             |             |
|-------------|-------------|-------------|
| 3.799689147 | 1.467601405 | 3.473886737 |
| 2.52345377  | 2.099287686 | 3.246969476 |
| 2.113097577 | 3.712180706 | 1.546704732 |
| 3.621685374 | 3.278391677 | 1.413292    |
| 3.539982141 | 2.116910085 | 3.325262768 |
| 3.356611282 | 3.586721827 | 2.236055402 |
| 5.104746281 | 4.989033168 | 9.269189204 |
| 2.138722041 | 2.441418125 | 3.298568699 |
| 2.863335023 | 2.260150751 | 1.758245773 |
| 2.6715041   | 2.014222932 | 1.333529676 |
| 2.72692742  | 2.545485461 | 1.626452398 |
| 2.331340918 | 1.812946208 | 1.565849062 |
| 4.314458355 | 1.748145571 | 2.358323347 |
| 4.09287139  | 2.720410133 | 3.936574213 |
| 3.338481226 | 1.34352844  | 1.619937781 |
| 1.608658396 | 2.318355609 | 2.29596251  |
| 5.11217747  | 3.482767677 | 3.786839199 |
| 2.881756855 | 2.535683992 | 3.096151354 |
| 2.127367741 | 1.597497896 | 2.190145996 |
| 3.606638718 | 2.78904664  | 1.604259139 |
| 4.29930219  | 3.9695024   | 3.937330736 |
| 4.888698916 | 4.688017205 | 3.908791811 |
| 1.892845735 | 2.465595933 | 2.594809381 |
| 2.455453242 | 2.792605651 | 4.017542063 |
| 1.805023786 | 4.52027762  | 1.712366849 |
| 3.185376446 | 1.459423266 | 2.446892759 |
| 2.312453395 | 1.622771929 | 1.93691267  |
| 1.923748628 | 4.208051269 | 1.569591975 |
| 2.927929488 | 3.249008847 | 2.739267697 |
| 2.750265977 | 2.905174827 | 3.276883534 |
| 2.080558541 | 2.125380142 | 1.972733399 |
| 3.320050519 | 3.404002365 | 2.338115219 |
| 2.996701689 | 1.848299283 | 2.174612716 |
| 1.947390612 | 1.959545032 | 2.886448141 |
| 1.55977814  | 2.780856355 | 3.459771575 |
| 3.730262576 | 5.378463379 | 3.96380703  |
| 3.063734022 | 2.202422152 | 1.74912077  |
| 1.560779894 | 2.709764142 | 2.701873879 |
| 1.373450113 | 2.250937199 | 2.318188975 |
| 4.89349864  | 4.253514143 | 4.577868251 |
| 2.487024593 | 2.359363605 | 2.951148617 |
| 1.438406021 | 1.885086259 | 1.613178299 |
| 3.261779051 | 2.59293469  | 2.147939552 |
| 1.966034426 | 2.209253426 | 2.136484436 |
| 2.61330557  | 1.363021532 | 2.985985489 |
| 2.295453944 | 1.758190847 | 2.205493145 |

|             |             |             |
|-------------|-------------|-------------|
| 1.388568331 | 1.813451993 | 5.026895258 |
| 3.333736302 | 1.459589168 | 3.057464278 |
| 1.576264734 | 2.653420928 | 4.533345751 |
| 3.694676282 | 1.772378519 | 5.64109731  |
| 1.400730486 | 2.988446793 | 3.731016013 |
| 4.471119815 | 2.961000501 | 1.672594051 |
| 2.115741003 | 1.598434705 | 2.881557571 |
| 4.523460887 | 2.468026787 | 1.448236558 |
| 2.058107123 | 1.939690325 | 3.093926881 |
| 2.967526592 | 3.009760205 | 2.495339148 |
| 2.020805648 | 1.899919846 | 1.882941508 |
| 1.649185417 | 1.3503979   | 2.32528097  |
| 4.724781513 | 1.674894333 | 1.649542561 |
| 2.754499505 | 3.751952059 | 3.051417448 |
| 2.525046589 | 2.210770748 | 1.780487842 |
| 1.950593358 | 1.469230612 | 1.905977895 |
| 2.595227257 | 2.117171453 | 2.25589985  |
| 1.956771131 | 2.532281294 | 2.624442346 |
| 2.320413715 | 3.592763668 | 3.929696081 |
| 3.168106385 | 3.642014754 | 6.421794401 |
| 3.972536457 | 3.188593548 | 1.610752448 |
| 4.242277362 | 2.84904925  | 2.1625506   |
| 3.900647649 | 2.382741186 | 1.848762715 |
| 6.945885325 | 4.76732247  | 1.474487755 |
| 1.663048595 | 1.679838371 | 2.012836554 |
| 1.259841054 | 2.927300283 | 3.765436364 |
| 2.566061886 | 2.197865856 | 3.033526025 |
| 3.785145061 | 3.529184654 | 1.435155215 |
| 1.423906749 | 1.647289332 | 1.609557787 |
| 3.979136263 | 1.296481517 | 2.856242758 |
| 2.574021339 | 1.651228278 | 2.069971336 |
| 2.339331287 | 2.64396005  | 1.416674559 |
| 4.759708237 | 3.17054734  | 2.892071689 |
| 3.382765037 | 1.428470253 | 1.543704782 |
| 1.339043462 | 3.471228709 | 2.268511019 |
| 2.150244673 | 1.424746894 | 1.477256151 |
| 2.295705051 | 2.169295588 | 1.293867476 |
| 2.976198563 | 2.468724583 | 2.194602933 |
| 2.716368003 | 1.869154488 | 1.324831041 |
| 1.41126614  | 2.995884368 | 2.680644458 |
| 2.13583621  | 1.627273518 | 2.801118073 |
| 3.62042073  | 1.25297469  | 1.565179307 |
| 2.944054841 | 2.09297423  | 3.064285958 |
| 4.058155276 | 2.0878574   | 3.420254801 |
| 3.552443363 | 3.033682247 | 1.705483359 |
| 2.29753132  | 2.333197843 | 1.498826428 |

|             |             |             |
|-------------|-------------|-------------|
| 1.292893164 | 2.073990438 | 2.539559863 |
| 1.494467482 | 1.645809412 | 3.213776009 |
| 1.624674948 | 1.965914771 | 2.829227439 |
| 2.864580475 | 2.289005434 | 3.335123597 |
| 3.685466325 | 3.530561033 | 3.251134857 |
| 2.538082397 | 1.303452835 | 2.293276527 |
| 1.737280645 | 1.336535014 | 1.838909707 |
| 1.877560826 | 2.457751609 | 1.419717251 |
| 4.714441574 | 2.161892294 | 3.637442055 |
| 1.563075417 | 2.466718442 | 2.681129752 |
| 3.770004135 | 2.739274745 | 3.898811773 |
| 5.195258547 | 5.111091628 | 4.052353132 |
| 1.267929801 | 1.981575971 | 1.589279144 |
| 4.122960684 | 2.727919794 | 1.912843587 |
| 2.507226729 | 2.933759102 | 2.419923561 |
| 5.025784479 | 4.101310832 | 4.804958846 |
| 3.541518383 | 2.572489154 | 3.466851802 |
| 3.567211965 | 3.069490386 | 1.332016036 |
| 3.031492653 | 3.509310375 | 3.470657094 |
| 3.929906899 | 3.904987978 | 3.639076422 |
| 3.176151427 | 1.31809367  | 2.143457687 |
| 4.22745054  | 1.859894264 | 1.316376601 |
| 1.744626395 | 1.502680001 | 2.065455122 |
| 3.344181472 | 3.064008054 | 5.677024975 |
| 1.236020657 | 2.624091479 | 1.94715887  |
| 2.001092309 | 1.893746663 | 1.726289044 |
| 2.603719503 | 3.564316313 | 1.676319289 |
| 3.411916591 | 2.534805452 | 2.051749506 |
| 3.452699691 | 1.740971145 | 1.222415427 |
| 2.92483584  | 1.435682086 | 2.548844625 |
| 1.196108789 | 3.383406782 | 4.071113882 |
| 1.292193869 | 2.414581433 | 1.797953392 |
| 1.445152715 | 2.944863855 | 3.137530509 |
| 3.288216187 | 1.643073242 | 2.200448646 |
| 3.172043697 | 2.490008648 | 3.016320956 |
| 3.327446581 | 1.449744326 | 2.267012973 |
| 2.910156838 | 2.40322647  | 4.264385234 |
| 8.525722012 | 6.910029026 | 2.09462926  |
| 2.132296321 | 2.185885588 | 1.591807287 |
| 2.091438108 | 3.303668085 | 3.627837188 |
| 1.431484921 | 1.977704745 | 3.719194584 |
| 2.48160626  | 2.175105461 | 1.482435585 |
| 1.463300145 | 1.447354265 | 1.934557261 |
| 3.310394754 | 1.410847018 | 3.589055486 |
| 1.334822209 | 4.100316537 | 5.123421522 |
| 2.362773436 | 2.022782015 | 2.204935376 |



|             |             |             |
|-------------|-------------|-------------|
| 2.817125787 | 3.271258321 | 2.893462595 |
| 2.25303438  | 1.597026871 | 1.447740232 |
| 4.498018008 | 1.624627755 | 3.263876095 |
| 1.247636301 | 2.290956813 | 2.685760456 |
| 7.178300159 | 5.179234564 | 4.63242784  |
| 1.250399546 | 4.983898392 | 2.775620807 |
| 3.374222677 | 2.529392153 | 2.595076932 |
| 2.50993193  | 1.321212711 | 3.075856094 |
| 3.824163076 | 3.069414374 | 2.719770127 |
| 2.285718886 | 2.275029288 | 3.450472254 |
| 3.335710031 | 1.25854105  | 2.050521109 |
| 3.430258697 | 2.664524626 | 1.397275668 |
| 3.257587338 | 1.860987406 | 2.885264827 |
| 2.306157158 | 1.442799917 | 1.512502105 |
| 1.346290364 | 2.859991525 | 1.581219692 |
| 3.407754998 | 1.192340725 | 3.034382922 |
| 7.01211663  | 5.113895404 | 1.528584952 |
| 3.521453519 | 3.371084589 | 2.438495811 |
| 2.333649436 | 1.82603205  | 3.30887323  |
| 3.030693367 | 1.881526465 | 2.060568152 |
| 2.004717443 | 1.398391743 | 2.785839358 |
| 1.271198276 | 1.94000278  | 2.198733058 |
| 1.802694668 | 1.765433518 | 1.723043249 |
| 3.09989035  | 2.568448549 | 1.402461848 |
| 4.200567385 | 3.549915358 | 4.654740338 |
| 3.372384289 | 3.470503665 | 1.819299611 |
| 2.558507187 | 1.213913287 | 1.815321805 |
| 1.855162274 | 3.272215664 | 1.452214502 |
| 2.587358226 | 1.941732065 | 2.615341669 |
| 1.607405572 | 1.353898598 | 1.906696697 |
| 2.944523567 | 1.774177796 | 1.308199606 |
| 3.837813955 | 2.035556918 | 3.773127329 |
| 3.027907733 | 2.046479498 | 1.880581405 |
| 1.180234842 | 2.959477112 | 1.608495339 |
| 2.414574609 | 1.803036766 | 1.393461913 |
| 3.926548707 | 5.037143707 | 5.849048814 |
| 3.445155556 | 2.493409788 | 4.05870796  |
| 2.598387087 | 2.336016921 | 2.645184309 |
| 2.792307703 | 2.183445221 | 2.477217869 |
| 2.036582016 | 2.445741715 | 3.025924459 |
| 2.479479737 | 1.980821441 | 2.177253003 |
| 2.280907736 | 1.172960927 | 2.405680778 |
| 2.12012536  | 1.644877565 | 1.371583923 |
| 2.318829241 | 2.067786169 | 2.488397258 |
| 8.270617893 | 4.686942459 | 5.604370185 |
| 3.056158888 | 1.435407157 | 2.521037801 |

|             |             |             |
|-------------|-------------|-------------|
| 3.430948001 | 2.798552902 | 1.197568011 |
| 2.231320743 | 1.160142676 | 2.923872182 |
| 2.556035648 | 1.18273588  | 1.715263229 |
| 3.119341236 | 2.255930406 | 1.384561388 |
| 2.931948888 | 3.136657312 | 3.252132255 |
| 1.810195403 | 1.849516497 | 1.274724307 |
| 2.755991511 | 3.358454498 | 4.233851308 |
| 1.684799223 | 1.634081698 | 1.423776927 |
| 2.301333275 | 1.267236973 | 2.860608315 |
| 1.845356528 | 2.007218253 | 1.751520439 |
| 3.07246101  | 1.287685166 | 3.708026722 |
| 1.698799524 | 2.01247579  | 1.984884096 |
| 1.330924104 | 2.615835058 | 4.35467139  |
| 5.323409876 | 1.217215547 | 5.283048113 |
| 2.380334865 | 2.982398632 | 2.537096342 |
| 1.563806577 | 1.628250737 | 1.824892425 |
| 3.4043805   | 2.163242002 | 1.240438814 |
| 2.868008559 | 1.320950771 | 4.539694652 |
| 2.25355086  | 1.931144102 | 2.371211708 |
| 4.153213142 | 3.744511455 | 1.238773625 |
| 1.568864624 | 3.07630494  | 1.531274519 |
| 5.099944736 | 2.206517674 | 1.254968146 |
| 2.52559965  | 1.48613561  | 1.684248633 |
| 2.509790633 | 2.548832288 | 3.24870942  |
| 1.673901428 | 1.185906019 | 3.190449021 |
| 1.237691872 | 3.077666949 | 2.734655356 |
| 2.910154842 | 2.764932387 | 1.929224563 |
| 1.905566764 | 1.835567614 | 4.32889129  |
| 1.541042362 | 1.618769431 | 2.490365834 |
| 3.898006186 | 3.276960959 | 2.810869495 |
| 2.439582048 | 1.920425305 | 2.371279045 |
| 3.102450857 | 3.373034429 | 1.592340468 |
| 2.549654025 | 1.350834327 | 3.578296838 |
| 2.993837392 | 1.930129924 | 1.718277348 |
| 3.564640278 | 3.068304742 | 4.3067538   |
| 1.344516814 | 2.349538223 | 2.727815518 |
| 2.939849998 | 2.394588383 | 1.408866263 |
| 2.519383053 | 1.858919188 | 1.620398311 |
| 2.856982816 | 2.716239888 | 2.188084854 |
| 4.348708684 | 2.48122581  | 2.584145137 |
| 4.022303115 | 4.954082148 | 1.22986998  |
| 3.718655203 | 1.538346216 | 2.652421854 |
| 3.667149267 | 1.60796066  | 2.867429557 |
| 2.575324235 | 1.718846119 | 3.643684659 |
| 3.14220576  | 2.424753254 | 3.153933069 |
| 1.662528886 | 2.22973411  | 2.188581834 |

|             |             |             |
|-------------|-------------|-------------|
| 1.524592949 | 2.60361454  | 3.952881191 |
| 2.025074287 | 1.748931851 | 1.87029406  |
| 1.807204605 | 2.158744382 | 1.488264114 |
| 3.959613067 | 3.328811136 | 3.362006917 |
| 5.352337283 | 3.418889665 | 1.108698029 |
| 1.562862791 | 1.533591245 | 2.624342049 |
| 2.255093301 | 3.534386752 | 2.060390109 |
| 4.328277484 | 1.158161759 | 4.141970268 |
| 1.836340819 | 3.797295559 | 1.621455069 |
| 2.017036441 | 3.003638236 | 3.01508533  |
| 2.273235271 | 1.715609113 | 1.229873339 |
| 4.642139053 | 3.275646482 | 4.906169526 |
| 4.763185916 | 4.17220518  | 4.661864965 |
| 3.816616392 | 2.223175538 | 2.980097333 |
| 3.203337058 | 2.132083859 | 3.182553861 |
| 2.927666038 | 1.238182583 | 2.255821048 |
| 2.042063753 | 1.594064083 | 4.054104057 |
| 2.044163527 | 1.535852468 | 2.140233998 |
| 4.207250133 | 4.108067998 | 3.747597745 |
| 2.919201801 | 1.598579437 | 1.601964219 |
| 1.484147952 | 1.390899414 | 1.472106281 |
| 2.817024077 | 1.531404956 | 2.639539012 |
| 7.796877549 | 1.117074391 | 8.791132517 |
| 1.195421725 | 3.894874883 | 3.357341025 |
| 2.647201788 | 2.214349497 | 2.574339797 |
| 3.676309078 | 3.077658912 | 1.476896078 |
| 2.37668111  | 1.901824199 | 1.9937298   |
| 2.593811366 | 1.27647467  | 2.259207871 |
| 6.666444354 | 5.208672306 | 1.855459948 |
| 1.391774376 | 1.456486563 | 1.693330173 |
| 2.496868235 | 2.399848341 | 1.571615211 |
| 5.138383846 | 4.555807712 | 4.505304964 |
| 3.073154899 | 3.946316849 | 1.321493344 |
| 3.525418007 | 1.867586348 | 2.885564367 |
| 3.845989725 | 2.981284713 | 3.473696609 |
| 1.655107586 | 2.225183576 | 2.60450584  |
| 3.356869539 | 2.750020212 | 1.948568706 |
| 3.255837459 | 2.588499414 | 2.321150616 |
| 2.354447082 | 1.304912452 | 1.99288174  |
| 1.430114383 | 5.095788871 | 3.009520932 |
| 1.082272804 | 4.467128955 | 4.583478539 |
| 2.261355612 | 2.168803641 | 1.874755939 |
| 1.531654396 | 2.405164997 | 2.480771149 |
| 3.949288349 | 3.352260106 | 1.299037613 |
| 2.967818295 | 1.229028584 | 2.170780143 |
| 2.770285642 | 1.581321699 | 3.032324597 |

|             |             |             |
|-------------|-------------|-------------|
| 3.447701174 | 1.234647655 | 1.736126119 |
| 1.838021787 | 2.551903732 | 1.559033873 |
| 1.490765928 | 1.889764325 | 2.953372233 |
| 2.55107253  | 1.780565148 | 2.807969613 |
| 2.021257496 | 2.627828841 | 1.575756235 |
| 1.052772152 | 1.612310779 | 2.143131963 |
| 2.155195732 | 2.119802996 | 1.867655593 |
| 4.483103309 | 3.11904794  | 1.129590552 |
| 7.938649838 | 1.455519188 | 2.279876556 |
| 1.873954647 | 2.552085765 | 1.907803549 |
| 1.858463542 | 2.148658434 | 2.314380928 |
| 1.894770593 | 1.527873879 | 1.966598536 |
| 2.686148634 | 2.602164104 | 1.275660401 |
| 5.039120986 | 2.399024078 | 6.762045299 |
| 3.481063053 | 2.325636257 | 3.364796851 |
| 3.369611499 | 1.750347526 | 1.445990156 |
| 4.272965754 | 3.789908954 | 4.432379255 |
| 1.235204927 | 1.7486699   | 3.645686543 |
| 1.576985981 | 1.097517588 | 1.717442162 |
| 1.040189075 | 1.991367251 | 2.309631686 |
| 2.945149964 | 1.748492648 | 1.075546957 |
| 3.712084667 | 3.039302407 | 3.096460283 |
| 2.7368673   | 1.906895917 | 1.312748451 |
| 1.83628696  | 1.304182038 | 3.69139232  |
| 1.22894439  | 2.778462103 | 1.126013448 |
| 2.241799755 | 2.021661524 | 1.857522836 |
| 2.356897226 | 1.94288189  | 1.987674317 |
| 2.940151408 | 4.301779725 | 4.66506958  |
| 1.298216358 | 2.060850691 | 1.692306001 |
| 1.597649809 | 3.691325228 | 1.98106073  |
| 3.147926691 | 2.547131768 | 3.284634019 |
| 4.256524065 | 5.64035123  | 2.977862968 |
| 8.10879322  | 3.329113466 | 1.107803947 |
| 2.7906095   | 2.239281128 | 1.993925687 |
| 4.393978626 | 2.643007363 | 4.608149559 |
| 3.977440263 | 3.002040013 | 4.962677102 |
| 6.350908538 | 1.727032729 | 2.379715636 |
| 1.938520105 | 1.317083158 | 1.246042799 |
| 1.206953753 | 4.467578786 | 1.634031329 |
| 5.113751839 | 4.572498181 | 2.771849553 |
| 3.736127179 | 1.180125536 | 2.506725243 |
| 3.941309909 | 4.442018935 | 1.925749135 |
| 2.262896843 | 1.26078559  | 1.461420643 |
| 1.235499005 | 1.155419331 | 1.688785622 |
| 1.158435307 | 2.893653564 | 3.834534886 |
| 4.039144909 | 3.20248239  | 4.67031823  |

|             |             |             |
|-------------|-------------|-------------|
| 1.970880556 | 1.219994019 | 3.144577053 |
| 1.054234955 | 3.831771977 | 3.158418737 |
| 2.647909898 | 3.360413814 | 1.988533997 |
| 2.290124227 | 2.961122621 | 2.596905025 |
| 5.132559383 | 1.337269649 | 4.699424836 |
| 1.762743942 | 3.326032818 | 1.015558214 |
| 2.551414961 | 1.239400177 | 1.401638499 |
| 2.240268003 | 1.462723097 | 1.875546483 |
| 1.153259921 | 1.542939222 | 1.165613089 |
| 1.440171014 | 4.001074105 | 2.196361758 |
| 1.393142998 | 5.655208514 | 3.364974547 |
| 1.342115617 | 2.176681787 | 4.125063532 |
| 2.892935256 | 1.132809753 | 2.006059147 |
| 3.490575499 | 2.504431397 | 2.908402781 |
| 3.903388111 | 1.22441576  | 2.891500256 |
| 1.7532493   | 2.099844232 | 2.784225671 |
| 3.156354901 | 1.322792795 | 4.323342251 |
| 1.9584201   | 1.536895981 | 1.706253348 |
| 1.194031881 | 2.96804739  | 1.4018981   |
| 1.350909572 | 3.637088939 | 3.481942638 |
| 1.73947146  | 2.355110577 | 2.253489835 |
| 1.845461689 | 2.867715087 | 4.173075829 |
| 2.554119506 | 2.805295132 | 2.289360789 |
| 3.296741117 | 2.712450286 | 1.329372858 |
| 1.691665034 | 3.474248921 | 1.534611911 |
| 1.729843209 | 1.106972995 | 2.732533453 |
| 3.027747637 | 1.056515458 | 2.593159447 |
| 2.51156481  | 4.098044526 | 3.807593524 |
| 2.28572867  | 1.357997232 | 0.96291867  |
| 1.010873398 | 2.806101076 | 1.200344252 |
| 1.897280967 | 2.450243572 | 1.593294911 |
| 2.362607268 | 1.96680173  | 2.018365622 |
| 3.132249494 | 0.970918365 | 1.605960537 |
| 2.509016084 | 4.131122222 | 1.204434375 |
| 1.484712807 | 4.393779916 | 2.068210057 |
| 1.066581704 | 1.427720874 | 1.461012388 |
| 3.476004648 | 3.031093626 | 2.489784466 |
| 2.584562966 | 3.48128897  | 1.542030286 |
| 2.56614826  | 6.946013713 | 4.914726001 |
| 1.247544031 | 2.274734948 | 3.035497009 |
| 1.391191861 | 4.355035375 | 3.586796984 |
| 1.103595794 | 1.370042688 | 1.542148749 |
| 2.482093964 | 3.200839143 | 2.0031249   |
| 1.078580234 | 3.040071378 | 2.116008692 |
| 2.029245123 | 1.802017672 | 3.69022764  |
| 1.5126547   | 1.20499687  | 3.409981317 |

|             |             |             |
|-------------|-------------|-------------|
| 3.05783209  | 2.947563011 | 2.031289339 |
| 2.298974155 | 2.359538986 | 2.19454426  |
| 2.175965438 | 1.139859886 | 2.841946415 |
| 4.621997262 | 2.119016741 | 1.362440654 |
| 1.056173317 | 1.404369376 | 1.470207285 |
| 4.400054637 | 1.013581324 | 3.650181685 |
| 1.449972404 | 2.88182322  | 2.649709976 |
| 1.025462728 | 1.45290496  | 1.119312677 |
| 1.71615132  | 1.725529276 | 2.513798044 |
| 3.131849524 | 1.473672293 | 3.484250462 |
| 2.067492039 | 1.567963416 | 2.003708407 |
| 1.261383504 | 1.723501631 | 1.433913083 |
| 1.030673691 | 1.483020905 | 4.527864352 |
| 2.877480226 | 1.810122569 | 2.768455806 |
| 2.748108164 | 2.80797462  | 2.579628336 |
| 2.045895166 | 1.529499302 | 1.962203361 |
| 1.864104099 | 1.147478261 | 3.154962797 |
| 1.407966606 | 1.19879425  | 1.738639487 |
| 1.378097198 | 1.218665232 | 2.061969851 |
| 3.539755539 | 0.985622217 | 3.562835631 |
| 6.352154626 | 2.015196884 | 2.938386671 |
| 1.807310074 | 1.238873101 | 1.324146212 |
| 1.088842294 | 2.828957601 | 1.747914669 |
| 2.387064239 | 2.496077806 | 1.247504846 |
| 1.265940604 | 1.550815292 | 2.48404772  |
| 2.371280418 | 3.362079318 | 1.532575506 |
| 3.178121819 | 1.696006458 | 2.011703731 |
| 2.516679848 | 1.426847687 | 1.841156234 |
| 4.07332999  | 4.377200852 | 1.474008332 |
| 4.388533382 | 1.988568918 | 2.602264422 |
| 2.472577299 | 1.021152673 | 2.198367691 |
| 1.252930933 | 1.006926892 | 1.258028537 |
| 3.556209954 | 1.400906923 | 1.284175363 |
| 1.069608757 | 3.34295621  | 4.137638721 |
| 3.167280179 | 1.03542695  | 1.348936641 |
| 1.413690627 | 1.448469757 | 1.090045133 |
| 1.650290533 | 1.75426713  | 1.097769905 |
| 2.850710705 | 2.098741216 | 1.028931158 |
| 5.696676092 | 2.626889271 | 0.978800772 |
| 1.141727088 | 1.387006522 | 1.596503098 |
| 2.441917286 | 1.750276629 | 2.552444215 |
| 3.250004758 | 1.046744127 | 3.026560075 |
| 2.821654322 | 1.182718663 | 2.071761305 |
| 0.890410124 | 3.194869437 | 3.51906634  |
| 2.342331304 | 2.527847711 | 1.821837571 |
| 1.646304793 | 3.130840762 | 3.052186017 |

|             |             |             |
|-------------|-------------|-------------|
| 2.923634298 | 3.192271873 | 1.679762717 |
| 1.681949685 | 0.915558225 | 2.763189823 |
| 1.430451097 | 2.495166374 | 1.167328741 |
| 1.266323518 | 1.562087567 | 2.410982572 |
| 2.370604929 | 1.991882628 | 1.99866897  |
| 1.550972153 | 1.713355073 | 1.396342388 |
| 2.040353976 | 1.826435621 | 2.087516708 |
| 1.083302946 | 2.499817845 | 1.984552822 |
| 3.03159112  | 2.145007422 | 0.972556857 |
| 1.727136107 | 0.946971603 | 1.491389917 |
| 3.565010003 | 3.457540272 | 4.613723829 |
| 2.255441219 | 2.063737841 | 0.96573652  |
| 2.20776187  | 1.630958052 | 1.796932812 |
| 3.268693996 | 2.777720422 | 2.591119611 |
| 2.068879827 | 1.261952679 | 0.993996971 |
| 8.329529641 | 0.996089995 | 7.050405458 |
| 7.468778104 | 7.973750747 | 6.539344935 |
| 0.966523628 | 3.214411205 | 2.709799251 |
| 1.311310253 | 3.538595028 | 4.073178662 |
| 3.545719667 | 1.244173994 | 1.280284235 |
| 4.363331578 | 4.050905828 | 0.981896235 |
| 1.17288998  | 1.152274406 | 1.903373961 |
| 3.594391271 | 2.815030064 | 1.030491169 |
| 1.99427525  | 2.567119648 | 1.141006441 |
| 2.534334685 | 3.629242406 | 2.603607113 |
| 1.060648667 | 2.4977105   | 3.028944653 |
| 2.112134357 | 1.485525528 | 1.036964218 |
| 3.536309022 | 4.552628376 | 4.064589038 |
| 4.991950747 | 4.577869459 | 6.288809675 |
| 2.751524842 | 2.436533192 | 2.904745533 |
| 1.023739354 | 2.396605673 | 3.783667101 |
| 4.169290411 | 0.875780656 | 2.068250243 |
| 1.381368657 | 1.161981019 | 1.865706776 |
| 3.079724486 | 1.158198829 | 1.974873738 |
| 2.020115323 | 3.304534407 | 3.088908435 |
| 2.610891762 | 3.02675951  | 1.721411013 |
| 2.89417851  | 3.511006786 | 1.539451415 |
| 0.955802011 | 1.140939239 | 1.477348816 |
| 3.059612084 | 2.343790376 | 1.003123713 |
| 2.370945274 | 1.014328843 | 0.951131794 |
| 1.591919897 | 1.127314717 | 2.105711223 |
| 2.645602371 | 2.381618674 | 1.011233026 |
| 5.023868326 | 2.617051709 | 2.37422563  |
| 3.078235961 | 2.320147667 | 2.312458764 |
| 2.594273227 | 0.956207024 | 1.888065953 |
| 7.361723427 | 8.075154453 | 1.311188257 |

|             |             |             |
|-------------|-------------|-------------|
| 1.664495321 | 1.668073934 | 1.814723875 |
| 1.722849462 | 1.01792774  | 2.31989231  |
| 1.409122378 | 4.111578777 | 2.824250316 |
| 1.467405156 | 2.493950734 | 2.150151124 |
| 1.63599593  | 1.384284307 | 2.684211905 |
| 6.233825337 | 2.567027174 | 3.016465716 |
| 1.395756135 | 1.12934179  | 1.758407439 |
| 3.287778607 | 0.954829863 | 2.222218508 |
| 1.342322518 | 1.846551998 | 0.883980977 |
| 3.201266096 | 4.029038172 | 1.103953607 |
| 3.073076918 | 2.667365958 | 2.770376699 |
| 2.622365858 | 3.033916865 | 1.314999499 |
| 3.410057408 | 2.759148517 | 3.800268113 |
| 1.981931107 | 2.625017452 | 3.662019754 |
| 2.613286472 | 0.875492426 | 0.971519526 |
| 3.453065438 | 2.202274157 | 1.377124118 |
| 2.69082793  | 2.211173505 | 1.992592482 |
| 5.350777585 | 1.581904772 | 5.010802551 |
| 1.961815391 | 1.842328302 | 2.19976915  |
| 1.043331182 | 2.328106286 | 3.00539258  |
| 1.72074553  | 0.999360943 | 1.626406846 |
| 3.432007489 | 3.772544913 | 3.288655376 |
| 2.488003534 | 1.692470359 | 1.041939022 |
| 2.931102257 | 1.557126712 | 1.887596862 |
| 1.593684439 | 1.342280585 | 1.759719659 |
| 1.66665382  | 2.36950636  | 2.324726495 |
| 1.195210954 | 0.936971894 | 1.572784884 |
| 2.62392517  | 1.315745825 | 2.186690103 |
| 1.842094773 | 4.024020246 | 1.060489609 |
| 2.445215705 | 1.673318242 | 2.271321646 |
| 2.759269836 | 1.034972222 | 2.682430841 |
| 1.758207938 | 1.894891489 | 1.485957238 |
| 3.023565774 | 3.467337062 | 1.233952554 |
| 1.633079716 | 2.732003508 | 2.30854048  |
| 3.203021714 | 3.099825587 | 3.451630836 |
| 6.924010362 | 2.844245218 | 1.972174697 |
| 1.086974056 | 2.782627704 | 3.228308374 |
| 2.137460553 | 1.131917722 | 2.299866332 |
| 2.192285583 | 2.261175252 | 1.919400821 |
| 2.654632106 | 2.074168765 | 1.025766634 |
| 1.614615312 | 2.716334755 | 1.113779871 |
| 5.280659371 | 1.338396166 | 4.201210637 |
| 2.513758921 | 2.459208091 | 1.228132539 |
| 3.320809752 | 2.895727287 | 2.463659278 |
| 4.228050627 | 0.837129688 | 1.98504508  |
| 2.750912457 | 2.695599989 | 2.984941647 |



|             |             |             |
|-------------|-------------|-------------|
| 1.559061173 | 2.017840572 | 1.971251326 |
| 2.517224636 | 2.63039796  | 1.137608231 |
| 3.994672297 | 2.99184263  | 4.284742947 |
| 3.312226368 | 1.91459985  | 0.942328804 |
| 2.187327146 | 0.992167357 | 1.753934409 |
| 1.261060937 | 1.17614854  | 0.888139398 |
| 2.433440696 | 1.810201393 | 1.402121046 |
| 3.005344382 | 1.843609423 | 2.394184846 |
| 0.984484605 | 2.859811665 | 2.286506204 |
| 3.11632321  | 4.27774259  | 0.837210979 |
| 1.773878331 | 3.042567582 | 1.246049727 |
| 1.342365168 | 1.234452086 | 4.082762244 |
| 4.694743822 | 4.692955142 | 6.928798561 |
| 3.369227211 | 6.389997013 | 3.805139542 |
| 2.019290353 | 2.63810546  | 1.583304662 |
| 1.819278835 | 2.700084023 | 1.2822203   |
| 1.955562617 | 0.882542211 | 1.540268333 |
| 1.741166479 | 1.723969238 | 2.655011619 |
| 2.370917178 | 0.932479187 | 1.259503626 |
| 1.782213592 | 0.820842477 | 2.199278607 |
| 0.861632308 | 1.892131623 | 3.028700876 |
| 4.880193327 | 3.477858259 | 1.218818289 |
| 1.068051012 | 1.198879006 | 1.882533734 |
| 1.86865484  | 1.01702447  | 1.0674878   |
| 2.159303637 | 0.918665679 | 2.085490302 |
| 2.83307575  | 1.900933681 | 2.324477949 |
| 0.935909272 | 2.346522625 | 3.085581023 |
| 1.080987602 | 3.131810033 | 3.550927357 |
| 2.066049883 | 1.048393579 | 1.371595277 |
| 4.660565236 | 4.766686798 | 1.539663874 |
| 1.939934008 | 2.215824673 | 1.120212413 |
| 2.492728946 | 1.23881375  | 0.949933008 |
| 3.694401557 | 0.868931155 | 2.194724187 |
| 1.755467671 | 1.751397275 | 1.41091649  |
| 2.89857373  | 1.788720663 | 1.22001172  |
| 1.842534152 | 1.70358241  | 1.388012521 |
| 1.708811026 | 2.138504343 | 1.301753607 |
| 0.863521533 | 2.828813118 | 3.664858165 |
| 4.042998477 | 1.236265083 | 3.061963846 |
| 2.402906092 | 0.900819281 | 2.306600557 |
| 2.643897644 | 3.339185639 | 1.317090137 |
| 2.593087263 | 1.997541833 | 2.106774458 |
| 5.155995059 | 3.632271957 | 4.934765451 |
| 5.762997167 | 1.793627406 | 1.793909467 |
| 4.71724923  | 2.243809552 | 1.887992426 |
| 4.103663333 | 5.208980177 | 0.811481565 |

|             |             |             |
|-------------|-------------|-------------|
| 1.51929235  | 1.475011692 | 1.245291948 |
| 1.631106977 | 1.140965478 | 0.803022921 |
| 1.245565474 | 0.762197925 | 2.741883458 |
| 1.341693224 | 2.295339311 | 1.257625821 |
| 1.935537939 | 1.380237233 | 1.269449115 |
| 2.441149056 | 1.03259373  | 4.126258726 |
| 4.52947826  | 0.714500104 | 4.584562408 |
| 2.701737286 | 1.780063788 | 2.565105583 |
| 4.943758345 | 3.871330413 | 2.843063147 |
| 3.886020418 | 3.269772676 | 2.985740117 |
| 0.869094525 | 1.23402775  | 1.271213606 |
| 1.017719561 | 2.62059188  | 3.168124517 |
| 2.474296291 | 1.971928278 | 1.151698812 |
| 3.683932145 | 1.319089577 | 2.390371055 |
| 3.902441223 | 2.849917794 | 4.497435992 |
| 2.830374814 | 1.380833802 | 1.707369977 |
| 1.295062713 | 2.474013806 | 1.579565614 |
| 1.876227439 | 3.324890691 | 2.442843173 |
| 1.068960054 | 2.880707446 | 1.652250006 |
| 2.224860039 | 5.66548965  | 1.024943996 |
| 2.583986249 | 1.730472165 | 2.508988779 |
| 2.245356827 | 1.13888033  | 1.771939604 |
| 1.873740633 | 3.859099361 | 5.192460406 |
| 1.979924959 | 0.829513196 | 2.137425081 |
| 2.058638188 | 1.765213215 | 4.407723418 |
| 2.418947786 | 0.857367201 | 1.188251218 |
| 0.851223241 | 5.055611999 | 4.898299421 |
| 0.742713141 | 4.365775485 | 3.995106202 |
| 2.626785445 | 1.16895348  | 1.524585511 |
| 2.077923855 | 1.074866386 | 1.271030732 |
| 2.550739457 | 1.068311028 | 1.888740563 |
| 2.141038329 | 2.192683441 | 1.962490958 |
| 2.826200124 | 1.505066593 | 1.341368955 |
| 1.199944031 | 1.316840308 | 1.467038042 |
| 1.316694849 | 2.72537518  | 1.701339136 |
| 2.083108172 | 1.19439487  | 1.23231411  |
| 1.320247396 | 0.854803606 | 1.621792885 |
| 4.527753263 | 3.542470898 | 0.957115954 |
| 0.871455347 | 1.283419846 | 1.855914565 |
| 2.633028748 | 0.82530505  | 1.638907747 |
| 3.015037432 | 3.251391135 | 2.737809504 |
| 4.204605653 | 3.700736627 | 4.230096613 |
| 3.318538452 | 3.243834798 | 2.477024814 |
| 2.237194214 | 1.264173005 | 2.908811066 |
| 2.215198914 | 1.90677026  | 1.844270174 |
| 0.885663862 | 4.465683712 | 1.895863302 |

|             |             |             |
|-------------|-------------|-------------|
| 0.843532186 | 3.052679474 | 3.282279983 |
| 2.123282189 | 1.068559077 | 1.944258659 |
| 3.295098928 | 5.808445638 | 0.820755106 |
| 0.720757984 | 1.486161637 | 0.894787641 |
| 2.904790336 | 2.261436693 | 1.021724274 |
| 5.530287063 | 4.031941659 | 0.772918984 |
| 1.602964397 | 0.762745451 | 0.850353654 |
| 0.708977785 | 4.807638564 | 4.087978964 |
| 2.176050297 | 1.399492832 | 2.677757971 |
| 2.243455496 | 2.304313411 | 1.35825254  |
| 0.949270764 | 0.751876796 | 1.012935051 |
| 5.477167588 | 1.093908698 | 3.885756701 |
| 2.455211997 | 1.385867598 | 1.843783535 |
| 1.015992496 | 1.914844186 | 1.348721059 |
| 1.901979542 | 0.962029869 | 2.848920411 |
| 3.189828003 | 1.685430439 | 1.412748895 |
| 1.833474043 | 1.793303774 | 2.785371945 |
| 1.626874491 | 2.762764428 | 0.942811401 |
| 2.393779857 | 1.639494991 | 1.312817801 |
| 2.146508555 | 0.641192972 | 3.112630615 |
| 0.953590886 | 1.260145529 | 1.312499318 |
| 2.207459794 | 2.615516554 | 1.061465749 |
| 3.164658402 | 2.383310486 | 1.405192995 |
| 4.183350511 | 0.737956091 | 2.740579404 |
| 0.750498758 | 4.276175463 | 4.238388006 |
| 2.776655343 | 1.133649555 | 0.995161015 |
| 1.554425756 | 1.179988779 | 1.794673756 |
| 2.342875983 | 1.580588839 | 0.932658197 |
| 1.612789677 | 2.841130522 | 2.655612466 |
| 1.996435351 | 1.437539705 | 3.00928066  |
| 6.254967045 | 4.755689423 | 5.219641791 |
| 2.707335857 | 2.197602254 | 1.883890652 |
| 1.0434433   | 2.000807278 | 2.428498147 |
| 2.80932077  | 1.237432674 | 2.237864919 |
| 3.425046409 | 0.859513183 | 1.632020213 |
| 2.778069793 | 1.697656392 | 0.68244683  |
| 2.644546994 | 2.130991244 | 0.665188314 |
| 2.203613776 | 1.10070528  | 3.302567438 |
| 1.860781965 | 1.381757629 | 1.757718442 |
| 2.943556872 | 2.52346679  | 1.789335386 |
| 1.401247591 | 1.800329976 | 1.354786058 |
| 1.300490416 | 5.299786145 | 5.001997795 |
| 3.550742521 | 2.053751778 | 1.781747669 |
| 6.767885285 | 3.504671865 | 2.350127267 |
| 2.339258495 | 1.547250191 | 1.916444815 |
| 5.899505939 | 1.190095412 | 1.409742544 |

|             |             |             |
|-------------|-------------|-------------|
| 2.252164608 | 1.133677319 | 1.595598701 |
| 1.27573492  | 1.803019236 | 1.44428024  |
| 2.558614258 | 1.524925219 | 1.715068581 |
| 2.414753018 | 2.105074176 | 1.657608042 |
| 3.52431309  | 1.043611896 | 3.694454575 |
| 4.180210772 | 2.67384584  | 3.293191541 |
| 0.873910152 | 1.410840855 | 2.307105765 |
| 3.022251762 | 3.429977293 | 1.699573561 |
| 1.408994972 | 2.689506019 | 1.148806681 |
| 2.308544613 | 1.454424047 | 0.835498414 |
| 2.200316451 | 1.655618051 | 2.979469488 |
| 1.758022126 | 1.372248872 | 2.123339241 |
| 1.989220868 | 0.823838025 | 3.160387438 |
| 3.954351155 | 2.798972816 | 3.67441918  |
| 0.854549256 | 1.671212282 | 1.650823486 |
| 3.041521212 | 3.656267939 | 3.353003776 |
| 3.37726656  | 1.571268274 | 1.383517406 |
| 2.491854027 | 2.164768933 | 0.96991119  |
| 2.618092688 | 3.06853818  | 4.670101222 |
| 2.988343316 | 2.300183239 | 1.384368393 |
| 1.747451119 | 0.994167637 | 0.976720474 |
| 3.508829483 | 3.586381861 | 0.86258606  |
| 2.419243137 | 1.582334236 | 1.808618932 |
| 2.498794136 | 2.968071979 | 2.770126458 |
| 2.760329627 | 0.637247732 | 2.39556393  |
| 3.96794566  | 6.654232087 | 0.870217301 |
| 4.656698522 | 2.231692917 | 1.786766658 |
| 2.051099176 | 2.903517742 | 1.446370637 |
| 1.027279721 | 1.480213429 | 1.44368427  |
| 3.295564963 | 0.803702838 | 1.054770595 |
| 0.7599955   | 3.819411554 | 2.230852809 |
| 4.532576115 | 5.494941812 | 6.524908775 |
| 1.677129698 | 0.668147924 | 1.670818487 |
| 0.681082003 | 1.409731093 | 3.651406348 |
| 3.231975127 | 2.958463573 | 3.084193388 |
| 1.776277134 | 3.124130693 | 1.14766369  |
| 6.401152583 | 4.716618053 | 5.416437498 |
| 2.149064329 | 2.366789928 | 3.540628208 |
| 7.412395436 | 1.582449582 | 4.559474523 |
| 2.361230996 | 0.610131167 | 2.188831994 |
| 0.71645364  | 1.774885139 | 1.164451861 |
| 2.506972272 | 0.949034824 | 3.601938503 |
| 1.368148024 | 1.139587057 | 1.603092401 |
| 3.507999496 | 0.939738558 | 4.275206693 |
| 2.221599056 | 0.685688235 | 2.739080134 |
| 1.069012044 | 1.475876433 | 1.802004908 |

|             |             |             |
|-------------|-------------|-------------|
| 3.238638244 | 1.237862001 | 2.901142212 |
| 4.042646863 | 1.367430622 | 3.014785914 |
| 1.693599953 | 1.712353575 | 1.674555491 |
| 2.767660184 | 2.592803476 | 2.755306966 |
| 1.677444566 | 1.172648999 | 0.672585501 |
| 2.011353287 | 1.421664906 | 1.963651676 |
| 1.289581011 | 1.10277844  | 1.163321698 |
| 2.550366452 | 3.129437828 | 2.784431496 |
| 2.738910897 | 3.254305984 | 2.881855003 |
| 4.515534104 | 3.457054669 | 3.403405778 |
| 1.607248284 | 0.986160831 | 0.62051151  |
| 5.219455454 | 3.404396421 | 0.745663533 |
| 3.283559575 | 1.980480615 | 5.429590554 |
| 1.969342674 | 1.922024229 | 1.151528938 |
| 1.988147215 | 1.217473496 | 1.913149325 |
| 2.494158501 | 0.677646302 | 1.493778239 |
| 1.824710007 | 2.105218521 | 1.846229939 |
| 2.324626323 | 0.747312362 | 1.757500901 |
| 1.397131749 | 0.957424251 | 0.941171641 |
| 2.939880285 | 3.630429039 | 3.340826278 |
| 1.371144764 | 1.551193022 | 0.768975756 |
| 5.324262103 | 3.339250672 | 6.187784631 |
| 1.09958335  | 0.795360664 | 1.285887223 |
| 1.452982904 | 1.370705351 | 1.506239231 |
| 1.305745246 | 3.649636812 | 6.078080966 |
| 3.636353929 | 0.578878204 | 2.65113128  |
| 2.495994365 | 2.661577514 | 1.658416862 |
| 1.632606515 | 1.50067457  | 0.801900586 |
| 0.904647137 | 0.82844292  | 0.914754491 |
| 0.644150471 | 1.746484061 | 1.912781142 |
| 2.248377785 | 1.895905712 | 1.978139504 |
| 2.355596174 | 2.37685077  | 3.348962096 |
| 1.908601518 | 2.818788108 | 2.04676481  |
| 1.981381631 | 1.015585055 | 0.765907428 |
| 0.714285635 | 1.462145487 | 1.748832193 |
| 1.983006038 | 0.65006123  | 2.94079771  |
| 6.505833156 | 3.296903645 | 3.831194943 |
| 1.542586312 | 0.790878359 | 0.940291437 |
| 0.932007465 | 1.73174813  | 1.476732034 |
| 2.739481352 | 4.109544587 | 3.530614216 |
| 1.543225483 | 1.670654316 | 0.605280881 |
| 1.994344313 | 0.826043244 | 1.282279743 |
| 1.416928046 | 1.247980722 | 1.057995383 |
| 1.528915237 | 0.620067867 | 2.710178925 |
| 2.691093937 | 2.761265339 | 1.740430249 |
| 1.61698346  | 2.532387318 | 2.527270673 |

|             |             |             |
|-------------|-------------|-------------|
| 2.262341275 | 1.166576519 | 1.810245519 |
| 1.09248568  | 0.828685025 | 1.834947156 |
| 1.963765621 | 0.851866477 | 1.339121353 |
| 1.07395709  | 1.117847239 | 0.868468338 |
| 1.235591559 | 1.172039424 | 0.945686423 |
| 0.840970011 | 2.257844063 | 5.236239876 |
| 1.200744064 | 1.752314056 | 0.988735831 |
| 2.3746103   | 2.436084905 | 2.720033633 |
| 1.455696176 | 1.763859938 | 0.896063343 |
| 2.457811027 | 1.109063071 | 1.680443428 |
| 2.335296559 | 2.110286721 | 1.272365643 |
| 4.055217459 | 2.311997796 | 2.748936197 |
| 0.774942109 | 4.69160853  | 1.214169892 |
| 1.280439437 | 0.512132033 | 1.540875429 |
| 1.482451173 | 0.900565293 | 1.592453221 |
| 0.783029438 | 2.734363321 | 2.286336862 |
| 0.670476192 | 2.434276631 | 0.969493037 |
| 3.035254319 | 3.514238956 | 2.39195495  |
| 1.788665978 | 1.299510264 | 1.434485921 |
| 2.917874629 | 2.363911805 | 3.351699808 |
| 0.656388729 | 3.904524792 | 2.41041838  |
| 1.150414885 | 1.039516852 | 1.732553433 |
| 1.330201217 | 0.914983789 | 0.770389027 |
| 2.846582741 | 4.150116741 | 4.313065469 |
| 1.024180235 | 1.341878234 | 3.934882155 |
| 1.861096686 | 1.742196612 | 0.773793665 |
| 1.473721671 | 1.190010474 | 3.782984817 |
| 3.446669129 | 0.840818627 | 0.8206551   |
| 4.818900114 | 3.158617855 | 1.063123566 |
| 1.81235342  | 1.018367278 | 0.766169388 |
| 1.065803105 | 8.667321176 | 8.662903694 |
| 2.270313485 | 0.580235161 | 2.082157812 |
| 1.910860751 | 3.456459843 | 0.552908426 |
| 1.109670003 | 1.582947934 | 1.040860714 |
| 2.705482112 | 2.61994156  | 3.27622274  |
| 2.227124742 | 2.11309146  | 2.116945008 |
| 2.290913841 | 1.264100623 | 1.677852466 |
| 3.493554088 | 2.840510694 | 4.30581608  |
| 5.680726214 | 2.722100014 | 1.232092794 |
| 2.073565489 | 1.460904674 | 1.703757337 |
| 1.806900367 | 1.120582477 | 0.810016266 |
| 0.761465307 | 1.480805726 | 1.339658018 |
| 4.036656174 | 1.839190913 | 0.759808788 |
| 1.243162971 | 1.554966319 | 0.526779294 |
| 3.889101506 | 0.728773234 | 2.337360914 |
| 1.617944483 | 0.987370211 | 2.540830191 |

|             |             |             |
|-------------|-------------|-------------|
| 0.826745859 | 2.14825729  | 1.402468536 |
| 1.069050241 | 0.672426017 | 0.782641063 |
| 2.724931808 | 0.994051896 | 1.625454695 |
| 1.113945989 | 1.14133946  | 0.94656006  |
| 1.054686148 | 1.700019901 | 1.638215543 |
| 3.650816031 | 2.929148624 | 1.279307803 |
| 1.760052096 | 2.308381448 | 2.278768251 |
| 3.99872438  | 2.723032665 | 3.92799112  |
| 2.694571269 | 1.459957798 | 0.674785957 |
| 2.350063682 | 2.229741002 | 2.066878707 |
| 3.118891019 | 4.036882557 | 1.824857244 |
| 4.89921156  | 0.711392613 | 3.993641135 |
| 1.446846138 | 0.803183297 | 2.070771635 |
| 2.11889731  | 0.91795443  | 1.180403224 |
| 1.348507162 | 3.195897376 | 1.778087203 |
| 2.50631592  | 0.908873029 | 5.429070277 |
| 1.09386546  | 3.479505029 | 3.670015443 |
| 1.095020127 | 1.870389911 | 1.182633073 |
| 2.020517665 | 1.62876301  | 1.730947482 |
| 1.717207504 | 2.821880229 | 1.817412464 |
| 3.270789541 | 3.906101988 | 3.72628666  |
| 1.19847874  | 1.030999467 | 2.066507119 |
| 1.813478292 | 0.644594755 | 1.612556532 |
| 2.052598304 | 0.651010567 | 0.657421917 |
| 1.611080617 | 1.411902707 | 0.617155797 |
| 0.508926177 | 1.325399463 | 2.41548678  |
| 3.41080805  | 2.780655721 | 4.540360707 |
| 1.697144607 | 1.676319263 | 2.182314769 |
| 4.042346955 | 4.414971472 | 3.579854807 |
| 2.635555374 | 2.382971129 | 2.079403568 |
| 1.116137532 | 1.748373445 | 1.358485901 |
| 2.122500417 | 0.971616773 | 2.845177254 |
| 2.670545643 | 2.544374551 | 1.628671233 |
| 0.425407684 | 1.346657487 | 3.28682554  |
| 5.466623505 | 1.152393259 | 3.327192086 |
| 2.178597141 | 3.048914803 | 2.903330154 |
| 2.993452722 | 4.183454938 | 2.931174378 |
| 4.57920931  | 4.138896847 | 2.89363749  |
| 1.582532147 | 1.607632377 | 2.291404528 |
| 1.402775762 | 1.518171389 | 2.057138231 |
| 2.803445414 | 0.584869895 | 1.274799927 |
| 1.415252366 | 2.657888721 | 2.991219598 |
| 1.723189771 | 1.753876177 | 2.282522178 |
| 2.338305822 | 4.784938001 | 3.303990421 |
| 4.541812524 | 2.461819102 | 1.286873192 |
| 0.943018978 | 0.829887955 | 0.888156012 |

|             |             |             |
|-------------|-------------|-------------|
| 1.43288639  | 0.998214464 | 1.642725389 |
| 1.88294103  | 0.873025393 | 1.700877423 |
| 1.948232356 | 1.301370625 | 1.400160488 |
| 1.217777729 | 1.581680791 | 1.675733049 |
| 2.038193671 | 1.607721879 | 1.293493227 |
| 1.395898909 | 2.141101541 | 1.076951789 |
| 0.64214845  | 4.324231826 | 6.368130995 |
| 2.66970801  | 2.749613946 | 3.562790182 |
| 1.091166103 | 0.970846228 | 1.737763977 |
| 1.92582116  | 0.468051623 | 2.982877404 |
| 1.48467698  | 0.735480711 | 1.741192551 |
| 2.263216077 | 1.368331429 | 0.611083153 |
| 3.435254044 | 3.473791086 | 2.615920831 |
| 1.918959746 | 2.968821181 | 2.823547139 |
| 1.177372624 | 0.604702634 | 1.764198036 |
| 3.037499302 | 2.001815646 | 2.783848977 |
| 4.740872136 | 0.604980027 | 4.330039878 |
| 2.148069794 | 1.448562934 | 0.815569584 |
| 3.838186672 | 1.584196684 | 1.63404344  |
| 1.529734064 | 0.711761014 | 2.76741782  |
| 1.528803596 | 0.7234436   | 1.27259167  |
| 2.254149382 | 5.386694237 | 4.78529911  |
| 2.054713377 | 1.128156511 | 0.833718718 |
| 2.038788014 | 0.738365882 | 1.677455111 |
| 0.506895723 | 1.752359484 | 1.221205858 |
| 1.492109242 | 1.215788443 | 2.305492786 |
| 2.05436051  | 0.461858209 | 1.771540679 |
| 2.115169146 | 3.167164558 | 0.619243403 |
| 1.63812412  | 0.478151904 | 1.005199552 |
| 5.07801294  | 2.53902225  | 0.792813753 |
| 2.520816152 | 1.068135424 | 1.323048685 |
| 0.65431051  | 4.158397033 | 2.290048545 |
| 0.682596574 | 0.866213159 | 2.142218571 |
| 0.433633765 | 2.900596821 | 0.477869514 |
| 1.195013515 | 1.217675183 | 0.794217505 |
| 1.852115227 | 5.328901001 | 3.974027096 |
| 3.613437597 | 0.509623315 | 1.092960316 |
| 1.879125825 | 2.140300815 | 0.452335696 |
| 2.163449784 | 2.160601644 | 1.456770742 |
| 1.952704391 | 2.281279314 | 1.431014092 |
| 3.85356899  | 0.988277722 | 4.054074394 |
| 1.287637212 | 1.238811868 | 0.983230233 |
| 0.849771528 | 2.851696193 | 2.84361639  |
| 0.80906823  | 2.468031582 | 3.030873541 |
| 0.900300119 | 1.148883853 | 1.011687293 |
| 1.907101081 | 0.61160256  | 1.356529479 |



|             |             |             |
|-------------|-------------|-------------|
| 1.6628029   | 0.643554187 | 0.989365576 |
| 0.903721451 | 2.190086534 | 1.6851416   |
| 3.771238373 | 0.692473565 | 1.638256999 |
| 1.599593845 | 0.466166727 | 1.292693093 |
| 2.30128244  | 0.803543252 | 3.408624152 |
| 2.525927239 | 2.208557036 | 1.047130883 |
| 1.862945814 | 2.20940649  | 2.089779461 |
| 1.554897698 | 1.86619697  | 0.442366662 |
| 2.444826749 | 0.343770426 | 1.01382666  |
| 2.783316625 | 4.371574983 | 4.74933788  |
| 8.624976608 | 4.627122759 | 3.940812091 |
| 2.066151711 | 1.650308377 | 1.519785395 |
| 0.531724474 | 1.748887304 | 1.36529366  |
| 1.103393837 | 1.119735213 | 1.236036223 |
| 0.485883116 | 7.009905853 | 6.782307528 |
| 6.838054966 | 7.874353837 | 6.985145541 |
| 1.849365393 | 0.568294306 | 2.663284013 |
| 1.473707866 | 2.089411606 | 1.82277597  |
| 0.411959207 | 3.359374924 | 4.162014504 |
| 3.873384525 | 3.635486059 | 2.597307808 |
| 0.614427619 | 0.806616954 | 0.645817023 |
| 0.983515015 | 2.693050805 | 2.353616192 |
| 1.741366367 | 0.941705233 | 0.597787946 |
| 3.438098282 | 1.11429033  | 3.380971804 |
| 1.617025699 | 2.364898978 | 1.318836992 |
| 1.69529353  | 2.346472384 | 2.140145489 |
| 0.883151516 | 1.262914835 | 2.626591373 |
| 1.821304445 | 2.794028563 | 6.167025763 |
| 2.275483821 | 0.821991154 | 0.934335122 |
| 3.63453227  | 0.40801834  | 3.252498946 |
| 0.717167897 | 1.614292916 | 0.665945901 |
| 6.828189206 | 5.610917249 | 0.432515272 |
| 1.658788712 | 1.789632569 | 1.117086464 |
| 3.350090848 | 2.690370282 | 0.475597101 |
| 7.556747915 | 4.764858176 | 4.309689305 |
| 3.044104684 | 2.120311441 | 0.385596015 |
| 1.145672799 | 0.90718307  | 1.423152256 |
| 1.303863642 | 0.990395835 | 1.044727473 |
| 4.683090916 | 0.578398028 | 3.26310878  |
| 0.842634237 | 1.510050699 | 0.661017322 |
| 0.399917906 | 0.578993661 | 2.738139893 |
| 3.018249524 | 0.676710288 | 1.77505348  |
| 1.49071419  | 1.339315497 | 1.837139074 |
| 0.974786901 | 0.466223146 | 1.188057112 |
| 0.851513654 | 2.235182816 | 5.569258862 |
| 1.421987631 | 0.768788641 | 2.478239842 |

|             |             |             |
|-------------|-------------|-------------|
| 2.424765869 | 2.480306387 | 2.848133872 |
| 0.863592441 | 1.940183177 | 0.720589624 |
| 2.143794047 | 2.695147344 | 2.27130287  |
| 1.451746093 | 1.732116419 | 0.959275143 |
| 1.900551905 | 0.965917787 | 1.003646341 |
| 2.840613509 | 2.756454113 | 2.602428855 |
| 1.977797125 | 0.396976655 | 1.829292772 |
| 0.570118666 | 2.140459281 | 1.92769663  |
| 1.353926605 | 1.698498081 | 1.468885388 |
| 2.962140171 | 1.611154303 | 1.470883902 |
| 1.216883661 | 1.188578524 | 1.006491028 |
| 2.520584435 | 3.68906623  | 3.791886306 |
| 2.479529714 | 3.65553958  | 3.301545068 |
| 0.830254875 | 3.40053931  | 3.723581561 |
| 3.032517676 | 3.012855119 | 1.100355499 |
| 1.103233824 | 0.619028565 | 0.92663602  |
| 3.768623601 | 0.639852019 | 1.669183826 |
| 0.468794933 | 5.39908159  | 4.048820567 |
| 1.145725589 | 0.977237527 | 1.324144885 |
| 2.264258334 | 0.922376709 | 0.702214215 |
| 1.918362741 | 2.136131532 | 2.114659919 |
| 4.740308394 | 3.852049351 | 2.576073233 |
| 2.271020503 | 0.923139586 | 1.560748991 |
| 0.83361722  | 0.305275987 | 0.854553055 |
| 0.542971492 | 4.926277478 | 4.247004319 |
| 1.970334295 | 1.290939468 | 1.371963082 |
| 3.07342646  | 1.090915087 | 1.332172896 |
| 0.923679164 | 0.364108224 | 1.282418939 |
| 1.877268138 | 1.720331907 | 1.257884059 |
| 3.678649294 | 2.361972332 | 2.742005236 |
| 3.29000393  | 1.402417482 | 0.370665436 |
| 1.701390724 | 2.702083307 | 0.975000849 |
| 0.477302952 | 2.068105849 | 2.524842712 |
| 2.955046359 | 3.491421615 | 3.980358828 |
| 1.377918049 | 0.68011295  | 1.337094143 |
| 3.007564006 | 1.884931858 | 0.732233722 |
| 1.258176024 | 0.687389856 | 2.082959586 |
| 1.6974504   | 2.117151386 | 0.774767534 |
| 4.247932426 | 1.069497289 | 2.613468748 |
| 1.813566231 | 0.892435964 | 1.548402085 |
| 0.519240904 | 1.422997305 | 0.893725379 |
| 2.894567958 | 0.547820443 | 0.403948489 |
| 0.716234081 | 0.677995334 | 0.600271545 |
| 0.519202665 | 0.932617046 | 0.308228049 |
| 2.150682406 | 0.781229502 | 0.880380772 |
| 1.594110259 | 3.602656373 | 0.485069345 |

|             |             |             |
|-------------|-------------|-------------|
| 2.228786511 | 0.683437601 | 3.498086555 |
| 1.901661664 | 0.848898512 | 1.558400845 |
| 2.062365448 | 0.433246505 | 2.09436295  |
| 1.334703857 | 1.796403794 | 2.518800981 |
| 0.530085719 | 2.094017144 | 1.41237251  |
| 1.067007057 | 1.685584388 | 1.019997578 |
| 3.469782937 | 3.349830117 | 3.600074219 |
| 2.876052727 | 1.408864247 | 1.604894494 |
| 0.61512956  | 4.194583421 | 0.626665958 |
| 0.965525404 | 1.627107223 | 1.398964542 |
| 4.442504331 | 5.282314775 | 0.273097917 |
| 1.077666027 | 0.421038267 | 0.535289    |
| 2.720520113 | 0.367866359 | 2.409531644 |
| 3.111530013 | 3.043647954 | 2.914432364 |
| 2.46354048  | 1.697121112 | 0.541546316 |
| 0.654817777 | 1.992185808 | 0.459008277 |
| 0.608436793 | 0.92649441  | 2.436825225 |
| 3.56797543  | 2.134887901 | 3.823752571 |
| 2.023134602 | 2.107912879 | 0.461465856 |
| 3.063198964 | 3.222310561 | 1.326347101 |
| 1.181137308 | 1.957561263 | 0.680896565 |
| 1.642044242 | 1.343690249 | 0.852984917 |
| 0.727569729 | 0.571767043 | 0.487823422 |
| 1.956060708 | 1.769702474 | 1.236482325 |
| 1.218372216 | 1.359162833 | 0.97940771  |
| 0.319192478 | 1.128276353 | 1.856459438 |
| 3.10726522  | 2.822288313 | 1.927503454 |
| 1.588059491 | 1.866263409 | 1.882607646 |
| 4.084354274 | 0.203339209 | 1.793062608 |
| 1.704802203 | 0.69965639  | 2.168254656 |
| 1.932373555 | 1.949654955 | 3.249384594 |
| 1.450114528 | 1.998371641 | 1.384904762 |
| 0.73147502  | 0.818908798 | 0.578792953 |
| 4.998875812 | 4.785135814 | 0.427037174 |
| 2.504677752 | 3.852988845 | 2.026443307 |
| 1.419380213 | 1.837358761 | 0.622357852 |
| 0.868328432 | 2.075838445 | 1.189410228 |
| 1.655410884 | 1.971402854 | 2.978831459 |
| 1.055242964 | 0.479947729 | 1.075756994 |
| 0.374006766 | 3.393239168 | 3.714200847 |
| 0.659636111 | 0.385311354 | 1.175858932 |
| 0.698725754 | 1.558923054 | 1.196324731 |
| 1.788343513 | 0.859751744 | 0.697103397 |
| 3.026958334 | 2.681955738 | 0.212941828 |
| 1.677832354 | 0.850571944 | 2.034727049 |
| 5.170886714 | 4.562898547 | 3.818486719 |

|             |             |             |
|-------------|-------------|-------------|
| 1.087063998 | 0.319366779 | 1.038846953 |
| 0.659367333 | 1.315859905 | 0.994874563 |
| 0.571341366 | 1.529151542 | 2.433311192 |
| 2.032441856 | 0.834896408 | 4.738606069 |
| 2.368201564 | 0.594301344 | 0.646556211 |
| 1.792510571 | 1.864337453 | 0.778569639 |
| 0.446832978 | 6.969486161 | 8.114743132 |
| 2.492716917 | 0.675077736 | 1.883050904 |
| 4.741841586 | 2.123659885 | 1.506315351 |
| 1.140945002 | 1.647541644 | 1.295939674 |
| 3.095708707 | 1.74926429  | 0.825811987 |
| 0.315063982 | 5.116249178 | 5.678949833 |
| 1.679743635 | 0.872457646 | 1.696177058 |
| 1.2797835   | 1.907139059 | 1.508808359 |
| 0.691831912 | 2.124173465 | 2.408676576 |
| 0.409226377 | 3.77959225  | 2.121883482 |
| 3.88257805  | 0.499320832 | 2.10446447  |
| 1.083675227 | 1.620561091 | 1.017327219 |
| 1.593879802 | 2.086156499 | 2.892991496 |
| 3.248514781 | 0.917853595 | 2.601225095 |
| 1.874443307 | 1.584720773 | 2.613352107 |
| 1.751390451 | 0.750615944 | 1.450130709 |
| 1.28329419  | 0.753827173 | 0.713990144 |
| 7.785130274 | 0.20401164  | 2.440494845 |
| 0.598226104 | 0.142528479 | 0.599437815 |
| 2.695482687 | 3.009431957 | 1.852691466 |
| 1.875363648 | 1.943024679 | 1.908947471 |
| 2.122467907 | 1.959625751 | 0.432754492 |
| 0.655116272 | 0.489047282 | 0.918370266 |
| 0.359459939 | 3.040766696 | 3.453751691 |
| 2.915394662 | 1.338120524 | 2.31917887  |
| 4.524672683 | 5.001963635 | 3.298660832 |
| 2.473024063 | 1.512314934 | 0.726625147 |
| 2.131851673 | 1.589785269 | 2.420533182 |
| 1.526051801 | 0.5262225   | 1.223272116 |
| 1.695675584 | 3.57615155  | 2.525222028 |
| 0.301047569 | 2.704490137 | 2.88790505  |
| 0.520817367 | 0.62584289  | 0.937127366 |
| 1.228742653 | 1.519669796 | 1.51126187  |
| 0.709446009 | 0.370582338 | 1.570114061 |
| 1.014166973 | 1.302443525 | 1.625430968 |
| 1.319009864 | 1.746093431 | 0.542367213 |
| 0.424416965 | 1.569182436 | 0.728946284 |
| 2.166110145 | 2.814405514 | 0.328426417 |
| 0.998389097 | 0.522416801 | 0.362637337 |
| 0.16475786  | 0.631671565 | 0.744906108 |

|             |             |             |
|-------------|-------------|-------------|
| 1.127795396 | 1.075624541 | 2.083867168 |
| 1.192822893 | 3.513817845 | 3.539850869 |
| 2.868855228 | 1.704050756 | 0.584602199 |
| 0.164492377 | 1.865183452 | 0.225508593 |
| 2.922005576 | 3.104158324 | 0.316336092 |
| 0.848191854 | 3.269670643 | 3.377443138 |
| 2.940032963 | 1.702428072 | 0.224335636 |
| 1.761693196 | 1.453053578 | 1.136260549 |
| 0.456831708 | 0.262432735 | 2.095902228 |
| 0.618714001 | 0.57460099  | 1.593058746 |
| 4.104615883 | 0.752194942 | 3.83733403  |
| 1.07559528  | 0.148896195 | 0.398399924 |
| 0.827628566 | 0.597538037 | 1.4444709   |
| 1.480642051 | 0.468208175 | 0.972365303 |
| 4.137273992 | 1.738221926 | 2.118253542 |
| 2.79862983  | 2.512768041 | 2.879181039 |
| 1.535708979 | 0.490178842 | 1.562911437 |
| 0.840518966 | 1.295505283 | 1.40996195  |
| 1.716633152 | 0.464652517 | 1.189844698 |
| 3.074289099 | 2.588931618 | 0.772767513 |
| 1.963329668 | 0.25082636  | 2.752713852 |
| 0.798816329 | 0.605812828 | 0.799089714 |
| 0.449883842 | 4.670285123 | 5.018484191 |
| 1.153294016 | 2.191161654 | 1.928763316 |
| 2.306005668 | 0.521223105 | 1.750180438 |
| 1.255049039 | 1.233336042 | 0.783508024 |
| 1.311411584 | 1.680139434 | 1.183784713 |
| 2.624164457 | 2.089395199 | 2.333510723 |
| 2.087007778 | 0.333302779 | 0.901966595 |
| 1.87469559  | 2.031140279 | 1.428906284 |
| 2.6619267   | 1.196328723 | 0.461772976 |
| 0.88263701  | 0.826367508 | 0.071856923 |
| 1.772257921 | 1.688284346 | 2.542880289 |
| 0.536572581 | 2.159019785 | 2.090592565 |
| 1.666985585 | 3.586914338 | 4.304253781 |
| 1.981248594 | 1.789297774 | 0.80158819  |
| 1.929199447 | 0.894570607 | 1.306924389 |
| 2.45704697  | 4.534312273 | 0.174795509 |
| 3.876816077 | 0.112411423 | 4.893906105 |
| 2.049480266 | 2.547798159 | 0.448194061 |
| 0.214765046 | 1.111972133 | 4.048614882 |
| 0.815241623 | 1.501217114 | 2.421878317 |
| 0.534483317 | 1.573588687 | 2.827402893 |
| 0.121749088 | 1.252296965 | 1.591986204 |
| 1.529736796 | 1.706457456 | 0.270773888 |
| 2.256234553 | 0.225851566 | 0.225299188 |

|             |             |             |
|-------------|-------------|-------------|
| 7.120882694 | 4.805472127 | 4.871965285 |
| 1.525875371 | 2.259192928 | 0.874723746 |
| 4.271055098 | 5.137264324 | 3.685867261 |
| 4.443486082 | 0.279053937 | 1.237863289 |
| 1.989725017 | 1.072476262 | 2.866477074 |
| 6.329477065 | 0.108052091 | 2.984857952 |
| 1.564137485 | 0.114364307 | 0.989359723 |
| 3.73372183  | 1.890029956 | 2.189116501 |
| 0.241840811 | 1.835778709 | 2.939907235 |
| 1.352543978 | 1.66365678  | 2.661605284 |
| 1.344401661 | 3.04155326  | 0.920397475 |
| 2.148568078 | 2.581798871 | 2.168819744 |
| 5.345911981 | 4.677886294 | 2.560947526 |
| 1.342032067 | 1.315593613 | 1.810348956 |
| 0.029481871 | 5.831518062 | 4.302451481 |
| 1.50091958  | 1.547132863 | 0.494647228 |
| 1.634806423 | 2.770571391 | 0.396575325 |
| 1.596448053 | 1.496389829 | 1.08041166  |
| 0.741043524 | 1.353892931 | 0.897414174 |
| 1.591411364 | 0.664728975 | 0.705133205 |
| 3.072852737 | 2.414659803 | 2.308773916 |
| 2.153593367 | 0.472006963 | 3.700549734 |
| 2.126218398 | 1.539906555 | 1.413505947 |
| 2.198962897 | 0.555224408 | 1.773727504 |
| 1.696616485 | 0.928519219 | 1.756218646 |
| 1.015503288 | 0.820197141 | 2.29427737  |
| 1.134903701 | 1.617850544 | 0.510186842 |
| 5.367633505 | 0.973719215 | 4.257959037 |
| 1.38069222  | 1.776131951 | 2.140568631 |
| 1.90806959  | 1.121169799 | 1.546081319 |
| 0.900036104 | 0.671129213 | 3.274925612 |
| 1.161891179 | 2.170311338 | 2.337957101 |
| 2.103193128 | 0.50958386  | 0.549566919 |
| 1.931887311 | 0.385375666 | 1.890357308 |
| 1.380299787 | 2.192966176 | 3.076540818 |
| 2.068392052 | 1.56559926  | 1.743649688 |
| 0.303500688 | 2.084837944 | 2.294402801 |
| 1.411442199 | 1.779564326 | 0.368623029 |
| 2.110387017 | 1.151861702 | 1.296191837 |
| 0.139734713 | 2.401888047 | 3.002105314 |
| 0.4005712   | 2.727835152 | 2.586225031 |
| 4.343211941 | 2.593504437 | 1.7289289   |
| 0.335966785 | 1.332865785 | 1.333746615 |
| 2.209586254 | 2.209254886 | 1.538162593 |
| 0.577008257 | 1.83789334  | 3.327194336 |
| 2.056752723 | 1.106525757 | 0.649162161 |

|             |              |              |
|-------------|--------------|--------------|
| 3.858357386 | 4.099238631  | 3.95137599   |
| 0.195416817 | 1.086610741  | 0.150392492  |
| 1.985060863 | 3.073830806  | 2.007380683  |
| 5.691619905 | 0.493753211  | 3.089259147  |
| 0.362126998 | 0.796058087  | 2.051204981  |
| 2.927523653 | 3.021054956  | 3.291764647  |
| 0.827130323 | 1.075400779  | 0.602656631  |
| 2.955880261 | 1.640962084  | 3.405367435  |
| 0.345307813 | 0.036632037  | 0.838983848  |
| 0.314438552 | 1.667594693  | 0.167068686  |
| 0.426120122 | 0.291627387  | 0.907024502  |
| 1.163142641 | 0.171064213  | 1.115219965  |
| 0.826273298 | 1.075162747  | 1.341984128  |
| 0.128660507 | 4.128681868  | 4.399677188  |
| 0.464282366 | 1.463393581  | 1.630848945  |
| 1.161573987 | 0.829303669  | 0.20546749   |
| 1.148010447 | 0.94719868   | 0.483173684  |
| 0.728289004 | 0.547010267  | 0.190583191  |
| 3.145344282 | 1.724996289  | 1.430415295  |
| 1.024896647 | 3.314494812  | 0.062086963  |
| 1.679325553 | 0.577069867  | 0.447011204  |
| 1.372314654 | 1.245650608  | 0.479714427  |
| 3.473465676 | 3.565176638  | 2.837959546  |
| 1.376975555 | 1.412248588  | 0.624769295  |
| 3.198335323 | 3.030833592  | 2.649344815  |
| 3.021657656 | 0.720601145  | 1.614319063  |
| 0.315676065 | 5.326470463  | 4.542846087  |
| 2.595469525 | 3.173826869  | 0.729595283  |
| 4.078765506 | 6.915941917  | 7.800855509  |
| 1.065113873 | 2.577122519  | -0.051040913 |
| 1.374107985 | -0.001103545 | 0.922098276  |
| 2.671240778 | 2.788883805  | 2.308345416  |
| 0.950476811 | 0.820820455  | 2.062626034  |
| 0.244286851 | 3.507636853  | 2.542577769  |
| 0.550595749 | 0.510417311  | 0.875121651  |
| 3.98083832  | 2.437044632  | 0.502913661  |
| 0.167538273 | 2.563788855  | 0.860925026  |
| 3.245578685 | 1.707488961  | 2.524126363  |
| 1.113911025 | 1.738188051  | 1.150618705  |
| 1.251722161 | 0.30947609   | 2.364711913  |
| 2.294646118 | 1.709407588  | 0.481768896  |
| 3.622468215 | 2.871077231  | 6.769015477  |
| 1.519224006 | 0.505864828  | 1.887232719  |
| 8.067233677 | 0.181963046  | 3.428306129  |
| 3.550572297 | 0.404956572  | 0.233401398  |
| 2.472762759 | 2.238740855  | 1.447232004  |

|              |             |             |
|--------------|-------------|-------------|
| 1.885396483  | 0.270946963 | 1.41219613  |
| 0.748397452  | 0.081795662 | 0.89349783  |
| 0.377787213  | 1.303730316 | 0.476828139 |
| 1.890339556  | 2.530413122 | 1.226536188 |
| 1.348923911  | 0.474839135 | 0.342298193 |
| 2.393766113  | 0.754996865 | 1.777445508 |
| 0.363078184  | 4.328702637 | 4.820188168 |
| 0.850313054  | 0.946706722 | 1.346877901 |
| 1.326100528  | 1.117068401 | 2.135788267 |
| 3.632450747  | 1.380592024 | 3.614518128 |
| 1.656558411  | 0.965080669 | 1.802781898 |
| 2.094512563  | 1.68558018  | 1.192310204 |
| 5.738353108  | 5.787748604 | 4.974669432 |
| 0.239487868  | 1.085849272 | 3.037694818 |
| 0.911557561  | 0.217163327 | 0.132429794 |
| 1.983301925  | 0.555108847 | 0.786931621 |
| 0.687945372  | 1.63238443  | 0.843301649 |
| 0.700816725  | 2.217056874 | 3.052494099 |
| 2.716864175  | 2.643284302 | 0.165590009 |
| -0.053671326 | 0.761430339 | 1.679271089 |
| 0.804258443  | 2.12676478  | 0.742178075 |
| 0.175705856  | 2.373362304 | 4.102622311 |
| 5.82304073   | 3.591553856 | 1.749261524 |
| 3.127654142  | 3.234883875 | 0.039792812 |
| 0.951713415  | 0.441281612 | 0.818135263 |
| 4.736998119  | 0.368668232 | 5.32878796  |
| 2.157678889  | 0.168356843 | 1.137482947 |
| 0.786055804  | 0.707631724 | 0.203414121 |
| 1.927012055  | 0.894421264 | 0.609591542 |
| 1.346749121  | 0.791085634 | 1.331233328 |
| 2.44945945   | 0.522994255 | 0.623759174 |
| 2.395701508  | 0.910926459 | 0.663939683 |
| 2.735226549  | 2.037599084 | 0.754333689 |
| 1.120750964  | 0.213235518 | 0.8526239   |
| 5.234862797  | 1.966434863 | 2.015693476 |
| 2.670077534  | 0.421992357 | 0.272299286 |
| 0.924040983  | 0.970335796 | 0.531629249 |
| 2.436820758  | 0.750832699 | 0.033872108 |
| 1.563436838  | 1.286532287 | 2.06970644  |
| 5.582877119  | 0.126887035 | 2.951340128 |
| 2.2062237    | 0.666989283 | 1.324222574 |
| 1.19268971   | 0.296923533 | 0.81192355  |
| 2.715546954  | 5.073417027 | 1.105013867 |
| 5.67430331   | 0.526066836 | 0.224402211 |
| 0.105761695  | 4.558892286 | 5.203412642 |
| 0.810634996  | 0.497763544 | 0.934220793 |



|              |             |              |
|--------------|-------------|--------------|
| 0.913354685  | 0.960449027 | 1.14474573   |
| 2.47186234   | 0.570393467 | 3.379745583  |
| 0.426997657  | 0.604185234 | 0.115679417  |
| 3.305108182  | 0.971389462 | 2.878034085  |
| 2.21355628   | 3.201960589 | 0.112549934  |
| 2.348879525  | 0.086773405 | 0.823296096  |
| 2.22977995   | 1.588961114 | 2.094994373  |
| 0.63740832   | 3.384981472 | 2.957012067  |
| 1.621037105  | 0.718114363 | 3.109581834  |
| -0.026889567 | 0.852504599 | 0.600096087  |
| 2.990657245  | 0.778411028 | 3.066750881  |
| 1.171405974  | 0.831572598 | 0.492917836  |
| 0.148209524  | 2.644402012 | 3.80618199   |
| 1.170867654  | 0.846997723 | 0.023730087  |
| 0.981862397  | 0.463240151 | -0.073709766 |
| 4.991685989  | 0.204943409 | 0.431484099  |
| 0.554353711  | 0.374821894 | 1.154294634  |
| 0.065912496  | 1.345851439 | 0.400513286  |
| 1.431413762  | 0.246797654 | 1.566214444  |
| 2.002233463  | 0.204618097 | 2.229851821  |
| 0.432110379  | 0.501805355 | 1.13441962   |
| 1.101250183  | 1.769281748 | 1.314342611  |
| 2.51204535   | 1.616747862 | 0.101799169  |
| 3.177334761  | 1.598159619 | 0.741954814  |
| 5.653610036  | 0.211408252 | 1.233896941  |
| 9.088475218  | 6.774764184 | 7.710879756  |
| 0.418977098  | 0.480886804 | 1.477234939  |
| 0.539980775  | 2.007727503 | 0.451766158  |
| 3.232209754  | 0.034869494 | 2.870780504  |
| 3.500597597  | 1.828328117 | 1.67549553   |
| 0.644601624  | 2.708046809 | 2.602088669  |
| 1.840221043  | 0.267823868 | 4.519519022  |
| 1.624062081  | 0.147857684 | 0.218587194  |
| 2.099867682  | 1.390707389 | 0.211355461  |
| 4.023200107  | 3.135977611 | 3.007987806  |
| 0.532951205  | 0.589788277 | 1.107424863  |
| 1.53737392   | 3.65869306  | 0.106922382  |
| 0.843921198  | 0.816233305 | 0.10469798   |
| 3.524865318  | 2.317619214 | 0.57749755   |
| -0.022371947 | 2.476442865 | 2.500062586  |
| 2.352139247  | 1.92593051  | 1.762994093  |
| 0.196675359  | 1.937235724 | 2.185965993  |
| 0.452554763  | 1.105954987 | 0.194633452  |
| 0.084966762  | 0.47026299  | 1.326977229  |
| 0.922884469  | 0.404386052 | 0.863932199  |
| 3.920218489  | 0.159099866 | 1.086186332  |

|             |              |              |
|-------------|--------------|--------------|
| 3.171433361 | 2.811726264  | 1.964352334  |
| 2.898759479 | 4.230890983  | 1.027303984  |
| 1.478343162 | 0.630478782  | 1.743342578  |
| 0.191980446 | 1.51791186   | 0.971260931  |
| 2.461375097 | 1.996525875  | -0.148850912 |
| 3.842039829 | 1.868279759  | 1.449192216  |
| 0.170410614 | 4.242255801  | 3.938628773  |
| 0.170108821 | 1.533362666  | 1.057410104  |
| 1.92739302  | 1.197809435  | 0.304912992  |
| 0.528996602 | 2.239847371  | 0.398349782  |
| 1.199811393 | 2.641134221  | 0.788470648  |
| 2.839856615 | 2.005343541  | 1.611888432  |
| 2.366067956 | 1.58074284   | 2.575729226  |
| 3.259558684 | 0.956335756  | 0.547388566  |
| 2.85697445  | 1.66957906   | 1.479764832  |
| 2.025307578 | 0.321645657  | 0.111898959  |
| 0.088310355 | 1.382124002  | 2.523882842  |
| 0.751797519 | 1.240089123  | 0.725169157  |
| 5.254840087 | 4.896869925  | 0.22367674   |
| 1.540151682 | 0.423538663  | 1.255661396  |
| 1.082284948 | -0.208558619 | 2.554718076  |
| 3.631237016 | 3.557113097  | 4.538113894  |
| 2.614288425 | 7.580685511  | 3.06460292   |
| 0.265631176 | 0.236149575  | 0.284193941  |
| 0.764521545 | 1.34261078   | 1.339998438  |
| 0.519485098 | 1.143071731  | 0.002164369  |
| 0.277244826 | 0.135842024  | 0.838843546  |
| 2.276964966 | 2.626891492  | 0.522833557  |
| 0.149553071 | 3.25419441   | 4.729419456  |
| 3.294670213 | 1.035108499  | 1.690061066  |
| 0.29984564  | 3.976953733  | 5.009501925  |
| 2.742151763 | -0.049896028 | 2.409048224  |
| 4.286422779 | 3.744745361  | 0.588981601  |
| 2.353602236 | 1.972197475  | 2.098993767  |
| 1.782237251 | 2.82679582   | 0.900502067  |
| 1.3903348   | 2.671662462  | 3.623343245  |
| 3.755444403 | 2.027972969  | 2.662381129  |
| 0.69921479  | 1.283639883  | 1.25214221   |
| 2.200483288 | 1.358124251  | 0.207076266  |
| 2.116654705 | 2.460774187  | 0.181643668  |
| 1.302934664 | 1.970733819  | 0.199300665  |
| 1.365668244 | 1.623796149  | 0.885537885  |
| 1.975601747 | 0.368687347  | 0.083196805  |
| 3.850263923 | 0.709387077  | 0.978017428  |
| 5.102644381 | 3.897158936  | 1.87263273   |
| 3.137444553 | 1.218585328  | -0.029040834 |

|              |              |              |
|--------------|--------------|--------------|
| 1.295440839  | 2.740039164  | 2.32072811   |
| 2.228091923  | 4.128067481  | 2.269117746  |
| 2.356284435  | 2.085447572  | 1.110477505  |
| 4.091700514  | 3.17050837   | 2.774435936  |
| -0.149794759 | 1.690253087  | 1.362750209  |
| 1.292037037  | 0.836371554  | 0.425595587  |
| 0.312991489  | -0.085036351 | 0.720622956  |
| 2.750336847  | 2.711519246  | 0.705161074  |
| 2.292080478  | 1.765972438  | 1.919411356  |
| 1.829098696  | -0.163794496 | 0.665309004  |
| 2.632977342  | 1.297980372  | 0.447557131  |
| 2.858543416  | 3.027987077  | 2.790234756  |
| 2.350452163  | 1.942551303  | 0.153158336  |
| 1.653254599  | 1.613904971  | 1.847216595  |
| 2.059156669  | 2.296101866  | 1.236709932  |
| 1.489129467  | 0.857081297  | 1.982195372  |
| 0.344612313  | 3.31895067   | 0.009542659  |
| 6.011282116  | 3.902485301  | 0.924789242  |
| 2.093273914  | 2.055114714  | 0.14919018   |
| 0.169532225  | 0.675064594  | 1.762451655  |
| 0.544850852  | 0.186183086  | 0.325365837  |
| 1.710770707  | 0.114084222  | 1.335604163  |
| 1.617069694  | 0.100383109  | 0.017158201  |
| 2.234489871  | 0.545910128  | 0.007297292  |
| 3.327540187  | 4.119203732  | 0.352494643  |
| 2.021341862  | 1.463569518  | 0.813222613  |
| 0.602124302  | 1.36566543   | 1.17454068   |
| 2.547182851  | 2.84547999   | 1.989774889  |
| 1.689698332  | 0.827906866  | 0.479775785  |
| 3.675785853  | 2.319184956  | 0.33977903   |
| 0.056442753  | 0.702868605  | 0.410449332  |
| 0.314098375  | 0.732413456  | 3.175270935  |
| 0.060528751  | 2.752961153  | 1.993842794  |
| 0.048473733  | 2.231157212  | 2.622819224  |
| 2.589527431  | 0.77866651   | 1.806672755  |
| 0.915193519  | 1.151850522  | 1.48492684   |
| 1.811692292  | 0.468511539  | 0.167699857  |
| 1.534649811  | -0.086713761 | 2.129127523  |
| 1.017510757  | 0.683746008  | 0.829109769  |
| 2.273849708  | 3.257031579  | -0.038235574 |
| 0.80459304   | 2.240996708  | 0.548745359  |
| 0.58006869   | 0.129894846  | 1.116612128  |
| 2.269660727  | 0.010007431  | 0.574838161  |
| 0.958675909  | 0.977237907  | 0.278627977  |
| 0.854702922  | -0.153033334 | 0.518963079  |
| 1.681392576  | -0.076941211 | 2.587770196  |

|              |              |              |
|--------------|--------------|--------------|
| -0.211526947 | 2.654546761  | 4.222061991  |
| 3.32221714   | 1.157263879  | 0.090367338  |
| 1.699974988  | 0.911298134  | 0.470499298  |
| 0.226574743  | 0.387931165  | 0.404013059  |
| 1.614915999  | 1.178046718  | 0.75618709   |
| 1.551731707  | 4.582535901  | 3.536394259  |
| 0.115777539  | 1.983963779  | 0.742801378  |
| 0.722523002  | 4.913189455  | 5.128464128  |
| 0.146788003  | 1.824870429  | 0.795267149  |
| 0.865161971  | -0.122933356 | 0.523294582  |
| 2.175487756  | 2.674344763  | 1.777597415  |
| 2.881085581  | 0.234964509  | 2.885503106  |
| 1.171944646  | 0.180977595  | 0.440214293  |
| 0.449844294  | 0.270061121  | 0.626767738  |
| -0.130483981 | 1.459284013  | 0.486167013  |
| -0.259232383 | 0.205445771  | 2.977009125  |
| 2.053899882  | 1.237173045  | 1.452744242  |
| 0.105387445  | 0.870454043  | 0.545797252  |
| 0.551270847  | 2.325810897  | 1.209177933  |
| 2.636387981  | 2.527020256  | 2.565494527  |
| 2.553775635  | 0.667385118  | 0.104444276  |
| 3.139709989  | 2.274167083  | 2.96381558   |
| 0.848659733  | 0.212890686  | 1.681603537  |
| 4.538937393  | 2.273478055  | 2.720096669  |
| 2.506652441  | 1.114738258  | 0.050447768  |
| 4.682566362  | 3.56124649   | 5.202943593  |
| -0.141813116 | 2.613090745  | 2.82105156   |
| 1.856311897  | 1.231377608  | -0.117091471 |
| 1.076681225  | 1.399453317  | 0.490239645  |
| 0.688403076  | 0.3701503    | 1.055522127  |
| 4.130859729  | 3.926048668  | 3.76511576   |
| 3.511656497  | 3.86238763   | 2.502895191  |
| 2.520795415  | 4.260799648  | 3.639365078  |
| 0.700049466  | 2.183863659  | 1.994212844  |
| 2.442183405  | 1.904664805  | 1.313274872  |
| 1.732539026  | 1.927936153  | 0.130811638  |
| 0.739101002  | 0.589194775  | 0.73712882   |
| 0.358873936  | 0.169028576  | 2.061825031  |
| 2.35826732   | 2.135398183  | 0.706457154  |
| -0.123320627 | 0.155301398  | 1.630730784  |
| 0.65519279   | 0.133578801  | 1.43388428   |
| 1.005012973  | 2.56104966   | 0.34202586   |
| 0.879348672  | -0.080560029 | 0.467663139  |
| 0.626939829  | -0.032589685 | 1.239592289  |
| 2.110775347  | 3.036309262  | 0.995659119  |
| 3.487346059  | -0.033961215 | 1.457154249  |

|              |              |              |
|--------------|--------------|--------------|
| 0.490195438  | 0.651324679  | 0.13614055   |
| 3.21955681   | 0.535683746  | 2.284031666  |
| 0.008813994  | 3.450329059  | 2.529511633  |
| 0.110885725  | 2.103433469  | 3.819663143  |
| 2.017927351  | 1.663577776  | 0.544224469  |
| -0.115382714 | 0.743590394  | 0.379743844  |
| 5.618350067  | 1.644243271  | 4.579874739  |
| 0.252849012  | 1.455819956  | 0.505945127  |
| 4.301885033  | 5.579819765  | 0.093681801  |
| 0.743973158  | 0.762221897  | 0.691203096  |
| 1.465101515  | 0.570850802  | 0.988712565  |
| 0.427860533  | 11.99054229  | 11.28283103  |
| 0.173211803  | 0.119419243  | 1.033074017  |
| 0.223815622  | 0.401664414  | -0.110935334 |
| 1.757224467  | 1.456480091  | 1.991006877  |
| 0.39119928   | 2.655612609  | 4.182463305  |
| 2.11356621   | 3.269639107  | 1.953395757  |
| -0.040102721 | 3.835772712  | 1.19831346   |
| 1.401200731  | 2.068073258  | -0.245274834 |
| 0.460032622  | 0.766165965  | 0.055333514  |
| 0.308525657  | 0.985446062  | 1.683284424  |
| -0.178846389 | 1.451798844  | 0.712729513  |
| 2.053440393  | 0.18415881   | 1.616375964  |
| 2.517642725  | 2.4531486    | 0.185110315  |
| 0.874140013  | 2.239010197  | 1.197702586  |
| 2.513980017  | -0.28794023  | 2.335745269  |
| 1.998549844  | 2.198394758  | 1.391107082  |
| -0.040314706 | 0.91640267   | 0.154360545  |
| 1.020314595  | 2.816310712  | 2.614574355  |
| 1.565624006  | 0.862245167  | -0.119611981 |
| 1.071933438  | 1.360024072  | 1.548806807  |
| -0.217451704 | 2.867378429  | 0.568854513  |
| 0.826237694  | 1.357944622  | 0.198072874  |
| 2.191270282  | 1.847437868  | 3.492636066  |
| 1.400254195  | -0.301857621 | 1.311144723  |
| 6.975697601  | 4.019931595  | 1.670341443  |
| 2.09117683   | 2.026339785  | 0.100273679  |
| 1.591875391  | 1.643018842  | 2.316365371  |
| 0.982722867  | 0.040809171  | 0.592088408  |
| 8.026213133  | 8.387372522  | -0.209231365 |
| 1.570972674  | 1.534463199  | 0.384231102  |
| 1.882722148  | 1.435547331  | 1.949087108  |
| 1.963724434  | -0.05392679  | -0.053034287 |
| 0.534925948  | 0.91831079   | 0.893227504  |
| 0.81895641   | 0.901681296  | -0.273111386 |
| -0.240139966 | 2.112732164  | -0.000259721 |

|              |              |              |
|--------------|--------------|--------------|
| 0.6017441    | -0.001672155 | 0.061617732  |
| 3.043907491  | 1.67911953   | 2.362779889  |
| 3.808501425  | 3.312776288  | 0.07827794   |
| 1.590493979  | 2.383025254  | 1.596511761  |
| 0.024551095  | 0.801446002  | 1.071275929  |
| 1.585303194  | 0.828404274  | 0.726222074  |
| 0.507073029  | 0.688609628  | 0.783790009  |
| 1.558304708  | 0.440825778  | -0.095696604 |
| 1.26699851   | -0.06318894  | 1.681545627  |
| 0.269674869  | 1.365296721  | 1.735079953  |
| 2.753924962  | 1.221724408  | 0.141315525  |
| 2.593351937  | 2.000849738  | 1.576285123  |
| 2.028767195  | 2.04964132   | 0.289671037  |
| 1.658051404  | 0.107108104  | 1.644290548  |
| 3.844326282  | -0.232779584 | 2.216367986  |
| 0.291032235  | 4.428757994  | 6.614225286  |
| 1.094904521  | 1.657674836  | 2.329793209  |
| 0.641023395  | 0.567807753  | 0.841466678  |
| 1.405764906  | 1.488244419  | -0.223428563 |
| 0.940725075  | 0.334022263  | -0.202214039 |
| 0.430820017  | 0.413236154  | 0.01946035   |
| 0.493146064  | -0.302389915 | 1.499558585  |
| 1.41552318   | 0.36882144   | 1.073813133  |
| 3.047333377  | 1.822070029  | -0.015089486 |
| 3.222291535  | 5.031561044  | 5.382553808  |
| 0.402527717  | 0.113192149  | 0.874316946  |
| 2.218342631  | 2.173808958  | 3.269732112  |
| 1.034008802  | 0.170397851  | 1.106728356  |
| 2.602992546  | 3.559316979  | -0.138644721 |
| 2.361427955  | 0.794540001  | -0.139192282 |
| 1.586600199  | 7.990412787  | 6.194052081  |
| 1.425047419  | 0.009030159  | 0.19070456   |
| 0.853806732  | 0.394235213  | 1.086178616  |
| -0.251249667 | 2.152712909  | 1.791740501  |
| 0.386999399  | 1.007958893  | -0.005278597 |
| 1.802154422  | 0.014352323  | 1.13639518   |
| 2.312460697  | 1.703889188  | 1.358181856  |
| -0.051227568 | 0.165669856  | 0.04963629   |
| -0.425999714 | 4.621132576  | 9.311536346  |
| 1.182082038  | 1.996640125  | 0.116316239  |
| -0.011770826 | 0.359356481  | 1.671333329  |
| 0.149645556  | 3.628271129  | 2.51016008   |
| -0.084909382 | 1.353529659  | 0.343124715  |
| 2.933736061  | -0.493809557 | 2.58873469   |
| 0.32565625   | 1.061027743  | 1.157857939  |
| 2.555659948  | 0.07527053   | 1.352233873  |

|              |              |              |
|--------------|--------------|--------------|
| 6.937026016  | 2.526264419  | 0.288017006  |
| 2.052390159  | 0.563249229  | 0.457630896  |
| 1.63047452   | 2.197276487  | 2.883768419  |
| 0.047246048  | 0.634513924  | 0.722785033  |
| 0.21403482   | 0.483927871  | 0.466637191  |
| 0.707829373  | -0.323890053 | 0.418091062  |
| -0.31515324  | 4.52062861   | 5.833913361  |
| 0.267302542  | 0.876125053  | 0.755943514  |
| 1.734788078  | 2.205028518  | 3.552623008  |
| 2.103834225  | 2.696953896  | 1.43500336   |
| 0.512640573  | 2.710335444  | 1.451133674  |
| 0.157725485  | 0.927118902  | 0.047046203  |
| 1.285795145  | 2.481036803  | 3.352873079  |
| 1.976672828  | 1.294748829  | 2.789514005  |
| 3.341033799  | -0.186927851 | 3.077272297  |
| 5.890686707  | 2.617279447  | 2.669977357  |
| 1.62339297   | 2.526182897  | -0.241605    |
| 3.457425566  | 2.087111962  | 2.895513347  |
| 0.026601632  | 0.081666406  | -0.026229239 |
| 0.62411451   | 1.139374299  | 2.040382707  |
| 1.128613668  | 1.731657666  | 0.313233844  |
| 1.686059838  | 0.597019029  | 0.151346131  |
| 1.060293708  | 1.254574181  | 0.415078221  |
| 0.803946276  | -0.301461155 | 0.094148975  |
| 1.734955612  | 0.560708779  | 2.327534871  |
| 2.663995304  | -0.395813503 | -0.002305354 |
| 0.320058524  | 3.505866355  | 2.901224162  |
| 3.114207064  | 2.442324336  | 2.23947954   |
| 1.858278934  | 1.439717873  | 0.193679704  |
| 3.831717873  | 1.06988486   | 1.877963881  |
| 0.939231791  | 1.231049159  | 0.526222085  |
| 3.307631365  | 1.03824502   | 0.032372165  |
| 0.444450973  | 2.199383397  | -0.188339564 |
| 3.095775726  | 3.020262952  | 0.048603869  |
| -0.012211202 | 0.581409182  | 0.966618599  |
| 0.484048376  | 1.058929362  | 1.742932409  |
| -0.317784664 | 3.353030824  | 3.643768261  |
| 2.375198552  | 0.12427211   | -0.017000492 |
| 2.72245301   | 1.569600104  | 0.412703316  |
| 2.053454904  | -0.313892127 | 0.217032801  |
| 1.867072305  | 1.998233831  | -0.28398024  |
| 0.300965318  | -0.248954967 | 0.500302635  |
| 1.802852329  | 0.240790284  | 2.855868438  |
| 1.115496137  | 0.191059894  | 0.889850619  |
| 5.515054921  | 1.599968681  | 0.147330024  |
| 1.856953201  | 1.192870986  | 1.043058736  |

|              |              |              |
|--------------|--------------|--------------|
| 1.383768572  | -0.502741554 | 0.072614477  |
| 1.791825532  | -0.066423798 | 1.668081968  |
| 1.648166371  | 0.716907639  | -0.265307622 |
| 2.913156258  | 3.271268325  | -0.327254004 |
| 4.86331025   | 1.383278984  | 2.188847083  |
| 0.478897919  | 0.802857542  | 0.1433728    |
| 1.448789972  | 1.042440966  | 3.260401211  |
| 5.024253404  | 1.175480387  | -0.071600062 |
| -0.224218043 | 0.510838945  | 5.582103151  |
| 0.893851397  | 0.711983465  | 0.968242083  |
| 0.577241558  | 0.004263425  | 0.334088273  |
| 1.377910568  | 1.512866298  | 0.450892863  |
| 2.32300406   | 2.483589661  | 1.906224718  |
| 3.057789983  | 1.29966795   | 0.617725382  |
| 5.644901836  | -0.260446084 | 0.671001505  |
| -0.034732233 | 1.255906992  | 0.165390361  |
| -0.207758126 | 5.361906252  | 3.710187184  |
| -0.278870155 | -0.255887886 | 0.708272418  |
| 0.74137661   | 0.588930464  | -0.166026063 |
| -0.048590042 | 1.415772485  | 0.872936822  |
| 1.174091101  | 0.277916521  | -0.219744159 |
| 1.486456949  | -0.211343215 | 1.680189694  |
| 2.747394508  | 0.058558081  | 2.847246645  |
| 1.376445403  | 1.338819727  | 0.742611127  |
| -0.085947222 | -0.148969598 | -0.303415688 |
| 2.473996876  | 0.937038455  | 0.346245634  |
| 1.633435823  | -0.478490057 | 1.979535977  |
| 0.501240511  | -0.131442411 | -0.370672884 |
| 1.236757487  | -0.275935545 | 4.614642309  |
| 4.89197077   | 3.72455748   | 2.894381615  |
| 2.053164274  | 2.401271167  | 2.24414915   |
| -0.202981994 | 0.163633334  | 0.516323995  |
| 1.084412205  | 2.365172552  | 3.773513981  |
| 3.363783907  | -0.085735978 | 2.993834249  |
| 4.027217854  | 2.553342261  | -0.09525195  |
| 1.781423297  | 0.200646883  | 1.654949232  |
| 0.910916435  | 6.350914271  | 3.492974152  |
| 4.574937703  | 0.229412181  | 9.614085095  |
| 2.150525925  | 3.206979953  | 1.108742395  |
| 2.222660657  | 2.597332678  | 0.860187393  |
| 0.010533528  | 1.150495663  | 5.02664121   |
| 2.976392333  | 3.337478633  | 4.440209215  |
| -0.158346775 | -0.024737315 | 3.493123096  |
| 2.363964045  | 0.796674498  | 0.28291349   |
| 1.821265132  | 2.373712818  | 0.822836401  |
| -0.333039308 | 0.637120096  | 1.263161568  |



|              |              |              |
|--------------|--------------|--------------|
| 2.231865052  | 4.938647146  | 1.695438532  |
| -0.104256199 | 1.324400483  | 1.308728695  |
| 0.261808796  | 0.253442098  | -0.00042822  |
| 0.40307747   | 0.036826616  | 0.486908859  |
| 1.382820008  | 0.313979985  | 0.440158631  |
| 0.780530022  | 0.241877639  | 1.865454049  |
| 0.75799024   | 0.479616592  | 1.892531245  |
| -0.083016439 | 3.966733101  | 5.755185867  |
| 0.215039333  | 1.903531564  | 1.511749351  |
| 5.011159727  | 4.4440712    | 5.296482429  |
| 0.639921453  | 0.744234618  | 0.705216101  |
| 0.627757047  | -0.392948257 | 1.023686596  |
| 3.075106975  | 4.415342401  | -0.309524325 |
| 0.63114754   | -0.131186133 | 1.209146131  |
| -0.045025067 | -0.569648204 | 9.606004322  |
| 1.589053652  | 1.319649196  | 1.586537464  |
| 1.026255527  | 1.383256257  | 0.87279933   |
| 0.631773359  | 0.495855828  | 0.742836293  |
| -0.067651782 | 2.649866679  | 2.433558706  |
| 1.290161419  | 0.736061031  | 0.724435148  |
| 1.10582631   | 2.236144789  | 0.291338152  |
| 1.953667992  | 1.745729955  | 1.610550989  |
| 4.682527063  | -0.39622053  | 4.403336943  |
| 1.265248521  | -0.00491908  | 1.910317629  |
| 2.261699294  | 1.357613744  | 2.295250001  |
| 2.551266181  | 3.055823691  | 2.69544231   |
| 1.120055843  | 1.169263117  | 1.673209406  |
| 4.896431705  | 3.159672967  | 2.344701906  |
| 0.312048091  | 1.922180993  | 1.881176144  |
| -0.372447252 | 0.320703311  | 0.360954927  |
| -0.309865505 | 2.002778937  | 4.585322664  |
| 1.548897171  | 2.361737681  | 0.52527737   |
| 1.577673837  | 2.590967611  | 1.699316121  |
| 0.659638371  | 0.10352809   | 0.910441348  |
| 2.506268952  | -0.352486342 | 0.806737756  |
| 0.28887377   | -0.118975163 | 0.121894766  |
| 2.459795606  | -0.115191927 | 1.237068223  |
| 4.933691594  | 4.778518338  | -0.268097035 |
| 2.361537575  | 1.722946214  | 0.872773473  |
| 0.857362712  | 0.655697626  | 0.928212764  |
| 1.539403342  | 0.358675334  | 1.259859769  |
| 2.492232056  | 1.1808506    | -0.240569944 |
| 1.616546487  | 3.387273309  | 3.845184134  |
| 1.224116549  | 1.507508413  | 0.207181918  |
| 0.366946499  | 1.070687366  | 1.28051623   |
| 2.575501119  | 1.486459628  | 2.663232661  |

|              |              |              |
|--------------|--------------|--------------|
| 2.208242223  | 3.927868438  | -0.050406638 |
| -0.178957772 | 0.919590669  | 0.66780179   |
| 1.42956405   | 1.501728569  | 1.589305883  |
| 2.138834169  | 0.914067244  | 1.597618971  |
| 0.799183644  | 1.303060574  | 1.659506751  |
| 0.001019499  | 0.545813509  | 0.107736231  |
| 2.26191728   | 0.610813937  | 1.407314404  |
| -0.467772952 | 1.714416791  | 1.673233924  |
| -0.207666114 | 2.147794432  | 2.182979123  |
| 0.361378874  | -0.445704509 | 1.2180485    |
| 3.67907181   | 5.437321559  | -0.369259486 |
| -0.120790802 | -0.288337542 | 0.818037102  |
| 0.945238721  | 2.37398128   | 1.790384205  |
| 1.210354551  | 0.099316382  | 0.466032874  |
| 0.844568809  | 1.147959867  | 1.834194272  |
| 0.043703363  | -0.063791348 | 0.429144684  |
| 3.050731172  | 3.127369697  | 2.287301865  |
| 0.980168952  | 0.920384763  | -0.319112932 |
| 0.074876482  | 1.079036223  | 2.855083121  |
| -0.030250689 | 4.722694866  | 3.939335689  |
| 1.33342471   | 1.142328014  | -0.387766541 |
| 2.93639554   | 1.143593014  | -0.443559793 |
| 1.757110021  | 2.552297615  | 1.221881977  |
| 0.706690626  | 0.150185022  | -0.264903655 |
| 4.197089449  | -0.435063376 | -0.690338817 |
| 4.64204595   | -0.573122519 | 1.289969353  |
| 2.174195595  | 1.255011459  | 0.650145512  |
| 1.091065884  | 1.748983052  | 0.702762337  |
| 5.000358574  | 5.068304575  | 1.901227128  |
| 1.706636239  | 1.410762595  | 0.464568613  |
| 0.492922267  | -0.335322756 | 0.783498177  |
| 2.482501987  | 1.355917198  | 0.204543557  |
| -0.422808481 | 4.083856394  | 2.179644556  |
| 0.67248229   | 0.637203405  | -0.224570363 |
| 3.75771847   | 0.005809313  | 2.077457818  |
| -0.331322015 | 0.446750888  | 2.395682669  |
| 0.606438526  | -0.57488056  | 1.592225263  |
| 1.015664345  | 0.483296974  | 0.332826763  |
| -0.465469032 | 2.039282126  | 0.329428966  |
| 0.135558432  | 0.832946766  | -0.593137432 |
| 0.820013406  | -0.324931071 | -0.528966512 |
| 3.894515398  | 2.491067587  | 4.441931187  |
| 1.581664316  | 1.346253044  | -0.514361663 |
| 2.690857008  | -0.114743139 | 0.518816367  |
| -0.51172301  | 4.906782612  | 8.307649952  |
| 1.275740059  | 1.234877362  | 1.652226891  |

|              |              |              |
|--------------|--------------|--------------|
| 0.435693368  | 0.713867613  | 0.518938236  |
| 0.704447777  | -0.710028584 | 1.490021038  |
| -0.263111129 | 2.138076576  | 2.720031312  |
| 0.788399594  | -0.441037758 | 0.614594698  |
| 5.235349137  | 3.652285248  | -0.441687042 |
| 2.501605117  | 3.049130196  | 2.73870021   |
| -0.569906899 | 0.631480181  | 2.048938935  |
| 0.025075643  | 0.128113251  | -0.354228348 |
| 2.327423283  | 1.981875907  | -0.319794861 |
| 4.245170421  | -0.267517664 | 5.544364593  |
| 2.412756452  | 1.522326542  | 1.291424805  |
| 0.474833338  | 1.233762251  | -0.394194841 |
| 0.823667231  | -0.259972754 | 1.485233833  |
| 0.79329106   | -0.013188873 | 1.256254851  |
| 0.525937838  | 1.374221777  | 1.175634714  |
| 1.87283889   | 1.175576061  | -0.328956481 |
| -0.11961324  | -0.347227101 | -0.24471273  |
| 0.401818895  | 0.013308501  | -0.119825778 |
| 0.485388027  | 0.647777375  | 1.778474447  |
| 0.020553204  | 1.276415626  | 0.906913087  |
| 0.112276691  | -0.126601881 | 0.89872693   |
| 0.065099321  | 1.263796474  | 1.790163596  |
| 2.444361305  | 0.465363191  | -0.048025177 |
| 1.179741058  | -0.529639164 | 2.535836736  |
| -0.106189925 | -0.217760368 | -0.324574231 |
| -0.18295434  | 2.558269248  | -0.073831735 |
| 1.125231258  | 0.380514867  | -0.12133982  |
| -0.114886114 | 1.699315182  | 1.371039321  |
| -0.554153544 | 0.468649427  | -0.027402287 |
| 1.025767932  | 2.117448134  | 0.171870753  |
| 7.008440846  | -0.536473322 | 5.119390673  |
| 1.806729117  | 0.132200282  | 1.984247241  |
| 0.561713958  | 1.736542788  | -0.640764117 |
| 3.941929914  | 2.341181325  | -0.244765528 |
| 1.744907585  | 0.929268429  | 2.937323967  |
| 1.713600266  | -0.418695115 | 0.878004286  |
| 4.478980877  | 3.098830657  | 4.296380809  |
| 1.176384586  | 3.099862737  | 4.428821617  |
| -0.578846378 | -0.009482004 | 1.062771531  |
| 1.146997507  | -0.59291273  | 0.80628308   |
| 2.676431974  | 1.752756732  | -0.60692239  |
| 1.596004683  | 2.012567799  | -0.184416462 |
| 3.632809393  | 3.290688139  | 3.798664893  |
| 1.442852924  | 0.105090794  | 1.14947661   |
| 1.162281957  | -0.361769204 | 0.089329898  |
| -0.247830998 | 4.586000392  | 5.722780026  |

|              |              |              |
|--------------|--------------|--------------|
| -0.350661762 | 1.13999284   | 2.374524126  |
| -0.013961174 | -0.436469248 | 1.358375668  |
| 2.780777898  | 2.002492681  | -0.076696182 |
| 1.240268033  | 1.362356466  | 1.244101695  |
| 1.528725506  | 2.406845198  | 2.469428003  |
| 0.700818206  | 0.527394724  | 0.302631088  |
| 0.870630941  | -0.321377038 | 0.423056992  |
| 1.47892853   | 0.018997668  | 1.844603531  |
| 0.283533663  | -0.016420331 | -0.711976252 |
| 2.080592964  | 1.661738159  | 2.319098836  |
| -0.59598762  | -0.186508279 | -0.253945801 |
| 2.055240382  | -0.760912644 | 2.938577111  |
| 1.487144975  | -0.462795569 | 1.8235068    |
| 0.762304394  | 0.15619525   | 0.868884992  |
| 1.008083547  | 1.135574947  | -0.548963911 |
| 1.105416328  | 0.398518804  | 0.030921253  |
| 0.554747295  | 3.237702743  | 0.56122028   |
| 2.475920912  | 1.205685123  | -0.408762352 |
| 1.100752827  | 0.548654606  | 0.832035796  |
| 2.080411005  | 1.216690556  | 1.803411848  |
| 0.781122003  | 0.255000736  | 0.82150986   |
| 0.639939074  | 0.261108989  | 1.211412531  |
| -0.29733454  | -0.003710369 | 1.437893898  |
| 0.103519891  | -0.283386342 | -0.392786301 |
| 1.443973064  | 0.700382344  | 0.642449737  |
| 0.602204679  | 1.412122976  | 0.221242009  |
| 0.741718638  | -0.421002617 | -0.46304735  |
| 0.113503998  | -0.608039071 | -0.024639977 |
| 2.535137556  | 2.457739797  | 2.492932161  |
| 1.771162196  | -0.637932335 | 2.378399582  |
| 1.410550794  | 0.062341094  | -0.606860069 |
| 1.599775446  | 0.071515471  | 0.460036982  |
| 2.126430191  | 1.083795742  | 1.742834915  |
| -0.648911727 | 0.358035245  | 0.098284306  |
| 2.116878948  | 2.65547867   | 1.518541241  |
| 1.306308665  | 0.280472841  | 0.306244134  |
| 1.657903201  | 0.281480026  | 0.010384713  |
| 5.2417722    | -0.298494944 | 4.707239883  |
| -0.108567097 | 0.527949159  | 0.032425872  |
| 0.088633521  | -0.286388633 | -0.546401197 |
| 2.541536577  | 1.031047052  | 2.486977199  |
| 1.566011171  | 0.961400204  | 0.517260253  |
| 1.475879365  | 1.329073166  | 0.65003448   |
| 0.087317983  | 3.394829392  | 2.798771837  |
| 1.812178541  | -0.204963931 | 1.933915524  |
| 4.005789943  | 5.056567757  | 4.308314808  |

|              |              |              |
|--------------|--------------|--------------|
| 1.056593624  | -0.224195031 | 1.710649025  |
| 4.95401932   | 2.360537401  | -0.436882896 |
| -0.170046589 | 0.240329402  | 1.122912512  |
| 0.345571075  | 0.842639092  | 1.155595711  |
| 0.297477827  | 0.026268796  | 0.416917936  |
| 2.032414223  | 2.886158367  | 3.250327992  |
| 1.705664145  | 0.365121883  | 1.149779832  |
| 2.296808333  | 5.161900674  | 3.397891137  |
| 4.940311365  | 2.524100534  | 2.154784336  |
| -0.220614381 | 0.64047565   | 0.122134144  |
| 2.736729469  | -0.125592033 | 1.078693001  |
| 0.836028807  | 0.369757336  | 0.266390803  |
| 0.628801488  | 1.273515694  | 0.268756465  |
| 1.366215548  | 1.987428657  | 3.025432093  |
| 0.201226715  | 1.497357426  | -0.490250894 |
| 0.420921215  | 0.896911237  | 0.551388774  |
| 0.261025236  | 0.571238649  | -0.490994025 |
| -0.37455054  | -0.096719884 | 0.540366227  |
| 0.498549565  | -0.088908949 | -0.320614228 |
| -0.134975458 | 2.172381157  | 3.124722275  |
| 0.992760736  | -0.449424564 | 0.486905834  |
| 1.24299449   | 1.665266632  | 0.093899699  |
| 1.689081969  | 2.642837569  | -0.2339751   |
| 0.478617856  | -0.317875041 | 0.171284505  |
| -0.809661259 | -0.426733241 | 0.040827281  |
| 0.359634674  | 0.089003549  | -0.095332743 |
| -0.761836793 | 1.762941188  | 0.146471077  |
| 2.198109876  | -0.027276758 | 1.269029053  |
| 3.302392705  | 1.931435204  | 1.261146813  |
| 0.504041079  | 1.710023033  | 1.840562237  |
| 0.712183169  | -0.051836693 | -0.549911221 |
| 0.808474354  | 1.719756603  | 0.007980859  |
| -0.637839425 | 2.109287138  | 2.958008637  |
| 2.132593804  | 2.120882184  | 0.660177891  |
| 1.662452589  | 0.202331914  | -0.19467085  |
| 0.794991458  | -0.380285596 | 0.779401642  |
| 1.164960817  | -0.747869257 | 1.659657981  |
| 1.14447612   | 0.601680955  | 2.212605895  |
| -0.446664813 | 0.031046951  | 0.305027953  |
| -0.262162617 | -0.261167221 | 1.680718048  |
| -0.263628391 | 4.117432765  | 4.18921191   |
| -0.388743327 | -0.502552962 | -0.116525167 |
| 3.255535192  | 0.930416554  | 2.110224157  |
| 3.628773692  | 1.712199822  | 0.244535081  |
| 1.989612313  | 0.493856659  | -0.266281926 |
| 4.215415425  | -0.746967667 | 3.564581397  |

|              |              |              |
|--------------|--------------|--------------|
| 3.006534658  | 1.033219518  | -0.808548964 |
| 0.789005754  | -0.267299216 | 0.200415907  |
| 2.105454849  | -0.483649355 | 1.742306014  |
| -0.195415249 | -0.703397339 | 0.723238271  |
| -0.038837494 | 1.49273568   | 1.032468686  |
| 0.915362456  | 1.379930907  | 1.577161448  |
| -0.779321588 | 1.772757491  | 0.417706917  |
| -0.333611879 | 0.321195168  | -0.016366752 |
| 3.115869572  | -0.121527388 | 4.928678105  |
| -0.330009625 | 0.333225082  | 0.035479938  |
| -0.169837389 | 2.297595214  | 3.382209913  |
| 0.37141102   | 1.519202929  | 4.474513783  |
| -0.586151835 | 1.126123268  | 3.011211898  |
| -0.026030067 | 0.515987821  | -0.479206591 |
| 2.212567447  | 2.514378286  | -0.849029705 |
| 0.169436033  | 0.079005043  | -0.457400709 |
| 0.162025224  | -0.485408974 | -0.020543765 |
| 0.269383447  | 0.350436316  | -0.667679681 |
| 2.046680493  | 3.797475801  | 1.157987083  |
| 3.018956196  | 1.636087199  | 1.773666175  |
| 0.735502247  | 1.058046031  | 1.41510245   |
| 2.288418088  | 1.969716667  | 1.582100738  |
| -0.387389392 | -0.209536936 | 0.990733152  |
| 1.124184886  | 0.664218263  | -0.509207193 |
| 3.377523876  | 0.237283035  | -0.756135411 |
| 4.047697805  | -0.858415497 | 4.011341598  |
| 0.089913572  | -0.384562181 | 0.586914306  |
| 3.276699826  | -0.691128236 | 3.265987071  |
| 0.307939709  | 1.242264731  | -0.659235508 |
| -0.578385011 | 4.54284593   | 2.130254247  |
| 0.428448918  | -0.659230705 | 0.313565828  |
| 0.725765297  | 1.133673676  | -0.491470578 |
| 0.818260472  | 2.601268071  | 0.742807983  |
| 0.355533347  | -0.454235775 | -0.617331051 |
| 0.451086748  | -0.260859833 | 0.072696132  |
| 0.53194575   | -0.427840596 | 0.014706726  |
| 3.184351895  | 1.87241955   | 1.122355092  |
| 0.319490458  | -0.7319055   | 0.834299832  |
| 1.862307939  | 1.688043253  | 1.027195566  |
| 4.156241862  | -0.694760575 | 0.113267918  |
| 2.260686672  | 0.449288895  | 1.212926142  |
| -0.619385819 | 2.206545205  | 2.93042569   |
| -0.446545271 | 2.320513913  | 1.59122175   |
| 1.873800304  | -0.258584561 | 1.479753253  |
| 1.058011614  | 0.861724758  | 1.035085326  |
| -0.552774264 | 1.462796364  | 5.017951002  |

|              |              |              |
|--------------|--------------|--------------|
| 0.00954865   | -0.688032042 | -0.779775838 |
| 0.728266691  | 0.941652035  | 0.892729037  |
| 4.06720226   | 0.056149476  | 0.377273428  |
| 2.546041648  | 2.695039726  | 0.2086758    |
| 0.512794948  | -0.201069885 | 1.067873475  |
| 1.608120473  | 0.506511038  | 0.216050411  |
| 1.433769787  | 2.191715872  | 0.633958708  |
| 7.401459131  | 7.189501803  | 2.569587178  |
| 2.10377019   | -0.783984675 | 0.660468131  |
| 1.950757655  | 0.236912079  | 0.42508583   |
| -0.086730981 | 0.29745288   | 0.849535724  |
| 1.713979421  | 1.696248704  | -0.467403261 |
| 1.299019893  | 1.135902114  | -0.312566987 |
| 1.318494823  | 1.319561995  | 2.490572082  |
| -0.090086449 | -0.561621395 | 0.20990106   |
| 0.829170603  | 1.031050893  | 0.813393486  |
| 0.014054219  | 0.407729529  | 0.163352754  |
| 3.3539368    | 2.550962686  | 0.586206587  |
| 0.468848828  | -0.856862608 | 0.760303385  |
| -0.192958202 | -0.282608493 | -0.755433674 |
| 0.936944999  | 1.424586229  | 0.063977393  |
| -0.330447052 | 0.88350796   | 0.629639708  |
| 1.18853492   | 0.744638409  | -0.169984932 |
| 1.357757789  | 1.907278712  | 2.616637877  |
| -0.908868724 | 2.743097928  | 3.57007681   |
| 3.517362841  | 2.916526213  | 2.972380377  |
| 0.677962952  | 1.492520003  | -0.187103772 |
| 0.280983738  | 0.825794394  | -0.385319951 |
| -0.283931199 | 2.865833162  | 3.05506969   |
| 3.810392064  | -0.589851441 | 1.402611903  |
| 0.07139732   | 1.234557464  | 0.78219195   |
| 1.548154702  | 0.987614184  | -0.499467294 |
| -0.648836112 | 2.038419484  | 1.184853609  |
| 0.073306139  | 1.04331668   | 0.828109475  |
| 0.986356477  | 0.826771383  | 1.806605158  |
| 2.485606953  | 3.939332365  | 2.514480701  |
| -0.095547948 | 1.297413701  | 1.612612558  |
| -0.012684296 | 1.665380806  | 2.804753716  |
| 0.307287673  | 2.679147423  | 0.650697807  |
| -0.645772471 | -0.538659269 | 1.716416531  |
| -0.409579743 | -0.210301503 | -0.183639512 |
| 2.624879061  | -0.548754945 | 2.88456976   |
| 2.247721757  | 0.188790172  | 0.3877606    |
| 0.267381235  | 0.146560004  | -0.642634775 |
| 1.067541192  | -0.221316794 | 1.002434579  |
| 2.762317664  | 2.603193239  | 2.053332552  |

|              |              |              |
|--------------|--------------|--------------|
| 0.910150743  | 0.143136439  | 3.247412907  |
| 3.918085992  | 1.952633554  | -0.603740451 |
| 0.319491523  | -0.693690722 | 0.122777858  |
| 1.902298781  | -0.48831269  | 1.015443741  |
| 1.722361532  | 2.648935567  | 0.059111166  |
| 1.644562529  | 0.690031527  | 0.713772776  |
| 1.841343272  | 0.885810882  | 0.93273701   |
| 0.335885299  | -0.628172347 | 0.909188396  |
| 2.005863243  | -0.234225635 | 1.818550569  |
| -0.818232403 | 1.68417583   | 1.235526004  |
| -0.656256507 | 4.837467927  | 5.119129067  |
| 0.370367806  | -0.32493054  | 2.02931531   |
| 1.660481812  | 1.031353551  | 1.420524477  |
| 0.054369246  | -0.326036689 | -0.589011356 |
| -0.770893282 | 2.217322978  | 2.426895215  |
| 0.592095526  | 1.427957301  | 2.287646     |
| 0.142469993  | -0.359664969 | 0.579683477  |
| 0.365646526  | -0.238614165 | -0.657563245 |
| 1.665035842  | 1.820613365  | -0.686167259 |
| -0.83310618  | 0.46793054   | 1.547764798  |
| 1.045327114  | 3.622068498  | 3.046495556  |
| 0.257112711  | 0.789321179  | 1.551063299  |
| -0.167860732 | 0.434426055  | 1.784942897  |
| 0.21954756   | -0.176331792 | 0.398137907  |
| -0.716065598 | 4.441022     | 4.696457715  |
| -0.062970887 | 1.459130373  | 0.662856439  |
| 0.478131742  | 1.842693481  | 0.82460547   |
| -0.662644026 | 0.318499692  | 0.221175081  |
| -0.137458858 | 0.90267987   | -0.404115619 |
| 0.644522263  | 1.305217737  | -0.52092367  |
| 1.137371705  | 3.520655286  | 4.126025525  |
| -0.208710219 | -0.489783877 | -0.726833078 |
| -0.85128035  | 0.498285211  | 0.673094889  |
| -0.868515863 | 0.087114828  | -0.49176524  |
| 6.171699165  | -0.72553125  | 7.372979144  |
| 0.608465585  | -0.58555121  | 1.861320147  |
| -0.198581508 | 1.613666425  | 0.895158349  |
| 4.087909553  | 0.492165497  | 5.806746902  |
| 3.581923166  | -0.499009357 | 3.089371623  |
| 1.375702537  | 0.95277099   | 1.075907991  |
| 1.704056122  | 0.600431876  | 0.907274813  |
| -0.205360606 | 1.507878949  | -0.387884177 |
| 3.262477102  | 6.309342683  | 5.066177392  |
| 2.873587906  | 3.42707827   | 6.576971019  |
| 10.43915363  | -0.726171006 | -1.035461291 |
| 0.425945805  | 1.936787002  | 1.162873588  |



|              |              |              |
|--------------|--------------|--------------|
| -0.468828442 | -0.751901369 | -0.492405215 |
| 7.42358422   | 4.233859054  | 4.968620097  |
| -0.026291021 | 0.192944977  | -0.082919958 |
| -0.29202409  | -0.138043491 | 1.172105137  |
| 2.447841407  | 1.409913911  | 0.455938812  |
| 0.239752762  | 1.679394644  | -0.374835337 |
| 1.554303482  | -0.442090591 | 1.963858195  |
| 0.307615101  | 0.185919027  | -0.214132317 |
| 0.442016261  | 1.590346031  | 1.717362223  |
| 3.41335513   | -0.502036494 | 6.995689372  |
| 4.297223012  | -0.784497367 | 3.936832386  |
| 0.509777852  | 0.190407452  | 0.740435692  |
| 2.364167526  | -0.782542123 | 1.830449295  |
| 1.984071835  | 2.017578908  | 1.891290591  |
| 3.499114679  | 4.695861614  | 5.303756963  |
| 1.447691632  | 0.255877236  | 0.428740749  |
| 2.483502894  | -0.658740422 | 1.636640176  |
| 0.266595933  | -0.278678667 | -0.619317443 |
| 1.554917037  | 1.004533276  | -0.675184667 |
| -0.507326082 | 1.096605164  | -0.20440216  |
| 1.482320532  | 2.179768301  | 1.164933602  |
| 1.023294181  | 2.489918455  | 2.846810504  |
| 6.641448721  | -0.896745219 | 6.887410093  |
| 2.542523155  | -0.914167206 | 2.486197032  |
| 0.101800993  | 2.339733264  | 1.041591054  |
| 0.524176611  | 1.291924176  | 1.390470609  |
| 1.042118708  | -0.121665077 | -0.78098538  |
| 2.820852849  | 5.47881798   | -0.445032647 |
| 0.040307979  | 0.047350108  | -0.368743451 |
| 5.420192887  | 1.437408575  | 2.810209353  |
| -0.345755806 | 0.65152026   | 3.188392364  |
| 0.989431279  | -0.26230046  | -0.325555639 |
| 4.497736791  | 3.513973345  | -0.447103271 |
| 0.30469464   | -0.234924519 | 0.197624601  |
| 4.022579215  | 4.274310043  | 4.246898047  |
| -0.008207209 | -0.042218447 | -0.748847556 |
| 1.106687973  | 0.985170447  | 0.724583573  |
| -0.473514484 | 2.718898469  | 2.54137462   |
| 3.417095742  | 0.111916206  | 3.33683843   |
| 1.860709459  | 0.923124641  | -0.128380768 |
| 0.792201244  | 0.015770285  | -0.024211411 |
| 2.610317676  | 0.424625701  | -0.353172462 |
| -0.036792855 | -0.127459903 | 0.149106076  |
| -0.214450445 | 3.161886124  | -0.990419778 |
| 1.171109183  | 2.1753993    | 6.374314253  |
| 1.55881448   | 4.531684042  | 0.303541801  |

|              |              |              |
|--------------|--------------|--------------|
| -0.831940104 | 10.41806491  | 4.321224143  |
| 0.2422523    | -0.109857073 | 0.243924231  |
| -0.241125027 | 0.782267103  | -0.402445789 |
| 5.693752929  | -0.666216342 | 2.645934934  |
| -0.249003388 | -0.425860516 | 2.98745306   |
| -0.991479695 | -0.022309668 | -0.946829453 |
| 1.561114104  | -0.261911225 | -0.577564562 |
| 1.76794282   | 2.066885057  | 4.385426455  |
| -0.364781649 | 0.542529206  | -0.095620811 |
| 0.298909805  | -0.72853018  | 0.965390235  |
| -0.153333956 | 3.852229651  | 2.59965919   |
| 1.615434346  | 0.474430597  | 1.06637376   |
| 1.016004773  | 4.666348877  | 6.198868076  |
| -0.200264853 | 0.88765033   | 0.136389658  |
| -0.566009228 | 0.722316872  | -0.76591885  |
| 2.682173428  | 1.616843772  | 2.332692332  |
| 0.819027651  | -0.778136613 | 0.425111438  |
| 0.345973939  | 0.76829174   | 0.081333087  |
| -1.10911069  | 0.776986218  | 0.822623723  |
| 1.756415688  | 0.312874972  | 0.128251305  |
| 0.300819466  | 0.940098261  | 2.304409714  |
| 1.36307017   | 1.333914861  | -0.342654665 |
| 0.001777008  | 0.745334396  | -0.325941563 |
| 0.595286247  | 0.871838278  | -0.727097243 |
| 2.76528651   | -0.269826764 | -0.723871262 |
| -0.477344553 | -0.265573101 | 0.78784382   |
| 2.172180238  | 1.172352697  | 1.327796579  |
| 1.675969888  | 0.337371318  | -0.356283234 |
| 1.124022845  | 0.634015258  | -0.754168509 |
| 0.246186525  | -1.05074729  | -0.044820327 |
| 1.564464448  | 0.366806824  | 1.771654354  |
| 1.418968421  | -0.733212522 | 1.901119917  |
| 1.250321732  | 0.645494541  | -0.74194167  |
| 0.416978637  | 0.182508308  | -0.941618838 |
| 0.85289031   | -0.776639984 | 0.146777067  |
| 2.094453087  | -0.009726857 | 1.643675187  |
| 2.084354264  | 1.968430187  | 1.740459729  |
| 5.497127041  | 4.155502356  | 3.976734298  |
| 2.198929916  | 2.549253877  | 0.658098893  |
| 5.298439256  | 3.919359029  | 3.646001166  |
| 4.444378605  | -1.105577464 | 3.924647701  |
| 4.603208519  | 2.732707983  | -0.685850908 |
| 0.165176883  | -0.615602117 | -0.339404365 |
| -0.425212823 | -0.953137956 | 0.074692761  |
| 1.977791412  | 4.342802134  | 4.773760132  |
| 0.60250176   | 1.746115965  | -0.12980037  |

|              |              |              |
|--------------|--------------|--------------|
| 0.045532064  | 0.756101368  | 0.443791187  |
| 0.302509246  | -0.33099911  | -0.220945586 |
| 1.847988641  | 2.365074246  | 0.841055264  |
| -0.378056779 | 4.461767511  | 6.136093714  |
| 0.809508866  | 0.314282537  | 0.211971356  |
| 2.943089483  | 2.4003501    | 2.676026139  |
| 0.388570005  | -0.306321078 | -0.835266212 |
| -0.836069365 | -0.372435981 | -0.00524877  |
| 2.330621624  | 4.141815956  | -0.517452816 |
| 2.675552235  | 1.32368895   | -0.730599719 |
| -0.030261633 | -0.061946483 | 0.366829081  |
| 1.470908744  | -0.671267663 | 1.450219684  |
| 3.030524403  | 2.952035585  | 3.532281982  |
| -0.844151181 | 1.897646036  | 1.033205684  |
| -0.733059977 | -0.724260923 | -0.13508601  |
| 1.18421597   | 2.497650871  | -0.375531403 |
| 0.05997576   | 0.314313067  | -0.329958029 |
| 1.769149178  | 1.036870994  | 0.963928548  |
| -0.315438506 | 0.343612309  | -0.040774715 |
| 1.583404007  | 0.212930755  | 1.269315407  |
| -0.974008045 | 1.235669551  | 1.985071873  |
| 1.926606942  | 2.975641509  | 2.545053955  |
| 0.95311317   | 0.359161932  | 1.441144989  |
| 3.809466498  | 3.763743249  | 2.849807989  |
| 1.302177344  | 0.833060601  | 1.155720777  |
| 1.106598203  | -0.236750121 | -0.928646079 |
| -1.028744518 | 3.860152372  | 2.37768534   |
| -0.626520231 | 0.485010379  | -0.440936157 |
| 1.358656316  | 0.823675101  | 2.293910373  |
| -0.158741006 | -0.227592444 | -0.98346524  |
| 2.68001508   | 0.70828069   | 0.920586637  |
| 0.840377938  | 0.705103027  | 0.068512969  |
| 6.392442523  | 5.637803722  | 0.406243381  |
| 2.142215578  | 2.799075339  | 1.24270245   |
| -1.163978067 | -0.113814955 | 1.102166942  |
| -0.74612313  | -1.110727069 | -0.496050464 |
| 2.655674507  | 0.374672716  | 1.184176525  |
| 0.167596639  | -0.644861435 | -0.071649756 |
| -0.261140329 | -0.561609246 | 0.15606164   |
| 1.819105457  | 1.659079817  | 3.727321484  |
| 1.877161045  | -1.001887557 | 2.05175509   |
| 0.316329793  | -0.060504514 | -0.690432693 |
| 1.928743253  | 1.276033427  | 2.269160655  |
| 6.001593861  | 1.752458568  | -0.698201199 |
| 0.979338023  | 0.221750776  | -0.633366807 |
| 0.9506932    | -0.073855765 | -0.262532332 |

|              |              |              |
|--------------|--------------|--------------|
| 1.304181787  | 1.523602255  | 0.849851722  |
| -0.989997465 | 0.448764797  | -0.207878775 |
| -0.939916681 | 4.309821915  | 1.453461443  |
| 0.932299677  | -0.40936965  | 0.28051334   |
| -0.547880945 | -0.119723737 | 0.906508036  |
| -0.493757294 | 1.469369948  | 4.008143085  |
| 0.949089227  | 0.113656306  | 0.418970154  |
| 1.319301112  | 0.121171263  | 0.641686584  |
| 0.417875861  | 0.88658241   | 0.956018108  |
| 0.752998452  | 0.204179933  | 4.64741766   |
| 1.379592927  | -0.724611339 | 0.210460811  |
| 4.538737782  | 3.17222522   | 2.590319389  |
| 2.212957716  | 2.65593361   | 2.901416392  |
| 5.757729265  | 0.420049421  | -0.952381058 |
| -0.059475446 | 6.196952941  | 5.672536693  |
| -0.075668885 | 6.94278242   | 2.331692422  |
| 1.609383075  | 1.105031766  | 1.555946061  |
| 1.949076096  | 1.001105092  | 3.74063892   |
| -0.612794049 | 0.406797068  | -1.022649797 |
| 0.251741666  | -0.186609033 | -0.272545356 |
| 6.551105488  | 3.140540599  | 3.743179602  |
| 1.763385304  | 4.636206614  | 5.629167706  |
| 2.231567448  | 0.332527434  | -0.036527659 |
| -0.873673332 | -0.567142552 | -0.713168867 |
| 4.371067451  | 0.467442852  | -1.021547153 |
| 2.016662127  | 0.896957332  | -0.277659049 |
| 1.477633239  | -0.854358312 | 1.026343981  |
| -0.237295968 | -0.127796297 | -0.809815938 |
| 0.123881541  | 0.081443601  | -0.926030026 |
| 0.959790628  | 0.888076218  | 0.815501154  |
| 1.807903053  | -0.378973533 | -0.483674067 |
| -0.49279961  | 0.592776614  | -0.108883772 |
| 9.580485221  | 8.878838278  | 6.149072673  |
| 0.334640763  | 1.274085105  | 0.266292347  |
| 5.388927086  | 2.40278004   | -0.977717455 |
| -0.111548144 | 1.821220395  | 3.434389515  |
| -1.214480435 | 0.965644898  | 0.414255568  |
| -0.847532714 | 0.107263089  | 0.291349749  |
| 3.038007283  | 0.864603208  | 1.639733223  |
| -0.929609719 | 0.023346359  | 1.2409833    |
| -0.694161381 | -0.276705497 | -0.297317367 |
| 0.927465606  | -0.427003743 | 2.936894271  |
| -0.408623879 | -0.205132977 | -1.053942454 |
| 1.245558986  | 0.092258511  | 1.060012414  |
| -0.605919964 | -0.108636225 | 1.491773155  |
| 2.529935296  | 1.174205818  | 5.08170405   |

|              |              |              |
|--------------|--------------|--------------|
| -0.986936016 | -0.552217677 | -0.277539861 |
| -0.933961525 | 2.208256752  | 1.047084473  |
| 3.145777548  | 2.129886849  | -0.572207408 |
| -0.151011137 | 0.064679278  | 0.44412333   |
| -0.111586015 | 0.753036698  | -0.835720174 |
| -0.020996104 | 0.816270348  | -0.103282897 |
| 1.085531575  | -0.130252469 | -0.217979215 |
| -0.699393016 | -1.106615618 | -0.264378548 |
| 0.768875869  | -0.278694064 | 0.032494164  |
| 0.358941027  | 0.197872929  | -0.389826783 |
| -0.762784991 | 2.042069507  | 5.667090327  |
| -0.192112365 | -0.114582826 | 0.985674756  |
| 5.727548955  | 1.699329114  | 2.93598026   |
| 1.892569048  | 1.554680276  | 1.210320861  |
| 5.012043376  | 6.343640243  | 0.272412385  |
| -0.544353    | -0.04777606  | -0.011845026 |
| 2.403119266  | -0.672120144 | 1.66640347   |
| 1.568639424  | 3.569716994  | 2.539892333  |
| 0.842245029  | 1.82933333   | -0.402279892 |
| -0.605805929 | 1.26559714   | 1.939896579  |
| -0.371597349 | -0.246688979 | -0.614917711 |
| -0.334205723 | -0.102828759 | -0.192346648 |
| 0.0874327    | -1.123152414 | 0.226113666  |
| 1.163631063  | -0.805941399 | 1.565108701  |
| 0.857390655  | -0.667745495 | 0.528739041  |
| 2.413263663  | 2.605715127  | 2.787878785  |
| 1.424676331  | 0.926534593  | 0.144482323  |
| -0.79838714  | 1.350174161  | 0.567217681  |
| 4.103224412  | 2.922613766  | 1.197281232  |
| 6.453482045  | 5.950406668  | 3.51083231   |
| 0.482936409  | -0.35160648  | 0.951623462  |
| -0.201174625 | 2.2285666    | 3.582402145  |
| 0.205456526  | -0.167300907 | -1.150870044 |
| 0.459723494  | 0.694898018  | -0.532976719 |
| 5.833647686  | 0.413124059  | 0.091223249  |
| 0.088252305  | 0.515608359  | 0.541738423  |
| -0.628696861 | -0.523922506 | 1.642168154  |
| 0.727792854  | -0.172278932 | -0.401696181 |
| 5.949718481  | 4.950756118  | 7.21832175   |
| 0.064610701  | 0.04461538   | -0.314522315 |
| -0.182243022 | 0.246643836  | 2.949018398  |
| -0.811436611 | 1.297113627  | 0.185375555  |
| -1.057279462 | -0.391874684 | 0.191946733  |
| 0.602077482  | -0.703441723 | 1.462976183  |
| 6.360142831  | 3.108458473  | 2.897342089  |
| 0.130721327  | -0.213655368 | -0.850377603 |

|              |              |              |
|--------------|--------------|--------------|
| 1.566447724  | -1.089798488 | 0.761750275  |
| -0.663480226 | -0.282629716 | 0.735119068  |
| -0.664092986 | 4.033276286  | 2.892283591  |
| 0.180444114  | 0.120118423  | 1.283833234  |
| 0.826985246  | 0.826709803  | 1.773239721  |
| -0.860086258 | -0.105875096 | -0.18897347  |
| -0.761143347 | 3.553286688  | 2.337437241  |
| 6.80165573   | -0.560485655 | 1.074506617  |
| -0.298779063 | -0.41936429  | 0.738549173  |
| 4.042299767  | -0.414157327 | 4.802806081  |
| -1.109350523 | 6.869256483  | 7.147833556  |
| -0.657026403 | -0.307943632 | -0.89424425  |
| 2.147004985  | -0.814930293 | 1.49931199   |
| 1.984678219  | -0.003311023 | -0.247902518 |
| 1.008244968  | 0.472814159  | 1.053860635  |
| 0.280065353  | 1.595564338  | 0.906188875  |
| 2.98868958   | 0.328338914  | -0.290706654 |
| 1.461210654  | 2.606666468  | 0.919186629  |
| -0.707506467 | 2.924136745  | 2.985352373  |
| 0.412999671  | 1.545475097  | 1.467622799  |
| 0.400873989  | 0.800503261  | -0.259061836 |
| -1.108559858 | 0.164885501  | -1.173096597 |
| 2.050496861  | 0.7751393    | 0.163545404  |
| 1.413090061  | 2.689441777  | 1.325964851  |
| -0.929373263 | -0.337112301 | 0.175357053  |
| -0.808782716 | -1.287806664 | 0.020925398  |
| 0.842824475  | 0.787992901  | 0.052779703  |
| -0.78598894  | -0.646640014 | -0.936392695 |
| -0.962948325 | -1.1787188   | -0.752116027 |
| 0.608654238  | -0.71762934  | 0.309840064  |
| -0.864504766 | -0.817812199 | 0.734328924  |
| -0.252585562 | 0.49365204   | -0.465043873 |
| 0.384079924  | 1.151514071  | -1.278389116 |
| 1.258463693  | -0.600870424 | 0.789232455  |
| -0.85705771  | 0.875600145  | 0.759882239  |
| -0.89856232  | 1.373190794  | -0.356430136 |
| 9.609110405  | 5.265505224  | 5.185074264  |
| 0.889822328  | 0.461332849  | 1.267887888  |
| 3.0955497    | 2.790516799  | 1.329763753  |
| 0.08973638   | 0.841701948  | 1.523583496  |
| 3.624036232  | 3.573130126  | 1.327499223  |
| 5.696436951  | -1.200759132 | 5.672469499  |
| -1.157568259 | -1.099112544 | 1.218033027  |
| 1.510905483  | -0.469251643 | 0.803147288  |
| -1.17731925  | 0.545815233  | 3.617180952  |
| -0.600226148 | 0.699414397  | -0.302805508 |

|              |              |              |
|--------------|--------------|--------------|
| 0.858241339  | -0.534274827 | -0.982954144 |
| -0.128826235 | -0.727477819 | 0.20026006   |
| 4.302939538  | -0.01649854  | 0.85896396   |
| 3.184222775  | 3.539044275  | 0.121904222  |
| 0.716631536  | -0.203614134 | -0.265351902 |
| -0.045207361 | -0.33847023  | -0.985002543 |
| -0.305296265 | -0.763069503 | -0.540970755 |
| 0.253466732  | -0.560556183 | -0.581809039 |
| -0.132657282 | 1.587929453  | 0.450881584  |
| 2.261207772  | -0.709035162 | 1.025482727  |
| -0.251949506 | 0.677522891  | -0.298714671 |
| -0.777237071 | 3.704021648  | 0.932498287  |
| -1.014380366 | 2.551957647  | 6.101753209  |
| -0.490213288 | 0.232448253  | 0.683108146  |
| -0.216581923 | -0.333784335 | -0.160609074 |
| -0.298709627 | -0.185113566 | -0.904180998 |
| -1.240252622 | 0.186361328  | -0.454149089 |
| 0.084640658  | -0.599349232 | 0.299862207  |
| 0.485854211  | 0.558284493  | 0.418446832  |
| 1.831938804  | 0.43223089   | -0.671927175 |
| 1.373423565  | -0.000444589 | 1.144863922  |
| -0.343648814 | 1.675250843  | 1.084921199  |
| 2.783900009  | 1.548273289  | -0.218098671 |
| 1.994681168  | 0.658213237  | -1.005463146 |
| 5.311055017  | 2.119897906  | -0.542737496 |
| -0.61894526  | -0.191398069 | -0.667391526 |
| 7.243938978  | 2.684975516  | 3.968087568  |
| -0.24709692  | -0.696630999 | 0.522674709  |
| 0.820408281  | -0.882407989 | 1.068294489  |
| 7.726074666  | -1.042242879 | 2.450663941  |
| 5.34253223   | 4.656584547  | -0.704456678 |
| -0.765239686 | 1.108511258  | 1.175061296  |
| 4.15686662   | 2.883541246  | 3.179301896  |
| 0.85598866   | 0.005258231  | -0.416485278 |
| -0.347519044 | 1.125612917  | -1.131979902 |
| -0.847556129 | 2.954628924  | 3.142438291  |
| 2.415821924  | 1.253589606  | 2.547594372  |
| -0.887710639 | -0.742080643 | -0.090244111 |
| 0.463418923  | 0.299733985  | -1.400699393 |
| 1.560983332  | 3.16983525   | -0.798293357 |
| -0.485004118 | -0.038977885 | 2.086127041  |
| 0.646691423  | 1.591407207  | 0.212485087  |
| 1.009616163  | 0.424772307  | -0.471471573 |
| 2.349789379  | 0.043009198  | 8.101180793  |
| 0.37685437   | -0.664539692 | 0.141536105  |
| 2.146735542  | 4.256802191  | -0.626536492 |

|              |              |              |
|--------------|--------------|--------------|
| 1.454743809  | -1.265269379 | -0.98119778  |
| -1.079483327 | -0.314129767 | -0.775371719 |
| 1.663528147  | -0.758712131 | 1.544250613  |
| -0.501388117 | 0.245897231  | 0.488145745  |
| -0.354225229 | -0.082259227 | -1.076469605 |
| 0.019704398  | -0.776373486 | -0.607168133 |
| -0.893252988 | -0.8761428   | -0.761340696 |
| 1.127070794  | -0.375480184 | 1.014278724  |
| 2.88781047   | 2.535617353  | 1.93416061   |
| -0.033808617 | 0.970789499  | -0.857587738 |
| -0.094682977 | -1.470200837 | -0.411542435 |
| -1.180561107 | 2.94297029   | 3.55207473   |
| -0.345660349 | 1.483826187  | 0.428674177  |
| 1.233090901  | -0.059227704 | -0.845085435 |
| 1.637547845  | 0.490781583  | 0.910850855  |
| 1.510240093  | 2.609518316  | -0.275183163 |
| -0.446908058 | 0.952944843  | -0.751865867 |
| 3.885242578  | 6.12806457   | 6.557331887  |
| 0.484290615  | 0.711321675  | -0.687270564 |
| 0.566216508  | 3.8592287    | 3.142107734  |
| 0.314919484  | 0.270117991  | -1.28257001  |
| -0.16703569  | -1.30684141  | -0.979479656 |
| 2.763111578  | 2.244326492  | 3.470728152  |
| 2.421898216  | 4.774760017  | 5.757787603  |
| 1.19892142   | -1.419274863 | -0.263641201 |
| -0.178741417 | -0.391977378 | 0.16053688   |
| -0.110200657 | 0.625574423  | 0.012134475  |
| -0.241237011 | -0.333856646 | 1.059259867  |
| -1.098779227 | -0.107450675 | 0.479431412  |
| 0.350105806  | 0.010579253  | -1.136146083 |
| -0.187047448 | 1.447107919  | -1.104985659 |
| 0.161024286  | -0.137747275 | -1.391998523 |
| 4.858334283  | -0.817460249 | 4.653416059  |
| -1.240738057 | 1.344353172  | 1.522147685  |
| 0.254235725  | -1.033223041 | 4.05968439   |
| -1.341764863 | 0.199012934  | 0.296358411  |
| 2.381759344  | 1.870609883  | -1.144791036 |
| -0.683251927 | -0.442773807 | 0.280940659  |
| 0.273074477  | -0.232001966 | -0.376931481 |
| 3.423857374  | 4.383684078  | 4.174692936  |
| 0.082756849  | -0.010281235 | 0.757924148  |
| 0.854651874  | -0.857383262 | -0.010947007 |
| 0.464470884  | 0.601081636  | -0.499257066 |
| 2.862626322  | -1.306934164 | 0.655291487  |
| -1.141095119 | 0.138223046  | 1.991067166  |
| 0.342977006  | -1.265060769 | 1.086426661  |



|              |              |              |
|--------------|--------------|--------------|
| -1.144305576 | 0.38751709   | 0.287822751  |
| 0.627486736  | -0.19693586  | 0.67910485   |
| -0.722254439 | -0.96644683  | 0.156633493  |
| 0.952664514  | 1.059040727  | 0.686909734  |
| 1.148803375  | 0.220037247  | 2.96107617   |
| 1.461897904  | 1.56188643   | 0.200526015  |
| 2.659687138  | 0.352660293  | -0.324274285 |
| 0.831242191  | 0.648212111  | 0.214450098  |
| 1.80220891   | 0.114550605  | -0.522850796 |
| 0.976762157  | 1.493310539  | 0.003551919  |
| 4.566837311  | -1.290121913 | 1.514403873  |
| -0.538417202 | -0.175647748 | 0.029619961  |
| 3.727587953  | -0.345976251 | -1.180286132 |
| -1.34904099  | 0.964290122  | 1.04565819   |
| -1.076028794 | -1.357987574 | -0.993528729 |
| 2.161914866  | 1.66876103   | 2.51706032   |
| 5.258875067  | 4.775945798  | 3.168633398  |
| 2.672981132  | 2.054329009  | 5.817491844  |
| 0.530340243  | -0.5907552   | 0.645978522  |
| -1.079244903 | -0.94218577  | 0.006886281  |
| -0.720128067 | -0.776938266 | -0.65342832  |
| -0.861396678 | 2.438194882  | -0.461183813 |
| 0.580825435  | -0.028783813 | -1.401095973 |
| 2.126885212  | 2.326523897  | 1.320460662  |
| 1.564542928  | 0.09981114   | -0.641600423 |
| -0.380337306 | -0.743699132 | 0.625449471  |
| 0.601427539  | 1.104332811  | 2.394970086  |
| 5.436446496  | 3.278469323  | -1.039681898 |
| 1.428334676  | 3.221908817  | 0.033156055  |
| 2.105251624  | 0.442292816  | -0.656653222 |
| 0.374769945  | -0.999147269 | 0.41006716   |
| 1.779548964  | 1.36044219   | -0.798461454 |
| 1.172884336  | 0.131898852  | 2.128187064  |
| 2.098258497  | -0.616985935 | -0.918931108 |
| 0.18612644   | -0.772958271 | -1.422408725 |
| -1.448792831 | 0.368899404  | 0.421642421  |
| -0.062187939 | -0.114097343 | -0.084024134 |
| -0.903375119 | 2.013819413  | 5.462056074  |
| 1.615888036  | 0.846043982  | -0.93923257  |
| -1.00462879  | -0.074606525 | 0.47728152   |
| -0.90819559  | -0.496465716 | 0.161044963  |
| -1.427987219 | 2.682163616  | 1.699719941  |
| 0.268561545  | 0.44757279   | 0.061443279  |
| 0.796323113  | -0.509822571 | 1.523047636  |
| -0.090289433 | -1.131346856 | -0.541874594 |
| -1.274808853 | 1.003459551  | 1.813392788  |

|              |              |              |
|--------------|--------------|--------------|
| 1.429317768  | -1.205958969 | -0.331245958 |
| 0.626450146  | -0.858730436 | -0.114001689 |
| 2.733927478  | -0.726857573 | 2.44920676   |
| 0.779793811  | -1.368437853 | -0.59462466  |
| 3.340899562  | 5.005310884  | 3.680381869  |
| 1.426940575  | -0.447483702 | 1.587600825  |
| -0.128589773 | -0.34508853  | -0.75653627  |
| 3.691036172  | 4.899474086  | 3.737834675  |
| 0.982789758  | -0.094417773 | 1.619832235  |
| 1.546466279  | -0.969151683 | 1.481875319  |
| -1.10613596  | -1.39086783  | -1.049492369 |
| 1.705736189  | 1.966692563  | 1.473329943  |
| 1.162747107  | -0.733765624 | 0.547966527  |
| -1.229209199 | -0.543848958 | 0.02549395   |
| -0.363844507 | -0.729634508 | 1.223003143  |
| 1.194767713  | -0.617905455 | 0.671298237  |
| -0.189992461 | -0.430407575 | 1.129466688  |
| 5.616103593  | 1.887867953  | -1.207594517 |
| 1.288437183  | -1.054264354 | -0.537943219 |
| -0.171793663 | -0.501940314 | -0.83547463  |
| 1.312949632  | 0.165001778  | -0.702359092 |
| 0.697957537  | -1.115241748 | 2.727046665  |
| 0.539035043  | -0.261033209 | -0.881481056 |
| 8.981089591  | 6.469458052  | 6.521368126  |
| 1.952611627  | 5.873306243  | 5.63903408   |
| -0.608742843 | -1.358404161 | -0.979618407 |
| 0.557665917  | 0.222272693  | -0.219876872 |
| 0.249148272  | -0.978715286 | -0.900921596 |
| 3.810541454  | 5.059426949  | -1.066329091 |
| -0.034964638 | -0.272844606 | -1.174205587 |
| -0.623735511 | -0.642429362 | -0.543686841 |
| -1.04129034  | 0.642146296  | -0.853652609 |
| -0.284409599 | -0.673731796 | -0.253331882 |
| -0.424552933 | 0.568803153  | 0.627536804  |
| -0.432400804 | -0.268943764 | -0.432073636 |
| 0.024469671  | 3.66317863   | -1.308208411 |
| 0.232575568  | -0.292048298 | 0.269253473  |
| 1.627186834  | 4.659508568  | 3.04953006   |
| -0.362739018 | 0.348435493  | -0.502236636 |
| -0.001413435 | -1.198728315 | -0.628420153 |
| -1.176100801 | 3.280937512  | 1.53752322   |
| -0.336454408 | -1.203068502 | 0.309961909  |
| 1.649457253  | 0.971377546  | 1.266262046  |
| -0.099365915 | -0.645675044 | -1.395124274 |
| -0.662256714 | 2.503926442  | 1.195308093  |
| 0.455633746  | 0.009293218  | 0.632826925  |

|              |              |              |
|--------------|--------------|--------------|
| 0.746731649  | 1.377882902  | -1.04001673  |
| 1.184137955  | -1.233970251 | 3.193069622  |
| -0.907687704 | 0.062187024  | 0.792292716  |
| 0.446816712  | 0.445962904  | -0.827679414 |
| 2.150227136  | 0.430721521  | 1.524900963  |
| 1.599330082  | 2.021515881  | -0.717352875 |
| 1.533575243  | 2.081145223  | -1.184384058 |
| 0.942328995  | 0.873392226  | 0.044842644  |
| 0.654353309  | 0.982401541  | 2.052857697  |
| 0.468461222  | 2.014497442  | 1.588589937  |
| 2.927469414  | -1.296974218 | 1.317599661  |
| -0.963607393 | -0.844906066 | -0.238321856 |
| 0.448422037  | 0.82007788   | 0.208512403  |
| 7.716543392  | 2.012908878  | 3.190234889  |
| 5.159974568  | 1.694240584  | 1.677503703  |
| 0.184659118  | -0.241836389 | -0.105094882 |
| -1.393784504 | -0.282066132 | -1.091640737 |
| 0.338258224  | 2.24153614   | 1.526072358  |
| 0.863026169  | -0.338313022 | -0.329330807 |
| -0.912733363 | -0.378431794 | -1.118768105 |
| 0.133419033  | 0.446543636  | -0.449146111 |
| -1.244470723 | -1.499032256 | -1.248883266 |
| 0.218298795  | 4.601575602  | 5.271720666  |
| -0.425711955 | -0.621780998 | -0.349803439 |
| 2.27431245   | -0.176523693 | 1.814463533  |
| 1.75373103   | 2.01836098   | -0.222072303 |
| -1.220801964 | -1.447425017 | -1.191223757 |
| -0.750256959 | 1.210926388  | -0.563201479 |
| -1.121574523 | 0.035092948  | 0.087805979  |
| -1.04649835  | 1.591590245  | 2.143804762  |
| -0.215827505 | -1.095317632 | 0.011776662  |
| -0.472683052 | -1.145052452 | 0.807189328  |
| 1.9861224    | -1.322995951 | 0.274438162  |
| -1.155560624 | -0.392400657 | -0.754932082 |
| 2.403919736  | 1.271019955  | 1.249980102  |
| -0.9081289   | 0.186398191  | -0.794493759 |
| -0.618420099 | 1.216410269  | -0.876399407 |
| -0.755845135 | 4.732318772  | 0.877342043  |
| -0.497971467 | -0.587739124 | 0.810620936  |
| -0.590995819 | -0.029085227 | -0.346162679 |
| 0.439383393  | 0.309264543  | -0.188221286 |
| 2.934834137  | 0.659028828  | 1.544655131  |
| 1.892501852  | -1.100789681 | 3.253462023  |
| 0.037595531  | -1.135908637 | -0.982930073 |
| -0.526438797 | -0.192171497 | 0.148704571  |
| 3.532021392  | 0.802298235  | -1.294691555 |

|              |              |              |
|--------------|--------------|--------------|
| -1.366835799 | -0.677103869 | -0.208044066 |
| -0.399031635 | -0.544238536 | 0.380527711  |
| -1.220897136 | -0.073183685 | 0.903688707  |
| 3.505974706  | -1.52270185  | 0.147671407  |
| 0.114230766  | -0.451794999 | -0.407052324 |
| -1.2965126   | -1.544129421 | -1.173041851 |
| 0.081712643  | -1.518349464 | 0.96065197   |
| -1.637461553 | -1.024728218 | 3.114860491  |
| -0.971155477 | -1.101148773 | -0.523898513 |
| 1.320420539  | -1.02676851  | 0.519782465  |
| 0.850259731  | -0.266362656 | -0.949652128 |
| -1.009499104 | -1.468474346 | -0.940363405 |
| -1.333146249 | -1.582575945 | -1.240611614 |
| 0.571741521  | 0.01291137   | -1.596969565 |
| 0.676146553  | 0.577152354  | -0.62279904  |
| -1.171110192 | 0.812826675  | 2.238823805  |
| 2.010279206  | 0.166021123  | 0.302085182  |
| -0.739192792 | 1.373592832  | 1.782616287  |
| 1.296076487  | -0.335333317 | -1.067131061 |
| -1.132433532 | -1.485431059 | -1.097723499 |
| 4.68340806   | 2.28599535   | -0.174203374 |
| -0.571269189 | 0.957180414  | 1.809888452  |
| 0.458133531  | 0.817596095  | -0.370149456 |
| -1.139990154 | 2.044151366  | 2.257090662  |
| -0.500706759 | -0.39430896  | 1.809097068  |
| -1.031229137 | 1.300835837  | -0.431396904 |
| 0.111684735  | 1.477179548  | -0.854368443 |
| 0.653545559  | -1.196379874 | 0.507302352  |
| -0.449019317 | -1.640041237 | -0.321827315 |
| -0.237129281 | -1.49879035  | -0.279008618 |
| -0.373787753 | 0.882359342  | -0.043631416 |
| 0.08123602   | 1.438848471  | -0.536353267 |
| 0.571568193  | 0.417511598  | 0.9199501    |
| -0.222050521 | -0.674581484 | 0.549780675  |
| 0.527153958  | 2.375915723  | -0.443243748 |
| 1.68704757   | 1.40707748   | 0.644470248  |
| 2.246836353  | 1.571750383  | 1.558523482  |
| -1.646817714 | 0.414002401  | 1.081402542  |
| -0.855580482 | 0.152872795  | -0.415378086 |
| -0.626957773 | -0.290918241 | -0.009988261 |
| -0.971740465 | -0.018804409 | 0.745417201  |
| 1.558225044  | 3.622218963  | -0.079676066 |
| 2.715591033  | -0.494532508 | -1.590486948 |
| -0.856631414 | -0.451077965 | -0.503169792 |
| 6.365272355  | -1.086640483 | -0.738825508 |
| -0.380388355 | -1.36516298  | -0.854836403 |

|              |              |              |
|--------------|--------------|--------------|
| -0.143638068 | -0.651528385 | -0.147263648 |
| -1.425390929 | -1.517112961 | -1.249576748 |
| -1.194181588 | 2.974102923  | 2.458844436  |
| -0.621040404 | -0.11761779  | -0.361507218 |
| 1.415712751  | -0.930403949 | -1.159842973 |
| 1.112204925  | 1.344111394  | 1.465738588  |
| -1.365806313 | -1.572168886 | -1.224738896 |
| 1.506798817  | 0.696884989  | -0.728414552 |
| -1.076328512 | 2.047496424  | 0.419200344  |
| -0.859743322 | 0.423927384  | 0.313069101  |
| 1.435897459  | 0.409850568  | -1.583529455 |
| -0.356512607 | -1.573603925 | 0.133244512  |
| -0.79390548  | -0.67634853  | 0.34941462   |
| -0.267395939 | 3.232824385  | 2.553209242  |
| 0.116311572  | 0.861737832  | -1.47662674  |
| -0.483752374 | 1.428514861  | 0.190805527  |
| 7.800181616  | -0.777976089 | 3.108006266  |
| -1.591017879 | 2.989322991  | 0.810832462  |
| 2.6710365    | 2.019207653  | 0.031955324  |
| -1.186352585 | 1.318402222  | -0.50445871  |
| -0.608747332 | 1.568880454  | -0.491038593 |
| 3.345807724  | 1.361927811  | 0.204303096  |
| -0.02456772  | 2.614621019  | 4.398345652  |
| 0.377637766  | 0.270861744  | -0.246479723 |
| 4.404060921  | -0.972926907 | 3.708974025  |
| -0.398667378 | -1.07688508  | -1.095292028 |
| -1.090948272 | -1.225524995 | -0.880755105 |
| -1.115328461 | 3.520533713  | 3.993544863  |
| -0.309006096 | -1.168933381 | 1.01111203   |
| -1.578664868 | -0.521692309 | -0.140851675 |
| -0.063307556 | -0.492258318 | -1.23509815  |
| 0.637299613  | 0.900010842  | 3.639730464  |
| -0.64930411  | -0.251110821 | -0.757092799 |
| 2.910491001  | 4.672265767  | 4.924364319  |
| 1.200575438  | 0.829970628  | 1.583465122  |
| 0.157118977  | -1.099641733 | 1.435727379  |
| 2.845751547  | 0.546230873  | 0.161375091  |
| -0.344311112 | -0.852548874 | -0.146037535 |
| 0.509074358  | 0.272838899  | 1.584128931  |
| 0.769915853  | 0.292146652  | -0.734007977 |
| 3.226869851  | 3.500893228  | 3.890656154  |
| 2.903701507  | 0.0863383    | 0.976125625  |
| -0.679630501 | 0.057932964  | -0.442866834 |
| 0.315713762  | 1.592863298  | -0.381777873 |
| -0.638646259 | 1.157104894  | -0.1032755   |
| -0.572897774 | 7.318918641  | 5.2212791    |

|              |              |              |
|--------------|--------------|--------------|
| 0.551334869  | 0.350342055  | -0.575195479 |
| 0.555371378  | 3.439747426  | 2.432772104  |
| 0.660965773  | -0.772447255 | 0.194174992  |
| 2.364055626  | 0.871484662  | 1.682672754  |
| 0.720582608  | 0.468379677  | 0.830936021  |
| 2.26415243   | -1.585339808 | -0.97976156  |
| 1.112282003  | 1.53374491   | 1.427704899  |
| 0.653754937  | 0.213144415  | -0.93018325  |
| 1.282416275  | 1.004141102  | -0.148979943 |
| 2.632027121  | -1.460750703 | 1.162517341  |
| -1.102636281 | 0.397806696  | -0.442282081 |
| 6.544649505  | 7.866490104  | -1.412058044 |
| 1.842969704  | -0.996290063 | -0.894144967 |
| 1.35181835   | 0.875505978  | 0.382395046  |
| -0.431729202 | 0.239727951  | -0.559009523 |
| -0.749409895 | -0.95393536  | -1.099563621 |
| -0.90503563  | -0.617731372 | -0.267818131 |
| -1.361521119 | -0.951644709 | -1.130877794 |
| 0.778596662  | 0.420112204  | -0.04254426  |
| -0.513887075 | -0.304976197 | 0.229550803  |
| -0.066118009 | -1.354076348 | 0.690901916  |
| -0.690589934 | -1.310677839 | -0.435111377 |
| -0.258039321 | 0.21804262   | 0.778753445  |
| -0.905933    | -0.51679789  | 1.126959553  |
| -0.486310401 | 0.554360977  | 0.252191549  |
| -1.007898169 | -1.535143942 | 0.201702047  |
| 1.866051501  | 2.901788666  | 2.699366486  |
| 0.074814675  | -0.907609107 | -1.507377031 |
| 2.198301433  | -0.168163146 | -1.487729567 |
| -1.186182541 | 0.183267583  | 0.847648801  |
| 0.572855837  | -0.327800166 | 0.983801596  |
| -0.13824089  | 1.11123494   | 1.667452019  |
| 0.041737409  | 1.505518289  | -1.315637588 |
| -1.042605783 | -0.810688042 | -0.378326593 |
| -1.713359857 | 1.838218537  | 0.948609704  |
| -1.062678528 | -0.341856916 | -0.288843217 |
| 1.111365379  | 2.126288112  | 0.723104639  |
| -1.552125013 | -0.404103031 | 1.837632498  |
| -0.120182642 | 0.828302466  | -0.227324178 |
| 0.848727669  | 1.152412428  | -0.344378238 |
| -0.029030898 | -0.410483099 | -1.019211047 |
| 5.263210715  | 2.695443705  | -1.219656757 |
| -1.414950885 | 2.397595518  | 2.649991862  |
| -0.7541959   | -0.828141557 | -0.367032254 |
| 4.366045057  | 1.339884871  | -1.797582361 |
| 0.076298889  | 1.745923055  | 5.635047315  |

|              |              |              |
|--------------|--------------|--------------|
| -0.239280391 | -0.103278091 | -0.303715596 |
| 0.996132174  | 0.829838874  | 1.114987647  |
| 1.166834532  | -1.371251343 | 7.938496854  |
| 3.949060311  | -1.440188493 | 2.266725697  |
| 0.493128804  | 1.894158727  | -0.358919002 |
| -1.322043327 | -1.379571015 | -0.961946814 |
| -1.28197657  | -0.293918173 | -1.055276235 |
| 1.004246393  | 2.733100529  | 0.567252605  |
| -0.895829077 | -0.869259449 | -1.007241177 |
| 0.429709941  | -0.03143077  | -1.433118343 |
| -1.391457636 | 0.912126302  | 1.668229309  |
| -1.304576101 | -1.746375589 | -1.419699286 |
| 0.613836818  | 0.393468592  | 0.474074936  |
| -0.169611114 | -1.23473884  | -0.404944945 |
| 2.323244296  | 3.141980026  | 0.444170629  |
| 0.636474881  | -1.495759356 | 0.124353444  |
| -1.339639552 | -1.661810697 | -1.326669265 |
| -1.453199382 | 1.994037036  | 3.738136097  |
| -0.46377033  | -0.58611789  | -0.178988318 |
| 0.768759875  | 2.199179145  | 0.146434299  |
| 1.961696705  | -1.478309371 | -0.200855696 |
| 0.763131224  | 1.051744659  | -0.74776712  |
| -1.074432525 | 2.730810872  | 2.510781532  |
| 3.157883974  | -1.253938825 | 2.506076082  |
| 1.568519098  | 1.098219437  | 2.54051834   |
| 0.516282096  | 0.000699529  | -1.010162886 |
| -1.48384723  | 0.503620165  | 1.056220256  |
| -1.202811174 | 1.889503735  | 0.494424929  |
| 0.193104943  | -1.633854936 | 1.764149028  |
| 1.039909299  | -0.753411522 | -0.983322243 |
| 0.866167171  | -1.268332843 | 1.460388536  |
| 0.479548106  | 1.089139865  | 0.651179044  |
| -0.293471538 | -1.498974883 | 0.293253444  |
| -0.308407335 | 0.430779162  | -1.056975492 |
| -1.177243969 | 0.224670638  | -0.097443029 |
| 0.772203035  | -1.12231412  | -1.000160604 |
| 0.095425158  | -1.660522959 | -1.391234019 |
| -1.62961317  | -1.760644162 | -1.368839945 |
| 1.962069927  | -0.124010593 | 0.229031373  |
| -1.148537456 | -0.434411828 | 0.526746504  |
| 0.316470192  | -0.159607529 | 0.124653632  |
| -1.679871073 | -1.535323178 | -0.02445297  |
| 0.636907885  | -0.384266858 | -1.219336767 |
| -1.273436165 | -0.172102188 | -1.214231898 |
| 4.191961853  | 4.234556396  | -1.857877001 |
| 4.733669185  | 3.351497556  | -0.523330663 |

|              |              |              |
|--------------|--------------|--------------|
| 0.533242002  | -0.008256922 | -0.592169175 |
| -1.584749175 | -1.594391279 | -1.342411245 |
| 0.750065284  | 1.440771041  | 1.842229513  |
| -1.603527567 | -1.286749484 | 0.607163099  |
| 0.253073455  | -0.42307494  | -1.144503315 |
| 2.196099964  | 0.742611037  | -1.052121187 |
| -0.749416194 | -0.741120507 | -0.214210464 |
| -0.661519233 | 0.000406764  | 1.188204495  |
| -1.278164984 | 0.302072326  | 0.872289809  |
| 2.79818106   | 2.737185485  | 0.383683172  |
| 3.543539184  | -1.645798006 | 1.041331921  |
| 2.348434095  | 1.944491685  | 4.651624846  |
| -1.118557664 | 0.225873204  | 0.078311336  |
| 3.669000944  | 2.620091328  | 1.134700416  |
| -1.373114633 | 1.036543567  | 0.706545224  |
| -1.461367921 | -1.648217072 | -1.554685728 |
| 0.939732254  | -0.641665926 | -0.429676995 |
| -0.384657207 | 0.951109669  | 0.308101813  |
| -1.792149159 | 0.079676422  | 5.110857516  |
| -0.622972934 | 0.389111096  | -0.607788526 |
| 0.711360671  | -0.358161676 | 1.739491157  |
| -1.39800413  | -1.715592558 | -1.474502888 |
| -0.981943707 | 0.275347465  | -0.583236467 |
| 1.711241089  | 4.723316799  | 4.351539259  |
| 0.921642656  | 0.574066499  | -0.032768301 |
| 0.494564036  | -1.172676753 | 3.27832987   |
| -0.268585945 | 0.55538318   | -1.730383418 |
| 0.446163096  | -1.09677939  | -0.690513084 |
| -0.344444877 | -0.768178817 | -0.68896872  |
| 3.065054737  | 2.980666379  | -1.308760206 |
| 4.626046373  | -1.347815996 | 1.791956938  |
| -0.981510527 | -1.209146506 | -0.449236948 |
| -1.137713566 | -0.571286493 | 0.266221141  |
| 3.870224051  | 0.609869717  | -0.854946868 |
| 0.765847327  | -0.243608052 | 1.855056151  |
| -0.910937435 | -1.399101943 | -0.290566799 |
| 1.482483815  | 0.423103483  | -0.035109097 |
| -0.169231172 | -0.289146762 | -1.020946796 |
| -0.081988423 | -1.442818246 | 0.710608601  |
| 0.787572129  | -1.309871816 | 0.071889941  |
| -1.751982469 | 1.260272291  | 3.547113782  |
| 0.257745113  | -0.362471938 | -0.471301573 |
| 2.126822454  | 1.678649991  | 1.739022772  |
| -1.610593446 | -1.829390194 | -1.571229062 |
| 3.102275758  | 0.128245878  | -1.142087134 |
| 4.462509506  | -0.925945845 | 2.744962662  |



|              |              |              |
|--------------|--------------|--------------|
| 0.610184308  | 1.008853546  | 0.412008629  |
| -1.340417809 | -0.095377254 | -0.815847215 |
| 1.42780803   | 2.556065196  | 0.269921885  |
| 1.111051973  | 0.187488837  | -1.083680073 |
| 3.890150615  | 2.265248492  | 3.220034908  |
| 2.25952612   | 1.166846999  | 3.224258391  |
| 1.578296584  | 0.893172231  | -0.550957091 |
| 0.843240961  | -1.498326805 | 0.452853857  |
| 2.91448666   | 3.943371287  | 1.118459033  |
| -1.129881174 | -1.38000138  | -0.930421316 |
| -0.241097384 | -1.214926486 | -1.221122657 |
| -0.640452569 | -0.89253782  | -1.825049967 |
| 3.187312017  | 0.148466161  | 1.907332681  |
| 0.627083465  | 0.181052763  | 0.041929875  |
| 1.526806454  | -1.66164424  | 0.593840129  |
| -0.947814715 | -0.642076792 | -1.522591378 |
| 3.891926162  | -1.364065896 | -1.742134732 |
| -0.001811371 | -0.21650679  | 0.362746359  |
| 7.22433681   | 4.526592246  | -1.310586938 |
| -1.571566554 | -1.747723684 | -1.518204236 |
| 1.61941321   | 2.148686272  | -1.330628709 |
| 1.222457826  | 1.553725321  | 2.715123896  |
| -1.396091838 | -1.787880646 | -1.392256494 |
| 2.820425445  | -0.874583927 | -1.840523964 |
| 1.650874336  | -0.685197056 | 0.031578597  |
| 0.033863028  | -0.117803694 | -0.780320446 |
| -0.705995397 | -1.183442411 | -0.981393185 |
| -1.563295337 | -1.868459563 | -1.546692865 |
| -0.117317653 | -1.455977468 | -1.467079029 |
| 2.363483182  | -0.697139757 | 0.164005885  |
| 0.889575641  | 0.346489644  | -1.252932003 |
| -1.752691042 | 1.633782242  | 3.779759637  |
| 3.45425982   | -1.059958053 | 1.936044373  |
| -0.215068627 | -1.05282974  | -1.476732205 |
| 0.000470484  | -0.91292663  | -1.586279303 |
| 0.011404441  | -1.606139641 | 1.190370428  |
| 0.534613401  | 1.143214847  | 1.994169282  |
| -1.63459832  | -1.808361277 | -1.702970984 |
| -1.462629765 | -0.683343577 | -0.90678658  |
| 0.807098787  | 0.453823403  | -1.614852682 |
| 8.812289648  | 2.531865086  | -1.458620329 |
| 4.094335103  | 2.46865665   | 5.014766219  |
| 3.587105138  | -0.284594913 | -1.360227341 |
| 2.500149536  | 2.190585684  | -0.822123612 |
| -1.023085791 | -0.426835722 | -0.888635334 |
| -1.650859128 | -0.411240356 | -1.504058011 |

|              |              |              |
|--------------|--------------|--------------|
| 1.037053656  | 2.007998902  | -0.072694352 |
| -1.842585821 | 0.451470812  | 0.729747351  |
| 2.659421123  | -0.899290794 | 0.795954234  |
| 1.960897281  | 1.446942906  | -0.490597297 |
| 1.720719191  | -0.555591034 | -1.450343971 |
| -0.568527484 | 0.763927921  | 1.321311871  |
| 0.082745312  | 1.354902738  | 3.407622587  |
| 0.007742621  | -0.432850765 | 0.169737008  |
| -1.022788834 | 3.53752363   | 3.208460715  |
| 1.270287895  | -0.794686592 | 0.882048664  |
| -0.343945226 | 1.332671667  | 0.522777905  |
| -1.077243223 | 0.148888386  | 0.807844481  |
| -1.07659277  | -1.148158562 | -1.97768146  |
| -1.154720311 | -0.565725624 | -1.194556377 |
| -1.45658687  | -1.664401166 | -1.337915592 |
| 0.805604146  | 2.28952952   | 2.547257534  |
| -1.793806126 | 4.032773135  | 2.930187927  |
| 2.168148933  | 0.19850236   | 0.372173862  |
| 0.063311772  | -0.607509063 | 0.022171066  |
| 0.131990127  | -1.361432172 | 2.54156767   |
| 0.648137962  | -1.424822544 | 0.304198295  |
| -0.8277276   | -1.654632209 | -0.030004855 |
| 0.247106401  | 1.247788199  | 0.686169655  |
| -0.905606524 | 0.235616586  | -1.351166251 |
| 6.761509474  | 3.043997512  | 4.032231821  |
| 0.126832059  | 0.661324786  | -0.310684418 |
| 2.562160349  | -1.016782366 | 3.287294287  |
| 4.65102367   | -0.875806965 | 1.504699018  |
| -1.011652153 | 1.727674789  | -1.582843162 |
| -0.66372785  | -0.636173392 | -0.855186695 |
| 4.920209311  | 2.292829276  | -1.27177991  |
| 0.32267851   | -0.961134927 | -0.768765279 |
| -0.894611517 | -1.182140071 | -0.263206852 |
| 0.101482958  | 0.475328788  | -1.12524882  |
| -0.570724995 | -0.866322383 | -0.006749692 |
| -1.993510074 | -0.262646435 | 0.39725374   |
| 0.945290742  | -0.05996807  | 0.461804543  |
| -0.560107971 | -0.36353707  | -1.657292867 |
| 0.6118061    | -1.210700345 | 1.02859089   |
| -1.842288487 | 4.030536426  | 2.077285076  |
| -1.159557898 | 0.626323792  | 0.132421461  |
| -1.180788032 | -1.535927812 | -0.713270186 |
| -1.724348994 | -1.339696309 | -1.23206728  |
| -1.706509194 | -1.774663098 | -1.436484275 |
| -0.672952606 | 3.808520776  | 2.318523845  |
| 1.157121939  | 1.450728256  | 2.055296226  |

|              |              |              |
|--------------|--------------|--------------|
| 2.380635409  | 0.239550897  | 0.569890304  |
| -1.554139012 | -0.341091592 | 3.290557376  |
| -0.833936252 | 0.902920731  | -0.652837726 |
| -0.56233922  | -0.042218189 | -0.474702426 |
| 0.786041963  | -0.852291417 | -1.120982272 |
| 2.141333134  | 0.277660626  | 3.470969145  |
| -0.702957244 | 0.604933435  | 0.565803841  |
| -1.506032319 | -0.913303304 | -1.68467574  |
| 0.721116594  | -1.630628872 | 0.374972192  |
| -0.020595207 | -1.363320997 | -0.002949442 |
| -0.403146956 | 1.020701328  | 3.005009401  |
| -0.051898307 | 0.319409806  | 0.458726467  |
| 3.986912591  | 3.331771353  | 0.794763803  |
| 2.500207462  | 0.90399589   | 0.636369863  |
| -0.829331449 | 1.426093528  | -0.983493207 |
| 0.474877048  | 3.345776244  | 4.843550341  |
| -1.372916939 | -1.262958631 | -0.836859875 |
| 0.860383268  | 3.912276994  | 3.742426495  |
| -0.030689274 | 1.380836966  | 0.620670543  |
| 0.919264737  | -0.28752202  | 1.407396727  |
| -1.433572751 | -0.465472754 | 0.668203924  |
| -1.224243893 | 0.170142913  | -0.816635169 |
| -0.930857473 | 0.896057719  | 2.176573823  |
| -0.919362231 | -1.327602594 | -0.886262658 |
| -0.993104807 | -0.057042409 | -0.077323444 |
| -0.087076933 | -0.932064231 | -1.283978757 |
| 2.955721119  | -0.566353676 | 1.092638808  |
| 1.939335433  | -1.689985915 | 0.832858471  |
| 0.221269737  | 0.13882478   | 1.492569662  |
| -0.055200166 | -0.404265063 | -1.433542508 |
| -1.607257237 | -1.869575914 | -1.565084661 |
| -1.557340913 | -1.733623337 | -1.511945873 |
| -1.868095787 | -1.633572592 | -1.642382979 |
| 1.672410852  | 0.149435437  | -1.28190689  |
| -0.017268953 | 0.34107604   | 0.125499332  |
| -1.86270635  | -1.612612397 | -1.49478793  |
| -0.392734296 | -0.503991017 | -1.210008568 |
| -2.101885294 | 2.556279418  | 2.019193743  |
| 1.624863482  | 0.783547322  | 0.067525001  |
| -0.352476505 | -0.671632423 | -0.219433741 |
| -1.56181155  | -1.812594014 | -1.545655403 |
| 0.462218793  | -0.670871801 | 1.465194755  |
| 2.967016656  | 1.637539737  | -0.939305865 |
| 1.880080097  | 1.190886869  | -0.335087431 |
| 1.441122304  | 1.415690771  | 1.891769932  |
| -1.168086996 | -0.65032938  | -1.134861367 |

|              |              |              |
|--------------|--------------|--------------|
| -1.505935387 | -1.212959159 | 0.023114713  |
| 3.31381381   | -1.474126624 | 1.871468078  |
| 1.165433439  | 1.160292017  | 0.570400681  |
| 1.914295379  | 3.143849915  | 1.884224706  |
| 2.217565771  | 2.830113757  | 3.391194734  |
| -0.96004762  | -1.387733714 | -0.564750097 |
| 3.012411791  | -0.239272252 | 1.003189544  |
| -0.421570122 | 0.721492952  | 1.998190557  |
| 1.273490818  | 0.110363218  | -1.09427096  |
| 2.523431744  | 0.829284961  | 1.866316254  |
| -1.133947646 | 0.760279983  | 3.579771506  |
| 1.810852394  | -0.667097586 | -0.255716542 |
| -0.78861109  | -1.657594889 | -1.210838534 |
| 0.283021176  | -1.670072519 | -0.121739098 |
| 8.654634762  | 5.523830046  | 5.428704284  |
| 1.562526193  | 1.53253366   | 3.662534923  |
| -1.756587595 | 0.259754442  | 0.23133286   |
| -0.385990807 | -0.987656891 | -0.706497498 |
| 0.224041746  | -0.185933639 | -2.023935568 |
| 0.825163035  | -1.46757717  | -1.171065264 |
| 0.102340272  | -1.069219643 | -0.288570249 |
| -1.391619453 | 5.205882549  | 4.346160033  |
| 0.547527637  | -1.997606311 | -0.476677998 |
| -0.968874478 | 0.677101435  | -0.907355571 |
| -0.248414897 | 0.398734217  | -0.764370708 |
| 2.611166811  | 3.304088115  | -1.914662643 |
| -0.924789659 | 1.014026247  | -1.222097174 |
| -0.712449317 | -0.103056121 | -0.508779757 |
| -0.950596559 | -0.635719231 | -0.837963076 |
| 0.681730813  | 1.15084276   | -0.622035692 |
| -0.964890982 | -1.211097938 | -1.228173471 |
| 0.029571057  | -1.026537473 | -0.324124487 |
| -1.560362718 | -0.768255003 | -0.183899419 |
| -0.2655686   | -1.505292474 | -1.507157817 |
| -1.476397549 | -0.869145788 | 0.560746016  |
| 0.238974673  | -0.446228246 | 4.02710058   |
| -1.194350083 | 2.467533588  | 1.776258169  |
| 1.991631964  | 1.315519086  | 2.58215079   |
| 1.823616384  | 0.952323345  | 0.419875592  |
| 0.242518292  | -0.042866858 | -1.106001139 |
| -1.684894634 | 1.404247325  | -0.8536327   |
| 2.729090093  | -0.40666477  | 1.866654912  |
| -1.46673755  | -1.81772186  | -1.297298233 |
| 1.014235905  | -1.521740033 | 1.235923227  |
| 1.161845859  | 0.060583135  | -1.055636779 |
| -1.486361968 | -1.825510812 | -1.497263963 |

|              |              |              |
|--------------|--------------|--------------|
| 0.125152456  | 0.074242403  | -1.886404664 |
| 1.113603583  | -1.115873979 | -1.163535978 |
| 0.024455792  | -1.265037709 | -1.098694405 |
| 0.817914193  | -0.676669878 | -0.961605546 |
| 0.04924154   | -1.294149061 | 0.207463564  |
| -0.660252488 | -1.261239221 | -1.339427574 |
| 2.319985072  | 0.498651026  | -1.139745231 |
| 1.632603769  | -0.628338822 | -1.561539169 |
| -1.91887903  | -1.136507944 | -1.278773704 |
| -1.507443806 | -1.493125545 | -0.537192745 |
| 7.865812054  | -1.445365392 | -1.718225768 |
| 0.816018937  | -0.275488668 | 1.848890176  |
| -0.594968325 | 0.136292413  | 0.99890566   |
| -1.198012043 | -0.298138185 | -0.878459864 |
| -0.282325311 | -1.749113156 | -0.65034118  |
| 2.696249387  | 5.240987004  | -1.229273714 |
| -2.078854688 | 0.54740769   | 0.10129598   |
| -0.636034693 | 2.371571009  | 1.849328182  |
| -0.702474242 | -1.064803565 | -2.106063973 |
| 0.92487331   | -1.668556201 | -1.076888586 |
| 2.408496017  | -0.704236814 | -0.252129544 |
| 4.765977834  | 0.818948046  | 0.39162554   |
| -1.489557867 | -1.599830875 | -1.351061482 |
| -1.356167142 | -1.982161023 | -1.178172551 |
| -1.517686649 | -1.804878554 | -1.821995266 |
| 0.135151927  | 0.320409834  | -1.601637392 |
| -0.794845556 | 0.039504143  | -0.41682932  |
| -1.948734106 | 0.303789339  | 0.851713389  |
| 4.511973325  | 0.20702932   | -1.916177062 |
| -0.272865479 | -1.153591135 | 0.33144865   |
| 0.111015716  | -1.733318188 | -0.041793324 |
| -0.252400932 | -1.69538795  | 0.152509054  |
| 0.233045072  | 0.840158166  | -0.006217544 |
| -1.047874917 | 0.294418881  | 1.667424075  |
| 2.377143827  | 2.096940127  | 0.916291795  |
| -0.900248353 | -1.330113396 | 0.435763095  |
| 1.154145916  | 1.808496754  | 0.52650995   |
| -1.754678736 | -0.408409908 | -0.563960126 |
| -0.025599072 | 0.368360753  | -0.761112707 |
| 0.40728049   | -1.99275427  | -0.929081342 |
| -0.043900187 | -0.784170324 | 1.10379653   |
| 0.611492562  | -1.093725573 | 1.008932802  |
| 3.904239333  | -1.507829934 | -0.5416698   |
| -0.160224302 | -1.045515757 | -1.177818057 |
| 0.656541723  | -0.314163295 | 0.10802255   |
| 0.713929484  | 0.464593855  | -0.164800478 |

|              |              |              |
|--------------|--------------|--------------|
| 1.671691608  | 1.715946267  | 0.596306605  |
| -0.374795275 | -0.147575232 | -1.798881947 |
| 4.07596473   | 4.439345839  | -0.44339149  |
| -0.890738646 | -0.093128035 | -1.686715289 |
| 0.367445031  | -1.097769444 | -0.042976534 |
| -2.045468365 | -0.938619627 | -1.76808562  |
| -0.148225191 | -0.325133778 | -0.522018588 |
| 0.219449297  | 0.692626454  | 0.336140882  |
| -0.73563248  | 0.229236299  | -1.608292914 |
| -1.408006567 | -1.437915356 | -0.574451416 |
| 1.086657821  | -0.398313719 | -1.625308927 |
| -1.194965964 | -0.545676751 | -1.07539398  |
| 0.875104569  | -1.440377295 | 3.087863962  |
| 1.27749706   | -2.165000582 | 4.828796444  |
| -1.927345495 | -1.959960154 | -1.567158427 |
| -1.907939266 | 0.721397425  | 0.955987767  |
| -1.001907831 | 0.761168385  | 0.734101468  |
| -1.662798732 | 0.303428649  | -0.494584695 |
| 1.309460695  | -1.769598679 | 1.896490422  |
| 4.051476641  | -0.15109839  | 4.08789974   |
| 7.841731239  | -1.759680943 | -0.169880009 |
| -0.802224882 | 0.650263997  | -0.950734314 |
| -0.054701018 | -0.296628233 | -1.124261755 |
| -2.128965897 | -0.749958415 | 1.12993963   |
| -1.992630258 | -0.655287    | -1.673932799 |
| -1.542665438 | -0.170730156 | 0.002392327  |
| -0.117553615 | 2.648136457  | -2.114480885 |
| 3.156316808  | 3.029591102  | -1.554764713 |
| -0.526565082 | -0.689859777 | -0.257211225 |
| 1.742342779  | -1.884032069 | 0.558592945  |
| -1.547077635 | -1.597433817 | -1.789005648 |
| -1.030103862 | 0.931219381  | -1.214091472 |
| 0.187096943  | 0.470197726  | -1.213590826 |
| -1.26479314  | 0.429744691  | -0.517719381 |
| -1.707508969 | -0.042938883 | -1.906372978 |
| -1.226885408 | -1.18607251  | -1.748346217 |
| -0.618890422 | 0.499724535  | -1.212804392 |
| -0.960321762 | -1.096168315 | -0.322988511 |
| 1.122784893  | -0.918161004 | -1.311757333 |
| 0.702495918  | 0.533474488  | 0.908184648  |
| 0.560003396  | 8.224842197  | 7.783977744  |
| 1.476856964  | -1.044867634 | -0.344554416 |
| -1.179063462 | -0.482167834 | -0.482109745 |
| -1.431246081 | -1.363901258 | -0.638242345 |
| 7.94279861   | 5.198674352  | -1.242181539 |
| 1.520203803  | -0.258243342 | 1.188838754  |

|              |              |              |
|--------------|--------------|--------------|
| 0.621231888  | -2.06686938  | 0.526285153  |
| -0.611178778 | -1.835887891 | -0.548588652 |
| 1.766756267  | 1.759652456  | 2.134985523  |
| 1.243020845  | 0.040529297  | -1.231562204 |
| -0.356470446 | 0.562497672  | -1.765298798 |
| -1.367392207 | -1.311544253 | -0.288194398 |
| -1.988208713 | 0.413280378  | -0.805714392 |
| 0.242052718  | -1.802085987 | -0.600861626 |
| -1.710651447 | 2.200071712  | 2.636013932  |
| -1.853219561 | 1.751756612  | -1.119960084 |
| 0.866229204  | 6.646448195  | 8.56867858   |
| -0.747329399 | 0.3344054    | 0.975347665  |
| -0.502103851 | -1.482735406 | -0.813635308 |
| 1.058248136  | 0.100732874  | -0.038259699 |
| -0.477298503 | -0.462900703 | -1.009585351 |
| -1.672005449 | 2.97416794   | 4.16811418   |
| 0.239578992  | -0.765342084 | 0.14848298   |
| -0.330348382 | 1.050730387  | -0.026589162 |
| -0.852983648 | 1.060186427  | 0.850974937  |
| -0.93756757  | 5.315966185  | 3.97939993   |
| -0.565510468 | 2.819688215  | 2.163299302  |
| -1.48260162  | 2.985202184  | 3.962803968  |
| 0.907931578  | 1.003587171  | -0.042709028 |
| -1.170198041 | -1.053033282 | -2.080457588 |
| -1.436972823 | -1.56670812  | -1.19682816  |
| -2.033528925 | -0.792394946 | -2.06235593  |
| 1.961532955  | 0.787406945  | 0.104402331  |
| -1.416235794 | -1.216256535 | -1.084493908 |
| 4.148394184  | 2.04027153   | -1.627195777 |
| -1.6895765   | -1.810534047 | -0.162794883 |
| -0.82917315  | -0.710560254 | 0.743492785  |
| -0.792361359 | -0.059606281 | -0.697311682 |
| 0.996331726  | -1.797881674 | -1.697832387 |
| -1.014964392 | -1.299059276 | -1.918662364 |
| 0.03976852   | 0.013160389  | -1.829345167 |
| -1.830091351 | 0.500949859  | 0.925825482  |
| 3.38135747   | 3.047350876  | -1.63749552  |
| -0.621622372 | -0.260819084 | -0.198066319 |
| 0.73172481   | 0.56765226   | 0.082033658  |
| 0.381764463  | -0.93910721  | -1.20667297  |
| 0.563353027  | -1.099169456 | 1.110107633  |
| -0.003705414 | -0.210559497 | -0.788274389 |
| -1.471474712 | -2.123693027 | -1.631351549 |
| 1.26959585   | 1.404345769  | 0.952895857  |
| -1.803675398 | -2.221892197 | -1.692825791 |
| -0.415726863 | 0.927323045  | 1.808992136  |

|              |              |              |
|--------------|--------------|--------------|
| -0.83603204  | 0.0510724    | 0.602119029  |
| -1.63081436  | 1.100414192  | -1.974556098 |
| -0.483525505 | -0.78465635  | -1.005796063 |
| -1.670052909 | 1.076708374  | 0.861641656  |
| -1.987407768 | -1.404931996 | -1.657489133 |
| -0.813272593 | 1.709657313  | 0.753367022  |
| 1.762617964  | -0.857752729 | -0.514859563 |
| -1.384080756 | -1.963631924 | -1.599342054 |
| 2.49527021   | 2.146052273  | 2.276782477  |
| -2.362367614 | -1.222277627 | -0.007567322 |
| -0.25427999  | -1.751804989 | 0.073208527  |
| 1.773255133  | 2.262601611  | 1.588912155  |
| 0.93136112   | 1.233227644  | 0.47538092   |
| -1.380152689 | -1.117687852 | -1.762362075 |
| 0.66869984   | -1.921282696 | -0.327123152 |
| 0.903722256  | 0.620555885  | 1.127867531  |
| -1.988576105 | 0.650855187  | 3.296244142  |
| -1.379419065 | 0.819917371  | -1.437937188 |
| -1.905149373 | -1.126760141 | 2.62063126   |
| 0.597061281  | -0.609290882 | 3.021323536  |
| -0.983490314 | 1.226299091  | 0.380879935  |
| -1.447609872 | -2.171807905 | -1.744864775 |
| 2.333085968  | -1.749712053 | 1.827402163  |
| -0.461406993 | -1.028129887 | 0.202254288  |
| -1.258636257 | -1.158108348 | -1.54537514  |
| 0.563036125  | -1.631370936 | -0.293874195 |
| 0.722006449  | -1.099331364 | -0.280309107 |
| 1.723919214  | -0.321071256 | -0.271256342 |
| -1.759846286 | 3.718495506  | 4.346664257  |
| 0.143576758  | -1.91375481  | -0.833352833 |
| -0.575278347 | -0.159685668 | 0.205924095  |
| 0.826937205  | -0.333425343 | -1.8314119   |
| -0.818898461 | 1.331001935  | 0.694868851  |
| 0.420810366  | 0.049571902  | -0.14337085  |
| -0.097434433 | -1.00153457  | 0.413938753  |
| 1.086015     | -0.615677069 | -1.776691277 |
| 1.424615423  | -2.019931742 | -1.514283494 |
| -1.367914733 | 0.374035854  | -0.827360588 |
| 4.208835368  | -2.290381088 | 5.147681972  |
| 7.123133171  | -1.956845903 | 3.262664875  |
| -1.658298265 | -1.963167809 | -1.56741435  |
| 4.966675399  | -0.85445998  | -0.699244004 |
| 0.84157425   | 0.365354614  | -1.83998907  |
| 3.738514232  | 2.8618389    | -1.816381225 |
| -0.73177394  | -1.67819805  | 5.598387878  |
| -0.734473597 | 0.57063841   | 0.01340467   |



|              |              |              |
|--------------|--------------|--------------|
| -1.781786543 | -2.165485824 | -1.378011781 |
| -1.964603914 | 2.472091172  | -0.610291875 |
| -1.493779223 | 3.927497713  | 3.579349048  |
| -1.988243353 | -1.973118872 | -1.814521804 |
| -0.387544764 | -0.572331474 | -0.051601773 |
| 4.057054359  | 4.789540707  | -1.997193504 |
| 1.570529014  | -0.309943607 | -0.448645561 |
| -1.435092469 | -1.363992655 | -1.85827327  |
| -1.888332916 | 0.480737213  | 1.677665136  |
| -0.607682852 | -1.110051571 | -1.191059017 |
| 0.182631812  | -0.091950795 | -0.999338681 |
| -1.984557003 | 6.812518704  | 4.300986886  |
| 0.542595259  | -1.804644484 | 0.077441395  |
| -0.141320677 | -1.881075153 | -1.319289492 |
| 3.343716148  | 1.94541698   | 0.793289255  |
| -1.438064467 | -1.518114147 | 1.582329839  |
| -1.946147776 | -2.193221117 | -1.836394676 |
| 1.349504395  | 4.689743472  | 0.483975467  |
| 1.706849258  | 1.908532235  | -0.612349977 |
| -0.614968895 | -1.039527224 | -1.390583168 |
| 0.252706196  | -0.901348732 | -0.014858886 |
| 1.344413585  | -0.227063392 | 0.50864626   |
| 8.381484545  | 1.80063905   | -1.077212026 |
| -2.017632428 | -2.046324443 | -1.767246479 |
| -2.237568898 | 0.310060265  | -0.264760866 |
| -0.321731472 | -2.192613045 | -1.570267398 |
| -1.301273049 | -0.833389722 | -0.850211924 |
| -1.750781722 | -0.169468027 | -1.537427347 |
| 1.173210026  | -1.094938766 | 0.798855541  |
| -1.400268862 | 1.942467985  | 1.658016278  |
| 0.130939376  | 0.061864742  | -0.010572175 |
| 2.202417895  | 2.913843651  | -1.024287866 |
| -0.29418369  | 0.425044626  | -1.776451048 |
| 5.385950041  | 0.529366121  | 0.614382264  |
| -1.470624807 | -0.879438344 | -1.948962008 |
| -1.763938634 | -0.932981493 | 0.059370244  |
| -1.761295962 | -1.83130809  | -0.944731727 |
| -0.79232541  | -0.466957627 | -0.383347608 |
| -0.09509516  | 1.562103988  | -1.118516244 |
| -1.038707434 | -0.346394254 | 1.699985844  |
| -0.842191794 | -0.019455504 | 0.351760422  |
| -2.085039041 | 0.599056103  | 0.508271967  |
| 5.315371822  | 4.251291911  | 2.842567237  |
| -1.33612977  | 1.237860771  | -1.312267131 |
| -1.555148083 | -0.78476767  | 0.662376684  |
| 1.114466992  | 0.386019258  | -2.108398176 |

|              |              |              |
|--------------|--------------|--------------|
| -1.876740401 | -2.043926855 | -1.725658929 |
| 1.53830914   | 1.481010773  | -2.315052547 |
| 1.211495807  | -0.592992619 | -1.44221821  |
| -1.965033386 | 3.930512212  | 3.906541606  |
| -0.388760183 | 0.192478004  | 1.177708115  |
| 0.082842004  | 0.788313767  | -0.47533742  |
| -1.910492301 | -0.751459861 | -0.938159673 |
| -0.590631484 | -1.071534961 | 2.437342984  |
| -2.049473641 | 0.317146025  | -0.027562031 |
| 6.482235861  | -0.960360611 | -0.793549171 |
| -0.420252725 | 0.846484358  | -1.888142259 |
| -1.359438871 | -1.183766672 | -1.959442265 |
| 0.318006114  | -0.518165363 | -1.071179036 |
| 3.812754282  | -1.87524359  | 1.164074021  |
| 2.458897985  | 3.043234303  | 1.031709331  |
| -2.126546841 | 1.720260685  | 0.66841904   |
| -1.43966798  | -1.327661429 | -1.327828058 |
| 0.247945747  | 0.954650563  | -1.13373431  |
| -0.767395581 | -1.500953818 | -0.522441471 |
| -1.685330165 | -1.745846377 | -1.332929682 |
| 0.907076005  | -1.19481271  | -0.687995032 |
| 0.174480905  | 0.229226265  | -1.995580046 |
| 1.772121728  | 0.144059763  | -1.889845084 |
| -1.330075033 | -1.559293745 | -1.48285594  |
| -0.879374942 | -1.086104865 | -1.308997493 |
| -1.997412743 | -2.084380733 | -0.84737995  |
| 5.606059121  | 4.601706681  | 0.446232992  |
| -1.127976683 | 0.928696825  | -1.520758965 |
| 0.664590277  | -0.088201806 | -0.942275427 |
| -1.76438166  | 1.277081397  | 0.225937927  |
| 1.738196583  | 0.368815725  | -0.093615645 |
| 2.186563933  | 1.469933103  | 2.260502613  |
| -2.209629181 | 0.805971449  | -0.444475304 |
| 3.258176741  | 4.875403465  | 1.893284774  |
| 2.495733571  | 0.21353229   | -2.43752936  |
| -1.412981635 | -1.760269791 | -2.349172896 |
| -1.548391713 | -1.376745958 | 0.14440042   |
| 0.403780864  | -1.650591174 | -0.376920968 |
| -1.996039441 | 0.599717423  | 2.491692034  |
| -0.940322289 | -1.236897124 | -1.90325371  |
| 0.074753828  | 0.219591022  | -1.323536487 |
| -2.163882987 | -1.921143814 | -1.518319511 |
| -1.681695418 | 3.753300474  | 1.974543553  |
| 3.266468701  | 2.540796269  | 3.08457962   |
| -0.79337501  | -0.156939117 | 0.01035887   |
| 4.8968249    | 1.805234537  | 0.25136129   |

|              |              |              |
|--------------|--------------|--------------|
| -2.224436585 | -1.764387462 | -1.536116437 |
| 4.221418471  | 3.273152935  | 3.166689425  |
| 0.558443185  | -1.353441607 | 0.340336102  |
| -1.815837032 | 0.420667107  | 0.128523314  |
| -1.842006268 | -0.843821976 | -0.343933285 |
| -2.323802438 | -0.652420796 | -0.881245583 |
| 0.129622304  | 2.555734052  | 5.365836512  |
| -1.963094834 | -2.210182202 | -2.063740577 |
| 0.47879809   | 0.374268741  | -0.419810362 |
| -2.084758217 | -2.349140177 | -1.477144543 |
| 1.879465763  | 1.719054992  | -1.525078934 |
| -0.330614231 | -1.693670757 | -0.202101419 |
| -1.883912498 | -1.048690835 | -0.037366299 |
| -1.335574638 | -1.078660162 | -1.347086765 |
| -2.05596444  | 0.640239881  | -0.580159659 |
| -0.01594523  | -0.540504272 | -1.089770184 |
| 0.215064209  | -1.624474432 | -0.476946926 |
| 0.436379092  | 6.23354501   | 4.311984705  |
| -1.168448837 | -0.497973089 | -1.149022073 |
| 0.023070546  | -2.160790184 | -0.277279297 |
| -2.194587985 | 4.681695829  | 4.07481628   |
| 1.464714053  | -1.835743673 | 2.324773658  |
| -0.37517114  | -1.3183653   | 2.186845651  |
| -1.952197206 | -1.518217587 | -2.464085273 |
| 6.295217327  | 0.525095274  | -2.124499617 |
| -0.263561239 | -0.669902387 | -0.650714979 |
| 0.151768371  | -1.31815942  | -0.589390285 |
| -0.278411191 | 0.707070424  | -0.347596452 |
| -0.739361185 | -0.543673318 | -2.397553009 |
| 1.357924838  | 3.365596129  | 2.022915096  |
| 2.481005138  | 2.379815153  | -2.409544743 |
| -1.173856446 | -1.337285081 | -1.314740101 |
| 1.834302815  | 0.621363534  | -2.029886481 |
| -1.91410606  | -2.220740403 | -1.824765614 |
| -0.42002353  | -1.571168922 | -1.646207099 |
| 0.737933796  | -0.613556291 | 0.203374652  |
| -0.120996512 | 0.800306472  | 0.720813374  |
| -1.259547541 | -0.191675649 | -0.236494107 |
| -1.415472377 | -1.465250652 | -1.44194582  |
| 1.772015239  | -2.118440912 | -1.425085764 |
| -1.726040098 | -0.37126452  | -0.911406486 |
| 1.161051418  | 0.693790237  | -1.36316312  |
| -0.424501965 | 1.155142886  | 0.191323325  |
| -1.776247741 | 0.544851896  | -0.776650173 |
| 2.528457309  | 0.352316522  | 0.671715184  |
| 1.751866319  | 1.01923814   | 3.523921848  |

|              |              |              |
|--------------|--------------|--------------|
| 1.495550825  | 1.987500616  | -0.44802481  |
| -0.761380178 | -1.298652981 | -0.942095369 |
| -1.044048127 | -1.111929672 | -1.003729697 |
| -1.972903257 | -2.254285197 | -2.150743111 |
| 0.047808868  | -1.302491921 | 1.146533074  |
| -0.210179812 | -0.375553244 | -2.424234487 |
| 4.444754653  | 2.454884439  | 1.531123381  |
| -0.544857349 | -1.275077291 | -0.534039538 |
| 0.15334149   | -2.179665498 | -0.264876734 |
| 3.452318005  | -1.991522362 | -0.279881599 |
| -0.038130792 | -0.45260032  | -0.232940598 |
| -2.440377377 | -1.341706114 | 2.617724151  |
| 0.333140293  | -2.253947333 | -0.189881507 |
| 7.985692643  | 0.423835563  | -2.174780711 |
| -1.688343285 | -1.324177897 | -1.463861679 |
| 0.367296992  | -0.054098186 | -0.387475731 |
| 2.311631858  | -0.204568621 | -2.113536419 |
| -1.124181681 | -1.63959007  | -1.985731213 |
| -1.103121528 | -1.271422802 | -0.865389664 |
| -1.072129853 | -2.302331702 | -0.363558982 |
| -1.641667555 | -1.97812574  | -1.837792309 |
| 2.435715053  | 1.615753838  | 2.132511204  |
| -0.060414206 | -0.701857809 | -1.066857141 |
| 5.598478061  | -1.554816126 | 4.101401026  |
| -1.448838974 | -1.317814444 | 0.827944382  |
| 2.765515144  | 1.375642312  | -1.525492472 |
| 2.019718975  | 1.387927337  | 0.478559259  |
| -0.644844254 | 2.102227002  | -1.693871796 |
| -0.183426112 | -0.143384908 | -1.28446869  |
| -0.047300284 | -2.051806704 | 0.238210414  |
| -1.431390059 | -2.11837449  | -2.264360226 |
| 0.997006526  | -2.34419593  | -1.081781118 |
| -1.927167205 | -0.980340223 | -1.637697368 |
| -1.914996373 | -2.133850882 | -1.688410138 |
| 0.517711283  | -0.022637553 | -1.733487871 |
| -1.906390649 | -1.437401992 | -1.10036197  |
| -1.660158442 | -0.110142121 | 1.112824456  |
| -1.63118369  | 1.130559987  | -0.426720198 |
| 2.233212513  | -1.276337473 | -2.149356064 |
| 0.446866803  | -0.678261116 | 1.436411335  |
| -1.44714902  | -0.602680327 | -0.116311505 |
| -0.25436264  | -1.080084734 | -1.323001789 |
| -1.816487764 | -0.887319958 | -1.144424664 |
| -0.363313343 | -2.08751317  | 1.348745096  |
| -0.489400076 | -1.970969771 | 1.404146438  |
| -0.931920644 | -1.848643227 | -0.325597949 |

|              |              |              |
|--------------|--------------|--------------|
| -1.322507902 | 1.214854653  | 2.055364266  |
| 0.824521365  | -0.19507474  | -0.069692682 |
| -2.089458268 | -2.106222241 | -1.313261871 |
| -2.546193698 | 0.832631924  | -0.15214344  |
| -0.175550906 | -0.747074706 | -0.993985972 |
| 0.778382957  | 0.123647482  | -1.833593598 |
| -1.513781414 | -1.19431897  | -1.716522268 |
| -1.575591645 | -2.313711332 | -0.759903843 |
| -1.007221355 | 2.252398758  | 4.13836653   |
| -2.402494467 | -1.972744168 | -1.276253619 |
| -2.094953575 | -1.150230595 | -1.111139831 |
| -1.905504913 | -1.153276733 | 1.684583946  |
| 1.187375806  | 1.601584435  | 1.437715173  |
| -1.483317272 | -1.928537559 | -1.708030168 |
| -2.467674398 | -2.166661901 | 2.688041127  |
| -0.644251542 | -0.588110831 | -0.682598711 |
| 3.170977755  | 0.323414588  | -1.071066822 |
| -1.177475806 | -2.413684889 | -1.768864194 |
| 5.155956859  | -1.903441003 | 4.49692472   |
| -1.406399188 | 1.13449481   | 0.574747155  |
| -1.361051821 | 0.061581433  | 0.018730172  |
| -1.86370229  | 1.201618275  | 0.709322263  |
| 1.531112131  | 0.692192708  | 1.314035071  |
| -0.31105239  | 0.479677571  | -1.610927112 |
| -2.389845399 | 0.039873516  | -1.562988597 |
| -0.32130603  | -0.095829692 | 0.045278889  |
| 1.28606072   | -2.159144424 | -1.167478998 |
| -0.553145748 | 0.860542194  | 1.463706977  |
| 0.077164082  | 2.322312834  | -0.081757466 |
| -0.462505509 | -1.599014698 | 4.264946613  |
| -1.807265425 | -2.027926694 | -1.516066653 |
| 0.059754841  | -1.924712242 | 2.037240128  |
| -1.717844453 | -1.86136617  | -1.651496802 |
| 6.375056149  | -1.623272047 | 6.63263169   |
| -1.340957104 | -0.86984821  | -0.847281234 |
| -0.103047681 | 1.141257527  | -0.459691611 |
| 1.973010327  | -0.926259802 | 1.116640384  |
| 1.225690541  | -1.126826213 | -2.046588466 |
| -0.199342565 | -2.010438754 | -1.620080326 |
| 1.463869122  | 0.04576875   | -1.929898499 |
| -2.420336174 | 2.20312912   | -0.226412987 |
| -2.110267711 | 1.154769538  | 0.119118075  |
| 4.631363904  | 3.580274425  | -2.141752336 |
| 5.868396737  | 5.422703802  | -1.781855723 |
| -1.682550836 | -0.874778803 | -0.991541462 |
| 0.105180068  | -0.953669716 | -0.184648992 |

|              |              |              |
|--------------|--------------|--------------|
| 3.525604076  | 2.590893149  | 2.493110755  |
| -0.43389325  | 1.284878123  | 1.399520323  |
| -1.621254541 | -0.718835477 | -1.787918413 |
| -1.730321986 | -1.990765993 | -1.888097557 |
| -2.123808735 | 0.696038187  | 0.297567607  |
| -1.730233094 | -0.018346531 | -2.121899396 |
| -0.942157461 | -0.468942338 | -1.425728675 |
| 0.234313167  | -0.849548165 | 0.396888667  |
| 1.143165303  | 3.898371149  | 3.873312581  |
| 4.27812867   | 5.227800021  | 6.039944097  |
| -1.68263558  | -1.334317225 | -0.457521814 |
| 2.449552915  | -2.355650538 | 5.703833014  |
| -1.724507648 | -2.248198248 | -1.537383863 |
| -0.957559384 | -2.440026702 | -1.691419554 |
| 3.885322446  | 0.98812126   | 3.435839929  |
| -0.940368786 | 0.865986996  | -1.196477101 |
| -0.593780255 | -1.456339876 | -1.412861066 |
| -1.254871509 | -2.001155375 | -1.072346882 |
| -2.477543074 | 0.016597899  | -0.963432256 |
| 0.913253025  | -0.608554609 | 0.798550103  |
| -0.885349463 | 1.01371858   | -1.95668898  |
| -1.450374665 | 0.135061579  | -0.186230339 |
| -0.398040268 | 1.508562789  | 0.732897323  |
| 3.58540437   | 0.932836535  | 1.311076852  |
| -1.111562084 | -0.501654481 | -2.351721838 |
| -2.539986479 | -1.314324965 | 4.282322293  |
| -0.661611881 | -1.851825001 | -1.101991581 |
| -0.363362958 | -0.635704305 | -1.41352956  |
| 0.855797317  | -1.410962647 | -1.275384227 |
| 0.403706274  | 0.6442543    | -2.350993314 |
| 0.928654733  | -0.374925989 | -1.776523407 |
| 0.389925726  | 0.234145855  | 0.548830749  |
| 0.141773007  | -1.028704921 | -1.167781083 |
| -0.816436456 | -1.601990514 | -1.231265117 |
| -2.487454391 | 2.204844083  | 3.466675069  |
| 3.231153822  | 0.485650551  | -2.315722009 |
| -1.833545446 | -1.079697758 | -0.800287918 |
| -1.893159407 | 3.195380182  | 4.016160472  |
| -0.969997185 | 0.453496604  | -2.676502267 |
| -0.795402279 | -0.556884387 | -0.894842295 |
| -0.550538285 | -1.359850426 | -1.080507159 |
| -1.63343212  | -0.204900401 | -0.866587728 |
| 0.656508827  | -0.671617224 | -0.69992028  |
| -1.924488431 | -0.22762292  | -1.504560435 |
| -2.305928261 | 1.300775622  | 1.713925645  |
| -1.855108872 | -2.478978704 | -2.115809168 |

|              |              |              |
|--------------|--------------|--------------|
| -0.060062534 | 1.223970514  | 4.788508381  |
| 2.51099014   | 1.688695917  | -1.920599368 |
| 3.409718249  | 0.388295987  | -2.637099755 |
| -0.560863884 | -1.730859063 | -1.19487586  |
| -1.98914979  | 3.420368972  | 1.377014138  |
| -1.182276885 | -1.353654519 | -1.886412236 |
| -1.730227596 | 2.612646279  | 6.421769967  |
| -0.477821167 | -1.73845842  | -0.350207555 |
| -1.633417262 | -2.467233797 | -1.460415106 |
| -0.840997477 | -0.582008416 | -1.879097585 |
| 4.177170143  | -2.239178793 | 1.167044633  |
| 2.992809049  | 1.743877123  | -1.774820163 |
| -1.591322381 | -2.446744663 | -1.647944354 |
| -0.179787925 | 0.043630763  | 0.609617864  |
| 3.596350933  | -1.991387094 | 4.382340704  |
| 0.316042345  | -2.239975376 | 0.520770046  |
| 1.311581756  | -2.297786679 | 0.521706085  |
| 2.252563444  | 3.289178183  | 0.035851177  |
| 1.736494977  | -1.436870617 | 2.37792631   |
| 0.009820581  | 0.673893809  | -0.855726703 |
| -0.186619672 | -2.314281184 | 0.724141937  |
| -1.481702655 | 0.612627782  | -0.706129761 |
| -1.094025744 | -1.906156463 | -1.993199211 |
| -2.45010017  | -0.769872474 | -0.143016601 |
| 0.300707063  | -1.83165976  | -1.457592524 |
| 1.40246988   | -0.89452491  | -2.227288694 |
| -2.151435265 | -1.321592865 | 0.760554827  |
| 0.349337185  | -1.280593585 | 0.97730811   |
| -0.933138949 | 2.881474949  | 2.318687748  |
| -2.342924222 | 0.157724727  | -2.111989665 |
| -2.086493714 | -1.182528316 | -0.195524805 |
| 3.78271693   | 1.224865044  | 1.268351839  |
| -1.274998718 | -0.789504158 | -2.251456353 |
| -0.119446933 | -0.555716885 | -1.359887104 |
| 1.151034895  | -1.118246493 | 0.225708836  |
| -0.418119167 | -0.342585523 | -0.365398414 |
| 4.168011345  | -2.124357187 | 0.829919978  |
| -1.56774272  | -1.773369222 | -1.799375735 |
| 5.131672015  | 4.870841998  | -2.075248204 |
| -1.661923727 | -2.229448183 | 0.915156557  |
| 0.096765323  | 0.364003746  | -0.05516724  |
| 0.070826154  | -1.517514874 | -0.939252924 |
| -2.341920417 | -1.622624132 | -2.676837509 |
| -2.626732356 | -0.599847476 | 0.119752367  |
| -1.445903697 | -0.824430957 | -1.049239411 |
| -0.289721165 | -0.787923377 | 0.39590311   |

|              |              |              |
|--------------|--------------|--------------|
| -1.772834021 | -2.13261019  | -1.68318059  |
| 1.258558187  | -1.67099414  | 0.4433734    |
| -2.109887378 | 0.16285735   | -1.292538584 |
| 4.209683638  | 1.320167397  | -0.221926916 |
| -1.560800279 | -1.022206074 | 0.96382096   |
| 1.412316354  | -1.792243511 | -0.920267973 |
| -0.693529847 | 0.013389358  | 0.08914259   |
| -2.364611792 | 3.892099337  | 3.982203145  |
| 2.28352088   | 2.073993646  | -1.648650103 |
| -2.345716139 | 1.48901869   | 1.070882654  |
| -1.334741728 | 0.085433566  | 0.399831547  |
| 1.904945332  | 0.466558628  | -0.959736067 |
| 1.882261631  | -1.385593339 | 2.07561359   |
| -0.7819416   | -1.094407872 | -0.346566967 |
| -0.598261678 | -1.312876126 | -2.605951822 |
| -1.357047811 | -1.632720533 | -1.448707144 |
| -1.998962478 | -2.128715658 | -1.733203928 |
| -1.937432168 | -1.665575974 | -1.735862789 |
| 0.150853501  | -2.324002657 | 1.720975336  |
| 5.752813166  | -2.262575789 | 0.041176121  |
| -1.593193739 | -1.63083591  | 0.015706364  |
| -1.626931195 | -0.331933233 | 0.675291047  |
| -0.629166737 | -1.403433759 | -2.209553912 |
| 0.326858181  | -0.877740293 | -1.473087339 |
| -0.625375626 | -2.254918094 | -1.871147967 |
| 1.864160155  | -2.188840849 | -0.303101636 |
| -2.592502205 | 3.516271009  | 5.186836533  |
| -1.976028883 | 2.924428604  | 0.751101325  |
| -1.695624278 | -0.192004507 | -1.80972058  |
| -0.51560052  | -1.90443216  | 0.15485891   |
| -1.181188839 | -2.010332131 | -0.994311688 |
| -2.656897799 | 1.994821471  | -0.661587119 |
| -1.110009389 | -1.333404993 | 0.425946733  |
| 1.650809423  | 1.409126986  | -0.759851323 |
| -0.650577549 | -2.572940186 | 4.977435898  |
| -1.406315469 | -0.973615679 | 0.242082395  |
| -2.402432294 | -2.045214493 | -1.62759984  |
| -1.087486212 | 0.036523778  | -0.830650199 |
| -1.005886517 | -1.100618948 | -0.632179272 |
| -0.005910136 | -0.753902744 | -2.084154781 |
| -1.562525043 | 0.970713978  | -0.124855696 |
| -1.294278818 | -2.322358337 | -1.997493376 |
| 1.57110928   | -0.682064689 | -2.694354925 |
| 0.313271513  | 0.058053345  | -2.104516927 |
| -0.240521213 | -2.01134416  | -1.051636926 |
| -2.009506895 | -1.139875797 | 1.581924197  |



|              |              |              |
|--------------|--------------|--------------|
| -0.25243215  | -0.054826307 | -1.592506594 |
| 0.453426508  | -2.083746183 | -1.166558229 |
| 0.233226572  | -2.209646036 | -1.379905328 |
| 0.671976483  | -0.890588745 | -0.655180584 |
| -1.360184876 | 0.994786354  | -0.157885538 |
| -0.66633061  | 0.584616151  | -2.221728959 |
| 1.054022553  | 1.712234114  | -0.374946348 |
| -1.242433535 | -1.095770283 | -1.355614811 |
| -2.255562821 | -1.378277126 | -2.222032517 |
| 0.203891775  | 1.808134094  | -2.586491836 |
| -0.792480965 | -0.664590085 | -1.17628253  |
| -1.200155608 | -1.575276114 | -0.75263174  |
| -2.845893419 | -1.483088028 | -1.843996963 |
| -1.86104348  | -1.722393256 | -2.075262241 |
| -2.722784126 | -1.882353471 | -1.028390218 |
| -2.636631631 | 0.891616063  | 2.048438228  |
| -2.363544402 | 0.115386716  | 0.48357009   |
| 0.080414595  | -1.698938474 | 0.708940061  |
| -1.205744828 | -1.164338114 | -1.646394048 |
| -1.213659396 | 0.802417488  | -0.630613759 |
| -0.118476084 | -0.855413812 | -0.956113536 |
| -1.375293639 | -0.165116203 | 0.077212269  |
| -0.038434422 | -0.684518219 | -1.591308327 |
| 8.220472558  | 3.463556735  | -2.648899475 |
| 6.770259848  | -1.232421621 | 6.481974445  |
| -2.822130996 | -0.028264724 | -0.169558846 |
| 0.584220686  | 0.23377912   | -0.135616105 |
| -0.415815437 | -1.316434447 | -1.733424921 |
| -2.630968784 | 0.549518629  | 0.519214426  |
| -0.783861485 | -1.087089486 | -0.669876284 |
| 4.585253311  | 5.282382406  | -2.546890728 |
| 0.242067392  | 1.689437934  | -2.735488133 |
| -1.980764774 | 5.079020039  | 5.768970145  |
| -2.289422989 | 0.090315149  | 7.205261996  |
| -0.575625747 | -0.239137757 | -0.360758123 |
| 5.821804958  | -1.975001823 | 0.854804231  |
| 2.60619021   | 1.285676654  | -0.287987217 |
| 2.908054672  | -0.57709064  | 4.771642018  |
| -1.80988503  | -2.011498402 | -2.481998974 |
| -0.128212824 | 0.461021403  | -0.713640218 |
| -1.827565761 | 0.372365471  | -1.057970739 |
| -2.308947283 | -2.596617631 | -2.02334562  |
| 0.222024833  | 0.882676791  | -2.098042326 |
| -2.55587581  | -2.518178424 | -1.595871286 |
| -0.438174486 | -0.301219434 | 0.859966359  |
| -2.500967449 | 1.773796988  | -1.183703536 |

|              |              |              |
|--------------|--------------|--------------|
| 1.675690134  | 1.596744745  | 5.444996808  |
| -2.188685125 | 0.544402936  | 0.716359157  |
| 2.506545471  | -1.234419785 | -0.425994157 |
| -0.644470535 | -0.469216597 | 0.028402407  |
| -0.480616178 | -0.036142361 | -0.5845702   |
| -1.404854102 | 11.21122952  | 8.458973881  |
| 3.065997292  | 0.964418181  | 1.706614468  |
| -0.280555309 | 0.490122087  | -1.657822852 |
| -1.430914986 | -0.523664457 | 2.91505598   |
| 0.792899182  | -1.569057188 | -2.550253445 |
| -1.307623095 | -2.65786383  | -1.025571535 |
| -2.140355995 | -0.15315506  | -0.557193246 |
| 0.97546874   | -0.879363049 | -2.650994314 |
| 4.436753562  | 2.661248215  | -0.809571871 |
| -2.039918244 | -1.446933153 | -2.315377847 |
| -0.704441031 | 0.721434533  | 0.873841321  |
| -1.4304329   | -0.768290373 | -1.532974117 |
| 0.017407971  | 1.37151414   | 0.98295273   |
| 3.190028717  | 2.174038233  | 0.456001802  |
| 0.801763283  | 0.201953631  | 0.474717555  |
| -1.768465163 | -1.897691981 | -1.265634805 |
| 2.400929091  | 1.970200461  | -2.078486512 |
| 0.611818719  | 0.038367843  | 0.692519179  |
| -1.479834282 | -0.922197731 | -1.2908218   |
| 0.444471715  | 1.290119869  | 1.73745876   |
| -2.429843962 | 0.32986605   | -0.395830968 |
| 5.088393617  | 0.538689373  | -2.268884636 |
| -0.37136122  | -2.026664306 | -2.188584929 |
| -2.030054391 | -0.142194899 | -0.038810566 |
| 5.321533541  | -0.693323804 | -0.697120094 |
| -0.155847432 | 0.71876273   | 0.086368499  |
| -2.4417862   | -2.813995988 | -2.578075046 |
| -1.890483276 | 1.45176644   | 0.816996752  |
| 0.336195202  | -2.416783654 | -1.264837891 |
| -0.738129665 | -2.42039698  | -0.602301388 |
| -0.030117206 | -0.597833783 | -2.554005762 |
| 2.744559622  | -2.34995332  | 1.264569799  |
| 0.420272387  | -1.726753047 | -0.190681199 |
| -1.874972493 | -2.315127972 | -0.427282393 |
| -1.079471279 | -1.10057749  | -0.030450066 |
| 0.223149248  | -0.922463373 | 0.079646528  |
| -0.253161891 | -1.906324118 | -1.721017024 |
| -0.437228516 | -0.055742793 | -1.849085662 |
| -0.903993051 | -1.037856669 | -0.840792431 |
| -2.883936145 | -1.526201004 | -0.024057185 |
| -0.148283109 | -1.315751027 | -2.503876225 |

|              |              |              |
|--------------|--------------|--------------|
| -1.355462057 | 0.248235274  | -1.997485913 |
| -2.198973318 | -1.979592084 | 0.570098939  |
| -1.639448615 | -0.48251265  | -0.314470286 |
| -1.640707112 | -1.592485486 | -1.021182512 |
| -0.782050563 | 0.322411604  | -1.450018154 |
| -2.461295454 | 1.701288396  | -1.042397438 |
| 3.820685741  | -1.936800929 | -1.168564567 |
| -2.354529772 | 2.635263304  | 1.988470162  |
| -1.456363422 | -1.594707996 | -2.147677675 |
| 2.389585365  | 3.683017026  | 1.491421111  |
| -1.027333788 | -1.118409946 | 0.737843048  |
| -0.636364895 | 1.516833377  | 1.850100182  |
| -0.909562396 | -0.89481125  | -1.256718242 |
| -0.707021338 | 2.834530789  | -0.533912059 |
| 0.270866423  | -0.894633228 | -1.822469972 |
| -0.683854852 | -0.448582701 | -0.563265482 |
| -0.757417913 | -2.076007917 | -0.75096852  |
| -1.392143961 | -2.349608593 | -1.872190591 |
| -0.752239851 | 0.384023856  | -1.657564761 |
| -2.753817754 | 2.800562071  | -2.730878593 |
| 0.106836705  | -0.247365586 | -1.793405087 |
| -1.687596824 | -2.118346703 | -2.032554307 |
| -0.153800926 | -1.547276236 | -0.029089998 |
| -1.538270791 | -2.707923561 | -1.763563359 |
| -0.97604598  | -2.109021713 | -1.315721662 |
| -2.16982243  | 0.873753538  | -0.053033609 |
| -1.479650227 | -1.960490493 | -1.915083436 |
| -0.925044894 | 1.177268942  | 0.210701924  |
| -0.02399151  | 2.379515659  | 2.295394978  |
| 0.588072515  | 1.706532928  | -1.450214924 |
| -2.726793189 | -1.313412761 | -0.340970634 |
| -1.918327656 | 0.156758087  | -0.147004499 |
| -2.391983897 | -2.81488301  | 1.441196687  |
| -1.78359785  | -0.15580222  | -0.391094955 |
| -2.169074271 | -1.125754712 | 0.339697969  |
| 2.128565048  | 1.061918992  | 2.210910989  |
| -2.376873785 | -2.45526702  | -2.172767954 |
| -0.988975117 | -2.662076137 | -2.427331057 |
| -1.902578156 | 0.915938731  | -0.707976166 |
| 0.76326294   | -0.930815344 | -1.879348453 |
| -1.401845654 | -0.459313777 | 0.113482738  |
| -2.469785255 | -0.288328471 | -0.106199357 |
| -2.784063274 | -1.547677861 | 2.643724031  |
| 0.025692787  | 0.8243923    | -2.168846023 |
| -2.328362513 | -1.303849921 | -1.392460436 |
| -0.829269617 | -1.953193927 | -0.430022725 |

|              |              |              |
|--------------|--------------|--------------|
| 1.547698734  | -2.870011411 | -1.974363885 |
| -0.979761673 | -1.555041487 | -1.139746008 |
| 3.490117924  | -2.605906905 | -0.708538559 |
| -1.19355424  | -0.728907876 | -2.219405784 |
| 0.547430967  | 0.538451497  | -0.161853439 |
| -0.810276879 | -0.894726684 | -2.773032153 |
| 0.753867185  | 1.406459054  | -1.878461016 |
| -1.86566891  | -2.680369923 | -1.429591566 |
| 1.016879778  | -1.885442652 | -2.333354349 |
| -2.322702232 | -1.374579394 | -2.162828233 |
| 4.533181816  | -0.31140867  | -0.489317488 |
| -1.205081223 | 3.085238009  | -2.325023399 |
| 0.371206258  | 1.67756355   | -0.909357916 |
| -2.283476917 | -0.624707461 | -0.094568803 |
| -0.458741717 | -2.47973008  | -0.094174914 |
| 2.093318504  | -0.437882464 | -1.244155485 |
| -0.257566228 | -1.706266456 | -2.733616881 |
| 2.852529911  | -0.825180731 | -2.03138776  |
| -2.484580215 | -2.535799026 | 3.290068409  |
| -2.334417174 | 0.966385993  | 1.06426617   |
| -1.491846866 | -1.288792454 | -1.17716985  |
| 3.576221162  | 1.398041116  | -1.841443396 |
| -1.154874162 | 0.447303252  | -0.362265108 |
| -1.337335393 | -0.149533738 | -1.812969459 |
| 1.647484919  | 1.669842828  | 0.469912562  |
| 0.590479783  | 0.441048915  | -0.715949009 |
| -2.054498717 | -2.647233286 | -0.737518225 |
| -0.290691109 | 0.079473923  | 0.441546559  |
| -2.468353044 | 8.387171092  | 8.294811718  |
| 2.397176786  | -2.657839766 | 1.148023642  |
| -2.597679548 | 0.59735709   | 2.075079724  |
| 4.347768645  | 7.301000637  | -2.307494346 |
| 0.989516893  | -0.511376711 | -1.423722271 |
| -1.784858351 | -0.748626275 | -2.065434146 |
| -1.041404569 | -1.169897556 | -1.279753683 |
| -2.45480887  | -2.441059678 | -0.297862825 |
| 1.008117978  | 1.022397583  | 0.222296293  |
| 1.345917955  | -1.347354421 | 1.392436887  |
| -0.606828249 | -0.696076448 | -2.671061915 |
| 0.802794359  | 0.233384258  | -2.181623983 |
| -1.747153056 | -2.289752014 | -2.023467416 |
| -1.392681845 | -0.320170422 | 0.349891408  |
| -0.899807617 | -1.988177616 | -0.229109575 |
| 1.059101224  | -2.091599504 | 0.674891673  |
| -1.42591619  | -0.439104969 | -0.264895416 |
| -1.053234997 | 0.809514673  | -2.048861523 |

|              |              |              |
|--------------|--------------|--------------|
| -1.696379188 | -0.196971866 | -0.052774642 |
| -1.52921623  | -0.910829387 | -1.021926902 |
| 2.247908108  | 0.082447855  | -2.643796679 |
| -2.836041896 | -1.65722061  | 0.955299635  |
| 0.011031168  | 1.209080963  | 0.561160969  |
| 0.049574809  | -1.966926471 | -1.555321761 |
| 1.788361904  | -1.199883097 | -0.543381993 |
| 0.891148913  | -1.493384155 | -1.106498817 |
| -0.448294588 | -2.552982225 | -1.200693695 |
| 1.034735459  | 0.404664512  | 0.130581987  |
| -2.044902996 | -2.424297283 | -1.295803186 |
| 1.051335235  | 3.114124513  | -3.060593509 |
| -1.347421355 | -1.063334996 | -1.817815824 |
| -1.456916413 | 1.544214003  | -2.597159407 |
| -2.062753143 | -0.107483044 | -0.428549704 |
| -1.052347791 | -0.366520862 | -2.441888687 |
| 1.391951555  | 2.33716858   | 3.854770802  |
| -1.724197968 | -0.116819784 | -0.231810095 |
| -1.435764987 | -1.796472593 | -1.592837742 |
| -0.535585716 | -1.119568159 | -1.843264094 |
| 0.396848903  | -1.298299746 | -0.270909066 |
| -2.077402001 | -2.106747949 | -0.742743792 |
| 5.873547918  | -1.706890362 | 5.334681012  |
| -0.269149256 | 0.260878992  | -2.064862879 |
| -0.635123249 | -0.864179088 | -0.673455393 |
| -2.952243591 | 2.513871349  | 4.86493414   |
| -2.182705631 | -1.692508682 | -1.851813894 |
| -1.092910471 | -1.334431031 | -0.814945693 |
| -0.2428321   | 0.893019859  | -0.699651745 |
| 3.76318887   | -2.871978839 | -0.595574334 |
| 0.86018194   | 0.178519145  | -1.045703248 |
| 4.785845568  | 5.090727383  | -2.49247796  |
| -0.212927292 | -0.168117694 | -0.106670286 |
| 1.788873763  | 1.013402588  | 1.664098086  |
| -2.059334317 | -0.798166352 | 0.847127246  |
| -2.365561035 | -1.32489874  | -3.006015381 |
| 0.616889649  | -0.509856558 | -1.03758432  |
| 0.234402344  | -2.836935904 | -0.686781929 |
| -1.873302809 | -0.208676909 | -1.70803744  |
| -1.677100978 | -1.355885225 | -2.237991127 |
| -2.555249205 | 1.084989685  | -1.380653716 |
| 3.793073393  | 2.570400826  | -1.445881807 |
| 1.470853287  | -0.275600251 | -1.822675171 |
| -1.038983428 | -1.277845925 | -1.890240352 |
| 0.849703562  | -2.778113051 | 8.130651219  |
| -3.002553084 | 1.168418008  | -0.604611153 |

|              |              |              |
|--------------|--------------|--------------|
| -2.556210129 | 0.605222533  | 0.41639723   |
| 1.276685153  | -2.192967827 | 3.664085311  |
| 0.088371747  | 1.100874307  | -2.064799921 |
| -0.267021988 | -1.000690771 | -1.63359727  |
| -0.224212064 | -1.043754175 | -1.679604051 |
| 1.241163492  | -2.42256492  | -1.36234995  |
| 1.126860633  | -0.482708135 | -0.754572113 |
| 0.45783588   | 4.034340966  | 4.395051085  |
| -0.021997246 | 0.506291958  | 0.207205083  |
| -0.670384772 | -1.503649651 | -1.104802533 |
| -2.216222197 | -0.35183188  | -1.435656178 |
| 0.643769923  | -2.919625289 | -3.200981642 |
| -1.093417883 | -1.39080288  | -2.412191498 |
| -0.875015855 | 0.735704989  | -2.142469803 |
| 2.934568644  | -1.458148025 | -2.668777383 |
| -0.292256844 | 0.701492228  | -1.118165927 |
| 0.117218802  | -0.350921828 | -1.669677568 |
| -1.190332603 | -1.065414748 | -2.723930331 |
| 0.043041068  | -1.386489666 | -2.387581851 |
| -0.004094346 | -1.272798525 | -2.850636396 |
| -1.302108956 | -2.255541798 | -0.614035458 |
| -0.011042867 | -0.419467979 | -1.699004626 |
| 0.049075541  | -0.737446787 | -0.498506703 |
